# Supplementary material for: Mapping of prehaustorial resistance against wheat leaf rust in einkorn (Triticum monococcum), a progenitor of wheat
Source: Front Plant Sci. 2023 Oct 23;14:1252123. doi: 10.3389/fpls.2023.1252123 (PMC10626456; doi:10.3389/fpls.2023.1252123)
Supplement: Supplementary file 2 [file Table_2.xlsx]

## Sheet: Read_me
Table S2: Genetic maps constructed using the dominant and co-dominant DArT-seq markers.
ReadMe
Three maps were constructed:
1. The first map contains data from codominant DArT-seq markers (grey tabs).
2. The second map contains data from DArT-seq markers that were dominant for Pi272560 (blue tabs).
3. The third map contains data from DArT-seq markers that were dominant for 36554 (yellow tabs).
Furthermore, next to the cM positions, QTL-values for macroscopic resistance and haustorial mother cell data (48 hours after inoculation (hai) and 72 hai) were presented.
LOD-cutoff values for the respective chromosomes were mentioned in header headerline.
Tabs that include significant QTLs were highlighted in green.
The data was generated with the software JoinMap (van Ooijen 2006) and MapQTL 5.0 by interval mapping (Van Ooijen, 2006; Kyazma, Wageningen, Netherlands).
Van Ooijen, J. W. (2006). JoinMap 4.0, Software for the Calculation of Genetic Linkage Maps in Experimental Populations. Wageningen: Kyazma B.V.

## Sheet: C1
48hai	Intervall (0.95)	2.9													72hai	Intervall (0.95)	2.9													Macro	Intervall (0.95)	2.8
Chromosome	Nr	Group	Position	Locus	LOD	# Iter.	mu_A	mu_H	mu_B	Variance	% Expl.	Additive	Dominance	GIC		Nr	Group	Position	Locus	LOD	# Iter.	mu_A	mu_H	mu_B	Variance	% Expl.	Additive	Dominance	GIC		Nr	Group	Position	Locus	LOD	# Iter.	mu_A	mu_H	mu_B	Variance	% Expl.	Additive	Dominance	GIC
1A	1	1	0	SNP_1021118	0.06	4	1.93308	2.0268	1.88929	2.18179	0.2	0.0218956	0.115623	1		1	1	0	SNP_1021118	1.41	4	6.3759	4.60317	4.90143	13.551	3.5	0.737234	-1.03549	1		1	1	0	SNP_1021118	0.82	4	0.358974	0.247525	0.119048	0.308742	2	0.119963	0.00851376	1
1A	2	1	0.79	SNP_1859758	0.11	4	1.95421	2.0399	1.84659	2.17893	0.3	0.0538098	0.139495	1		2	1	0.79	SNP_1859758	1.26	4	6.34368	4.6932	4.75136	13.6027	3.1	0.79616	-0.854324	1		2	1	0.79	SNP_1859758	0.93	4	0.368421	0.25	0.113636	0.307824	2.3	0.127392	0.00897129	1
1A	3	1	1.79		0.21	4	1.891	2.07476	1.82773	2.17323	0.6	0.031632	0.215398	0.998		3	1	1.79		2.06	4	6.63803	4.53417	4.76515	13.3271	5.1	0.93644	-1.16742	0.998		3	1	1.79		0.85	4	0.351019	0.254822	0.113614	0.3085	2.1	0.118703	0.0225057	0.998
1A	4	1	1.846	SNP_3575230	0.22	4	1.888	2.07653	1.82674	2.17286	0.6	0.0306279	0.219154	1		4	1	1.846	SNP_3575230	2.08	4	6.6415	4.53184	4.765	13.3227	5.1	0.93825	-1.17141	1		4	1	1.846	SNP_3575230	0.84	4	0.35	0.255102	0.113636	0.30854	2.1	0.118182	0.0232839	1
1A	5	1	2.846		0.29	5	1.87078	2.09761	1.81076	2.16825	0.8	0.0300103	0.256842	0.969		5	1	2.846		1.82	5	6.56508	4.58135	4.70895	13.3916	4.6	0.928066	-1.05567	0.969		5	1	2.846		0.68	5	0.336539	0.259	0.123325	0.309499	1.8	0.106607	0.0290687	0.969
1A	6	1	3.846		0.35	5	1.85658	2.11412	1.80381	2.16457	1	0.0263834	0.283921	0.972		6	1	3.846		1.53	5	6.44862	4.65769	4.65176	13.4902	3.9	0.89843	-0.8925	0.972		6	1	3.846		0.5	5	0.317749	0.261595	0.139835	0.310959	1.3	0.0889572	0.0328033	0.972
1A	7	1	4.673	SNP_3574712	0.4	4	1.848	2.12235	1.80673	2.1631	1	0.0206354	0.294988	1		7	1	4.673	SNP_3574712	1.28	4	6.309	4.74502	4.61075	13.5952	3.2	0.849124	-0.714854	1		7	1	4.673	SNP_3574712	0.35	4	0.3	0.260862	0.160009	0.312413	0.9	0.0699957	0.0308576	1
1A	8	1	5.673		0.32	5	1.85019	2.11402	1.81515	2.16522	0.9	0.0175187	0.281352	0.955		8	1	5.673		1.19	5	6.25886	4.7986	4.53704	13.6175	3	0.860912	-0.599349	0.955		8	1	5.673		0.26	4	0.278854	0.265337	0.165991	0.313054	0.7	0.0564314	0.0429153	0.955
1A	9	1	6.673		0.24	6	1.85733	2.09763	1.8354	2.16944	0.7	0.0109638	0.251263	0.931		9	1	6.673		1.11	5	6.19518	4.85855	4.4543	13.6398	2.9	0.870437	-0.466187	0.931		9	1	6.673		0.2	6	0.253882	0.270894	0.173618	0.3135	0.5	0.0401322	0.0571443	0.931
1A	10	1	7.673		0.16	6	1.86925	2.07363	1.86809	2.17487	0.5	0.00057731	0.204961	0.93		10	1	7.673		1.04	5	6.11891	4.91876	4.37404	13.6618	2.7	0.872435	-0.327723	0.93		10	1	7.673		0.17	6	0.228883	0.27582	0.183088	0.313667	0.5	0.0228976	0.0698345	0.93
1A	11	1	8.673		0.09	5	1.88422	2.0453	1.90929	2.17982	0.3	-0.0125379	0.148549	0.951		11	1	8.673		0.98	5	6.03292	4.97288	4.30872	13.6858	2.5	0.862103	-0.197937	0.951		11	1	8.673		0.17	5	0.208046	0.278358	0.194526	0.313668	0.5	0.00675995	0.0770718	0.951
1A	12	1	9.673		0.04	4	1.89963	2.01799	1.95086	2.18293	0.1	-0.0256158	0.0927445	0.993		12	1	9.673		0.93	4	5.94134	5.01686	4.26626	13.7142	2.3	0.837542	-0.0869396	0.993		12	1	9.673		0.19	4	0.192132	0.278462	0.207623	0.313618	0.5	-0.00774574	0.0785848	0.993
1A	13	1	9.795	SNP_1249392	0.04	4	1.90143	2.01495	1.95558	2.18317	0.1	-0.0270764	0.0864413	1		13	1	9.795	SNP_1249392	0.93	4	5.93	5.02144	4.26279	13.7181	2.3	0.833605	-0.074952	1		13	1	9.795	SNP_1249392	0.2	4	0.190476	0.278351	0.209302	0.31361	0.5	-0.00941307	0.0784613	1
1A	14	1	10.795		0.07	4	1.86208	2.02273	1.97703	2.18119	0.2	-0.0574752	0.103179	0.952		14	1	10.795		0.97	5	5.95703	5.04221	4.20046	13.6824	2.6	0.878284	-0.0365287	0.952		14	1	10.795		0.2	5	0.190763	0.280263	0.205511	0.313479	0.5	-0.00737377	0.0821261	0.952
1A	15	1	11.795		0.12	5	1.82197	2.03045	1.99934	2.17813	0.3	-0.0886864	0.119796	0.917		15	1	11.795		1.01	6	5.97996	5.0568	4.15737	13.6528	2.8	0.911294	-0.0118669	0.917		15	1	11.795		0.21	6	0.190676	0.282387	0.202015	0.313324	0.6	-0.00566975	0.0860418	0.917
1A	16	1	12.795		0.19	5	1.78233	2.03803	2.02181	2.17404	0.5	-0.119742	0.135964	0.894		16	1	12.795		1.03	6	5.99592	5.06423	4.13796	13.6342	2.9	0.928978	-0.00271178	0.894		16	1	12.795		0.22	6	0.190202	0.284637	0.199063	0.313155	0.6	-0.00443047	0.0900045	0.894
1A	17	1	13.795		0.27	5	1.74411	2.04559	2.04354	2.16904	0.7	-0.149716	0.151765	0.884		17	1	13.795		1.04	6	6.00234	5.0655	4.14131	13.6288	3	0.930518	-0.00632829	0.884		17	1	13.795		0.23	7	0.189351	0.286926	0.196866	0.312981	0.7	-0.00375735	0.0938173	0.884
1A	18	1	14.795		0.37	5	1.70802	2.05332	2.06372	2.16329	1	-0.177852	0.167451	0.886		18	1	14.795		1.02	6	5.99731	5.06244	4.1639	13.6363	2.9	0.916705	-0.0181617	0.886		18	1	14.795		0.25	6	0.188153	0.289158	0.195599	0.312815	0.8	-0.00372305	0.0972816	0.886
1A	19	1	15.795		0.48	5	1.67453	2.06134	2.08182	2.157	1.3	-0.203647	0.183168	0.901		19	1	15.795		0.99	6	5.97965	5.05722	4.20119	13.6552	2.8	0.889227	-0.0331974	0.901		19	1	15.795		0.27	6	0.18666	0.291253	0.19536	0.312668	0.8	-0.00435014	0.100243	0.901
1A	20	1	16.795		0.6	5	1.64394	2.06959	2.0977	2.15039	1.6	-0.226879	0.198775	0.928		20	1	16.795		0.95	5	5.94908	5.05204	4.24829	13.6827	2.6	0.850394	-0.0466469	0.928		20	1	16.795		0.3	6	0.184941	0.293115	0.196216	0.31255	0.8	-0.00563737	0.102537	0.928
1A	21	1	17.795		0.73	4	1.61644	2.07785	2.11159	2.14366	1.9	-0.247572	0.213831	0.967		21	1	17.795		0.9	5	5.90639	5.04884	4.30046	13.7161	2.3	0.802962	-0.0545885	0.967		21	1	17.795		0.33	5	0.183076	0.294656	0.198169	0.312469	0.9	-0.00754678	0.104033	0.967
1A	22	1	18.447	SNP_2276457	0.82	4	1.60023	2.08306	2.1198	2.13931	2.1	-0.259784	0.223047	1		22	1	18.447	SNP_2276457	0.86	4	5.87295	5.04841	4.3354	13.7396	2.2	0.768777	-0.0557682	1		22	1	18.447	SNP_2276457	0.35	4	0.181818	0.295455	0.2	0.312438	0.9	-0.00909091	0.104545	1
1A	23	1	19.447		0.76	5	1.61175	2.08439	2.11066	2.14174	2	-0.249452	0.223187	0.952		23	1	19.447		0.92	5	5.9383	5.01377	4.32612	13.7075	2.4	0.806093	-0.118434	0.952		23	1	19.447		0.25	6	0.185147	0.289522	0.207755	0.31298	0.7	-0.0113042	0.0930708	0.952
1A	24	1	20.447		0.65	5	1.63557	2.07576	2.10753	2.14678	1.8	-0.23598	0.204211	0.938		24	1	20.447		0.95	5	5.9923	4.95755	4.36608	13.6929	2.5	0.81311	-0.221638	0.938		24	1	20.447		0.16	6	0.188806	0.278414	0.224958	0.313765	0.4	-0.0180759	0.071532	0.938
1A	25	1	21.447		0.51	5	1.6778	2.05459	2.10956	2.15495	1.4	-0.21588	0.160905	0.957		25	1	21.447		0.98	5	6.03095	4.88659	4.4448	13.6903	2.5	0.793075	-0.351285	0.957		25	1	21.447		0.11	5	0.192592	0.265252	0.245659	0.314309	0.3	-0.0265335	0.0461258	0.957
1A	26	1	22.307	SNP_2258746	0.38	4	1.73348	2.02386	2.11469	2.16381	1	-0.190608	0.0997694	1		26	1	22.307	SNP_2258746	1	4	6.04957	4.82512	4.524	13.6912	2.5	0.762783	-0.461666	1		26	1	22.307	SNP_2258746	0.09	4	0.195652	0.255814	0.26	0.314457	0.2	-0.0321739	0.0279879	1
1A	27	1	23.307		0.37	5	1.7331	2.01481	2.13293	2.16296	1	-0.199916	0.0817997	0.953		27	1	23.307		0.96	5	6.03351	4.86289	4.46049	13.6905	2.5	0.786512	-0.384108	0.953		27	1	23.307		0.11	5	0.188308	0.261225	0.257025	0.314215	0.3	-0.0343588	0.0385589	0.953
1A	28	1	24.307		0.35	6	1.73999	2.00232	2.15283	2.16279	1	-0.206424	0.0559086	0.919		28	1	24.307		0.91	5	6.00618	4.9046	4.39272	13.6924	2.5	0.806732	-0.29485	0.919		28	1	24.307		0.14	6	0.180789	0.266938	0.252954	0.313902	0.4	-0.0360827	0.0500664	0.919
1A	29	1	25.307		0.33	7	1.75602	1.98614	2.17363	2.16335	1	-0.208806	0.0213073	0.898		29	1	25.307		0.86	6	5.96597	4.94755	4.32763	13.699	2.5	0.81917	-0.199249	0.898		29	1	25.307		0.18	6	0.173711	0.272492	0.247972	0.313537	0.5	-0.0371303	0.0616505	0.898
1A	30	1	26.307		0.31	7	1.78271	1.96637	2.19405	2.16453	1	-0.205671	-0.022014	0.89		30	1	26.307		0.82	6	5.91181	4.98953	4.27201	13.7121	2.4	0.8199	-0.102383	0.89		30	1	26.307		0.21	6	0.16761	0.277425	0.242471	0.313155	0.6	-0.0374307	0.0723843	0.89
1A	31	1	27.307		0.3	7	1.81842	1.94474	2.21236	2.16581	0.9	-0.196971	-0.0706503	0.894		31	1	27.307		0.77	6	5.84436	5.02867	4.23089	13.7328	2.2	0.806735	-0.008956	0.894		31	1	27.307		0.26	6	0.162775	0.281409	0.236929	0.312799	0.8	-0.0370772	0.0815576	0.894
1A	32	1	28.307		0.3	5	1.85615	1.92532	2.22677	2.1666	0.9	-0.18531	-0.116139	0.911		32	1	28.307		0.72	5	5.76666	5.06305	4.20697	13.7601	2	0.779843	0.0762369	0.911		32	1	28.307		0.3	6	0.159255	0.284308	0.231746	0.312502	0.8	-0.0362455	0.0888074	0.911
1A	33	1	29.307		0.3	5	1.88827	1.91186	2.23619	2.16704	0.8	-0.17396	-0.15037	0.942		33	1	29.307		0.66	5	5.68414	5.0906	4.20101	13.7918	1.8	0.741565	0.14803	0.942		33	1	29.307		0.34	5	0.156958	0.286143	0.227161	0.312283	0.9	-0.0351015	0.0940827	0.942
1A	34	1	30.307		0.31	4	1.91259	1.90488	2.24051	2.16763	0.8	-0.163957	-0.171672	0.985		34	1	30.307		0.61	4	5.60271	5.10978	4.21224	13.8253	1.6	0.695236	0.202302	0.985		34	1	30.307		0.37	4	0.155735	0.287027	0.223252	0.312148	1	-0.0337585	0.0975342	0.985
1A	35	1	30.603	SNP_1126226	0.31	4	1.91844	1.90388	2.24086	2.16788	0.8	-0.161206	-0.175773	1		35	1	30.603	SNP_1126226	0.59	4	5.57956	5.11376	4.21861	13.8353	1.5	0.680472	0.214679	1		35	1	30.603	SNP_1126226	0.38	4	0.155556	0.287129	0.222222	0.312124	1	-0.0333333	0.0982398	1
1A	36	1	31.603		0.33	4	1.88319	1.91907	2.24615	2.16698	0.8	-0.181477	-0.145597	0.994		36	1	31.603		0.51	4	5.44379	5.16413	4.2278	13.8621	1.3	0.607999	0.328334	0.994		36	1	31.603		0.5	4	0.146844	0.294965	0.22214	0.311214	1.3	-0.037648	0.110473	0.994
1A	37	1	31.741	SNP_1067795	0.33	4	1.87875	1.92137	2.24657	2.16684	0.8	-0.183911	-0.141292	1		37	1	31.741	SNP_1067795	0.5	4	5.42479	5.1702	4.2325	13.8666	1.3	0.596146	0.341558	1		37	1	31.741	SNP_1067795	0.52	4	0.145833	0.295918	0.222222	0.311098	1.3	-0.0381944	0.111891	1
1A	38	1	32.741		0.39	5	1.86669	1.91346	2.27608	2.1619	1.1	-0.204698	-0.157928	0.959		38	1	32.741		0.51	5	5.49119	5.13852	4.24542	13.8564	1.3	0.622883	0.270213	0.959		38	1	32.741		0.48	5	0.149716	0.296451	0.220009	0.311235	1.3	-0.0351464	0.111589	0.959
1A	39	1	33.741		0.45	6	1.855	1.90702	2.30028	2.15717	1.3	-0.22264	-0.170618	0.931		39	1	33.741		0.52	5	5.55936	5.09856	4.27086	13.8466	1.4	0.644253	0.183449	0.931		39	1	33.741		0.44	5	0.15424	0.29643	0.218142	0.311433	1.2	-0.031951	0.110239	0.931
1A	40	1	34.741		0.51	6	1.8437	1.90277	2.31797	2.15311	1.5	-0.237134	-0.178063	0.914		40	1	34.741		0.53	5	5.62547	5.05177	4.30912	13.837	1.5	0.658174	0.0844729	0.914		40	1	34.741		0.41	5	0.159447	0.295784	0.216652	0.311692	1.1	-0.0286025	0.107735	0.914
1A	41	1	35.741		0.56	6	1.8329	1.90086	2.32921	2.14994	1.6	-0.248153	-0.180192	0.91		41	1	35.741		0.55	5	5.68522	5.00072	4.35914	13.8279	1.5	0.663041	-0.0214612	0.91		41	1	35.741		0.37	5	0.165341	0.294471	0.215545	0.312008	1	-0.0251021	0.104028	0.91
1A	42	1	36.741		0.61	6	1.82283	1.90104	2.33476	2.14771	1.7	-0.255966	-0.177753	0.917		42	1	36.741		0.58	5	5.73493	4.94882	4.41771	13.8196	1.6	0.65861	-0.127492	0.917		42	1	36.741		0.33	5	0.171872	0.292492	0.214805	0.312369	0.9	-0.0214663	0.0991533	0.917
1A	43	1	37.741		0.65	5	1.81376	1.90285	2.33561	2.14634	1.8	-0.260926	-0.171828	0.936		43	1	37.741		0.61	5	5.77231	4.89992	4.47963	13.8126	1.6	0.646342	-0.22605	0.936		43	1	37.741		0.29	5	0.178925	0.289904	0.214393	0.312755	0.8	-0.0177341	0.093245	0.936
1A	44	1	38.741		0.69	5	1.80595	1.90581	2.33272	2.14571	1.8	-0.26338	-0.163523	0.967		44	1	38.741		0.65	5	5.79672	4.8574	4.53929	13.8077	1.7	0.628715	-0.310605	0.967		44	1	38.741		0.25	4	0.186314	0.286816	0.214251	0.313143	0.6	-0.0139684	0.0865338	0.967
1A	45	1	39.54	SNP_3024975	0.71	4	1.80077	1.90871	2.32829	2.14566	1.8	-0.263762	-0.155825	1		45	1	39.54	SNP_3024975	0.67	4	5.80731	4.82943	4.58262	13.8058	1.7	0.612344	-0.365532	1		45	1	39.54	SNP_3024975	0.22	4	0.192308	0.284091	0.214286	0.31344	0.6	-0.010989	0.0807942	1
1A	46	1	40.54		0.7	5	1.80887	1.8976	2.33625	2.14428	1.9	-0.263691	-0.17496	0.957		46	1	40.54		0.69	5	5.84261	4.83009	4.56137	13.7881	1.8	0.64062	-0.371892	0.957		46	1	40.54		0.16	5	0.197627	0.279455	0.216352	0.31379	0.4	-0.00936264	0.0724654	0.957
1A	47	1	41.54		0.68	6	1.81748	1.88866	2.33934	2.14372	1.9	-0.26093	-0.189747	0.926		47	1	41.54		0.69	6	5.86465	4.83893	4.53884	13.7772	1.9	0.662904	-0.36281	0.926		47	1	41.54		0.11	5	0.204355	0.273689	0.219401	0.314176	0.3	-0.00752322	0.061811	0.926
1A	48	1	42.54		0.65	6	1.82623	1.8827	2.33635	2.1443	1.9	-0.255061	-0.198588	0.907		48	1	42.54		0.68	6	5.87013	4.8572	4.51542	13.7747	1.9	0.67736	-0.335575	0.907		48	1	42.54		0.06	6	0.212524	0.266839	0.223394	0.314558	0.2	-0.00543469	0.0488801	0.907
1A	49	1	43.54		0.6	6	1.83478	1.88041	2.32624	2.14629	1.8	-0.245729	-0.2001	0.901		49	1	43.54		0.66	6	5.85691	4.88541	4.49179	13.7812	1.9	0.68256	-0.28894	0.901		49	1	43.54		0.03	6	0.221944	0.259156	0.228092	0.31488	0.1	-0.00307431	0.0341379	0.901
1A	50	1	44.54		0.55	6	1.84293	1.88234	2.30831	2.14981	1.6	-0.232692	-0.193282	0.906		50	1	44.54		0.63	6	5.8247	4.92286	4.46901	13.7956	1.8	0.677846	-0.223996	0.906		50	1	44.54		0.01	5	0.232097	0.251162	0.233026	0.315093	0	-0.000464431	0.0186002	0.906
1A	51	1	45.54		0.48	6	1.85052	1.88864	2.28251	2.15469	1.4	-0.215996	-0.177877	0.923		51	1	45.54		0.59	6	5.77585	4.96728	4.44846	13.8149	1.6	0.663693	-0.144877	0.923		51	1	45.54		0	4	0.242232	0.243533	0.237611	0.315174	0	0.00231049	0.0036115	0.923
1A	52	1	46.54		0.41	5	1.85753	1.89882	2.25004	2.1604	1.1	-0.196253	-0.15497	0.953		52	1	46.54		0.56	5	5.71531	5.01492	4.43166	13.8355	1.5	0.641825	-0.0585672	0.953		52	1	46.54		0	4	0.251654	0.236836	0.241393	0.315142	0	0.00513031	-0.0096878	0.953
1A	53	1	47.54		0.34	4	1.86402	1.91153	2.21366	2.16613	0.9	-0.174821	-0.12731	0.994		53	1	47.54		0.53	4	5.64947	5.06146	4.41993	13.8545	1.3	0.614768	0.0267614	0.994		53	1	47.54		0.02	4	0.259939	0.231356	0.244173	0.31504	0	0.00788297	-0.0207002	0.994
1A	54	1	47.663	SNP_1159766	0.33	4	1.86478	1.91318	2.20909	2.1668	0.8	-0.172154	-0.123755	1		54	1	47.663	SNP_1159766	0.53	4	5.6413	5.06692	4.41889	13.8566	1.3	0.611208	0.0368265	1		54	1	47.663	SNP_1159766	0.02	4	0.26087	0.230769	0.244444	0.315025	0	0.00821256	-0.0218878	1
1A	55	1	48.663		0.32	6	1.79965	1.95647	2.19095	2.16594	0.9	-0.195651	-0.0388293	0.956		55	1	48.663		0.74	5	5.86327	4.96436	4.40086	13.7708	1.9	0.731209	-0.167706	0.956		55	1	48.663		0.14	6	0.303677	0.213038	0.237275	0.313795	0.4	0.0332009	-0.0574381	0.956
1A	56	1	49.663		0.33	4	1.76451	1.99173	2.15525	2.16615	0.9	-0.195368	0.0318456	0.983		56	1	49.663		0.96	4	6.00858	4.89802	4.39625	13.7004	2.4	0.806165	-0.304396	0.983		56	1	49.663		0.32	5	0.330082	0.204625	0.229329	0.312503	0.8	0.0503766	-0.0750798	0.983
1A	57	1	49.904	SNP_3574260	0.33	4	1.762	1.99777	2.14537	2.16663	0.9	-0.191683	0.0440921	1		57	1	49.904	SNP_3574260	1.01	4	6.02867	4.88916	4.39674	13.6904	2.5	0.815965	-0.323537	1		57	1	49.904	SNP_3574260	0.36	4	0.333333	0.204295	0.227288	0.312338	0.9	0.0530229	-0.0760157	1
1A	58	1	50.904		0.42	5	1.73161	1.9988	2.173	2.16068	1.1	-0.220694	0.0464993	0.962		58	1	50.904		1.02	5	6.00188	4.95862	4.27802	13.6708	2.7	0.861927	-0.181334	0.962		58	1	50.904		0.28	5	0.326679	0.207816	0.226822	0.312758	0.8	0.0499285	-0.0689341	0.962
1A	59	1	51.904		0.5	5	1.70551	1.99817	2.19935	2.15468	1.4	-0.246921	0.0457372	0.938		59	1	51.904		1.06	5	5.95465	5.03981	4.15773	13.6482	2.8	0.898457	-0.0163815	0.938		59	1	51.904		0.21	6	0.317201	0.212846	0.226055	0.313292	0.6	0.0455727	-0.0587819	0.938
1A	60	1	52.904		0.59	5	1.68507	1.99598	2.22302	2.14918	1.7	-0.268975	0.0419379	0.929		60	1	52.904		1.12	5	5.88745	5.12823	4.04468	13.6221	3	0.921387	0.162162	0.929		60	1	52.904		0.13	6	0.304312	0.219658	0.225044	0.313901	0.4	0.0396344	-0.0450202	0.929
1A	61	1	53.904		0.68	5	1.67014	1.99291	2.24279	2.14456	1.9	-0.286326	0.0364417	0.933		61	1	53.904		1.21	5	5.80453	5.21797	3.94696	13.593	3.2	0.928787	0.342221	0.933		61	1	53.904		0.07	6	0.288235	0.228055	0.223931	0.314477	0.2	0.0321519	-0.0280286	0.933
1A	62	1	54.904		0.75	5	1.65995	1.98964	2.258	2.14099	2	-0.299022	0.0306673	0.952		62	1	54.904		1.32	5	5.71427	5.30278	3.86916	13.5618	3.4	0.922555	0.511062	0.952		62	1	54.904		0.04	5	0.270879	0.23695	0.222954	0.314874	0.1	0.0239624	-0.00996636	0.952
1A	63	1	55.904		0.83	4	1.65368	1.98662	2.26852	2.13851	2.1	-0.307418	0.0255269	0.985		63	1	55.904		1.45	4	5.62668	5.37754	3.81205	13.5303	3.7	0.907315	0.658179	0.985		63	1	55.904		0.02	4	0.254933	0.244908	0.222333	0.315039	0	0.0163001	0.0062755	0.985
1A	64	1	56.254	SNP_3574470	0.85	4	1.65227	1.98567	2.27114	2.13789	2.2	-0.309432	0.0239621	1		64	1	56.254	SNP_3574470	1.5	4	5.59818	5.40075	3.79667	13.5197	3.7	0.900758	0.703328	1		64	1	56.254	SNP_3574470	0.02	4	0.25	0.247312	0.222222	0.315053	0	0.0138889	0.0112007	1
1A	65	1	57.254		0.98	5	1.63676	1.96519	2.30605	2.12934	2.6	-0.334644	-0.00622027	0.977		65	1	57.254		1.68	5	5.61184	5.45719	3.74732	13.4465	4.3	0.93226	0.777609	0.977		65	1	57.254		0.01	4	0.233442	0.250506	0.23221	0.315101	0	0.000616155	0.0176798	0.977
1A	66	1	58.254		1.1	4	1.62258	1.9537	2.32101	2.12364	2.8	-0.349219	-0.0180964	0.994		66	1	58.254		1.79	4	5.61288	5.49054	3.74668	13.4182	4.5	0.933102	0.81076	0.994		66	1	58.254		0.03	4	0.216753	0.252523	0.243246	0.314976	0.1	-0.0132467	0.0225239	0.994
1A	67	1	58.41	SNP_3574890	1.12	4	1.62048	1.95273	2.32167	2.12306	2.9	-0.350595	-0.0183442	1		67	1	58.41	SNP_3574890	1.8	4	5.61238	5.49352	3.75122	13.4181	4.5	0.930578	0.811714	1		67	1	58.41	SNP_3574890	0.03	4	0.214286	0.252747	0.244898	0.314942	0.1	-0.0153061	0.0231554	1
1A	68	1	59.41		1.34	4	1.54002	2.01648	2.28889	2.11079	3.4	-0.374437	0.102023	0.996		68	1	59.41		1.29	4	5.60041	5.39461	3.96331	13.5893	3.2	0.818551	0.612745	0.996		68	1	59.41		0.06	4	0.205056	0.250174	0.259157	0.314737	0.1	-0.0270503	0.0180677	0.996
1A	69	1	59.472	SNP_1072906	1.35	4	1.53636	2.02	2.28653	2.11013	3.4	-0.375083	0.108553	1		69	1	59.472	SNP_1072906	1.26	4	5.59818	5.38534	3.9842	13.6045	3.1	0.806991	0.59415	1		69	1	59.472	SNP_1072906	0.06	4	0.204545	0.25	0.26	0.31472	0.1	-0.0277273	0.0177273	1
1A	70	1	60.092	SNP_3574809	1.2	4	1.75319	1.84304	2.37192	2.11863	3.1	-0.309366	-0.219519	1		70	1	60.092	SNP_3574809	1.07	4	5.61894	5.3322	4.11528	13.6697	2.7	0.751827	0.465086	1		70	1	60.092	SNP_3574809	0.03	4	0.234043	0.231707	0.264151	0.314972	0.1	-0.0150542	-0.0173894	1
1A	71	1	61.092		1.11	5	1.65465	1.91564	2.33857	2.12134	2.9	-0.341961	-0.0809707	0.96		71	1	61.092		1.14	4	5.5393	5.41179	4.0483	13.6376	2.9	0.745504	0.617995	0.96		71	1	61.092		0.02	4	0.228461	0.238019	0.259062	0.315046	0	-0.0153001	-0.00574262	0.96
1A	72	1	61.788	SNP_3574451	1.07	4	1.60075	1.96227	2.2926	2.12548	2.7	-0.345925	0.0155977	1		72	1	61.788	SNP_3574451	1.17	4	5.458	5.44736	4.02765	13.6352	2.9	0.715176	0.704539	1		72	1	61.788	SNP_3574451	0.01	4	0.225	0.241758	0.254902	0.315069	0	-0.014951	0.00180726	1
1A	73	1	61.927	SNP_3574505	1.3	4	1.57209	1.97298	2.31392	2.11324	3.3	-0.370914	0.0299689	1		73	1	61.927	SNP_3574505	1.29	4	5.48186	5.47368	3.99058	13.5931	3.2	0.745642	0.737459	1		73	1	61.927	SNP_3574505	0	3	0.232558	0.241379	0.25	0.31514	0	-0.00872093	0.000100241	1
1A	74	1	62.03	SNP_3575243	1.13	4	1.63907	1.93709	2.33204	2.12233	2.9	-0.346486	-0.0484623	1		74	1	62.03	SNP_3575243	1.06	4	5.59116	5.34056	4.0742	13.6715	2.6	0.758481	0.50788	1		74	1	62.03	SNP_3575243	0	3	0.232558	0.247191	0.24	0.315144	0	-0.00372093	0.0109119	1
1A	75	1	62.255	SNP_3574265	1.07	4	1.61818	1.97024	2.2928	2.12552	2.7	-0.337309	0.0147472	1		75	1	62.255	SNP_3574265	1.2	4	5.60727	5.37368	4.02373	13.6233	3	0.791774	0.558179	1		75	1	62.255	SNP_3574265	0.02	4	0.227273	0.252874	0.235294	0.315058	0	-0.0040107	0.0215901	1
1A	76	1	62.432	SNP_1200870	1.17	4	1.61818	1.94988	2.3125	2.12033	3	-0.347159	-0.0154629	1		76	1	62.432	SNP_1200870	1.08	4	5.60727	5.35541	4.10396	13.6643	2.7	0.751655	0.499794	1		76	1	62.432	SNP_1200870	0.09	4	0.227273	0.223529	0.283019	0.314478	0.2	-0.0278731	-0.0316164	1
1A	77	1	63.224	SNP_1089483	1.11	4	1.6093	1.96741	2.2982	2.1237	2.8	-0.344449	0.0136606	1		77	1	63.224	SNP_1089483	1.33	4	5.57721	5.42511	3.9649	13.58	3.3	0.806154	0.654058	1		77	1	63.224	SNP_1089483	0.01	4	0.232558	0.238636	0.254902	0.315106	0	-0.0111719	-0.00509369	1
1A	78	1	63.385	SNP_3575164	0.83	4	1.63171	1.98035	2.23288	2.13879	2.1	-0.300589	0.048057	1		78	1	63.385	SNP_3575164	1.41	4	5.36634	5.56034	3.96434	13.5519	3.5	0.701001	0.895	1		78	1	63.385	SNP_3575164	0	3	0.243902	0.238636	0.245283	0.31517	0	-0.00069029	-0.00595637	1
1A	79	1	63.801	SNP_3574176	0.91	4	1.66205	1.93233	2.29816	2.13425	2.3	-0.318056	-0.0477739	1		79	1	63.801	SNP_3574176	1.27	4	5.52872	5.43312	3.9708	13.5995	3.2	0.778959	0.683359	1		79	1	63.801	SNP_3574176	0.21	4	0.179487	0.27957	0.22	0.313488	0.5	-0.0202564	0.0798263	1
1A	80	1	64.484	SNP_3575283	0.92	4	1.64766	1.98275	2.26039	2.13372	2.4	-0.306366	0.028724	1		80	1	64.484	SNP_3575283	1.48	4	5.48979	5.51458	3.9175	13.5288	3.7	0.786143	0.810933	1		80	1	64.484	SNP_3575283	0	3	0.234043	0.240964	0.25	0.315144	0	-0.00797882	-0.00105762	1
1A	81	1	64.761	SNP_1116563	0.72	4	1.62167	2.04512	2.147	2.14523	1.8	-0.262667	0.160783	1		81	1	64.761	SNP_1116563	1.36	4	5.25762	5.57652	3.96686	13.5693	3.4	0.645378	0.964276	1		81	1	64.761	SNP_1116563	0.03	4	0.214286	0.247191	0.254902	0.314942	0.1	-0.0203081	0.0125972	1
1A	82	1	65.113	SNP_3575012	0.91	4	1.59795	2.03463	2.19596	2.13433	2.3	-0.299003	0.137676	1		82	1	65.113	SNP_3575012	1.43	4	5.46864	5.52365	3.94925	13.5436	3.6	0.759696	0.814706	1		82	1	65.113	SNP_3575012	0.09	4	0.227273	0.223529	0.283019	0.314478	0.2	-0.0278731	-0.0316164	1
1A	83	1	65.339	SNP_981842	0.91	4	1.58622	2.11612	2.08811	2.1344	2.3	-0.250945	0.278957	1		83	1	65.339	SNP_981842	1.83	4	5.616	5.5447	3.82426	13.407	4.5	0.89587	0.824568	1		83	1	65.339	SNP_981842	0.02	4	0.222223	0.253012	0.240741	0.315027	0	-0.00925923	0.0215298	1
1A	84	1	65.863	SNP_3574171	0.89	4	1.59587	2.0974	2.11691	2.13552	2.3	-0.26052	0.241013	1		84	1	65.863	SNP_3574171	1.71	4	5.43957	5.63512	3.90018	13.448	4.2	0.769693	0.965253	1		84	1	65.863	SNP_3574171	0	3	0.23913	0.2375	0.25	0.315149	0	-0.00543478	-0.00706522	1
1A	85	1	66.384	SNP_3574974	1.35	4	1.5302	2.14667	2.13569	2.1106	3.4	-0.302741	0.313721	1		85	1	66.384	SNP_3574974	1.43	4	5.4784	5.51013	3.93673	13.546	3.5	0.770835	0.80256	1		85	1	66.384	SNP_3574974	0.13	4	0.2	0.275	0.230769	0.31418	0.3	-0.0153846	0.0596154	1
1A	86	1	66.76	SNP_3575158	0.9	4	1.57902	2.14182	2.00245	2.13529	2.3	-0.211712	0.351081	1		86	1	66.76	SNP_3575158	1.87	4	5.55902	5.54187	3.7442	13.3958	4.6	0.907412	0.890256	1		86	1	66.76	SNP_3575158	0.02	4	0.243902	0.230769	0.26	0.315026	0	-0.00804878	-0.021182	1
1A	87	1	67.491	SNP_3574914	0.83	4	1.59773	2.08827	2.11113	2.13883	2.1	-0.256704	0.233839	1		87	1	67.491	SNP_3574914	2.15	4	5.46818	5.68367	3.72983	13.2989	5.3	0.869175	1.08466	1		87	1	67.491	SNP_3574914	0.01	4	0.227273	0.249998	0.240744	0.315097	0	-0.00673559	0.0159896	1
1A	88	1	68.347	SNP_1091244	1.06	4	1.52275	2.11011	2.0948	2.12635	2.7	-0.286027	0.301333	1		88	1	68.347	SNP_1091244	1.73	4	5.5605	5.52425	3.81003	13.443	4.3	0.875233	0.838983	1		88	1	68.347	SNP_1091244	0.07	4	0.275	0.219777	0.254909	0.314646	0.2	0.0100457	-0.0451772	1
1A	89	1	69.347		1.09	4	1.55441	2.06505	2.18248	2.12415	2.8	-0.314037	0.196609	0.987		89	1	69.347		1.66	4	5.54888	5.57191	3.91159	13.4598	4.2	0.818645	0.841679	0.987		89	1	69.347		0.43	5	0.311936	0.176085	0.280598	0.311586	1.1	0.0156691	-0.120182	0.987
1A	90	1	69.442	SNP_3574892	1.1	4	1.55712	2.06311	2.1859	2.12388	2.8	-0.314392	0.191597	1		90	1	69.442	SNP_3574892	1.65	4	5.54049	5.5763	3.93004	13.4695	4.1	0.805226	0.841031	1		90	1	69.442	SNP_3574892	0.46	4	0.311116	0.174995	0.28071	0.311555	1.1	0.015203	-0.120918	1
1A	91	1	70.442		1.22	5	1.53427	2.05291	2.21884	2.11565	3.2	-0.342282	0.17635	0.928		91	1	70.442		1.44	5	5.51225	5.55145	3.94647	13.5064	3.8	0.782892	0.822086	0.928		91	1	70.442		0.57	8	0.305807	0.15514	0.316538	0.309101	1.9	-0.00536534	-0.156032	0.928
1A	92	1	71.442		1.33	5	1.51314	2.05562	2.23255	2.10921	3.5	-0.359706	0.182776	0.93		92	1	71.442		1.18	5	5.4698	5.49247	4.0312	13.6018	3.1	0.719298	0.741968	0.93		92	1	71.442		0.53	7	0.284002	0.162076	0.328948	0.309571	1.8	-0.022473	-0.144399	0.93
1A	93	1	72.387	SNP_3574785	1.42	4	1.49886	2.0663	2.22679	2.10666	3.6	-0.363964	0.203468	1		93	1	72.387	SNP_3574785	0.92	4	5.41409	5.41776	4.16434	13.72	2.3	0.624876	0.628549	1		93	1	72.387	SNP_3574785	0.4	4	0.25	0.188235	0.320755	0.312008	1	-0.0353774	-0.0971421	1
1A	94	1	72.597	SNP_3574770	1.49	4	1.47791	2.07037	2.22679	2.10261	3.8	-0.374443	0.218016	1		94	1	72.597	SNP_3574770	0.93	4	5.52605	5.36174	4.16434	13.7157	2.3	0.680853	0.516551	1		94	1	72.597	SNP_3574770	0.42	4	0.255814	0.186047	0.320755	0.311849	1.1	-0.0324704	-0.102238	1
1A	95	1	73.597		1.45	4	1.4748	2.05408	2.23812	2.10356	3.7	-0.381661	0.19762	0.972		95	1	73.597		0.75	5	5.61872	5.26739	4.25253	13.7624	2	0.683094	0.331762	0.972		95	1	73.597		0.41	4	0.26641	0.185239	0.316146	0.311891	1	-0.0248682	-0.106038	0.972
1A	96	1	74.597		1.4	4	1.47823	2.03586	2.24723	2.10632	3.6	-0.3845	0.173126	0.972		96	1	74.597		0.59	5	5.71554	5.14054	4.40498	13.8221	1.6	0.655278	0.0802802	0.972		96	1	74.597		0.39	4	0.27752	0.185445	0.309987	0.311989	1	-0.0162337	-0.108309	0.972
1A	97	1	75.597		1.34	4	1.48881	2.01611	2.25303	2.11096	3.4	-0.382115	0.14519	0.998		97	1	75.597		0.5	4	5.80005	5.00251	4.59911	13.8656	1.3	0.60047	-0.197067	0.998		97	1	75.597		0.38	4	0.288944	0.186729	0.302276	0.312134	1	-0.00666597	-0.108881	0.998
1A	98	1	75.643	SNP_2255296	1.33	4	1.48947	2.01517	2.25321	2.11121	3.4	-0.381867	0.143832	1		98	1	75.643	SNP_2255296	0.5	4	5.80342	4.9967	4.60774	13.8667	1.3	0.597843	-0.208875	1		98	1	75.643	SNP_2255296	0.38	4	0.289474	0.186813	0.301887	0.312142	1	-0.00620655	-0.108867	1
1A	99	1	76.643		1.36	6	1.49677	1.99246	2.29762	2.10482	3.7	-0.400425	0.0952721	0.948		99	1	76.643		0.56	5	5.79811	5.05539	4.49211	13.8359	1.5	0.653	-0.0897145	0.948		99	1	76.643		0.43	5	0.283119	0.182943	0.314158	0.311584	1.1	-0.0155193	-0.115696	0.948
1A	100	1	77.643		1.34	6	1.51246	1.98032	2.31911	2.1034	3.8	-0.403324	0.0645359	0.929		100	1	77.643		0.63	5	5.79507	5.09103	4.40967	13.8068	1.7	0.692703	-0.0113372	0.929		100	1	77.643		0.46	6	0.272482	0.181859	0.324773	0.311242	1.2	-0.0261454	-0.116768	0.929
1A	101	1	78.643		1.27	6	1.53792	1.97937	2.31413	2.10888	3.5	-0.388101	0.0533477	0.944		101	1	78.643		0.69	5	5.78604	5.1076	4.36351	13.7901	1.8	0.711265	0.0328252	0.944		101	1	78.643		0.49	5	0.257474	0.18389	0.333245	0.311134	1.3	-0.0378858	-0.111469	0.944
1A	102	1	79.643		1.15	4	1.57513	1.98564	2.2867	2.12039	3	-0.355782	0.0547197	0.992		102	1	79.643		0.72	4	5.76783	5.11132	4.3466	13.7872	1.8	0.710615	0.0541034	0.992		102	1	79.643		0.51	4	0.240166	0.188277	0.33941	0.311141	1.3	-0.0496217	-0.101511	0.992
1A	103	1	79.764	SNP_3574578	1.14	4	1.58048	1.98663	2.2822	2.12207	2.9	-0.350862	0.0552898	1		103	1	79.764	SNP_3574578	0.73	4	5.765	5.11111	4.3462	13.7877	1.8	0.7094	0.0555111	1		103	1	79.764	SNP_3574578	0.51	4	0.238095	0.188889	0.34	0.311143	1.3	-0.0509524	-0.100159	1
1A	104	1	80.764		1.01	4	1.59129	1.99439	2.25952	2.12817	2.6	-0.334115	0.0689826	0.962		104	1	80.764		0.7	4	5.76597	5.10943	4.35195	13.7912	1.8	0.707009	0.0504758	0.962		104	1	80.764		0.69	6	0.24785	0.17594	0.356456	0.309419	1.8	-0.0543029	-0.126213	0.962
1A	105	1	81.764		0.88	4	1.60615	2.00315	2.23089	2.13521	2.3	-0.312369	0.0846301	0.952		105	1	81.764		0.65	5	5.7458	5.11171	4.36795	13.8046	1.7	0.688924	0.0548377	0.952		105	1	81.764		0.85	6	0.253375	0.16698	0.368898	0.307944	2.3	-0.0577611	-0.144157	0.952
1A	106	1	82.764		0.75	4	1.62545	2.01213	2.19753	2.14279	1.9	-0.286042	0.10064	0.97		106	1	82.764		0.6	4	5.70108	5.12022	4.39264	13.8271	1.5	0.654222	0.0733656	0.97		106	1	82.764		0.98	6	0.250647	0.163864	0.376851	0.307134	2.6	-0.0631019	-0.149884	0.97
1A	107	1	83.471	SNP_3574597	0.66	4	1.64195	2.01795	2.17224	2.1482	1.7	-0.265147	0.110856	1		107	1	83.471	SNP_3574597	0.56	4	5.65439	5.13077	4.4142	13.847	1.4	0.620095	0.0964741	1		107	1	83.471	SNP_3574597	1.04	4	0.243902	0.164835	0.38	0.306969	2.6	-0.0680488	-0.147116	1
1A	108	1	84.471		0.57	5	1.65304	2.03036	2.13954	2.15259	1.5	-0.243248	0.134071	0.955		108	1	84.471		0.57	5	5.70652	5.10549	4.41943	13.8352	1.5	0.643545	0.042515	0.955		108	1	84.471		0.95	5	0.238154	0.168402	0.379096	0.307316	2.5	-0.0704714	-0.140223	0.955
1A	109	1	85.471		0.49	5	1.66543	2.04888	2.09475	2.15679	1.3	-0.214659	0.168787	0.923		109	1	85.471		0.58	5	5.75669	5.07741	4.43042	13.8245	1.6	0.663133	-0.0161476	0.923		109	1	85.471		0.85	6	0.231117	0.173216	0.37656	0.30783	2.3	-0.0727215	-0.130622	0.923
1A	110	1	86.471		0.43	6	1.67913	2.07354	2.03764	2.15953	1.2	-0.17925	0.215156	0.903		110	1	86.471		0.58	6	5.80079	5.04885	4.44683	13.8158	1.6	0.676978	-0.0749666	0.903		110	1	86.471		0.75	6	0.222744	0.179446	0.372158	0.308503	2.1	-0.0747066	-0.118005	0.903
1A	111	1	87.471		0.41	8	1.69448	2.1004	1.97469	2.15971	1.2	-0.140106	0.265815	0.895		111	1	87.471		0.59	6	5.83454	5.02248	4.4679	13.8109	1.7	0.683317	-0.128736	0.895		111	1	87.471		0.65	6	0.21322	0.187151	0.365699	0.309299	1.9	-0.0762398	-0.102309	0.895
1A	112	1	88.471		0.41	7	1.71223	2.12213	1.91849	2.15813	1.2	-0.103131	0.306772	0.9		112	1	88.471		0.59	6	5.85467	5.0006	4.49268	13.8112	1.7	0.680996	-0.173077	0.9		112	1	88.471		0.56	6	0.203081	0.196181	0.357124	0.310158	1.6	-0.0770213	-0.0839214	0.9
1A	113	1	89.471		0.43	7	1.73299	2.13494	1.87578	2.15675	1.3	-0.0713965	0.330551	0.917		113	1	89.471		0.58	6	5.85943	4.98467	4.52022	13.8176	1.6	0.669605	-0.20515	0.917		113	1	89.471		0.47	6	0.193143	0.206119	0.346643	0.310999	1.3	-0.0767497	-0.0637742	0.917
1A	114	1	90.471		0.45	6	1.75683	2.13934	1.84588	2.15664	1.3	-0.0445258	0.337989	0.946		114	1	90.471		0.57	5	5.84872	4.97516	4.54973	13.8302	1.5	0.649496	-0.224059	0.946		114	1	90.471		0.41	5	0.18418	0.216311	0.334892	0.311739	1.1	-0.075356	-0.0432249	0.946
1A	115	1	91.471		0.48	4	1.78324	2.13742	1.82565	2.15783	1.3	-0.0212063	0.332975	0.988		115	1	91.471		0.55	4	5.8241	4.97154	4.58066	13.848	1.4	0.621724	-0.230843	0.988		115	1	91.471		0.36	4	0.176624	0.226025	0.32287	0.312313	0.9	-0.0731227	-0.0237218	0.988
1A	116	1	91.716	SNP_2256752	0.48	4	1.79	2.13622	1.82184	2.15827	1.2	-0.0159184	0.330304	1		116	1	91.716	SNP_2256752	0.54	4	5.81625	4.97141	4.5884	13.8529	1.4	0.613925	-0.230912	1		116	1	91.716	SNP_2256752	0.35	4	0.175	0.228261	0.32	0.312426	0.9	-0.0725	-0.0192391	1
1A	117	1	92.716		0.49	4	1.77347	2.14072	1.83753	2.15718	1.3	-0.0320278	0.335217	0.978		117	1	92.716		0.51	5	5.82107	4.88818	4.69363	13.8587	1.3	0.563724	-0.369172	0.978		117	1	92.716		0.42	4	0.165952	0.230816	0.327599	0.31181	1.1	-0.0808231	-0.0159594	0.978
1A	118	1	93.586	SNP_3574682	0.49	4	1.76465	2.13864	1.8566	2.15774	1.3	-0.0459723	0.328013	1		118	1	93.586	SNP_3574682	0.47	4	5.77159	4.83744	4.79417	13.8781	1.2	0.488712	-0.445434	1		118	1	93.586	SNP_3574682	0.49	4	0.159091	0.233333	0.333333	0.31128	1.2	-0.0871212	-0.0128788	1
1A	119	1	94.586		0.61	6	1.77522	2.16835	1.78129	2.14734	1.7	-0.00303432	0.39009	0.968		119	1	94.586		0.55	4	5.83393	4.83287	4.73737	13.8455	1.4	0.548284	-0.452776	0.968		119	1	94.586		0.45	5	0.164357	0.231482	0.334956	0.311432	1.2	-0.0852994	-0.0181747	0.968
1A	120	1	95.586		0.7	6	1.79054	2.17882	1.73637	2.14186	2	0.0270846	0.415369	0.966		120	1	95.586		0.63	4	5.88001	4.83456	4.67921	13.8171	1.6	0.6004	-0.445054	0.966		120	1	95.586		0.39	5	0.170377	0.232139	0.331072	0.311885	1	-0.0803475	-0.018585	0.966
1A	121	1	96.586		0.74	4	1.81041	2.17226	1.72192	2.1433	1.9	0.0442425	0.406089	0.995		121	1	96.586		0.7	4	5.90812	4.83803	4.62986	13.796	1.8	0.639128	-0.430955	0.995		121	1	96.586		0.32	4	0.177034	0.236011	0.319756	0.312651	0.8	-0.071361	-0.0123848	0.995
1A	122	1	96.692	SNP_3020322	0.74	4	1.81273	2.17088	1.72163	2.14374	1.9	0.0455497	0.403702	1		122	1	96.692	SNP_3020322	0.71	4	5.91	4.83839	4.62545	13.7943	1.8	0.642273	-0.42934	1		122	1	96.692	SNP_3020322	0.31	4	0.177778	0.236559	0.318182	0.312741	0.8	-0.070202	-0.0114207	1
1A	123	1	97.692		0.53	4	1.80421	2.14922	1.7964	2.15493	1.4	0.00390548	0.348916	0.993		123	1	97.692		0.6	4	5.83359	4.85678	4.6545	13.8312	1.5	0.589544	-0.387271	0.993		123	1	97.692		0.67	5	0.174471	0.213043	0.365824	0.309757	1.7	-0.0956764	-0.0571045	0.993
1A	124	1	97.869	SNP_1042992	0.5	4	1.80289	2.14261	1.81467	2.1575	1.3	-0.00588889	0.333836	1		124	1	97.869	SNP_1042992	0.58	4	5.8163	4.86078	4.6613	13.8393	1.5	0.5775	-0.378027	1		124	1	97.869	SNP_1042992	0.73	4	0.173913	0.211111	0.369565	0.309423	1.8	-0.0978261	-0.060628	1
1A	125	1	98.869		0.49	5	1.79687	2.14824	1.80982	2.15562	1.4	-0.00647586	0.344899	0.954		125	1	98.869		0.59	5	5.85561	4.84556	4.64978	13.8182	1.6	0.602916	-0.407132	0.954		125	1	98.869		0.72	5	0.171926	0.211095	0.371758	0.309213	1.9	-0.0999163	-0.0607463	0.954
1A	126	1	99.869		0.48	6	1.79154	2.15356	1.80502	2.1538	1.4	-0.00674113	0.355285	0.912		126	1	99.869		0.6	6	5.89507	4.83027	4.63792	13.7958	1.8	0.628575	-0.436226	0.912		126	1	99.869		0.7	6	0.169893	0.211283	0.373594	0.309027	2	-0.10185	-0.0604603	0.912
1A	127	1	100.869		0.46	7	1.78706	2.15846	1.8003	2.15209	1.5	-0.00661766	0.364779	0.873		127	1	100.869		0.6	7	5.93361	4.81546	4.6257	13.7726	1.9	0.653956	-0.464191	0.873		127	1	100.869		0.69	7	0.167828	0.211695	0.375016	0.30887	2	-0.103594	-0.0597267	0.873
1A	128	1	101.869		0.45	8	1.78364	2.16282	1.79571	2.15055	1.6	-0.00603486	0.373142	0.838		128	1	101.869		0.6	8	5.96979	4.80192	4.61305	13.7496	2.1	0.678372	-0.489502	0.838		128	1	101.869		0.67	7	0.165742	0.212354	0.375963	0.308747	2	-0.10511	-0.0584986	0.838
1A	129	1	102.869		0.43	8	1.7815	2.16647	1.79131	2.14925	1.7	-0.00490694	0.380069	0.806		129	1	102.869		0.6	10	6.00204	4.7905	4.59991	13.728	2.2	0.701065	-0.510469	0.806		129	1	102.869		0.65	8	0.163669	0.213267	0.376392	0.308663	2.1	-0.106362	-0.0567631	0.806
1A	130	1	103.869		0.42	9	1.78079	2.16933	1.78715	2.14825	1.7	-0.00318271	0.385359	0.777		130	1	103.869		0.6	11	6.02785	4.78263	4.58609	13.7095	2.4	0.720884	-0.52434	0.777		130	1	103.869		0.63	9	0.16163	0.21445	0.376244	0.308623	2.1	-0.107307	-0.0544871	0.777
1A	131	1	104.869		0.4	10	1.78177	2.1712	1.78331	2.14762	1.7	-0.000771862	0.388661	0.752		131	1	104.869		0.59	12	6.04507	4.77955	4.57144	13.6959	2.5	0.736815	-0.528714	0.752		131	1	104.869		0.61	9	0.159652	0.21592	0.375463	0.30863	2.1	-0.107906	-0.0516377	0.752
1A	132	1	105.869		0.38	11	1.78468	2.17192	1.77987	2.14743	1.7	0.00240672	0.389645	0.73		132	1	105.869		0.57	13	6.05134	4.78264	4.55581	13.6891	2.5	0.747765	-0.520936	0.73		132	1	105.869		0.59	10	0.157786	0.217663	0.374027	0.308686	2.1	-0.10812	-0.0482437	0.73
1A	133	1	106.869		0.35	11	1.78985	2.17125	1.77692	2.14776	1.7	0.00646389	0.387862	0.711		133	1	106.869		0.55	14	6.04444	4.79322	4.539	13.6905	2.5	0.752719	-0.498501	0.711		133	1	106.869		0.57	10	0.156052	0.219701	0.371878	0.308794	2	-0.107913	-0.044264	0.711
1A	134	1	107.869		0.33	12	1.7974	2.1691	1.77454	2.14864	1.7	0.0114317	0.38313	0.695		134	1	107.869		0.52	14	6.02218	4.81266	4.52083	13.7011	2.4	0.750676	-0.458846	0.695		134	1	107.869		0.54	10	0.154497	0.222021	0.369005	0.308953	2	-0.107254	-0.03973	0.695
1A	135	1	108.869		0.31	13	1.80766	2.1652	1.77281	2.15011	1.6	0.0174244	0.374965	0.682		135	1	108.869		0.5	15	5.98409	4.8413	4.50133	13.7202	2.3	0.741379	-0.401405	0.682		135	1	108.869		0.51	11	0.153178	0.224588	0.365424	0.309159	1.9	-0.106123	-0.0347128	0.682
1A	136	1	109.869		0.28	13	1.82099	2.15931	1.77188	2.1522	1.5	0.0245564	0.362872	0.673		136	1	109.869		0.47	15	5.92893	4.88003	4.4804	13.7468	2.1	0.724269	-0.324638	0.673		136	1	109.869		0.49	11	0.152103	0.227415	0.361111	0.309409	1.8	-0.104504	-0.0291917	0.673
1A	137	1	110.869		0.26	14	1.83736	2.15139	1.77176	2.15482	1.4	0.0327965	0.346829	0.666		137	1	110.869		0.44	15	5.85784	4.92829	4.45823	13.7778	1.9	0.699803	-0.229745	0.666		137	1	110.869		0.46	11	0.151329	0.230449	0.356123	0.309696	1.7	-0.102397	-0.0232767	0.666
1A	138	1	111.869		0.23	14	1.85701	2.14121	1.77258	2.15791	1.3	0.0422178	0.326416	0.663		138	1	111.869		0.41	15	5.77289	4.98498	4.43514	13.8093	1.7	0.668875	-0.119039	0.663		138	1	111.869		0.43	11	0.150898	0.233635	0.350532	0.310011	1.6	-0.0998166	-0.0170797	0.663
1A	139	1	112.869		0.21	14	1.87961	2.12893	1.77431	2.16126	1.1	0.0526503	0.301976	0.662		139	1	112.869		0.39	15	5.67765	5.04807	4.41162	13.8371	1.5	0.633016	0.00343438	0.662		139	1	112.869		0.41	10	0.150847	0.236914	0.344423	0.310345	1.5	-0.0967879	-0.0107209	0.662
1A	140	1	113.869		0.19	14	1.90448	2.11489	1.77689	2.16461	0.9	0.0637963	0.274205	0.665		140	1	113.869		0.38	13	5.57627	5.11512	4.3882	13.8576	1.3	0.594033	0.132886	0.665		140	1	113.869		0.38	9	0.151249	0.240167	0.337955	0.310688	1.4	-0.093353	-0.00443452	0.665
1A	141	1	114.869		0.18	14	1.93055	2.09969	1.78018	2.16768	0.8	0.0751821	0.244323	0.671		141	1	114.869		0.37	11	5.47557	5.18195	4.36594	13.8685	1.2	0.554816	0.2612	0.671		141	1	114.869		0.35	8	0.152173	0.243269	0.331298	0.311034	1.3	-0.0895627	0.00153357	0.671
1A	142	1	115.869		0.16	13	1.95654	2.08406	1.78402	2.17025	0.7	0.0862613	0.213788	0.68		142	1	115.869		0.37	7	5.38212	5.24434	4.34598	13.87	1.2	0.518071	0.380289	0.68		142	1	115.869		0.33	9	0.153606	0.246145	0.324603	0.311375	1.2	-0.0854986	0.00704032	0.68
1A	143	1	116.869		0.15	12	1.98098	2.06895	1.78814	2.17221	0.6	0.0964187	0.184388	0.692		143	1	116.869		0.38	11	5.29612	5.30221	4.3283	13.864	1.3	0.483913	0.489999	0.692		143	1	116.869		0.3	10	0.155592	0.248705	0.317988	0.311709	1.1	-0.0811983	0.0119144	0.692
1A	144	1	117.869		0.15	11	2.00289	2.05498	1.79238	2.17357	0.5	0.105254	0.157349	0.708		144	1	117.869		0.4	11	5.22231	5.35225	4.31407	13.8534	1.4	0.454119	0.584052	0.708		144	1	117.869		0.28	10	0.158166	0.250833	0.311626	0.312034	1	-0.0767301	0.0159369	0.708
1A	145	1	118.869		0.14	9	2.02186	2.04245	1.79663	2.17445	0.5	0.112612	0.133211	0.726		145	1	118.869		0.42	11	5.1609	5.39411	4.3036	13.841	1.4	0.428649	0.661859	0.726		145	1	118.869		0.25	10	0.161291	0.252495	0.305604	0.31235	0.9	-0.0721561	0.0190474	0.726
1A	146	1	119.869		0.14	8	2.03762	2.03162	1.80079	2.17499	0.5	0.118416	0.112419	0.748		146	1	119.869		0.44	10	5.11185	5.42752	4.29721	13.8292	1.5	0.40732	0.722992	0.748		146	1	119.869		0.23	9	0.164923	0.25367	0.299989	0.312656	0.8	-0.0675328	0.0212134	0.748
1A	147	1	120.869		0.14	7	2.05047	2.02233	1.80485	2.1753	0.5	0.122812	0.0946718	0.773		147	1	120.869		0.47	10	5.07349	5.45332	4.29486	13.8195	1.6	0.389313	0.769146	0.773		147	1	120.869		0.21	9	0.168943	0.254415	0.294779	0.312948	0.7	-0.0629178	0.0225547	0.773
1A	148	1	121.869		0.15	6	2.06074	2.01445	1.80883	2.17549	0.5	0.125958	0.0796645	0.801		148	1	121.869		0.49	9	5.04484	5.47187	4.29667	13.8131	1.6	0.374085	0.801119	0.801		148	1	121.869		0.19	8	0.173263	0.254763	0.289988	0.313225	0.6	-0.0583625	0.0231379	0.801
1A	149	1	122.869		0.15	6	2.06876	2.0078	1.81271	2.17562	0.4	0.128025	0.0670627	0.832		149	1	122.869		0.52	8	5.02411	5.48416	4.30247	13.8102	1.7	0.36082	0.820865	0.832		149	1	122.869		0.17	7	0.177751	0.254796	0.285586	0.313483	0.5	-0.0539175	0.0231277	0.832
1A	150	1	123.869		0.15	5	2.07491	2.00217	1.81654	2.17574	0.4	0.129186	0.0564473	0.867		150	1	123.869		0.54	7	5.00981	5.49099	4.31212	13.8109	1.7	0.348849	0.830024	0.867		150	1	123.869		0.16	6	0.182294	0.254588	0.281547	0.31372	0.5	-0.0496265	0.0226671	0.867
1A	151	1	124.869		0.16	5	2.07949	1.99743	1.82031	2.17586	0.4	0.12959	0.047533	0.905		151	1	124.869		0.56	6	5.0006	5.49315	4.3254	13.8149	1.6	0.337599	0.830148	0.905		151	1	124.869		0.14	6	0.186789	0.254207	0.27784	0.313933	0.4	-0.0455253	0.0218923	0.905
1A	152	1	125.869		0.16	4	2.08274	1.99342	1.82402	2.17599	0.4	0.129363	0.0400418	0.947		152	1	125.869		0.58	5	4.9953	5.49135	4.3421	13.8217	1.6	0.3266	0.822655	0.947		152	1	125.869		0.12	5	0.19117	0.253701	0.274447	0.314122	0.3	-0.0416382	0.0208922	0.947
1A	153	1	126.869		0.16	4	2.08492	1.99003	1.82767	2.17615	0.4	0.128623	0.0337369	0.992		153	1	126.869		0.6	4	4.99292	5.48623	4.36192	13.831	1.5	0.315499	0.808811	0.992		153	1	126.869		0.11	4	0.195376	0.253118	0.27134	0.314288	0.3	-0.0379823	0.0197595	0.992
1A	154	1	127.041	SNP_1092591	0.16	4	2.0852	1.98951	1.8283	2.17618	0.4	0.128451	0.0327572	1		154	1	127.041	SNP_1092591	0.6	4	4.99275	5.48506	4.36563	13.8328	1.5	0.31356	0.805875	1		154	1	127.041	SNP_1092591	0.11	4	0.196078	0.253012	0.270833	0.314314	0.3	-0.0373775	0.0195562	1
1A	155	1	128.041		0.15	5	2.05821	2.01438	1.81138	2.17567	0.4	0.123414	0.0795912	0.966		155	1	128.041		0.48	5	4.98645	5.45992	4.42762	13.8649	1.3	0.279413	0.75289	0.966		155	1	128.041		0.12	4	0.202749	0.241103	0.285541	0.31424	0.3	-0.0413959	-0.00304232	0.966
1A	156	1	128.681	SNP_2298023	0.13	4	2.04078	2.01496	1.82909	2.17782	0.3	0.105843	0.0800219	0.998		156	1	128.681	SNP_2298023	0.38	4	4.99452	5.40671	4.51069	13.9096	1	0.241915	0.654108	0.998		156	1	128.681	SNP_2298023	0.14	4	0.207546	0.23356	0.293808	0.314099	0.3	-0.0431305	-0.017117	0.998
1A	157	1	129.681		0.21	6	2.09822	1.99613	1.79549	2.17251	0.6	0.151364	0.0492826	0.947		157	1	129.681		0.33	5	5.06338	5.36785	4.48943	13.916	0.9	0.286971	0.591449	0.947		157	1	129.681		0.21	5	0.180215	0.251915	0.292059	0.313397	0.6	-0.0559218	0.0157779	0.947
1A	158	1	130.681		0.31	6	2.15172	1.97408	1.77486	2.16631	0.9	0.188431	0.0107973	0.942		158	1	130.681		0.3	5	5.1231	5.32234	4.4913	13.9276	0.8	0.315903	0.515145	0.942		158	1	130.681		0.31	5	0.164947	0.258958	0.295725	0.312632	0.8	-0.0653892	0.028622	0.942
1A	159	1	131.681		0.42	4	2.19205	1.95351	1.76848	2.16111	1.1	0.211782	-0.0267516	0.985		159	1	131.681		0.27	4	5.16757	5.27371	4.51671	13.9443	0.7	0.325431	0.431566	0.985		159	1	131.681		0.38	4	0.157759	0.259209	0.302733	0.312117	1	-0.0724868	0.028963	0.985
1A	160	1	131.894	SNP_3574713	0.45	4	2.1988	1.94952	1.76867	2.16024	1.2	0.215068	-0.0342168	1		160	1	131.894	SNP_3574713	0.27	4	5.17513	5.26316	4.52478	13.9483	0.7	0.325171	0.413206	1		160	1	131.894	SNP_3574713	0.4	4	0.156864	0.258822	0.304348	0.312034	1	-0.0737419	0.0282164	1
1A	161	1	132.57	SNP_1178799	0.41	4	2.1988	1.93273	1.783	2.16214	1.1	0.2079	-0.0581727	1		161	1	132.57	SNP_1178799	0.07	4	5.1751	5.11189	4.76683	14.0193	0.2	0.204134	0.140925	1		161	1	132.57	SNP_1178799	0.37	4	0.156863	0.266667	0.292683	0.312269	0.9	-0.0679101	0.0418938	1
1A	162	1	132.973	SNP_3574515	0.61	4	2.2683	1.91089	1.77439	2.15131	1.6	0.246954	-0.110455	1		162	1	132.973	SNP_3574515	0.09	4	4.94437	5.21815	4.81048	14.0131	0.2	0.0669494	0.340727	1		162	1	132.973	SNP_3574515	0.27	4	0.166667	0.26087	0.285714	0.313062	0.7	-0.0595238	0.0346791	1
1A	163	1	133.973		0.32	6	2.15225	1.97831	1.75511	2.16597	0.9	0.198568	0.0246236	0.964		163	1	133.973		0.06	4	5.24615	5.05282	4.8243	14.0217	0.2	0.210924	0.0175972	0.964		163	1	133.973		0.42	5	0.143007	0.272664	0.28825	0.311609	1.1	-0.0726211	0.0570355	0.964
1A	164	1	134.973		0.29	5	1.98999	2.06985	1.73941	2.16822	0.8	0.125291	0.205146	0.968		164	1	134.973		0.24	5	5.5557	4.87926	4.84169	13.9506	0.7	0.357007	-0.319436	0.968		164	1	134.973		0.56	5	0.128808	0.279713	0.290721	0.310488	1.5	-0.0809569	0.0699489	0.968
1A	165	1	135.765	SNP_3574178	0.46	4	1.89375	2.12356	1.733	2.15927	1.2	0.080375	0.310181	1		165	1	135.765	SNP_3574178	0.5	4	5.73939	4.77359	4.85463	13.8684	1.2	0.442377	-0.523424	1		165	1	135.765	SNP_3574178	0.67	4	0.122449	0.282609	0.292683	0.309919	1.7	-0.085117	0.0750427	1
1A	166	1	136.765		0.27	5	1.89038	2.10047	1.8069	2.16891	0.8	0.0417395	0.251824	0.959		166	1	136.765		0.33	5	5.62762	4.81261	4.90681	13.9223	0.9	0.360408	-0.454608	0.959		166	1	136.765		0.67	5	0.118195	0.276048	0.306908	0.309532	1.8	-0.0943563	0.0634962	0.959
1A	167	1	137.765		0.13	4	1.88941	2.06504	1.89298	2.17783	0.3	-0.00178454	0.173847	0.975		167	1	137.765		0.19	4	5.48964	4.85133	4.97469	13.9724	0.5	0.257476	-0.380834	0.975		167	1	137.765		0.59	5	0.133225	0.257906	0.321951	0.310277	1.6	-0.094363	0.030318	0.975
1A	168	1	138.218	SNP_2276278	0.09	4	1.88936	2.04747	1.92917	2.18042	0.2	-0.0199025	0.138206	1		168	1	138.218	SNP_2276278	0.15	4	5.42563	4.86635	5.00755	13.9902	0.4	0.209037	-0.350235	1		168	1	138.218	SNP_2276278	0.55	4	0.145833	0.247059	0.326531	0.310805	1.4	-0.0903486	0.0108769	1
1A	169	1	138.754	SNP_3574818	0.05	4	1.92609	2.02852	1.91432	2.18243	0.1	0.00588439	0.10832	1		169	1	138.754	SNP_3574818	0.5	4	5.75383	4.74156	4.93933	13.8656	1.3	0.407248	-0.605026	1		169	1	138.754	SNP_3574818	0.81	4	0.106383	0.288889	0.288889	0.308799	2	-0.091253	0.091253	1
1A	170	1	139.754		0.01	4	1.95554	2.00115	1.9443	2.18471	0	0.00562144	0.0512234	0.992		170	1	139.754		0.43	4	5.68799	4.76658	4.89798	13.8893	1.1	0.395006	-0.526404	0.992		170	1	139.754		0.97	4	0.100728	0.306749	0.273098	0.307531	2.4	-0.0861849	0.119836	0.992
1A	171	1	139.912	SNP_1024054	0.01	3	1.9602	1.99549	1.95021	2.18496	0	0.00499566	0.0402794	1		171	1	139.912	SNP_1024054	0.42	4	5.6706	4.77548	4.89104	13.8964	1	0.389779	-0.505345	1		171	1	139.912	SNP_1024054	1	4	0.1	0.309524	0.270833	0.307316	2.5	-0.0854167	0.124107	1
1A	172	1	140.912		0.02	5	1.92541	2.01004	1.9594	2.18407	0.1	-0.0169966	0.067628	0.96		172	1	140.912		0.38	5	5.65	4.7442	4.98463	13.9015	1	0.332685	-0.573115	0.96		172	1	140.912		0.93	5	0.103197	0.309931	0.263978	0.307672	2.4	-0.0803908	0.126344	0.96
1A	173	1	141.912		0.05	6	1.88783	2.02414	1.97065	2.1822	0.1	-0.0414102	0.0948956	0.935		173	1	141.912		0.36	5	5.61913	4.71401	5.08671	13.9037	1	0.266209	-0.638913	0.935		173	1	141.912		0.87	5	0.106963	0.309957	0.257111	0.30806	2.3	-0.0750738	0.12792	0.935
1A	174	1	142.912		0.08	6	1.85321	2.03457	1.98419	2.17976	0.3	-0.0654903	0.11587	0.926		174	1	142.912		0.35	5	5.57766	4.68786	5.19133	13.9028	1	0.193164	-0.696635	0.926		174	1	142.912		0.81	5	0.111376	0.309424	0.250592	0.30849	2.1	-0.0696081	0.12844	0.926
1A	175	1	143.912		0.12	6	1.82625	2.03912	2.00009	2.1775	0.4	-0.0869203	0.125942	0.933		175	1	143.912		0.36	5	5.52612	4.66843	5.29199	13.8996	1	0.117065	-0.740615	0.933		175	1	143.912		0.75	5	0.116513	0.30823	0.244661	0.308969	2	-0.0640739	0.127643	0.933
1A	176	1	144.912		0.15	5	1.80813	2.0377	2.01803	2.17586	0.4	-0.104949	0.124625	0.955		176	1	144.912		0.39	5	5.46602	4.65722	5.38352	13.8957	1.1	0.0412533	-0.767554	0.955		176	1	144.912		0.7	5	0.122438	0.306358	0.239403	0.309499	1.8	-0.0584825	0.125438	0.955
1A	177	1	145.912		0.18	4	1.79763	2.03164	2.03724	2.17484	0.5	-0.119801	0.11421	0.992		177	1	145.912		0.42	4	5.39982	4.65424	5.46297	13.8921	1.1	-0.0315746	-0.777155	0.992		177	1	145.912		0.64	4	0.129174	0.303864	0.23479	0.310072	1.6	-0.0528076	0.121882	0.992
1A	178	1	146.087	SNP_3574238	0.19	4	1.79644	2.03023	2.04065	2.17471	0.5	-0.122104	0.111682	1		178	1	146.087	SNP_3574238	0.43	4	5.38783	4.65449	5.47553	13.8915	1.1	-0.0438529	-0.777185	1		178	1	146.087	SNP_3574238	0.63	4	0.130435	0.303371	0.234043	0.310175	1.6	-0.0518039	0.121132	1
1A	179	1	146.853	SNP_3575262	0.26	4	1.76739	2.04448	2.04822	2.17052	0.7	-0.140415	0.136676	1		179	1	146.853	SNP_3575262	0.52	4	5.38809	4.61966	5.54457	13.8617	1.3	-0.0782401	-0.846662	1		179	1	146.853	SNP_3575262	0.66	4	0.12766	0.303371	0.23913	0.309959	1.7	-0.0557354	0.119976	1
1A	180	1	147.358	SNP_3574950	0.22	4	1.78826	2.0282	2.05977	2.17321	0.6	-0.135753	0.104188	1		180	1	147.358	SNP_3574950	0.9	4	5.60085	4.49066	5.62614	13.7286	2.2	-0.0126426	-1.12283	1		180	1	147.358	SNP_3574950	0.84	4	0.12766	0.318681	0.204545	0.308524	2.1	-0.0384429	0.152579	1
1A	181	1	148.358		0.78	5	1.59254	2.09837	2.09533	2.13827	2.2	-0.251395	0.254436	0.973		181	1	148.358		0.62	5	5.59459	4.56682	5.48019	13.8069	1.7	0.0571996	-0.970574	0.973		181	1	148.358		0.62	5	0.133342	0.305755	0.221422	0.310123	1.6	-0.04404	0.128373	0.973
1A	182	1	148.764	SNP_3574928	1.03	4	1.54977	2.10888	2.10891	2.1281	2.6	-0.279573	0.279536	1		182	1	148.764	SNP_3574928	0.48	4	5.55091	4.64549	5.37149	13.8744	1.2	0.0897099	-0.815705	1		182	1	148.764	SNP_3574928	0.53	4	0.136364	0.296703	0.234043	0.310969	1.3	-0.0488395	0.1115	1
1A	183	1	149.764		1.03	4	1.55696	2.10068	2.13776	2.12676	2.7	-0.2904	0.253323	0.944		183	1	149.764		0.62	6	5.64714	4.53089	5.43682	13.7843	1.8	0.105158	-1.01109	0.944		183	1	149.764		0.51	7	0.14501	0.30595	0.214541	0.310648	1.4	-0.0347655	0.126175	0.944
1A	184	1	150.764		1.04	5	1.56773	2.08735	2.16706	2.12621	2.7	-0.299666	0.219958	0.927		184	1	150.764		0.71	7	5.69758	4.45695	5.45903	13.7251	2.3	0.119275	-1.12136	0.927		184	1	150.764		0.47	7	0.156084	0.310197	0.203014	0.310677	1.4	-0.023465	0.130648	0.927
1A	185	1	151.764		1.04	5	1.58126	2.07306	2.19029	2.12639	2.7	-0.304515	0.187287	0.949		185	1	151.764		0.7	6	5.6786	4.46321	5.41453	13.7453	2.1	0.132032	-1.08336	0.949		185	1	151.764		0.4	6	0.170086	0.305581	0.204287	0.311569	1.1	-0.0171003	0.118394	0.949
1A	186	1	152.631	SNP_1343836	1.04	4	1.59469	2.06231	2.20275	2.12736	2.7	-0.304026	0.163588	1		186	1	152.631	SNP_1343836	0.63	4	5.60286	4.53877	5.33192	13.8223	1.6	0.135467	-0.928625	1		186	1	152.631	SNP_1343836	0.31	4	0.183673	0.296296	0.211538	0.312686	0.8	-0.0139325	0.0986903	1
1A	187	1	153.631		0.84	4	1.60895	2.08023	2.14158	2.13812	2.2	-0.266313	0.204969	0.976		187	1	153.631		0.3	5	5.46215	4.71737	5.28111	13.9327	0.8	0.0905197	-0.654258	0.976		187	1	153.631		0.62	5	0.16093	0.314951	0.181676	0.309974	1.7	-0.010373	0.143648	0.976
1A	188	1	153.997	SNP_3574656	0.77	4	1.61711	2.08685	2.11	2.14223	2	-0.246444	0.223298	1		188	1	153.997	SNP_3574656	0.19	4	5.37644	4.80043	5.24133	13.9767	0.5	0.0675556	-0.508454	1		188	1	153.997	SNP_3574656	0.71	4	0.155556	0.315217	0.177778	0.309602	1.8	-0.0111111	0.148551	1
1A	189	1	154.38	SNP_3574895	0.88	4	1.60426	2.08943	2.14116	2.13594	2.3	-0.268454	0.216723	1		189	1	154.38	SNP_3574895	0.3	4	5.42213	4.72901	5.32409	13.9382	0.8	0.0490184	-0.644098	1		189	1	154.38	SNP_3574895	0.77	4	0.148936	0.318681	0.181818	0.309127	1.9	-0.016441	0.153304	1
1A	190	1	155.38		0.87	4	1.59736	2.08204	2.1481	2.13583	2.3	-0.275371	0.209309	0.962		190	1	155.38		0.41	5	5.5001	4.66477	5.39854	13.8882	1.1	0.0507819	-0.784547	0.962		190	1	155.38		0.58	5	0.156345	0.309301	0.189388	0.310373	1.5	-0.0165217	0.136435	0.962
1A	191	1	156.38		0.85	5	1.59346	2.07357	2.15442	2.13644	2.2	-0.280481	0.199631	0.942		191	1	156.38		0.53	5	5.56858	4.61162	5.4648	13.8377	1.5	0.0518915	-0.905071	0.942		191	1	156.38		0.41	5	0.165184	0.298303	0.199622	0.311681	1.1	-0.0172192	0.1159	0.942
1A	192	1	157.38		0.83	5	1.59276	2.06434	2.15944	2.13778	2.2	-0.283337	0.188241	0.94		192	1	157.38		0.64	5	5.61895	4.57425	5.51856	13.7961	1.8	0.050197	-0.9945	0.94		192	1	157.38		0.26	5	0.175405	0.285891	0.212498	0.312922	0.7	-0.0185462	0.0919399	0.94
1A	193	1	158.38		0.8	4	1.59541	2.05465	2.16253	2.13985	2.1	-0.283564	0.175684	0.957		193	1	158.38		0.72	5	5.64488	4.55538	5.55703	13.771	1.9	0.0439257	-1.04557	0.957		193	1	158.38		0.15	5	0.186734	0.272923	0.226635	0.313924	0.4	-0.0199501	0.0662384	0.957
1A	194	1	159.38		0.76	4	1.60146	2.04477	2.16332	2.14262	2	-0.280928	0.16238	0.993		194	1	159.38		0.78	4	5.64269	4.55582	5.57892	13.7669	2	0.0318845	-1.05499	0.993		194	1	159.38		0.08	4	0.198687	0.26074	0.239649	0.314578	0.2	-0.0204811	0.0415727	0.993
1A	195	1	159.476	SNP_3574383	0.76	4	1.60222	2.04382	2.16326	2.14292	1.9	-0.280521	0.161074	0.997		195	1	159.476	SNP_3574383	0.78	4	5.64096	4.55685	5.58014	13.7676	2	0.0304095	-1.0537	0.997		195	1	159.476	SNP_3574383	0.07	4	0.199847	0.259654	0.240768	0.314623	0.2	-0.0204606	0.0393465	0.997
1A	196	1	160.476		0.88	4	1.58626	2.09472	2.10947	2.13632	2.2	-0.261604	0.246856	0.99		196	1	160.476		0.85	4	5.6402	4.46762	5.51406	13.738	2.2	0.0630688	-1.1095	0.99		196	1	160.476		0.23	4	0.182741	0.23605	0.300185	0.31334	0.6	-0.0587221	-0.00541305	0.99
1A	197	1	160.537	SNP_3574520	0.89	4	1.58568	2.09807	2.10647	2.13589	2.3	-0.260393	0.252	1		197	1	160.537	SNP_3574520	0.84	4	5.63273	4.47234	5.49907	13.7469	2.1	0.0668262	-1.09356	1		197	1	160.537	SNP_3574520	0.24	4	0.181818	0.235296	0.301884	0.313238	0.6	-0.060033	-0.00655529	1
1A	198	1	161.537		0.95	4	1.5354	2.0821	2.12345	2.13207	2.4	-0.294021	0.252673	0.987		198	1	161.537		0.83	5	5.68944	4.55411	5.62361	13.7432	2.1	0.0329104	-1.10241	0.987		198	1	161.537		0.11	4	0.183639	0.255983	0.260446	0.31427	0.3	-0.0384032	0.0339402	0.987
1A	199	1	161.624	SNP_1091861	0.95	4	1.53421	2.07959	2.12476	2.13258	2.4	-0.295276	0.250106	1		199	1	161.624	SNP_1091861	0.8	4	5.67526	4.57663	5.61721	13.7616	2	0.0290269	-1.0696	1		199	1	161.624	SNP_1091861	0.11	4	0.184211	0.257426	0.255814	0.314305	0.3	-0.0358017	0.0374135	1
1A	200	1	162.28	SNP_3022649	0.82	4	1.5931	2.0683	2.14417	2.13968	2.1	-0.275538	0.199664	0.997		200	1	162.28	SNP_3022649	0.98	4	5.72714	4.49958	5.62906	13.697	2.5	0.0490392	-1.17852	0.997		200	1	162.28	SNP_3022649	0.1	4	0.190476	0.258821	0.253408	0.314386	0.3	-0.031466	0.0368793	0.997
1A	201	1	163.235	SNP_3574169	0.32	4	1.74047	2.03	2.08698	2.16749	0.8	-0.173256	0.116279	1		201	1	163.235	SNP_3574169	0.89	4	5.62651	4.51021	5.63422	13.7302	2.2	-0.0038553	-1.12015	1		201	1	163.235	SNP_3574169	0.13	4	0.186047	0.265957	0.244444	0.314142	0.3	-0.029199	0.050712	1
1A	202	1	164.235		0.23	4	1.7803	1.99898	2.10341	2.17224	0.6	-0.161554	0.0571193	0.976		202	1	164.235		0.96	5	5.63061	4.48735	5.71061	13.6926	2.5	-0.0399965	-1.18326	0.976		202	1	164.235		0.1	4	0.19383	0.248192	0.272026	0.31441	0.2	-0.039098	0.0152643	0.976
1A	203	1	164.926	SNP_3574563	0.19	4	1.813	1.9767	2.11386	2.17471	0.5	-0.150432	0.0132703	1		203	1	164.926	SNP_3574563	0.93	4	5.576	4.51814	5.73644	13.7155	2.3	-0.0802222	-1.13808	1		203	1	164.926	SNP_3574563	0.12	4	0.2	0.237113	0.288889	0.314235	0.3	-0.0444444	-0.00733104	1
1A	204	1	165.376	SNP_3575018	0.17	4	1.81098	1.99096	2.09163	2.17576	0.4	-0.140326	0.0396557	1		204	1	165.376	SNP_3575018	1.51	4	5.73268	4.36729	5.892	13.5175	3.7	-0.0796585	-1.44505	1		204	1	165.376	SNP_3575018	0.13	4	0.195122	0.239583	0.288889	0.314138	0.3	-0.0468835	-0.00242209	1
1A	205	1	166.149	SNP_3574294	0.12	4	1.84512	1.97862	2.08605	2.1785	0.3	-0.120462	0.0130328	1		205	1	166.149	SNP_3574294	1.14	4	5.75463	4.448	5.67261	13.6446	2.8	0.0410127	-1.26562	1		205	1	166.149	SNP_3574294	0.09	4	0.195122	0.263158	0.23913	0.314449	0.2	-0.0220042	0.0460317	1
1A	206	1	167.093	SNP_1051596	0.1	4	1.8769	1.96362	2.09357	2.17972	0.3	-0.108333	-0.0216211	1		206	1	167.093	SNP_1051596	0.48	4	5.24857	4.68063	5.652	13.8737	1.2	-0.201714	-0.769654	1		206	1	167.093	SNP_1051596	0	3	0.238095	0.242105	0.244444	0.315174	0	-0.0031746	0.000835422	1
1A	207	1	167.198	SNP_1289969	0.15	4	1.84395	1.97181	2.11463	2.17673	0.4	-0.13534	-0.00748531	1		207	1	167.198	SNP_1289969	0.45	4	5.30326	4.68379	5.60091	13.8851	1.1	-0.148827	-0.768293	1		207	1	167.198	SNP_1289969	0	3	0.232558	0.242105	0.25	0.315143	0	-0.00872093	0.000826193	1
1A	208	1	167.384	SNP_3025178	0.48	4	1.69929	2.10589	1.94902	2.15814	1.2	-0.124869	0.28174	1		208	1	167.384	SNP_3025178	1.65	4	5.92262	4.34381	5.7986	13.4697	4.1	0.0620072	-1.5168	1		208	1	167.384	SNP_3025178	0.22	4	0.166667	0.268041	0.255814	0.313463	0.5	-0.0445736	0.0568009	1
1A	209	1	168.384		0.07	4	1.88454	1.97669	2.06534	2.18156	0.2	-0.0904008	0.0017458	0.952		209	1	168.384		0.73	5	5.38714	4.57699	5.78612	13.7722	1.9	-0.19949	-1.00964	0.952		209	1	168.384		0.03	5	0.212626	0.246884	0.260128	0.314884	0.1	-0.0237507	0.0105066	0.952
1A	210	1	168.661	SNP_1069239	0.07	4	1.93682	1.94131	2.09432	2.18128	0.2	-0.0787509	-0.0742562	0.999		210	1	168.661	SNP_1069239	0.54	4	5.18947	4.67989	5.75567	13.8516	1.4	-0.283103	-0.792681	0.999		210	1	168.661	SNP_1069239	0.02	4	0.227267	0.239861	0.26122	0.315039	0	-0.0169767	-0.00438214	0.999
1A	211	1	169.661		0.04	4	1.8971	1.97559	2.04094	2.18282	0.1	-0.071922	0.00656963	0.96		211	1	169.661		0.64	5	5.25376	4.59131	5.74066	13.801	1.7	-0.24345	-0.905897	0.96		211	1	169.661		0	4	0.237723	0.245025	0.239124	0.315168	0	-0.000700698	0.00660195	0.96
1A	212	1	170.2	SNP_2276922	0.05	4	1.8768	1.99611	2.01488	2.18249	0.1	-0.0690377	0.0502676	0.998		212	1	170.2	SNP_2276922	0.64	4	5.26925	4.58547	5.67445	13.8157	1.6	-0.202601	-0.886381	0.998		212	1	170.2	SNP_2276922	0.01	4	0.243827	0.247925	0.22966	0.315118	0	0.00708317	0.0111817	0.998
1A	213	1	171.2		0.06	4	1.86878	1.99427	2.02633	2.18186	0.2	-0.0787789	0.0467143	0.944		213	1	171.2		0.61	6	5.22862	4.58044	5.73856	13.7949	1.8	-0.254971	-0.903149	0.944		213	1	171.2		0.01	4	0.248808	0.246051	0.228471	0.31511	0	0.0101687	0.00741189	0.944
1A	214	1	172.2		0.07	5	1.86115	1.99181	2.03946	2.18112	0.2	-0.0891537	0.0415104	0.904		214	1	172.2		0.56	7	5.17108	4.5961	5.78413	13.7903	1.8	-0.306525	-0.8815	0.904		214	1	172.2		0.01	5	0.254016	0.244024	0.227363	0.315086	0	0.0133262	0.00333449	0.904
1A	215	1	173.2		0.08	5	1.85402	1.989	2.0538	2.18027	0.2	-0.0998916	0.0350947	0.879		215	1	173.2		0.5	8	5.09166	4.63631	5.80551	13.805	1.7	-0.356922	-0.812274	0.879		215	1	173.2		0.02	5	0.259244	0.241956	0.226312	0.315046	0	0.016466	-0.000822885	0.879
1A	216	1	174.2		0.1	6	1.84744	1.98627	2.06853	2.17932	0.3	-0.110546	0.0282884	0.868		216	1	174.2		0.44	8	4.98977	4.70017	5.80112	13.8342	1.5	-0.405676	-0.695273	0.868		216	1	174.2		0.02	5	0.26424	0.239987	0.225265	0.314992	0.1	0.0194875	-0.004766	0.868
1A	217	1	175.2		0.11	6	1.84142	1.98415	2.08244	2.17834	0.3	-0.12051	0.0222171	0.871		217	1	175.2		0.39	7	4.87496	4.77976	5.77395	13.8669	1.3	-0.449495	-0.544697	0.871		217	1	175.2		0.03	5	0.268756	0.238249	0.224165	0.314927	0.1	0.0222956	-0.00821102	0.871
1A	218	1	176.2		0.13	6	1.83599	1.98304	2.09442	2.17743	0.4	-0.129214	0.0178319	0.888		218	1	176.2		0.35	7	4.76629	4.86175	5.73086	13.8931	1.1	-0.482289	-0.386827	0.888		218	1	176.2		0.04	5	0.272606	0.236831	0.222974	0.31486	0.1	0.0248159	-0.0109592	0.888
1A	219	1	177.2		0.15	5	1.83119	1.98311	2.1037	2.17666	0.4	-0.136256	0.0156659	0.919		219	1	177.2		0.33	5	4.67914	4.93544	5.67918	13.9107	0.9	-0.500016	-0.243718	0.919		219	1	177.2		0.05	5	0.275692	0.23576	0.221693	0.314796	0.1	0.0269998	-0.0129324	0.919
1A	220	1	178.2		0.16	4	1.82709	1.98428	2.11006	2.17608	0.4	-0.141487	0.0157074	0.964		220	1	178.2		0.33	5	4.61838	4.99618	5.62502	13.9223	0.9	-0.503318	-0.125524	0.964		220	1	178.2		0.05	4	0.277999	0.235016	0.220357	0.314741	0.1	0.0288213	-0.0141615	0.964
1A	221	1	178.83	SNP_1239222	0.17	4	1.82488	1.98546	2.11263	2.17583	0.4	-0.143874	0.0167063	1		221	1	178.83	SNP_1239222	0.33	4	4.59256	5.02765	5.59146	13.9279	0.8	-0.499453	-0.0643577	1		221	1	178.83	SNP_1239222	0.06	4	0.27907	0.234694	0.219512	0.314712	0.1	0.0297788	-0.0145971	1
1A	222	1	179.83		0.16	5	1.84331	1.97326	2.12496	2.176	0.4	-0.140822	-0.0108785	0.948		222	1	179.83		0.32	4	4.5917	5.03858	5.57332	13.9277	0.8	-0.490813	-0.0439263	0.948		222	1	179.83		0.09	6	0.287933	0.216673	0.248331	0.314314	0.3	0.019801	-0.0514593	0.948
1A	223	1	180.83		0.15	5	1.86832	1.95687	2.13397	2.1764	0.4	-0.132821	-0.0442778	0.934		223	1	180.83		0.3	5	4.60239	5.0515	5.54067	13.9337	0.8	-0.469142	-0.0200273	0.934		223	1	180.83		0.21	7	0.294377	0.194914	0.281555	0.312983	0.7	0.00641073	-0.0930523	0.934
1A	224	1	181.83		0.15	4	1.8948	1.93904	2.13832	2.17665	0.4	-0.12176	-0.0775134	0.957		224	1	181.83		0.27	4	4.62401	5.06492	5.49748	13.9446	0.7	-0.436732	0.0041717	0.957		224	1	181.83		0.36	6	0.295394	0.181825	0.298524	0.311874	1	-0.00156492	-0.115134	0.957
1A	225	1	182.559	SNP_3574422	0.15	4	1.91157	1.92738	2.13817	2.17671	0.4	-0.113299	-0.0974902	0.997		225	1	182.559	SNP_3574422	0.25	4	4.64558	5.07395	5.4624	13.9544	0.6	-0.408412	0.0199619	0.997		225	1	182.559	SNP_3574422	0.45	4	0.293609	0.17763	0.302367	0.311578	1.1	-0.0043788	-0.120357	0.997

## Sheet: C2
48hai	Intervall (0.95)	3													72hai	Intervall (0.95)	2.8													Macro	Intervall (0.95)	2.9
Chromosome	Nr	Group	Position	Locus	LOD	# Iter.	mu_A	mu_H	mu_B	Variance	% Expl.	Additive	Dominance	GIC		Nr	Group	Position	Locus	LOD	# Iter.	mu_A	mu_H	mu_B	Variance	% Expl.	Additive	Dominance	GIC		Nr	Group	Position	Locus	LOD	# Iter.	mu_A	mu_H	mu_B	Variance	% Expl.	Additive	Dominance	GIC
2A	1	2	0	SNP_1665896	0.2	4	1.95628	2.05884	1.79075	2.17391	0.5	0.0827645	0.185328	1		1	2	0	SNP_1665896	0.16	4	4.84682	4.95792	5.48143	13.9862	0.4	-0.317305	-0.206207	1		1	2	0	SNP_1665896	1.34	4	0.363636	0.260417	0.0714286	0.304709	3.3	0.146104	0.0428842	1
2A	2	2	1		0.34	4	1.95139	2.08348	1.73046	2.16592	0.9	0.110467	0.242557	0.978		2	2	1		0.1	4	4.97985	4.9337	5.40935	14.0063	0.3	-0.21475	-0.260895	0.978		2	2	1		1.2	5	0.368184	0.249402	0.0842349	0.305607	3	0.141975	0.0231921	0.978
2A	3	2	1.799	SNP_1687644	0.46	4	1.94778	2.10021	1.68868	2.15932	1.2	0.129547	0.28198	1		3	2	1.799	SNP_1687644	0.07	4	5.07957	4.92323	5.32875	14.0178	0.2	-0.124592	-0.280928	1		3	2	1.799	SNP_1687644	1.09	4	0.369565	0.239583	0.1	0.306632	2.7	0.134783	0.00480072	1
2A	4	2	2.799		0.47	6	1.94493	2.11112	1.6822	2.15658	1.3	0.131362	0.297553	0.925		4	2	2.799		0.06	5	4.93667	4.9889	5.32602	14.0211	0.2	-0.194673	-0.14244	0.925		4	2	2.799		1.3	6	0.38768	0.237289	0.085247	0.304123	3.5	0.151217	0.000825793	0.925
2A	5	2	3.799		0.45	7	1.95341	2.11383	1.68578	2.15637	1.3	0.133814	0.294234	0.892		5	2	3.799		0.09	5	4.80368	5.05801	5.31895	14.0105	0.2	-0.257639	-0.00330901	0.892		5	2	3.799		1.46	7	0.39822	0.235475	0.078218	0.302401	4.1	0.160001	-0.00274442	0.892
2A	6	2	4.799		0.41	6	1.9749	2.10532	1.7007	2.15917	1.2	0.1371	0.267516	0.901		6	2	4.799		0.14	5	4.69677	5.1181	5.31763	13.9899	0.4	-0.310433	0.1109	0.901		6	2	4.799		1.56	7	0.399503	0.235757	0.0772231	0.301778	4.3	0.16114	-0.00260608	0.901
2A	7	2	5.799		0.36	5	2.00147	2.088	1.72577	2.16375	1	0.13785	0.224377	0.952		7	2	5.799		0.21	4	4.62669	5.15822	5.32725	13.9683	0.5	-0.350277	0.181247	0.952		7	2	5.799		1.58	6	0.391903	0.239017	0.0807962	0.302256	4.1	0.155554	0.0026671	0.952
2A	8	2	6.352	SNP_3575335	0.34	4	2.01433	2.07687	1.74251	2.16641	0.9	0.135912	0.198448	0.997		8	2	6.352	SNP_3575335	0.24	4	4.60565	5.16906	5.33727	13.9593	0.6	-0.36581	0.197605	0.997		8	2	6.352	SNP_3575335	1.57	4	0.384611	0.242069	0.0844268	0.302905	3.9	0.150092	0.00755023	0.997
2A	9	2	7.352		0.51	6	1.88465	2.14863	1.71338	2.15166	1.5	0.0856338	0.349611	0.929		9	2	7.352		0.14	4	4.69859	5.10453	5.32239	13.9911	0.4	-0.311904	0.0940397	0.929		9	2	7.352		1.67	5	0.407006	0.234105	0.0835964	0.301745	4.3	0.161705	-0.0111961	0.929
2A	10	2	8.352		0.75	5	1.76816	2.17837	1.72514	2.13874	2.1	0.0215111	0.43172	0.95		10	2	8.352		0.07	4	4.8063	5.07215	5.25545	14.0188	0.2	-0.224572	0.0412727	0.95		10	2	8.352		1.72	5	0.42365	0.228407	0.0882639	0.30143	4.4	0.167693	-0.0275503	0.95
2A	11	2	8.9	SNP_3575189	0.84	4	1.72595	2.17443	1.75195	2.13818	2.2	-0.0130018	0.43548	1		11	2	8.9	SNP_3575189	0.04	4	4.86414	5.06831	5.19814	14.0303	0.1	-0.166999	0.0371663	1		11	2	8.9	SNP_3575189	1.72	4	0.428558	0.226811	0.0930233	0.301781	4.3	0.167767	-0.0339797	1
2A	12	2	9.9		1.09	5	1.70887	2.20669	1.68381	2.1208	3	0.012534	0.510354	0.948		12	2	9.9		0.07	4	4.78403	5.08938	5.24494	14.0175	0.2	-0.230456	0.0748952	0.948		12	2	9.9		1.59	5	0.421982	0.225271	0.0934168	0.302469	4	0.164282	-0.0324284	0.948
2A	13	2	10.9		1.28	4	1.709	2.21867	1.64773	2.11319	3.3	0.0306327	0.540306	0.983		13	2	10.9		0.12	4	4.70089	5.13078	5.25423	14.0012	0.3	-0.276672	0.153216	0.983		13	2	10.9		1.39	4	0.404573	0.224493	0.100444	0.304229	3.5	0.152065	-0.0280152	0.983
2A	14	2	11.098	SNP_1698892	1.3	4	1.71091	2.21876	1.64432	2.11302	3.3	0.0332924	0.541146	1		14	2	11.098	SNP_1698892	0.13	4	4.68578	5.14031	5.25205	13.9977	0.3	-0.283137	0.171392	1		14	2	11.098	SNP_1698892	1.34	4	0.4	0.22449	0.102564	0.304676	3.3	0.148718	-0.0267923	1
2A	15	2	12.098		1.25	5	1.70768	2.21482	1.64244	2.11352	3.3	0.0326182	0.539755	0.969		15	2	12.098		0.09	5	4.74433	5.10899	5.25518	14.0102	0.2	-0.255426	0.109235	0.969		15	2	12.098		1.52	5	0.412725	0.225989	0.088763	0.303089	3.8	0.161981	-0.0247551	0.969
2A	16	2	13.098		1.11	4	1.72568	2.19282	1.65579	2.12343	2.8	0.0349409	0.502087	0.998		16	2	13.098		0.05	4	4.86163	5.057	5.25358	14.0265	0.1	-0.195977	-0.000606994	0.998		16	2	13.098		1.67	4	0.418555	0.22767	0.0791579	0.302161	4.1	0.169698	-0.0211864	0.998
2A	17	2	13.125	SNP_1861779	1.1	4	1.72643	2.192	1.65639	2.12381	2.8	0.0350198	0.500591	1		17	2	13.125	SNP_1861779	0.05	4	4.86488	5.05564	5.25342	14.0269	0.1	-0.194269	-0.00350882	1		17	2	13.125	SNP_1861779	1.67	4	0.418605	0.227723	0.0789474	0.302146	4.1	0.169829	-0.0210532	1
2A	18	2	14.125		1.25	5	1.7031	2.21918	1.66494	2.11458	3.2	0.0190809	0.535164	0.974		18	2	14.125		0.25	5	4.56761	5.12158	5.44886	13.9485	0.7	-0.440621	0.113343	0.974		18	2	14.125		1.53	5	0.412108	0.220901	0.0936337	0.303018	3.9	0.159237	-0.0319703	0.974
2A	19	2	14.558	SNP_3575023	1.28	4	1.70286	2.22334	1.67004	2.11399	3.3	0.0164097	0.536894	1		19	2	14.558	SNP_3575023	0.35	4	4.51464	5.12317	5.52378	13.9187	0.9	-0.50457	0.103964	1		19	2	14.558	SNP_3575023	1.44	4	0.404248	0.218754	0.102561	0.30393	3.6	0.150843	-0.0346504	1
2A	20	2	15.558		1.34	5	1.73128	2.24509	1.61965	2.10385	3.7	0.0558142	0.569627	0.934		20	2	15.558		0.32	7	4.66982	4.95286	5.69083	13.9072	1	-0.510504	-0.227464	0.934		20	2	15.558		1.75	7	0.444924	0.201769	0.105373	0.299552	5	0.169776	-0.0733792	0.934
2A	21	2	16.558		1.41	6	1.77102	2.25872	1.58671	2.09752	4	0.092154	0.579857	0.92		21	2	16.558		0.33	7	4.83019	4.82586	5.73231	13.8908	1.1	-0.45106	-0.45539	0.92		21	2	16.558		1.95	7	0.464529	0.191869	0.11554	0.297536	5.6	0.174494	-0.0981658	0.92
2A	22	2	17.558		1.45	5	1.83053	2.25723	1.57387	2.09911	3.9	0.128329	0.555033	0.958		22	2	17.558		0.29	5	4.96514	4.78983	5.61502	13.9242	0.8	-0.32494	-0.500253	0.958		22	2	17.558		2.04	5	0.465616	0.181623	0.142621	0.298396	5.3	0.161497	-0.122495	0.958
2A	23	2	18.091	SNP_1860169	1.46	4	1.87276	2.24718	1.57667	2.10421	3.7	0.148043	0.522469	1		23	2	18.091	SNP_1860169	0.26	4	5.02212	4.7986	5.51934	13.9527	0.6	-0.248609	-0.472125	1		23	2	18.091	SNP_1860169	2.14	4	0.46669	0.172417	0.159986	0.298535	5.3	0.153352	-0.14092	1
2A	24	2	19.091		0.95	4	1.87272	2.17003	1.59017	2.13086	2.5	0.141277	0.438584	0.986		24	2	19.091		0.31	4	5.02202	4.81428	5.67228	13.9296	0.8	-0.325132	-0.532871	0.986		24	2	19.091		2.27	5	0.466685	0.191535	0.109364	0.297519	5.6	0.178661	-0.0964899	0.986
2A	25	2	19.233	SNP_3574667	0.87	4	1.87273	2.1553	1.60333	2.13695	2.2	0.134701	0.417277	1		25	2	19.233	SNP_3574667	0.3	4	5.022	4.82906	5.66774	13.9372	0.8	-0.322871	-0.515812	1		25	2	19.233	SNP_3574667	2.29	4	0.466667	0.191918	0.105266	0.297431	5.6	0.180701	-0.0940486	1
2A	26	2	20.233		0.91	7	1.7638	2.1892	1.63129	2.12526	2.8	0.0662541	0.491656	0.964		26	2	20.233		0.28	5	5.06608	4.82047	5.63811	13.9424	0.7	-0.286016	-0.531632	0.964		26	2	20.233		2.2	6	0.472881	0.193569	0.0922343	0.295998	6.1	0.190324	-0.0889886	0.964
2A	27	2	21.233		0.77	5	1.75976	2.16671	1.6971	2.13815	2.2	0.0313337	0.438279	0.982		27	2	21.233		0.25	4	5.0901	4.82879	5.59245	13.9549	0.6	-0.251176	-0.512482	0.982		27	2	21.233		1.78	6	0.437352	0.215156	0.0817307	0.300076	4.8	0.177811	-0.0443849	0.982
2A	28	2	21.568	SNP_1862131	0.7	4	1.7686	2.1502	1.73388	2.14625	1.8	0.0173605	0.398955	1		28	2	21.568	SNP_1862131	0.23	4	5.09295	4.83576	5.57303	13.9608	0.6	-0.240035	-0.497229	1		28	2	21.568	SNP_1862131	1.58	4	0.409091	0.229998	0.0789495	0.3028	3.9	0.165071	-0.0140226	1
2A	29	2	22.568		0.3	7	1.79453	2.11099	1.83476	2.16324	1	-0.0201146	0.29634	0.968		29	2	22.568		0.25	5	4.9529	4.85887	5.60347	13.9519	0.7	-0.325283	-0.41932	0.968		29	2	22.568		1.77	5	0.425862	0.225925	0.0843129	0.30118	4.4	0.170775	-0.0291627	0.968
2A	30	2	23.199	SNP_3574100	0.07	4	1.88349	2.02957	1.94286	2.18155	0.2	-0.0296844	0.116397	1		30	2	23.199	SNP_3574100	0.25	4	4.86114	4.89447	5.57886	13.9549	0.6	-0.358864	-0.325532	1		30	2	23.199	SNP_3574100	1.85	4	0.431818	0.223404	0.0909091	0.300771	4.6	0.170455	-0.0379594	1
2A	31	2	24.199		0.06	4	1.86641	2.00935	2.00597	2.18167	0.2	-0.0697817	0.0731621	0.953		31	2	24.199		0.11	5	4.95122	4.92504	5.4089	14.0012	0.3	-0.228842	-0.255022	0.953		31	2	24.199		1.6	6	0.411214	0.238085	0.083515	0.301926	4.2	0.16385	-0.00927953	0.953
2A	32	2	25.199		0.1	4	1.85378	1.98551	2.0665	2.17963	0.3	-0.106361	0.0253678	0.986		32	2	25.199		0.02	4	5.04002	4.98343	5.19594	14.0359	0.1	-0.0779612	-0.134544	0.986		32	2	25.199		1.3	5	0.368445	0.260846	0.0841867	0.304685	3.3	0.142129	0.0345302	0.986
2A	33	2	25.34	SNP_3574642	0.11	4	1.85227	1.98254	2.07358	2.17922	0.3	-0.110655	0.0196166	0.997		33	2	25.34	SNP_3574642	0.01	4	5.05228	4.9917	5.16747	14.0384	0	-0.0575941	-0.118172	0.997		33	2	25.34	SNP_3574642	1.27	5	0.360973	0.26445	0.0851094	0.305109	3.2	0.137932	0.041409	0.997
2A	34	2	26.34		0.03	4	1.89688	2.00453	1.97772	2.18352	0.1	-0.0404169	0.0672303	0.963		34	2	26.34		0.16	5	5.08663	4.85239	5.46438	13.9815	0.4	-0.188875	-0.423115	0.963		34	2	26.34		1.37	5	0.374648	0.2606	0.0737004	0.304186	3.5	0.150474	0.0364259	0.963
2A	35	2	26.806	SNP_1862137	0.03	4	1.92179	2.01242	1.929	2.1835	0.1	-0.00360256	0.0870268	1		35	2	26.806	SNP_1862137	0.27	4	5.09525	4.8127	5.58	13.9474	0.7	-0.242375	-0.524925	1		35	2	26.806	SNP_1862137	1.38	4	0.375	0.26	0.0714286	0.3044	3.4	0.151786	0.0367857	1
2A	36	2	27.806		0.02	4	1.93669	2.00609	1.93493	2.18414	0.1	0.000879636	0.0702832	0.96		36	2	27.806		0.31	5	4.98112	4.81546	5.64502	13.9282	0.8	-0.331951	-0.49761	0.96		36	2	27.806		1.28	5	0.384441	0.252919	0.0810114	0.304343	3.4	0.151715	0.0201931	0.96
2A	37	2	28.806		0.01	4	1.95286	1.99732	1.94283	2.18475	0	0.00501484	0.0494804	0.943		37	2	28.806		0.35	5	4.86173	4.83212	5.68896	13.9093	1	-0.413613	-0.443228	0.943		37	2	28.806		1.16	6	0.388264	0.244985	0.0963109	0.304972	3.2	0.145977	0.00269783	0.943
2A	38	2	29.806		0	4	1.96918	1.98686	1.95164	2.18516	0	0.00877125	0.0264504	0.948		38	2	29.806		0.41	5	4.74577	4.86079	5.71207	13.891	1.1	-0.483155	-0.368126	0.948		38	2	29.806		1.02	6	0.387184	0.234561	0.119814	0.30632	2.8	0.133685	-0.0189374	0.948
2A	39	2	30.806		0	3	1.98434	1.97586	1.96001	2.18529	0	0.0121632	0.00369102	0.975		39	2	30.806		0.47	4	4.64229	4.89668	5.7177	13.8735	1.2	-0.537706	-0.28332	0.975		39	2	30.806		0.89	5	0.382147	0.222115	0.148499	0.307882	2.3	0.116824	-0.0432087	0.975
2A	40	2	31.376	SNP_1261373	0	3	1.99205	1.96982	1.96416	2.18526	0	0.0139452	-0.00827739	1		40	2	31.376	SNP_1261373	0.51	4	4.59155	4.91827	5.7148	13.8643	1.3	-0.561623	-0.234899	1		40	2	31.376	SNP_1261373	0.83	4	0.377777	0.215879	0.163307	0.308624	2.1	0.107235	-0.0546634	1
2A	41	2	32.376		0	4	1.97668	1.97714	1.96491	2.18534	0	0.00588865	0.00634113	0.944		41	2	32.376		0.49	5	4.59124	4.9079	5.73746	13.8558	1.3	-0.573106	-0.256448	0.944		41	2	32.376		0.83	5	0.378587	0.220288	0.155659	0.308391	2.2	0.111464	-0.0468348	0.944
2A	42	2	33.376		0	5	1.95783	1.98622	1.96509	2.18521	0	-0.00362768	0.0247578	0.896		42	2	33.376		0.47	6	4.59569	4.89725	5.75638	13.8493	1.4	-0.580349	-0.278783	0.896		42	2	33.376		0.82	6	0.378064	0.225768	0.146847	0.308154	2.2	0.115609	-0.0366878	0.896
2A	43	2	34.376		0.01	7	1.93529	1.99718	1.96452	2.18472	0	-0.0146168	0.0472745	0.857		43	2	34.376		0.45	7	4.60521	4.88717	5.76963	13.8458	1.4	-0.582206	-0.30025	0.857		43	2	34.376		0.82	6	0.376015	0.232269	0.137092	0.307901	2.3	0.119461	-0.0242848	0.857
2A	44	2	35.376		0.02	8	1.90955	2.00969	1.9633	2.18371	0.1	-0.0268733	0.073267	0.826		44	2	35.376		0.42	8	4.61984	4.87882	5.77488	13.8463	1.4	-0.577519	-0.318548	0.826		44	2	35.376		0.82	7	0.372293	0.2396	0.12688	0.307632	2.4	0.122706	-0.00998624	0.826
2A	45	2	36.376		0.03	9	1.88211	2.02279	1.96186	2.18213	0.1	-0.0398758	0.1008	0.804		45	2	36.376		0.39	8	4.6392	4.87364	5.76959	13.8521	1.4	-0.565193	-0.330751	0.804		45	2	36.376		0.83	7	0.366848	0.247439	0.11692	0.307361	2.5	0.124964	0.00555465	0.804
2A	46	2	37.376		0.05	10	1.85546	2.03486	1.96119	2.18014	0.2	-0.0528634	0.126538	0.791		46	2	37.376		0.35	9	4.66283	4.87268	5.75201	13.8635	1.3	-0.544592	-0.334737	0.791		46	2	37.376		0.84	8	0.359736	0.255465	0.107862	0.30711	2.6	0.125937	0.021666	0.791
2A	47	2	38.376		0.07	10	1.83219	2.04423	1.96251	2.17811	0.3	-0.0651589	0.146878	0.785		47	2	38.376		0.31	9	4.68987	4.87706	5.72066	13.8807	1.2	-0.515397	-0.328213	0.785		47	2	38.376		0.85	8	0.351152	0.263401	0.10016	0.306901	2.6	0.125496	0.0377455	0.785
2A	48	2	39.376		0.09	10	1.81376	2.04998	1.96656	2.17641	0.4	-0.0764007	0.159823	0.788		48	2	39.376		0.27	9	4.71969	4.88672	5.67612	13.9026	1	-0.478213	-0.311187	0.788		48	2	39.376		0.87	8	0.341404	0.271063	0.0939732	0.306736	2.7	0.123715	0.0533743	0.788
2A	49	2	40.376		0.11	9	1.80054	2.05203	1.97345	2.17526	0.5	-0.0864537	0.16504	0.799		49	2	40.376		0.23	9	4.7517	4.90081	5.62054	13.927	0.8	-0.434418	-0.285313	0.799		49	2	40.376		0.9	7	0.330916	0.278286	0.08929	0.306609	2.7	0.120813	0.0681824	0.799
2A	50	2	41.376		0.13	8	1.79206	2.05101	1.98245	2.17464	0.5	-0.0951938	0.163753	0.819		50	2	41.376		0.19	8	4.78541	4.91772	5.5575	13.9516	0.7	-0.386047	-0.253732	0.819		50	2	41.376		0.93	7	0.32015	0.284925	0.0860027	0.30651	2.8	0.117074	0.0818489	0.819
2A	51	2	42.376		0.14	8	1.78762	2.04779	1.99252	2.17446	0.5	-0.102454	0.157719	0.847		51	2	42.376		0.15	7	4.82045	4.93532	5.49158	13.9741	0.5	-0.335568	-0.220699	0.847		51	2	42.376		0.96	7	0.30955	0.290839	0.0839959	0.306441	2.8	0.112777	0.0940666	0.847
2A	52	2	43.376		0.16	6	1.78654	2.04311	2.00275	2.1746	0.5	-0.108107	0.148461	0.884		52	2	43.376		0.12	6	4.8563	4.95179	5.42682	13.9932	0.4	-0.285256	-0.189774	0.884		52	2	43.376		1	6	0.299452	0.295931	0.0831544	0.306408	2.8	0.108149	0.104627	0.884
2A	53	2	44.376		0.16	5	1.78809	2.03773	2.01224	2.17494	0.5	-0.112077	0.137567	0.929		53	2	44.376		0.09	5	4.89232	4.96598	5.36612	14.0084	0.3	-0.236902	-0.16324	0.929		53	2	44.376		1.04	5	0.290061	0.300154	0.0833778	0.306423	2.8	0.103342	0.113435	0.929
2A	54	2	45.376		0.17	4	1.79167	2.03211	2.02052	2.17542	0.5	-0.114425	0.126009	0.983		54	2	45.376		0.07	4	4.92775	4.97745	5.31115	14.0198	0.2	-0.191699	-0.142003	0.983		54	2	45.376		1.09	4	0.281464	0.303508	0.0845834	0.306499	2.8	0.0984404	0.120484	0.983
2A	55	2	45.666	SNP_3574815	0.17	4	1.79302	2.03048	2.02267	2.17558	0.4	-0.114823	0.122639	1		55	2	45.666	SNP_3574815	0.06	4	4.93781	4.98026	5.29638	14.0225	0.2	-0.179286	-0.136837	1		55	2	45.666	SNP_3574815	1.1	4	0.279122	0.304321	0.0851063	0.306534	2.7	0.0970079	0.122207	1
2A	56	2	46.666		0.26	6	1.75933	2.08192	1.94394	2.16834	0.8	-0.0923026	0.23028	0.937		56	2	46.666		0.11	5	4.93914	4.92641	5.4211	13.9987	0.3	-0.240981	-0.253709	0.937		56	2	46.666		0.85	5	0.280344	0.294835	0.094706	0.308007	2.3	0.0928189	0.10731	0.937
2A	57	2	47.666		0.41	6	1.74488	2.12345	1.8602	2.15815	1.2	-0.0576619	0.320904	0.939		57	2	47.666		0.15	5	4.92161	4.90766	5.49872	13.9811	0.4	-0.288555	-0.302504	0.939		57	2	47.666		0.6	6	0.280503	0.282859	0.112728	0.309969	1.7	0.0838876	0.0862439	0.939
2A	58	2	48.598	SNP_3574689	0.57	4	1.75333	2.13792	1.8115	2.15346	1.5	-0.0290833	0.3555	1		58	2	48.598	SNP_3574689	0.16	4	4.88837	4.93485	5.48952	13.9858	0.4	-0.300576	-0.254103	1		58	2	48.598	SNP_3574689	0.37	4	0.27907	0.268041	0.142857	0.312225	0.9	0.0681063	0.0570778	1
2A	59	2	49.493	SNP_1118812	0.18	4	1.80809	2.01298	2.06957	2.17497	0.5	-0.130745	0.0741464	1		59	2	49.493	SNP_1118812	0.28	4	5.08367	4.75964	5.52102	13.9447	0.7	-0.218673	-0.542704	1		59	2	49.493	SNP_1118812	0.51	4	0.244898	0.297619	0.142857	0.311103	1.3	0.0510204	0.103741	1
2A	60	2	50.493		0.31	4	1.76101	2.02423	2.10132	2.16815	0.8	-0.170155	0.0930603	0.998		60	2	50.493		0.35	4	4.98439	4.7798	5.64112	13.9187	0.9	-0.328366	-0.532952	0.998		60	2	50.493		0.57	4	0.24983	0.295628	0.130616	0.310633	1.4	0.0596072	0.105405	0.998
2A	61	2	50.523	SNP_3575296	0.31	4	1.75979	2.02448	2.10227	2.16794	0.8	-0.171243	0.0934528	1		61	2	50.523	SNP_3575296	0.35	4	4.98125	4.7808	5.64413	13.9181	0.9	-0.33144	-0.531895	1		61	2	50.523	SNP_3575296	0.57	4	0.25	0.295455	0.130435	0.310635	1.4	0.0597826	0.105237	1
2A	62	2	51.523		0.31	4	1.76102	2.03232	2.09676	2.1678	0.8	-0.16787	0.103435	0.967		62	2	51.523		0.4	5	4.88184	4.80449	5.73621	13.8922	1.1	-0.427185	-0.504534	0.967		62	2	51.523		0.45	6	0.243053	0.293374	0.136333	0.311195	1.3	0.05336	0.103681	0.967
2A	63	2	52.429	SNP_3574569	0.3	4	1.767	2.04023	2.08512	2.16835	0.8	-0.159061	0.114169	1		63	2	52.429	SNP_3574569	0.36	4	4.76863	4.9058	5.68674	13.9156	0.9	-0.459058	-0.32189	1		63	2	52.429	SNP_3574569	0.3	4	0.235294	0.284091	0.162791	0.312828	0.7	0.0362517	0.0850485	1
2A	64	2	52.853	SNP_983272	0.29	4	1.78438	1.99726	2.1287	2.16924	0.7	-0.17216	0.0407266	1		64	2	52.853	SNP_983272	0.57	4	4.87551	4.73424	5.79437	13.8427	1.4	-0.459432	-0.600707	1		64	2	52.853	SNP_983272	0.31	4	0.204082	0.294118	0.1875	0.31274	0.8	0.00829082	0.0983268	1
2A	65	2	53.151	SNP_2248034	0.59	4	1.68021	2.05233	2.14068	2.15226	1.5	-0.230237	0.141881	1		65	2	53.151	SNP_2248034	0.45	4	4.89184	4.78172	5.73326	13.8845	1.1	-0.420712	-0.530825	1		65	2	53.151	SNP_2248034	0.22	4	0.244898	0.275862	0.173913	0.313457	0.5	0.0354925	0.0664566	1
2A	66	2	54.151		0.43	5	1.71811	2.04654	2.11241	2.1601	1.2	-0.197151	0.13128	0.961		66	2	54.151		0.34	4	4.78194	4.88305	5.63396	13.9218	0.9	-0.426011	-0.324896	0.961		66	2	54.151		0.2	5	0.240519	0.278773	0.177458	0.313458	0.5	0.0315303	0.069784	0.961
2A	67	2	55.151		0.28	5	1.76915	2.03288	2.08533	2.16886	0.8	-0.158089	0.105638	0.965		67	2	55.151		0.28	4	4.67239	5.00067	5.52418	13.942	0.7	-0.425892	-0.0976179	0.965		67	2	55.151		0.17	5	0.237179	0.278581	0.185284	0.313695	0.5	0.0259472	0.067349	0.965
2A	68	2	56.003	SNP_3575255	0.17	4	1.8204	2.01532	2.06347	2.17578	0.4	-0.121535	0.0733818	1		68	2	56.003	SNP_3575255	0.28	4	4.59412	5.10138	5.43196	13.9433	0.7	-0.418922	0.0883358	1		68	2	56.003	SNP_3575255	0.14	4	0.235294	0.275	0.196078	0.314097	0.3	0.0196078	0.0593137	1
2A	69	2	57.003		0.19	4	1.82352	1.99624	2.09779	2.1747	0.5	-0.137133	0.0355825	0.97		69	2	57.003		0.3	4	4.57079	5.12598	5.4371	13.9359	0.8	-0.433157	0.122037	0.97		69	2	57.003		0.01	5	0.243383	0.249357	0.227299	0.315097	0	0.00804197	0.0140161	0.97
2A	70	2	57.763	SNP_1056226	0.21	4	1.82647	1.98354	2.12311	2.17347	0.5	-0.14832	0.00874574	1		70	2	57.763	SNP_1056226	0.31	4	4.55519	5.15349	5.42191	13.9331	0.8	-0.433361	0.16494	1		70	2	57.763	SNP_1056226	0.02	4	0.25	0.228916	0.255319	0.315037	0	-0.00265957	-0.0237439	1
2A	71	2	58.763		0.19	4	1.82596	1.99558	2.10298	2.1745	0.5	-0.138509	0.0311161	0.99		71	2	58.763		0.52	4	4.55864	4.98401	5.71144	13.8565	1.3	-0.576401	-0.151027	0.99		71	2	58.763		0.01	4	0.246201	0.233422	0.251045	0.31512	0	-0.00242197	-0.0152008	0.99
2A	72	2	59.002	SNP_3574847	0.19	4	1.82635	1.99826	2.09802	2.17476	0.5	-0.135839	0.036077	1		72	2	59.002	SNP_3574847	0.59	4	4.5617	4.95235	5.76104	13.8366	1.5	-0.599673	-0.209023	1		72	2	59.002	SNP_3574847	0.01	3	0.245283	0.234567	0.250002	0.315135	0	-0.00235964	-0.013076	1
2A	73	2	60.002		0.16	4	1.86828	1.95682	2.12648	2.17606	0.4	-0.129099	-0.0405628	0.978		73	2	60.002		0.35	4	4.57941	5.084	5.52933	13.9187	0.9	-0.474958	0.0296335	0.978		73	2	60.002		0.06	5	0.267355	0.217625	0.254472	0.314685	0.2	0.00644145	-0.0432889	0.978
2A	74	2	60.762	SNP_1225740	0.16	4	1.89736	1.9335	2.13556	2.17629	0.4	-0.119099	-0.082957	1		74	2	60.762	SNP_1225740	0.22	4	4.64944	5.1358	5.36957	13.9664	0.6	-0.360065	0.126293	1		74	2	60.762	SNP_1225740	0.11	4	0.277778	0.209877	0.255319	0.314295	0.3	0.0112293	-0.0566719	1
2A	75	2	61.762		0.24	4	1.84203	1.95741	2.15902	2.17181	0.6	-0.158496	-0.0431162	0.981		75	2	61.762		0.22	4	4.64986	5.10932	5.40555	13.9642	0.6	-0.377845	0.0816205	0.981		75	2	61.762		0.07	5	0.267305	0.214814	0.261951	0.314555	0.2	0.00267727	-0.0498139	0.981
2A	76	2	62.469	SNP_3574708	0.31	4	1.8066	1.97035	2.17512	2.16772	0.8	-0.184258	-0.0205052	1		76	2	62.469	SNP_3574708	0.22	4	4.65824	5.08721	5.43044	13.9642	0.6	-0.386105	0.0428694	1		76	2	62.469	SNP_3574708	0.05	4	0.254902	0.22093	0.266667	0.314773	0.1	-0.00588235	-0.0398541	1
2A	77	2	62.469	SNP_1064939	0.31	4	1.8066	1.97035	2.17512	2.16772	0.8	-0.184258	-0.0205052	1		77	2	62.469	SNP_1064939	0.22	4	4.65824	5.08721	5.43044	13.9642	0.6	-0.386105	0.0428694	1		77	2	62.469	SNP_1064939	0.05	4	0.254902	0.22093	0.266667	0.314773	0.1	-0.00588235	-0.0398541	1
2A	78	2	63.469		0.28	4	1.84131	1.94769	2.17428	2.16948	0.7	-0.166486	-0.0601048	0.988		78	2	63.469		0.14	4	4.75141	5.07529	5.34551	13.9938	0.4	-0.297046	0.0268286	0.988		78	2	63.469		0.07	4	0.259497	0.215044	0.266232	0.314614	0.2	-0.00336738	-0.0478201	0.988
2A	79	2	63.592	SNP_1073174	0.28	4	1.84556	1.94474	2.17371	2.16968	0.7	-0.164078	-0.0648982	1		79	2	63.592	SNP_1073174	0.13	4	4.75907	5.08201	5.32594	13.9976	0.3	-0.283434	0.0395044	1		79	2	63.592	SNP_1073174	0.07	4	0.259259	0.215189	0.265308	0.314633	0.2	-0.00302451	-0.047095	1
2A	80	2	64.592		0.55	5	1.74842	1.97028	2.24186	2.15384	1.4	-0.246717	-0.0248575	0.965		80	2	64.592		0.05	4	4.83851	5.0965	5.20113	14.0246	0.1	-0.181312	0.0766837	0.965		80	2	64.592		0.01	4	0.233389	0.236675	0.260611	0.315059	0	-0.0136109	-0.0103259	0.965
2A	81	2	65.3	SNP_3574956	0.8	4	1.68766	1.97956	2.28927	2.14081	2	-0.300804	-0.00890838	1		81	2	65.3	SNP_3574956	0.02	4	4.91043	5.10848	5.08535	14.0366	0.1	-0.0874617	0.110591	1		81	2	65.3	SNP_3574956	0.04	4	0.212766	0.25	0.255814	0.314881	0.1	-0.021524	0.01571	1
2A	82	2	65.527	SNP_1341019	0.6	4	1.77592	1.93523	2.27651	2.15174	1.5	-0.250297	-0.0909824	1		82	2	65.527	SNP_1341019	0.08	4	4.78143	5.12364	5.206	14.0156	0.2	-0.212285	0.129921	1		82	2	65.527	SNP_1341019	0.07	4	0.204082	0.261364	0.244444	0.31461	0.2	-0.0201814	0.0371005	1
2A	83	2	65.891	SNP_1228209	0.54	4	1.78489	1.93584	2.26571	2.15512	1.4	-0.24041	-0.0894613	1		83	2	65.891	SNP_1228209	0.07	4	4.77638	5.15582	5.13114	14.0171	0.2	-0.177377	0.202065	1		83	2	65.891	SNP_1228209	0.04	4	0.212766	0.252747	0.25	0.314885	0.1	-0.018617	0.0213643	1
2A	84	2	66.407	SNP_1220267	0.63	4	1.81608	1.89829	2.29022	2.15031	1.6	-0.237072	-0.154858	1		84	2	66.407	SNP_1220267	0.07	4	4.85863	5.21422	4.97646	14.0196	0.2	-0.0589154	0.296674	1		84	2	66.407	SNP_1220267	0.03	4	0.215686	0.253012	0.25	0.314913	0.1	-0.0171569	0.0201689	1
2A	85	2	67.407		0.53	4	1.80514	1.93228	2.27148	2.15571	1.4	-0.233168	-0.106032	0.992		85	2	67.407		0.19	4	4.68489	5.30024	4.99464	13.975	0.5	-0.154877	0.460474	0.992		85	2	67.407		0.01	4	0.229677	0.242146	0.255469	0.315093	0	-0.0128961	-0.000426657	0.992
2A	86	2	67.473	SNP_1075419	0.52	4	1.805	1.93506	2.26829	2.15636	1.3	-0.231646	-0.101588	1		86	2	67.473	SNP_1075419	0.2	4	4.67481	5.30333	4.99907	13.9721	0.5	-0.162131	0.466395	1		86	2	67.473	SNP_1075419	0.01	4	0.230769	0.241379	0.255814	0.315098	0	-0.0125224	-0.00191228	1
2A	87	2	67.804	SNP_3574947	0.26	4	1.79354	2.00163	2.13421	2.17072	0.7	-0.170334	0.0377543	1		87	2	67.804	SNP_3574947	0.05	4	4.83521	5.10096	5.1965	14.0254	0.1	-0.180646	0.0851033	1		87	2	67.804	SNP_3574947	0.27	4	0.166667	0.276596	0.25	0.31305	0.7	-0.0416667	0.0682624	1
2A	88	2	68.804		0.19	7	1.8389	1.96962	2.14776	2.1732	0.6	-0.15443	-0.0237045	0.947		88	2	68.804		0.09	5	4.7602	5.20469	5.07902	14.0085	0.3	-0.15941	0.285083	0.947		88	2	68.804		0.03	7	0.217129	0.260054	0.232719	0.314829	0.1	-0.00779519	0.03513	0.947
2A	89	2	69.804		0.1	4	1.89375	1.95959	2.09671	2.17965	0.3	-0.101483	-0.0356448	0.994		89	2	69.804		0.16	4	4.72924	5.29293	4.98584	13.9857	0.4	-0.1283	0.43539	0.994		89	2	69.804		0.08	4	0.281009	0.229804	0.218189	0.314526	0.2	0.0314096	-0.0197953	0.994
2A	90	2	69.862	SNP_1284888	0.1	4	1.89679	1.95951	2.09295	2.18	0.2	-0.0980799	-0.035361	1		90	2	69.862	SNP_1284888	0.17	4	4.72926	5.29661	4.98197	13.9847	0.4	-0.126356	0.440995	1		90	2	69.862	SNP_1284888	0.09	4	0.283026	0.228907	0.217399	0.314458	0.2	0.0328135	-0.0213054	1
2A	91	2	70.862		0.33	4	1.80015	1.97395	2.20416	2.16667	0.9	-0.202005	-0.0281977	0.987		91	2	70.862		0.53	4	4.31839	5.28883	5.36576	13.8531	1.4	-0.523686	0.446751	0.987		91	2	70.862		0.1	4	0.278534	0.214671	0.264824	0.314326	0.3	0.00685497	-0.0570082	0.987
2A	92	2	70.958	SNP_3574449	0.36	4	1.79128	1.97542	2.21457	2.16518	0.9	-0.211647	-0.0275073	1		92	2	70.958	SNP_3574449	0.58	4	4.29128	5.28153	5.40973	13.8398	1.5	-0.559227	0.431027	1		92	2	70.958	SNP_3574449	0.11	4	0.276596	0.214286	0.27027	0.314294	0.3	0.00316274	-0.0591473	1
2A	93	2	71.958		0.23	4	1.85112	1.95485	2.17767	2.1723	0.6	-0.163272	-0.0595455	0.963		93	2	71.958		0.51	5	4.47286	5.06114	5.73165	13.8534	1.4	-0.629399	-0.0411172	0.963		93	2	71.958		0.05	5	0.255867	0.222647	0.269622	0.314768	0.1	-0.00687789	-0.0400972	0.963
2A	94	2	72.378	SNP_3574831	0.18	4	1.87755	1.94844	2.15333	2.17543	0.5	-0.137891	-0.0669977	1		94	2	72.378	SNP_3574831	0.54	4	4.58612	4.96424	5.80512	13.8535	1.4	-0.6095	-0.231383	1		94	2	72.378	SNP_3574831	0.03	4	0.244898	0.228261	0.268293	0.314926	0.1	-0.0116974	-0.0283345	1
2A	95	2	73.378		0.18	4	1.94354	1.90106	2.14528	2.1754	0.5	-0.100871	-0.143351	1		95	2	73.378		0.43	4	4.63866	4.96204	5.68313	13.8904	1.1	-0.522233	-0.198855	1		95	2	73.378		0.01	4	0.230792	0.249955	0.239182	0.315112	0	-0.00419473	0.0149677	1
2A	96	2	73.38	SNP_3574903	0.18	4	1.94365	1.90098	2.14523	2.1754	0.5	-0.100787	-0.143465	1		96	2	73.38	SNP_3574903	0.43	4	4.63885	4.96202	5.68283	13.8905	1.1	-0.52199	-0.198812	1		96	2	73.38	SNP_3574903	0.01	4	0.230769	0.25	0.23913	0.315112	0	-0.0041806	0.0150502	1
2A	97	2	74.38		0.3	5	2.01021	1.85124	2.18677	2.16688	0.8	-0.0882802	-0.247249	0.931		97	2	74.38		0.44	6	4.62036	4.93283	5.75967	13.8648	1.3	-0.569653	-0.257189	0.931		97	2	74.38		0.04	6	0.210079	0.248974	0.26174	0.31479	0.1	-0.0258304	0.0130647	0.931
2A	98	2	75.38		0.44	6	2.07987	1.8173	2.21323	2.15673	1.3	-0.0666797	-0.329247	0.914		98	2	75.38		0.41	7	4.62129	4.92953	5.76773	13.8687	1.2	-0.573224	-0.264986	0.914		98	2	75.38		0.14	6	0.184994	0.248936	0.285469	0.31391	0.4	-0.0502371	0.0137044	0.914
2A	99	2	76.38		0.56	5	2.13797	1.80587	2.21138	2.1512	1.6	-0.0367054	-0.368805	0.949		99	2	76.38		0.33	6	4.64306	4.96088	5.67552	13.9113	0.9	-0.516231	-0.198412	0.949		99	2	76.38		0.29	5	0.162129	0.248264	0.306404	0.312746	0.8	-0.0721378	0.013997	0.949
2A	100	2	77.04	SNP_3026658	0.6	4	2.16525	1.81061	2.19179	2.15191	1.5	-0.0132724	-0.367916	1		100	2	77.04	SNP_3026658	0.27	4	4.66975	4.9905	5.57585	13.9476	0.7	-0.453052	-0.132307	1		100	2	77.04	SNP_3026658	0.4	4	0.15	0.247525	0.317073	0.312033	1	-0.0835366	0.0139882	1
2A	101	2	77.658	SNP_1024358	0.3	4	2.01592	1.85787	2.18025	2.16859	0.8	-0.0821658	-0.240219	1		101	2	77.658	SNP_1024358	0.81	4	4.2549	5.16857	5.72881	13.76	2	-0.736956	0.176718	1		101	2	77.658	SNP_1024358	0.25	4	0.183673	0.241758	0.309524	0.313211	0.6	-0.0629252	-0.0048404	1
2A	102	2	78.218	SNP_3574585	0.3	4	2.01333	1.85933	2.184	2.1684	0.8	-0.0853333	-0.239333	1		102	2	78.218	SNP_3574585	0.63	4	4.43312	5.04609	5.77167	13.8231	1.6	-0.669271	-0.0563089	1		102	2	78.218	SNP_3574585	0.16	4	0.1875	0.25	0.285714	0.313923	0.4	-0.0491071	0.0133929	1
2A	103	2	79.218		0.24	4	1.97919	1.87031	2.16317	2.17163	0.6	-0.0919871	-0.20087	0.972		103	2	79.218		0.54	4	4.36894	5.25032	5.46711	13.8485	1.4	-0.549086	0.332289	0.972		103	2	79.218		0.17	4	0.184987	0.256954	0.278572	0.31381	0.4	-0.0467925	0.0251745	0.972
2A	104	2	79.68	SNP_3574098	0.2	4	1.96391	1.88196	2.14563	2.17411	0.5	-0.0908595	-0.172817	0.998		104	2	79.68	SNP_3574098	0.56	4	4.36849	5.34361	5.33426	13.8466	1.4	-0.482884	0.492233	0.998		104	2	79.68	SNP_3574098	0.17	4	0.185111	0.260046	0.275248	0.313788	0.4	-0.0450685	0.0298668	0.998
2A	105	2	80.68		0.2	5	1.96419	1.88074	2.15526	2.17326	0.6	-0.0955342	-0.178986	0.943		105	2	80.68		0.55	4	4.36051	5.29954	5.40833	13.8435	1.4	-0.523909	0.415123	0.943		105	2	80.68		0.17	5	0.18775	0.25035	0.288765	0.313733	0.5	-0.0505077	0.0120925	0.943
2A	106	2	81.68		0.19	5	1.96462	1.88181	2.15905	2.17309	0.6	-0.0972163	-0.180024	0.917		106	2	81.68		0.56	5	4.35983	5.25308	5.4882	13.8388	1.5	-0.564188	0.32906	0.917		106	2	81.68		0.19	6	0.193437	0.237042	0.307023	0.313438	0.6	-0.0567929	-0.0131884	0.917
2A	107	2	82.68		0.18	5	1.96554	1.8856	2.15532	2.17382	0.5	-0.0948907	-0.17483	0.92		107	2	82.68		0.57	5	4.36545	5.21326	5.55565	13.8341	1.5	-0.595101	0.252706	0.92		107	2	82.68		0.24	6	0.203437	0.222535	0.324368	0.312928	0.7	-0.0604657	-0.0413673	0.92
2A	108	2	83.68		0.16	5	1.96705	1.89227	2.14356	2.17539	0.5	-0.0882539	-0.163041	0.952		108	2	83.68		0.58	5	4.37675	5.18611	5.59588	13.8338	1.5	-0.609564	0.199799	0.952		108	2	83.68		0.34	5	0.218396	0.207406	0.338316	0.312239	0.9	-0.0599602	-0.0709502	0.952
2A	109	2	84.506	SNP_3574181	0.15	4	1.96865	1.89952	2.12881	2.17709	0.4	-0.0800778	-0.149208	1		109	2	84.506	SNP_3574181	0.58	4	4.39019	5.17402	5.60488	13.8391	1.5	-0.607346	0.176485	1		109	2	84.506	SNP_3574181	0.48	4	0.230769	0.195402	0.348837	0.311409	1.2	-0.059034	-0.0944009	1
2A	110	2	85.506		0.17	6	1.96076	1.88126	2.15848	2.17291	0.6	-0.0988582	-0.178359	0.95		110	2	85.506		0.57	4	4.3644	5.2307	5.51669	13.8387	1.5	-0.576146	0.290157	0.95		110	2	85.506		0.74	6	0.229027	0.175445	0.378549	0.308415	2.1	-0.074761	-0.128343	0.95
2A	111	2	86.506		0.13	4	1.94775	1.90428	2.12059	2.1774	0.4	-0.086423	-0.129892	0.984		111	2	86.506		0.57	4	4.35712	5.28904	5.41857	13.8429	1.4	-0.530728	0.4012	0.984		111	2	86.506		0.86	5	0.22686	0.172262	0.377137	0.308156	2.2	-0.0751384	-0.129736	0.984
2A	112	2	86.691	SNP_1221170	0.13	4	1.94532	1.90994	2.11197	2.1783	0.3	-0.0833243	-0.118706	1		112	2	86.691	SNP_1221170	0.57	4	4.35827	5.29844	5.40163	13.8442	1.4	-0.521679	0.418493	1		112	2	86.691	SNP_1221170	0.87	4	0.226413	0.172841	0.374997	0.308315	2.2	-0.0742919	-0.127864	1
2A	113	2	87.691		0.02	5	1.95302	2.01027	1.93214	2.1842	0.1	0.0104407	0.0676898	0.976		113	2	87.691		0.68	5	4.44422	5.01565	5.79688	13.7973	1.8	-0.676328	-0.104897	0.976		113	2	87.691		0.17	5	0.249845	0.204906	0.299549	0.313683	0.5	-0.0248521	-0.0697909	0.976
2A	114	2	87.817	SNP_989833	0.03	4	1.95452	2.01878	1.91444	2.18345	0.1	0.0200369	0.0842988	0.997		114	2	87.817	SNP_989833	0.71	4	4.45922	4.99504	5.81892	13.7942	1.8	-0.679848	-0.144028	0.997		114	2	87.817	SNP_989833	0.11	4	0.252633	0.212913	0.282608	0.314338	0.3	-0.0149875	-0.0547081	0.997
2A	115	2	88.794	SNP_1279498	0.04	4	1.93216	1.96261	2.064	2.18321	0.1	-0.0659216	-0.0354697	1		115	2	88.794	SNP_1279498	0.65	4	4.30569	5.26674	5.54194	13.816	1.6	-0.618129	0.342921	1		115	2	88.794	SNP_1279498	0.27	4	0.235294	0.210526	0.333333	0.313	0.7	-0.0490196	-0.0737874	1
2A	116	2	89.794		0.2	5	2.01822	1.86782	2.1531	2.17268	0.6	-0.0674385	-0.217842	0.96		116	2	89.794		0.79	5	4.28458	5.2511	5.69917	13.7565	2	-0.707296	0.259222	0.96		116	2	89.794		0.1	4	0.228719	0.226321	0.295806	0.314394	0.2	-0.0335431	-0.0359415	0.96
2A	117	2	90.347	SNP_1201715	0.37	4	2.05251	1.82632	2.17401	2.16475	0.9	-0.0607506	-0.286936	0.997		117	2	90.347	SNP_1201715	0.83	4	4.30175	5.25416	5.70767	13.7517	2.1	-0.70296	0.249455	0.997		117	2	90.347	SNP_1201715	0.04	4	0.225451	0.237142	0.274999	0.314842	0.1	-0.0247744	-0.0130828	0.997
2A	118	2	91.347		0.26	5	2.03625	1.85215	2.17234	2.16886	0.8	-0.0680468	-0.252146	0.935		118	2	91.347		0.79	5	4.27618	5.22857	5.74637	13.7487	2.1	-0.735096	0.217288	0.935		118	2	91.347		0.12	4	0.220857	0.229217	0.301788	0.314225	0.3	-0.0404657	-0.0321055	0.935
2A	119	2	92.347		0.15	5	2.00187	1.89226	2.14623	2.17585	0.4	-0.0721817	-0.181785	0.936		119	2	92.347		0.71	6	4.27754	5.22381	5.69988	13.7775	1.9	-0.711172	0.235104	0.936		119	2	92.347		0.23	5	0.215242	0.223334	0.329016	0.313313	0.6	-0.0568872	-0.0487947	0.936
2A	120	2	93.347		0.07	4	1.95944	1.93608	2.10058	2.18148	0.2	-0.0705695	-0.0939292	0.999		120	2	93.347		0.61	4	4.29963	5.24503	5.54654	13.828	1.5	-0.623454	0.321943	0.999		120	2	93.347		0.36	4	0.20842	0.220025	0.352697	0.312326	0.9	-0.0721387	-0.0605336	0.999
2A	121	2	93.359	SNP_988300	0.07	4	1.95896	1.93656	2.1	2.18152	0.2	-0.0705208	-0.0929167	1		121	2	93.359	SNP_988300	0.61	4	4.3	5.2453	5.54441	13.8286	1.5	-0.622206	0.323094	1		121	2	93.359	SNP_988300	0.36	4	0.208333	0.22	0.352941	0.312315	0.9	-0.0723039	-0.0606373	1
2A	122	2	94.359		0.07	4	1.97262	1.92803	2.09276	2.18145	0.2	-0.0600725	-0.104661	0.939		122	2	94.359		0.74	6	4.32921	5.12481	5.87385	13.7597	2	-0.772319	0.0232817	0.939		122	2	94.359		0.37	5	0.187493	0.230685	0.347254	0.312086	1	-0.0798808	-0.0366879	0.939
2A	123	2	95.359		0.06	4	1.9833	1.92175	2.08128	2.18159	0.2	-0.0489911	-0.110545	0.942		123	2	95.359		0.92	6	4.39926	4.99993	6.08347	13.692	2.5	-0.842103	-0.241441	0.942		123	2	95.359		0.41	5	0.170096	0.244304	0.336263	0.311794	1.1	-0.0830834	-0.00887558	0.942
2A	124	2	96.264	SNP_3574600	0.06	4	1.98875	1.91928	2.06846	2.18195	0.2	-0.0398558	-0.109329	1		124	2	96.264	SNP_3574600	1.05	4	4.475	4.92244	6.13775	13.6741	2.6	-0.831375	-0.383933	1		124	2	96.264	SNP_3574600	0.46	4	0.160714	0.255814	0.325	0.311542	1.2	-0.0821429	0.0129568	1
2A	125	2	97.264		0.08	4	1.99022	1.91018	2.08359	2.18074	0.2	-0.046685	-0.126726	0.956		125	2	97.264		1.06	5	4.44368	4.94118	6.14262	13.6622	2.7	-0.849466	-0.351966	0.956		125	2	97.264		0.6	6	0.153145	0.246241	0.354847	0.309921	1.7	-0.100851	-0.00775523	0.956
2A	126	2	98.264		0.1	5	1.99113	1.90229	2.09657	2.17954	0.3	-0.0527204	-0.141562	0.935		126	2	98.264		1.05	5	4.41803	4.96358	6.12755	13.6606	2.7	-0.854755	-0.309207	0.935		126	2	98.264		0.77	6	0.150836	0.234628	0.381525	0.308252	2.2	-0.115344	-0.0315529	0.935
2A	127	2	99.264		0.11	5	1.99115	1.89627	2.1067	2.17851	0.3	-0.0577764	-0.152656	0.939		127	2	99.264		1.03	5	4.40032	4.98732	6.09487	13.6691	2.7	-0.847275	-0.260274	0.939		127	2	99.264		0.93	6	0.15263	0.224592	0.399525	0.307017	2.6	-0.123447	-0.0514853	0.939
2A	128	2	100.264		0.13	4	1.9901	1.89241	2.11382	2.17778	0.3	-0.0618591	-0.159547	0.967		128	2	100.264		1	4	4.39229	5.01008	6.04795	13.6866	2.5	-0.827833	-0.210039	0.967		128	2	100.264		1.08	5	0.157025	0.216438	0.410213	0.306291	2.8	-0.126594	-0.0671811	0.967
2A	129	2	100.955	SNP_3575206	0.14	4	1.98875	1.89099	2.11707	2.17745	0.4	-0.0641616	-0.161924	1		129	2	100.955	SNP_3575206	0.97	4	4.39286	5.02424	6.00927	13.7031	2.4	-0.808206	-0.176827	1		129	2	100.955	SNP_3575206	1.17	4	0.160714	0.211765	0.414634	0.306006	2.9	-0.12696	-0.0759095	1
2A	130	2	101.955		0.19	4	2.00031	1.88144	2.14456	2.17481	0.5	-0.0721236	-0.190991	0.998		130	2	101.955		0.83	4	4.49114	4.97974	6.01819	13.7523	2.1	-0.763524	-0.274932	0.998		130	2	101.955		0.87	4	0.166487	0.221056	0.397333	0.308217	2.2	-0.115423	-0.0608536	0.998
2A	131	2	101.984	SNP_1045450	0.19	4	2.00056	1.8814	2.145	2.17477	0.5	-0.0722222	-0.191382	1		131	2	101.984	SNP_1045450	0.82	4	4.49444	4.98033	6.01342	13.7558	2	-0.759488	-0.273599	1		131	2	101.984	SNP_1045450	0.86	4	0.166667	0.222222	0.394737	0.308431	2.1	-0.114035	-0.0584795	1
2A	132	2	102.984		0.18	5	2.02821	1.87337	2.12079	2.17496	0.5	-0.0462905	-0.201134	0.975		132	2	102.984		0.67	4	4.51145	5.01297	5.90181	13.8036	1.7	-0.695181	-0.193661	0.975		132	2	102.984		0.82	4	0.166497	0.22331	0.390689	0.308649	2.1	-0.112096	-0.0552828	0.975
2A	133	2	103.892	SNP_3574952	0.16	4	2.04185	1.87576	2.09333	2.17625	0.4	-0.0257407	-0.191828	1		133	2	103.892	SNP_3574952	0.54	4	4.54833	5.03843	5.77974	13.8548	1.3	-0.615705	-0.125611	1		133	2	103.892	SNP_3574952	0.78	4	0.166667	0.224719	0.384615	0.308991	2	-0.108974	-0.0509219	1
2A	134	2	104.892		0.08	5	2.01742	1.90377	2.06471	2.18065	0.2	-0.023648	-0.137295	0.956		134	2	104.892		0.49	5	4.58076	5.01987	5.77916	13.8625	1.3	-0.5992	-0.160091	0.956		134	2	104.892		0.8	5	0.159602	0.227729	0.387534	0.308485	2.1	-0.113966	-0.045839	0.956
2A	135	2	105.892		0.02	5	1.98925	1.93751	2.03021	2.18398	0.1	-0.0204831	-0.0722185	0.928		135	2	105.892		0.43	5	4.62351	5.00038	5.76429	13.8768	1.2	-0.570392	-0.193518	0.928		135	2	105.892		0.81	6	0.153217	0.231832	0.387368	0.308174	2.2	-0.117075	-0.0384599	0.928
2A	136	2	106.892		0	4	1.95898	1.97524	1.99187	2.18523	0	-0.0164447	-0.000175406	0.918		136	2	106.892		0.37	6	4.67518	4.98217	5.73258	13.897	1	-0.528698	-0.221711	0.918		136	2	106.892		0.81	6	0.147931	0.237003	0.383652	0.308106	2.2	-0.117861	-0.0287886	0.918
2A	137	2	107.892		0.02	5	1.92929	2.01371	1.95302	2.18391	0.1	-0.0118628	0.0725547	0.925		137	2	107.892		0.31	6	4.73239	4.96826	5.68266	13.9219	0.9	-0.475135	-0.239266	0.925		137	2	107.892		0.8	6	0.143992	0.243212	0.376191	0.308292	2.2	-0.1161	-0.0168799	0.925
2A	138	2	108.892		0.08	5	1.90274	2.04939	1.91715	2.18042	0.2	-0.0072018	0.139443	0.948		138	2	108.892		0.25	5	4.79079	4.96104	5.61606	13.9488	0.7	-0.412632	-0.242389	0.948		138	2	108.892		0.78	5	0.141487	0.250231	0.365412	0.308677	2.1	-0.111963	-0.00321822	0.948
2A	139	2	109.892		0.17	4	1.88063	2.07996	1.88654	2.17573	0.4	-0.00295618	0.196373	0.989		139	2	109.892		0.19	4	4.8468	4.9605	5.53815	13.9746	0.5	-0.345673	-0.231976	0.989		139	2	109.892		0.76	4	0.140405	0.257372	0.352758	0.309147	1.9	-0.106176	0.0107906	0.989
2A	140	2	110.106	SNP_3574584	0.19	4	1.87649	2.08573	1.88077	2.17467	0.5	-0.002139	0.207101	1		140	2	110.106	SNP_3574584	0.18	4	4.85825	4.96106	5.52075	13.9797	0.5	-0.331252	-0.228439	1		140	2	110.106	SNP_3574584	0.75	4	0.140351	0.258824	0.35	0.309248	1.9	-0.104825	0.0136481	1
2A	141	2	110.927	SNP_3574733	0.21	4	1.85839	2.08819	1.89615	2.17376	0.5	-0.0188805	0.210919	1		141	2	110.927	SNP_3574733	0.21	4	4.82893	4.96523	5.55025	13.9702	0.5	-0.360661	-0.224357	1		141	2	110.927	SNP_3574733	1.5	4	0.0892857	0.27907	0.375	0.303466	3.7	-0.142857	0.0469269	1
2A	142	2	111.927		0.09	4	1.92555	2.05132	1.88118	2.17998	0.2	0.0221896	0.147951	0.991		142	2	111.927		0.15	4	4.76495	5.08272	5.39462	13.9916	0.4	-0.314838	0.00293147	0.991		142	2	111.927		1.13	5	0.115613	0.263293	0.375207	0.306081	2.9	-0.129797	0.0178833	0.991
2A	143	2	112.041	SNP_1084064	0.09	4	1.93456	2.04573	1.88	2.18057	0.2	0.0272807	0.138451	1		143	2	112.041	SNP_1084064	0.14	4	4.76	5.09541	5.37525	13.9931	0.4	-0.307625	0.0277868	1		143	2	112.041	SNP_1084064	1.08	4	0.122807	0.258824	0.375	0.30671	2.7	-0.126096	0.00992002	1
2A	144	2	113.041		0.08	4	1.90662	2.04811	1.90762	2.18041	0.2	-0.000500221	0.140991	0.962		144	2	113.041		0.19	4	4.67733	5.13744	5.38326	13.9738	0.5	-0.352969	0.107146	0.962		144	2	113.041		1.2	5	0.109346	0.262517	0.380223	0.305515	3.1	-0.135438	0.0177333	0.962
2A	145	2	114.041		0.09	4	1.88113	2.04605	1.93882	2.18001	0.2	-0.0288478	0.13607	0.973		145	2	114.041		0.24	4	4.60652	5.1694	5.38548	13.955	0.6	-0.389483	0.173398	0.973		145	2	114.041		1.31	5	0.0998584	0.263813	0.383615	0.304743	3.3	-0.141878	0.0220769	0.973
2A	146	2	114.587	SNP_3574981	0.1	4	1.86904	2.04307	1.95684	2.17973	0.3	-0.0439018	0.130128	1		146	2	114.587	SNP_3574981	0.27	4	4.57731	5.18033	5.38487	13.9472	0.7	-0.403782	0.19924	1		146	2	114.587	SNP_3574981	1.36	4	0.0961538	0.263736	0.384615	0.304507	3.4	-0.144231	0.0233516	1
2A	147	2	115.587		0.1	5	1.86051	2.04465	1.96425	2.1791	0.3	-0.0518696	0.132274	0.949		147	2	115.587		0.22	5	4.61988	5.1469	5.40804	13.9592	0.6	-0.394081	0.132935	0.949		147	2	115.587		1.21	5	0.10594	0.258886	0.385504	0.305416	3.1	-0.139782	0.0131639	0.949
2A	148	2	116.587		0.11	5	1.85438	2.0442	1.97312	2.17872	0.3	-0.0593693	0.130455	0.92		148	2	116.587		0.17	5	4.69192	5.09867	5.43159	13.9757	0.5	-0.369833	0.036916	0.92		148	2	116.587		1.06	5	0.117948	0.253237	0.385286	0.306485	2.8	-0.133669	0.00162042	0.92
2A	149	2	117.587		0.11	5	1.85105	2.04157	1.98338	2.17863	0.3	-0.0661618	0.124352	0.914		149	2	117.587		0.13	5	4.78667	5.04137	5.4501	13.9913	0.4	-0.331714	-0.0770123	0.914		149	2	117.587		0.91	5	0.132146	0.246962	0.383654	0.307661	2.4	-0.125754	-0.010938	0.914
2A	150	2	118.587		0.11	5	1.8505	2.03697	1.99465	2.17881	0.3	-0.0720731	0.114394	0.931		150	2	118.587		0.11	5	4.88769	4.98631	5.45672	14.001	0.3	-0.284517	-0.185894	0.931		150	2	118.587		0.77	5	0.148013	0.240479	0.380286	0.308861	2	-0.116137	-0.0236706	0.931
2A	151	2	119.587		0.11	4	1.85234	2.03096	2.0063	2.17918	0.3	-0.0769776	0.101635	0.97		151	2	119.587		0.1	4	4.97847	4.94375	5.44776	14.0055	0.3	-0.234649	-0.269367	0.97		151	2	119.587		0.64	4	0.164556	0.234416	0.37491	0.310001	1.6	-0.105177	-0.0353176	0.97
2A	152	2	120.105	SNP_3022831	0.11	4	1.85405	2.02751	2.01224	2.17942	0.3	-0.0790934	0.0943691	1		152	2	120.105	SNP_3022831	0.1	4	5.01855	4.92804	5.43724	14.0067	0.3	-0.209345	-0.299859	1		152	2	120.105	SNP_3022831	0.58	4	0.173026	0.231648	0.371292	0.310548	1.5	-0.0991329	-0.0405107	1
2A	153	2	121.105		0.09	4	1.85862	2.02593	2.00691	2.17992	0.2	-0.0741439	0.0931593	0.951		153	2	121.105		0.1	5	5.05832	4.90642	5.4402	14.0035	0.3	-0.190943	-0.342837	0.951		153	2	121.105		0.64	5	0.166999	0.231296	0.38038	0.309856	1.7	-0.106691	-0.0423939	0.951
2A	154	2	122.105		0.08	5	1.86378	2.02465	2.00006	2.18043	0.2	-0.0681396	0.0927269	0.909		154	2	122.105		0.1	6	5.10351	4.88419	5.43889	13.9993	0.3	-0.167691	-0.387013	0.909		154	2	122.105		0.7	6	0.161303	0.230185	0.390857	0.309045	1.9	-0.114777	-0.0458949	0.909
2A	155	2	123.105		0.07	6	1.86941	2.02385	1.99143	2.18092	0.2	-0.06101	0.093422	0.875		155	2	123.105		0.11	7	5.15288	4.86249	5.43206	13.994	0.4	-0.139586	-0.429982	0.875		155	2	123.105		0.77	6	0.156473	0.228092	0.402662	0.308122	2.2	-0.123094	-0.0514752	0.875
2A	156	2	124.105		0.06	6	1.87538	2.02365	1.98087	2.18134	0.2	-0.0527433	0.0955214	0.849		156	2	124.105		0.11	7	5.20423	4.84303	5.41816	13.9882	0.4	-0.106968	-0.468169	0.849		156	2	124.105		0.85	7	0.152913	0.224961	0.41549	0.307107	2.6	-0.131288	-0.0592409	0.849
2A	157	2	125.105		0.05	6	1.88154	2.02413	1.96835	2.18167	0.2	-0.0434049	0.099189	0.83		157	2	125.105		0.11	8	5.25478	4.82766	5.39574	13.9828	0.4	-0.0704782	-0.497596	0.83		157	2	125.105		0.92	7	0.150876	0.22093	0.428728	0.30604	2.9	-0.138926	-0.0688723	0.83
2A	158	2	126.105		0.05	7	1.88773	2.02532	1.95403	2.18185	0.2	-0.0331511	0.10444	0.818		158	2	126.105		0.11	9	5.30097	4.8186	5.36322	13.979	0.5	-0.0311238	-0.513493	0.818		158	2	126.105		1	8	0.15044	0.216311	0.44151	0.304984	3.2	-0.145535	-0.0796636	0.818
2A	159	2	127.105		0.05	7	1.89385	2.02704	1.93848	2.18188	0.2	-0.0223175	0.110877	0.813		159	2	127.105		0.11	9	5.3393	4.81774	5.31958	13.9782	0.5	0.0098584	-0.511699	0.813		159	2	127.105		1.08	8	0.151517	0.211538	0.452819	0.304027	3.5	-0.150651	-0.09063	0.813
2A	160	2	128.105		0.05	7	1.89979	2.02912	1.92234	2.18174	0.2	-0.0112741	0.118053	0.816		160	2	128.105		0.1	9	5.36734	4.82588	5.26507	13.9809	0.4	0.0511336	-0.49032	0.816		160	2	128.105		1.16	8	0.153871	0.207027	0.461819	0.303257	3.8	-0.153974	-0.100818	0.816
2A	161	2	129.105		0.05	7	1.90549	2.03133	1.90634	2.18146	0.2	-0.000421526	0.125412	0.827		161	2	129.105		0.1	8	5.38394	4.84272	5.2014	13.9867	0.4	0.0912701	-0.449948	0.827		161	2	129.105		1.23	8	0.157166	0.203108	0.467994	0.302736	3.9	-0.155414	-0.109472	0.827
2A	162	2	130.105		0.06	6	1.91089	2.03344	1.89112	2.18108	0.2	0.00988499	0.132429	0.844		162	2	130.105		0.09	8	5.39016	4.86622	5.13227	13.9939	0.4	0.128943	-0.394993	0.844		162	2	130.105		1.29	8	0.161034	0.199988	0.471185	0.302495	4	-0.155076	-0.116121	0.844
2A	163	2	131.105		0.07	6	1.91594	2.03534	1.87709	2.18063	0.2	0.0194239	0.13883	0.869		163	2	131.105		0.08	7	5.38771	4.89395	5.06184	14.001	0.3	0.162936	-0.330819	0.869		163	2	131.105		1.34	7	0.165145	0.197758	0.471509	0.302529	4	-0.153182	-0.120569	0.869
2A	164	2	132.105		0.08	6	1.9206	2.03692	1.86454	2.18016	0.2	0.0280286	0.144349	0.901		164	2	132.105		0.08	6	5.37933	4.92308	4.99435	14.0067	0.3	0.192489	-0.263764	0.901		164	2	132.105		1.37	7	0.169262	0.1964	0.469278	0.302807	3.9	-0.150008	-0.122871	0.901
2A	165	2	133.105		0.09	5	1.92487	2.03813	1.85359	2.1797	0.3	0.0356373	0.148897	0.941		165	2	133.105		0.08	5	5.36742	4.95143	4.93285	14.0104	0.2	0.217287	-0.198708	0.941		165	2	133.105		1.4	6	0.173229	0.195842	0.464875	0.303286	3.8	-0.145823	-0.12321	0.941
2A	166	2	134.105		0.11	4	1.92874	2.03896	1.84424	2.17929	0.3	0.0422484	0.152467	0.988		166	2	134.105		0.09	4	5.35382	4.97762	4.87899	14.0122	0.2	0.237416	-0.138785	0.988		166	2	134.105		1.42	5	0.17697	0.195969	0.458725	0.303918	3.6	-0.140878	-0.121879	0.988
2A	167	2	134.33	SNP_1050727	0.11	4	1.92956	2.03909	1.84235	2.17921	0.3	0.0436013	0.153137	1		167	2	134.33	SNP_1050727	0.09	4	5.35067	4.98314	4.868	14.0124	0.2	0.241333	-0.126196	1		167	2	134.33	SNP_1050727	1.42	4	0.177778	0.196078	0.457143	0.304077	3.5	-0.139683	-0.121382	1
2A	168	2	135.33		0.08	4	1.92429	2.03359	1.8689	2.18062	0.2	0.0276985	0.136992	0.971		168	2	135.33		0.13	5	5.40978	4.98745	4.7872	13.9959	0.3	0.311294	-0.11104	0.971		168	2	135.33		1.35	5	0.162169	0.204158	0.447821	0.304489	3.4	-0.142826	-0.100837	0.971
2A	169	2	136.33		0.06	4	1.92094	2.02618	1.89658	2.18197	0.2	0.0121787	0.117424	0.967		169	2	136.33		0.17	5	5.4449	5.00277	4.71137	13.981	0.4	0.366764	-0.075369	0.967		169	2	136.33		1.29	5	0.147513	0.212232	0.43697	0.304855	3.3	-0.144729	-0.0800097	0.967
2A	170	2	137.33		0.04	4	1.91931	2.01734	1.92415	2.18309	0.1	-0.00241867	0.0956141	0.988		170	2	137.33		0.21	4	5.45344	5.02913	4.64268	13.9695	0.5	0.405379	-0.0189316	0.988		170	2	137.33		1.24	5	0.138098	0.218486	0.424939	0.305334	3.1	-0.14342	-0.0630329	0.988
2A	171	2	137.639	SNP_3574462	0.04	4	1.91909	2.01443	1.93243	2.18338	0.1	-0.00667076	0.0886713	1		171	2	137.639	SNP_3574462	0.22	4	5.45182	5.0388	4.62316	13.9665	0.5	0.41433	0.00131196	1		171	2	137.639	SNP_3574462	1.23	4	0.136364	0.22	0.421053	0.305522	3.1	-0.142344	-0.0587081	1
2A	172	2	138.639		0.02	4	1.92585	2.00696	1.94701	2.18406	0.1	-0.0105821	0.0705279	0.96		172	2	138.639		0.23	4	5.46742	5.03778	4.619	13.9606	0.6	0.42421	-0.00542536	0.96		172	2	138.639		1.2	5	0.133337	0.220466	0.416544	0.305431	3.1	-0.141603	-0.0544743	0.96
2A	173	2	139.639		0.01	4	1.93364	1.99743	1.96329	2.18465	0	-0.0148248	0.0489659	0.941		173	2	139.639		0.23	4	5.47595	5.03747	4.62076	13.9572	0.6	0.427593	-0.0108822	0.941		173	2	139.639		1.16	5	0.131169	0.222101	0.409046	0.305659	3	-0.138938	-0.0480071	0.941
2A	174	2	140.639		0.01	4	1.94206	1.98662	1.97969	2.18503	0	-0.0188144	0.025739	0.942		174	2	140.639		0.23	4	5.47695	5.0382	4.628	13.9566	0.6	0.424472	-0.0142753	0.942		174	2	140.639		1.1	5	0.129937	0.224654	0.399283	0.306136	2.9	-0.134673	-0.0399561	0.942
2A	175	2	141.639		0	4	1.95059	1.97559	1.99444	2.18513	0	-0.0219252	0.00307469	0.965		175	2	141.639		0.23	4	5.47072	5.04005	4.63999	13.9586	0.6	0.415366	-0.0153052	0.965		175	2	141.639		1.04	5	0.129732	0.227825	0.388018	0.306782	2.7	-0.129143	-0.0310505	0.965
2A	176	2	142.493	SNP_3574126	0.01	3	1.95756	1.96674	2.00477	2.18504	0	-0.0236086	-0.0144226	1		176	2	142.493	SNP_3574126	0.23	4	5.46043	5.04242	4.65333	13.9621	0.6	0.403551	-0.0144665	1		176	2	142.493	SNP_3574126	0.99	4	0.130435	0.230769	0.377778	0.307412	2.5	-0.123671	-0.023337	1
2A	177	2	143.493		0.01	4	1.95718	1.95689	2.0254	2.1845	0	-0.034113	-0.0343991	0.948		177	2	143.493		0.27	4	5.43387	5.09975	4.55739	13.9444	0.7	0.438242	0.104123	0.948		177	2	143.493		0.85	5	0.137862	0.231885	0.370943	0.308256	2.2	-0.11654	-0.0225183	0.948
2A	178	2	144.493		0.02	4	1.95171	1.9525	2.04008	2.18394	0.1	-0.0441894	-0.0433962	0.923		178	2	144.493		0.32	5	5.39858	5.16082	4.46801	13.9216	0.9	0.465287	0.227528	0.923		178	2	144.493		0.7	5	0.148279	0.23239	0.361234	0.309338	1.9	-0.106477	-0.0223663	0.923
2A	179	2	145.493		0.03	4	1.93988	1.95497	2.04798	2.18353	0.1	-0.0540506	-0.0389595	0.926		179	2	145.493		0.39	5	5.35783	5.22028	4.39398	13.8969	1	0.481923	0.34437	0.926		179	2	145.493		0.55	5	0.162286	0.231338	0.349795	0.31055	1.5	-0.0937542	-0.024703	0.926
2A	180	2	146.493		0.04	4	1.92524	1.9628	2.04938	2.18324	0.1	-0.0620693	-0.0245112	0.955		180	2	146.493		0.46	5	5.31647	5.27343	4.33944	13.874	1.2	0.488517	0.445473	0.955		180	2	146.493		0.43	5	0.179107	0.228308	0.337891	0.311708	1.1	-0.0793922	-0.0301908	0.955
2A	181	2	147.262	SNP_3575236	0.04	4	1.91572	1.97042	2.04654	2.18307	0.1	-0.0654099	-0.0107149	0.997		181	2	147.262	SNP_3575236	0.52	4	5.28793	5.30731	4.3113	13.8598	1.3	0.488319	0.507692	0.997		181	2	147.262	SNP_3575236	0.34	4	0.19225	0.225131	0.329027	0.312443	0.9	-0.0683884	-0.0355074	0.997
2A	182	2	148.262		0.06	5	1.88724	1.9856	2.0479	2.18189	0.2	-0.0803311	0.0180296	0.947		182	2	148.262		0.41	5	5.40243	5.19577	4.38167	13.8891	1.1	0.510381	0.303723	0.947		182	2	148.262		0.44	5	0.18136	0.225204	0.341774	0.311585	1.1	-0.080207	-0.036363	0.947
2A	183	2	149.262		0.09	6	1.85142	2.00395	2.04645	2.17968	0.3	-0.0975142	0.0550155	0.913		183	2	149.262		0.37	5	5.53467	5.07706	4.4737	13.9004	1	0.530486	0.0728754	0.913		183	2	149.262		0.55	5	0.169999	0.224911	0.355242	0.310563	1.5	-0.0926216	-0.0377098	0.913
2A	184	2	150.262		0.13	6	1.81162	2.02301	2.04241	2.17633	0.4	-0.115393	0.0959907	0.895		184	2	150.262		0.4	5	5.67484	4.95878	4.58489	13.8883	1.1	0.544976	-0.171088	0.895		184	2	150.262		0.67	5	0.158973	0.22406	0.369006	0.309421	1.8	-0.105017	-0.0399297	0.895
2A	185	2	151.262		0.19	6	1.77333	2.03971	2.03654	2.17236	0.6	-0.131607	0.134777	0.892		185	2	151.262		0.48	6	5.8108	4.84958	4.70742	13.8532	1.4	0.551692	-0.409534	0.892		185	2	151.262		0.81	5	0.148966	0.222677	0.382407	0.308236	2.2	-0.11672	-0.0430098	0.892
2A	186	2	152.262		0.25	6	1.7402	2.05249	2.02971	2.16852	0.8	-0.144754	0.167539	0.905		186	2	152.262		0.61	6	5.93102	4.75772	4.82855	13.8031	1.7	0.551236	-0.622065	0.905		186	2	152.262		0.95	5	0.140329	0.22101	0.394624	0.307103	2.6	-0.127147	-0.046467	0.905
2A	187	2	153.262		0.32	5	1.71298	2.0614	2.02257	2.16527	0.9	-0.154791	0.193629	0.933		187	2	153.262		0.77	5	6.02753	4.68866	4.93528	13.7508	2.1	0.546127	-0.792746	0.933		187	2	153.262		1.09	5	0.133102	0.219407	0.404834	0.30612	2.9	-0.135866	-0.0495608	0.933
2A	188	2	154.262		0.39	4	1.69101	2.06711	2.01556	2.16277	1	-0.162275	0.213819	0.977		188	2	154.262		0.93	5	6.09676	4.64399	5.01882	13.7088	2.4	0.538972	-0.913806	0.977		188	2	154.262		1.23	5	0.127155	0.218177	0.412373	0.305366	3.1	-0.142609	-0.0515874	0.977
2A	189	2	154.681	SNP_982801	0.42	4	1.68316	2.0687	2.01275	2.16194	1.1	-0.164796	0.220746	1		189	2	154.681	SNP_982801	0.99	4	6.1175	4.63228	5.04585	13.6963	2.5	0.535823	-0.9494	1		189	2	154.681	SNP_982801	1.28	4	0.125	0.217822	0.414634	0.305133	3.2	-0.144817	-0.0519953	1
2A	190	2	155.681		0.47	4	1.67541	2.08575	1.99671	2.15881	1.2	-0.160654	0.249693	0.974		190	2	155.681		0.86	4	6.06523	4.70531	4.86641	13.7386	2.2	0.599408	-0.760509	0.974		190	2	155.681		1.04	5	0.135477	0.219546	0.393211	0.306905	2.6	-0.128867	-0.044798	0.974
2A	191	2	156.243	SNP_1077755	0.49	4	1.67475	2.09309	1.99091	2.15769	1.3	-0.15808	0.260256	1		191	2	156.243	SNP_1077755	0.8	4	6.02143	4.75642	4.77067	13.7616	2	0.625381	-0.639627	1		191	2	156.243	SNP_1077755	0.89	4	0.142857	0.221053	0.377778	0.308124	2.2	-0.11746	-0.0392648	1
2A	192	2	157.243		0.52	5	1.65536	2.10716	1.96603	2.15385	1.4	-0.155333	0.296463	0.956		192	2	157.243		0.97	5	6.17482	4.70232	4.79233	13.6821	2.6	0.691245	-0.781259	0.956		192	2	157.243		1.07	6	0.142186	0.20684	0.404058	0.305737	3	-0.130936	-0.0662816	0.956
2A	193	2	158.243		0.53	6	1.64554	2.11703	1.94173	2.15146	1.6	-0.148092	0.323391	0.93		193	2	158.243		1.15	6	6.32059	4.65732	4.81143	13.6016	3.1	0.754582	-0.90869	0.93		193	2	158.243		1.23	7	0.14242	0.196865	0.421202	0.303853	3.6	-0.139391	-0.0849456	0.93
2A	194	2	159.243		0.54	6	1.64515	2.12201	1.92025	2.15082	1.6	-0.137549	0.339315	0.921		194	2	159.243		1.31	6	6.44504	4.62584	4.82589	13.5324	3.6	0.809576	-1.00962	0.921		194	2	159.243		1.34	7	0.14311	0.191549	0.428477	0.302927	3.9	-0.142683	-0.0942445	0.921
2A	195	2	160.243		0.53	6	1.65312	2.12224	1.90266	2.1519	1.5	-0.124768	0.344352	0.928		195	2	160.243		1.45	6	6.53843	4.60992	4.83469	13.4851	4	0.851871	-1.07664	0.928		195	2	160.243		1.41	6	0.144093	0.189271	0.428933	0.302767	3.9	-0.14242	-0.0972416	0.928
2A	196	2	161.243		0.51	5	1.66841	2.11834	1.88895	2.15442	1.4	-0.110272	0.339666	0.953		196	2	161.243		1.56	5	6.59439	4.60991	4.83777	13.466	4.1	0.878309	-1.10617	0.953		196	2	161.243		1.44	5	0.145344	0.188912	0.424814	0.303141	3.8	-0.139735	-0.0961672	0.953
2A	197	2	162.243		0.48	4	1.68999	2.11126	1.87856	2.15793	1.3	-0.0942859	0.326988	0.995		197	2	162.243		1.61	4	6.60472	4.62609	4.83552	13.48	4	0.884598	-1.09403	0.995		197	2	162.243		1.43	4	0.146884	0.189848	0.417543	0.303874	3.6	-0.135329	-0.0923656	0.995
2A	198	2	162.345	SNP_1138413	0.48	4	1.6925	2.1104	1.87766	2.15833	1.2	-0.0925798	0.325324	1		198	2	162.345	SNP_1138413	1.61	4	6.60265	4.6287	4.835	13.4835	4	0.883824	-1.09012	1		198	2	162.345	SNP_1138413	1.43	4	0.147059	0.19	0.416667	0.303964	3.6	-0.134804	-0.0918627	1
2A	199	2	163.345		0.37	6	1.75328	2.11447	1.85759	2.16169	1.1	-0.0521564	0.309035	0.962		199	2	163.345		1.45	5	6.5265	4.6405	4.76647	13.498	3.9	0.880016	-1.00598	0.962		199	2	163.345		1.4	5	0.145875	0.189992	0.411028	0.304044	3.5	-0.132577	-0.0884597	0.962
2A	200	2	164.345		0.24	5	1.8672	2.09313	1.84035	2.17073	0.7	0.0134239	0.239351	0.977		200	2	164.345		1.18	5	6.29876	4.71038	4.7008	13.6134	3.1	0.79898	-0.789403	0.977		200	2	164.345		1.33	4	0.145937	0.191954	0.401221	0.304669	3.3	-0.127642	-0.0816248	0.977
2A	201	2	164.769	SNP_1216892	0.21	4	1.91667	2.08034	1.83373	2.17342	0.5	0.0414706	0.205145	1		201	2	164.769	SNP_1216892	1.05	4	6.1778	4.7542	4.67509	13.6738	2.6	0.751355	-0.672245	1		201	2	164.769	SNP_1216892	1.29	4	0.146341	0.193182	0.396226	0.305039	3.2	-0.124942	-0.0781021	1
2A	202	2	165.769		0.29	5	1.84317	2.10821	1.84825	2.16821	0.8	-0.00254306	0.262501	0.963		202	2	165.769		1.11	5	6.25563	4.79315	4.58001	13.6246	3	0.83781	-0.624663	0.963		202	2	165.769		1.53	5	0.147514	0.179829	0.408956	0.30295	3.9	-0.130721	-0.0984059	0.963
2A	203	2	166.428	SNP_3574944	0.34	4	1.81421	2.11686	1.85833	2.166	0.9	-0.0220594	0.28059	1		203	2	166.428	SNP_3574944	1.04	4	6.1547	4.88221	4.52467	13.6772	2.6	0.815015	-0.457479	1		203	2	166.428	SNP_3574944	1.64	4	0.149997	0.174418	0.410723	0.302402	4.1	-0.130363	-0.105942	1
2A	204	2	167.428		0.26	4	1.84026	2.10054	1.8614	2.17	0.7	-0.0105679	0.249708	0.966		204	2	167.428		1.23	5	6.31582	4.85589	4.49383	13.5917	3.2	0.910995	-0.548933	0.966		204	2	167.428		1.47	5	0.142133	0.182352	0.401831	0.303461	3.7	-0.129849	-0.0896298	0.966
2A	205	2	168.421	SNP_3574367	0.18	4	1.87286	2.07659	1.87364	2.17504	0.5	-0.00038961	0.203344	1		205	2	168.421	SNP_3574367	1.33	4	6.37811	4.8258	4.54	13.5793	3.3	0.919054	-0.633259	1		205	2	168.421	SNP_3574367	1.27	4	0.135135	0.193182	0.385965	0.305214	3.2	-0.125415	-0.0673682	1
2A	206	2	169.421		0.07	4	1.91531	2.03473	1.90567	2.18144	0.2	0.00482211	0.124236	0.995		206	2	169.421		1.42	4	6.42912	4.85116	4.47492	13.5475	3.5	0.977098	-0.600856	0.995		206	2	169.421		1.23	4	0.138368	0.19472	0.38946	0.305422	3.1	-0.125546	-0.0691943	0.995
2A	207	2	169.573	SNP_997933	0.06	4	1.92265	2.02815	1.91115	2.1822	0.1	0.00574661	0.111252	1		207	2	169.573	SNP_997933	1.43	4	6.43583	4.85402	4.4663	13.5432	3.6	0.984769	-0.597043	1		207	2	169.573	SNP_997933	1.22	4	0.138889	0.195652	0.388889	0.305589	3	-0.125	-0.0682367	1
2A	208	2	170.573		0.05	5	1.93173	2.02653	1.9075	2.18232	0.1	0.0121145	0.10692	0.959		208	2	170.573		1.4	5	6.44628	4.86821	4.43213	13.5285	3.7	1.00708	-0.570992	0.959		208	2	170.573		1.26	5	0.141028	0.190587	0.397704	0.304684	3.3	-0.128338	-0.0787789	0.959
2A	209	2	171.573		0.04	5	1.94168	2.02421	1.9045	2.18247	0.1	0.0185866	0.101117	0.923		209	2	171.573		1.37	6	6.44744	4.88709	4.39589	13.5182	3.7	1.02578	-0.534573	0.923		209	2	171.573		1.29	6	0.143259	0.185956	0.405944	0.303801	3.6	-0.131343	-0.0886454	0.923
2A	210	2	172.573		0.04	6	1.95245	2.0211	1.90235	2.18265	0.1	0.0250469	0.0936981	0.893		210	2	172.573		1.33	6	6.43799	4.91087	4.35801	13.513	3.8	1.03999	-0.487129	0.893		210	2	172.573		1.32	7	0.145546	0.181922	0.413294	0.302992	3.9	-0.133874	-0.0974979	0.893
2A	211	2	173.573		0.03	6	1.96398	2.01713	1.90127	2.18287	0.1	0.0313569	0.0845064	0.868		211	2	173.573		1.29	7	6.41691	4.93943	4.31928	13.5132	3.8	1.04882	-0.428663	0.868		211	2	173.573		1.34	7	0.147857	0.178585	0.419513	0.302304	4.1	-0.135828	-0.1051	0.868
2A	212	2	174.573		0.03	7	1.97617	2.01229	1.90138	2.1831	0.1	0.037396	0.0735151	0.849		212	2	174.573		1.25	7	6.38345	4.97239	4.28071	13.5189	3.7	1.05137	-0.359687	0.849		212	2	174.573		1.35	8	0.150163	0.175989	0.424441	0.301769	4.3	-0.137139	-0.111313	0.849
2A	213	2	175.573		0.02	7	1.9889	2.00656	1.90284	2.18334	0.1	0.0430273	0.0606878	0.836		213	2	175.573		1.2	7	6.33753	5.00895	4.24368	13.5296	3.7	1.04693	-0.281655	0.836		213	2	175.573		1.35	8	0.152437	0.174172	0.427926	0.301419	4.4	-0.137744	-0.116009	0.836
2A	214	2	176.573		0.02	7	2.00199	2.00002	1.90565	2.18355	0.1	0.048167	0.0461998	0.828		214	2	176.573		1.16	7	6.27976	5.04794	4.20966	13.5448	3.6	1.03505	-0.196769	0.828		214	2	176.573		1.33	8	0.154658	0.173165	0.42984	0.301278	4.4	-0.137591	-0.119085	0.828
2A	215	2	177.573		0.02	7	2.01523	1.99283	1.90968	2.1837	0.1	0.052775	0.0303723	0.826		215	2	177.573		1.11	7	6.21155	5.08794	4.18017	13.5636	3.4	1.01569	-0.107914	0.826		215	2	177.573		1.31	9	0.156808	0.173006	0.43006	0.301365	4.4	-0.136626	-0.120429	0.826
2A	216	2	178.573		0.02	7	2.02841	1.98523	1.91466	2.18376	0.1	0.0568712	0.0136948	0.829		216	2	178.573		1.06	7	6.1351	5.12735	4.15654	13.5851	3.3	0.989279	-0.0184658	0.829		216	2	178.573		1.27	9	0.158871	0.173764	0.42843	0.3017	4.3	-0.13478	-0.119887	0.829
2A	217	2	179.573		0.02	6	2.04127	1.9775	1.92024	2.1837	0.1	0.0605173	-0.00325245	0.837		217	2	179.573		1.02	6	6.05312	5.1645	4.13993	13.6083	3.1	0.956597	0.067976	0.837		217	2	179.573		1.22	9	0.160838	0.175511	0.424814	0.302295	4.1	-0.131988	-0.117315	0.837
2A	218	2	180.573		0.03	6	2.05357	1.97001	1.92588	2.18351	0.1	0.063846	-0.019718	0.852		218	2	180.573		0.98	6	5.96884	5.19781	4.13117	13.6328	2.9	0.918833	0.147799	0.852		218	2	180.573		1.15	8	0.162703	0.178332	0.419075	0.303151	3.8	-0.128186	-0.112557	0.852
2A	219	2	181.573		0.03	5	2.06511	1.96299	1.93124	2.18321	0.1	0.0669315	-0.0351853	0.871		219	2	181.573		0.94	6	5.88508	5.22598	4.13094	13.6582	2.7	0.877073	0.217972	0.871		219	2	181.573		1.08	8	0.164474	0.182268	0.411164	0.304247	3.5	-0.123345	-0.105551	0.871
2A	220	2	182.573		0.04	5	2.0757	1.95668	1.93599	2.18283	0.1	0.0698558	-0.0491661	0.896		220	2	182.573		0.9	6	5.80435	5.24804	4.13969	13.6848	2.6	0.832331	0.276026	0.896		220	2	182.573		0.99	7	0.16617	0.187286	0.401166	0.305532	3.1	-0.117498	-0.0963818	0.896
2A	221	2	183.573		0.05	4	2.08524	1.95119	1.93997	2.18241	0.1	0.0726349	-0.061415	0.927		221	2	183.573		0.86	5	5.72847	5.2634	4.15773	13.713	2.4	0.785369	0.320306	0.927		221	2	183.573		0.9	7	0.167824	0.193156	0.389496	0.30691	2.6	-0.110836	-0.0855044	0.927
2A	222	2	184.573		0.06	4	2.09365	1.94657	1.94313	2.18197	0.2	0.0752613	-0.0718275	0.964		222	2	184.573		0.82	5	5.6585	5.27193	4.18507	13.7428	2.1	0.736718	0.35015	0.964		222	2	184.573		0.82	5	0.169475	0.199464	0.376881	0.308261	2.2	-0.103703	-0.0737142	0.964
2A	223	2	185.383	SNP_3574704	0.07	4	2.09961	1.94344	1.9451	2.18162	0.2	0.0772567	-0.0789158	0.997		223	2	185.383	SNP_3574704	0.78	4	5.60654	5.27397	4.21385	13.7681	2	0.696341	0.363775	0.997		223	2	185.383	SNP_3574704	0.75	4	0.170837	0.204548	0.366582	0.309261	1.9	-0.0978725	-0.0641608	0.997

## Sheet: C3
Chrromosome	48hai	Intervall (0.95)	2.9													72hai	Intervall (0.95)	2.9													Macro	Intervall (0.95)	2.7
	Nr	Group	Position	Locus	LOD	# Iter.	mu_A	mu_H	mu_B	Variance	% Expl.	Additive	Dominance	GIC		Nr	Group	Position	Locus	LOD	# Iter.	mu_A	mu_H	mu_B	Variance	% Expl.	Additive	Dominance	GIC		Nr	Group	Position	Locus	LOD	# Iter.	mu_A	mu_H	mu_B	Variance	% Expl.	Additive	Dominance	GIC
3A	1	3	0	SNP_1006353	1.01	4	2.01816	2.15769	1.59796	2.12878	2.6	0.210099	0.349634	1		1	3	0	SNP_1006353	0.11	4	5.21925	4.86065	5.2698	14.0059	0.3	-0.025275	-0.383873	1		1	3	0	SNP_1006353	0.46	4	0.2	0.206522	0.34	0.311517	1.2	-0.07	-0.0634783	1
3A	2	3	1		1.5	6	2.01506	2.20214	1.48679	2.0947	4.1	0.264139	0.45122	0.967		2	3	1		0.22	4	5.30643	4.77649	5.38307	13.9612	0.6	-0.038321	-0.568255	0.967		2	3	1		0.41	5	0.20334	0.20725	0.339909	0.311677	1.1	-0.0682842	-0.064375	0.967
3A	3	3	2		1.86	5	2.01306	2.21708	1.44033	2.07937	4.9	0.286369	0.490386	0.982		3	3	2		0.31	4	5.34591	4.73485	5.4524	13.9306	0.8	-0.0532469	-0.664308	0.982		3	3	2		0.31	5	0.204975	0.214265	0.327584	0.312575	0.8	-0.0613048	-0.0520142	0.982
3A	4	3	2.366	SNP_1684036	1.95	4	2.01278	2.21792	1.43391	2.0776	4.9	0.289432	0.494571	1		4	3	2.366	SNP_1684036	0.33	4	5.34795	4.73187	5.45979	13.9278	0.8	-0.0559193	-0.671993	1		4	3	2.366	SNP_1684036	0.27	4	0.205128	0.21875	0.319149	0.313066	0.7	-0.0570104	-0.0433886	1
3A	5	3	3.366		1.94	6	1.96313	2.23219	1.43158	2.07338	5.1	0.265778	0.534831	0.951		5	3	3.366		0.39	5	5.33002	4.69933	5.56458	13.8938	1.1	-0.117283	-0.747968	0.951		5	3	3.366		0.25	5	0.197821	0.222621	0.318025	0.313095	0.7	-0.0601018	-0.0353019	0.951
3A	6	3	4.366		1.86	7	1.9356	2.23339	1.44	2.07521	5	0.247803	0.54559	0.935		6	3	4.366		0.44	5	5.29055	4.68463	5.64494	13.8699	1.2	-0.177198	-0.783116	0.935		6	3	4.366		0.23	5	0.192955	0.225737	0.315586	0.313169	0.6	-0.0613158	-0.0285336	0.935
3A	7	3	5.366		1.71	6	1.94243	2.21768	1.46202	2.08568	4.6	0.240206	0.515452	0.95		7	3	5.366		0.48	5	5.22911	4.68911	5.69363	13.8617	1.3	-0.23226	-0.772253	0.95		7	3	5.366		0.22	5	0.190908	0.228582	0.31095	0.313349	0.6	-0.0600208	-0.0223472	0.95
3A	8	3	6.35	SNP_100002097	1.5	4	1.97025	2.19018	1.49935	2.10226	3.8	0.235447	0.455378	0.996		8	3	6.35	SNP_100002097	0.5	4	5.15317	4.70898	5.71147	13.8673	1.3	-0.279147	-0.723339	0.996		8	3	6.35	SNP_100002097	0.19	4	0.191264	0.231501	0.304019	0.313628	0.5	-0.0563775	-0.0161397	0.996
3A	9	3	7.35		2.09	5	1.99054	2.24019	1.43176	2.06889	5.3	0.279386	0.52904	0.985		9	3	7.35		0.26	4	5.09171	4.79604	5.52157	13.9504	0.7	-0.214931	-0.510601	0.985		9	3	7.35		0.25	4	0.181297	0.232388	0.308148	0.313182	0.6	-0.0634254	-0.0123342	0.985
3A	10	3	7.551	SNP_1103335	2.2	4	1.99972	2.245	1.42333	2.06468	5.5	0.288194	0.533472	1		10	3	7.551	SNP_1103335	0.22	4	5.0759	4.82	5.47755	13.9669	0.5	-0.200827	-0.456724	1		10	3	7.551	SNP_1103335	0.25	4	0.179487	0.234043	0.306122	0.313202	0.6	-0.0633176	-0.00876226	1
3A	11	3	8.551		1.84	5	2.02573	2.21731	1.45577	2.08034	4.8	0.284982	0.476557	0.953		11	3	8.551		0.27	5	5.17148	4.76608	5.51443	13.9401	0.7	-0.171472	-0.57687	0.953		11	3	8.551		0.36	5	0.185797	0.218909	0.328604	0.312221	0.9	-0.0714038	-0.0382916	0.953
3A	12	3	9.551		1.49	5	2.0802	2.17584	1.50095	2.10015	3.9	0.289624	0.385268	0.952		12	3	9.551		0.3	5	5.24158	4.74354	5.51279	13.9284	0.8	-0.135605	-0.633638	0.952		12	3	9.551		0.51	5	0.193296	0.205706	0.347186	0.310999	1.3	-0.0769452	-0.0645345	0.952
3A	13	3	10.551		1.17	4	2.13822	2.12892	1.55928	2.12011	3	0.289469	0.280171	0.998		13	3	10.551		0.28	4	5.2751	4.75996	5.46184	13.9424	0.7	-0.0933709	-0.60851	0.998		13	3	10.551		0.67	4	0.199868	0.196059	0.359779	0.309903	1.7	-0.0799551	-0.0837642	0.998
3A	14	3	10.575	SNP_1087067	1.16	4	2.13937	2.12784	1.56082	2.12056	3	0.289279	0.277739	1		14	3	10.575	SNP_1087067	0.28	4	5.27543	4.76082	5.46	13.9431	0.7	-0.0922857	-0.60689	1		14	3	10.575	SNP_1087067	0.67	4	0.2	0.195876	0.36	0.309881	1.7	-0.08	-0.0841237	1
3A	15	3	11.575		1.25	5	2.06492	2.16669	1.55259	2.11413	3.3	0.256163	0.357934	0.946		15	3	11.575		0.29	5	5.30751	4.73144	5.4542	13.9319	0.8	-0.0733462	-0.649413	0.946		15	3	11.575		0.6	5	0.17664	0.207735	0.352083	0.310315	1.5	-0.0877215	-0.0566263	0.946
3A	16	3	12.575		1.37	5	1.99752	2.20616	1.55031	2.10609	3.6	0.223604	0.43225	0.926		16	3	12.575		0.29	5	5.32599	4.71243	5.43311	13.9284	0.8	-0.0535564	-0.66712	0.926		16	3	12.575		0.58	5	0.158527	0.219055	0.344085	0.310435	1.5	-0.0927787	-0.0322507	0.926
3A	17	3	13.575		1.51	5	1.94569	2.24099	1.55488	2.09856	4	0.195406	0.490701	0.942		17	3	13.575		0.28	5	5.33	4.70755	5.3957	13.9345	0.8	-0.0328514	-0.655306	0.942		17	3	13.575		0.59	5	0.14583	0.229759	0.335922	0.31041	1.5	-0.095046	-0.0111168	0.942
3A	18	3	14.575		1.64	4	1.91114	2.2671	1.56763	2.09428	4.2	0.171752	0.52771	0.993		18	3	14.575		0.26	4	5.32257	4.71683	5.34506	13.9487	0.7	-0.0112458	-0.616979	0.993		18	3	14.575		0.62	4	0.137078	0.23997	0.328025	0.3103	1.5	-0.0954734	0.00741829	0.993
3A	19	3	14.676	SNP_3574257	1.65	4	1.90854	2.26916	1.56944	2.09411	4.2	0.169546	0.530166	1		19	3	14.676	SNP_3574257	0.26	4	5.32136	4.71843	5.33945	13.9504	0.7	-0.00904545	-0.611975	1		19	3	14.676	SNP_3574257	0.62	4	0.136364	0.240964	0.327273	0.310284	1.6	-0.0954545	0.00914567	1
3A	20	3	15.676		1.62	6	1.8826	2.27218	1.55908	2.09004	4.4	0.161762	0.551345	0.942		20	3	15.676		0.2	5	5.38362	4.75547	5.25986	13.9637	0.6	0.0618793	-0.56627	0.942		20	3	15.676		0.6	6	0.127402	0.247052	0.324927	0.310057	1.6	-0.0987625	0.0208877	0.942
3A	21	3	16.676		1.56	6	1.86543	2.26757	1.55669	2.09035	4.3	0.154368	0.556512	0.905		21	3	16.676		0.17	6	5.45627	4.79664	5.15693	13.9713	0.5	0.149669	-0.509964	0.905		21	3	16.676		0.57	7	0.12099	0.252599	0.320498	0.309994	1.6	-0.0997542	0.0318554	0.905
3A	22	3	17.676		1.46	6	1.85743	2.25658	1.56106	2.09452	4.2	0.148187	0.547335	0.888		22	3	17.676		0.18	6	5.54085	4.83152	5.04528	13.9655	0.6	0.247785	-0.46155	0.888		22	3	17.676		0.52	7	0.119121	0.256523	0.314596	0.310195	1.6	-0.0977374	0.0396642	0.888
3A	23	3	18.676		1.34	6	1.85777	2.24031	1.57216	2.10197	3.8	0.142806	0.525346	0.892		23	3	18.676		0.22	6	5.62709	4.85629	4.94146	13.9471	0.7	0.342815	-0.427977	0.892		23	3	18.676		0.45	7	0.123647	0.257902	0.307909	0.310749	1.4	-0.0921309	0.0421237	0.892
3A	24	3	19.676		1.2	6	1.86545	2.21932	1.59098	2.11224	3.3	0.137236	0.491104	0.917		24	3	19.676		0.29	6	5.69882	4.87566	4.85287	13.9244	0.8	0.422971	-0.400181	0.917		24	3	19.676		0.36	7	0.136909	0.255714	0.301046	0.311713	1.1	-0.0820682	0.0367368	0.917
3A	25	3	20.676		1.04	5	1.87926	2.19391	1.61886	2.12476	2.8	0.130203	0.444848	0.963		25	3	20.676		0.37	5	5.74623	4.89516	4.77936	13.9051	1	0.483438	-0.36763	0.963		25	3	20.676		0.26	6	0.159613	0.249466	0.294753	0.312922	0.7	-0.0675703	0.0222826	0.963
3A	26	3	21.276	SNP_1088933	0.94	4	1.88974	2.17688	1.64	2.13289	2.4	0.124868	0.412013	1		26	3	21.276	SNP_1088933	0.42	4	5.76275	4.90777	4.74167	13.8964	1	0.510542	-0.344442	1		26	3	21.276	SNP_1088933	0.21	4	0.175	0.244681	0.291667	0.313539	0.5	-0.0583333	0.0113475	1
3A	27	3	22.276		0.69	5	1.94778	2.1476	1.66323	2.14325	1.9	0.142276	0.342094	0.96		27	3	22.276		0.52	4	5.85721	4.92596	4.65367	13.8524	1.4	0.601772	-0.329481	0.96		27	3	22.276		0.18	5	0.189301	0.232937	0.299436	0.313638	0.5	-0.0550673	-0.011432	0.96
3A	28	3	23.276		0.49	6	2.02361	2.10615	1.69792	2.15435	1.4	0.162849	0.245384	0.945		28	3	23.276		0.65	5	5.94775	4.94242	4.58165	13.8053	1.7	0.68305	-0.322285	0.945		28	3	23.276		0.18	5	0.207206	0.2208	0.304654	0.313582	0.5	-0.0487236	-0.0351297	0.945
3A	29	3	24.276		0.36	5	2.10412	2.05543	1.74542	2.16324	1	0.179348	0.130654	0.957		29	3	24.276		0.79	4	6.03398	4.9532	4.52981	13.7585	2	0.752087	-0.328695	0.957		29	3	24.276		0.21	5	0.225837	0.210316	0.306047	0.313415	0.6	-0.0401049	-0.0556265	0.957
3A	30	3	25.276		0.31	4	2.17014	2.00602	1.79622	2.16757	0.8	0.18696	0.0228407	0.994		30	3	25.276		0.93	4	6.11663	4.95466	4.49983	13.7147	2.3	0.808403	-0.353569	0.994		30	3	25.276		0.24	4	0.241754	0.202862	0.303963	0.313252	0.6	-0.0311046	-0.0699964	0.994
3A	31	3	25.384	SNP_1257030	0.31	4	2.176	2.00125	1.80127	2.16776	0.8	0.187364	0.0126136	1		31	3	25.384	SNP_1257030	0.95	4	6.12541	4.95416	4.49786	13.7102	2.4	0.813774	-0.357474	1		31	3	25.384	SNP_1257030	0.24	4	0.243243	0.202247	0.303571	0.31324	0.6	-0.0301641	-0.0711601	1
3A	32	3	26.384		0.2	4	2.10701	2.01443	1.81828	2.17373	0.5	0.144361	0.051784	0.972		32	3	26.384		0.99	5	6.12023	4.9947	4.40838	13.6822	2.6	0.855926	-0.269608	0.972		32	3	26.384		0.21	5	0.228757	0.209584	0.303715	0.313482	0.5	-0.0374789	-0.0566513	0.972
3A	33	3	27.384		0.13	4	2.03591	2.02755	1.83817	2.17775	0.3	0.0988713	0.0905109	0.997		33	3	27.384		0.99	4	6.04163	5.05064	4.34563	13.6937	2.5	0.848003	-0.142994	0.997		33	3	27.384		0.19	4	0.211352	0.219266	0.302036	0.313674	0.5	-0.0453424	-0.0374274	0.997
3A	34	3	27.442	SNP_3030175	0.13	4	2.03194	2.02822	1.83942	2.17792	0.3	0.0962607	0.0925385	1		34	3	27.442	SNP_3030175	0.99	4	6.03526	5.05407	4.34302	13.6954	2.5	0.846122	-0.135075	1		34	3	27.442	SNP_3030175	0.19	4	0.210526	0.21978	0.301887	0.313681	0.5	-0.0456802	-0.0364263	1
3A	35	3	28.442		0.09	5	2.02348	2.02124	1.85199	2.17952	0.3	0.0857482	0.0835041	0.962		35	3	28.442		0.79	4	5.99797	5.00666	4.44899	13.7568	2	0.774492	-0.216819	0.962		35	3	28.442		0.22	6	0.204147	0.217214	0.313228	0.313134	0.6	-0.0545407	-0.0414735	0.962
3A	36	3	29.442		0.05	5	2.01472	2.00477	1.88485	2.18237	0.1	0.0649342	0.0549893	0.974		36	3	29.442		0.6	4	5.92632	4.9595	4.58989	13.8276	1.5	0.668214	-0.298605	0.974		36	3	29.442		0.22	5	0.197649	0.221984	0.311782	0.313239	0.6	-0.0570664	-0.0327312	0.974
3A	37	3	29.964	SNP_1101516	0.03	4	2.00971	1.99531	1.90542	2.18362	0.1	0.0521446	0.0377512	1		37	3	29.964	SNP_1101516	0.51	4	5.87333	4.93969	4.67041	13.8642	1.3	0.601463	-0.33218	1		37	3	29.964	SNP_1101516	0.21	4	0.194444	0.226804	0.306122	0.313502	0.5	-0.055839	-0.0234793	1
3A	38	3	30.964		0.02	4	1.98431	1.99589	1.92438	2.18442	0	0.0299606	0.0415482	0.954		38	3	30.964		0.5	5	5.87867	4.92768	4.66393	13.8526	1.4	0.60737	-0.343613	0.954		38	3	30.964		0.16	6	0.204429	0.225941	0.299598	0.313841	0.4	-0.0475847	-0.0260719	0.954
3A	39	3	31.964		0.01	5	1.95986	1.9953	1.94569	2.18487	0	0.0070856	0.0425287	0.945		39	3	31.964		0.47	5	5.82635	4.93763	4.66085	13.8641	1.3	0.582749	-0.305967	0.945		39	3	31.964		0.13	4	0.220822	0.222084	0.292952	0.314152	0.3	-0.0360648	-0.0348028	0.945
3A	40	3	32.964		0.01	4	1.94046	1.99259	1.96735	2.18494	0	-0.0134471	0.0386887	0.973		40	3	32.964		0.41	5	5.73079	4.96776	4.66131	13.892	1.1	0.534737	-0.228289	0.973		40	3	32.964		0.1	5	0.234243	0.21887	0.286268	0.314342	0.3	-0.0260125	-0.0413853	0.973
3A	41	3	33.452	SNP_1721979	0.01	3	1.93325	1.99058	1.97731	2.18486	0	-0.0220288	0.0353025	1		41	3	33.452	SNP_1721979	0.39	4	5.67714	4.98678	4.66321	13.9074	1	0.506968	-0.183394	1		41	3	33.452	SNP_1721979	0.1	4	0.238095	0.218391	0.283019	0.314419	0.2	-0.0224618	-0.0421662	1
3A	42	3	34.452		0	4	1.95785	1.96543	2.00025	2.18508	0	-0.0211983	-0.0136177	0.945		42	3	34.452		0.5	5	5.79504	4.95027	4.6186	13.8553	1.3	0.588222	-0.256549	0.945		42	3	34.452		0.06	5	0.241846	0.22162	0.274951	0.314667	0.2	-0.0165529	-0.0367782	0.945
3A	43	3	35.452		0.02	6	1.98606	1.93337	2.03136	2.18359	0.1	-0.0226503	-0.0753396	0.9		43	3	35.452		0.62	6	5.92041	4.906	4.57761	13.7904	1.8	0.671398	-0.343008	0.9		43	3	35.452		0.03	6	0.245306	0.22614	0.264796	0.314908	0.1	-0.00974506	-0.0289111	0.9
3A	44	3	36.452		0.07	7	2.01738	1.89439	2.07086	2.17919	0.3	-0.0267386	-0.149735	0.866		44	3	36.452		0.77	7	6.04673	4.85667	4.54135	13.7143	2.3	0.752686	-0.437373	0.866		44	3	36.452		0.01	6	0.248396	0.232179	0.252217	0.315094	0	-0.00191005	-0.0181278	0.866
3A	45	3	37.452		0.16	8	2.05031	1.85173	2.11445	2.1712	0.6	-0.0320698	-0.230651	0.842		45	3	37.452		0.93	8	6.1652	4.80704	4.50976	13.632	2.9	0.827718	-0.530441	0.842		45	3	37.452		0	4	0.251079	0.23976	0.237173	0.315151	0	0.00695317	-0.00436616	0.842
3A	46	3	38.452		0.27	9	2.08222	1.8117	2.15393	2.16078	1.1	-0.0358541	-0.306376	0.829		46	3	38.452		1.09	8	6.26697	4.76258	4.48183	13.5515	3.5	0.892574	-0.611818	0.829		46	3	38.452		0.02	7	0.253389	0.248466	0.220298	0.314996	0.1	0.0165458	0.0116227	0.829
3A	47	3	39.452		0.4	8	2.11056	1.77895	2.18391	2.15028	1.6	-0.0366761	-0.368286	0.827		47	3	39.452		1.25	8	6.34604	4.72719	4.4566	13.481	4	0.944718	-0.674125	0.827		47	3	39.452		0.05	7	0.255451	0.257352	0.203083	0.314601	0.2	0.0261844	0.0280847	0.827
3A	48	3	40.452		0.54	8	2.13397	1.75435	2.20416	2.1413	2	-0.0350928	-0.414717	0.834		48	3	40.452		1.4	8	6.39982	4.70261	4.4337	13.4265	4.4	0.983062	-0.714147	0.834		48	3	40.452		0.11	7	0.257422	0.265398	0.187174	0.314029	0.4	0.035124	0.0430997	0.834
3A	49	3	41.452		0.67	7	2.15202	1.73718	2.21614	2.13457	2.3	-0.0320572	-0.4469	0.852		49	3	41.452		1.53	8	6.4286	4.68869	4.41341	13.3911	4.6	1.00759	-0.732312	0.852		49	3	41.452		0.18	7	0.259413	0.272033	0.173518	0.313387	0.6	0.0429475	0.0555681	0.852
3A	50	3	42.452		0.79	7	2.16495	1.72629	2.22151	2.13024	2.5	-0.0282757	-0.466938	0.881		50	3	42.452		1.64	7	6.43439	4.68423	4.39651	13.3752	4.8	1.01894	-0.73122	0.881		50	3	42.452		0.25	6	0.261463	0.277187	0.162239	0.312761	0.8	0.0496122	0.0653364	0.881
3A	51	3	43.452		0.89	6	2.17328	1.72063	2.22152	2.12816	2.6	-0.0241232	-0.476772	0.92		51	3	43.452		1.73	6	6.42024	4.68749	4.38385	13.3771	4.7	1.0182	-0.714552	0.92		51	3	43.452		0.34	5	0.263562	0.281044	0.153039	0.312193	0.9	0.0552614	0.072744	0.92
3A	52	3	44.452		0.98	5	2.17768	1.71923	2.21724	2.12803	2.6	-0.0197817	-0.478234	0.97		52	3	44.452		1.8	5	6.38965	4.69678	4.37607	13.3943	4.6	1.00679	-0.686085	0.97		52	3	44.452		0.43	5	0.265674	0.283838	0.145534	0.3117	1.1	0.0600703	0.0782343	0.97
3A	53	3	44.863	SNP_3574194	1.01	4	2.17851	1.71968	2.21444	2.12846	2.6	-0.0179639	-0.476795	0.993		53	3	44.863	SNP_3574194	1.83	4	6.37317	4.70195	4.37437	13.4049	4.5	0.999402	-0.671826	0.993		53	3	44.863	SNP_3574194	0.46	4	0.266537	0.284729	0.142858	0.311519	1.2	0.0618397	0.080031	0.993
3A	54	3	45.863		1.05	5	2.18273	1.71182	2.24634	2.12151	2.9	-0.0318057	-0.50272	0.939		54	3	45.863		1.7	5	6.39762	4.62552	4.51816	13.4165	4.5	0.939734	-0.832371	0.939		54	3	45.863		0.29	5	0.257884	0.278559	0.159258	0.312665	0.8	0.049313	0.0699884	0.939
3A	55	3	46.863		1.04	6	2.17759	1.7149	2.26729	2.11959	3	-0.0448506	-0.507537	0.92		55	3	46.863		1.56	6	6.38614	4.54898	4.71109	13.4429	4.3	0.837525	-0.999639	0.92		55	3	46.863		0.14	6	0.249691	0.26921	0.181983	0.313869	0.4	0.0338542	0.053373	0.92
3A	56	3	47.863		0.97	6	2.1571	1.73238	2.27413	2.12476	2.8	-0.0585157	-0.483236	0.936		56	3	47.863		1.42	6	6.32234	4.50989	4.89798	13.4952	3.9	0.712181	-1.10027	0.936		56	3	47.863		0.04	5	0.241955	0.257429	0.2105	0.314808	0.1	0.0157273	0.0312017	0.936
3A	57	3	48.863		0.86	5	2.11722	1.76472	2.26701	2.13631	2.2	-0.074895	-0.427387	0.987		57	3	48.863		1.24	5	6.18697	4.53209	5.04152	13.5984	3.2	0.572726	-1.08216	0.987		57	3	48.863		0	4	0.234043	0.246397	0.239527	0.315153	0	-0.00274201	0.00961175	0.987
3A	58	3	49.046	SNP_3575266	0.83	4	2.10829	1.77174	2.26444	2.13875	2.1	-0.0780759	-0.414629	1		58	3	49.046	SNP_3575266	1.2	4	6.15419	4.54202	5.06356	13.6222	3	0.545315	-1.06685	1		58	3	49.046	SNP_3575266	0	3	0.232558	0.244681	0.244444	0.315153	0	-0.00594315	0.00617956	1
3A	59	3	50.046		0.39	6	2.1526	1.8188	2.1087	2.16101	1.1	0.0219534	-0.311849	0.991		59	3	50.046		1.22	4	6.16193	4.54199	5.00373	13.6148	3.1	0.579098	-1.04084	0.991		59	3	50.046		0.01	4	0.227713	0.251779	0.235342	0.315071	0	-0.00381426	0.0202518	0.991
3A	60	3	50.199	SNP_3574846	0.31	4	2.14952	1.84472	2.06128	2.16773	0.8	0.0441236	-0.260681	1		60	3	50.199	SNP_3574846	1.21	4	6.1575	4.5489	4.99064	13.6206	3	0.583431	-1.02517	1		60	3	50.199	SNP_3574846	0.02	4	0.227273	0.252747	0.234043	0.315053	0	-0.00338491	0.0220896	1
3A	61	3	50.591	SNP_3574575	0.87	4	2.11186	1.75058	2.24449	2.13652	2.2	-0.0663147	-0.427594	1		61	3	50.591	SNP_3574575	0.97	4	6.05622	4.64034	4.86857	13.7033	2.4	0.593825	-0.822056	1		61	3	50.591	SNP_3574575	0.05	4	0.222222	0.261364	0.22449	0.314819	0.1	-0.00113379	0.0380076	1
3A	62	3	51.147	SNP_3574821	0.67	4	2.09581	1.77494	2.207	2.14762	1.7	-0.055593	-0.376466	1		62	3	51.147	SNP_3574821	0.92	4	6.03844	4.68563	4.8012	13.7216	2.3	0.618622	-0.73419	1		62	3	51.147	SNP_3574821	0.06	4	0.222222	0.264368	0.22	0.314711	0.1	0.00111111	0.0432567	1
3A	63	3	51.436	SNP_1211216	1.35	4	2.21804	1.6914	2.25761	2.11061	3.4	-0.0197826	-0.546431	1		63	3	51.436	SNP_1211216	1.23	4	6.12146	4.55068	4.89457	13.6142	3.1	0.613447	-0.95733	1		63	3	51.436	SNP_1211216	0.1	4	0.270833	0.25	0.195652	0.314386	0.3	0.0375906	0.0167572	1
3A	64	3	52.436		1.32	5	2.19445	1.68351	2.29038	2.1061	3.6	-0.047964	-0.558907	0.945		64	3	52.436		1.02	5	6.06757	4.58717	4.89574	13.664	2.7	0.585916	-0.894481	0.945		64	3	52.436		0.1	5	0.254556	0.26128	0.191877	0.314316	0.3	0.0313392	0.0380631	0.945
3A	65	3	53.436		1.25	6	2.15208	1.69298	2.3103	2.1095	3.5	-0.0791119	-0.538208	0.93		65	3	53.436		0.8	5	5.9664	4.65102	4.8835	13.7421	2.1	0.541449	-0.773932	0.93		65	3	53.436		0.14	7	0.232461	0.2753	0.188821	0.31389	0.4	0.0218201	0.0646591	0.93
3A	66	3	54.436		1.14	5	2.08943	1.71876	2.32022	2.11879	3	-0.115394	-0.486066	0.956		66	3	54.436		0.57	5	5.82582	4.73718	4.86456	13.8321	1.5	0.480626	-0.608009	0.956		66	3	54.436		0.21	6	0.216871	0.2849	0.18736	0.313352	0.6	0.0147551	0.0827845	0.956
3A	67	3	55.158	SNP_3574894	1.06	4	2.03667	1.74353	2.32271	2.12622	2.7	-0.143021	-0.436158	1		67	3	55.158	SNP_3574894	0.43	4	5.71128	4.80552	4.85271	13.8918	1.1	0.429284	-0.476475	1		67	3	55.158	SNP_3574894	0.25	4	0.212766	0.287356	0.1875	0.313192	0.6	0.012633	0.0872233	1
3A	68	3	56.158		0.86	5	2.06904	1.76508	2.30169	2.1342	2.3	-0.116326	-0.420284	0.97		68	3	56.158		0.75	4	5.95025	4.70878	4.84721	13.7727	1.9	0.551521	-0.689946	0.97		68	3	56.158		0.02	4	0.25054	0.248898	0.217994	0.314996	0.1	0.0162732	0.0146318	0.97
3A	69	3	56.568	SNP_3575187	0.72	4	2.07674	1.78967	2.26488	2.14482	1.9	-0.0940698	-0.38114	1		69	3	56.568	SNP_3575187	0.88	4	6.014	4.68777	4.84093	13.7357	2.2	0.586535	-0.739699	1		69	3	56.568	SNP_3575187	0.03	4	0.266667	0.234043	0.232558	0.314975	0.1	0.0170543	-0.0155698	1
3A	70	3	57.568		0.73	4	2.07856	1.78132	2.25509	2.14415	1.9	-0.0882637	-0.385506	0.973		70	3	57.568		1.04	4	6.0795	4.60803	4.90509	13.6737	2.6	0.587207	-0.884271	0.973		70	3	57.568		0.02	4	0.261869	0.23423	0.236531	0.315042	0	0.0126687	-0.0149694	0.973
3A	71	3	58.159	SNP_3574700	0.73	4	2.07932	1.77733	2.24483	2.14459	1.9	-0.082758	-0.384744	0.995		71	3	58.159	SNP_3574700	1.14	4	6.10524	4.57081	4.92831	13.6436	2.8	0.588467	-0.945968	0.995		71	3	58.159	SNP_3574700	0.01	4	0.258699	0.234709	0.238397	0.315079	0	0.0101514	-0.0138392	0.995
3A	72	3	59.159		0.29	6	2.03643	1.84035	2.17247	2.16523	0.9	-0.0680172	-0.2641	0.959		72	3	59.159		1.28	5	6.22116	4.52859	4.98225	13.5748	3.3	0.619456	-1.07312	0.959		72	3	59.159		0.04	4	0.273425	0.228792	0.237423	0.314848	0.1	0.0180006	-0.0266319	0.959
3A	73	3	60.159		0.02	4	1.9518	1.95384	2.03172	2.18418	0.1	-0.0399558	-0.0379239	0.982		73	3	60.159		1.33	4	6.26389	4.53625	5.00642	13.5703	3.4	0.628738	-1.0989	0.982		73	3	60.159		0.08	4	0.288673	0.224021	0.235583	0.314505	0.2	0.0265449	-0.0381075	0.982
3A	74	3	60.419	SNP_2289130	0.01	3	1.93349	1.97832	1.99952	2.18482	0	-0.0330134	0.0118201	0.998		74	3	60.419	SNP_2289130	1.33	4	6.26351	4.54651	5.00722	13.5802	3.3	0.628144	-1.08886	0.998		74	3	60.419	SNP_2289130	0.1	4	0.292625	0.223007	0.23492	0.314402	0.2	0.0288526	-0.0407648	0.998
3A	75	3	60.807	SNP_1124389	0.27	4	1.94929	1.88022	2.17298	2.17038	0.7	-0.111847	-0.180907	1		75	3	60.807	SNP_1124389	0.86	4	6.00535	4.64185	4.98213	13.7426	2.1	0.511611	-0.85189	1		75	3	60.807	SNP_1124389	0.07	4	0.27907	0.23913	0.212766	0.31463	0.2	0.0331519	-0.00678743	1
3A	76	3	61.807		0.4	4	1.9451	1.84971	2.2006	2.16285	1	-0.127749	-0.223144	0.997		76	3	61.807		0.99	4	6.12652	4.72762	4.73204	13.6969	2.5	0.697243	-0.701658	0.997		76	3	61.807		0.07	4	0.285471	0.227757	0.230115	0.314604	0.2	0.0276782	-0.0300359	0.997
3A	77	3	61.85	SNP_1046121	0.4	4	1.94492	1.8494	2.2	2.16284	1	-0.127541	-0.223063	1		77	3	61.85	SNP_1046121	0.99	4	6.12985	4.7322	4.72231	13.695	2.5	0.70377	-0.693876	1		77	3	61.85	SNP_1046121	0.07	4	0.285739	0.227263	0.230769	0.314597	0.2	0.0274851	-0.0309911	1
3A	78	3	62.85		0.41	5	1.92273	1.85516	2.21602	2.16127	1.1	-0.146646	-0.21422	0.952		78	3	62.85		0.77	5	6.02542	4.75428	4.75762	13.7551	2.1	0.633897	-0.637241	0.952		78	3	62.85		0.08	5	0.288244	0.230693	0.221999	0.314504	0.2	0.0331224	-0.0244282	0.952
3A	79	3	63.85		0.41	5	1.89899	1.86389	2.22861	2.16012	1.2	-0.164808	-0.199904	0.916		79	3	63.85		0.57	6	5.9002	4.78528	4.79472	13.8203	1.6	0.552738	-0.562179	0.916		79	3	63.85		0.09	6	0.289791	0.23487	0.212188	0.314367	0.3	0.0388017	-0.0161197	0.916
3A	80	3	64.85		0.41	6	1.8742	1.87575	2.23694	2.15943	1.2	-0.181368	-0.179825	0.894		80	3	64.85		0.38	6	5.75454	4.82625	4.83369	13.8869	1.1	0.460428	-0.467869	0.894		80	3	64.85		0.11	6	0.29037	0.23953	0.201828	0.314176	0.3	0.0442707	-0.00656944	0.894
3A	81	3	65.85		0.42	6	1.84895	1.89071	2.24045	2.15917	1.2	-0.195747	-0.153986	0.884		81	3	65.85		0.23	6	5.59203	4.87683	4.87455	13.9486	0.7	0.35874	-0.35646	0.884		81	3	65.85		0.14	6	0.290126	0.244268	0.191599	0.313937	0.4	0.0492633	0.00340583	0.884
3A	82	3	66.85		0.42	6	1.82384	1.90856	2.23894	2.15921	1.2	-0.207545	-0.12283	0.887		82	3	66.85		0.11	6	5.42069	4.9343	4.91746	13.9981	0.3	0.251614	-0.234772	0.887		82	3	66.85		0.17	6	0.289321	0.24867	0.182148	0.313671	0.5	0.0535865	0.0129363	0.887
3A	83	3	67.85		0.43	5	1.79949	1.92879	2.23271	2.15931	1.2	-0.216611	-0.087308	0.904		83	3	67.85		0.03	5	5.25187	4.99361	4.96263	14.0297	0.1	0.144619	-0.113636	0.904		83	3	67.85		0.2	5	0.288243	0.252438	0.173892	0.313405	0.6	0.0571758	0.0213702	0.904
3A	84	3	68.85		0.44	5	1.77644	1.95062	2.22261	2.15922	1.2	-0.223087	-0.0489025	0.933		84	3	68.85		0	4	5.09665	5.04912	5.01017	14.0426	0	0.04324	-0.00428132	0.933		84	3	68.85		0.24	5	0.287135	0.255428	0.166978	0.313161	0.6	0.0600785	0.0283708	0.933
3A	85	3	69.85		0.47	4	1.75515	1.97309	2.20986	2.15871	1.2	-0.227356	-0.00942019	0.975		85	3	69.85		0.01	4	4.96218	5.09677	5.0598	14.0405	0	-0.0488126	0.0857734	0.975		85	3	69.85		0.27	4	0.286137	0.25763	0.161367	0.312955	0.7	0.0623851	0.0338782	0.975
3A	86	3	70.332	SNP_3575098	0.48	4	1.74562	1.98384	2.20318	2.15828	1.2	-0.228778	0.0094338	1		86	3	70.332	SNP_3575098	0.02	4	4.90571	5.11629	5.08432	14.0356	0.1	-0.0893019	0.121276	1		86	3	70.332	SNP_3575098	0.29	4	0.285714	0.258427	0.159091	0.312871	0.7	0.0633117	0.0360244	1
3A	87	3	71.332		0.54	5	1.69526	2.02515	2.17908	2.15317	1.5	-0.241907	0.087986	0.962		87	3	71.332		0.03	4	5.00425	4.98552	5.24672	14.0319	0.1	-0.121233	-0.139961	0.962		87	3	71.332		0.25	4	0.280143	0.258302	0.163318	0.313201	0.6	0.0584122	0.0365712	0.962
3A	88	3	72.332		0.61	5	1.66838	2.05304	2.15116	2.15011	1.6	-0.241394	0.143273	0.976		88	3	72.332		0.14	4	5.11069	4.85802	5.41452	13.9936	0.4	-0.151914	-0.404588	0.976		88	3	72.332		0.21	4	0.273846	0.258178	0.168229	0.313534	0.5	0.0528085	0.037141	0.976
3A	89	3	72.792	SNP_3575224	0.63	4	1.6634	2.06133	2.13756	2.14988	1.6	-0.237078	0.160851	1		89	3	72.792	SNP_3575224	0.21	4	5.14875	4.81065	5.48561	13.969	0.5	-0.16843	-0.506535	1		89	3	72.792	SNP_3575224	0.19	4	0.270833	0.258065	0.170732	0.313684	0.5	0.0500508	0.037282	1
3A	90	3	73.792		0.7	5	1.64375	2.05935	2.16202	2.14484	1.9	-0.259134	0.156468	0.952		90	3	73.792		0.19	5	5.17544	4.80134	5.47316	13.9673	0.5	-0.148862	-0.522958	0.952		90	3	73.792		0.16	5	0.269264	0.257754	0.173893	0.313806	0.4	0.0476857	0.0361755	0.952
3A	91	3	74.792		0.76	5	1.62773	2.05413	2.18929	2.13997	2.1	-0.280781	0.145616	0.912		91	3	74.792		0.18	6	5.20114	4.79629	5.45303	13.9677	0.5	-0.125947	-0.530793	0.912		91	3	74.792		0.14	5	0.267941	0.256777	0.178177	0.313963	0.4	0.0448821	0.0337187	0.912
3A	92	3	75.792		0.83	5	1.61506	2.04587	2.21918	2.13515	2.3	-0.302059	0.12875	0.88		92	3	75.792		0.15	6	5.22466	4.79694	5.42354	13.9709	0.5	-0.0994423	-0.527157	0.88		92	3	75.792		0.11	6	0.267037	0.254935	0.183823	0.314155	0.3	0.0416073	0.0295047	0.88
3A	93	3	76.792		0.9	6	1.60534	2.03498	2.25117	2.13022	2.5	-0.322917	0.106725	0.855		93	3	76.792		0.13	7	5.24488	4.80457	5.38329	13.9773	0.5	-0.0692092	-0.509515	0.855		93	3	76.792		0.08	6	0.266706	0.252022	0.191117	0.314374	0.3	0.0377946	0.02311	0.855
3A	94	3	77.792		0.97	6	1.59819	2.02206	2.28442	2.12507	2.8	-0.343117	0.0807567	0.839		94	3	77.792		0.11	7	5.2607	4.82031	5.33109	13.9869	0.4	-0.0351946	-0.475579	0.839		94	3	77.792		0.06	6	0.266996	0.247896	0.200323	0.314599	0.2	0.0333365	0.0142365	0.839
3A	95	3	78.792		1.05	7	1.59327	2.00782	2.31777	2.11967	3	-0.362251	0.0523046	0.829		95	3	78.792		0.08	8	5.27161	4.84428	5.26724	13.9984	0.3	0.00218439	-0.42514	0.829		95	3	78.792		0.04	6	0.267832	0.242534	0.211577	0.314794	0.1	0.0281272	0.00282958	0.829
3A	96	3	79.792		1.13	7	1.59028	1.99309	2.34978	2.11415	3.3	-0.379753	0.023064	0.828		96	3	79.792		0.06	7	5.27742	4.87581	5.19329	14.0102	0.2	0.0420644	-0.359539	0.828		96	3	79.792		0.03	7	0.269034	0.236095	0.224712	0.314907	0.1	0.0221609	-0.010778	0.828
3A	97	3	80.792		1.22	7	1.58896	1.97866	2.37907	2.10876	3.5	-0.395051	-0.00535106	0.834		97	3	80.792		0.05	7	5.27897	4.9123	5.1138	14.0198	0.2	0.0825858	-0.284085	0.834		97	3	80.792		0.03	8	0.270342	0.228999	0.239075	0.314889	0.1	0.0156335	-0.0257095	0.834
3A	98	3	81.792		1.31	7	1.58909	1.9652	2.40441	2.10382	3.7	-0.407663	-0.0315486	0.848		98	3	81.792		0.04	6	5.27729	4.95069	5.03409	14.0256	0.1	0.121597	-0.205005	0.848		98	3	81.792		0.04	8	0.271513	0.221892	0.253504	0.314723	0.1	0.00900471	-0.0406168	0.848
3A	99	3	82.792		1.39	6	1.59044	1.9532	2.42499	2.09964	3.9	-0.417276	-0.0545174	0.87		99	3	82.792		0.04	5	5.2737	4.98769	4.95977	14.0273	0.1	0.156967	-0.129043	0.87		99	3	82.792		0.06	7	0.272411	0.215417	0.266752	0.314441	0.2	0.00282991	-0.0541642	0.87
3A	100	3	83.792		1.48	6	1.59283	1.94289	2.44044	2.09647	4.1	-0.423807	-0.0737489	0.899		100	3	83.792		0.05	5	5.26924	5.02111	4.89449	14.0256	0.1	0.187374	-0.0607499	0.899		100	3	83.792		0.1	7	0.272979	0.210014	0.277961	0.314107	0.3	-0.00249116	-0.065456	0.899
3A	101	3	84.792		1.56	5	1.59609	1.93435	2.45075	2.09443	4.2	-0.427332	-0.0890768	0.936		101	3	84.792		0.06	4	5.26446	5.04995	4.83976	14.0218	0.2	0.212349	-0.00215806	0.936		101	3	84.792		0.15	6	0.273161	0.205871	0.286811	0.313787	0.4	-0.00682486	-0.0741148	0.936
3A	102	3	85.792		1.63	5	1.6001	1.92749	2.45627	2.09355	4.2	-0.428082	-0.100692	0.981		102	3	85.792		0.07	4	5.25973	5.07401	4.79564	14.017	0.2	0.232044	0.0463245	0.981		102	3	85.792		0.2	5	0.272929	0.202952	0.293434	0.313522	0.5	-0.0102526	-0.080229	0.981
3A	103	3	86.176	SNP_982904	1.66	4	1.60182	1.92527	2.45721	2.09351	4.2	-0.427696	-0.104239	1		103	3	86.176	SNP_982904	0.08	4	5.25795	5.08202	4.78136	14.0152	0.2	0.238295	0.0623622	1		103	3	86.176	SNP_982904	0.22	4	0.272727	0.202128	0.295455	0.313439	0.6	-0.0113636	-0.0819632	1
3A	104	3	87.176		2	4	1.5745	1.9098	2.49671	2.07426	5.1	-0.461106	-0.125802	0.98		104	3	87.176		0.15	4	5.09613	5.225	4.66497	13.9903	0.4	0.215581	0.344449	0.98		104	3	87.176		0.15	4	0.269846	0.207233	0.283067	0.313957	0.4	-0.00661069	-0.0692236	0.98
3A	105	3	87.681	SNP_3574556	2.14	4	1.56244	1.90586	2.50478	2.06748	5.4	-0.471169	-0.127751	1		105	3	87.681	SNP_3574556	0.22	4	5.01889	5.29233	4.62298	13.9672	0.5	0.197955	0.4714	1		105	3	87.681	SNP_3574556	0.12	4	0.266667	0.211111	0.276596	0.314248	0.3	-0.00496454	-0.0605201	1
3A	106	3	88.681		2.12	5	1.55853	1.90681	2.51691	2.06315	5.6	-0.479192	-0.130908	0.951		106	3	88.681		0.22	5	4.94716	5.32647	4.63228	13.9585	0.6	0.157443	0.536755	0.951		106	3	88.681		0.11	5	0.266454	0.210322	0.277563	0.314211	0.3	-0.00555426	-0.0616863	0.951
3A	107	3	89.681		2.08	6	1.55547	1.90941	2.52453	2.06021	5.7	-0.48453	-0.130584	0.912		107	3	89.681		0.24	5	4.87656	5.36011	4.64597	13.9472	0.7	0.115293	0.598848	0.912		107	3	89.681		0.11	5	0.26547	0.210188	0.277971	0.314213	0.3	-0.00625009	-0.061533	0.912
3A	108	3	90.681		2.02	7	1.55325	1.91434	2.5262	2.05908	5.8	-0.486477	-0.125383	0.883		108	3	90.681		0.26	6	4.80931	5.3916	4.66499	13.9342	0.8	0.0721636	0.654451	0.883		108	3	90.681		0.1	6	0.26368	0.210823	0.277702	0.314261	0.3	-0.00701083	-0.0598675	0.883
3A	109	3	91.681		1.94	7	1.55186	1.92253	2.52021	2.06027	5.7	-0.484177	-0.113503	0.864		109	3	91.681		0.28	6	4.74719	5.41928	4.69024	13.921	0.9	0.0284726	0.70056	0.864		109	3	91.681		0.08	6	0.261119	0.212305	0.276661	0.314353	0.3	-0.00777111	-0.0565852	0.864
3A	110	3	92.681		1.84	8	1.55129	1.93521	2.50448	2.06423	5.5	-0.476596	-0.0926724	0.855		110	3	92.681		0.31	6	4.69134	5.44173	4.72246	13.9088	1	-0.0155598	0.734836	0.855		110	3	92.681		0.07	6	0.257903	0.21464	0.27481	0.314481	0.2	-0.00845341	-0.0517169	0.855
3A	111	3	93.681		1.73	9	1.55154	1.95414	2.47626	2.07135	5.2	-0.462362	-0.05976	0.856		111	3	93.681		0.33	6	4.64238	5.4579	4.76199	13.8987	1	-0.0598058	0.755717	0.856		111	3	93.681		0.05	6	0.254205	0.217765	0.272184	0.31463	0.2	-0.00898932	-0.045429	0.856
3A	112	3	94.681		1.6	9	1.55269	1.9814	2.43254	2.08154	4.8	-0.439926	-0.0112169	0.867		112	3	94.681		0.36	6	4.60052	5.46718	4.80869	13.8914	1.1	-0.104086	0.762578	0.867		112	3	94.681		0.04	6	0.250231	0.221547	0.268905	0.314781	0.1	-0.00933682	-0.0380215	0.867
3A	113	3	95.681		1.48	8	1.55505	2.01739	2.37317	2.09331	4.2	-0.409063	0.0532834	0.888		113	3	95.681		0.38	6	4.56562	5.46951	4.86171	13.8868	1.1	-0.148044	0.75585	0.888		113	3	95.681		0.03	5	0.246198	0.225788	0.265174	0.314916	0.1	-0.00948823	-0.0298974	0.888
3A	114	3	96.681		1.38	7	1.55929	2.05645	2.30781	2.10342	3.7	-0.374258	0.122898	0.919		114	3	96.681		0.41	5	4.53733	5.46543	4.91951	13.8846	1.1	-0.191089	0.737012	0.919		114	3	96.681		0.02	5	0.242309	0.230253	0.261241	0.315022	0	-0.00946555	-0.0215216	0.919
3A	115	3	97.681		1.32	5	1.56621	2.08993	2.25062	2.11016	3.4	-0.342205	0.181512	0.961		115	3	97.681		0.43	5	4.51511	5.456	4.97992	13.8839	1.1	-0.232404	0.708489	0.961		115	3	97.681		0.01	4	0.23873	0.234719	0.257338	0.315092	0	-0.0093039	-0.0133151	0.961
3A	116	3	98.435	SNP_2251281	1.29	4	1.57346	2.10933	2.21612	2.11371	3.3	-0.321329	0.214539	0.998		116	3	98.435	SNP_2251281	0.45	4	4.50202	5.44616	5.0258	13.8838	1.1	-0.261887	0.682246	0.998		116	3	98.435	SNP_2251281	0.01	3	0.236311	0.237968	0.254533	0.315122	0	-0.00911082	-0.0074533	0.998
3A	117	3	99.435		1.25	4	1.56535	2.1236	2.18587	2.11543	3.2	-0.310262	0.247989	0.964		117	3	99.435		0.36	5	4.52537	5.37263	5.06233	13.9135	0.9	-0.268477	0.578784	0.964		117	3	99.435		0.04	4	0.221079	0.240634	0.270066	0.314867	0.1	-0.0244931	-0.00493871	0.964
3A	118	3	100.128	SNP_1088008	1.23	4	1.56098	2.13322	2.15514	2.11686	3.1	-0.297077	0.275164	1		118	3	100.128	SNP_1088008	0.29	4	4.55865	5.30407	5.12103	13.9413	0.7	-0.281186	0.464226	1		118	3	100.128	SNP_1088008	0.08	4	0.211538	0.241758	0.282051	0.314571	0.2	-0.0352564	-0.00503663	1
3A	119	3	101.128		1.34	4	1.56771	2.08119	2.27015	2.11051	3.4	-0.35122	0.162259	0.983		119	3	101.128		0.36	4	4.51589	5.2046	5.41295	13.9167	0.9	-0.448532	0.240184	0.983		119	3	101.128		0	4	0.23512	0.24123	0.250893	0.315146	0	-0.00788649	-0.0017764	0.983
3A	120	3	101.365	SNP_3575299	1.38	4	1.56981	2.07084	2.28674	2.10878	3.5	-0.358466	0.142562	1		120	3	101.365	SNP_3575299	0.39	4	4.50843	5.18306	5.462	13.9065	1	-0.476786	0.197841	1		120	3	101.365	SNP_3575299	0	3	0.24073	0.240971	0.244444	0.315177	0	-0.00185719	-0.00161647	1
3A	121	3	102.365		1.39	5	1.54292	2.09754	2.27182	2.10202	3.8	-0.364449	0.190172	0.956		121	3	102.365		0.35	5	4.49786	5.25416	5.34533	13.9128	0.9	-0.423734	0.332565	0.956		121	3	102.365		0	4	0.249416	0.238093	0.239351	0.315154	0	0.00503291	-0.00629076	0.956
3A	122	3	103.365		1.37	6	1.52878	2.11988	2.2477	2.09909	3.9	-0.359459	0.23164	0.938		122	3	103.365		0.34	5	4.49989	5.32863	5.19887	13.9124	0.9	-0.349494	0.479249	0.938		122	3	103.365		0.01	5	0.258528	0.235112	0.233841	0.31506	0	0.0123436	-0.0110729	0.938
3A	123	3	104.365		1.29	7	1.53172	2.13312	2.21794	2.10175	3.8	-0.34311	0.258287	0.944		123	3	104.365		0.35	5	4.51984	5.38895	5.04833	13.9061	1	-0.264244	0.604868	0.944		123	3	104.365		0.03	5	0.267161	0.232519	0.228058	0.314904	0.1	0.0195515	-0.0150906	0.944
3A	124	3	105.365		1.12	6	1.56999	2.12481	2.18681	2.11592	3.2	-0.30841	0.246405	0.975		124	3	105.365		0.38	5	4.55984	5.42156	4.9206	13.9028	1	-0.18038	0.681342	0.975		124	3	105.365		0.06	4	0.274619	0.230595	0.222265	0.314713	0.1	0.0261771	-0.0178479	0.975
3A	125	3	105.859	SNP_3574524	0.99	4	1.61434	2.10593	2.17103	2.12994	2.5	-0.278343	0.213248	1		125	3	105.859	SNP_3574524	0.39	4	4.58611	5.42724	4.86878	13.9043	1	-0.141335	0.699796	1		125	3	105.859	SNP_3574524	0.07	4	0.277778	0.229885	0.219512	0.314616	0.2	0.0291328	-0.0187599	1
3A	126	3	106.859		1.07	5	1.59482	2.10701	2.18923	2.12411	2.8	-0.297209	0.214981	0.96		126	3	106.859		0.42	5	4.56471	5.45023	4.84223	13.8878	1.1	-0.13876	0.746765	0.96		126	3	106.859		0.06	5	0.272968	0.236714	0.21192	0.314679	0.2	0.030524	-0.00572971	0.96
3A	127	3	107.859		1.14	5	1.58029	2.10521	2.20576	2.1197	3	-0.312733	0.212187	0.946		127	3	107.859		0.42	5	4.55766	5.45878	4.82679	13.8813	1.2	-0.134567	0.766552	0.946		127	3	107.859		0.06	5	0.265913	0.244884	0.204339	0.314685	0.2	0.0307871	0.00975743	0.946
3A	128	3	108.859		1.2	5	1.57078	2.10144	2.21895	2.11692	3.1	-0.324087	0.20657	0.957		128	3	108.859		0.41	5	4.567	5.45051	4.82525	13.8874	1.1	-0.129124	0.754382	0.957		128	3	108.859		0.07	4	0.257841	0.253348	0.197231	0.314585	0.2	0.030305	0.0258119	0.957
3A	129	3	109.859		1.25	4	1.56607	2.09646	2.22771	2.11586	3.2	-0.330816	0.199566	0.995		129	3	109.859		0.39	4	4.5918	5.42659	4.83701	13.9046	1	-0.122605	0.712179	0.995		129	3	109.859		0.1	4	0.250558	0.260788	0.190978	0.314387	0.3	0.02979	0.0400199	0.995
3A	130	3	109.947	SNP_3574118	1.25	4	1.56588	2.09598	2.22825	2.11585	3.2	-0.331184	0.198911	1		130	3	109.947	SNP_3574118	0.39	4	4.59462	5.42386	4.83857	13.9065	1	-0.121978	0.70727	1		130	3	109.947	SNP_3574118	0.1	4	0.25	0.261364	0.190476	0.314367	0.3	0.0297619	0.0411255	1
3A	131	3	110.947		1.09	5	1.59183	2.07554	2.24257	2.12163	2.9	-0.325367	0.158336	0.957		131	3	110.947		0.4	6	4.56728	5.46521	4.81072	13.8807	1.2	-0.12172	0.776212	0.957		131	3	110.947		0.09	4	0.257948	0.256423	0.192329	0.314426	0.2	0.0328095	0.0312851	0.957
3A	132	3	111.947		0.91	5	1.6344	2.04461	2.25477	2.13091	2.5	-0.310185	0.100026	0.947		132	3	111.947		0.38	6	4.56576	5.4621	4.84276	13.8852	1.1	-0.138503	0.75784	0.947		132	3	111.947		0.09	4	0.26606	0.250643	0.194936	0.314443	0.2	0.0355621	0.0201444	0.947
3A	133	3	112.947		0.75	5	1.69537	2.00242	2.26317	2.14213	2	-0.283898	0.0231464	0.969		133	3	112.947		0.33	5	4.59033	5.41262	4.92917	13.9171	0.9	-0.169423	0.652866	0.969		133	3	112.947		0.1	4	0.273677	0.244545	0.198044	0.314408	0.2	0.0378164	0.00868403	0.969
3A	134	3	113.562	SNP_1062728	0.67	4	1.73681	1.97396	2.26566	2.14807	1.7	-0.264425	-0.0272759	1		134	3	113.562	SNP_1062728	0.29	4	4.61455	5.37001	4.98981	13.9398	0.7	-0.187633	0.567828	1		134	3	113.562	SNP_1062728	0.1	4	0.277855	0.240881	0.200062	0.314363	0.3	0.0388963	0.00192275	1
3A	135	3	114.562		0.75	5	1.67738	2.01913	2.24551	2.14025	2.1	-0.284061	0.0576873	0.954		135	3	114.562		0.27	5	4.61508	5.37166	4.99104	13.94	0.7	-0.187981	0.568597	0.954		135	3	114.562		0.12	5	0.287741	0.233576	0.202336	0.314131	0.3	0.0427025	-0.0114631	0.954
3A	136	3	115.562		0.82	5	1.6467	2.04695	2.22681	2.13512	2.3	-0.290057	0.110196	0.937		136	3	115.562		0.25	5	4.62606	5.37459	4.98203	13.9422	0.7	-0.177983	0.570538	0.937		136	3	115.562		0.15	6	0.297347	0.225249	0.20624	0.313816	0.4	0.0455532	-0.0265443	0.937
3A	137	3	116.562		0.87	5	1.63631	2.06567	2.20502	2.13382	2.4	-0.284352	0.14501	0.947		137	3	116.562		0.25	5	4.64434	5.38137	4.96406	13.9446	0.7	-0.15986	0.57717	0.947		137	3	116.562		0.19	5	0.304672	0.216986	0.211767	0.313493	0.5	0.0464523	-0.0412329	0.947
3A	138	3	117.562		0.89	4	1.63842	2.07854	2.18321	2.135	2.3	-0.272393	0.167731	0.984		138	3	117.562		0.25	5	4.6677	5.39125	4.94221	13.9468	0.7	-0.137254	0.5863	0.984		138	3	117.562		0.24	4	0.309247	0.209225	0.218304	0.313209	0.6	0.0454716	-0.0545507	0.984
3A	139	3	117.821	SNP_3574356	0.89	4	1.64053	2.08077	2.1783	2.13558	2.3	-0.268884	0.171353	0.999		139	3	117.821	SNP_3574356	0.26	5	4.67452	5.3938	4.9368	13.9475	0.7	-0.13114	0.588135	0.999		139	3	117.821	SNP_3574356	0.26	4	0.310021	0.207352	0.219993	0.313143	0.6	0.0450139	-0.0576543	0.999
3A	140	3	118.821		0.87	5	1.63328	2.07978	2.17989	2.13457	2.3	-0.273305	0.17319	0.952		140	3	118.821		0.25	5	4.66231	5.40266	4.92179	13.9411	0.7	-0.129739	0.610613	0.952		140	3	118.821		0.23	5	0.309834	0.209254	0.219089	0.313211	0.6	0.0453723	-0.0552071	0.952
3A	141	3	119.821		0.85	5	1.62673	2.07866	2.18096	2.13376	2.4	-0.277115	0.17481	0.91		141	3	119.821		0.25	6	4.65039	5.41192	4.90555	13.9344	0.8	-0.127583	0.633951	0.91		141	3	119.821		0.21	6	0.309122	0.211586	0.217906	0.313304	0.6	0.0456079	-0.0519279	0.91
3A	142	3	120.821		0.84	6	1.62089	2.07749	2.18136	2.13317	2.4	-0.280234	0.176371	0.872		142	3	120.821		0.24	7	4.63886	5.42157	4.88806	13.9272	0.8	-0.124597	0.658109	0.872		142	3	120.821		0.18	7	0.307774	0.214406	0.216424	0.313424	0.6	0.0456752	-0.0476928	0.872
3A	143	3	121.821		0.82	7	1.61578	2.07639	2.18094	2.13281	2.4	-0.28258	0.17803	0.838		143	3	121.821		0.24	8	4.62785	5.43157	4.86928	13.9196	0.9	-0.120719	0.683005	0.838		143	3	121.821		0.16	8	0.30566	0.217779	0.214629	0.313569	0.5	0.0455153	-0.0423655	0.838
3A	144	3	122.821		0.8	7	1.6114	2.07543	2.17956	2.13269	2.4	-0.284076	0.179949	0.807		144	3	122.821		0.23	8	4.61758	5.44177	4.84934	13.9116	0.9	-0.115879	0.708313	0.807		144	3	122.821		0.14	8	0.302618	0.221782	0.212511	0.313736	0.5	0.0450534	-0.0357823	0.807
3A	145	3	123.821		0.77	7	1.60776	2.07474	2.17705	2.13281	2.4	-0.284647	0.182335	0.78		145	3	123.821		0.23	9	4.60799	5.45231	4.82815	13.9032	1	-0.110081	0.734239	0.78		145	3	123.821		0.11	9	0.298488	0.226471	0.210088	0.313918	0.4	0.0442	-0.0278168	0.78
3A	146	3	124.821		0.75	8	1.60479	2.07448	2.17321	2.13316	2.4	-0.284213	0.185481	0.757		146	3	124.821		0.23	10	4.59935	5.46295	4.80594	13.8945	1.1	-0.103292	0.760306	0.757		146	3	124.821		0.1	9	0.293056	0.231934	0.20736	0.314103	0.3	0.0428481	-0.0182741	0.757
3A	147	3	125.821		0.73	8	1.60253	2.07468	2.16799	2.13374	2.4	-0.282732	0.189415	0.738		147	3	125.821		0.23	10	4.59201	5.47338	4.78302	13.8857	1.1	-0.095505	0.785866	0.738		147	3	125.821		0.08	9	0.286153	0.238204	0.204376	0.314269	0.3	0.0408885	-0.00706113	0.738
3A	148	3	126.821		0.71	9	1.60091	2.07547	2.16121	2.13453	2.3	-0.280151	0.194411	0.722		148	3	126.821		0.23	11	4.58582	5.48376	4.75944	13.8766	1.2	-0.0868073	0.811125	0.722		148	3	126.821		0.07	7	0.277639	0.245276	0.201205	0.314388	0.3	0.038217	0.0058541	0.722
3A	149	3	127.821		0.68	9	1.59998	2.07683	2.15293	2.1355	2.3	-0.276475	0.200378	0.71		149	3	127.821		0.24	11	4.58138	5.49346	4.73581	13.8678	1.3	-0.0772172	0.834869	0.71		149	3	127.821		0.06	10	0.267606	0.252986	0.197967	0.314425	0.2	0.0348193	0.0201997	0.71
3A	150	3	128.821		0.66	9	1.59971	2.07878	2.14315	2.13663	2.2	-0.271718	0.207352	0.701		150	3	128.821		0.24	12	4.57848	5.50264	4.71225	13.8592	1.3	-0.066886	0.857275	0.701		150	3	128.821		0.06	12	0.256149	0.26119	0.194765	0.314345	0.3	0.0306921	0.0357322	0.701
3A	151	3	129.821		0.63	9	1.60012	2.08127	2.13199	2.13789	2.2	-0.265933	0.215209	0.696		151	3	129.821		0.25	12	4.57776	5.51062	4.68952	13.8513	1.4	-0.0558797	0.876981	0.696		151	3	129.821		0.07	13	0.243936	0.269355	0.191865	0.314134	0.3	0.0260352	0.0514548	0.696
3A	152	3	130.821		0.61	9	1.60124	2.08418	2.11966	2.13924	2.1	-0.259208	0.223732	0.695		152	3	130.821		0.26	12	4.57922	5.5173	4.66794	13.8444	1.4	-0.0443601	0.893718	0.695		152	3	130.821		0.08	14	0.231771	0.27693	0.189519	0.313813	0.4	0.0211261	0.0662848	0.695
3A	153	3	131.821		0.59	9	1.6031	2.08738	2.10641	2.14065	2	-0.251659	0.232622	0.697		153	3	131.821		0.26	12	4.58304	5.52241	4.64798	13.8387	1.5	-0.032473	0.906901	0.697		153	3	131.821		0.1	14	0.220488	0.283386	0.187971	0.313438	0.6	0.0162584	0.0791566	0.697
3A	154	3	132.821		0.57	9	1.60574	2.09069	2.09258	2.1421	2	-0.243421	0.24153	0.703		154	3	132.821		0.28	12	4.58934	5.52571	4.63007	13.8346	1.5	-0.0203638	0.916008	0.703		154	3	132.821		0.11	14	0.210587	0.288463	0.18735	0.313072	0.7	0.0116187	0.0894945	0.703
3A	155	3	133.821		0.55	9	1.60921	2.09394	2.07848	2.14358	1.9	-0.234638	0.250094	0.713		155	3	133.821		0.29	11	4.59844	5.52682	4.61471	13.8324	1.5	-0.00813526	0.920249	0.713		155	3	133.821		0.13	13	0.202293	0.292078	0.187712	0.31277	0.8	0.00729013	0.0970754	0.713
3A	156	3	134.821		0.53	9	1.61354	2.09696	2.06443	2.14509	1.8	-0.225447	0.257975	0.726		156	3	134.821		0.3	11	4.60985	5.52606	4.60183	13.8319	1.5	0.00400904	0.920219	0.726		156	3	134.821		0.15	12	0.195552	0.294335	0.189014	0.312557	0.8	0.00326859	0.102052	0.726
3A	157	3	135.821		0.52	9	1.61876	2.09962	2.0507	2.14663	1.8	-0.215972	0.264893	0.742		157	3	135.821		0.31	11	4.62377	5.52314	4.59178	13.8334	1.5	0.0159956	0.915367	0.742		157	3	135.821		0.17	12	0.190203	0.295405	0.191159	0.312442	0.9	-0.000478102	0.104724	0.742
3A	158	3	136.821		0.5	8	1.62487	2.1018	2.03752	2.14821	1.7	-0.206322	0.270601	0.762		158	3	136.821		0.33	10	4.64014	5.51805	4.58466	13.8369	1.5	0.0277391	0.905646	0.762		158	3	136.821		0.18	11	0.186103	0.29544	0.194052	0.31242	0.9	-0.00397446	0.105362	0.762
3A	159	3	137.821		0.49	8	1.63182	2.10348	2.02498	2.14981	1.6	-0.196576	0.275082	0.786		159	3	137.821		0.34	9	4.65849	5.51109	4.58028	13.8421	1.4	0.0391034	0.891698	0.786		159	3	137.821		0.19	10	0.183058	0.294639	0.197535	0.312476	0.9	-0.00723859	0.104342	0.786
3A	160	3	138.821		0.48	7	1.63961	2.10461	2.01323	2.15145	1.6	-0.186812	0.278185	0.814		160	3	138.821		0.36	8	4.67843	5.50251	4.57847	13.8487	1.4	0.0499788	0.874058	0.814		160	3	138.821		0.2	9	0.180911	0.293178	0.201448	0.312591	0.8	-0.0102687	0.101999	0.814
3A	161	3	139.821		0.48	7	1.64814	2.10521	2.0023	2.15311	1.5	-0.177084	0.279993	0.846		161	3	139.821		0.37	8	4.69939	5.4927	4.57893	13.8563	1.3	0.0602321	0.853541	0.846		161	3	139.821		0.21	8	0.179527	0.29122	0.205627	0.312747	0.8	-0.0130501	0.0986432	0.846
3A	162	3	140.821		0.47	6	1.65735	2.10529	1.99223	2.1548	1.4	-0.167444	0.280501	0.881		162	3	140.821		0.39	7	4.72115	5.48179	4.58153	13.8647	1.3	0.0698118	0.830451	0.881		162	3	140.821		0.21	7	0.178796	0.288907	0.209921	0.312926	0.7	-0.0155626	0.0945489	0.881
3A	163	3	141.821		0.47	5	1.66714	2.1049	1.98301	2.1565	1.3	-0.157933	0.279825	0.92		163	3	141.821		0.41	6	4.74312	5.47017	4.58592	13.8736	1.2	0.0786021	0.805652	0.92		163	3	141.821		0.22	6	0.178622	0.28636	0.214198	0.313117	0.7	-0.0177879	0.0899494	0.92
3A	164	3	142.821		0.46	5	1.67742	2.10409	1.9746	2.15818	1.2	-0.14859	0.278076	0.963		164	3	142.821		0.42	5	4.76491	5.45813	4.59184	13.8826	1.1	0.0865331	0.779756	0.963		164	3	142.821		0.22	5	0.178926	0.283676	0.218354	0.313308	0.6	-0.0197142	0.0850355	0.963
3A	165	3	143.572	SNP_3575193	0.46	4	1.6854	2.10323	1.96881	2.15944	1.2	-0.141704	0.276122	0.998		165	3	143.572	SNP_3575193	0.43	4	4.78094	5.44895	4.59715	13.8894	1.1	0.0918969	0.759904	0.998		165	3	143.572	SNP_3575193	0.22	4	0.179423	0.281617	0.221349	0.313447	0.5	-0.0209628	0.0812309	0.998
3A	166	3	144.572		0.47	5	1.66639	2.10903	1.96805	2.15646	1.3	-0.150831	0.291816	0.946		166	3	144.572		0.46	6	4.65116	5.49473	4.60715	13.8545	1.3	0.0220096	0.86557	0.946		166	3	144.572		0.32	6	0.175662	0.296212	0.198664	0.312244	0.9	-0.0115009	0.109049	0.946
3A	167	3	145.572		0.47	6	1.65613	2.11057	1.9686	2.15509	1.4	-0.156234	0.298205	0.913		167	3	145.572		0.48	7	4.53135	5.53218	4.62376	13.8185	1.6	-0.046201	0.954628	0.913		167	3	145.572		0.48	7	0.171712	0.311964	0.173741	0.310344	1.5	-0.00101467	0.139238	0.913
3A	168	3	146.572		0.45	6	1.65553	2.1075	1.97063	2.15559	1.4	-0.157553	0.294417	0.897		168	3	146.572		0.5	8	4.44981	5.54837	4.64932	13.7979	1.7	-0.0997518	0.998809	0.897		168	3	146.572		0.68	7	0.168646	0.325604	0.151849	0.308192	2.2	0.00839854	0.165356	0.897
3A	169	3	147.572		0.41	6	1.66496	2.09979	1.97418	2.15796	1.3	-0.154608	0.280224	0.9		169	3	147.572		0.5	8	4.41503	5.53941	4.68495	13.8015	1.7	-0.134961	0.989424	0.9		169	3	147.572		0.89	7	0.167729	0.335475	0.135422	0.306342	2.8	0.0161535	0.183899	0.9
3A	170	3	148.572		0.36	6	1.68438	2.08774	1.97905	2.16189	1.1	-0.147336	0.256025	0.92		170	3	148.572		0.47	7	4.42409	5.50762	4.72949	13.8279	1.5	-0.1527	0.930825	0.92		170	3	148.572		1.1	6	0.170203	0.341599	0.123628	0.305041	3.2	0.0232873	0.194683	0.92
3A	171	3	149.572		0.31	5	1.71246	2.07224	1.9848	2.16672	0.9	-0.136171	0.223612	0.959		171	3	149.572		0.43	6	4.47021	5.45832	4.77952	13.8694	1.2	-0.154657	0.833459	0.959		171	3	149.572		1.28	6	0.177444	0.344158	0.115039	0.304361	3.4	0.0312027	0.197917	0.959
3A	172	3	150.227	SNP_1272135	0.27	4	1.73392	2.06105	1.9887	2.16993	0.7	-0.127392	0.19974	0.994		172	3	150.227	SNP_1272135	0.4	4	4.5138	5.42077	4.81293	13.8991	1	-0.149565	0.757402	0.994		172	3	150.227	SNP_1272135	1.39	4	0.185185	0.34399	0.110601	0.304231	3.5	0.0372918	0.196097	0.994
3A	173	3	151.227		0.29	5	1.71884	2.06757	1.9891	2.16771	0.8	-0.135129	0.213598	0.948		173	3	151.227		0.46	5	4.44274	5.46522	4.78645	13.8603	1.3	-0.171851	0.85063	0.948		173	3	151.227		1.26	5	0.186268	0.341284	0.113225	0.304756	3.3	0.0365213	0.191538	0.948
3A	174	3	152.227		0.31	6	1.70559	2.07344	1.98948	2.16558	0.9	-0.141945	0.22591	0.91		174	3	152.227		0.51	6	4.37576	5.50848	4.75895	13.8182	1.6	-0.191595	0.941123	0.91		174	3	152.227		1.12	6	0.188699	0.337522	0.116416	0.305441	3.1	0.0361412	0.184965	0.91
3A	175	3	153.227		0.33	6	1.69472	2.07832	1.98998	2.16371	1	-0.14763	0.235967	0.881		175	3	153.227		0.57	7	4.31913	5.54671	4.73231	13.7775	1.9	-0.206591	1.02099	0.881		175	3	153.227		0.98	7	0.192743	0.33257	0.120285	0.306293	2.8	0.036229	0.176056	0.881
3A	176	3	154.227		0.34	6	1.68659	2.08195	1.99077	2.16219	1.1	-0.152088	0.243268	0.861		176	3	154.227		0.62	7	4.27689	5.57675	4.70867	13.743	2.1	-0.21589	1.08398	0.861		176	3	154.227		0.83	7	0.198694	0.326287	0.124966	0.307308	2.5	0.0368644	0.164457	0.861
3A	177	3	155.227		0.35	6	1.68131	2.08419	1.99196	2.16113	1.1	-0.155323	0.247561	0.849		177	3	155.227		0.66	8	4.24998	5.59703	4.68973	13.7182	2.3	-0.219875	1.12717	0.849		177	3	155.227		0.69	8	0.206793	0.318565	0.130611	0.308461	2.1	0.0380914	0.149864	0.849
3A	178	3	156.227		0.36	6	1.67882	2.08503	1.9936	2.16055	1.1	-0.157392	0.24882	0.846		178	3	156.227		0.69	8	4.23791	5.60689	4.67674	13.7048	2.4	-0.219411	1.14957	0.846		178	3	156.227		0.56	8	0.217073	0.309392	0.137369	0.309697	1.7	0.0398524	0.132171	0.846
3A	179	3	157.227		0.37	6	1.67893	2.08451	1.99569	2.16044	1.1	-0.158378	0.247199	0.852		179	3	157.227		0.71	7	4.23916	5.60674	4.6701	13.7031	2.4	-0.215468	1.15211	0.852		179	3	157.227		0.44	8	0.229047	0.29901	0.145317	0.310919	1.4	0.0418654	0.111828	0.852
3A	180	3	158.227		0.37	6	1.68142	2.08277	1.99815	2.16077	1.1	-0.158365	0.242986	0.867		180	3	158.227		0.72	7	4.25179	5.5977	4.66954	13.7117	2.4	-0.208873	1.13704	0.867		180	3	158.227		0.34	7	0.241592	0.287995	0.15437	0.312014	1	0.0436114	0.0900142	0.867
3A	181	3	159.227		0.37	6	1.68599	2.07999	2.00087	2.16148	1.1	-0.157435	0.236565	0.89		181	3	159.227		0.72	6	4.27394	5.5811	4.67442	13.7289	2.2	-0.20024	1.10693	0.89		181	3	159.227		0.25	6	0.253296	0.277134	0.164218	0.312897	0.7	0.044539	0.0683766	0.89
3A	182	3	160.227		0.37	5	1.69235	2.07639	2.00368	2.16248	1	-0.155665	0.228374	0.923		182	3	160.227		0.72	6	4.30344	5.55874	4.68368	13.752	2.1	-0.19012	1.06518	0.923		182	3	160.227		0.19	5	0.263135	0.267104	0.174392	0.313549	0.5	0.0443715	0.0483397	0.923
3A	183	3	161.227		0.37	5	1.70015	2.07217	2.00642	2.16371	1	-0.153137	0.218886	0.964		183	3	161.227		0.7	5	4.33826	5.53233	4.69621	13.7787	1.9	-0.178978	1.01509	0.964		183	3	161.227		0.14	4	0.270746	0.25829	0.184409	0.313996	0.4	0.0431687	0.0307126	0.964
3A	184	3	161.967	SNP_3574534	0.37	4	1.70667	2.06878	2.00833	2.16471	0.9	-0.15083	0.211288	1		184	3	161.967	SNP_3574534	0.69	4	4.36625	5.51119	4.70692	13.7994	1.7	-0.170336	0.974606	1		184	3	161.967	SNP_3574534	0.12	4	0.275	0.252626	0.191498	0.314222	0.3	0.0417512	0.0193774	1
3A	185	3	162.871	SNP_3574598	0.33	4	1.70973	2.05032	2.02872	2.16699	0.8	-0.159497	0.181093	1		185	3	162.871	SNP_3574598	0.38	4	4.56526	5.39521	4.75042	13.908	1	-0.0925768	0.737368	1		185	3	162.871	SNP_3574598	0.13	4	0.263158	0.260417	0.1875	0.314124	0.3	0.0378289	0.0350877	1
3A	186	3	163.871		0.35	4	1.70586	2.06057	2.01824	2.16567	0.9	-0.156189	0.198522	0.988		186	3	163.871		0.51	4	4.50935	5.46216	4.69253	13.8588	1.3	-0.0915863	0.861222	0.988		186	3	163.871		0.15	4	0.25798	0.264641	0.184543	0.313974	0.4	0.0367183	0.043379	0.988
3A	187	3	164.191	SNP_1125212	0.35	4	1.70763	2.06228	2.015	2.16574	0.9	-0.153684	0.200967	1		187	3	164.191	SNP_1125212	0.54	4	4.50974	5.4717	4.67796	13.852	1.4	-0.0841078	0.877851	1		187	3	164.191	SNP_1125212	0.16	4	0.25641	0.265957	0.183673	0.313923	0.4	0.0363684	0.0459156	1
3A	188	3	165.191		0.38	4	1.69759	2.04781	2.05518	2.16421	1	-0.178794	0.171421	0.979		188	3	165.191		0.7	4	4.45707	5.54385	4.60767	13.7894	1.8	-0.0753023	1.01148	0.979		188	3	165.191		0.18	4	0.252468	0.269759	0.181035	0.313748	0.5	0.0357166	0.0530072	0.979
3A	189	3	165.843	SNP_3574530	0.4	4	1.69205	2.03753	2.0802	2.16277	1	-0.194074	0.151402	1		189	3	165.843	SNP_3574530	0.79	4	4.432	5.56935	4.5956	13.7666	2	-0.0818	1.05555	1		189	3	165.843	SNP_3574530	0.19	4	0.25	0.271739	0.18	0.313662	0.5	0.035	0.0567391	1
3A	190	3	166.843		0.26	6	1.73755	2.03849	2.05401	2.16871	0.8	-0.15823	0.142704	0.954		190	3	166.843		0.65	6	4.39997	5.55734	4.69255	13.7841	1.8	-0.14629	1.01108	0.954		190	3	166.843		0.29	6	0.267236	0.275379	0.160455	0.312646	0.8	0.0533905	0.0615335	0.954
3A	191	3	167.843		0.12	6	1.81487	2.02208	2.0272	2.1774	0.4	-0.106166	0.101041	0.95		191	3	167.843		0.47	6	4.45417	5.49312	4.80364	13.847	1.4	-0.174737	0.864211	0.95		191	3	167.843		0.41	5	0.288472	0.273012	0.147234	0.311699	1.1	0.0706195	0.0551592	0.95
3A	192	3	168.843		0.03	4	1.90344	1.99546	2.00054	2.18371	0.1	-0.0485497	0.0434622	0.987		192	3	168.843		0.28	4	4.59703	5.3714	4.92299	13.9392	0.7	-0.162984	0.611395	0.987		192	3	168.843		0.54	4	0.302709	0.270702	0.138602	0.310876	1.4	0.0820534	0.0500464	0.987
3A	193	3	169.043	SNP_3574664	0.02	4	1.91867	1.99084	1.9952	2.18434	0	-0.0382667	0.03391	1		193	3	169.043	SNP_3574664	0.25	4	4.63	5.34329	4.94667	13.9559	0.6	-0.158333	0.554961	1		193	3	169.043	SNP_3574664	0.56	4	0.304348	0.270588	0.137255	0.310741	1.4	0.0835465	0.0497869	1
3A	194	3	170.043		0.06	5	1.86663	2.00094	2.02307	2.18152	0.2	-0.0782191	0.0560923	0.958		194	3	170.043		0.79	6	4.17646	5.57048	4.92983	13.7212	2.3	-0.376684	1.01734	0.958		194	3	170.043		0.48	5	0.277887	0.280443	0.140972	0.311367	1.2	0.0684574	0.0710132	0.958
3A	195	3	171.043		0.11	4	1.8426	1.99611	2.05219	2.17934	0.3	-0.104796	0.0487114	0.997		195	3	171.043		1.36	4	3.95083	5.65846	4.92639	13.5644	3.4	-0.48778	1.21985	0.997		195	3	171.043		0.45	4	0.250619	0.288833	0.145613	0.311624	1.1	0.0525028	0.0907172	0.997
3A	196	3	171.085	SNP_3574404	0.11	4	1.84233	1.99557	2.0534	2.17929	0.3	-0.105539	0.0477033	1		196	3	171.085	SNP_3574404	1.38	4	3.945	5.65978	4.92667	13.5605	3.4	-0.490833	1.22394	1		196	3	171.085	SNP_3574404	0.45	4	0.25	0.288889	0.145833	0.311638	1.1	0.0520833	0.0909722	1
3A	197	3	172.085		0.1	4	1.85108	1.98437	2.06389	2.17946	0.3	-0.106402	0.0268894	0.968		197	3	172.085		1.15	5	4.04716	5.64843	4.88218	13.6188	3	-0.417513	1.18376	0.968		197	3	172.085		0.26	6	0.267827	0.272772	0.162819	0.312857	0.7	0.0525037	0.0574493	0.968
3A	198	3	173.085		0.1	4	1.86362	1.97119	2.07281	2.17967	0.3	-0.104591	0.00297552	0.978		198	3	173.085		0.87	5	4.21292	5.59001	4.86069	13.725	2.3	-0.323884	1.05321	0.978		198	3	173.085		0.13	5	0.286653	0.246588	0.194859	0.314064	0.4	0.0458969	0.00583167	0.978
3A	199	3	173.615	SNP_3575351	0.1	4	1.87116	1.96393	2.07667	2.17975	0.3	-0.102752	-0.00998616	1		199	3	173.615	SNP_3575351	0.71	4	4.32818	5.54012	4.85673	13.7935	1.8	-0.264274	0.94766	1		199	3	173.615	SNP_3575351	0.13	4	0.295455	0.232558	0.211538	0.314181	0.3	0.041958	-0.0209384	1
3A	200	3	174.615		0.13	4	1.88643	1.94038	2.10687	2.17797	0.3	-0.110223	-0.0562718	0.976		200	3	174.615		0.53	4	4.37177	5.45154	4.98068	13.8523	1.4	-0.304454	0.775313	0.976		200	3	174.615		0.1	4	0.288217	0.233054	0.215346	0.314413	0.2	0.0364357	-0.0187272	0.976
3A	201	3	175.615		0.16	4	1.90142	1.92311	2.12687	2.17637	0.4	-0.112729	-0.0910389	0.992		201	3	175.615		0.39	4	4.42783	5.34208	5.13292	13.9031	1	-0.352546	0.561708	0.992		201	3	175.615		0.07	4	0.281013	0.233609	0.219447	0.314619	0.2	0.0307831	-0.0166217	0.992
3A	202	3	175.745	SNP_1114370	0.16	4	1.9033	1.92154	2.12837	2.17624	0.4	-0.112532	-0.0942968	0.997		202	3	175.745	SNP_1114370	0.38	4	4.4358	5.32749	5.15298	13.9082	1	-0.358591	0.533103	0.997		202	3	175.745	SNP_1114370	0.07	4	0.280087	0.233685	0.219998	0.314644	0.2	0.0300442	-0.0163581	0.997
3A	203	3	176.745		0.13	4	1.91994	1.91856	2.11416	2.17768	0.4	-0.097109	-0.0984902	0.967		203	3	176.745		0.38	4	4.42779	5.33014	5.14561	13.9071	1	-0.35891	0.543443	0.967		203	3	176.745		0.07	4	0.278094	0.238124	0.215392	0.314647	0.2	0.031351	-0.00861866	0.967
3A	204	3	177.745		0.11	4	1.93729	1.91716	2.09758	2.17915	0.3	-0.080146	-0.10027	0.969		204	3	177.745		0.37	4	4.42778	5.32496	5.14302	13.9104	0.9	-0.357617	0.539555	0.969		204	3	177.745		0.07	4	0.275458	0.242832	0.211064	0.31463	0.2	0.0321969	-0.000429358	0.969
3A	205	3	178.643	SNP_982276	0.09	4	1.95326	1.91711	2.08135	2.18039	0.2	-0.0640452	-0.100193	1		205	3	178.643	SNP_982276	0.36	4	4.435	5.31353	5.14434	13.9171	0.9	-0.35467	0.52386	1		205	3	178.643	SNP_982276	0.07	4	0.272727	0.247059	0.207547	0.314594	0.2	0.0325901	0.0069216	1
3A	206	3	179.643		0.22	6	1.9295	1.87895	2.15581	2.17093	0.7	-0.113156	-0.163699	0.953		206	3	179.643		0.25	5	4.5336	5.28875	5.1128	13.9511	0.7	-0.289599	0.465557	0.953		206	3	179.643		0.06	4	0.281486	0.227524	0.23105	0.314667	0.2	0.0252179	-0.0287444	0.953
3A	207	3	180.643		0.33	4	1.90619	1.8703	2.18204	2.16632	0.9	-0.137927	-0.173811	0.995		207	3	180.643		0.15	4	4.66412	5.23581	5.09445	13.9906	0.4	-0.215163	0.356529	0.995		207	3	180.643		0.14	4	0.288585	0.208202	0.253565	0.314088	0.3	0.0175099	-0.0628733	0.995
3A	208	3	180.7	SNP_3575240	0.34	4	1.90488	1.87064	2.18222	2.16627	0.9	-0.138671	-0.172913	1		208	3	180.7	SNP_3575240	0.14	4	4.67209	5.23226	5.09364	13.9928	0.4	-0.210774	0.349395	1		208	3	180.7	SNP_3575240	0.14	4	0.288902	0.207312	0.254545	0.314046	0.4	0.0171783	-0.0644119	1
3A	209	3	181.7		0.41	6	1.93149	1.82868	2.22091	2.15711	1.3	-0.144711	-0.247525	0.932		209	3	181.7		0.26	5	4.59619	5.37529	4.95136	13.9414	0.7	-0.177585	0.601517	0.932		209	3	181.7		0.09	5	0.280421	0.213284	0.251711	0.31441	0.2	0.0143546	-0.0527819	0.932
3A	210	3	182.7		0.5	7	1.96847	1.78925	2.246	2.148	1.7	-0.138767	-0.317982	0.901		210	3	182.7		0.46	6	4.52312	5.53367	4.78951	13.848	1.4	-0.133195	0.87735	0.901		210	3	182.7		0.04	6	0.270017	0.223447	0.244569	0.314822	0.1	0.0127237	-0.0338457	0.901
3A	211	3	183.7		0.61	7	2.01468	1.75789	2.24918	2.14172	2	-0.117249	-0.37404	0.906		211	3	183.7		0.74	6	4.47046	5.67105	4.65067	13.7383	2.2	-0.090105	1.11049	0.906		211	3	183.7		0.01	4	0.258538	0.23636	0.234853	0.315078	0	0.0118422	-0.0103357	0.906
3A	212	3	184.7		0.74	6	2.05774	1.73655	2.23723	2.13825	2.2	-0.0897447	-0.410935	0.948		212	3	184.7		1.03	5	4.44882	5.76659	4.55635	13.6512	2.8	-0.0537605	1.26401	0.948		212	3	184.7		0.01	5	0.247232	0.249016	0.226189	0.315076	0	0.0105214	0.0123059	0.948
3A	213	3	185.399	SNP_3574354	0.83	4	2.07729	1.7325	2.22148	2.13901	2.1	-0.0720949	-0.416887	1		213	3	185.399	SNP_3574354	1.22	4	4.4528	5.80705	4.51574	13.6153	3	-0.0314704	1.32278	1		213	3	185.399	SNP_3574354	0.03	4	0.24	0.25641	0.222222	0.314973	0.1	0.00888889	0.0252991	1
3A	214	3	186.399		0.83	6	2.07664	1.72052	2.24496	2.13281	2.4	-0.0841627	-0.440277	0.958		214	3	186.399		1.2	5	4.42577	5.82341	4.50096	13.5898	3.2	-0.0375934	1.36005	0.958		214	3	186.399		0.02	5	0.240306	0.25628	0.221682	0.314969	0.1	0.00931155	0.0252855	0.958
3A	215	3	187.399		0.83	7	2.07533	1.70823	2.27005	2.12587	2.7	-0.0973626	-0.464462	0.918		215	3	187.399		1.18	6	4.39872	5.83919	4.48708	13.5642	3.4	-0.0441793	1.39629	0.918		215	3	187.399		0.02	5	0.240802	0.255967	0.22125	0.314969	0.1	0.00977593	0.0249408	0.918
3A	216	3	188.399		0.83	9	2.07313	1.69603	2.29641	2.1183	3.1	-0.111642	-0.488737	0.881		216	3	188.399		1.15	7	4.37178	5.85422	4.47429	13.5387	3.6	-0.0512542	1.43118	0.881		216	3	188.399		0.02	6	0.241527	0.255442	0.220951	0.314973	0.1	0.0102878	0.0242025	0.881
3A	217	3	189.399		0.83	10	2.0697	1.68452	2.32355	2.11033	3.4	-0.126927	-0.512107	0.846		217	3	189.399		1.13	8	4.34512	5.86832	4.46281	13.5139	3.8	-0.0588455	1.46436	0.846		217	3	189.399		0.02	7	0.242524	0.254664	0.220815	0.314981	0.1	0.0108542	0.0229946	0.846
3A	218	3	190.399		0.84	11	2.06467	1.67411	2.35118	2.10213	3.8	-0.143256	-0.533812	0.814		218	3	190.399		1.1	8	4.31894	5.88125	4.45292	13.49	3.9	-0.0669897	1.49531	0.814		218	3	190.399		0.02	7	0.243846	0.253588	0.220878	0.314993	0.1	0.0114842	0.0212263	0.814
3A	219	3	191.399		0.84	12	2.05766	1.66506	2.37926	2.09383	4.2	-0.1608	-0.553406	0.784		219	3	191.399		1.08	9	4.29333	5.89294	4.44474	13.4672	4.1	-0.0757034	1.5239	0.784		219	3	191.399		0.02	7	0.245542	0.252174	0.221172	0.315009	0.1	0.0121849	0.0188166	0.784
3A	220	3	192.399		0.85	13	2.04834	1.65734	2.40806	2.08537	4.6	-0.179862	-0.570868	0.757		220	3	192.399		1.05	10	4.26851	5.90316	4.43856	13.4461	4.3	-0.0850241	1.54963	0.757		220	3	192.399		0.01	8	0.247639	0.250398	0.221722	0.315026	0	0.0129586	0.0157167	0.757
3A	221	3	193.399		0.87	14	2.03648	1.65072	2.43811	2.07655	5	-0.200817	-0.586572	0.732		221	3	193.399		1.03	10	4.24472	5.9116	4.43472	13.4271	4.4	-0.0950003	1.57189	0.732		221	3	193.399		0.01	8	0.250212	0.248194	0.222577	0.315041	0	0.0138176	0.0117997	0.732
3A	222	3	194.399		0.88	15	2.02203	1.64483	2.47004	2.06701	5.4	-0.224005	-0.601197	0.71		222	3	194.399		1	11	4.22193	5.91842	4.43318	13.4103	4.5	-0.105622	1.59087	0.71		222	3	194.399		0.01	7	0.253287	0.245539	0.223764	0.315049	0	0.0147617	0.00701338	0.71
3A	223	3	195.399		0.91	16	2.00523	1.63921	2.50437	2.05633	5.9	-0.249572	-0.615594	0.69		223	3	195.399		0.98	12	4.20039	5.92334	4.43425	13.3961	4.6	-0.116931	1.60602	0.69		223	3	195.399		0.01	7	0.256834	0.242458	0.225278	0.315045	0	0.0157776	0.00140236	0.69
3A	224	3	196.399		0.94	17	1.98673	1.63342	2.54126	2.04418	6.5	-0.277265	-0.630582	0.672		224	3	196.399		0.96	12	4.18032	5.92612	4.43827	13.385	4.7	-0.128971	1.61682	0.672		224	3	196.399		0.01	10	0.26101	0.238812	0.227212	0.315019	0.1	0.0168987	-0.00529917	0.672
3A	225	3	197.399		0.98	19	1.96761	1.62716	2.58031	2.03044	7.1	-0.306351	-0.646793	0.656		225	3	197.399		0.94	13	4.16159	5.92709	4.44496	13.3765	4.7	-0.141684	1.62382	0.656		225	3	197.399		0.02	11	0.265689	0.234697	0.229533	0.314961	0.1	0.0180781	-0.0129141	0.656
3A	226	3	198.399		1.03	20	1.94911	1.62069	2.61992	2.01564	7.8	-0.335408	-0.663823	0.643		226	3	198.399		0.92	13	4.14451	5.92584	4.45478	13.3715	4.8	-0.155133	1.6262	0.643		226	3	198.399		0.02	13	0.270887	0.230088	0.23227	0.314861	0.1	0.0193089	-0.0214905	0.643
3A	227	3	199.399		1.08	21	1.93236	1.61432	2.65849	2.00052	8.5	-0.363063	-0.681108	0.631		227	3	199.399		0.9	14	4.12887	5.92287	4.46728	13.3691	4.8	-0.169205	1.62479	0.631		227	3	199.399		0.02	14	0.276449	0.225101	0.235376	0.31471	0.1	0.0205362	-0.0308114	0.631
3A	228	3	200.399		1.14	21	1.91801	1.6086	2.6942	1.9861	9.1	-0.388096	-0.6975	0.622		228	3	200.399		0.89	14	4.11498	5.91781	4.48287	13.3699	4.8	-0.183942	1.61889	0.622		228	3	200.399		0.03	15	0.282257	0.219814	0.238831	0.314502	0.2	0.0217126	-0.0407295	0.622
3A	229	3	201.399		1.2	22	1.90621	1.60383	2.72616	1.97303	9.7	-0.409975	-0.712356	0.615		229	3	201.399		0.87	14	4.10272	5.911	4.50119	13.3734	4.8	-0.199234	1.60905	0.615		229	3	201.399		0.04	16	0.288129	0.214358	0.242582	0.314235	0.3	0.0227734	-0.0509979	0.615
3A	230	3	202.399		1.25	22	1.89685	1.60049	2.75327	1.96213	10.2	-0.428207	-0.724571	0.61		230	3	202.399		0.86	14	4.09208	5.90259	4.52206	13.3794	4.7	-0.214988	1.59552	0.61		230	3	202.399		0.05	16	0.293836	0.208904	0.246548	0.313917	0.4	0.0236439	-0.0612881	0.61
3A	231	3	203.399		1.31	23	1.88967	1.59862	2.77532	1.95367	10.6	-0.442826	-0.733877	0.608		231	3	203.399		0.85	15	4.08289	5.89303	4.54493	13.3871	4.7	-0.231022	1.57911	0.608		231	3	203.399		0.07	17	0.299249	0.203544	0.250691	0.313555	0.5	0.0242789	-0.0714259	0.608
3A	232	3	204.399		1.36	23	1.8844	1.59852	2.79168	1.94814	10.9	-0.453641	-0.739515	0.607		232	3	204.399		0.85	15	4.07544	5.88197	4.57011	13.3971	4.6	-0.247335	1.55919	0.607		232	3	204.399		0.09	17	0.304147	0.198455	0.254906	0.313168	0.6	0.0246208	-0.0810715	0.607
3A	233	3	205.399		1.4	22	1.88076	1.60026	2.80214	1.94569	11	-0.460687	-0.741193	0.609		233	3	205.399		0.84	14	4.06971	5.86961	4.59729	13.4089	4.5	-0.263789	1.53611	0.609		233	3	205.399		0.1	17	0.308451	0.193709	0.25914	0.31277	0.8	0.0246552	-0.0900868	0.609
3A	234	3	206.399		1.44	22	1.87854	1.60367	2.80699	1.94616	10.9	-0.464225	-0.739102	0.613		234	3	206.399		0.84	14	4.06537	5.85667	4.62554	13.4215	4.4	-0.280083	1.51121	0.613		234	3	206.399		0.12	16	0.31207	0.189394	0.263311	0.31238	0.9	0.0243794	-0.0982968	0.613
3A	235	3	207.399		1.48	21	1.8775	1.60883	2.8061	1.94957	10.8	-0.464301	-0.732974	0.619		235	3	207.399		0.84	14	4.06256	5.84305	4.65481	13.435	4.3	-0.296127	1.48437	0.619		235	3	207.399		0.14	16	0.315041	0.185499	0.267388	0.312006	1	0.0238266	-0.105716	0.619
3A	236	3	208.399		1.5	20	1.87744	1.61552	2.80003	1.95553	10.5	-0.461294	-0.723215	0.627		236	3	208.399		0.85	14	4.06125	5.82893	4.68477	13.4493	4.2	-0.31176	1.45592	0.627		236	3	208.399		0.16	15	0.317323	0.182096	0.271269	0.311664	1.1	0.0230268	-0.112201	0.627
3A	237	3	209.399		1.53	19	1.87816	1.62352	2.78935	1.9636	10.1	-0.455597	-0.710237	0.637		237	3	209.399		0.85	13	4.06153	5.81425	4.71531	13.4642	4.1	-0.326891	1.42582	0.637		237	3	209.399		0.19	15	0.319004	0.17914	0.274929	0.311357	1.2	0.0220375	-0.117826	0.637
3A	238	3	210.399		1.54	18	1.87948	1.63258	2.7748	1.97329	9.7	-0.447657	-0.694564	0.649		238	3	210.399		0.86	13	4.06313	5.7996	4.74559	13.479	4	-0.34123	1.39524	0.649		238	3	210.399		0.21	14	0.32008	0.176683	0.278266	0.311098	1.3	0.0209069	-0.12249	0.649
3A	239	3	211.399		1.55	17	1.88125	1.64243	2.75713	1.9841	9.2	-0.43794	-0.676766	0.664		239	3	211.399		0.87	12	4.06627	5.78467	4.77585	13.4943	3.9	-0.354787	1.36361	0.664		239	3	211.399		0.23	14	0.320645	0.174673	0.281258	0.310886	1.4	0.0196935	-0.126279	0.664
3A	240	3	212.399		1.56	16	1.88333	1.65281	2.73711	1.99557	8.7	-0.426888	-0.657407	0.681		240	3	212.399		0.88	12	4.07069	5.76996	4.80532	13.5093	3.8	-0.367313	1.33196	0.681		240	3	212.399		0.25	13	0.320713	0.173141	0.283826	0.310728	1.4	0.0184437	-0.129128	0.681
3A	241	3	213.399		1.57	15	1.88561	1.66351	2.71541	2.0073	8.1	-0.414901	-0.636997	0.7		241	3	213.399		0.9	11	4.07656	5.75517	4.83425	13.5244	3.7	-0.378843	1.29977	0.7		241	3	213.399		0.28	12	0.32035	0.172056	0.285949	0.310625	1.4	0.0172007	-0.131093	0.7
3A	242	3	214.399		1.57	13	1.88797	1.67438	2.69253	2.01903	7.6	-0.402278	-0.615872	0.721		242	3	214.399		0.91	10	4.08376	5.74055	4.86226	13.5395	3.6	-0.389252	1.26753	0.721		242	3	214.399		0.3	11	0.319602	0.171399	0.287608	0.310576	1.5	0.0159971	-0.132206	0.721
3A	243	3	215.399		1.57	12	1.89038	1.68516	2.66913	2.03043	7.1	-0.389374	-0.594598	0.745		243	3	215.399		0.93	10	4.09216	5.72627	4.88903	13.5544	3.5	-0.398436	1.23567	0.745		243	3	215.399		0.32	11	0.318526	0.17113	0.288815	0.310576	1.5	0.0148558	-0.13254	0.745
3A	244	3	216.399		1.57	11	1.89277	1.69581	2.64548	2.0414	6.6	-0.376353	-0.573319	0.771		244	3	216.399		0.95	9	4.10187	5.71207	4.91482	13.5692	3.4	-0.406477	1.20373	0.771		244	3	216.399		0.34	10	0.317138	0.171252	0.289552	0.310626	1.4	0.0137926	-0.132093	0.771
3A	245	3	217.399		1.57	10	1.89511	1.70625	2.62186	2.05185	6.1	-0.363374	-0.552236	0.799		245	3	217.399		0.97	8	4.11277	5.69811	4.93941	13.584	3.3	-0.413321	1.17202	0.799		245	3	217.399		0.36	9	0.31549	0.171716	0.28986	0.31072	1.4	0.0128151	-0.130959	0.799
3A	246	3	218.399		1.57	9	1.89736	1.71642	2.59847	2.06172	5.7	-0.350557	-0.531494	0.83		246	3	218.399		0.99	8	4.12475	5.68446	4.96267	13.5986	3.2	-0.418955	1.14075	0.83		246	3	218.399		0.37	8	0.313624	0.172483	0.289772	0.31085	1.4	0.0119259	-0.129215	0.83
3A	247	3	219.399		1.57	8	1.89951	1.72629	2.57548	2.07098	5.2	-0.337985	-0.511199	0.864		247	3	219.399		1.01	7	4.13785	5.67097	4.98477	13.6132	3.1	-0.423463	1.10966	0.864		247	3	219.399		0.39	7	0.311578	0.173514	0.289331	0.311012	1.3	0.0111232	-0.12694	0.864
3A	248	3	220.399		1.57	7	1.90154	1.73584	2.55298	2.07964	4.8	-0.325718	-0.491422	0.899		248	3	220.399		1.03	6	4.15194	5.6577	5.00566	13.6278	3	-0.426859	1.0789	0.899		248	3	220.399		0.41	7	0.309393	0.174763	0.288588	0.311196	1.3	0.0104024	-0.124227	0.899
3A	249	3	221.399		1.57		1.90347	1.74505	2.53106	2.08769	4.5	-0.313796	-0.472211	0.938		249	3	221.399		1.05	5	4.16695	5.64465	5.02534	13.6422	2.9	-0.429195	1.04851	0.938		249	3	221.399		0.42	6	0.307097	0.176198	0.287581	0.311398	1.2	0.00975798	-0.121142	0.938
3A	250	3	222.399		1.57	5	1.90528	1.75393	2.50977	2.09517	4.1	-0.302243	-0.453597	0.979		250	3	222.399		1.07	5	4.18281	5.63182	5.04387	13.6566	2.8	-0.430528	1.01848	0.979		250	3	222.399		0.43	5	0.304728	0.177774	0.286363	0.311611	1.1	0.00918274	-0.117772	0.979
3A	251	3	222.88	SNP_3575284	1.57	4	1.90611	1.75807	2.49976	2.09856	4	-0.296822	-0.444861	1		251	3	222.88	SNP_3575284	1.08	4	4.19071	5.62571	5.05238	13.6634	2.7	-0.430833	1.00417	1		251	3	222.88	SNP_3575284	0.44	4	0.303571	0.178571	0.285714	0.311715	1.1	0.00892857	-0.116071	1

## Sheet: C4
Chromosme	48hai	Intervall (0.95)	2.6													72hai	Intervall (0.95)	2.7													Macro	Intervall (0.95)	2.7
	Nr	Group	Position	Locus	LOD	# Iter.	mu_A	mu_H	mu_B	Variance	% Expl.	Additive	Dominance	GIC		Nr	Group	Position	Locus	LOD	# Iter.	mu_A	mu_H	mu_B	Variance	% Expl.	Additive	Dominance	GIC		Nr	Group	Position	Locus	LOD	# Iter.	mu_A	mu_H	mu_B	Variance	% Expl.	Additive	Dominance	GIC
4A	1	1	0	SNP_3020621	0.21	4	1.87326	1.94056	2.16227	2.18051	0.5	-0.144508	-0.0772087	1		1	1	0	SNP_3020621	0.19	4	5.34326	4.75609	4.80851	12.1757	0.5	0.267373	-0.319796	1		1	1	0	SNP_3020621	1.91	4	0.616279	0.418478	0.382979	0.165047	4.7	0.11665	-0.0811506	1
4A	2	1	0.667	SNP_1117837	0.24	4	1.9437	1.89841	2.18302	2.17867	0.6	-0.119664	-0.16495	1		2	1	0.667	SNP_1117837	0.19	4	5.31891	4.80311	4.7037	12.176	0.5	0.307609	-0.208193	1		2	1	0.667	SNP_1117837	1.8	4	0.603261	0.422222	0.375	0.165502	4.4	0.11413	-0.0669082	1
4A	3	1	1.12	SNP_981458	0.05	4	1.94915	1.94701	2.07767	2.18923	0.1	-0.0642627	-0.0664002	1		3	1	1.12	SNP_981458	0.26	4	5.37447	4.68416	4.86587	12.1535	0.7	0.254299	-0.436012	1		3	1	1.12	SNP_981458	1.76	4	0.601064	0.418539	0.380435	0.165641	4.4	0.110315	-0.07221	1
4A	4	1	2.12		0.08	4	1.89394	1.96885	2.08331	2.18761	0.2	-0.0946831	-0.0197738	0.978		4	1	2.12		0.13	4	5.26414	4.7805	4.80718	12.1924	0.3	0.228481	-0.255162	0.978		4	1	2.12		1.57	6	0.600952	0.42085	0.383815	0.165949	4.2	0.108569	-0.0715331	0.978
4A	5	1	2.893	SNP_1861695	0.12	4	1.85182	1.99024	2.07687	2.18565	0.3	-0.112528	0.0258887	1		5	1	2.893	SNP_1861695	0.07	4	5.15341	4.86805	4.76569	12.2136	0.2	0.193861	-0.0915017	1		5	1	2.893	SNP_1861695	1.22	4	0.579545	0.433908	0.387255	0.167958	3	0.0961453	-0.0494921	1
4A	6	1	3.638	SNP_1026364	0.1	4	1.85182	2.00259	2.055	2.18648	0.3	-0.101591	0.0491791	1		6	1	3.638	SNP_1026364	0.06	4	5.15341	4.85221	4.79385	12.2149	0.2	0.179781	-0.121418	1		6	1	3.638	SNP_1026364	1.21	4	0.579545	0.43314	0.389423	0.168002	3	0.0950612	-0.0513447	1
4A	7	1	4.638		0.12	4	1.84896	1.99059	2.07675	2.1856	0.3	-0.113894	0.027731	0.958		7	1	4.638		0.08	5	5.20706	4.80979	4.82655	12.207	0.2	0.190254	-0.207019	0.958		7	1	4.638		1.38	5	0.595997	0.426557	0.39055	0.166996	3.6	0.102723	-0.0667162	0.958
4A	8	1	5.638		0.14	4	1.84669	1.97837	2.09954	2.18434	0.4	-0.126425	0.00525387	0.935		8	1	5.638		0.1	6	5.2617	4.76733	4.86465	12.1956	0.3	0.198523	-0.295844	0.935		8	1	5.638		1.56	6	0.610991	0.420783	0.392421	0.166021	4.1	0.109285	-0.0809229	0.935
4A	9	1	6.638		0.16	5	1.84489	1.96687	2.12181	2.18278	0.4	-0.138456	-0.0164796	0.931		9	1	6.638		0.13	6	5.30399	4.73366	4.9037	12.1842	0.4	0.200147	-0.370187	0.931		9	1	6.638		1.73	6	0.623103	0.416283	0.394778	0.16522	4.6	0.114163	-0.0926573	0.931
4A	10	1	7.638		0.19	5	1.84343	1.95694	2.14183	2.18111	0.5	-0.149196	-0.035693	0.947		10	1	7.638		0.15	6	5.31955	4.71672	4.93921	12.1787	0.5	0.190171	-0.412662	0.947		10	1	7.638		1.89	6	0.631767	0.413234	0.397376	0.164681	4.9	0.117195	-0.101338	0.947
4A	11	1	8.638		0.22	4	1.84223	1.94918	2.15817	2.1796	0.6	-0.15797	-0.0510207	0.982		11	1	8.638		0.16	5	5.30026	4.71913	4.96904	12.1825	0.4	0.165612	-0.415524	0.982		11	1	8.638		2.01	5	0.637027	0.411663	0.400047	0.164443	5.1	0.11849	-0.106874	0.982
4A	12	1	9.01	SNP_3574333	0.23	4	1.84184	1.94691	2.16311	2.17913	0.6	-0.160635	-0.0555617	1		12	1	9.01	SNP_3574333	0.16	4	5.285	4.72406	4.97875	12.1858	0.4	0.153125	-0.407812	1		12	1	9.01	SNP_3574333	2.05	4	0.638158	0.411458	0.401042	0.164434	5.1	0.118558	-0.108141	1
4A	13	1	10.01		0.16	5	1.85186	1.95584	2.13565	2.18223	0.5	-0.141891	-0.0379104	0.955		13	1	10.01		0.22	5	5.36393	4.67544	5.00338	12.1599	0.6	0.180277	-0.508218	0.955		13	1	10.01		1.86	5	0.633011	0.409603	0.406619	0.164807	4.8	0.113196	-0.110211	0.955
4A	14	1	11.01		0.1	5	1.86329	1.97031	2.09657	2.18575	0.3	-0.116637	-0.00962062	0.932		14	1	11.01		0.3	5	5.43356	4.62973	5.02626	12.1315	0.8	0.203654	-0.600176	0.932		14	1	11.01		1.64	6	0.624745	0.408695	0.412512	0.165435	4.5	0.106116	-0.109933	0.932
4A	15	1	12.01		0.06	5	1.87618	1.98881	2.04932	2.18862	0.2	-0.0865698	0.0260663	0.929		15	1	12.01		0.37	5	5.48598	4.59211	5.04387	12.1058	1.1	0.221054	-0.672818	0.929		15	1	12.01		1.38	7	0.612245	0.409519	0.418292	0.166398	3.9	0.0969768	-0.105749	0.929
4A	16	1	13.01		0.04	5	1.89115	2.00693	2.00218	2.19004	0.1	-0.0555134	0.0602596	0.947		16	1	13.01		0.44	5	5.51718	4.56578	5.05373	12.0875	1.2	0.231723	-0.719679	0.947		16	1	13.01		1.1	6	0.593833	0.413211	0.423658	0.167787	3.1	0.0850875	-0.0955349	0.947
4A	17	1	14.01		0.04	4	1.90849	2.02042	1.96283	2.19025	0.1	-0.0271691	0.0847625	0.986		17	1	14.01		0.5	4	5.52718	4.55153	5.05515	12.079	1.3	0.236016	-0.73963	0.986		17	1	14.01		0.81	5	0.5685	0.420633	0.42867	0.169531	2.1	0.0699148	-0.077952	0.986
4A	18	1	14.277	SNP_3575016	0.04	4	1.91341	2.02303	1.95404	2.19019	0.1	-0.020314	0.0893051	1		18	1	14.277	SNP_3575016	0.51	4	5.52659	4.54967	5.0542	12.0784	1.3	0.236193	-0.740722	1		18	1	14.277	SNP_3575016	0.74	4	0.560976	0.423077	0.43	0.169995	1.9	0.0654878	-0.0724109	1
4A	19	1	15.277		0.03	5	1.92939	2.02138	1.94249	2.19051	0.1	-0.00654886	0.0854381	0.966		19	1	15.277		0.63	6	5.54179	4.46551	5.2032	12.0236	1.7	0.169296	-0.906987	0.966		19	1	15.277		0.76	4	0.56442	0.425807	0.424594	0.169881	1.9	0.0699129	-0.0686998	0.966
4A	20	1	16.277		0.02	5	1.94686	2.01805	1.93348	2.19077	0.1	0.0066903	0.0778815	0.949		20	1	16.277		0.77	6	5.54987	4.39607	5.33011	11.9637	2.2	0.10988	-1.04393	0.949		20	1	16.277		0.78	4	0.567509	0.428803	0.419066	0.169765	2	0.0742215	-0.0644847	0.949
4A	21	1	17.277		0.02	5	1.96566	2.01232	1.9286	2.19103	0.1	0.0185328	0.0651877	0.949		21	1	17.277		0.9	6	5.54761	4.35691	5.41249	11.9225	2.6	0.0675595	-1.12314	0.949		21	1	17.277		0.81	4	0.570208	0.431943	0.413633	0.169646	2.1	0.0782875	-0.0599775	0.949
4A	22	1	18.277		0.02	5	1.98546	2.00431	1.92799	2.19128	0	0.0287341	0.0475917	0.966		22	1	18.277		1	5	5.53344	4.34419	5.45843	11.9058	2.7	0.0375087	-1.15175	0.966		22	1	18.277		0.84	4	0.572488	0.435102	0.408503	0.169529	2.1	0.0819921	-0.0553935	0.966
4A	23	1	19.277		0.02	4	2.00568	1.99516	1.93	2.19138	0	0.0378378	0.027327	1		23	1	19.277		1.06	4	5.5073	4.35065	5.47962	11.9095	2.7	0.013841	-1.14281	1		23	1	19.277		0.87	4	0.574324	0.438172	0.403846	0.169419	2.2	0.0852391	-0.0509132	1
4A	24	1	19.277	SNP_3574430	0.02	4	2.00568	1.99516	1.93	2.19138	0	0.0378378	0.027327	1		24	1	19.277	SNP_3574430	1.06	4	5.5073	4.35065	5.47962	11.9095	2.7	0.013841	-1.14281	1		24	1	19.277	SNP_3574430	0.87	4	0.574324	0.438172	0.403846	0.169419	2.2	0.0852391	-0.0509132	1
4A	25	1	20.277		0.02	4	1.92342	2.01268	1.96496	2.19103	0.1	-0.020772	0.0684863	0.984		25	1	20.277		1.15	5	5.56791	4.28852	5.45434	11.8647	3	0.0567837	-1.2226	0.984		25	1	20.277		0.79	5	0.568116	0.432791	0.412971	0.169697	2	0.0775726	-0.0577523	0.984
4A	26	1	20.673	SNP_1091769	0.04	4	1.89525	2.01884	1.97863	2.18997	0.1	-0.0416887	0.0818985	1		26	1	20.673	SNP_1091769	1.1	4	5.5085	4.31091	5.43741	11.8999	2.7	0.0355463	-1.16204	1		26	1	20.673	SNP_1091769	0.75	4	0.5625	0.431818	0.416667	0.169971	1.9	0.0729167	-0.0577652	1
4A	27	1	21.673		0.03	4	1.90044	2.01747	1.97535	2.19023	0.1	-0.0374545	0.0795727	0.959		27	1	21.673		1.08	5	5.54474	4.29711	5.45014	11.8779	2.9	0.0473043	-1.20033	0.959		27	1	21.673		0.71	5	0.562811	0.434134	0.414065	0.169982	1.9	0.0743728	-0.0543039	0.959
4A	28	1	22.673		0.03	5	1.90703	2.01555	1.97212	2.19052	0.1	-0.0325429	0.0759824	0.925		28	1	22.673		1.05	6	5.57185	4.29174	5.45558	11.8653	3	0.0581366	-1.22197	0.925		28	1	22.673		0.68	6	0.561992	0.437017	0.411218	0.17004	1.8	0.0753871	-0.0495886	0.925
4A	29	1	23.673		0.02	5	1.91513	2.01303	1.96901	2.19085	0.1	-0.0269426	0.07096	0.9		29	1	23.673		0.99	7	5.58648	4.29606	5.45346	11.8646	3	0.0665086	-1.22391	0.9		29	1	23.673		0.64	6	0.559919	0.440464	0.40817	0.170141	1.8	0.0758744	-0.0435805	0.9
4A	30	1	24.673		0.02	6	1.92474	2.00991	1.96609	2.19118	0.1	-0.0206772	0.0644999	0.882		30	1	24.673		0.92	7	5.58547	4.31103	5.44372	11.8772	2.9	0.0708753	-1.20357	0.882		30	1	24.673		0.61	6	0.556507	0.44445	0.404975	0.170278	1.7	0.0757658	-0.0362906	0.882
4A	31	1	25.673		0.01	6	1.93577	2.00626	1.96339	2.19149	0	-0.0138144	0.0566799	0.873		31	1	25.673		0.83	7	5.56621	4.33717	5.42659	11.9033	2.7	0.0698116	-1.15923	0.873		31	1	25.673		0.57	6	0.55173	0.448923	0.401693	0.17044	1.6	0.0750184	-0.0277888	0.873
4A	32	1	26.673		0.01	6	1.94792	2.00224	1.96089	2.19176	0	-0.00648421	0.0478354	0.871		32	1	26.673		0.73	7	5.52697	4.37443	5.40268	11.9416	2.4	0.0621441	-1.0904	0.871		32	1	26.673		0.54	6	0.545639	0.453801	0.398388	0.170608	1.5	0.0736255	-0.0182118	0.871
4A	33	1	27.673		0	5	1.96079	1.99809	1.95854	2.19196	0	0.00112455	0.0384256	0.878		33	1	27.673		0.61	7	5.46748	4.4219	5.37298	11.9889	2	0.047253	-0.99833	0.878		33	1	27.673		0.51	6	0.538369	0.458977	0.395116	0.170765	1.4	0.0716264	-0.00776536	0.878
4A	34	1	28.673		0	5	1.97378	1.99409	1.95624	2.19206	0	0.00877082	0.0290834	0.892		34	1	28.673		0.5	7	5.39	4.47752	5.33884	12.04	1.6	0.0255834	-0.886901	0.892		34	1	28.673		0.5	6	0.530152	0.464316	0.391926	0.17089	1.3	0.0691134	0.00327718	0.892
4A	35	1	29.673		0	5	1.98638	1.99046	1.95396	2.19207	0	0.0162097	0.0202924	0.914		35	1	29.673		0.4	6	5.30004	4.53788	5.30182	12.0891	1.2	-0.000892294	-0.763044	0.914		35	1	29.673		0.49	5	0.521313	0.469668	0.388851	0.170966	1.3	0.0662308	0.0145859	0.914
4A	36	1	30.673		0.01	4	1.99812	1.98735	1.95169	2.19201	0	0.0232145	0.0124513	0.945		36	1	30.673		0.3	5	5.20586	4.59875	5.2635	12.1314	0.8	-0.0288186	-0.635936	0.945		36	1	30.673		0.5	5	0.512242	0.47487	0.385913	0.170984	1.3	0.0631644	0.0257932	0.945
4A	37	1	31.673		0.01	4	2.00867	1.98485	1.94945	2.1919	0	0.029607	0.00579442	0.983		37	1	31.673		0.22	4	5.11559	4.65637	5.22516	12.1643	0.6	-0.0547879	-0.514002	0.983		37	1	31.673		0.52	4	0.503347	0.479773	0.383124	0.170942	1.3	0.0601119	0.0365375	0.983
4A	38	1	32.064	SNP_3574144	0.01	3	2.01242	1.98404	1.9486	2.19185	0	0.0319121	0.00353043	1		38	1	32.064	SNP_3574144	0.19	4	5.08265	4.67747	5.21038	12.1746	0.5	-0.0638651	-0.469039	1		38	1	32.064	SNP_3574144	0.53	4	0.5	0.481579	0.382075	0.170911	1.3	0.0589623	0.0405412	1
4A	39	1	33.064		0.12	5	2.02881	2.03732	1.84075	2.18459	0.4	0.094032	0.102538	0.975		39	1	33.064		0.2	4	5.05583	4.66943	5.23581	12.1694	0.5	-0.0899895	-0.476392	0.975		39	1	33.064		0.59	5	0.500087	0.485033	0.377063	0.17057	1.5	0.0615119	0.0464572	0.975
4A	40	1	34.064		0.33	4	2.04521	2.07697	1.76301	2.17288	0.9	0.1411	0.172854	0.989		40	1	34.064		0.2	4	5.01357	4.67781	5.24413	12.1717	0.5	-0.115282	-0.451041	0.989		40	1	34.064		0.63	4	0.500035	0.486615	0.375019	0.170415	1.6	0.0625076	0.0490881	0.989
4A	41	1	34.35	SNP_1862041	0.39	4	2.05	2.08446	1.74846	2.17	1	0.150769	0.185226	1		41	1	34.35	SNP_1862041	0.2	4	4.99912	4.68298	5.24352	12.1735	0.5	-0.1222	-0.438339	1		41	1	34.35	SNP_1862041	0.64	4	0.5	0.486702	0.375	0.17041	1.6	0.0625	0.0492021	1
4A	42	1	35.35		0.4	5	2.05623	2.08772	1.73648	2.16789	1.1	0.159876	0.191363	0.957		42	1	35.35		0.16	5	4.9851	4.69585	5.2331	12.179	0.5	-0.123999	-0.413249	0.957		42	1	35.35		0.66	5	0.50256	0.487405	0.371276	0.170175	1.7	0.0656418	0.050487	0.957
4A	43	1	36.35		0.41	6	2.06328	2.08999	1.72569	2.16595	1.2	0.168794	0.195502	0.918		43	1	36.35		0.13	6	4.9676	4.71298	5.21704	12.1862	0.4	-0.124724	-0.37934	0.918		43	1	36.35		0.68	6	0.505192	0.488005	0.367648	0.169937	1.9	0.0687721	0.0515851	0.918
4A	44	1	37.35		0.41	6	2.0713	2.09104	1.71642	2.16427	1.3	0.177437	0.197176	0.883		44	1	37.35		0.1	6	4.94632	4.735	5.19426	12.1949	0.3	-0.123971	-0.335291	0.883		44	1	37.35		0.7	7	0.507883	0.488485	0.364164	0.169702	2	0.0718591	0.0524614	0.883
4A	45	1	38.35		0.42	7	2.08042	2.09073	1.70889	2.16292	1.3	0.185762	0.196079	0.852		45	1	38.35		0.07	7	4.92109	4.76247	5.16367	12.2046	0.2	-0.121289	-0.279911	0.852		45	1	38.35		0.72	7	0.510614	0.488831	0.36087	0.169473	2.2	0.0748716	0.0530892	0.852
4A	46	1	39.35		0.42	8	2.09079	2.08895	1.70325	2.16193	1.4	0.193767	0.19193	0.825		46	1	39.35		0.04	7	4.89174	4.79606	5.12398	12.2146	0.2	-0.116121	-0.211799	0.825		46	1	39.35		0.74	8	0.513355	0.489041	0.357799	0.169253	2.3	0.0777781	0.0534636	0.825
4A	47	1	40.35		0.42	8	2.10255	2.08563	1.69958	2.16131	1.4	0.201486	0.184561	0.801		47	1	40.35		0.02	7	4.8583	4.8362	5.07414	12.2236	0.1	-0.107916	-0.130017	0.801		47	1	40.35		0.76	8	0.516079	0.489111	0.354982	0.169047	2.4	0.0805485	0.0535808	0.801
4A	48	1	41.35		0.41	8	2.11574	2.08079	1.69783	2.16102	1.4	0.208957	0.174001	0.78		48	1	41.35		0.01	7	4.82103	4.88307	5.01337	12.2297	0	-0.0961695	-0.0341349	0.78		48	1	41.35		0.78	8	0.518742	0.48905	0.352438	0.168857	2.5	0.0831518	0.0534602	0.78
4A	49	1	42.35		0.41	8	2.13032	2.07451	1.69791	2.161	1.4	0.216203	0.160393	0.764		49	1	42.35		0.01	6	4.78051	4.93627	4.94168	12.2308	0	-0.0805848	0.0751707	0.764		49	1	42.35		0.8	9	0.521291	0.488875	0.35018	0.168685	2.6	0.0855555	0.0531402	0.764
4A	50	1	43.35		0.4	8	2.14613	2.06694	1.6997	2.16117	1.4	0.223213	0.144024	0.751		50	1	43.35		0.02	9	4.73707	4.99564	4.8588	12.2244	0.1	-0.0608603	0.197709	0.751		50	1	43.35		0.81	9	0.523687	0.488594	0.348224	0.168535	2.7	0.0877311	0.0526382	0.751
4A	51	1	44.35		0.4	8	2.16288	2.05829	1.70304	2.16145	1.4	0.229922	0.125326	0.742		51	1	44.35		0.04	10	4.69213	5.05919	4.76725	12.2081	0.2	-0.0375626	0.329502	0.742		51	1	44.35		0.83	9	0.525873	0.488225	0.346579	0.168408	2.8	0.0896472	0.0519989	0.742
4A	52	1	45.35		0.4	7	2.18017	2.04879	1.70777	2.16176	1.4	0.236204	0.104818	0.736		52	1	45.35		0.08	11	4.64702	5.12456	4.67044	12.1811	0.4	-0.0117121	0.465835	0.736		52	1	45.35		0.84	9	0.5278	0.487785	0.345251	0.168308	2.8	0.0912745	0.0512595	0.736
4A	53	1	46.35		0.39	7	2.19729	2.03885	1.71361	2.16205	1.4	0.241841	0.0833973	0.733		53	1	46.35		0.14	11	4.60346	5.18849	4.57348	12.1442	0.7	0.0149927	0.60002	0.733		53	1	46.35		0.85	9	0.529423	0.487289	0.34425	0.168236	2.9	0.0925862	0.0504526	0.733
4A	54	1	47.35		0.39	8	2.21388	2.02866	1.72045	2.16229	1.4	0.246716	0.0614982	0.735		54	1	47.35		0.2	12	4.56281	5.24828	4.48089	12.1001	1.1	0.0409628	0.726433	0.735		54	1	47.35		0.86	9	0.530703	0.486748	0.343585	0.168194	2.9	0.093559	0.0496038	0.735
4A	55	1	48.35		0.39	9	2.2291	2.01863	1.72808	2.16251	1.4	0.250508	0.0400352	0.739		55	1	48.35		0.28	12	4.52652	5.30111	4.3976	12.0532	1.5	0.0644627	0.839054	0.739		55	1	48.35		0.86	9	0.531615	0.48617	0.343267	0.168184	2.9	0.0941738	0.0487291	0.739
4A	56	1	49.35		0.38	9	2.24207	2.00918	1.73628	2.16277	1.3	0.252896	0.0200052	0.748		56	1	49.35		0.36	11	4.49538	5.34548	4.32645	12.0079	1.9	0.0844642	0.934566	0.748		56	1	49.35		0.87	9	0.532142	0.485558	0.343308	0.168207	2.9	0.0944171	0.0478338	0.748
4A	57	1	50.35		0.38	9	2.25229	2.00057	1.74486	2.16314	1.3	0.253713	0.00199521	0.76		57	1	50.35		0.45	11	4.46956	5.3811	4.2683	11.9674	2.2	0.10063	1.01217	0.76		57	1	50.35		0.87	9	0.53228	0.484912	0.343718	0.168263	2.9	0.0942809	0.0469124	0.76
4A	58	1	51.35		0.38	9	2.25935	1.99302	1.75367	2.16368	1.3	0.25284	-0.0134963	0.775		58	1	51.35		0.54	10	4.44923	5.40766	4.22391	11.9345	2.5	0.112658	1.07109	0.775		58	1	51.35		0.86	8	0.532045	0.484221	0.344516	0.168354	2.8	0.0937647	0.0459409	0.775
4A	59	1	52.35		0.37	9	2.26311	1.98664	1.76258	2.16445	1.3	0.250263	-0.0262072	0.794		59	1	52.35		0.62	10	4.43398	5.42597	4.1923	11.9102	2.7	0.120843	1.11283	0.794		59	1	52.35		0.86	8	0.531442	0.483489	0.345701	0.168477	2.7	0.0928705	0.0449179	0.794
4A	60	1	53.35		0.37	8	2.2636	1.98146	1.77147	2.16546	1.2	0.246064	-0.0360698	0.817		60	1	53.35		0.7	9	4.42355	5.43648	4.1729	11.8952	2.8	0.12532	1.13826	0.817		60	1	53.35		0.85	8	0.530506	0.4827	0.347284	0.168632	2.6	0.0916112	0.0438057	0.817
4A	61	1	54.35		0.37	7	2.26121	1.9774	1.78028	2.16669	1.2	0.240465	-0.0433437	0.843		61	1	54.35		0.77	8	4.41736	5.44023	4.16431	11.8888	2.8	0.126527	1.14939	0.843		61	1	54.35		0.84	7	0.529274	0.481847	0.349265	0.168816	2.5	0.0900044	0.0425773	0.843
4A	62	1	55.35		0.36	7	2.25642	1.97429	1.78895	2.1681	1.1	0.233735	-0.0483986	0.873		62	1	55.35		0.83	8	4.41488	5.4382	4.16505	11.8901	2.8	0.124918	1.14824	0.873		62	1	55.35		0.83	7	0.527775	0.48093	0.351627	0.169026	2.4	0.0880744	0.0412285	0.873
4A	63	1	56.35		0.35	6	2.24963	1.97203	1.79744	2.16964	1	0.226097	-0.0515006	0.907		63	1	56.35		0.89	7	4.41565	5.43128	4.17384	11.8979	2.8	0.120905	1.13653	0.907		63	1	56.35		0.82	6	0.526053	0.479947	0.354346	0.169256	2.3	0.0858533	0.0397471	0.907
4A	64	1	57.35		0.34	5	2.24136	1.97045	1.8057	2.17125	1	0.21783	-0.0530813	0.945		64	1	57.35		0.94	6	4.41916	5.42045	4.18913	11.9107	2.6	0.115017	1.1163	0.945		64	1	57.35		0.8	5	0.524141	0.478909	0.35738	0.169501	2.1	0.0833805	0.0381483	0.945
4A	65	1	58.35		0.34	4	2.23206	1.9694	1.81372	2.17288	0.9	0.209169	-0.0534882	0.987		65	1	58.35		0.98	5	4.42499	5.40663	4.20947	11.9271	2.5	0.107759	1.08939	0.987		65	1	58.35		0.78	4	0.522075	0.47783	0.360671	0.169754	2	0.0807021	0.0364569	0.987
4A	66	1	58.651	SNP_3575314	0.33	4	2.22912	1.96918	1.81609	2.17336	0.9	0.206515	-0.053427	1		66	1	58.651	SNP_3575314	0.99	4	4.42714	5.402	4.21638	11.9326	2.5	0.10538	1.08024	1		66	1	58.651	SNP_3575314	0.78	4	0.521429	0.4775	0.361702	0.169832	1.9	0.0798632	0.0359347	1
4A	67	1	59.651		0.34	4	2.22874	1.97156	1.8055	2.17241	0.9	0.211619	-0.0455577	0.959		67	1	59.651		0.87	5	4.41619	5.39109	4.24777	11.9479	2.3	0.0842122	1.05911	0.959		67	1	59.651		0.83	6	0.530102	0.476611	0.354423	0.169275	2.3	0.0878394	0.0343488	0.959
4A	68	1	60.651		0.35	5	2.22678	1.97431	1.79506	2.1716	0.9	0.215858	-0.0366156	0.928		68	1	60.651		0.74	6	4.41306	5.37027	4.29401	11.9735	2.1	0.0595248	1.01674	0.928		68	1	60.651		0.88	7	0.538821	0.474621	0.349209	0.168795	2.5	0.094806	0.030606	0.928
4A	69	1	61.651		0.35	5	2.22334	1.97726	1.7851	2.17096	1	0.219117	-0.0269547	0.906		69	1	61.651		0.6	6	4.41842	5.33809	4.35835	12.0094	1.8	0.030038	0.949708	0.906		69	1	61.651		0.93	7	0.547099	0.471655	0.346317	0.168426	2.8	0.100391	0.0249468	0.906
4A	70	1	62.651		0.36	5	2.21856	1.98025	1.77595	2.17052	1	0.221304	-0.0170002	0.894		70	1	62.651		0.47	7	4.43231	5.29376	4.44339	12.0535	1.5	-0.00553933	0.855911	0.894		70	1	62.651		0.96	8	0.554383	0.467988	0.345731	0.168184	2.9	0.104326	0.0179314	0.894
4A	71	1	63.651		0.36	5	2.21265	1.9831	1.76794	2.1703	1	0.222354	-0.00719254	0.892		71	1	63.651		0.34	7	4.45391	5.23794	4.5495	12.1008	1.1	-0.0477925	0.736236	0.892		71	1	63.651		0.98	8	0.560277	0.463845	0.347414	0.168082	3	0.106432	0.00999947	0.892
4A	72	1	64.651		0.36	5	2.20582	1.98565	1.76134	2.17031	1	0.222239	0.00206802	0.9		72	1	64.651		0.24	6	4.48131	5.1738	4.67222	12.1441	0.7	-0.0954553	0.597034	0.9		72	1	64.651		0.99	8	0.564627	0.45934	0.351373	0.168124	2.9	0.106627	0.00134054	0.9
4A	73	1	65.651		0.36	5	2.19829	1.98778	1.75635	2.17056	1	0.22097	0.0104622	0.917		73	1	65.651		0.16	6	4.51174	5.10702	4.80172	12.1766	0.5	-0.144992	0.450295	0.917		73	1	65.651		0.99	7	0.567456	0.454542	0.357541	0.168292	2.8	0.104958	-0.00795648	0.917
4A	74	1	66.651		0.36	5	2.19025	1.98943	1.75306	2.17104	1	0.218598	0.0177735	0.943		74	1	66.651		0.12	5	4.54243	5.04362	4.92669	12.1955	0.3	-0.192128	0.309061	0.943		74	1	66.651		0.99	6	0.568877	0.449638	0.365459	0.168545	2.7	0.101709	-0.0175297	0.943
4A	75	1	67.651		0.36	4	2.18188	1.99056	1.75146	2.17172	0.9	0.215207	0.0238899	0.98		75	1	67.651		0.1	4	4.57136	4.98778	5.0389	12.2025	0.3	-0.233768	0.182649	0.98		75	1	67.651		0.99	5	0.569043	0.445001	0.374127	0.168824	2.5	0.0974577	-0.0265842	0.98
4A	76	1	68.111	SNP_3574360	0.36	4	2.17795	1.99091	1.75128	2.1721	0.9	0.213333	0.0262937	1		76	1	68.111	SNP_3574360	0.1	4	4.58375	4.96515	5.08512	12.2027	0.3	-0.250686	0.130713	1		76	1	68.111	SNP_3574360	0.98	4	0.56875	0.443069	0.378049	0.16895	2.5	0.0953506	-0.0303301	1
4A	77	1	69.097	SNP_3575329	0.18	4	2.15366	1.95533	1.86705	2.18186	0.5	0.143307	-0.0550259	1		77	1	69.097	SNP_3575329	0.12	4	4.57357	4.97223	5.08348	12.1989	0.3	-0.254953	0.143709	1		77	1	69.097	SNP_3575329	1.68	4	0.607143	0.425532	0.380435	0.166011	4.2	0.113354	-0.0682569	1
4A	78	1	70.097		0.24	5	2.19127	1.93928	1.87207	2.17846	0.6	0.159602	-0.0923927	0.964		78	1	70.097		0.1	4	4.58725	4.9795	5.04735	12.2038	0.3	-0.230052	0.162203	0.964		78	1	70.097		1.45	6	0.600548	0.432354	0.37579	0.166529	3.9	0.112379	-0.055815	0.964
4A	79	1	71.097		0.29	4	2.22136	1.92171	1.8882	2.17555	0.8	0.166582	-0.133069	0.995		79	1	71.097		0.07	4	4.63055	4.97596	5.00867	12.2127	0.2	-0.189059	0.156352	0.995		79	1	71.097		1.09	5	0.571889	0.448433	0.372491	0.168415	2.8	0.0996994	-0.0237572	0.995
4A	80	1	71.168	SNP_3575321	0.3	4	2.22308	1.92065	1.88933	2.17537	0.8	0.166872	-0.13556	1		80	1	71.168	SNP_3575321	0.07	4	4.6345	4.97537	5.00596	12.2134	0.2	-0.185729	0.15514	1		80	1	71.168	SNP_3575321	1.07	4	0.56875	0.45	0.37234	0.168585	2.7	0.0982048	-0.0205452	1
4A	81	1	72.168		0.39	7	2.27971	1.90074	1.87397	2.16588	1.2	0.202871	-0.176101	0.94		81	1	72.168		0.12	5	4.5718	4.93741	5.13891	12.1946	0.3	-0.283553	0.082055	0.94		81	1	72.168		1.13	6	0.581019	0.441953	0.3769	0.167932	3	0.102059	-0.037007	0.94
4A	82	1	73.168		0.43	7	2.29417	1.8988	1.85741	2.16208	1.4	0.218378	-0.176993	0.91		82	1	73.168		0.21	5	4.51609	4.89417	5.26827	12.1636	0.6	-0.37609	0.00199304	0.91		82	1	73.168		1.16	6	0.585365	0.436647	0.381702	0.167653	3.2	0.101831	-0.0468869	0.91
4A	83	1	74.168		0.44	6	2.27962	1.91058	1.84056	2.16304	1.3	0.219534	-0.149514	0.91		83	1	74.168		0.31	5	4.46902	4.85718	5.37002	12.1272	0.9	-0.450499	-0.0623387	0.91		83	1	74.168		1.14	6	0.582853	0.433848	0.386564	0.167784	3.1	0.0981446	-0.0508606	0.91
4A	84	1	75.168		0.43	5	2.25115	1.92963	1.8258	2.1659	1.2	0.212673	-0.108849	0.941		84	1	75.168		0.42	5	4.43155	4.83393	5.43292	12.0954	1.1	-0.500688	-0.098307	0.941		84	1	75.168		1.09	5	0.575096	0.433122	0.391297	0.168239	2.9	0.0918991	-0.0500744	0.941
4A	85	1	76.13	SNP_3574955	0.41	4	2.21891	1.95117	1.81536	2.16887	1.1	0.201775	-0.0659674	1		85	1	76.13	SNP_3574955	0.52	4	4.40574	4.82492	5.45922	12.0747	1.3	-0.526737	-0.10756	1		85	1	76.13	SNP_3574955	1	4	0.56383	0.434372	0.395458	0.168889	2.5	0.0841859	-0.045272	1
4A	86	1	77.13		0.57	4	2.30809	1.88808	1.86155	2.1591	1.5	0.22327	-0.196739	0.962		86	1	77.13		0.22	5	4.62876	4.80919	5.32347	12.164	0.6	-0.347357	-0.166926	0.962		86	1	77.13		0.64	6	0.540957	0.453474	0.387666	0.170217	1.7	0.0766457	-0.010837	0.962
4A	87	1	77.531	SNP_1112535	0.66	4	2.33725	1.87033	1.8837	2.15489	1.7	0.226777	-0.240143	1		87	1	77.531	SNP_1112535	0.12	4	4.73732	4.82032	5.225	12.1977	0.3	-0.243841	-0.160836	1		87	1	77.531	SNP_1112535	0.51	4	0.518293	0.465054	0.385417	0.170975	1.3	0.066438	0.0131991	1
4A	88	1	78.529	SNP_3574347	0.67	4	2.33846	1.90846	1.81851	2.15446	1.7	0.259975	-0.170025	1		88	1	78.529	SNP_3574347	0.17	4	4.64925	4.82731	5.27367	12.1806	0.4	-0.312212	-0.13415	1		88	1	78.529	SNP_3574347	0.49	4	0.50625	0.473118	0.382653	0.171052	1.2	0.0617985	0.0286667	1
4A	89	1	79.43	SNP_1127385	0.64	4	2.31095	1.91831	1.80885	2.15595	1.7	0.251053	-0.141586	1		89	1	79.43	SNP_1127385	0.13	4	4.56209	4.95729	5.10704	12.1935	0.3	-0.272472	0.122729	1		89	1	79.43	SNP_1127385	0.47	4	0.523256	0.458824	0.398148	0.17114	1.2	0.0625538	-0.00187845	1
4A	90	1	80.43		0.59	5	2.30493	1.92021	1.80979	2.1572	1.6	0.247572	-0.137153	0.96		90	1	80.43		0.16	4	4.61661	4.85248	5.23286	12.1823	0.4	-0.308125	-0.0722545	0.96		90	1	80.43		0.43	4	0.525275	0.453635	0.404347	0.171291	1.1	0.0604642	-0.0111757	0.96
4A	91	1	81.43		0.52	5	2.28897	1.92597	1.8123	2.16023	1.5	0.238336	-0.124672	0.943		91	1	81.43		0.25	5	4.67709	4.74973	5.35658	12.1519	0.7	-0.339744	-0.267107	0.943		91	1	81.43		0.39	5	0.527184	0.447353	0.412675	0.171434	1	0.0572549	-0.0225762	0.943
4A	92	1	82.43		0.45	5	2.26089	1.9368	1.81642	2.1651	1.2	0.222236	-0.10185	0.95		92	1	82.43		0.39	5	4.73395	4.65985	5.4645	12.1092	1	-0.365276	-0.439369	0.95		92	1	82.43		0.37	5	0.528623	0.440495	0.42252	0.171527	1	0.0530517	-0.0350767	0.95
4A	93	1	83.43		0.36	5	2.22138	1.95227	1.82238	2.17111	1	0.199499	-0.0696038	0.98		93	1	83.43		0.54	4	4.7771	4.59036	5.54854	12.065	1.4	-0.385722	-0.57246	0.98		93	1	83.43		0.37	4	0.52919	0.433735	0.433016	0.171554	1	0.0480866	-0.0473685	0.98
4A	94	1	83.859	SNP_3574277	0.33	4	2.20238	1.95953	1.8256	2.17366	0.9	0.18839	-0.0544611	1		94	1	83.859	SNP_3574277	0.61	4	4.78953	4.5677	5.57654	12.0483	1.5	-0.393502	-0.615336	1		94	1	83.859	SNP_3574277	0.38	4	0.52907	0.431034	0.4375	0.171548	1	0.0457849	-0.0522504	1
4A	95	1	83.979	SNP_999542	0.39	4	2.20238	1.98012	1.78673	2.17026	1	0.207823	-0.0144415	1		95	1	83.979	SNP_999542	0.74	4	4.78953	4.53318	5.65588	12.0067	1.9	-0.433174	-0.689527	1		95	1	83.979	SNP_999542	0.38	4	0.52907	0.431818	0.436275	0.171552	1	0.0463976	-0.050854	1
4A	96	1	84.553	SNP_1345661	0.4	4	2.20238	1.98548	1.78549	2.16968	1	0.208445	-0.00845938	1		96	1	84.553	SNP_1345661	0.63	4	4.78953	4.55384	5.58	12.0406	1.6	-0.395233	-0.63093	1		96	1	84.553	SNP_1345661	0.38	4	0.52907	0.43314	0.433962	0.171555	1	0.0475538	-0.0483765	1
4A	97	1	85.553		0.37	4	2.19091	1.98919	1.78498	2.17086	1	0.202961	0.00124532	0.955		97	1	85.553		0.61	5	4.82253	4.53821	5.59015	12.0342	1.6	-0.383809	-0.66813	0.955		97	1	85.553		0.35	5	0.527072	0.435442	0.431357	0.171629	0.9	0.0478571	-0.0437726	0.955
4A	98	1	86.553		0.33	5	2.17712	1.99365	1.78517	2.17225	0.9	0.195977	0.0125033	0.919		98	1	86.553		0.59	6	4.85744	4.52397	5.59575	12.0294	1.7	-0.369156	-0.702625	0.919		98	1	86.553		0.31	5	0.524263	0.438415	0.428218	0.171724	0.9	0.0480226	-0.0378251	0.919
4A	99	1	87.553		0.3	5	2.16115	1.99878	1.78617	2.17381	0.8	0.187489	0.0251265	0.891		99	1	87.553		0.57	6	4.89317	4.51211	5.5957	12.0268	1.7	-0.351266	-0.73232	0.891		99	1	87.553		0.28	6	0.520562	0.442087	0.424561	0.171831	0.8	0.0480003	-0.0304744	0.891
4A	100	1	88.553		0.26	6	2.1432	2.00448	1.78811	2.17547	0.8	0.177546	0.0388286	0.871		100	1	88.553		0.54	7	4.92854	4.50369	5.58892	12.0274	1.7	-0.330191	-0.755045	0.871		100	1	88.553		0.25	6	0.515914	0.446429	0.42049	0.17194	0.7	0.0477123	-0.0217735	0.871
4A	101	1	89.553		0.23	6	2.12363	2.01053	1.79116	2.17717	0.7	0.166235	0.0531342	0.86		101	1	89.553		0.52	7	4.96234	4.49976	5.57437	12.0318	1.7	-0.306015	-0.768598	0.86		101	1	89.553		0.23	6	0.51034	0.451317	0.416212	0.172037	0.7	0.0470639	-0.0119592	0.86
4A	102	1	90.553		0.2	6	2.10289	2.0167	1.7955	2.17885	0.6	0.153693	0.0675045	0.857		102	1	90.553		0.49	7	4.9936	4.50112	5.55129	12.0405	1.6	-0.278846	-0.771328	0.857		102	1	90.553		0.22	6	0.503979	0.456534	0.412014	0.17211	0.6	0.0459826	-0.00146278	0.857
4A	103	1	91.553		0.18	6	2.08148	2.02272	1.80129	2.18045	0.5	0.140093	0.081337	0.862		103	1	91.553		0.45	7	5.02169	4.5082	5.51937	12.0536	1.5	-0.248838	-0.762333	0.862		103	1	91.553		0.21	6	0.497116	0.461787	0.408183	0.172152	0.6	0.0444664	0.009137	0.862
4A	104	1	92.553		0.16	6	2.05991	2.02832	1.80864	2.18194	0.5	0.125633	0.094051	0.875		104	1	92.553		0.42	7	5.04638	4.5209	5.47893	12.0705	1.3	-0.216273	-0.741762	0.875		104	1	92.553		0.21	6	0.490143	0.466771	0.40494	0.17216	0.6	0.0426016	0.019229	0.875
4A	105	1	93.553		0.14	6	2.03865	2.03329	1.81759	2.1833	0.4	0.110534	0.105171	0.896		105	1	93.553		0.38	6	5.06779	4.53851	5.4311	12.0899	1.2	-0.181657	-0.710931	0.896		105	1	93.553		0.22	6	0.48345	0.471236	0.402397	0.172141	0.6	0.0405268	0.0283127	0.896
4A	106	1	94.553		0.12	5	2.01813	2.03748	1.82805	2.18449	0.4	0.095039	0.114399	0.926		106	1	94.553		0.35	6	5.08631	4.55972	5.37792	12.11	1	-0.145807	-0.672391	0.926		106	1	94.553		0.23	5	0.477319	0.475039	0.400571	0.172107	0.6	0.038374	0.0360936	0.926
4A	107	1	95.553		0.11	5	1.99862	2.04088	1.83979	2.18551	0.3	0.0794168	0.121674	0.964		107	1	95.553		0.32	5	5.10237	4.58295	5.32189	12.1293	0.9	-0.109759	-0.629177	0.964		107	1	95.553		0.25	5	0.471882	0.478139	0.399418	0.17207	0.7	0.0362321	0.0424891	0.964
4A	108	1	96.345	SNP_3574744	0.11	4	1.98404	2.04302	1.84977	2.18618	0.3	0.0671349	0.126116	1		108	1	96.345	SNP_3574744	0.3	4	5.11362	4.6017	5.27723	12.1432	0.7	-0.0818085	-0.593721	1		108	1	96.345	SNP_3574744	0.27	4	0.468085	0.480114	0.398936	0.172045	0.7	0.0345745	0.046603	1
4A	109	1	97.345		0.15	5	1.98703	2.05532	1.82313	2.18346	0.4	0.0819466	0.150239	0.952		109	1	97.345		0.32	5	5.12608	4.57827	5.31121	12.128	0.9	-0.0925691	-0.640373	0.952		109	1	97.345		0.27	5	0.470154	0.480154	0.396379	0.171959	0.7	0.0368876	0.0468873	0.952
4A	110	1	98.345		0.19	5	1.99019	2.06794	1.79599	2.18016	0.6	0.0970987	0.174855	0.912		110	1	98.345		0.33	6	5.13488	4.55879	5.34042	12.1146	1	-0.102766	-0.67886	0.912		110	1	98.345		0.28	5	0.472303	0.480015	0.394057	0.171878	0.8	0.0391232	0.0468351	0.912
4A	111	1	99.345		0.25	6	1.9936	2.08058	1.76895	2.17634	0.7	0.112326	0.199305	0.879		111	1	99.345		0.33	6	5.13929	4.54479	5.36241	12.1045	1.1	-0.111559	-0.706055	0.879		111	1	99.345		0.28	6	0.474483	0.479703	0.392012	0.171804	0.8	0.0412355	0.0464548	0.879
4A	112	1	100.345		0.3	6	1.99737	2.09288	1.74265	2.17213	0.9	0.127356	0.222868	0.853		112	1	100.345		0.33	7	5.13869	4.53757	5.37518	12.0994	1.1	-0.118244	-0.71936	0.853		112	1	100.345		0.29	6	0.476641	0.479229	0.39028	0.17174	0.8	0.0431802	0.0457685	0.853
4A	113	1	101.345		0.37	6	2.00157	2.10448	1.7177	2.16767	1.1	0.141935	0.244847	0.834		113	1	101.345		0.32	7	5.13263	4.53824	5.37713	12.1002	1.1	-0.122247	-0.716636	0.834		113	1	101.345		0.3	7	0.478711	0.478622	0.388878	0.171687	0.9	0.0449162	0.0448277	0.834
4A	114	1	102.345		0.43	6	2.0063	2.11507	1.69462	2.16315	1.3	0.155844	0.264609	0.822		114	1	102.345		0.29	7	5.12098	4.54736	5.36757	12.1073	1	-0.123297	-0.696918	0.822		114	1	102.345		0.3	7	0.480634	0.477914	0.387819	0.171644	0.9	0.0464072	0.0436874	0.822
4A	115	1	103.345		0.49	6	2.01163	2.12435	1.67381	2.15876	1.5	0.168911	0.281629	0.817		115	1	103.345		0.26	7	5.10392	4.56501	5.34666	12.1201	0.9	-0.121371	-0.660284	0.817		115	1	103.345		0.31	7	0.482349	0.477143	0.387102	0.171613	0.9	0.0476239	0.0424173	0.817
4A	116	1	104.345		0.56	6	2.0176	2.1321	1.65559	2.15467	1.7	0.181002	0.295509	0.82		116	1	104.345		0.22	7	5.08197	4.59074	5.31537	12.1373	0.8	-0.116696	-0.607927	0.82		116	1	104.345		0.31	7	0.48381	0.476346	0.386719	0.171595	0.9	0.0485457	0.0410817	0.82
4A	117	1	105.345		0.62	6	2.0242	2.13816	1.64017	2.15104	1.9	0.192016	0.305974	0.829		117	1	105.345		0.18	7	5.05598	4.62362	5.27542	12.1569	0.6	-0.109722	-0.542079	0.829		117	1	105.345		0.32	6	0.484986	0.475553	0.386662	0.171588	0.9	0.0491618	0.0397291	0.829
4A	118	1	106.345		0.68	6	2.03141	2.14241	1.62767	2.148	2	0.201869	0.312869	0.846		118	1	106.345		0.14	7	5.02701	4.66223	5.22916	12.1768	0.5	-0.101077	-0.465849	0.846		118	1	106.345		0.32	6	0.485859	0.47479	0.386916	0.171594	0.9	0.0494716	0.0384027	0.846
4A	119	1	107.345		0.73	6	2.03914	2.1448	1.61817	2.14563	2.1	0.210488	0.316143	0.87		119	1	107.345		0.1	6	4.99628	4.70488	5.17924	12.1951	0.3	-0.0914817	-0.38288	0.87		119	1	107.345		0.33	6	0.486438	0.474065	0.38747	0.171612	0.9	0.049484	0.037111	0.87
4A	120	1	108.345		0.78	6	2.04729	2.14533	1.61169	2.14398	2.2	0.217803	0.315839	0.901		120	1	108.345		0.07	5	4.96508	4.74968	5.12842	12.2101	0.2	-0.0816671	-0.297068	0.901		120	1	108.345		0.33	5	0.486745	0.473377	0.388314	0.171641	0.9	0.0492157	0.0358474	0.901
4A	121	1	109.345		0.83	5	2.0557	2.14404	1.6082	2.14307	2.2	0.223751	0.312085	0.939		121	1	109.345		0.04	5	4.9346	4.79483	5.07908	12.2213	0.1	-0.0722416	-0.212014	0.939		121	1	109.345		0.33	5	0.486813	0.47272	0.389434	0.171681	0.9	0.0486895	0.0345964	0.939
4A	122	1	110.345		0.86	4	2.0642	2.14102	1.60764	2.14289	2.3	0.228282	0.305099	0.984		122	1	110.345		0.02	4	4.90584	4.83881	5.03307	12.2286	0	-0.0636146	-0.130643	0.984		122	1	110.345		0.33	4	0.486682	0.472076	0.390819	0.171731	0.9	0.0479317	0.0333257	0.984
4A	123	1	110.658	SNP_3574589	0.88	4	2.06685	2.13974	1.60804	2.14297	2.3	0.229404	0.302293	1		123	1	110.658	SNP_3574589	0.01	4	4.89732	4.85212	5.01957	12.2301	0	-0.0611219	-0.106318	1		123	1	110.658	SNP_3574589	0.33	4	0.486607	0.471875	0.391304	0.171748	0.8	0.0476514	0.0329193	1
4A	124	1	111.658		0.91	4	2.00063	2.18246	1.62071	2.14057	2.4	0.189963	0.371787	0.967		124	1	111.658		0.09	5	4.99851	4.72181	5.11933	12.2054	0.2	-0.0604077	-0.337106	0.967		124	1	111.658		0.39	5	0.469799	0.487139	0.387371	0.171501	1	0.041214	0.0585545	0.967
4A	125	1	112.422	SNP_3574719	0.97	4	1.95775	2.209	1.63274	2.13764	2.5	0.162507	0.413752	1		125	1	112.422	SNP_3574719	0.18	4	5.05552	4.64492	5.18183	12.178	0.5	-0.063157	-0.473757	1		125	1	112.422	SNP_3574719	0.47	4	0.458326	0.496887	0.385408	0.171155	1.2	0.0364588	0.0750206	1
4A	126	1	113.422		0.73	5	2.01356	2.15458	1.64653	2.14938	2	0.183518	0.324534	0.962		126	1	113.422		0.14	5	5.03481	4.67837	5.16535	12.189	0.4	-0.0652698	-0.42171	0.962		126	1	113.422		0.29	6	0.457343	0.489489	0.396351	0.171774	0.8	0.0304959	0.062642	0.962
4A	127	1	114.422		0.53	4	2.07882	2.08829	1.68614	2.16146	1.4	0.196337	0.205812	0.981		127	1	114.422		0.11	4	5.0232	4.70651	5.14137	12.1982	0.3	-0.0590862	-0.375774	0.981		127	1	114.422		0.12	5	0.456397	0.477445	0.417512	0.172611	0.3	0.0194421	0.0404905	0.981
4A	128	1	114.742	SNP_1078277	0.49	4	2.09941	2.06582	1.70362	2.16465	1.3	0.197897	0.164308	1		128	1	114.742	SNP_1078277	0.11	4	5.02118	4.71333	5.13447	12.2003	0.3	-0.0566458	-0.364489	1		128	1	114.742	SNP_1078277	0.09	4	0.455882	0.473214	0.425532	0.172829	0.2	0.0151752	0.0325072	1
4A	129	1	115.742		0.63	6	2.07916	2.10983	1.63575	2.15141	1.9	0.221708	0.252371	0.966		129	1	115.742		0.13	4	5.10184	4.68949	5.10044	12.1924	0.3	0.000699984	-0.411645	0.966		129	1	115.742		0.08	4	0.460233	0.470491	0.424526	0.172853	0.2	0.017854	0.0281115	0.966
4A	130	1	116.742		0.72	6	2.05786	2.13079	1.60886	2.14565	2.1	0.224501	0.297436	0.961		130	1	116.742		0.16	4	5.17794	4.67152	5.05971	12.1821	0.4	0.0591114	-0.447306	0.961		130	1	116.742		0.07	4	0.464657	0.467448	0.42413	0.172873	0.2	0.0202633	0.0230552	0.961
4A	131	1	117.742		0.74	5	2.0413	2.131	1.61658	2.14829	2	0.212359	0.302057	0.985		131	1	117.742		0.2	4	5.24455	4.66131	5.01232	12.171	0.5	0.116115	-0.46712	0.985		131	1	117.742		0.07	4	0.469071	0.464213	0.424268	0.172885	0.2	0.0224014	0.0175442	0.985
4A	132	1	118.09	SNP_3575355	0.74	4	2.03667	2.12735	1.62558	2.15071	1.9	0.205543	0.296225	1		132	1	118.09	SNP_3575355	0.22	4	5.2649	4.65966	4.99442	12.1674	0.5	0.135242	-0.470001	1		132	1	118.09	SNP_3575355	0.07	4	0.470588	0.463068	0.424419	0.172886	0.2	0.0230848	0.0155648	1
4A	133	1	118.856	SNP_3034317	1.13	4	1.99157	2.18952	1.55907	2.12866	2.9	0.216249	0.414199	1		133	1	118.856	SNP_3034317	0.23	4	5.27667	4.6525	4.99512	12.1632	0.6	0.140775	-0.483391	1		133	1	118.856	SNP_3034317	0.23	4	0.460784	0.480114	0.401163	0.172207	0.6	0.0298108	0.0491401	1
4A	134	1	119.856		1.22	5	1.98289	2.19736	1.53173	2.12202	3.2	0.22558	0.440046	0.97		134	1	119.856		0.26	5	5.3581	4.6503	4.92546	12.1462	0.7	0.216322	-0.491477	0.97		134	1	119.856		0.5	7	0.435833	0.503425	0.377334	0.170554	1.5	0.0292496	0.0968422	0.97
4A	135	1	120.856		1.25	4	1.97833	2.19568	1.52254	2.12071	3.3	0.227894	0.445244	0.982		135	1	120.856		0.27	5	5.39295	4.6834	4.83858	12.1452	0.7	0.277184	-0.432361	0.982		135	1	120.856		0.77	5	0.419881	0.512747	0.371297	0.169601	2.1	0.0242918	0.117158	0.982
4A	136	1	121.289	SNP_1080311	1.26	4	1.97771	2.19216	1.52439	2.12187	3.2	0.226659	0.44111	1		136	1	121.289	SNP_1080311	0.27	4	5.39083	4.70742	4.79927	12.1499	0.7	0.295783	-0.387631	1		136	1	121.289	SNP_1080311	0.85	4	0.416667	0.513441	0.371951	0.16952	2.1	0.0223577	0.119132	1
4A	137	1	122.289		1.29	5	1.97835	2.20312	1.51332	2.11665	3.5	0.232514	0.457289	0.955		137	1	122.289		0.31	5	5.40523	4.65292	4.8933	12.1357	0.8	0.255969	-0.49635	0.955		137	1	122.289		0.76	5	0.419473	0.512863	0.372386	0.169624	2.1	0.0235433	0.116934	0.955
4A	138	1	123.289		1.31	6	1.97975	2.21266	1.5041	2.11206	3.7	0.237824	0.470735	0.918		138	1	123.289		0.36	6	5.41923	4.58893	5.00363	12.111	1	0.207799	-0.622508	0.918		138	1	123.289		0.66	6	0.423037	0.511429	0.373632	0.169817	2	0.0247021	0.113095	0.918
4A	139	1	124.289		1.33	6	1.98231	2.22027	1.49689	2.10832	3.8	0.242711	0.480668	0.888		139	1	124.289		0.44	7	5.43246	4.51638	5.12713	12.0724	1.3	0.152663	-0.763412	0.888		139	1	124.289		0.57	7	0.427553	0.508959	0.375771	0.170106	1.8	0.0258911	0.107297	0.888
4A	140	1	125.289		1.34	7	1.98638	2.22551	1.4918	2.10564	4	0.247291	0.486419	0.866		140	1	125.289		0.54	8	5.44421	4.43897	5.25586	12.0192	1.8	0.094176	-0.911065	0.866		140	1	125.289		0.47	8	0.433254	0.505239	0.378889	0.170488	1.6	0.0271826	0.0991676	0.866
4A	141	1	126.289		1.35	7	1.99224	2.22799	1.4889	2.10416	4	0.251669	0.487415	0.851		141	1	126.289		0.67	8	5.45338	4.36294	5.37846	11.9554	2.3	0.0374581	-1.05298	0.851		141	1	126.289		0.37	9	0.440364	0.500039	0.383082	0.170949	1.3	0.0286406	0.0883156	0.851
4A	142	1	127.289		1.34	7	1.99998	2.22749	1.48822	2.10394	4	0.25588	0.483387	0.843		142	1	127.289		0.81	8	5.45873	4.29462	5.48517	11.8894	2.8	-0.0132225	-1.17733	0.843		142	1	127.289		0.29	9	0.448955	0.493195	0.388429	0.17145	1	0.0302629	0.0745028	0.843
4A	143	1	128.289		1.33	7	2.00949	2.22398	1.48973	2.10495	4	0.259883	0.474372	0.843		143	1	128.289		0.95	8	5.45921	4.23813	5.57107	11.8296	3.3	-0.0559281	-1.27701	0.843		143	1	128.289		0.21	9	0.458663	0.484838	0.394896	0.171922	0.7	0.0318835	0.0580587	0.843
4A	144	1	129.289		1.31	7	2.02044	2.21764	1.49334	2.10706	3.9	0.26355	0.460745	0.85		144	1	129.289		1.09	8	5.4542	4.19502	5.63567	11.7821	3.7	-0.0907339	-1.34991	0.85		144	1	129.289		0.16	8	0.468527	0.475595	0.402201	0.172289	0.5	0.0331631	0.0402313	0.85
4A	145	1	130.289		1.29	7	2.03232	2.20882	1.49895	2.11005	3.8	0.266683	0.443189	0.864		145	1	130.289		1.22	7	5.44346	4.16518	5.68076	11.7496	4	-0.11865	-1.39693	0.864		145	1	130.289		0.13	7	0.477352	0.466459	0.409763	0.172507	0.4	0.0337945	0.0229018	0.864
4A	146	1	131.289		1.26	6	2.0445	2.19803	1.5064	2.11371	3.6	0.269052	0.422586	0.886		146	1	131.289		1.33	7	5.42716	4.14756	5.70902	11.7325	4.1	-0.140931	-1.42053	0.886		146	1	131.289		0.12	6	0.484413	0.458265	0.416938	0.172594	0.4	0.0337377	0.0075891	0.886
4A	147	1	132.289		1.23	6	2.05634	2.18587	1.51548	2.1178	3.4	0.27043	0.399955	0.915		147	1	132.289		1.42	6	5.4057	4.14094	5.72296	11.7299	4.1	-0.158629	-1.42339	0.915		147	1	132.289		0.13	6	0.48961	0.451403	0.423283	0.172595	0.4	0.0331633	-0.00504384	0.915
4A	148	1	133.289		1.2	5	2.06732	2.17286	1.52601	2.12214	3.2	0.270652	0.3762	0.952		148	1	133.289		1.5	5	5.3797	4.14386	5.72499	11.7399	4	-0.172643	-1.40849	0.952		148	1	133.289		0.14	5	0.493167	0.445918	0.428626	0.172555	0.4	0.0322707	-0.0149788	0.952
4A	149	1	134.289		1.17	4	2.07702	2.15952	1.53777	2.12657	3	0.269629	0.352128	0.996		149	1	134.289		1.55	4	5.34995	4.15485	5.71731	11.76	3.9	-0.183681	-1.37877	0.996		149	1	134.289		0.16	4	0.495393	0.441681	0.432989	0.172506	0.4	0.0312018	-0.0225101	0.996
4A	150	1	134.378	SNP_3575037	1.16	4	2.07782	2.15833	1.53886	2.12697	3	0.269477	0.349992	1		150	1	134.378	SNP_3575037	1.56	4	5.34714	4.15617	5.71622	11.7622	3.9	-0.18454	-1.37551	1		150	1	134.378	SNP_3575037	0.16	4	0.495536	0.441358	0.433333	0.172502	0.4	0.0311012	-0.0230765	1
4A	151	1	135.378		1.4	5	2.07399	2.18202	1.49079	2.11273	3.6	0.291598	0.399631	0.977		151	1	135.378		2.15	5	5.4034	4.03119	5.92328	11.561	5.5	-0.259938	-1.63215	0.977		151	1	135.378		0.22	4	0.502553	0.437358	0.432534	0.172254	0.5	0.0350094	-0.030186	0.977
4A	152	1	136.378		1.62	4	2.07191	2.19783	1.45691	2.10182	4.1	0.307497	0.433422	0.997		152	1	136.378		2.67	4	5.42575	3.96285	6.04478	11.4338	6.5	-0.309513	-1.77241	0.997		152	1	136.378		0.28	4	0.508725	0.433933	0.431863	0.172002	0.7	0.038431	-0.0363613	0.997
4A	153	1	136.443	SNP_2276396	1.63	4	2.07185	2.19863	1.45512	2.10122	4.2	0.308368	0.435141	1		153	1	136.443	SNP_2276396	2.7	4	5.426	3.95988	6.05045	11.4281	6.6	-0.312227	-1.77835	1		153	1	136.443	SNP_2276396	0.28	4	0.509091	0.433735	0.431818	0.171986	0.7	0.0386364	-0.0367196	1
4A	154	1	137.443		1.63	5	2.06317	2.20827	1.43364	2.09529	4.4	0.314761	0.459864	0.969		154	1	137.443		2.94	6	5.42777	3.91578	6.21562	11.2971	7.7	-0.393926	-1.90591	0.969		154	1	137.443		0.22	5	0.503586	0.437214	0.431904	0.172219	0.6	0.035841	-0.0305312	0.969
4A	155	1	138.443		1.56	5	2.05505	2.20605	1.43666	2.09781	4.3	0.309194	0.460194	0.956		155	1	138.443		3.09	6	5.41849	3.89992	6.31727	11.2266	8.2	-0.449389	-1.96796	0.956		155	1	138.443		0.16	5	0.496676	0.441668	0.431905	0.172473	0.4	0.0323855	-0.0226233	0.956
4A	156	1	139.443		1.44	5	2.04766	2.19495	1.45676	2.10623	3.9	0.29545	0.442739	0.963		156	1	139.443		3.13	6	5.39494	3.91348	6.34834	11.2294	8.2	-0.4767	-1.95816	0.963		156	1	139.443		0.11	5	0.488437	0.446881	0.432047	0.172716	0.3	0.028195	-0.0133609	0.963
4A	157	1	140.443		1.29	4	2.04084	2.17632	1.49111	2.11888	3.4	0.274868	0.410348	0.99		157	1	140.443		3.04	5	5.35302	3.95878	6.30848	11.3079	7.6	-0.477732	-1.87196	0.99		157	1	140.443		0.07	4	0.479605	0.452167	0.43265	0.172906	0.2	0.0234775	-0.00396115	0.99
4A	158	1	140.712	SNP_1112356	1.24	4	2.03907	2.17024	1.5025	2.12277	3.2	0.268287	0.399454	1		158	1	140.712	SNP_1112356	3	4	5.33818	3.97674	6.28585	11.3413	7.3	-0.473836	-1.83527	1		158	1	140.712	SNP_1112356	0.06	4	0.477273	0.453488	0.432927	0.172946	0.1	0.0221729	-0.00161141	1
4A	159	1	141.712		1.2	5	2.03908	2.17283	1.49519	2.12059	3.3	0.271945	0.405696	0.963		159	1	141.712		3.02	6	5.33763	3.95989	6.3707	11.2719	7.9	-0.516535	-1.89427	0.963		159	1	141.712		0.06	4	0.475747	0.455352	0.431448	0.172953	0.1	0.0221491	0.00175453	0.963
4A	160	1	142.712		1.15	6	2.03971	2.17284	1.4927	2.11986	3.3	0.273502	0.406634	0.933		160	1	142.712		3	6	5.32741	3.95343	6.44012	11.2217	8.3	-0.556359	-1.93034	0.933		160	1	142.712		0.05	4	0.473838	0.457416	0.429941	0.172957	0.1	0.0219488	0.00552665	0.933
4A	161	1	143.712		1.09	6	2.04114	2.17013	1.49508	2.12066	3.3	0.27303	0.402019	0.913		161	1	143.712		2.95	7	5.30467	3.95942	6.49088	11.1966	8.5	-0.593104	-1.93836	0.913		161	1	143.712		0.05	4	0.471567	0.459641	0.428433	0.172956	0.1	0.021567	0.00964135	0.913
4A	162	1	144.712		1.01	7	2.04351	2.16455	1.50263	2.12305	3.2	0.270438	0.39148	0.9		162	1	144.712		2.86	7	5.26652	3.97972	6.52123	11.2003	8.5	-0.627355	-1.91416	0.9		162	1	144.712		0.06	4	0.468988	0.461963	0.426959	0.172948	0.1	0.0210145	0.0139892	0.9
4A	163	1	145.712		0.92	7	2.04684	2.15579	1.51613	2.12716	3	0.265352	0.374305	0.897		163	1	145.712		2.74	7	5.2106	4.01581	6.53054	11.2338	8.2	-0.659967	-1.85476	0.897		163	1	145.712		0.06	5	0.466192	0.464297	0.425556	0.172932	0.2	0.020318	0.0184226	0.897
4A	164	1	146.712		0.81	7	2.05105	2.14334	1.53707	2.13319	2.7	0.25699	0.349281	0.901		164	1	146.712		2.58	7	5.13609	4.06833	6.51858	11.2951	7.7	-0.691247	-1.75901	0.901		164	1	146.712		0.06	5	0.4633	0.466546	0.424262	0.172907	0.2	0.0195191	0.0227644	0.901
4A	165	1	147.712		0.7	7	2.05593	2.12639	1.56785	2.14138	2.3	0.244037	0.314501	0.914		165	1	147.712		2.4	7	5.04526	4.1362	6.48532	11.3783	7	-0.72003	-1.62909	0.914		165	1	147.712		0.07	5	0.46044	0.468617	0.42311	0.172875	0.2	0.0186651	0.026842	0.914
4A	166	1	148.712		0.58	7	2.06104	2.10414	1.61102	2.15167	1.9	0.225011	0.268109	0.935		166	1	148.712		2.21	6	4.9446	4.21603	6.43098	11.475	6.2	-0.743187	-1.47176	0.935		166	1	148.712		0.08	5	0.457725	0.470438	0.422125	0.17284	0.2	0.0178	0.0305127	0.935
4A	167	1	149.712		0.46	6	2.06573	2.07759	1.66504	2.16273	1.4	0.200345	0.212205	0.964		167	1	149.712		2.03	6	4.84373	4.30267	6.35677	11.5766	5.4	-0.75652	-1.29757	0.964		167	1	149.712		0.09	4	0.455238	0.471962	0.421322	0.172804	0.2	0.0169576	0.0336816	0.964
4A	168	1	150.663	SNP_2253713	0.36	4	2.06915	2.05236	1.7178	2.17166	0.9	0.175672	0.158883	1		168	1	150.663	SNP_2253713	1.86	4	4.75563	4.38667	6.27049	11.6714	4.6	-0.757431	-1.12639	1		168	1	150.663	SNP_2253713	0.1	4	0.453125	0.473118	0.420732	0.172773	0.2	0.0161966	0.0361899	1
4A	169	1	150.944	SNP_1287183	0.46	4	2.06915	2.07	1.68881	2.16607	1.2	0.19017	0.191021	1		169	1	150.944	SNP_1287183	1.61	4	4.75563	4.41728	6.15857	11.7459	4	-0.701473	-1.03982	1		169	1	150.944	SNP_1287183	0.13	4	0.453125	0.475543	0.416667	0.172653	0.3	0.0182292	0.0406476	1
4A	170	1	150.944	SNP_1078379	0.46	4	2.06915	2.07	1.68881	2.16607	1.2	0.19017	0.191021	1		170	1	150.944	SNP_1078379	1.61	4	4.75563	4.41728	6.15857	11.7459	4	-0.701473	-1.03982	1		170	1	150.944	SNP_1078379	0.13	4	0.453125	0.475543	0.416667	0.172653	0.3	0.0182292	0.0406476	1
4A	171	1	151.444	SNP_3574299	1.01	4	2.06915	2.13363	1.55548	2.13572	2.6	0.256836	0.321317	1		171	1	151.444	SNP_3574299	1.54	4	4.75503	4.42904	6.13357	11.7659	3.8	-0.689274	-1.01526	1		171	1	151.444	SNP_3574299	0.09	4	0.453166	0.472803	0.422619	0.172803	0.2	0.0152735	0.0349102	1

## Sheet: C5
Chromosme	48hai	Intervall (0.95)	2.6													72hai	Intervall (0.95)	2.8													Macro	Intervall (0.95)	2.8
	Nr	Group	Position	Locus	LOD	# Iter.	mu_A	mu_H	mu_B	Variance	% Expl.	Additive	Dominance	GIC		Nr	Group	Position	Locus	LOD	# Iter.	mu_A	mu_H	mu_B	Variance	% Expl.	Additive	Dominance	GIC		Nr	Group	Position	Locus	LOD	# Iter.	mu_A	mu_H	mu_B	Variance	% Expl.	Additive	Dominance	GIC
5A	1	5	0	SNP_1769209	0.09	4	1.84354	2.01398	2.02104	2.18728	0.2	-0.088751	0.081686	1		1	5	0	SNP_1769209	0.81	4	4.80235	4.52869	5.70914	11.9865	2	-0.453393	-0.727062	1		1	5	0	SNP_1769209	0.2	4	0.438933	0.437578	0.505007	0.172321	0.5	-0.0330371	-0.0343919	1
5A	2	5	1		0.06	4	1.8666	2.00303	2.02074	2.18891	0.2	-0.0770674	0.0593568	0.977		2	5	1		0.89	4	4.74617	4.53254	5.77385	11.9572	2.3	-0.513836	-0.72747	0.977		2	5	1		0.22	5	0.414839	0.449154	0.502921	0.172227	0.6	-0.0440411	-0.00972588	0.977
5A	3	5	2		0.04	4	1.89372	1.9914	2.02026	2.19031	0.1	-0.0632706	0.0344059	0.997		3	5	2		0.94	4	4.68208	4.55221	5.79937	11.9477	2.3	-0.558646	-0.688519	0.997		3	5	2		0.29	4	0.39567	0.457899	0.500216	0.171926	0.7	-0.0522726	0.00995645	0.997
5A	4	5	2.074	SNP_1094933	0.03	4	1.89583	1.99054	2.02021	2.19039	0.1	-0.0621875	0.0325168	1		4	5	2.074	SNP_1094933	0.94	4	4.67711	4.55417	5.79979	11.9477	2.3	-0.561343	-0.684282	1		4	5	2.074	SNP_1094933	0.3	4	0.394737	0.458333	0.5	0.171908	0.7	-0.0526316	0.0109649	1
5A	5	5	3.074		0.02	4	1.91377	1.99245	1.99966	2.1913	0	-0.0429465	0.0357349	0.985		5	5	3.074		0.73	4	4.65729	4.60818	5.69696	12.008	1.9	-0.519834	-0.568947	0.985		5	5	3.074		0.28	4	0.39281	0.459145	0.496606	0.171969	0.7	-0.0518979	0.0144362	0.985
5A	6	5	3.561	SNP_3574487	0.01	4	1.92545	1.99263	1.9898	2.19166	0	-0.0321707	0.0350063	1		6	5	3.561	SNP_3574487	0.63	4	4.646	4.64092	5.63061	12.0425	1.6	-0.492306	-0.497388	1		6	5	3.561	SNP_3574487	0.27	4	0.392857	0.459184	0.494898	0.172026	0.7	-0.0510204	0.0153061	1
5A	7	5	4.561		0.02	4	1.90392	1.99921	1.99188	2.19101	0.1	-0.0439768	0.0513094	0.957		7	5	4.561		0.62	5	4.61588	4.64488	5.65133	12.0331	1.6	-0.517723	-0.48872	0.957		7	5	4.561		0.33	5	0.383028	0.460271	0.500284	0.171643	0.9	-0.0586277	0.0186152	0.957
5A	8	5	5.561		0.04	5	1.88048	2.00659	1.99386	2.19003	0.1	-0.0566898	0.0694235	0.919		8	5	5.561		0.62	5	4.5819	4.65155	5.66961	12.0244	1.7	-0.543852	-0.474211	0.919		8	5	5.561		0.4	6	0.373107	0.461166	0.50627	0.171187	1.2	-0.0665812	0.0214773	0.919
5A	9	5	6.561		0.05	6	1.85535	2.01472	1.99573	2.18866	0.2	-0.0701891	0.0891832	0.885		9	5	6.561		0.61	6	4.54433	4.66101	5.68504	12.0165	1.8	-0.570356	-0.453676	0.885		9	5	6.561		0.48	7	0.363708	0.461628	0.512927	0.170674	1.5	-0.0746095	0.0233101	0.885
5A	10	5	7.561		0.08	6	1.82896	2.02345	1.99749	2.18687	0.2	-0.0842697	0.110227	0.854		10	5	7.561		0.61	6	4.50359	4.67338	5.69711	12.0094	1.8	-0.596762	-0.426967	0.854		10	5	7.561		0.57	7	0.355262	0.461495	0.520302	0.17012	1.8	-0.0825198	0.0237128	0.854
5A	11	5	8.561		0.1	7	1.80184	2.03259	1.99917	2.18464	0.4	-0.0986664	0.132081	0.828		11	5	8.561		0.61	7	4.46057	4.68853	5.70546	12.0033	1.9	-0.622446	-0.394489	0.828		11	5	8.561		0.66	7	0.3479	0.460727	0.52839	0.169531	2.1	-0.0902449	0.0225823	0.828
5A	12	5	9.561		0.13	7	1.77481	2.0418	2.00085	2.18201	0.5	-0.113023	0.153976	0.806		12	5	9.561		0.6	7	4.41609	4.70644	5.70951	11.9981	1.9	-0.646711	-0.356361	0.806		12	5	9.561		0.76	8	0.341562	0.459379	0.537125	0.168909	2.5	-0.0977818	0.0200349	0.806
5A	13	5	10.561		0.16	8	1.74858	2.05082	2.0026	2.17906	0.6	-0.127008	0.175224	0.788		13	5	10.561		0.6	7	4.37125	4.72689	5.70887	11.9941	2	-0.66881	-0.313175	0.788		13	5	10.561		0.86	8	0.336137	0.45756	0.546358	0.168253	2.9	-0.10511	0.0163125	0.788
5A	14	5	11.561		0.2	8	1.724	2.05924	2.00457	2.17594	0.7	-0.140288	0.194961	0.774		14	5	11.561		0.6	8	4.32722	4.74954	5.70334	11.9912	2	-0.688062	-0.265745	0.774		14	5	11.561		0.96	9	0.331501	0.455424	0.555849	0.167568	3.3	-0.112174	0.0117489	0.774
5A	15	5	12.561		0.24	8	1.70158	2.06684	2.00688	2.17278	0.9	-0.152652	0.212611	0.764		15	5	12.561		0.59	8	4.28475	4.77429	5.69247	11.9897	2	-0.703859	-0.214319	0.764		15	5	12.561		1.08	10	0.327554	0.453158	0.565267	0.166868	3.7	-0.118856	0.00674738	0.764
5A	16	5	13.561		0.28	8	1.68166	2.07341	2.00964	2.16972	1	-0.163989	0.227765	0.758		16	5	13.561		0.59	8	4.24476	4.80072	5.67629	11.9895	2	-0.715764	-0.159803	0.758		16	5	13.561		1.19	10	0.32421	0.450948	0.574252	0.166175	4.1	-0.125021	0.00171709	0.758
5A	17	5	14.561		0.32	8	1.66436	2.07887	2.01292	2.16687	1.2	-0.17428	0.240224	0.755		17	5	14.561		0.59	8	4.20796	4.8284	5.65498	11.9905	2	-0.72351	-0.103063	0.755		17	5	14.561		1.3	10	0.3214	0.448941	0.582508	0.165514	4.4	-0.130554	-0.00301287	0.755
5A	18	5	15.561		0.35	8	1.64963	2.08317	2.01678	2.1643	1.3	-0.183576	0.249966	0.757		18	5	15.561		0.59	8	4.17494	4.85682	5.62896	11.9926	2	-0.727008	-0.0451268	0.757		18	5	15.561		1.42	10	0.319064	0.447234	0.589833	0.16491	4.8	-0.135384	-0.00721448	0.757
5A	19	5	16.561		0.39	8	1.63731	2.08637	2.02122	2.16205	1.4	-0.191957	0.2571	0.763		19	5	16.561		0.59	7	4.14619	4.88542	5.59879	11.9956	2	-0.726303	0.0129317	0.763		19	5	16.561		1.53	10	0.31716	0.445868	0.596124	0.164379	5.1	-0.139482	-0.0107744	0.763
5A	20	5	17.561		0.43	8	1.62719	2.08852	2.02622	2.16012	1.5	-0.199515	0.261819	0.772		20	5	17.561		0.59	7	4.12219	4.91337	5.56561	11.9993	1.9	-0.721709	0.0694775	0.772		20	5	17.561		1.64	9	0.31566	0.444842	0.601359	0.163932	5.4	-0.14285	-0.0136666	0.772
5A	21	5	18.561		0.46	7	1.61905	2.08972	2.03172	2.15853	1.5	-0.206334	0.264332	0.785		21	5	18.561		0.58	7	4.10323	4.94008	5.53026	12.0036	1.9	-0.713518	0.123333	0.785		21	5	18.561		1.74	9	0.314558	0.444118	0.605589	0.163573	5.6	-0.145516	-0.0159557	0.785
5A	22	5	19.561		0.5	7	1.61265	2.09011	2.03759	2.15724	1.6	-0.212469	0.264995	0.803		22	5	19.561		0.59	7	4.08954	4.96487	5.49382	12.0085	1.8	-0.702143	0.173187	0.803		22	5	19.561		1.84	8	0.313862	0.443653	0.608868	0.163306	5.7	-0.147503	-0.017712	0.803
5A	23	5	20.561		0.53	7	1.60779	2.08979	2.04374	2.15623	1.6	-0.217973	0.264023	0.824		23	5	20.561		0.59	6	4.0813	4.98715	5.45731	12.014	1.8	-0.688005	0.217837	0.824		23	5	20.561		1.93	8	0.313601	0.443384	0.611288	0.163127	5.8	-0.148844	-0.0190608	0.824
5A	24	5	21.561		0.56	6	1.60431	2.08886	2.05007	2.15548	1.7	-0.222879	0.261667	0.85		24	5	21.561		0.59	6	4.07838	5.00656	5.42156	12.0202	1.8	-0.671592	0.256587	0.85		24	5	21.561		2.01	7	0.313807	0.443256	0.612923	0.163034	5.9	-0.149558	-0.0201089	0.85
5A	25	5	22.561		0.59	6	1.60203	2.08744	2.05643	2.15496	1.7	-0.227199	0.258214	0.879		25	5	22.561		0.59	6	4.08069	5.02283	5.38725	12.0272	1.7	-0.653279	0.288859	0.879		25	5	22.561		2.09	7	0.314525	0.443209	0.613865	0.163025	5.9	-0.14967	-0.0209861	0.879
5A	26	5	23.561		0.61	5	1.60082	2.08563	2.06273	2.15464	1.7	-0.230952	0.253853	0.913		26	5	23.561		0.59	5	4.08796	5.03588	5.35484	12.0352	1.6	-0.633445	0.314478	0.913		26	5	23.561		2.16	6	0.315792	0.443191	0.614186	0.163093	5.8	-0.149197	-0.0217979	0.913
5A	27	5	24.561		0.64	5	1.60057	2.08351	2.06885	2.15451	1.7	-0.234141	0.248798	0.95		27	5	24.561		0.59	5	4.09968	5.04584	5.32458	12.0439	1.6	-0.612449	0.33371	0.95		27	5	24.561		2.22	5	0.317631	0.443159	0.613963	0.163235	5.8	-0.148166	-0.0226375	0.95
5A	28	5	25.561		0.66	4	1.60117	2.08115	2.07472	2.15455	1.7	-0.236777	0.243204	0.992		28	5	25.561		0.58	4	4.11536	5.0529	5.29657	12.0535	1.5	-0.590608	0.346935	0.992		28	5	25.561		2.27	5	0.320036	0.443087	0.613262	0.163442	5.6	-0.146613	-0.0235623	0.992
5A	29	5	25.736	SNP_3574676	0.67	4	1.60135	2.08071	2.07571	2.15457	1.7	-0.237181	0.242181	1		29	5	25.736	SNP_3574676	0.58	4	4.11846	5.05386	5.2919	12.0552	1.5	-0.586722	0.348678	1		29	5	25.736	SNP_3574676	2.28	4	0.320513	0.443069	0.613095	0.163484	5.6	-0.146291	-0.0237347	1
5A	30	5	26.736		0.61	5	1.60834	2.08775	2.06302	2.1548	1.7	-0.227341	0.252072	0.964		30	5	26.736		0.66	5	4.06266	5.08661	5.2897	12.0257	1.7	-0.613524	0.410426	0.964		30	5	26.736		2.4	5	0.312151	0.44505	0.617417	0.1625	6.2	-0.152633	-0.0197338	0.964
5A	31	5	27.736		0.54	6	1.62357	2.09288	2.0478	2.15658	1.6	-0.212115	0.257196	0.946		31	5	27.736		0.71	5	4.03715	5.10812	5.2915	12.0062	1.9	-0.627175	0.443791	0.946		31	5	27.736		2.47	6	0.307348	0.446873	0.618858	0.161872	6.5	-0.155755	-0.0162305	0.946
5A	32	5	28.736		0.46	6	1.65172	2.09349	2.03177	2.16072	1.4	-0.190028	0.251743	0.947		32	5	28.736		0.75	5	4.03436	5.11973	5.29691	11.9963	1.9	-0.631274	0.454097	0.947		32	5	28.736		2.47	6	0.306219	0.448779	0.616815	0.161719	6.6	-0.155298	-0.0127378	0.947
5A	33	5	29.736		0.36	6	1.70104	2.08489	2.01656	2.16835	1.1	-0.157762	0.226093	0.966		33	5	29.736		0.77	4	4.0484	5.12241	5.3058	11.9944	2	-0.6287	0.445309	0.966		33	5	29.736		2.39	6	0.309262	0.451618	0.609351	0.162268	6.3	-0.150045	-0.0076884	0.966
5A	34	5	30.636	SNP_1093315	0.27	4	1.76297	2.06819	2.00363	2.17705	0.7	-0.120333	0.184894	1		34	5	30.636	SNP_1093315	0.77	4	4.07205	5.11785	5.31643	11.9983	1.9	-0.622193	0.423607	1		34	5	30.636	SNP_1093315	2.24	4	0.316712	0.456511	0.594419	0.163668	5.5	-0.138854	0.000945103	1
5A	35	5	31.636		0.29	6	1.74408	2.0802	1.99991	2.1738	0.8	-0.127912	0.208206	0.954		35	5	31.636		0.75	4	4.08278	5.09893	5.35826	11.9958	2	-0.637737	0.378412	0.954		35	5	31.636		2.29	6	0.317856	0.450817	0.606649	0.162817	6	-0.144397	-0.0114351	0.954
5A	36	5	32.636		0.3	7	1.72786	2.09141	1.99571	2.1706	1	-0.133924	0.229625	0.915		36	5	32.636		0.74	5	4.09694	5.07608	5.40362	11.9934	2	-0.653343	0.325795	0.915		36	5	32.636		2.34	8	0.319433	0.445368	0.617963	0.161977	6.5	-0.149265	-0.0233296	0.915
5A	37	5	33.636		0.31	7	1.71613	2.10069	1.99152	2.16793	1.1	-0.137697	0.246862	0.885		37	5	33.636		0.73	5	4.11447	5.0499	5.45124	11.991	2	-0.668382	0.267045	0.885		37	5	33.636		2.38	9	0.321384	0.440682	0.627391	0.161256	6.9	-0.153004	-0.0337049	0.885
5A	38	5	34.636		0.31	8	1.70971	2.10727	1.98788	2.16612	1.2	-0.139083	0.258469	0.861		38	5	34.636		0.72	6	4.13521	5.02135	5.49928	11.9883	2	-0.682032	0.204103	0.861		38	5	34.636		2.4	9	0.323648	0.436933	0.634579	0.160714	7.2	-0.155465	-0.0421806	0.861
5A	39	5	35.636		0.31	8	1.70883	2.11065	1.98534	2.16541	1.2	-0.138251	0.263569	0.846		39	5	35.636		0.72	6	4.15882	4.99178	5.54532	11.9857	2	-0.693248	0.139712	0.846		39	5	35.636		2.39	9	0.326177	0.434115	0.639492	0.160381	7.4	-0.156657	-0.0487195	0.846
5A	40	5	36.636		0.29	9	1.71326	2.11068	1.98424	2.16585	1.2	-0.135493	0.261929	0.838		40	5	36.636		0.72	7	4.18484	4.96259	5.58697	11.9835	2.1	-0.701064	0.076692	0.838		40	5	36.636		2.36	10	0.328928	0.43221	0.642137	0.160271	7.5	-0.156605	-0.0533222	0.838
5A	41	5	37.636		0.27	9	1.72294	2.10714	1.98484	2.16743	1.1	-0.130948	0.253253	0.837		41	5	37.636		0.71	7	4.21263	4.93533	5.62175	11.9825	2.1	-0.704558	0.0181404	0.837		41	5	37.636		2.31	10	0.331856	0.431271	0.642415	0.160401	7.4	-0.15528	-0.0558653	0.837
5A	42	5	38.636		0.25	9	1.73779	2.10004	1.98706	2.17006	1	-0.124634	0.237612	0.844		42	5	38.636		0.71	7	4.24159	4.9112	5.64793	11.9836	2.1	-0.703172	-0.0335551	0.844		42	5	38.636		2.23	10	0.334924	0.431431	0.640112	0.160792	7.2	-0.152594	-0.0560869	0.844
5A	43	5	39.636		0.22	8	1.75761	2.08954	1.99062	2.1735	0.9	-0.116503	0.215427	0.858		43	5	39.636		0.71	6	4.27106	4.89111	5.66438	11.9875	2	-0.696657	-0.0766044	0.858		43	5	39.636		2.12	10	0.338096	0.432957	0.634809	0.161476	6.8	-0.148357	-0.0534951	0.858
5A	44	5	40.636		0.18	8	1.78141	2.07639	1.99491	2.17732	0.7	-0.10675	0.188237	0.88		44	5	40.636		0.7	6	4.30059	4.87541	5.67099	11.9943	2	-0.685203	-0.110379	0.88		44	5	40.636		1.98	10	0.341353	0.436263	0.625844	0.162488	6.2	-0.142246	-0.0473356	0.88
5A	45	5	41.636		0.15	7	1.80729	2.06183	1.99925	2.18102	0.5	-0.0959823	0.158559	0.909		45	5	41.636		0.69	6	4.32974	4.86418	5.66816	12.004	1.9	-0.669208	-0.134771	0.909		45	5	41.636		1.83	9	0.344717	0.441734	0.612598	0.163819	5.4	-0.133941	-0.0369235	0.909
5A	46	5	42.636		0.12	6	1.83271	2.04745	2.00304	2.18415	0.4	-0.0851659	0.129574	0.946		46	5	42.636		0.67	5	4.35826	4.85708	5.65693	12.0164	1.8	-0.649337	-0.150519	0.946		46	5	42.636		1.66	7	0.348281	0.448935	0.595854	0.165299	4.6	-0.123786	-0.0231327	0.946
5A	47	5	43.636		0.1	4	1.85575	2.03446	2.00597	2.18653	0.3	-0.0751125	0.103595	0.991		47	5	43.636		0.66	4	4.38598	4.85352	5.63878	12.0307	1.7	-0.626398	-0.158863	0.991		47	5	43.636		1.51	5	0.352161	0.456148	0.578661	0.166628	3.8	-0.11325	-0.00926345	0.991
5A	48	5	43.827	SNP_3575099	0.1	4	1.85979	2.03218	2.00643	2.18691	0.2	-0.0733185	0.0990738	1		48	5	43.827	SNP_3575099	0.65	4	4.39118	4.85318	5.63465	12.0336	1.6	-0.621737	-0.159732	1		48	5	43.827	SNP_3575099	1.48	4	0.352941	0.457386	0.575581	0.16685	3.7	-0.11132	-0.00687492	1
5A	49	5	44.626	SNP_1207647	0.14	4	1.84404	1.99563	2.09419	2.18414	0.4	-0.125072	0.0265179	1		49	5	44.626	SNP_1207647	1.55	4	4.4516	4.5617	6.12068	11.7639	3.8	-0.834541	-0.724436	1		49	5	44.626	SNP_1207647	1.36	4	0.355	0.457386	0.568182	0.167359	3.4	-0.106591	-0.00420455	1
5A	50	5	45.626		0.19	5	1.80821	2.01015	2.10504	2.18023	0.6	-0.148417	0.053523	0.946		50	5	45.626		1.4	5	4.41049	4.60513	6.0786	11.7902	3.6	-0.834054	-0.639407	0.946		50	5	45.626		1.54	6	0.349156	0.45425	0.582156	0.16621	4	-0.1165	-0.0114057	0.946
5A	51	5	46.626		0.25	7	1.76921	2.02724	2.11461	2.17495	0.8	-0.172702	0.0853281	0.905		51	5	46.626		1.25	5	4.36618	4.65989	6.02011	11.8236	3.4	-0.826962	-0.533258	0.905		51	5	46.626		1.71	7	0.34398	0.451889	0.594052	0.165122	4.7	-0.125036	-0.0171265	0.905
5A	52	5	47.626		0.32	7	1.73323	2.04362	2.12303	2.16901	1.1	-0.194897	0.115487	0.877		52	5	47.626		1.1	6	4.32167	4.72408	5.94538	11.8611	3.1	-0.811855	-0.409452	0.877		52	5	47.626		1.87	7	0.339483	0.450721	0.602905	0.164208	5.2	-0.131711	-0.0204733	0.877
5A	53	5	48.626		0.39	8	1.70556	2.05643	2.13056	2.16358	1.3	-0.2125	0.138361	0.863		53	5	48.626		0.98	6	4.28122	4.79443	5.85602	11.8996	2.7	-0.787399	-0.274185	0.863		53	5	48.626		2.02	7	0.335703	0.450621	0.608745	0.163509	5.6	-0.136521	-0.0216027	0.863
5A	54	5	49.626		0.46	7	1.68771	2.06475	2.13737	2.15947	1.5	-0.22483	0.15221	0.862		54	5	49.626		0.87	6	4.24954	4.86648	5.75562	11.9361	2.4	-0.753041	-0.136098	0.862		54	5	49.626		2.14	7	0.332687	0.451308	0.611945	0.163023	5.9	-0.139629	-0.0210085	0.862
5A	55	5	50.626		0.51	7	1.6787	2.06898	2.1434	2.15693	1.6	-0.232351	0.157936	0.875		55	5	50.626		0.78	6	4.23062	4.93527	5.64963	11.969	2.2	-0.709506	-0.00484788	0.875		55	5	50.626		2.24	7	0.330474	0.452527	0.612908	0.162736	6	-0.141217	-0.019164	0.875
5A	56	5	51.626		0.55	6	1.67727	2.06968	2.14861	2.15591	1.7	-0.235673	0.156734	0.9		56	5	51.626		0.71	5	4.22699	4.99618	5.54424	11.998	1.9	-0.658623	0.110562	0.9		56	5	51.626		2.32	6	0.329072	0.454081	0.612013	0.162626	6.1	-0.14147	-0.016462	0.9
5A	57	5	52.626		0.59	5	1.68212	2.06737	2.15297	2.15622	1.6	-0.235423	0.149823	0.94		57	5	52.626		0.65	5	4.23947	5.0458	5.44484	12.0245	1.7	-0.602681	0.20364	0.94		57	5	52.626		2.39	5	0.32847	0.455813	0.609622	0.162668	6.1	-0.140576	-0.0132322	0.94
5A	58	5	53.626		0.61	4	1.69196	2.06259	2.15644	2.15758	1.6	-0.232237	0.138389	0.992		58	5	53.626		0.6	4	4.2673	5.08238	5.35495	12.0498	1.5	-0.543825	0.271261	0.992		58	5	53.626		2.43	4	0.328633	0.4576	0.606076	0.162837	6	-0.138722	-0.00975474	0.992
5A	59	5	53.754	SNP_1201414	0.61	4	1.69351	2.06183	2.15682	2.15781	1.6	-0.231652	0.136664	1		59	5	53.754	SNP_1201414	0.59	4	4.27186	5.08611	5.34422	12.0531	1.5	-0.536181	0.278073	1		59	5	53.754	SNP_1201414	2.43	4	0.328706	0.457827	0.605556	0.162866	6	-0.138425	-0.00930436	1
5A	60	5	54.754		0.61	4	1.71193	2.02061	2.22236	2.15769	1.6	-0.255212	0.053464	0.985		60	5	54.754		0.73	4	4.17446	5.24357	5.13975	12.011	1.8	-0.482644	0.58646	0.985		60	5	54.754		1.75	6	0.329345	0.481881	0.565445	0.165501	4.4	-0.11805	0.0344864	0.985
5A	61	5	54.91	SNP_3574156	0.61	4	1.7158	2.01483	2.2315	2.15772	1.6	-0.25785	0.0411776	1		61	5	54.91	SNP_3574156	0.76	4	4.16264	5.2636	5.106	12.0024	1.9	-0.471679	0.629275	1		61	5	54.91	SNP_3574156	1.65	4	0.330189	0.488764	0.55	0.166129	4.1	-0.109906	0.0486697	1
5A	62	5	55.87	SNP_1227990	0.28	4	1.79761	1.99467	2.15744	2.17664	0.7	-0.179914	0.0171516	1		62	5	55.87	SNP_1227990	1.05	4	4.03	5.08915	5.57615	11.9145	2.6	-0.773077	0.286072	1		62	5	55.87	SNP_1227990	1.65	4	0.326531	0.481383	0.557692	0.166144	4.1	-0.115581	0.0392715	1
5A	63	5	56.322	SNP_1026430	0.5	4	1.72283	2.0167	2.20324	2.16401	1.3	-0.240209	0.0536675	1		63	5	56.322	SNP_1026430	0.91	4	4.14898	4.99948	5.67757	11.9547	2.3	-0.764294	0.0862056	1		63	5	56.322	SNP_1026430	1.37	4	0.341837	0.473958	0.560811	0.167293	3.4	-0.109487	0.0226346	1
5A	64	5	56.839	SNP_1052648	0.52	4	1.71896	2.02802	2.19158	2.16306	1.3	-0.23631	0.0727533	1		64	5	56.839	SNP_1052648	1.17	4	4.05216	5.04215	5.73	11.8791	2.9	-0.838922	0.151072	1		64	5	56.839	SNP_1052648	1.92	4	0.328431	0.473118	0.585526	0.164992	4.7	-0.128547	0.0161394	1
5A	65	5	57.109	SNP_3575315	0.47	4	1.71745	2.04413	2.14632	2.16595	1.2	-0.214434	0.112249	1		65	5	57.109	SNP_3575315	0.91	4	4.1026	5.0817	5.53974	11.9575	2.3	-0.718568	0.260534	1		65	5	57.109	SNP_3575315	1.85	4	0.335	0.465426	0.592105	0.165269	4.6	-0.128553	0.0018729	1
5A	66	5	57.379	SNP_3574123	0.44	4	1.72604	2.04978	2.13053	2.16747	1.1	-0.202242	0.121496	1		66	5	57.379	SNP_3574123	1.05	4	4.03922	5.12452	5.54579	11.9143	2.6	-0.753287	0.332014	1		66	5	57.379	SNP_3574123	1.85	4	0.328431	0.475806	0.578947	0.165288	4.6	-0.125258	0.0221171	1
5A	67	5	57.769	SNP_1060942	0.39	4	1.73957	2.02835	2.1435	2.17006	1	-0.201967	0.086819	1		67	5	57.769	SNP_1060942	0.95	4	4.04286	5.13097	5.451	11.9429	2.4	-0.704071	0.384039	1		67	5	57.769	SNP_1060942	1.79	4	0.331633	0.467742	0.58125	0.165523	4.4	-0.124809	0.0113006	1
5A	68	5	58.59	SNP_3574246	0.75	4	1.63674	2.04155	2.21432	2.15015	1.9	-0.28879	0.116012	1		68	5	58.59	SNP_3574246	0.99	4	4.00152	5.10101	5.52027	11.9305	2.5	-0.759374	0.340114	1		68	5	58.59	SNP_3574246	2.33	4	0.304348	0.474747	0.594595	0.163296	5.7	-0.145123	0.0252763	1
5A	69	5	59.296	SNP_3574228	1.11	4	1.77848	1.8837	2.44179	2.12997	2.8	-0.331658	-0.226441	1		69	5	59.296	SNP_3574228	1.24	4	3.89469	5.27085	5.30821	11.8559	3.1	-0.706756	0.669402	1		69	5	59.296	SNP_3574228	2.24	4	0.321429	0.465426	0.602564	0.163681	5.5	-0.140568	0.00342919	1
5A	70	5	60.296		0.97	6	1.75006	1.90153	2.43633	2.12978	2.9	-0.343136	-0.191663	0.959		70	5	60.296		1.24	5	3.91081	5.14493	5.60326	11.8348	3.3	-0.846227	0.38789	0.959		70	5	60.296		2.51	5	0.317625	0.461426	0.619962	0.162336	6.3	-0.151168	-0.00736796	0.959
5A	71	5	61.077	SNP_3574189	0.7	4	1.73217	1.96656	2.30974	2.15293	1.8	-0.288781	-0.0543962	1		71	5	61.077	SNP_3574189	1.26	4	4.02306	5.00611	5.80553	11.8506	3.1	-0.891233	0.0918115	1		71	5	61.077	SNP_3574189	2.65	4	0.316327	0.460526	0.625	0.161979	6.5	-0.154337	-0.0101369	1
5A	72	5	61.642	SNP_1089360	0.54	4	1.72638	2.0036	2.21659	2.16201	1.4	-0.245101	0.0321113	1		72	5	61.642	SNP_1089360	1.71	4	3.8738	5.03692	5.88463	11.7176	4.2	-1.00542	0.157706	1		72	5	61.642	SNP_1089360	2.78	4	0.3	0.475275	0.603659	0.161422	6.8	-0.151829	0.0234455	1
5A	73	5	62.642		0.75	8	1.72737	1.93194	2.36469	2.14002	2.4	-0.31866	-0.114084	0.961		73	5	62.642		1.95	5	3.72964	5.09427	5.9119	11.6165	5.1	-1.09113	0.273499	0.961		73	5	62.642		3.26	7	0.26457	0.489896	0.60682	0.157766	8.9	-0.171125	0.054201	0.961
5A	74	5	63.642		1.06	8	1.73519	1.87743	2.47268	2.11513	3.5	-0.368748	-0.226505	0.941		74	5	63.642		2.18	6	3.61539	5.13804	5.92789	11.5317	5.7	-1.15625	0.3664	0.941		74	5	63.642		3.58	7	0.248999	0.495125	0.608661	0.156027	9.9	-0.179831	0.0662952	0.941
5A	75	5	64.642		1.32	7	1.74608	1.85325	2.51779	2.10358	4	-0.385858	-0.278681	0.941		75	5	64.642		2.39	5	3.53291	5.16751	5.93344	11.4715	6.2	-1.20027	0.434336	0.941		75	5	64.642		3.75	7	0.24204	0.496627	0.609256	0.155365	10.3	-0.183608	0.0709795	0.941
5A	76	5	65.642		1.52	6	1.75877	1.84059	2.5377	2.09908	4.3	-0.389463	-0.307643	0.96		76	5	65.642		2.56	5	3.47704	5.18473	5.92917	11.4367	6.5	-1.22607	0.481623	0.96		76	5	65.642		3.76	7	0.240782	0.495877	0.608514	0.1555	10.2	-0.183866	0.0712283	0.96
5A	77	5	66.642		1.68	4	1.7722	1.83374	2.54398	2.09858	4.3	-0.385893	-0.324348	0.999		77	5	66.642		2.7	4	3.44345	5.19102	5.91573	11.4268	6.6	-1.23614	0.511427	0.999		77	5	66.642		3.47	5	0.264558	0.485118	0.606335	0.158532	8.5	-0.170888	0.049672	0.999
5A	78	5	66.669	SNP_3574343	1.68	4	1.77256	1.83362	2.544	2.09861	4.3	-0.385721	-0.324662	1		78	5	66.669	SNP_3574343	2.7	4	3.44283	5.19104	5.91525	11.4268	6.6	-1.23621	0.512004	1		78	5	66.669	SNP_3574343	3.45	4	0.266304	0.484375	0.60625	0.158724	8.4	-0.169973	0.0480978	1
5A	79	5	67.669		1.55	5	1.75995	1.84594	2.51232	2.10427	4	-0.376188	-0.290194	0.965		79	5	67.669		2.51	6	3.47187	5.26366	5.81523	11.4279	6.6	-1.17168	0.620114	0.965		79	5	67.669		3.42	5	0.271932	0.489809	0.60024	0.158678	8.4	-0.164154	0.0537231	0.965
5A	80	5	68.425	SNP_981730	1.43	4	1.75367	1.86024	2.47186	2.11249	3.6	-0.359093	-0.252532	1		80	5	68.425	SNP_981730	2.11	4	3.68462	5.2377	5.72186	11.5986	5.2	-1.01862	0.534463	1		80	5	68.425	SNP_981730	3.36	4	0.278846	0.494253	0.593023	0.159103	8.1	-0.157089	0.0583182	1
5A	81	5	69.425		1.4	5	1.74473	1.86284	2.46489	2.11227	3.7	-0.36008	-0.24197	0.962		81	5	69.425		2.17	5	3.64828	5.22255	5.76748	11.5578	5.5	-1.0596	0.514664	0.962		81	5	69.425		4.24	7	0.248234	0.491372	0.625728	0.153453	11.4	-0.188747	0.0543911	0.962
5A	82	5	70.425		1.36	5	1.73523	1.86843	2.4511	2.1137	3.6	-0.357936	-0.224735	0.94		82	5	70.425		2.2	5	3.635	5.19519	5.80878	11.5353	5.7	-1.08689	0.473302	0.94		82	5	70.425		4.92	8	0.239246	0.482273	0.647517	0.150536	13.1	-0.204135	0.0388914	0.94
5A	83	5	71.425		1.3	5	1.72553	1.87705	2.43069	2.11669	3.5	-0.352578	-0.201054	0.936		83	5	71.425		2.19	5	3.64452	5.15676	5.84303	11.532	5.7	-1.09926	0.412979	0.936		83	5	71.425		5.46	7	0.234572	0.477235	0.657392	0.148879	14	-0.21141	0.0312533	0.936
5A	84	5	72.425		1.23	5	1.71598	1.88882	2.40416	2.12104	3.3	-0.34409	-0.171249	0.949		84	5	72.425		2.14	5	3.68069	5.10656	5.86792	11.5506	5.6	-1.09361	0.332254	0.949		84	5	72.425		5.89	6	0.231932	0.474442	0.661015	0.147953	14.6	-0.214542	0.0279683	0.949
5A	85	5	73.425		1.16	4	1.70679	1.90383	2.37244	2.12639	3	-0.332826	-0.135788	0.978		85	5	73.425		2.06	5	3.75119	5.04213	5.8812	11.5948	5.2	-1.06501	0.225935	0.978		85	5	73.425		6.23	5	0.230638	0.472792	0.661009	0.147494	14.8	-0.215185	0.0269689	0.978
5A	86	5	73.939	SNP_1061058	1.12	4	1.70224	1.91282	2.3546	2.12935	2.9	-0.326178	-0.115602	1		86	5	73.939	SNP_1061058	2.01	4	3.80216	5.00346	5.8826	11.627	5	-1.04022	0.161078	1		86	5	73.939	SNP_1061058	6.38	4	0.230392	0.472222	0.66	0.147392	14.9	-0.214804	0.0270261	1
5A	87	5	74.939		1.02	5	1.70808	1.9154	2.34924	2.13226	2.7	-0.32058	-0.113253	0.957		87	5	74.939		2.21	5	3.73822	4.97969	5.98913	11.5388	5.7	-1.12545	0.116016	0.957		87	5	74.939		6.62	6	0.226921	0.467994	0.673015	0.145908	15.8	-0.223047	0.0180264	0.957
5A	88	5	75.939		0.91	6	1.7148	1.91945	2.34026	2.13601	2.6	-0.312726	-0.108076	0.923		88	5	75.939		2.41	6	3.68265	4.94957	6.1034	11.4466	6.4	-1.21037	0.0565416	0.923		88	5	75.939		6.88	7	0.223682	0.463613	0.686543	0.144374	16.6	-0.231431	0.00850092	0.923
5A	89	5	76.939		0.79	7	1.72238	1.92552	2.32657	2.14073	2.4	-0.302094	-0.098961	0.896		89	5	76.939		2.62	6	3.63656	4.91505	6.22209	11.3525	7.2	-1.29277	-0.014272	0.896		89	5	76.939		7.14	7	0.220658	0.459271	0.700213	0.14282	17.5	-0.239777	-0.00116466	0.896
5A	90	5	77.939		0.67	7	1.73075	1.93438	2.30661	2.14652	2.1	-0.287931	-0.0842999	0.877		90	5	77.939		2.84	7	3.60005	4.87904	6.34018	11.2603	8	-1.37007	-0.0910813	0.877		90	5	77.939		7.41	8	0.217843	0.455153	0.713556	0.141298	18.4	-0.247857	-0.0105464	0.877
5A	91	5	78.939		0.56	8	1.73981	1.94705	2.27819	2.15344	1.8	-0.26919	-0.0619505	0.865		91	5	78.939		3.06	7	3.57268	4.8444	6.45178	11.1745	8.7	-1.43955	-0.167826	0.865		91	5	78.939		7.67	9	0.215231	0.451433	0.726034	0.139876	19.2	-0.255402	-0.0191991	0.865
5A	92	5	79.939		0.44	9	1.74951	1.96473	2.23852	2.16129	1.4	-0.244502	-0.0292874	0.861		92	5	79.939		3.28	7	3.55386	4.81311	6.55186	11.1	9.3	-1.499	-0.239751	0.861		92	5	79.939		7.92	9	0.212825	0.448269	0.737094	0.138637	20	-0.262134	-0.0266901	0.861
5A	93	5	80.939		0.34	9	1.7599	1.98767	2.18579	2.16924	1.1	-0.212943	0.0148262	0.865		93	5	80.939		3.48	7	3.54307	4.78604	6.63704	11.0405	9.8	-1.54699	-0.304015	0.865		93	5	80.939		8.16	9	0.210633	0.445791	0.746233	0.137661	20.5	-0.2678	-0.0326423	0.865
5A	94	5	81.939		0.26	8	1.77143	2.01286	2.12401	2.17569	0.8	-0.176288	0.0651449	0.877		94	5	81.939		3.67	7	3.53983	4.76329	6.70568	10.9982	10.1	-1.58293	-0.359467	0.877		94	5	81.939		8.37	9	0.208668	0.444087	0.753065	0.137022	20.9	-0.272199	-0.0367795	0.877
5A	95	5	82.939		0.2	5	1.78476	2.03444	2.0636	2.17965	0.6	-0.139419	0.110258	0.896		95	5	82.939		3.84	6	3.54368	4.7446	6.75737	10.974	10.3	-1.60684	-0.405924	0.896		95	5	82.939		8.56	8	0.206947	0.443187	0.757383	0.136765	21	-0.275218	-0.0389781	0.896
5A	96	5	83.939		0.17	6	1.80017	2.04923	2.01179	2.18168	0.5	-0.10581	0.143258	0.923		96	5	83.939		3.98	6	3.55413	4.72962	6.79242	10.9678	10.4	-1.61914	-0.443659	0.923		96	5	83.939		8.71	7	0.20549	0.443037	0.759193	0.136905	21	-0.276852	-0.0393041	0.923
5A	97	5	84.939		0.16	5	1.8174	2.05774	1.96929	2.18273	0.4	-0.0759435	0.164397	0.958		97	5	84.939		4.09	5	3.57059	4.7181	6.8112	10.9788	10.3	-1.62031	-0.472794	0.958		97	5	84.939		8.83	6	0.204323	0.443518	0.758693	0.137421	20.7	-0.277185	-0.0379899	0.958
5A	98	5	85.925	SNP_3574990	0.16	4	1.83571	2.06158	1.93475	2.18336	0.4	-0.0495179	0.176347	1		98	5	85.925	SNP_3574990	4.18	4	3.59209	4.71	6.81425	11.0056	10	-1.61108	-0.493172	1		98	5	85.925	SNP_3574990	8.91	4	0.203488	0.444444	0.75625	0.138255	20.2	-0.276381	-0.0354247	1
5A	99	5	86.925		0.1	4	1.86377	2.04796	1.93551	2.18622	0.3	-0.0358708	0.148323	0.975		99	5	86.925		4.04	5	3.56383	4.73717	6.77542	11.0305	9.8	-1.60579	-0.432454	0.975		99	5	86.925		9.13	5	0.205307	0.439746	0.768855	0.137047	20.9	-0.281774	-0.0473346	0.975
5A	100	5	87.925		0.06	4	1.90058	2.0305	1.93733	2.18907	0.1	-0.0183726	0.111545	0.996		100	5	87.925		3.81	4	3.56259	4.76195	6.69089	11.1064	9.2	-1.56415	-0.364786	0.996		100	5	87.925		9.18	5	0.208046	0.435387	0.76904	0.137251	20.8	-0.280497	-0.0531564	0.996
5A	101	5	88.003	SNP_3028137	0.05	4	1.90366	2.02906	1.9375	2.18927	0.1	-0.0169207	0.108483	1		101	5	88.003	SNP_3028137	3.79	4	3.56381	4.7641	6.68075	11.1156	9.1	-1.55847	-0.35818	1		101	5	88.003	SNP_3028137	9.18	4	0.208333	0.435	0.76875	0.137311	20.7	-0.280208	-0.0535417	1
5A	102	5	89.003		0.08	4	1.86826	2.03443	1.96715	2.18775	0.2	-0.0494461	0.116719	0.966		102	5	89.003		4.15	5	3.51631	4.72677	6.77658	10.9563	10.4	-1.63013	-0.419677	0.966		102	5	89.003		11.07	8	0.207964	0.407739	0.827224	0.125939	27.3	-0.30963	-0.109855	0.966
5A	103	5	90.003		0.12	5	1.83498	2.03774	1.99986	2.18538	0.3	-0.0824384	0.120319	0.949		103	5	90.003		4.43	6	3.47711	4.7094	6.82254	10.847	11.3	-1.67271	-0.440423	0.949		103	5	90.003		11.78	8	0.208317	0.405407	0.831236	0.124396	28.2	-0.31146	-0.11437	0.949
5A	104	5	91.003		0.17	4	1.80439	2.03941	2.03335	2.18216	0.5	-0.114478	0.120547	0.949		104	5	91.003		4.61	6	3.44486	4.70856	6.83304	10.7812	11.9	-1.69409	-0.430389	0.949		104	5	91.003		12.14	7	0.209257	0.405464	0.826687	0.124405	28.2	-0.308715	-0.112508	0.949
5A	105	5	92.003		0.24	4	1.77668	2.04058	2.06454	2.1782	0.6	-0.143928	0.119975	0.965		105	5	92.003		4.69	6	3.41877	4.73051	6.80247	10.7693	12	-1.69185	-0.380109	0.965		105	5	92.003		12.32	6	0.210707	0.406555	0.817772	0.125216	27.7	-0.303532	-0.107684	0.965
5A	106	5	93.003		0.33	4	1.75185	2.04229	2.09122	2.17379	0.8	-0.169683	0.120754	0.997		106	5	93.003		4.57	5	3.39878	4.8204	6.65808	10.8852	11	-1.62965	-0.208038	0.997		106	5	93.003		12.39	5	0.212616	0.408204	0.806406	0.126491	27	-0.296895	-0.101307	0.997
5A	107	5	93.073	SNP_1364455	0.33	4	1.75022	2.04244	2.09289	2.17347	0.9	-0.171336	0.120889	1		107	5	93.073	SNP_1364455	4.56	4	3.39766	4.83222	6.63844	10.9023	10.9	-1.62039	-0.18583	1		107	5	93.073	SNP_1364455	12.39	4	0.212766	0.408333	0.805556	0.126592	26.9	-0.296395	-0.100827	1
5A	108	5	94.073		0.33	5	1.76867	2.00968	2.14069	2.17301	0.9	-0.186009	0.0549965	0.974		108	5	94.073		4.36	5	3.40472	4.86443	6.5685	10.9222	10.7	-1.58189	-0.12218	0.974		108	5	94.073		11.93	6	0.214229	0.411879	0.798553	0.127038	26.7	-0.292162	-0.094512	0.974
5A	109	5	94.702	SNP_994859	0.34	4	1.78061	1.99563	2.155	2.17291	0.9	-0.187194	0.0278189	1		109	5	94.702	SNP_994859	4.06	4	3.4336	4.9269	6.41208	11.0406	9.8	-1.48924	0.0040631	1		109	5	94.702	SNP_994859	11.19	4	0.215	0.419643	0.770833	0.130497	24.7	-0.277917	-0.0732738	1
5A	110	5	95.543	SNP_3575116	0.2	4	1.80813	2.02476	2.07711	2.18097	0.5	-0.134493	0.0821438	1		110	5	95.543	SNP_3575116	4.54	4	3.37776	4.90136	6.58867	10.9058	10.9	-1.60546	-0.0818472	1		110	5	95.543	SNP_3575116	12.31	4	0.209184	0.417614	0.8	0.126833	26.8	-0.295408	-0.0869782	1
5A	111	5	96.373	SNP_1131230	0.1	4	1.86236	2.03145	2.01915	2.18677	0.3	-0.0783946	0.0906949	1		111	5	96.373	SNP_1131230	3.95	4	3.52303	4.87283	6.40595	11.0696	9.5	-1.44146	-0.0916608	1		111	5	96.373	SNP_1131230	7.57	4	0.230766	0.453132	0.694998	0.143015	17.4	-0.232116	-0.00975001	1
5A	112	5	97.373		0.11	5	1.84335	2.03135	2.02867	2.18539	0.3	-0.0926634	0.0953353	0.949		112	5	97.373		3.55	5	3.54637	4.85656	6.38288	11.15	8.9	-1.41825	-0.108071	0.949		112	5	97.373		8.43	7	0.225022	0.429275	0.735644	0.137429	20.7	-0.255311	-0.0510578	0.949
5A	113	5	98.373		0.14	4	1.82494	2.03665	2.02783	2.18396	0.4	-0.101444	0.110267	0.967		113	5	98.373		2.97	5	3.63889	4.84762	6.28071	11.3261	7.4	-1.32091	-0.112177	0.967		113	5	98.373		8.15	7	0.22251	0.431133	0.73138	0.138902	19.8	-0.254435	-0.0458125	0.967
5A	114	5	98.849	SNP_3574423	0.16	4	1.81667	2.04082	2.02383	2.18326	0.4	-0.103582	0.120575	1		114	5	98.849	SNP_3574423	2.65	4	3.70239	4.85517	6.18936	11.4419	6.5	-1.24349	-0.090708	1		114	5	98.849	SNP_3574423	7.56	4	0.222826	0.44382	0.707447	0.143063	17.4	-0.24231	-0.0213162	1
5A	115	5	99.775	SNP_3574258	0.07	4	1.88511	1.98519	2.06	2.18816	0.2	-0.087447	0.0126322	1		115	5	99.775	SNP_3574258	2.68	4	3.63082	4.9533	6.08184	11.4325	6.6	-1.22551	0.0969693	1		115	5	99.775	SNP_3574258	7.37	4	0.223958	0.45	0.693878	0.143753	17	-0.23496	-0.0089181	1
5A	116	5	100.23	SNP_1862185	0.04	4	1.90209	1.99545	2.02065	2.19031	0.1	-0.0592796	0.0340819	1		116	5	100.23	SNP_1862185	3.79	4	3.38364	4.89489	6.3937	11.1149	9.2	-1.50503	0.0062253	1		116	5	100.23	SNP_1862185	7.28	4	0.210227	0.453804	0.695652	0.144083	16.8	-0.242712	0.000864625	1
5A	117	5	100.798	SNP_3575174	0.08	4	1.87953	1.97721	2.0725	2.18755	0.2	-0.0964826	0.00119199	1		117	5	100.798	SNP_3575174	3.51	4	3.39568	4.92378	6.26604	11.1952	8.5	-1.43518	0.0929216	1		117	5	100.798	SNP_3575174	7.93	4	0.210227	0.441667	0.708333	0.141708	18.2	-0.249053	-0.0176137	1
5A	118	5	101.143	SNP_3575167	0.08	4	1.87953	1.98212	2.06204	2.18801	0.2	-0.091253	0.0113298	1		118	5	101.143	SNP_3575167	3.32	4	3.39568	4.95899	6.17469	11.2485	8.1	-1.38951	0.173801	1		118	5	101.143	SNP_3575167	7.48	4	0.210227	0.446629	0.693878	0.143324	17.3	-0.241825	-0.0054232	1
5A	119	5	101.818	SNP_984035	0.08	4	1.88842	1.96484	2.0837	2.18762	0.2	-0.0976373	-0.0212196	1		119	5	101.818	SNP_984035	2.59	4	3.48667	4.92784	6.07261	11.4587	6.3	-1.29297	0.148197	1		119	5	101.818	SNP_984035	6.3	4	0.224359	0.438144	0.690217	0.147672	14.7	-0.232929	-0.0191439	1
5A	120	5	102.507	SNP_3574243	0.49	4	1.75422	2.15012	1.90667	2.16458	1.3	-0.0762222	0.319679	1		120	5	102.507	SNP_3574243	2.71	4	3.66891	4.84412	6.13333	11.424	6.6	-1.23221	-0.0570055	1		120	5	102.507	SNP_3574243	8.05	4	0.206522	0.447059	0.696078	0.141286	18.4	-0.244778	-0.00424126	1
5A	121	5	103.374	SNP_3575065	0.28	4	2.14859	1.84871	2.01119	2.17653	0.7	0.0687	-0.231185	1		121	5	103.374	SNP_3575065	3.14	4	3.58463	4.98511	6.16221	11.2995	7.6	-1.28879	0.111684	1		121	5	103.374	SNP_3575065	7.57	4	0.23077	0.453125	0.694999	0.143015	17.4	-0.232114	-0.00975993	1
5A	122	5	104.374		0.04	6	2.04229	1.92706	2.01422	2.18969	0.1	0.0140339	-0.101192	0.956		122	5	104.374		2.95	5	3.49747	4.97703	6.15158	11.3277	7.4	-1.32705	0.152509	0.956		122	5	104.374		7.5	6	0.226154	0.439216	0.711779	0.14288	17.5	-0.242813	-0.0297506	0.956
5A	123	5	104.81	SNP_2275175	0.01	3	1.95762	1.97281	2.01174	2.19192	0	-0.02706	-0.0118701	1		123	5	104.81	SNP_2275175	2.75	4	3.5507	4.92505	6.1437	11.4133	6.7	-1.2965	0.0778571	1		123	5	104.81	SNP_2275175	7.35	4	0.232558	0.430108	0.717391	0.143798	17	-0.242417	-0.0448672	1
5A	124	5	105.81		0.03	4	1.9331	2.02358	1.93932	2.19042	0.1	-0.00310974	0.0873696	0.976		124	5	105.81		2.69	5	3.53776	4.95045	6.08952	11.4216	6.6	-1.27588	0.136806	0.976		124	5	105.81		6.65	6	0.228871	0.438571	0.701032	0.145115	16.2	-0.236081	-0.0263803	0.976
5A	125	5	106.502	SNP_2265144	0.1	4	1.91767	2.05651	1.89625	2.18664	0.3	0.0107122	0.149549	1		125	5	106.502	SNP_2265144	2.62	4	3.53977	4.98033	6.02792	11.4487	6.4	-1.24407	0.196489	1		125	5	106.502	SNP_2265144	5.69	4	0.227273	0.461111	0.65625	0.149969	13.4	-0.214489	0.0193497	1
5A	126	5	107.502		0.09	5	1.94566	2.05138	1.87927	2.1868	0.3	0.0331942	0.138923	0.953		126	5	107.502		2.57	5	3.54416	4.95763	6.04985	11.4387	6.5	-1.25284	0.160626	0.953		126	5	107.502		6.34	8	0.227979	0.432012	0.702565	0.144272	16.7	-0.237293	-0.0332596	0.953
5A	127	5	108.502		0.08	6	1.98953	2.03737	1.86529	2.18712	0.2	0.06212	0.109959	0.927		127	5	108.502		2.49	6	3.55801	4.93891	6.05157	11.4481	6.4	-1.24678	0.134124	0.927		127	5	108.502		6.69	8	0.230342	0.421834	0.717242	0.14248	17.7	-0.24345	-0.0519579	0.927
5A	128	5	109.502		0.1	5	2.04621	2.01596	1.85496	2.18642	0.3	0.0956284	0.0653763	0.923		128	5	109.502		2.37	6	3.58131	4.92707	6.02908	11.4793	6.2	-1.22388	0.121881	0.923		128	5	109.502		6.76	7	0.235159	0.416501	0.72081	0.142471	17.7	-0.242825	-0.0614835	0.923
5A	129	5	110.502		0.13	5	2.09817	1.99617	1.84734	2.1842	0.4	0.125414	0.0234195	0.941		129	5	110.502		2.22	6	3.61432	4.92481	5.97866	11.5338	5.7	-1.18217	0.128321	0.941		129	5	110.502		6.62	7	0.245101	0.411996	0.717156	0.143816	17	-0.236027	-0.0691324	0.941
5A	130	5	111.502		0.18	4	2.13454	1.98338	1.84173	2.18171	0.5	0.146405	-0.00474837	0.98		130	5	111.502		2.04	5	3.65771	4.9333	5.89895	11.6098	5.1	-1.12062	0.154971	0.98		130	5	111.502		6.27	6	0.268266	0.404663	0.706064	0.146897	15.2	-0.218899	-0.082502	0.98
5A	131	5	111.862	SNP_3574519	0.2	4	2.144	1.98033	1.84021	2.18095	0.5	0.151894	-0.0117738	1		131	5	111.862	SNP_3574519	1.96	4	3.6761	4.93849	5.86398	11.6412	4.9	-1.09394	0.168456	1		131	5	111.862	SNP_3574519	6.11	4	0.280488	0.401103	0.699995	0.148404	14.3	-0.209754	-0.0891385	1
5A	132	5	112.862		0.19	5	2.10787	2.00731	1.82307	2.1814	0.5	0.142403	0.0418386	0.966		132	5	112.862		1.93	5	3.68674	4.93855	5.86835	11.6313	4.9	-1.0908	0.160999	0.966		132	5	112.862		5.94	6	0.246266	0.421287	0.68842	0.147513	14.8	-0.221077	-0.0460559	0.966
5A	133	5	113.862		0.2	4	2.0605	2.03888	1.81011	2.181	0.5	0.125195	0.103573	0.997		133	5	113.862		1.77	4	3.76293	4.94027	5.80233	11.6964	4.4	-1.0197	0.157636	0.997		133	5	113.862		5.11	5	0.249522	0.440319	0.652826	0.15197	12.3	-0.201652	-0.0108552	0.997
5A	134	5	113.913	SNP_3575275	0.2	4	2.05829	2.04035	1.8096	2.18094	0.5	0.124346	0.106402	1		134	5	113.913	SNP_3575275	1.76	4	3.76907	4.94	5.7975	11.7016	4.4	-1.01422	0.156715	1		134	5	113.913	SNP_3575275	5.05	4	0.25	0.442529	0.649038	0.152446	12	-0.199519	-0.0069905	1
5A	135	5	114.913		0.22	4	2.03007	2.05433	1.79532	2.17991	0.6	0.11737	0.141638	0.996		135	5	114.913		1.11	4	3.92629	5.09088	5.47488	11.8943	2.8	-0.774297	0.390296	0.996		135	5	114.913		4.55	6	0.255032	0.454135	0.641536	0.153896	11.1	-0.193252	0.00585128	0.996
5A	136	5	115.003	SNP_3575214	0.22	4	2.02767	2.05517	1.79468	2.17988	0.6	0.116497	0.143995	1		136	5	115.003	SNP_3575214	1.06	4	3.94533	5.10648	5.43694	11.9111	2.6	-0.745803	0.415341	1		136	5	115.003	SNP_3575214	4.42	4	0.255556	0.460227	0.632653	0.154861	10.6	-0.188549	0.016123	1
5A	137	5	116.003		0.22	5	2.03726	2.05439	1.78926	2.17911	0.6	0.124	0.141134	0.969		137	5	116.003		1.17	4	3.89577	5.12844	5.45775	11.8724	3	-0.780991	0.451682	0.969		137	5	116.003		4.33	6	0.252433	0.466494	0.627252	0.154791	10.6	-0.18741	0.0266515	0.969
5A	138	5	117.003		0.21	5	2.04717	2.04817	1.79304	2.17957	0.6	0.127063	0.128065	0.964		138	5	117.003		1.27	5	3.85729	5.15275	5.4643	11.8413	3.2	-0.803507	0.491956	0.964		138	5	117.003		4.16	6	0.250701	0.474626	0.616163	0.155302	10.3	-0.182731	0.0411935	0.964
5A	139	5	118.003		0.19	4	2.05672	2.03699	1.80538	2.18104	0.5	0.125671	0.105945	0.985		139	5	118.003		1.36	4	3.8289	5.17837	5.45941	11.8176	3.4	-0.815255	0.534211	0.985		139	5	118.003		3.96	6	0.250018	0.48786	0.595181	0.156489	9.7	-0.172581	0.0652611	0.985
5A	140	5	118.377	SNP_2305497	0.19	4	2.06	2.0319	1.81167	2.18174	0.5	0.124167	0.0960714	1		140	5	118.377	SNP_2305497	1.39	4	3.82064	5.18788	5.4556	11.8103	3.5	-0.817481	0.549763	1		140	5	118.377	SNP_2305497	3.88	4	0.25	0.494118	0.585	0.156996	9.4	-0.1675	0.0766176	1
5A	141	5	119.377		0.23	4	2.02689	2.06162	1.78891	2.17881	0.6	0.11899	0.153716	0.975		141	5	119.377		1.25	4	3.91473	5.10292	5.54198	11.8472	3.2	-0.813628	0.374561	0.975		141	5	119.377		3.74	6	0.252387	0.491132	0.592055	0.156754	9.5	-0.169834	0.068911	0.975
5A	142	5	120.359	SNP_3574943	0.3	4	1.99766	2.08651	1.7717	2.17541	0.8	0.112979	0.201825	1		142	5	120.359	SNP_3574943	1.13	4	4.0351	5.00298	5.61939	11.8891	2.8	-0.792143	0.175731	1		142	5	120.359	SNP_3574943	3.16	4	0.285714	0.473214	0.596939	0.159914	7.7	-0.155612	0.0318878	1
5A	143	5	121.359		0.15	4	1.99935	2.05784	1.82926	2.18327	0.4	0.0850474	0.14354	0.974		143	5	121.359		1.24	5	4.05714	4.92499	5.72989	11.8462	3.2	-0.836373	0.0314761	0.974		143	5	121.359		2.42	6	0.307739	0.46581	0.587493	0.162305	6.3	-0.139877	0.0181946	0.974
5A	144	5	121.722	SNP_3575094	0.11	4	2.00244	2.04254	1.85428	2.18607	0.3	0.0740814	0.114187	1		144	5	121.722	SNP_3575094	1.24	4	4.08761	4.90678	5.73155	11.856	3.1	-0.821973	-0.00279546	1		144	5	121.722	SNP_3575094	2.05	4	0.333331	0.453128	0.583331	0.164442	5.1	-0.125	-0.00520337	1
5A	145	5	122.722		0.16	4	2.0201	2.04353	1.81561	2.183	0.4	0.102246	0.125679	0.988		145	5	122.722		0.89	4	4.03243	5.08914	5.4124	11.96	2.2	-0.689984	0.366727	0.988		145	5	122.722		2.43	5	0.300283	0.46706	0.584984	0.162744	6	-0.14235	0.0244266	0.988
5A	146	5	122.832	SNP_3575301	0.17	4	2.02279	2.04303	1.81178	2.18269	0.4	0.105506	0.125749	1		146	5	122.832	SNP_3575301	0.85	4	4.03622	5.10533	5.36617	11.9733	2.1	-0.664974	0.404137	1		146	5	122.832	SNP_3575301	2.44	4	0.3	0.466667	0.585106	0.162827	6	-0.142553	0.0241135	1
5A	147	5	123.399	SNP_979078	0.12	4	1.99444	2.0423	1.84244	2.18556	0.3	0.076	0.123854	1		147	5	123.399	SNP_979078	1.13	4	3.94383	5.12136	5.47404	11.8898	2.8	-0.765106	0.412427	1		147	5	123.399	SNP_979078	2.45	4	0.303191	0.46875	0.585106	0.162792	6	-0.140957	0.0246011	1
5A	148	5	124.399		0.11	5	1.9896	2.04521	1.84416	2.18543	0.3	0.0727204	0.128331	0.96		148	5	124.399		1.03	5	3.916	5.16778	5.36803	11.9007	2.7	-0.726017	0.525764	0.96		148	5	124.399		2.21	5	0.306246	0.467565	0.578298	0.163546	5.6	-0.136026	0.0252932	0.96
5A	149	5	125.399		0.1	5	1.98523	2.04515	1.85069	2.18581	0.3	0.0672708	0.127187	0.943		149	5	125.399		0.92	6	3.91845	5.20542	5.25608	11.9224	2.6	-0.668817	0.618155	0.943		149	5	125.399		1.96	5	0.310666	0.466685	0.569747	0.16449	5	-0.12954	0.0264782	0.943
5A	150	5	126.399		0.09	5	1.98174	2.04155	1.86262	2.18675	0.3	0.0595618	0.119373	0.949		150	5	126.399		0.8	6	3.96367	5.22562	5.14685	11.9604	2.2	-0.59159	0.670364	0.949		150	5	126.399		1.7	5	0.316691	0.466321	0.559049	0.165629	4.4	-0.121179	0.0284509	0.949
5A	151	5	127.399		0.07	4	1.9791	2.03484	1.87899	2.18804	0.2	0.0500564	0.105793	0.977		151	5	127.399		0.67	5	4.06096	5.22197	5.0466	12.0169	1.8	-0.492819	0.668195	0.977		151	5	127.399		1.43	5	0.324591	0.466507	0.546152	0.166923	3.6	-0.110781	0.0311352	0.977
5A	152	5	127.893	SNP_3574492	0.06	4	1.978	2.0308	1.88796	2.1887	0.2	0.0450204	0.0978159	1		152	5	127.893	SNP_3574492	0.6	4	4.12707	5.21178	5.00098	12.0492	1.5	-0.436954	0.647751	1		152	5	127.893	SNP_3574492	1.3	4	0.329268	0.466667	0.539216	0.16759	3.2	-0.104974	0.0324247	1
5A	153	5	128.787	SNP_3574988	0.01	3	1.98829	1.99415	1.95	2.19195	0	0.0191463	0.025	1		153	5	128.787	SNP_3574988	0.74	4	4.06619	5.27357	4.99214	12.0073	1.9	-0.462976	0.744405	1		153	5	128.787	SNP_3574988	1.32	4	0.321429	0.482143	0.517857	0.167533	3.3	-0.0982143	0.0625	1
5A	154	5	129.787		0	4	1.96744	1.98433	1.98091	2.19229	0	-0.00673381	0.0101556	0.953		154	5	129.787		0.6	6	4.11425	5.27691	4.9619	12.0241	1.7	-0.423822	0.738838	0.953		154	5	129.787		1.08	6	0.332002	0.476812	0.518879	0.168215	2.9	-0.0934387	0.0513719	0.953
5A	155	5	130.729	SNP_2262130	0.01	3	1.94857	1.97432	2.01074	2.19179	0	-0.0310847	-0.0053351	1		155	5	130.729	SNP_2262130	0.35	4	4.33907	5.17036	4.95714	12.126	0.9	-0.309037	0.522255	1		155	5	130.729	SNP_2262130	0.77	4	0.360465	0.463855	0.517857	0.169843	1.9	-0.078696	0.0246943	1
5A	156	5	131.729		0.05	6	1.98626	2.02966	1.89218	2.18885	0.2	0.0470415	0.0904376	0.961		156	5	131.729		0.13	4	4.54726	4.96513	5.08696	12.1945	0.3	-0.269849	0.148022	0.961		156	5	131.729		0.95	6	0.339965	0.468847	0.521536	0.16886	2.5	-0.0907855	0.0380968	0.961
5A	157	5	132.696	SNP_3575169	0.22	4	2.02892	2.05944	1.80353	2.17968	0.6	0.112695	0.143214	1		157	5	132.696	SNP_3575169	0.12	4	4.79974	4.7767	5.21226	12.1966	0.3	-0.206264	-0.229297	1		157	5	132.696	SNP_3575169	1.02	4	0.335526	0.467033	0.523585	0.168784	2.6	-0.0940293	0.0374774	1
5A	158	5	133.696		0.17	5	2.00575	2.05799	1.82492	2.18216	0.5	0.090413	0.142654	0.958		158	5	133.696		0.07	4	4.82375	4.80446	5.14521	12.2113	0.2	-0.160731	-0.180021	0.958		158	5	133.696		0.99	5	0.334184	0.470118	0.519446	0.168815	2.5	-0.0926307	0.0433027	0.958
5A	159	5	134.696		0.11	7	1.98015	2.0548	1.85058	2.18464	0.4	0.0647865	0.139435	0.931		159	5	134.696		0.03	4	4.84657	4.83707	5.07212	12.2234	0.1	-0.112775	-0.122281	0.931		159	5	134.696		0.96	5	0.33354	0.473143	0.514843	0.168886	2.5	-0.0906516	0.0489512	0.931
5A	160	5	135.696		0.07	8	1.95739	2.04717	1.88117	2.1871	0.2	0.0381117	0.127894	0.918		160	5	135.696		0.01	4	4.86827	4.87341	4.9949	12.2315	0	-0.0633155	-0.0581686	0.918		160	5	135.696		0.93	5	0.333673	0.475992	0.509914	0.168995	2.4	-0.0881206	0.0541988	0.918
5A	161	5	136.696		0.04	7	1.94173	2.03339	1.91635	2.18941	0.1	0.0126888	0.104347	0.92		161	5	136.696		0	4	4.88964	4.91139	4.91647	12.2345	0	-0.0134111	0.00834023	0.92		161	5	136.696		0.89	5	0.334652	0.478542	0.504809	0.169144	2.3	-0.0850786	0.0588118	0.92
5A	162	5	137.696		0.02	6	1.93197	2.01558	1.95315	2.19101	0.1	-0.0105936	0.073024	0.936		162	5	137.696		0.01	4	4.91183	4.94845	4.84018	12.2325	0	0.0358259	0.072442	0.936		162	5	137.696		0.86	5	0.33653	0.480674	0.499675	0.169333	2.2	-0.0815724	0.0625715	0.936
5A	163	5	138.696		0.01	5	1.92474	1.99779	1.98725	2.19152	0	-0.0312566	0.0417998	0.967		163	5	138.696		0.03	4	4.93565	4.98238	4.76894	12.226	0.1	0.0833535	0.130084	0.967		163	5	138.696		0.82	5	0.339337	0.482293	0.494637	0.169565	2.1	-0.0776497	0.0653054	0.967
5A	164	5	139.46	SNP_3575188	0.02	4	1.91973	1.98581	2.00981	2.19128	0	-0.0450425	0.0210417	1		164	5	139.46	SNP_3575188	0.05	4	4.955	5.00539	4.71909	12.2188	0.1	0.117955	0.168348	1		164	5	139.46	SNP_3575188	0.79	4	0.342105	0.483146	0.490909	0.169768	2	-0.0744019	0.0666389	1
5A	165	5	140.46		0.02	5	1.97421	2.0121	1.9316	2.19113	0.1	0.0213034	0.0591886	0.984		165	5	140.46		0.17	4	4.70022	5.1537	4.6757	12.1801	0.4	0.0122599	0.465737	0.984		165	5	140.46		1.18	5	0.323724	0.493038	0.498172	0.168043	3	-0.087224	0.0820904	0.984
5A	166	5	140.711	SNP_3575093	0.03	4	1.98829	2.0147	1.91698	2.19056	0.1	0.0356558	0.0620619	1		166	5	140.711	SNP_3575093	0.22	4	4.65214	5.18477	4.66741	12.1662	0.6	-0.00763228	0.524992	1		166	5	140.711	SNP_3575093	1.26	4	0.321429	0.494186	0.5	0.167763	3.1	-0.0892857	0.0834718	1
5A	167	5	141.622	SNP_3574736	0.27	4	2.07721	1.8445	2.10111	2.17726	0.7	-0.0119509	-0.24466	1		167	5	141.622	SNP_3574736	0.44	4	4.51205	5.30783	4.62255	12.0992	1.1	-0.05525	0.740536	1		167	5	141.622	SNP_3574736	1.18	4	0.329545	0.493976	0.5	0.168097	2.9	-0.0852273	0.0792032	1
5A	168	5	142.613	SNP_1696446	0.03	4	1.96065	1.95	2.03704	2.19085	0.1	-0.0381924	-0.0488446	1		168	5	142.613	SNP_1696446	0.75	4	4.34383	5.4385	4.61964	12.0036	1.9	-0.137903	0.956767	1		168	5	142.613	SNP_1696446	0.98	4	0.345745	0.490625	0.5	0.168954	2.5	-0.0771277	0.0677527	1
5A	169	5	143.613		0.04	5	1.94664	1.94649	2.05493	2.18985	0.1	-0.0541423	-0.0542977	0.955		169	5	143.613		0.74	6	4.29491	5.45511	4.61197	11.9793	2.1	-0.158529	1.00167	0.955		169	5	143.613		0.95	6	0.341653	0.491856	0.499489	0.168748	2.6	-0.0789179	0.0712851	0.955
5A	170	5	144.613		0.06	5	1.93093	1.94349	2.07335	2.18852	0.2	-0.0712091	-0.0586461	0.922		170	5	144.613		0.7	6	4.27383	5.4554	4.60562	11.9713	2.2	-0.165897	1.01568	0.922		170	5	144.613		0.9	6	0.340972	0.491456	0.498624	0.168795	2.5	-0.0788257	0.0716577	0.922
5A	171	5	145.613		0.08	6	1.91364	1.94151	2.09135	2.18688	0.2	-0.0888559	-0.0609858	0.9		171	5	145.613		0.66	7	4.27702	5.44212	4.60122	11.978	2.1	-0.162099	1.003	0.9		171	5	145.613		0.83	7	0.3429	0.489969	0.497382	0.16903	2.4	-0.0772409	0.0698279	0.9
5A	172	5	146.613		0.11	6	1.89501	1.94101	2.10782	2.18506	0.3	-0.106405	-0.0604034	0.89		172	5	146.613		0.61	7	4.29856	5.41923	4.59895	11.9953	2	-0.150195	0.970472	0.89		172	5	146.613		0.76	7	0.346704	0.487881	0.49571	0.169383	2.2	-0.0745031	0.0666741	0.89
5A	173	5	147.613		0.14	6	1.8755	1.94228	2.12176	2.18318	0.4	-0.12313	-0.0563477	0.89		173	5	147.613		0.56	7	4.33307	5.39017	4.59877	12.0187	1.8	-0.13285	0.924257	0.89		173	5	147.613		0.68	6	0.351844	0.485545	0.49356	0.169801	2	-0.0708579	0.0628425	0.89
5A	174	5	148.613		0.17	6	1.85576	1.94536	2.13245	2.1814	0.5	-0.138343	-0.0487416	0.902		174	5	148.613		0.51	6	4.37619	5.35754	4.60055	12.0448	1.6	-0.112178	0.869171	0.902		174	5	148.613		0.6	6	0.357908	0.483205	0.490913	0.170244	1.7	-0.0665027	0.0587939	0.902
5A	175	5	149.613		0.2	5	1.83652	1.95004	2.13951	2.17982	0.6	-0.151495	-0.0379789	0.924		175	5	149.613		0.46	6	4.42427	5.32337	4.60412	12.071	1.3	-0.0899222	0.809173	0.924		175	5	149.613		0.53	6	0.364565	0.481018	0.487797	0.17068	1.5	-0.0616162	0.0548371	0.924
5A	176	5	150.613		0.23	5	1.81849	1.9559	2.14305	2.17852	0.6	-0.162281	-0.02487	0.958		176	5	150.613		0.42	5	4.47429	5.28918	4.60922	12.0957	1.1	-0.0674675	0.747427	0.958		176	5	150.613		0.46	5	0.371534	0.479075	0.484281	0.171091	1.2	-0.0563739	0.0511675	0.958
5A	177	5	151.537	SNP_3574111	0.26	4	1.80333	1.96195	2.14353	2.17759	0.7	-0.170098	-0.0114773	1		177	5	151.537	SNP_3574111	0.38	4	1.80333	1.96195	2.14353	2.17759	0.7	-0.170098	-0.0114773	1		177	5	151.537	SNP_3574111	0.41	4	0.378049	0.477528	0.480769	0.171434	1	-0.0513602	0.0481191	1

## Sheet: C6
	48hai	Intervall (0.95)	2.5													72hai	Intervall (0.95)	2.7													Macro	Intervall (0.95)	2.6
Chromosome	Nr	Group	Position	Locus	LOD	# Iter.	mu_A	mu_H	mu_B	Variance	% Expl.	Additive	Dominance	GIC		Nr	Group	Position	Locus	LOD	# Iter.	mu_A	mu_H	mu_B	Variance	% Expl.	Additive	Dominance	GIC		Nr	Group	Position	Locus	LOD	# Iter.	mu_A	mu_H	mu_B	Variance	% Expl.	Additive	Dominance	GIC
6A	1	5	0	SNP_3574645	1.85	4	1.85098	1.7606	2.53605	2.08323	4.7	-0.342533	-0.432918	1		1	5	0	SNP_3574645	0.04	4	5.22745	5.00483	4.94136	14.031	0.1	0.143044	-0.0795797	1		1	5	0	SNP_3574645	0.26	4	0.313725	0.206897	0.227273	0.313096	0.7	0.0432264	-0.0636026	1
6A	2	5	1		1.84	5	1.85809	1.74987	2.55073	2.07756	4.9	-0.346322	-0.454542	0.957		2	5	1		0.03	4	5.2308	4.99931	4.94943	14.0308	0.1	0.140689	-0.0908013	0.957		2	5	1		0.28	5	0.318998	0.203108	0.229122	0.312759	0.8	0.0449379	-0.0709516	0.957
6A	3	5	2		1.84	6	1.86596	1.73895	2.56482	2.0718	5.2	-0.34943	-0.476433	0.917		3	5	2		0.03	5	5.23327	4.99431	4.95751	14.0307	0.1	0.137878	-0.101082	0.917		3	5	2		0.31	6	0.324628	0.19903	0.231158	0.312364	0.9	0.0467351	-0.078863	0.917
6A	4	5	3		1.82	7	1.87458	1.72791	2.57812	2.06601	5.5	-0.351767	-0.498439	0.88		4	5	3		0.03	5	5.2346	4.99002	4.96542	14.0307	0.1	0.13459	-0.109996	0.88		4	5	3		0.33	7	0.330581	0.194686	0.233375	0.311908	1	0.0486027	-0.087292	0.88
6A	5	5	4		1.81	8	1.88396	1.71682	2.59044	2.06026	5.7	-0.353238	-0.520377	0.846		5	5	4		0.03	5	5.23457	4.98668	4.97295	14.0308	0.1	0.130807	-0.117076	0.846		5	5	4		0.35	8	0.336787	0.190119	0.235756	0.311388	1.2	0.0505155	-0.0961526	0.846
6A	6	5	5		1.79	9	1.89406	1.70579	2.60155	2.05465	6	-0.353745	-0.542023	0.815		6	5	5		0.03	6	5.23298	4.98447	4.97994	14.0311	0.1	0.12652	-0.121987	0.815		6	5	5		0.38	9	0.343145	0.185399	0.238272	0.310808	1.4	0.0524364	-0.10531	0.815
6A	7	5	6		1.77	9	1.90484	1.69495	2.6112	2.0493	6.2	-0.353182	-0.563067	0.787		7	5	6		0.03	6	5.22948	4.98373	4.98605	14.0316	0.1	0.121716	-0.124036	0.787		7	5	6		0.41	9	0.349506	0.180632	0.240877	0.310179	1.6	0.0543145	-0.11456	0.787
6A	8	5	7		1.75	10	1.91626	1.68441	2.61916	2.04431	6.5	-0.35145	-0.583307	0.762		8	5	7		0.02	6	5.22387	4.98467	4.99108	14.0324	0.1	0.116392	-0.122802	0.762		8	5	7		0.43	10	0.355726	0.175916	0.243525	0.309517	1.8	0.0561004	-0.123709	0.762
6A	9	5	8		1.72	11	1.92825	1.67433	2.62513	2.03985	6.7	-0.348439	-0.602358	0.74		9	5	8		0.02	7	5.21604	4.98741	4.99493	14.0334	0.1	0.110558	-0.118073	0.74		9	5	8		0.46	11	0.361612	0.171392	0.246147	0.308844	2	0.0577325	-0.132488	0.74
6A	10	5	9		1.69	11	1.94069	1.66494	2.62876	2.03611	6.8	-0.344035	-0.619781	0.72		10	5	9		0.02	7	5.20562	4.99236	4.99719	14.0347	0.1	0.104216	-0.109046	0.72		10	5	9		0.48	12	0.366984	0.167188	0.248673	0.30819	2.2	0.0591555	-0.140641	0.72
6A	11	5	10		1.65	12	1.95357	1.65633	2.62984	2.0332	7	-0.338133	-0.63538	0.704		11	5	10		0.01	7	5.19256	4.9996	4.99778	14.0362	0.1	0.0973885	-0.0955647	0.704		11	5	10		0.51	12	0.371668	0.163431	0.251029	0.307584	2.4	0.0603193	-0.147918	0.704
6A	12	5	11		1.61	12	1.96675	1.64876	2.62798	2.03135	7	-0.330615	-0.648605	0.69		12	5	11		0.01	7	5.17678	5.00926	4.99657	14.0377	0	0.0901033	-0.0774193	0.69		12	5	11		0.53	12	0.375546	0.160203	0.253161	0.307053	2.6	0.0611925	-0.154151	0.69
6A	13	5	12		1.57	13	1.98026	1.64228	2.62303	2.03064	7.1	-0.321386	-0.659359	0.679		13	5	12		0.01	7	5.15831	5.02138	4.99351	14.0392	0	0.0823997	-0.0545335	0.679		13	5	12		0.54	13	0.378552	0.157552	0.255033	0.306616	2.7	0.0617598	-0.15924	0.679
6A	14	5	13		1.52	13	1.99397	1.63714	2.61466	2.03126	7.1	-0.310345	-0.667165	0.671		14	5	13		0.01	6	5.13714	5.03604	4.98852	14.0405	0	0.0743103	-0.0267934	0.671		14	5	13		0.55	13	0.380589	0.15555	0.256587	0.306296	2.8	0.0620009	-0.163038	0.671
6A	15	5	14		1.47	13	2.00791	1.63338	2.60279	2.03321	7	-0.297441	-0.671972	0.665		15	5	14		0	5	5.11372	5.05284	4.98198	14.0414	0	0.065871	0.00499273	0.665		15	5	14		0.56	13	0.381652	0.154202	0.25781	0.306101	2.9	0.0619212	-0.165529	0.665
6A	16	5	15		1.42	13	2.02208	1.63101	2.58744	2.03649	6.8	-0.282678	-0.673746	0.662		16	5	15		0	6	5.0883	5.07182	4.97367	14.0415	0	0.0573182	0.0408298	0.662		16	5	15		0.56	13	0.381745	0.153511	0.258685	0.306036	2.9	0.0615299	-0.166704	0.662
6A	17	5	16		1.37	13	2.03644	1.63002	2.56876	2.04098	6.6	-0.266159	-0.672581	0.662		17	5	16		0	7	5.06084	5.09296	4.96373	14.0408	0	0.0485574	0.0806776	0.662		17	5	16		0.56	13	0.380893	0.153468	0.259207	0.3061	2.9	0.0608427	-0.166582	0.662
6A	18	5	17		1.32	13	2.0509	1.63032	2.54714	2.04647	6.4	-0.248116	-0.668697	0.665		18	5	17		0.01	8	5.03198	5.11579	4.95255	14.0391	0	0.0397122	0.123525	0.665		18	5	17		0.56	13	0.379136	0.154054	0.259375	0.306286	2.8	0.0598808	-0.165201	0.665
6A	19	5	18		1.27	13	2.06525	1.63179	2.52313	2.05269	6.1	-0.228938	-0.662398	0.67		19	5	18		0.01	8	5.00239	5.13971	4.94063	14.0362	0.1	0.0308821	0.1682	0.67		19	5	18		0.55	13	0.376534	0.155243	0.259195	0.306585	2.7	0.0586693	-0.162621	0.67
6A	20	5	19		1.23	13	2.07917	1.6343	2.49747	2.05936	5.8	-0.209146	-0.654017	0.678		20	5	19		0.02	8	4.97249	5.16443	4.92818	14.032	0.1	0.0221562	0.214099	0.678		20	5	19		0.53	12	0.373141	0.157014	0.258675	0.306985	2.6	0.0572332	-0.158894	0.678
6A	21	5	20		1.19	12	2.09221	1.63778	2.47087	2.06625	5.5	-0.189326	-0.643758	0.689		21	5	20		0.03	8	4.9428	5.18951	4.91557	14.0267	0.1	0.0136163	0.260329	0.689		21	5	20		0.52	12	0.369073	0.159295	0.257852	0.307465	2.4	0.0556101	-0.154168	0.689
6A	22	5	21		1.15	12	2.10405	1.64206	2.44412	2.07312	5.1	-0.170036	-0.632018	0.703		22	5	21		0.04	8	4.91383	5.2145	4.90316	14.0203	0.2	0.00533583	0.306009	0.703		22	5	21		0.5	11	0.364389	0.162063	0.25674	0.308009	2.3	0.0538244	-0.148502	0.703
6A	23	5	22		1.11	11	2.11423	1.64721	2.41765	2.07992	4.8	-0.151713	-0.618727	0.719		23	5	22		0.05	8	4.88604	5.23898	4.89129	14.013	0.2	-0.00262362	0.350309	0.719		23	5	22		0.47	11	0.359227	0.165226	0.255395	0.308595	2.1	0.0519159	-0.142085	0.719
6A	24	5	23		1.08	10	2.12258	1.65318	2.39184	2.08659	4.5	-0.134632	-0.604034	0.738		24	5	23		0.07	8	4.85985	5.26255	4.88027	14.0052	0.3	-0.0102132	0.392486	0.738		24	5	23		0.45	10	0.353666	0.168741	0.253845	0.309205	1.9	0.0499108	-0.135015	0.738
6A	25	5	24		1.05	10	2.12907	1.65988	2.3669	2.09312	4.2	-0.118914	-0.588104	0.76		25	5	24		0.08	8	4.83557	5.28488	4.87037	13.997	0.3	-0.0173975	0.431913	0.76		25	5	24		0.42	10	0.34785	0.172503	0.252156	0.309816	1.7	0.0478472	-0.1275	0.76
6A	26	5	25		1.03	9	2.13366	1.66739	2.34282	2.09954	3.9	-0.104579	-0.57085	0.785		26	5	25		0.1	7	4.81351	5.30564	4.86182	13.9888	0.4	-0.0241531	0.467968	0.785		26	5	25		0.4	9	0.341872	0.17645	0.250367	0.310413	1.5	0.0457523	-0.119669	0.785
6A	27	5	26		1	8	2.13652	1.67558	2.31964	2.10583	3.6	-0.0915584	-0.552495	0.813		27	5	26		0.13	7	4.79369	5.32479	4.85463	13.9807	0.4	-0.0304679	0.500625	0.813		27	5	26		0.37	8	0.335852	0.18049	0.248536	0.310982	1.3	0.0436579	-0.111704	0.813
6A	28	5	27		0.98	8	2.13787	1.68435	2.29737	2.11195	3.4	-0.079751	-0.533274	0.843		28	5	27		0.15	6	4.77634	5.34202	4.84901	13.9732	0.5	-0.0363384	0.529351	0.843		28	5	27		0.35	7	0.32989	0.184544	0.246709	0.311512	1.2	0.0415905	-0.103756	0.843
6A	29	5	28		0.96	7	2.13787	1.69362	2.27597	2.11788	3.1	-0.0690503	-0.513304	0.877		29	5	28		0.18	6	4.76135	5.35741	4.84489	13.9663	0.6	-0.0417678	0.554292	0.877		29	5	28		0.32	7	0.324076	0.188541	0.244928	0.311994	1	0.0395737	-0.0959606	0.877
6A	30	5	29		0.94	6	2.13676	1.70324	2.25545	2.12359	2.8	-0.0593424	-0.492861	0.914		30	5	29		0.2	5	4.74879	5.3708	4.84232	13.9603	0.6	-0.046765	0.575246	0.914		30	5	29		0.3	6	0.318465	0.192436	0.243218	0.312428	0.9	0.0376231	-0.0884051	0.914
6A	31	5	30		0.93	5	2.13475	1.7131	2.2358	2.12902	2.6	-0.0505246	-0.472172	0.954		31	5	30		0.23	5	4.73854	5.38229	4.84122	13.9552	0.6	-0.0513423	0.592405	0.954		31	5	30		0.28	5	0.313111	0.196182	0.241605	0.312812	0.8	0.0357527	-0.0811755	0.954
6A	32	5	31		0.91	4	2.13202	1.72308	2.21703	2.13415	2.3	-0.0425059	-0.451448	0.997		32	5	31		0.26	4	4.7305	5.39188	4.84153	13.9511	0.7	-0.0555148	0.605867	0.997		32	5	31		0.25	4	0.308045	0.199751	0.240104	0.313147	0.6	0.0339709	-0.0743239	0.997
6A	33	5	31.072	SNP_3574552	0.91	4	2.1318	1.7238	2.21571	2.13451	2.3	-0.0419571	-0.44996	1		33	5	31.072	SNP_3574552	0.26	4	4.73	5.3925	4.8416	13.9509	0.7	-0.0558	0.6067	1		33	5	31.072	SNP_3574552	0.25	4	0.307692	0.2	0.24	0.31317	0.6	0.0338462	-0.0738462	1
6A	34	5	32.072		1.23	5	2.10888	1.68926	2.29745	2.11551	3.2	-0.0942859	-0.5139	0.966		34	5	32.072		0.3	5	4.75273	5.42749	4.75089	13.9309	0.8	0.000918152	0.675684	0.966		34	5	32.072		0.31	5	0.299315	0.185481	0.273434	0.312567	0.8	0.0129406	-0.100893	0.966
6A	35	5	32.475	SNP_1277732	1.34	4	2.0976	1.68291	2.31653	2.11118	3.4	-0.109465	-0.524154	1		35	5	32.475	SNP_1277732	0.3	4	4.77176	5.41519	4.749	13.9377	0.8	0.0113824	0.654803	1		35	5	32.475	SNP_1277732	0.33	4	0.294118	0.185185	0.28	0.312585	0.8	0.00705882	-0.101874	1
6A	36	5	33.471	SNP_2276707	1.45	4	2.0976	1.68476	2.35457	2.10511	3.7	-0.128483	-0.541327	1		36	5	33.471	SNP_2276707	0.69	4	4.72231	5.58193	4.48043	13.8001	1.7	0.120941	0.980561	1		36	5	33.471	SNP_2276707	0.16	4	0.288462	0.204819	0.255319	0.313886	0.4	0.0165712	-0.0670711	1
6A	37	5	34.06	SNP_1234695	1.56	4	2.11122	1.66667	2.35187	2.0987	4	-0.120325	-0.564883	1		37	5	34.06	SNP_1234695	0.36	4	4.7149	5.44512	4.74449	13.9167	0.9	-0.0147939	0.715426	1		37	5	34.06	SNP_1234695	0.16	4	0.294118	0.207317	0.244898	0.313874	0.4	0.0246098	-0.0621907	1
6A	38	5	34.187	SNP_1127053	1.52	4	2.0976	1.66963	2.35187	2.10094	3.9	-0.127137	-0.555112	1		38	5	34.187	SNP_1127053	0.36	4	4.72231	5.44938	4.74449	13.9168	0.9	-0.0110911	0.715984	1		38	5	34.187	SNP_1127053	0.14	4	0.288462	0.209877	0.244898	0.314101	0.3	0.0217818	-0.0568032	1
6A	39	5	34.424	SNP_1216665	1.31	4	2.12125	1.6911	2.30937	2.11232	3.3	-0.0940622	-0.524215	1		39	5	34.424	SNP_1216665	0.67	4	4.61521	5.58313	4.59755	13.8069	1.7	0.00882767	0.976749	1		39	5	34.424	SNP_1216665	0.2	4	0.300001	0.204819	0.244898	0.313622	0.5	0.0275515	-0.0676306	1
6A	40	5	35.424		1.25	5	2.09651	1.68818	2.32599	2.11017	3.4	-0.11474	-0.523071	0.958		40	5	35.424		0.33	5	4.72682	5.45437	4.71283	13.9099	1	0.00699596	0.734545	0.958		40	5	35.424		0.22	5	0.298844	0.197593	0.256991	0.313337	0.6	0.0209266	-0.0803244	0.958
6A	41	5	36.424		1.1	6	2.0669	1.69799	2.32608	2.1143	3.3	-0.12959	-0.498504	0.956		41	5	36.424		0.08	5	4.92434	5.25283	4.85565	14.0104	0.2	0.0343433	0.362833	0.956		41	5	36.424		0.26	5	0.296989	0.191521	0.267203	0.313029	0.7	0.0148931	-0.0905745	0.956
6A	42	5	37.424		0.82	5	2.03329	1.75058	2.26827	2.13791	2.2	-0.117494	-0.400201	0.995		42	5	37.424		0.01	3	5.12128	5.04213	4.99772	14.0414	0	0.0617815	-0.017373	0.995		42	5	37.424		0.29	4	0.294387	0.187716	0.27407	0.312826	0.7	0.0101583	-0.0965124	0.995
6A	43	5	37.514	SNP_1233518	0.78	4	2.0302	1.75962	2.257	2.14161	2	-0.113398	-0.383982	1		43	5	37.514	SNP_1233518	0.01	3	5.13529	5.02575	5.00941	14.0409	0	0.0629412	-0.0466029	1		43	5	37.514	SNP_1233518	0.3	4	0.294118	0.1875	0.27451	0.312816	0.7	0.00980392	-0.0968137	1
6A	44	5	38.377	SNP_3574150	0.81	4	2.10894	1.7325	2.20583	2.13934	2.1	-0.0484454	-0.424887	0.995		44	5	38.377	SNP_3574150	0.16	4	4.72585	5.29419	5.00366	13.9881	0.4	-0.138908	0.429436	0.995		44	5	38.377	SNP_3574150	0.2	4	0.287731	0.196079	0.265418	0.313531	0.5	0.0111566	-0.0804959	0.995
6A	45	5	39.377		0.72	5	2.04475	1.76142	2.24835	2.14241	2	-0.101799	-0.385135	0.96		45	5	39.377		0.04	5	4.84873	5.10817	5.15855	14.0278	0.1	-0.154909	0.104531	0.96		45	5	39.377		0.18	5	0.286642	0.198506	0.267491	0.313609	0.5	0.00957552	-0.07856	0.96
6A	46	5	40.377		0.71	4	1.98475	1.79297	2.27608	2.14536	1.8	-0.145664	-0.33745	0.994		46	5	40.377		0.1	4	5.04869	4.88507	5.34131	14.0081	0.3	-0.146313	-0.309929	0.994		46	5	40.377		0.18	4	0.287806	0.20128	0.265594	0.313701	0.5	0.0111061	-0.0754207	0.994
6A	47	5	40.428	SNP_3575062	0.71	4	1.98191	1.79492	2.27666	2.14563	1.8	-0.147379	-0.33437	0.997		47	5	40.428	SNP_3575062	0.11	4	5.05656	4.87579	5.35039	14.0052	0.3	-0.146913	-0.32769	0.997		47	5	40.428	SNP_3575062	0.18	4	0.287934	0.201476	0.265305	0.313708	0.5	0.0113146	-0.0751437	0.997
6A	48	5	41.428		0.91	5	1.98475	1.77349	2.33421	2.13254	2.4	-0.17473	-0.38599	0.967		48	5	41.428		0.05	5	4.99816	4.94377	5.30238	14.021	0.2	-0.152108	-0.206501	0.967		48	5	41.428		0.2	5	0.287808	0.198725	0.272475	0.313492	0.5	0.00766632	-0.0814168	0.967
6A	49	5	42.428		1.12	5	1.98684	1.75707	2.38601	2.12014	3	-0.199584	-0.429354	0.961		49	5	42.428		0.02	5	4.92883	5.04162	5.20275	14.0338	0.1	-0.136963	-0.0241717	0.961		49	5	42.428		0.21	5	0.287315	0.197356	0.278059	0.313344	0.6	0.004628	-0.0853313	0.961
6A	50	5	43.428		1.32	5	1.98794	1.74617	2.42816	2.10999	3.4	-0.22011	-0.461879	0.978		50	5	43.428		0.03	4	4.86695	5.13713	5.08505	14.0306	0.1	-0.109048	0.161137	0.978		50	5	43.428		0.22	5	0.286437	0.198178	0.280183	0.313356	0.6	0.00312724	-0.0851326	0.978
6A	51	5	44.051	SNP_3575225	1.45	4	1.98809	1.74202	2.44905	2.10516	3.7	-0.230481	-0.476544	1		51	5	44.051	SNP_3575225	0.06	4	4.83837	5.17989	5.02721	14.0231	0.1	-0.094421	0.247101	1		51	5	44.051	SNP_3575225	0.22	4	0.285714	0.2	0.27907	0.313468	0.5	0.00332226	-0.082392	1
6A	52	5	45.051		1.48	7	2.10317	1.67828	2.41416	2.09131	4.3	-0.155495	-0.580388	0.938		52	5	45.051		0.26	6	4.57416	5.36807	4.96653	13.9309	0.8	-0.196187	0.597725	0.938		52	5	45.051		0.13	6	0.285204	0.205255	0.264454	0.313892	0.4	0.0103748	-0.0695737	0.938
6A	53	5	46.051		1.59	6	2.1493	1.64836	2.37894	2.08576	4.6	-0.114819	-0.615758	0.948		53	5	46.051		0.55	5	4.41032	5.51765	4.9147	13.8214	1.6	-0.252191	0.85514	0.948		53	5	46.051		0.11	6	0.281427	0.208547	0.258143	0.314153	0.3	0.0116415	-0.0612382	0.948
6A	54	5	46.759	SNP_1093705	1.62	4	2.16529	1.65223	2.32781	2.09542	4.1	-0.0812581	-0.594318	1		54	5	46.759	SNP_1093705	0.74	4	4.38453	5.57498	4.89173	13.784	1.8	-0.253602	0.936847	1		54	5	46.759	SNP_1093705	0.14	4	0.283019	0.207315	0.255323	0.314102	0.3	0.0138477	-0.0618561	1
6A	55	5	47.759		0.87	7	2.17999	1.73013	2.25592	2.12516	2.8	-0.0379682	-0.487827	0.964		55	5	47.759		0.37	6	4.42198	5.39954	4.9972	13.8817	1.2	-0.28761	0.689946	0.964		55	5	47.759		0.12	5	0.293403	0.217743	0.236668	0.314204	0.3	0.0283675	-0.0472923	0.964
6A	56	5	48.165	SNP_3574458	0.46	4	2.15643	1.82075	2.12651	2.15963	1.2	0.0149585	-0.320717	1		56	5	48.165	SNP_3574458	0.19	4	4.61545	5.25798	5.04795	13.9756	0.5	-0.21625	0.426274	1		56	5	48.165	SNP_3574458	0.12	4	0.295455	0.223404	0.227273	0.314258	0.3	0.0340909	-0.0379594	1
6A	57	5	48.782	SNP_1005205	0.7	4	2.08378	1.78622	2.2514	2.14591	1.8	-0.0838088	-0.381364	1		57	5	48.782	SNP_1005205	0.03	4	4.89319	5.1544	5.00932	14.0314	0.1	-0.0580633	0.203141	1		57	5	48.782	SNP_1005205	0.14	4	0.297872	0.21978	0.227273	0.314074	0.4	0.0352998	-0.0427923	1
6A	58	5	49.331	SNP_3575324	0.73	4	2.12822	1.77656	2.22512	2.14441	1.9	-0.048447	-0.400114	1		58	5	49.331	SNP_3575324	0.03	4	4.9166	5.14121	5.01159	14.0345	0.1	-0.0474976	0.177115	1		58	5	49.331	SNP_3575324	0.27	4	0.319149	0.208791	0.227273	0.313038	0.7	0.0459381	-0.0644196	1
6A	59	5	49.569	SNP_1379979	0.89	4	2.12822	1.75811	2.26372	2.13552	2.3	-0.0677494	-0.43786	1		59	5	49.569	SNP_1379979	0.02	4	4.9166	5.13352	5.0275	14.0354	0.1	-0.0554521	0.161469	1		59	5	49.569	SNP_1379979	0.27	4	0.319149	0.208791	0.227273	0.313038	0.7	0.0459381	-0.0644196	1
6A	60	5	50.457	SNP_3574284	0.55	4	2.10804	1.79141	2.17234	2.15442	1.4	-0.0321485	-0.34878	1		60	5	50.457	SNP_3574284	0.11	4	4.87062	5.26337	4.85417	14.0035	0.3	0.00822917	0.400976	1		60	5	50.457	SNP_3574284	0.28	4	0.3125	0.197674	0.25	0.312923	0.7	0.03125	-0.0835756	1
6A	61	5	51.457		0.75	5	2.11668	1.74959	2.21614	2.1417	2	-0.0497331	-0.416821	0.963		61	5	51.457		0.14	5	4.78397	5.30003	4.92179	13.9902	0.4	-0.0689102	0.447149	0.963		61	5	51.457		0.37	5	0.324836	0.192743	0.231993	0.312021	1	0.0464215	-0.0856708	0.963
6A	62	5	51.788	SNP_3574885	0.77	4	2.10904	1.7487	2.21905	2.14219	2	-0.0550062	-0.415342	0.998		62	5	51.788	SNP_3574885	0.13	4	4.79559	5.2828	4.95397	13.9973	0.3	-0.0791914	0.408022	0.998		62	5	51.788	SNP_3574885	0.37	4	0.321382	0.197108	0.223124	0.312254	0.9	0.049129	-0.0751444	0.998
6A	63	5	52.788		0.81	5	2.12316	1.7371	2.23548	2.13653	2.2	-0.0561593	-0.442217	0.946		63	5	52.788		0.14	5	4.77718	5.29851	4.9379	13.9898	0.4	-0.0803612	0.44097	0.946		63	5	52.788		0.38	6	0.325044	0.188608	0.2355	0.311766	1.1	0.0447718	-0.0916643	0.946
6A	64	5	53.788		0.84	6	2.13532	1.72762	2.25028	2.13142	2.5	-0.0574786	-0.465179	0.902		64	5	53.788		0.14	6	4.75935	5.31447	4.91996	13.9818	0.4	-0.0803035	0.47481	0.902		64	5	53.788		0.4	7	0.328188	0.1795	0.25047	0.311104	1.3	0.0388593	-0.109829	0.902
6A	65	5	54.788		0.85	7	2.1444	1.72097	2.26306	2.12733	2.7	-0.0593283	-0.48276	0.867		65	5	54.788		0.15	6	4.74311	5.32987	4.90052	13.9735	0.5	-0.078705	0.508053	0.867		65	5	54.788		0.44	8	0.330228	0.17024	0.267993	0.310266	1.6	0.0311172	-0.128871	0.867
6A	66	5	55.788		0.85	8	2.14931	1.71782	2.27348	2.12472	2.8	-0.0620862	-0.493573	0.842		66	5	55.788		0.16	7	4.72942	5.34397	4.88009	13.9654	0.6	-0.0753372	0.539209	0.842		66	5	55.788		0.48	9	0.330481	0.161553	0.287561	0.309299	1.9	0.0214598	-0.147468	0.842
6A	67	5	56.788		0.83	8	2.14899	1.71878	2.28126	2.12401	2.8	-0.0661347	-0.496343	0.825		67	5	56.788		0.17	7	4.7194	5.35574	4.85955	13.9582	0.6	-0.0700752	0.566264	0.825		67	5	56.788		0.54	10	0.328399	0.154196	0.30832	0.308288	2.2	0.0100393	-0.164164	0.825
6A	68	5	57.788		0.8	8	2.14252	1.72438	2.2862	2.12544	2.7	-0.0718395	-0.489973	0.817		68	5	57.788		0.17	8	4.71365	5.36463	4.83963	13.9524	0.6	-0.0629928	0.587986	0.817		68	5	57.788		0.61	10	0.323906	0.148612	0.329283	0.307313	2.5	-0.00268875	-0.177983	0.817
6A	69	5	58.788		0.75	9	2.12917	1.73505	2.28819	2.12907	2.6	-0.079512	-0.473634	0.818		69	5	58.788		0.18	7	4.71278	5.36991	4.8214	13.9487	0.7	-0.0543125	0.60282	0.818		69	5	58.788		0.69	9	0.317542	0.14491	0.349227	0.306431	2.8	-0.0158427	-0.188474	0.818
6A	70	5	59.788		0.69	9	2.10852	1.75099	2.28722	2.13468	2.3	-0.0893497	-0.446883	0.828		70	5	59.788		0.19	7	4.71652	5.37166	4.80537	13.9471	0.7	-0.0444252	0.610719	0.828		70	5	59.788		0.78	9	0.310095	0.143096	0.366759	0.305718	3	-0.028332	-0.195332	0.828
6A	71	5	60.788		0.62	8	2.08134	1.77165	2.28339	2.14155	2	-0.101026	-0.410717	0.846		71	5	60.788		0.2	7	4.72459	5.36989	4.79216	13.9478	0.7	-0.0337856	0.611514	0.846		71	5	60.788		0.88	8	0.302035	0.143196	0.380884	0.305273	3.1	-0.0394248	-0.198264	0.846
6A	72	5	61.788		0.55	7	2.05021	1.79532	2.27697	2.14862	1.7	-0.113383	-0.368275	0.874		72	5	61.788		0.2	6	4.73639	5.3649	4.78213	13.9504	0.7	-0.022874	0.605636	0.874		72	5	61.788		0.96	8	0.293501	0.145086	0.391429	0.305136	3.2	-0.0489636	-0.197379	0.874
6A	73	5	62.788		0.49	6	2.0189	1.81953	2.26832	2.1549	1.4	-0.12471	-0.32408	0.91		73	5	62.788		0.21	6	4.75101	5.35728	4.77527	13.9546	0.6	-0.0121308	0.594143	0.91		73	5	62.788		1.04	7	0.284554	0.148495	0.398733	0.305284	3.1	-0.0570894	-0.193148	0.91
6A	74	5	63.788		0.43	5	1.99058	1.84227	2.25779	2.15999	1.2	-0.133606	-0.281916	0.955		74	5	63.788		0.22	5	4.76766	5.34756	4.77151	13.96	0.6	-0.00192407	0.57798	0.955		74	5	63.788		1.11	6	0.275403	0.153012	0.403315	0.305641	3	-0.0639561	-0.186347	0.955
6A	75	5	64.622	SNP_1030325	0.39	4	1.97037	1.85943	2.24784	2.16336	1	-0.138734	-0.249679	1		75	5	64.622	SNP_1030325	0.22	4	4.7825	5.33831	4.77054	13.9651	0.6	0.00597973	0.561794	1		75	5	64.622	SNP_1030325	1.16	4	0.267857	0.157303	0.405405	0.306037	2.9	-0.0687741	-0.179328	1
6A	76	5	65.622		0.24	5	1.96241	1.8853	2.18995	2.1715	0.6	-0.113771	-0.190888	0.982		76	5	65.622		0.22	4	4.6981	5.32882	4.92469	13.9649	0.6	-0.113299	0.517422	0.982		76	5	65.622		1.07	4	0.271466	0.158092	0.392627	0.306728	2.7	-0.0605808	-0.173954	0.982
6A	77	5	66.154	SNP_3574610	0.17	4	1.9517	1.90616	2.15308	2.17597	0.4	-0.100689	-0.146225	1		77	5	66.154	SNP_3574610	0.22	4	4.66218	5.31261	5.01308	13.9645	0.6	-0.175448	0.474984	1		77	5	66.154	SNP_3574610	1.01	4	0.272727	0.159091	0.384615	0.307212	2.5	-0.0559441	-0.16958	1
6A	78	5	67.154		0.15	5	1.95979	1.90207	2.14434	2.17636	0.4	-0.0922731	-0.150001	0.966		78	5	67.154		0.17	4	4.70772	5.28392	5.02794	13.9818	0.4	-0.160109	0.416086	0.966		78	5	67.154		0.85	5	0.260637	0.1656	0.380115	0.308109	2.2	-0.0597393	-0.154775	0.966
6A	79	5	68.154		0.14	5	1.96622	1.9	2.13313	2.177	0.4	-0.0834537	-0.149677	0.954		79	5	68.154		0.12	4	4.75868	5.24725	5.04754	13.9993	0.3	-0.144431	0.344136	0.954		79	5	68.154		0.69	5	0.245398	0.176514	0.372024	0.309368	1.8	-0.063313	-0.132198	0.954
6A	80	5	69.154		0.13	5	1.97003	1.90068	2.11995	2.17791	0.3	-0.0749584	-0.14431	0.965		80	5	69.154		0.08	4	4.81311	5.20466	5.06929	14.0151	0.2	-0.128089	0.263463	0.965		80	5	69.154		0.55	5	0.227848	0.191074	0.361351	0.310643	1.4	-0.0667515	-0.103525	0.965
6A	81	5	70.154		0.11	4	1.97141	1.90399	2.10552	2.17902	0.3	-0.0670544	-0.134479	0.998		81	5	70.154		0.05	4	4.86835	5.15928	5.0901	14.0275	0.1	-0.110874	0.180053	0.998		81	5	70.154		0.45	4	0.211174	0.206667	0.349362	0.311598	1.1	-0.0690937	-0.0736016	0.998
6A	82	5	70.197	SNP_3574195	0.11	4	1.97143	1.90418	2.10488	2.17907	0.3	-0.0667276	-0.133979	1		82	5	70.197	SNP_3574195	0.04	4	4.8707	5.15732	5.09093	14.028	0.1	-0.110114	0.176501	1		82	5	70.197	SNP_3574195	0.45	4	0.210526	0.207317	0.348837	0.31163	1.1	-0.0691554	-0.0723647	1
6A	83	5	71.169	SNP_3574433	0.09	4	1.97019	1.91481	2.08953	2.18055	0.2	-0.0596748	-0.115045	1		83	5	71.169	SNP_3574433	0.15	4	4.72545	5.12298	5.33047	13.9907	0.4	-0.302505	0.0950164	1		83	5	71.169	SNP_3574433	0.45	4	0.2	0.214286	0.348837	0.311595	1.1	-0.0744186	-0.0601329	1
6A	84	5	72.169		0.1	5	1.97663	1.90523	2.10031	2.17937	0.3	-0.0618398	-0.133238	0.954		84	5	72.169		0.12	5	4.74167	5.12398	5.3077	13.9968	0.3	-0.283018	0.0992921	0.954		84	5	72.169		0.53	6	0.196038	0.209449	0.36341	0.310572	1.5	-0.0836859	-0.070275	0.954
6A	85	5	73.169		0.11	6	1.98468	1.89426	2.11179	2.17787	0.3	-0.0635545	-0.153974	0.915		85	5	73.169		0.1	5	4.76335	5.12269	5.28234	14.0037	0.3	-0.259495	0.0998513	0.915		85	5	73.169		0.63	7	0.192406	0.203489	0.379754	0.309273	1.9	-0.0936742	-0.0825915	0.915
6A	86	5	74.169		0.13	7	1.99419	1.88211	2.12379	2.17601	0.4	-0.0648007	-0.176875	0.883		86	5	74.169		0.08	6	4.79119	5.11846	5.25486	14.0114	0.2	-0.231835	0.0954409	0.883		86	5	74.169		0.74	8	0.189221	0.196614	0.39736	0.307692	2.4	-0.10407	-0.0966763	0.883
6A	87	5	75.169		0.14	8	2.0046	1.86932	2.13596	2.1738	0.5	-0.0656794	-0.200959	0.858		87	5	75.169		0.06	6	4.82578	5.11061	5.22592	14.0196	0.2	-0.200069	0.0847532	0.858		87	5	75.169		0.86	9	0.186642	0.18926	0.415263	0.305891	2.9	-0.11431	-0.111693	0.858
6A	88	5	76.169		0.16	9	2.01491	1.85678	2.14775	2.17136	0.6	-0.0664189	-0.224544	0.84		88	5	76.169		0.04	6	4.86716	5.09883	5.19613	14.0275	0.1	-0.164486	0.067181	0.84		88	5	76.169		1	9	0.184893	0.181979	0.432192	0.304011	3.5	-0.12365	-0.126564	0.84
6A	89	5	77.169		0.18	9	2.02381	1.84574	2.15843	2.16896	0.8	-0.0673062	-0.245381	0.83		89	5	77.169		0.02	6	4.91458	5.08337	5.16598	14.0345	0.1	-0.125702	0.0430905	0.83		89	5	77.169		1.15	9	0.184168	0.175274	0.446977	0.302236	4.1	-0.131405	-0.140298	0.83
6A	90	5	78.169		0.2	10	2.03027	1.83722	2.16723	2.16693	0.8	-0.0684817	-0.261527	0.827		90	5	78.169		0.01	6	4.96636	5.06515	5.13577	14.0397	0	-0.0847054	0.0140835	0.827		90	5	78.169		1.3	9	0.184496	0.169476	0.458906	0.300718	4.6	-0.137205	-0.152225	0.827
6A	91	5	79.169		0.21	10	2.03347	1.8322	2.17328	2.16562	0.9	-0.0699068	-0.271178	0.83		91	5	79.169		0	4	5.02009	5.04564	5.10563	14.0426	0	-0.0427698	-0.0172254	0.83		91	5	79.169		1.45	9	0.185734	0.164693	0.467835	0.299535	5	-0.14105	-0.162092	0.83
6A	92	5	80.169		0.22	9	2.03332	1.83111	2.17582	2.16525	0.9	-0.0712482	-0.273456	0.841		92	5	80.169		0	5	5.07272	5.02673	5.07564	14.043	0	-0.00145718	-0.0474521	0.841		92	5	80.169		1.59	8	0.187658	0.160878	0.473996	0.298695	5.2	-0.143169	-0.169949	0.841
6A	93	5	81.169		0.22	9	2.03032	1.83393	2.17428	2.16587	0.9	-0.0719795	-0.268365	0.859		93	5	81.169		0	6	5.12214	5.00964	5.04598	14.0413	0	0.0380776	-0.0744238	0.859		93	5	81.169		1.73	8	0.190034	0.157913	0.477779	0.298165	5.4	-0.143873	-0.175993	0.859
6A	94	5	82.169		0.22	8	2.02518	1.8404	2.16828	2.16742	0.8	-0.0715505	-0.256331	0.884		94	5	82.169		0.01	6	5.16623	4.99564	5.01681	14.0379	0	0.0747081	-0.0958741	0.884		94	5	82.169		1.85	7	0.192642	0.155698	0.479566	0.297901	5.5	-0.143462	-0.180406	0.884
6A	95	5	83.169		0.21	7	2.01895	1.8497	2.15815	2.16962	0.7	-0.0695978	-0.238844	0.916		95	5	83.169		0.02	5	5.20417	4.98505	4.98852	14.0336	0.1	0.107823	-0.111299	0.916		95	5	83.169		1.97	6	0.19529	0.154154	0.479697	0.297859	5.5	-0.142204	-0.183339	0.916
6A	96	5	84.169		0.2	6	2.01258	1.86067	2.14492	2.1721	0.6	-0.0661704	-0.218081	0.956		96	5	84.169		0.04	4	5.23589	4.97768	4.96159	14.0289	0.1	0.137149	-0.121056	0.956		96	5	84.169		2.08	5	0.197818	0.153241	0.47845	0.298002	5.4	-0.140316	-0.184893	0.956
6A	97	5	85.119	SNP_3575250	0.19	4	2.00704	1.87146	2.13095	2.17438	0.5	-0.0619577	-0.197531	1		97	5	85.119	SNP_3575250	0.05	4	5.26055	4.97329	4.93762	14.0246	0.1	0.161463	-0.125788	1		97	5	85.119	SNP_3575250	2.18	4	0.2	0.152941	0.47619	0.298285	5.4	-0.138095	-0.185154	1
6A	98	5	86.119		0.25	4	2.09023	1.84261	2.07367	2.17096	0.7	0.00827914	-0.239337	0.999		98	5	86.119		0.01	3	5.13934	5.0053	5.02627	14.0401	0	0.0565397	-0.0775053	0.999		98	5	86.119		1.59	5	0.193091	0.174926	0.452572	0.302566	4	-0.12974	-0.147905	0.999
6A	99	5	86.135	SNP_3574509	0.26	4	2.09088	1.84272	2.0725	2.17097	0.7	0.0091886	-0.238973	1		99	5	86.135	SNP_3574509	0.01	3	5.13737	5.00588	5.02775	14.0402	0	0.0548092	-0.0766769	1		99	5	86.135	SNP_3574509	1.57	4	0.192982	0.176471	0.45	0.302913	3.9	-0.128509	-0.145021	1
6A	100	5	87.135		0.3	5	2.11291	1.82382	2.06911	2.16705	0.8	0.0218996	-0.267188	0.964		100	5	87.135		0.03	4	5.18787	5.01679	4.93715	14.0342	0.1	0.125362	-0.0457196	0.964		100	5	87.135		1.8	6	0.193111	0.16156	0.464506	0.299996	4.8	-0.135698	-0.167249	0.964
6A	101	5	88.135		0.32	4	2.1196	1.81991	2.05841	2.16657	0.9	0.0305947	-0.269095	0.983		101	5	88.135		0.06	4	5.23318	5.03107	4.85675	14.0238	0.1	0.188214	-0.0138934	0.983		101	5	88.135		1.78	5	0.193043	0.161713	0.450345	0.301007	4.5	-0.128651	-0.159981	0.983
6A	102	5	88.444	SNP_1216013	0.32	4	2.11839	1.82182	2.054	2.16718	0.8	0.0321964	-0.264378	1		102	5	88.444	SNP_1216013	0.07	4	5.24561	5.03588	4.83489	14.0201	0.2	0.205363	-0.00437646	1		102	5	88.444	SNP_1216013	1.75	4	0.192982	0.1625	0.444444	0.301515	4.3	-0.125731	-0.156213	1
6A	103	5	89.444		0.39	5	2.14694	1.80647	2.05244	2.16215	1.1	0.0472533	-0.293216	0.957		103	5	89.444		0.06	4	5.24546	5.03409	4.8364	14.0206	0.2	0.204531	-0.00684046	0.957		103	5	89.444		1.79	5	0.201772	0.155713	0.454028	0.300525	4.6	-0.126128	-0.172187	0.957
6A	104	5	90.444		0.45	5	2.17274	1.79551	2.0467	2.15758	1.3	0.0630196	-0.314212	0.93		104	5	90.444		0.06	5	5.24531	5.02714	4.84789	14.0219	0.2	0.198714	-0.019455	0.93		104	5	90.444		1.81	6	0.210573	0.150024	0.46126	0.299728	4.9	-0.125344	-0.185893	0.93
6A	105	5	91.444		0.5	6	2.19483	1.79004	2.03504	2.15406	1.4	0.0798979	-0.324899	0.921		105	5	91.444		0.05	5	5.24528	5.01456	4.87118	14.0239	0.1	0.187051	-0.0436667	0.921		105	5	91.444		1.79	6	0.218616	0.146243	0.464904	0.299332	5	-0.123144	-0.195517	0.921
6A	106	5	92.444		0.55	6	2.21302	1.79038	2.01624	2.15187	1.5	0.0983873	-0.324254	0.928		106	5	92.444		0.05	4	5.2451	4.99779	4.90467	14.0259	0.1	0.170218	-0.0770972	0.928		106	5	92.444		1.73	6	0.225466	0.145229	0.463308	0.299613	4.9	-0.118921	-0.199158	0.928
6A	107	5	93.444		0.59	5	2.22755	1.79575	1.99066	2.15078	1.6	0.118443	-0.313351	0.952		107	5	93.444		0.04	4	5.24427	4.98006	4.9429	14.0273	0.1	0.150686	-0.113523	0.952		107	5	93.444		1.59	6	0.231085	0.148396	0.45357	0.300988	4.5	-0.111242	-0.193931	0.952
6A	108	5	94.444		0.62	4	2.23884	1.80434	1.96078	2.15025	1.6	0.139029	-0.295474	0.993		108	5	94.444		0.04	4	5.24236	4.96451	4.97975	14.0278	0.1	0.131305	-0.146544	0.993		108	5	94.444		1.38	5	0.235756	0.158758	0.429754	0.304092	3.5	-0.096999	-0.173997	0.993
6A	109	5	94.583	SNP_3574961	0.63	4	2.24018	1.80566	1.9565	2.1502	1.6	0.141841	-0.292678	1		109	5	94.583	SNP_3574961	0.04	4	5.242	4.96264	4.9845	14.0279	0.1	0.12875	-0.150606	1		109	5	94.583	SNP_3574961	1.34	4	0.236364	0.16092	0.425	0.304667	3.3	-0.0943182	-0.169762	1
6A	110	5	95.583		0.62	5	2.25402	1.79955	1.94917	2.14689	1.8	0.152424	-0.30205	0.955		110	5	95.583		0.05	4	5.24973	4.9645	4.97071	14.0267	0.1	0.139511	-0.14572	0.955		110	5	95.583		1.3	6	0.235249	0.158066	0.430062	0.303953	3.6	-0.0974062	-0.174589	0.955
6A	111	5	96.583		0.61	7	2.26683	1.79452	1.94104	2.14378	1.9	0.162896	-0.309412	0.915		111	5	96.583		0.05	5	5.25544	4.9689	4.95451	14.0257	0.1	0.150467	-0.136073	0.915		111	5	96.583		1.24	7	0.233784	0.15669	0.432455	0.303565	3.7	-0.0993359	-0.176429	0.915
6A	112	5	97.583		0.59	8	2.27801	1.79106	1.93201	2.14107	2	0.172998	-0.31395	0.881		112	5	97.583		0.05	5	5.25866	4.97625	4.93572	14.025	0.1	0.161469	-0.120941	0.881		112	5	97.583		1.17	7	0.231852	0.156767	0.43237	0.303501	3.7	-0.100259	-0.175344	0.881
6A	113	5	98.583		0.57	8	2.2869	1.78968	1.92203	2.13901	2.1	0.182435	-0.314784	0.852		113	5	98.583		0.05	5	5.259	4.98691	4.9143	14.0244	0.1	0.172349	-0.0997398	0.852		113	5	98.583		1.08	8	0.229363	0.158246	0.43004	0.303736	3.6	-0.100338	-0.171456	0.852
6A	114	5	99.583		0.55	9	2.29291	1.79081	1.91111	2.13782	2.2	0.1909	-0.311197	0.827		114	5	99.583		0.05	5	5.25615	5.00113	4.89029	14.0239	0.1	0.182928	-0.0720924	0.827		114	5	99.583		0.98	9	0.226237	0.161133	0.425605	0.304246	3.5	-0.099684	-0.164789	0.827
6A	115	5	100.583		0.52	10	2.29538	1.79494	1.89929	2.1377	2.2	0.198045	-0.302402	0.808		115	5	100.583		0.05	5	5.24994	5.019	4.8639	14.0231	0.1	0.193023	-0.0379145	0.808		115	5	100.583		0.87	9	0.222406	0.165496	0.41911	0.305006	3.2	-0.0983521	-0.155262	0.808
6A	116	5	101.583		0.49	11	2.29373	1.80247	1.88671	2.13881	2.1	0.203511	-0.287748	0.793		116	5	101.583		0.05	5	5.24039	5.04046	4.83547	14.0219	0.2	0.202456	0.00253152	0.793		116	5	101.583		0.76	10	0.217831	0.171442	0.410525	0.305988	2.9	-0.0963468	-0.142736	0.793
6A	117	5	102.583		0.45	11	2.28735	1.8138	1.87352	2.14121	2	0.206919	-0.266632	0.784		117	5	102.583		0.06	5	5.22767	5.06522	4.80555	14.0198	0.2	0.211064	0.0486146	0.784		117	5	102.583		0.65	10	0.212502	0.179137	0.399711	0.307158	2.5	-0.0936047	-0.126969	0.784
6A	118	5	103.583		0.41	12	2.27596	1.82905	1.86004	2.1448	1.9	0.207959	-0.238949	0.779		118	5	103.583		0.06	6	5.2121	5.09294	4.77464	14.0166	0.2	0.218732	0.0995677	0.779		118	5	103.583		0.54	10	0.206486	0.188717	0.38652	0.308458	2.1	-0.0900171	-0.107786	0.779
6A	119	5	104.583		0.37	12	2.25923	1.84832	1.84656	2.14937	1.6	0.206336	-0.204571	0.78		119	5	104.583		0.07	6	5.1943	5.1228	4.74368	14.0121	0.2	0.225309	0.153808	0.78		119	5	104.583		0.44	11	0.199966	0.200198	0.370902	0.3098	1.7	-0.0854678	-0.0852356	0.78
6A	120	5	105.583		0.33	12	2.23753	1.87118	1.83354	2.15449	1.4	0.201996	-0.16436	0.785		120	5	105.583		0.08	6	5.17496	5.15402	4.71345	14.0061	0.3	0.230751	0.209818	0.785		120	5	105.583		0.35	10	0.193231	0.213375	0.353061	0.311056	1.3	-0.0799149	-0.0597714	0.785
6A	121	5	106.583		0.3	11	2.21188	1.8966	1.82149	2.15956	1.2	0.195195	-0.12008	0.795		121	5	106.583		0.1	7	5.15477	5.1858	4.68469	13.9988	0.3	0.235036	0.266065	0.795		121	5	106.583		0.29	10	0.186718	0.227513	0.333921	0.312066	1	-0.0736015	-0.0328067	0.795
6A	122	5	107.583		0.27	10	2.18434	1.92278	1.811	2.16394	1	0.186669	-0.0748946	0.81		122	5	107.583		0.12	7	5.13467	5.217	4.65832	13.9904	0.4	0.238173	0.320504	0.81		122	5	107.583		0.25	9	0.180826	0.241569	0.314904	0.31272	0.8	-0.067039	-0.00629668	0.81
6A	123	5	108.583		0.25	9	2.15737	1.94764	1.80256	2.16723	0.8	0.177404	-0.0323207	0.83		123	5	108.583		0.14	6	5.11533	5.24683	4.63492	13.9813	0.4	0.240207	0.371703	0.83		123	5	108.583		0.23	7	0.175822	0.254519	0.297469	0.313012	0.7	-0.0608232	0.0178738	0.83
6A	124	5	109.583		0.24	8	2.13294	1.96961	1.79642	2.16944	0.7	0.168262	0.00492739	0.856		124	5	109.583		0.17	6	5.09722	5.2747	4.61482	13.9719	0.5	0.241202	0.41868	0.856		124	5	109.583		0.24	6	0.171777	0.265784	0.282457	0.313025	0.7	-0.0553397	0.0386671	0.856
6A	125	5	110.583		0.23	6	2.11204	1.98793	1.79258	2.17079	0.7	0.159729	0.0356184	0.886		125	5	110.583		0.2	6	5.08083	5.3	4.59836	13.9629	0.6	0.241235	0.460402	0.886		125	5	110.583		0.26	6	0.168621	0.275273	0.269996	0.312867	0.7	-0.0506873	0.0559644	0.886
6A	126	5	111.583		0.23	5	2.09485	2.00252	1.79092	2.17162	0.6	0.151963	0.0596351	0.921		126	5	111.583		0.23	5	5.06642	5.32236	4.58564	13.9546	0.6	0.240388	0.496327	0.921		126	5	111.583		0.3	6	0.16625	0.283096	0.259893	0.312627	0.8	-0.0468216	0.0700246	0.921
6A	127	5	112.583		0.23	4	2.08095	2.01375	1.79118	2.17217	0.6	0.144887	0.0776868	0.962		127	5	112.583		0.26	5	5.05407	5.34163	4.57657	13.9473	0.7	0.23875	0.526306	0.962		127	5	112.583		0.34	5	0.164552	0.289453	0.251823	0.312367	0.9	-0.0436351	0.0812659	0.962
6A	128	5	113.377	SNP_3575346	0.23	4	2.07192	2.0206	1.79257	2.17254	0.6	0.139674	0.088354	0.997		128	5	113.377	SNP_3575346	0.28	4	5.04575	5.35468	4.57186	13.9425	0.7	0.236942	0.545877	0.997		128	5	113.377	SNP_3575346	0.38	4	0.163617	0.293592	0.246642	0.312171	1	-0.0415127	0.0884624	0.997
6A	129	5	114.377		0.24	4	2.08488	2.01345	1.78687	2.17154	0.6	0.149005	0.077568	0.954		129	5	114.377		0.23	5	5.08218	5.31509	4.58503	13.9556	0.6	0.248576	0.481489	0.954		129	5	114.377		0.35	5	0.165007	0.293794	0.243621	0.312228	0.9	-0.039307	0.0894801	0.954
6A	130	5	115.377		0.26	5	2.09943	2.00498	1.78169	2.17037	0.7	0.15887	0.0644216	0.92		130	5	115.377		0.19	5	5.12361	5.26833	4.60629	13.9696	0.5	0.258658	0.403379	0.92		130	5	115.377		0.32	6	0.167111	0.293277	0.240849	0.312344	0.9	-0.0368693	0.0892968	0.92
6A	131	5	116.377		0.27	6	2.11476	1.99582	1.77702	2.16903	0.7	0.168873	0.049927	0.897		131	5	116.377		0.15	5	5.16937	5.2155	4.6355	13.9828	0.4	0.266937	0.313069	0.897		131	5	116.377		0.29	6	0.170042	0.291908	0.23848	0.312527	0.8	-0.0342191	0.0876471	0.897
6A	132	5	117.377		0.29	6	2.12962	1.98691	1.77281	2.1676	0.8	0.178402	0.035693	0.883		132	5	117.377		0.13	5	5.21825	5.15842	4.6718	13.9934	0.4	0.273228	0.213396	0.883		132	5	117.377		0.25	6	0.173906	0.289612	0.236606	0.312781	0.8	-0.0313501	0.084356	0.883
6A	133	5	118.377		0.31	6	2.14266	1.97918	1.76901	2.16621	0.9	0.186827	0.0233453	0.88		133	5	118.377		0.11	5	5.26858	5.09945	4.71367	13.9999	0.3	0.277454	0.108328	0.88		133	5	118.377		0.22	6	0.178769	0.286395	0.23524	0.313096	0.7	-0.0282356	0.0793903	0.88
6A	134	5	119.377		0.33	6	2.15292	1.97327	1.76555	2.16502	0.9	0.193684	0.0140325	0.886		134	5	119.377		0.11	5	5.31837	5.04119	4.75903	14.0015	0.3	0.27967	0.00249073	0.886		134	5	119.377		0.18	6	0.184618	0.282365	0.234319	0.313453	0.5	-0.0248504	0.0728965	0.886
6A	135	5	120.377		0.35	6	2.15995	1.9694	1.76244	2.16417	1	0.198754	0.00820135	0.903		135	5	120.377		0.12	5	5.36568	4.98613	4.80557	13.9981	0.3	0.280054	-0.0994995	0.903		135	5	120.377		0.14	6	0.191311	0.277735	0.233719	0.313823	0.4	-0.0212044	0.0652204	0.903
6A	136	5	121.377		0.36	5	2.16375	1.96743	1.75969	2.16372	1	0.202028	0.00570887	0.929		136	5	121.377		0.14	4	5.4088	4.93626	4.85106	13.9908	0.4	0.278869	-0.193668	0.929		136	5	121.377		0.11	5	0.198563	0.272805	0.233294	0.314171	0.3	-0.0173656	0.0568761	0.929
6A	137	5	122.377		0.38	5	2.16467	1.96703	1.75738	2.16364	1	0.203648	0.0060052	0.965		137	5	122.377		0.17	4	5.44652	4.89292	4.8937	13.981	0.4	0.276408	-0.277195	0.965		137	5	122.377		0.08	5	0.205994	0.267902	0.232905	0.314469	0.2	-0.0134554	0.0484523	0.965
6A	138	5	123.138	SNP_2276045	0.38	4	2.16373	1.96753	1.75594	2.16382	1	0.203891	0.00769314	1		138	5	123.138	SNP_2276045	0.2	4	5.47115	4.86473	4.92346	13.9727	0.5	0.273847	-0.332579	1		138	5	123.138	SNP_2276045	0.07	4	0.211538	0.264359	0.232573	0.314654	0.2	-0.0105174	0.0423034	1
6A	139	5	124.138		0.26	4	2.12218	1.97255	1.79026	2.17044	0.7	0.165961	0.0163314	0.978		139	5	124.138		0.23	4	5.48589	4.86879	4.84934	13.9611	0.6	0.318272	-0.298822	0.978		139	5	124.138		0.03	5	0.221528	0.256032	0.240527	0.314962	0.1	-0.00949971	0.0250049	0.978
6A	140	5	124.618	SNP_3026721	0.21	4	2.10267	1.97488	1.80795	2.17335	0.6	0.147358	0.0195677	1		140	5	124.618	SNP_3026721	0.23	4	5.47664	4.88203	4.81578	13.9606	0.6	0.330433	-0.264186	1		140	5	124.618	SNP_3026721	0.01	4	0.228052	0.250012	0.244444	0.315089	0	-0.00819603	0.0137639	1
6A	141	5	125.618		0.25	4	2.11995	1.97115	1.79751	2.17127	0.6	0.161223	0.0124249	0.962		141	5	125.618		0.18	5	5.43723	4.92649	4.80621	13.9767	0.5	0.31551	-0.195225	0.962		141	5	125.618		0.01	4	0.231431	0.24577	0.247124	0.315133	0	-0.0078465	0.00649195	0.962
6A	142	5	126.618		0.28	4	2.13739	1.96745	1.78837	2.16919	0.7	0.174507	0.00457347	0.948		142	5	126.618		0.13	5	5.377	4.9804	4.79606	13.9944	0.4	0.29047	-0.106133	0.948		142	5	126.618		0	4	0.235313	0.24128	0.250458	0.315149	0	-0.00757225	-0.00160587	0.948
6A	143	5	127.618		0.32	4	2.15422	1.96411	1.78072	2.16721	0.8	0.18675	-0.00335851	0.957		143	5	127.618		0.09	4	5.29801	5.03873	4.78825	14.0098	0.2	0.254882	-0.00439517	0.957		143	5	127.618		0.01	4	0.239546	0.237149	0.253558	0.315134	0	-0.00700581	-0.00940273	0.957
6A	144	5	128.618		0.35	4	2.16966	1.96139	1.77465	2.16548	0.9	0.197507	-0.0107675	0.99		144	5	128.618		0.07	4	5.21136	5.09188	4.78604	14.0192	0.2	0.212659	0.093177	0.99		144	5	128.618		0.01	4	0.243953	0.233889	0.255574	0.315102	0	-0.00581042	-0.0158739	0.99
6A	145	5	128.831	SNP_3575303	0.36	4	2.17271	1.96091	1.77357	2.16516	0.9	0.199568	-0.0122308	1		145	5	128.831	SNP_3575303	0.07	4	5.19327	5.10167	4.78651	14.0204	0.2	0.203377	0.111778	1		145	5	128.831	SNP_3575303	0.01	4	0.244898	0.233333	0.255814	0.315095	0	-0.005458	-0.0170226	1
6A	146	5	129.831		0.3	5	2.16194	1.96063	1.78868	2.16773	0.8	0.186631	-0.0146797	0.975		146	5	129.831		0.09	4	5.30011	5.04436	4.78769	14.0107	0.2	0.25621	0.000460877	0.975		146	5	129.831		0.11	5	0.25889	0.21236	0.284224	0.314245	0.3	-0.0126669	-0.0591966	0.975
6A	147	5	130.752	SNP_3574248	0.24	4	2.1366	1.96719	1.80571	2.17169	0.6	0.165441	-0.003964	1		147	5	130.752	SNP_3574248	0.13	4	5.38271	4.99725	4.79814	13.998	0.3	0.292284	-0.0931712	1		147	5	130.752	SNP_3574248	0.26	4	0.270833	0.197802	0.302326	0.313124	0.7	-0.0157461	-0.0887773	1
6A	148	5	131.752		0.24	4	2.13516	1.96966	1.79977	2.17135	0.6	0.167693	0.002194	0.957		148	5	131.752		0.11	4	5.37596	4.98939	4.81879	14.001	0.3	0.278582	-0.10798	0.957		148	5	131.752		0.29	5	0.270928	0.193054	0.312339	0.312597	0.8	-0.0207058	-0.09858	0.957
6A	149	5	132.752		0.24	5	2.13283	1.97264	1.79366	2.17106	0.7	0.169583	0.00940164	0.918		149	5	132.752		0.1	5	5.36722	4.98125	4.84257	14.0043	0.3	0.262327	-0.12365	0.918		149	5	132.752		0.33	7	0.27095	0.187932	0.323259	0.311952	1	-0.0261543	-0.109173	0.918
6A	150	5	133.752		0.23	5	2.12955	1.97616	1.78742	2.17081	0.7	0.171064	0.0176765	0.884		150	5	133.752		0.09	6	5.35635	4.97283	4.86966	14.0079	0.3	0.243345	-0.140167	0.884		150	5	133.752		0.37	8	0.270853	0.182557	0.334892	0.311186	1.3	-0.0320197	-0.120315	0.884
6A	151	5	134.752		0.23	6	2.1253	1.98022	1.78111	2.1706	0.7	0.172098	0.0270131	0.853		151	5	134.752		0.07	6	5.34318	4.96421	4.90019	14.0115	0.2	0.221497	-0.157472	0.853		151	5	134.752		0.42	9	0.270553	0.177139	0.346905	0.310316	1.5	-0.038176	-0.13159	0.853
6A	152	5	135.752		0.23	6	2.1201	1.98478	1.77481	2.17043	0.7	0.172642	0.0373261	0.827		152	5	135.752		0.06	6	5.32769	4.9554	4.93426	14.0151	0.2	0.196716	-0.175576	0.827		152	5	135.752		0.46	10	0.269926	0.171967	0.35884	0.309383	1.8	-0.0444568	-0.142416	0.827
6A	153	5	136.752		0.22	6	2.11398	1.98981	1.76865	2.17029	0.7	0.172664	0.0484966	0.805		153	5	136.752		0.05	7	5.31007	4.94624	4.972	14.0183	0.2	0.169032	-0.194794	0.805		153	5	136.752		0.51	10	0.268817	0.167371	0.370194	0.308451	2.1	-0.0506887	-0.152134	0.805
6A	154	5	137.752		0.22	7	2.107	1.99525	1.7627	2.17017	0.7	0.172147	0.0604035	0.788		154	5	137.752		0.04	7	5.29026	4.93693	5.01314	14.021	0.2	0.13856	-0.214772	0.788		154	5	137.752		0.55	11	0.267088	0.163616	0.380563	0.307583	2.4	-0.0567371	-0.160209	0.788
6A	155	5	138.752		0.22	7	2.09929	2.00097	1.75717	2.17008	0.7	0.171062	0.0727405	0.774		155	5	138.752		0.04	8	5.26877	4.92726	5.05762	14.0228	0.1	0.105573	-0.235936	0.774		155	5	138.752		0.6	11	0.264604	0.16093	0.389613	0.306843	2.6	-0.0625047	-0.166178	0.774
6A	156	5	139.752		0.21	7	2.091	2.00687	1.75219	2.17	0.7	0.169403	0.0852713	0.764		156	5	139.752		0.03	8	5.24572	4.91749	5.10472	14.0235	0.1	0.0705028	-0.257731	0.764		156	5	139.752		0.63	12	0.261311	0.159404	0.397196	0.306271	2.8	-0.0679425	-0.169849	0.764
6A	157	5	140.752		0.21	7	2.08227	2.0128	1.74792	2.16995	0.7	0.167172	0.0977037	0.759		157	5	140.752		0.03	8	5.22164	4.90765	5.15375	14.0229	0.1	0.0339441	-0.280044	0.759		157	5	140.752		0.66	12	0.257167	0.159107	0.403191	0.305893	2.9	-0.0730117	-0.171072	0.759
6A	158	5	141.752		0.21	8	2.07325	2.01866	1.74447	2.16993	0.7	0.164388	0.109802	0.757		158	5	141.752		0.04	8	5.19696	4.89798	5.20367	14.0208	0.2	-0.00335852	-0.30234	0.757		158	5	141.752		0.68	12	0.252218	0.160018	0.40758	0.305715	3	-0.0776812	-0.169881	0.757
6A	159	5	142.752		0.21	8	2.06416	2.02426	1.74206	2.16995	0.7	0.161052	0.121149	0.76		159	5	142.752		0.04	8	5.1721	4.88882	5.25321	14.0174	0.2	-0.0405521	-0.323839	0.76		159	5	142.752		0.7	12	0.246555	0.162081	0.41037	0.305727	3	-0.0819075	-0.166381	0.76
6A	160	5	143.752		0.21	8	2.05514	2.02948	1.74074	2.17004	0.7	0.157197	0.131537	0.767		160	5	143.752		0.05	8	5.14743	4.88061	5.30093	14.0128	0.2	-0.0767485	-0.343577	0.767		160	5	143.752		0.7	11	0.240318	0.165212	0.411582	0.305911	2.9	-0.0856321	-0.160738	0.767
6A	161	5	144.752		0.21	7	2.04635	2.0342	1.74065	2.17019	0.7	0.152848	0.140701	0.777		161	5	144.752		0.06	8	5.12323	4.87381	5.34547	14.0075	0.3	-0.111117	-0.360538	0.777		161	5	144.752		0.71	11	0.233732	0.169247	0.411308	0.306233	2.8	-0.088788	-0.153273	0.777
6A	162	5	145.752		0.2	7	2.03786	2.03838	1.74174	2.17043	0.7	0.14806	0.148585	0.792		162	5	145.752		0.07	8	5.0997	4.86885	5.38565	14.0019	0.3	-0.142973	-0.373828	0.792		162	5	145.752		0.71	10	0.227013	0.174039	0.409618	0.306663	2.7	-0.0913024	-0.144277	0.792
6A	163	5	146.752		0.2	7	2.02979	2.04195	1.74405	2.17077	0.7	0.142866	0.155025	0.811		163	5	146.752		0.09	7	5.07693	4.86609	5.42055	13.9966	0.3	-0.171806	-0.382646	0.811		163	5	146.752		0.7	10	0.220427	0.179372	0.406669	0.307163	2.5	-0.093121	-0.134177	0.811
6A	164	5	147.752		0.2	7	2.02219	2.04486	1.74756	2.1712	0.6	0.137317	0.159982	0.834		164	5	147.752		0.1	7	5.05517	4.86545	5.45004	13.9918	0.4	-0.197439	-0.387158	0.834		164	5	147.752		0.69	9	0.214179	0.185069	0.402608	0.307705	2.4	-0.0942146	-0.123324	0.834
6A	165	5	148.752		0.2	6	2.01512	2.04712	1.75219	2.17172	0.6	0.131465	0.163461	0.861		165	5	148.752		0.12	6	5.03436	4.86708	5.47384	13.9878	0.4	-0.219738	-0.387027	0.861		165	5	148.752		0.68	8	0.208449	0.190936	0.397644	0.308258	2.2	-0.0945973	-0.11211	0.861
6A	166	5	149.752		0.2	6	2.00856	2.04876	1.75781	2.17232	0.6	0.125378	0.165575	0.893		166	5	149.752		0.14	6	5.0147	4.87066	5.49239	13.9848	0.4	-0.238845	-0.382889	0.893		166	5	149.752		0.67	7	0.203352	0.196806	0.391999	0.308802	2	-0.0943236	-0.10087	0.893
6A	167	5	150.752		0.2	5	2.00254	2.04982	1.76431	2.17299	0.6	0.119116	0.166403	0.928		167	5	150.752		0.15	5	4.99618	4.87605	5.50598	13.9826	0.4	-0.254901	-0.375029	0.928		167	5	150.752		0.66	6	0.198944	0.202536	0.385907	0.309319	1.9	-0.0934812	-0.0898893	0.928
6A	168	5	151.752		0.2	4	1.99702	2.05037	1.77152	2.17371	0.5	0.112747	0.1661	0.968		168	5	151.752		0.17	4	4.97889	4.8829	5.51521	13.9813	0.4	-0.268161	-0.364153	0.968		168	5	151.752		0.65	5	0.195238	0.208013	0.379592	0.309796	1.7	-0.0921769	-0.079402	0.968
6A	169	5	152.475	SNP_3064868	0.2	4	1.99333	2.05048	1.77711	2.17425	0.5	0.108114	0.165263	1		169	5	152.475	SNP_3064868	0.18	4	4.96719	4.88859	5.5195	13.9808	0.4	-0.276154	-0.354758	1		169	5	152.475	SNP_3064868	0.64	4	0.192982	0.211765	0.375	0.310112	1.6	-0.0910088	-0.0722265	1
6A	170	5	153.475		0.24	5	1.9961	2.05894	1.75578	2.17165	0.6	0.120157	0.183004	0.966		170	5	153.475		0.14	5	4.96974	4.90102	5.48914	13.9888	0.4	-0.259701	-0.328422	0.966		170	5	153.475		0.61	4	0.188236	0.216299	0.37246	0.310233	1.6	-0.0921122	-0.0640495	0.966
6A	171	5	154.475		0.28	5	2.00042	2.06533	1.73624	2.16912	0.7	0.132092	0.196993	0.949		171	5	154.475		0.1	5	4.9709	4.92464	5.43706	14.0014	0.3	-0.233078	-0.279345	0.949		171	5	154.475		0.58	5	0.183531	0.221393	0.368414	0.310408	1.5	-0.0924414	-0.0545787	0.949
6A	172	5	155.475		0.32	5	2.00694	2.0689	1.71882	2.16684	0.8	0.144059	0.206026	0.95		172	5	155.475		0.07	5	4.97104	4.95958	5.36266	14.0163	0.2	-0.195814	-0.207269	0.95		172	5	155.475		0.56	5	0.179543	0.226582	0.362976	0.310638	1.4	-0.0917165	-0.0446771	0.95
6A	173	5	156.475		0.36	5	2.01541	2.06969	1.70358	2.16488	0.9	0.155917	0.21019	0.969		173	5	156.475		0.04	5	4.97138	5.00071	5.27507	14.0294	0.1	-0.151842	-0.12252	0.969		173	5	156.475		0.53	4	0.176755	0.231476	0.356382	0.310923	1.4	-0.0898132	-0.0350927	0.969
6A	174	5	157.338	SNP_980448	0.39	4	2.02351	2.06867	1.69211	2.16344	1	0.165702	0.210868	1		174	5	157.338	SNP_980448	0.02	4	4.97298	5.03424	5.20175	14.0366	0.1	-0.114384	-0.0531309	1		174	5	157.338	SNP_980448	0.5	4	0.175439	0.235294	0.35	0.311207	1.3	-0.0872807	-0.0274252	1
6A	175	5	158.338		0.38	5	1.9744	2.09002	1.70128	2.1634	1	0.136556	0.252185	0.971		175	5	158.338		0.02	4	4.97273	5.03171	5.20912	14.0362	0.1	-0.118196	-0.0592101	0.971		175	5	158.338		0.51	5	0.187814	0.222733	0.361275	0.311086	1.3	-0.0867305	-0.0518112	0.971
6A	176	5	159.338		0.37	5	1.93254	2.10009	1.71731	2.16359	1	0.107612	0.27517	0.978		176	5	159.338		0.02	4	4.97407	5.03073	5.21148	14.0364	0.1	-0.118706	-0.0620466	0.978		176	5	159.338		0.56	4	0.205211	0.209216	0.372149	0.310744	1.4	-0.0834694	-0.0794641	0.978
6A	177	5	159.953	SNP_3222531	0.36	4	1.91608	2.09804	1.73143	2.16489	0.9	0.0923249	0.27429	1		177	5	159.953	SNP_3222531	0.02	4	4.97569	5.03096	5.21	14.0367	0	-0.117157	-0.0618857	1		177	5	159.953	SNP_3222531	0.61	4	0.215686	0.202128	0.378378	0.310383	1.5	-0.0813461	-0.0949047	1
6A	178	5	160.953		0.4	6	1.90148	2.11376	1.72135	2.16114	1.1	0.090066	0.302338	0.957		178	5	160.953		0.02	4	4.98344	5.019	5.22838	14.0353	0.1	-0.122468	-0.0869097	0.957		178	5	160.953		0.55	5	0.224826	0.198368	0.373676	0.310576	1.5	-0.0744251	-0.100883	0.957
6A	179	5	161.953		0.42	6	1.89425	2.12448	1.71532	2.15855	1.2	0.0894674	0.319693	0.929		179	5	161.953		0.02	4	4.99008	5.00934	5.24126	14.0342	0.1	-0.125591	-0.106332	0.929		179	5	161.953		0.5	6	0.23398	0.195006	0.367008	0.310822	1.4	-0.0665141	-0.105488	0.929
6A	180	5	162.953		0.41	7	1.89712	2.12793	1.71385	2.15795	1.3	0.0916359	0.322446	0.915		180	5	162.953		0.03	5	4.99427	5.00357	5.24702	14.0335	0.1	-0.126371	-0.117076	0.915		180	5	162.953		0.44	6	0.242437	0.192625	0.358091	0.311156	1.3	-0.057827	-0.107639	0.915
6A	181	5	163.953		0.39	7	1.91111	2.12245	1.71779	2.15973	1.2	0.09666	0.307999	0.916		181	5	163.953		0.03	5	4.99521	5.00294	5.24466	14.0336	0.1	-0.124724	-0.11699	0.916		181	5	163.953		0.38	6	0.249654	0.191813	0.34662	0.311616	1.1	-0.048483	-0.106324	0.916
6A	182	5	164.953		0.34	6	1.93436	2.10789	1.72829	2.16351	1	0.103038	0.276561	0.931		182	5	164.953		0.02	4	4.99297	5.00778	5.23428	14.0345	0.1	-0.120656	-0.105842	0.931		182	5	164.953		0.32	6	0.255444	0.19296	0.33243	0.312214	0.9	-0.0384929	-0.100977	0.931
6A	183	5	165.953		0.28	5	1.96145	2.08637	1.74648	2.16824	0.8	0.107484	0.232406	0.961		183	5	165.953		0.02	4	4.98848	5.0174	5.21717	14.0359	0.1	-0.114347	-0.0854267	0.961		183	5	165.953		0.26	5	0.259943	0.196037	0.315917	0.312892	0.7	-0.0279867	-0.0918925	0.961
6A	184	5	166.863	SNP_1236521	0.23	4	1.98421	2.06354	1.77	2.17253	0.6	0.107105	0.186431	1		184	5	166.863	SNP_1236521	0.02	4	4.98351	5.02918	5.1975	14.0372	0	-0.106996	-0.0613279	1		184	5	166.863	SNP_1236521	0.21	4	0.263158	0.2	0.3	0.313476	0.5	-0.0184211	-0.0815789	1

## Sheet: C7
	48hai	Intervall (0.95)	3													72hai	Intervall (0.95)	2.9													Macro	Intervall (0.95)	2.9
Chromosome	Nr	Group	Position	Locus	LOD	# Iter.	mu_A	mu_H	mu_B	Variance	% Expl.	Additive	Dominance	GIC		Nr	Group	Position	Locus	LOD	# Iter.	mu_A	mu_H	mu_B	Variance	% Expl.	Additive	Dominance	GIC		Nr	Group	Position	Locus	LOD	# Iter.	mu_A	mu_H	mu_B	Variance	% Expl.	Additive	Dominance	GIC
7A	1	4	0	SNP_1220636	0.24	4	1.80172	1.98946	2.11406	2.17173	0.6	-0.156171	0.0315721	0.998		1	4	0	SNP_1220636	0.04	4	5.25337	4.97353	4.98857	14.029	0.1	0.132397	-0.147445	0.998		1	4	0	SNP_1220636	0.64	4	0.124729	0.272267	0.301361	0.31011	1.6	-0.0883161	0.0592219	0.998
7A	2	4	1		0.26	5	1.79586	1.98005	2.13131	2.17012	0.7	-0.167726	0.0164661	0.959		2	4	1		0	4	5.0972	5.06189	4.99525	14.0421	0	0.0509735	0.0156632	0.959		2	4	1		0.56	4	0.131023	0.265304	0.303844	0.310665	1.4	-0.086411	0.0478704	0.959
7A	3	4	2		0.28	5	1.79265	1.97051	2.14715	2.1687	0.8	-0.177249	0.000605691	0.938		3	4	2		0.03	6	4.86814	5.18055	4.99914	14.0267	0.1	-0.065502	0.246912	0.938		3	4	2		0.49	4	0.13847	0.258204	0.306381	0.311208	1.3	-0.0839554	0.0357785	0.938
7A	4	4	3		0.29	5	1.79195	1.96214	2.15967	2.16769	0.8	-0.183859	-0.0136709	0.936		4	4	3		0.15	7	4.61888	5.29367	5.00369	13.9697	0.5	-0.192405	0.482388	0.936		4	4	3		0.43	4	0.147099	0.251175	0.308769	0.311722	1.1	-0.0808349	0.0232409	0.936
7A	5	4	4		0.31	5	1.79352	1.95574	2.16774	2.16728	0.8	-0.187106	-0.0248862	0.952		5	4	4		0.32	6	4.43104	5.36317	5.0135	13.9055	1	-0.291229	0.640907	0.952		5	4	4		0.37	4	0.156841	0.244439	0.310786	0.312191	0.9	-0.0769727	0.0106249	0.952
7A	6	4	5		0.31	4	1.79714	1.95144	2.17112	2.16754	0.8	-0.18699	-0.0326907	0.987		6	4	5		0.49	5	4.31311	5.39319	5.02958	13.8606	1.3	-0.358238	0.72184	0.987		6	4	5		0.32	4	0.167519	0.238223	0.312221	0.312602	0.8	-0.072351	-0.00164744	0.987
7A	7	4	5.288	SNP_1377483	0.31	4	1.79854	1.95056	2.17128	2.16773	0.8	-0.18637	-0.034351	1		7	4	5.288	SNP_1377483	0.54	4	4.28951	5.39656	5.03521	13.8519	1.4	-0.372848	0.734199	1		7	4	5.288	SNP_1377483	0.31	4	0.170732	0.236559	0.3125	0.312709	0.8	-0.0708841	-0.00505671	1
7A	8	4	6.288		0.29	5	1.79506	1.9555	2.16272	2.16826	0.8	-0.183831	-0.0233944	0.949		8	4	6.288		0.61	6	4.16465	5.42587	5.08762	13.7952	1.8	-0.461485	0.799732	0.949		8	4	6.288		0.33	6	0.149953	0.250217	0.303485	0.312219	0.9	-0.0767662	0.0234977	0.949
7A	9	4	7.288		0.26	5	1.79372	1.96181	2.15024	2.16931	0.7	-0.178261	-0.0101745	0.91		9	4	7.288		0.67	7	4.05316	5.44753	5.14517	13.7379	2.2	-0.546006	0.848369	0.91		9	4	7.288		0.38	8	0.130307	0.263688	0.29468	0.311356	1.2	-0.0821864	0.0511948	0.91
7A	10	4	8.288		0.23	6	1.79491	1.96876	2.13499	2.17072	0.7	-0.170039	0.00380507	0.884		10	4	8.288		0.73	8	3.96955	5.45629	5.20723	13.6906	2.5	-0.618842	0.8679	0.884		10	4	8.288		0.43	8	0.117013	0.274539	0.286554	0.31053	1.5	-0.0847703	0.0727556	0.884
7A	11	4	9.288		0.21	6	1.79904	1.97541	2.11843	2.17234	0.6	-0.159695	0.0166786	0.871		11	4	9.288		0.76	8	3.92407	5.44833	5.27256	13.6626	2.7	-0.674244	0.850017	0.871		11	4	9.288		0.46	8	0.111014	0.281926	0.279716	0.310032	1.6	-0.0843512	0.0865611	0.871
7A	12	4	10.288		0.18	5	1.80645	1.98077	2.102	2.17405	0.5	-0.147775	0.0265482	0.871		12	4	10.288		0.77	8	3.92162	5.42164	5.3391	13.6588	2.7	-0.708738	0.791281	0.871		12	4	10.288		0.46	8	0.111625	0.285671	0.274588	0.309977	1.7	-0.0814813	0.0925646	0.871
7A	13	4	11.288		0.15	5	1.81739	1.98396	2.08683	2.1758	0.4	-0.134718	0.0318546	0.883		13	4	11.288		0.76	8	3.96344	5.37527	5.4041	13.6797	2.6	-0.720333	0.691495	0.883		13	4	11.288		0.42	8	0.118653	0.285432	0.271363	0.310421	1.5	-0.076355	0.0904237	0.883
7A	14	4	12.288		0.13	5	1.8319	1.98446	2.07353	2.17756	0.4	-0.120817	0.0317424	0.908		14	4	12.288		0.73	7	4.0458	5.31007	5.46428	13.7199	2.3	-0.709239	0.555033	0.908		14	4	12.288		0.36	8	0.13251	0.280589	0.270101	0.311359	1.2	-0.0687957	0.0792834	0.908
7A	15	4	13.288		0.1	4	1.84962	1.98211	2.06231	2.17926	0.3	-0.106343	0.0261467	0.946		15	4	13.288		0.7	6	4.15391	5.23227	5.51602	13.7668	2	-0.681056	0.397299	0.946		15	4	13.288		0.27	6	0.152552	0.271022	0.270683	0.312581	0.8	-0.0590651	0.059405	0.946
7A	16	4	14.288		0.08	4	1.86964	1.97727	2.05299	2.1808	0.2	-0.0916791	0.0159557	0.996		16	4	14.288		0.67	4	4.2637	5.15375	5.55665	13.8059	1.7	-0.646471	0.243579	0.996		16	4	14.288		0.19	4	0.174472	0.258705	0.27264	0.313626	0.5	-0.0490839	0.0351497	0.996
7A	17	4	14.31	SNP_3574880	0.08	4	1.87009	1.97714	2.05281	2.18083	0.2	-0.0913582	0.0156915	0.998		17	4	14.31	SNP_3574880	0.67	4	4.26597	5.15211	5.5574	13.8066	1.7	-0.645716	0.240421	0.998		17	4	14.31	SNP_3574880	0.19	4	0.174928	0.25843	0.272692	0.313644	0.5	-0.048882	0.0346194	0.998
7A	18	4	15.31		0.04	5	1.90105	1.9716	2.03665	2.18286	0.1	-0.0677998	0.00275008	0.936		18	4	15.31		0.65	5	4.26223	5.14475	5.57615	13.7986	1.7	-0.656957	0.225557	0.936		18	4	15.31		0.28	5	0.162347	0.254765	0.289288	0.312823	0.7	-0.0634704	0.0289478	0.936
7A	19	4	16.31		0.02	5	1.93347	1.96848	2.01506	2.18443	0	-0.0407941	-0.00578711	0.922		19	4	16.31		0.59	5	4.29369	5.13805	5.56577	13.8134	1.6	-0.636042	0.208323	0.922		19	4	16.31		0.4	5	0.151699	0.250135	0.305877	0.311832	1.1	-0.0770891	0.0213472	0.922
7A	20	4	17.31		0	4	1.96533	1.96689	1.99104	2.18524	0	-0.0128507	-0.0112959	0.957		20	4	17.31		0.51	5	4.36903	5.1272	5.52577	13.8526	1.4	-0.578366	0.179802	0.957		20	4	17.31		0.53	5	0.143221	0.245561	0.320606	0.310788	1.4	-0.0886926	0.013648	0.957
7A	21	4	17.862	SNP_3575210	0	3	1.98205	1.96598	1.9783	2.18532	0	0.00187507	-0.0142021	0.997		21	4	17.862	SNP_3575210	0.46	4	4.42847	5.11755	5.49387	13.8815	1.2	-0.532698	0.156386	0.997		21	4	17.862	SNP_3575210	0.61	5	0.139455	0.243372	0.327396	0.310242	1.6	-0.0939707	0.00994613	0.997
7A	22	4	18.862		0	4	1.96147	1.96856	1.9929	2.18522	0	-0.0157141	-0.0086298	0.954		22	4	18.862		0.51	6	4.30565	5.23516	5.42604	13.845	1.4	-0.560192	0.369312	0.954		22	4	18.862		0.63	6	0.129506	0.250325	0.327948	0.309764	1.7	-0.099221	0.021598	0.954
7A	23	4	19.862		0.01	4	1.93991	1.97123	2.00915	2.18473	0	-0.0346238	-0.00330018	0.935		23	4	19.862		0.59	6	4.21016	5.34183	5.33023	13.8031	1.7	-0.560032	0.571635	0.935		23	4	19.862		0.63	6	0.124561	0.254948	0.327067	0.309603	1.8	-0.101253	0.029134	0.935
7A	24	4	20.862		0.03	4	1.91832	1.97389	2.02652	2.18387	0.1	-0.0540995	0.00147088	0.941		24	4	20.862		0.67	6	4.1641	5.41741	5.22262	13.7732	1.9	-0.529257	0.724053	0.941		24	4	20.862		0.62	6	0.124765	0.257347	0.324766	0.309812	1.7	-0.1	0.0325816	0.941
7A	25	4	21.862		0.05	4	1.89769	1.97655	2.04413	2.1827	0.1	-0.0732202	0.0056428	0.971		25	4	21.862		0.75	5	4.16342	5.45734	5.12112	13.7636	2	-0.478853	0.81507	0.971		25	4	21.862		0.59	5	0.129229	0.258128	0.321007	0.310329	1.5	-0.0958891	0.0330095	0.971
7A	26	4	22.437	SNP_3575342	0.06	4	1.88659	1.97813	2.05395	2.18193	0.2	-0.0836813	0.00785967	1		26	4	22.437	SNP_3575342	0.78	4	4.17933	5.4657	5.06955	13.7678	2	-0.445106	0.84126	1		26	4	22.437	SNP_3575342	0.56	4	0.133333	0.258065	0.318182	0.310725	1.4	-0.0924242	0.0323069	1
7A	27	4	23.243	SNP_1107797	0.01	4	1.95644	1.96069	2.01565	2.18476	0	-0.0296039	-0.0253587	1		27	4	23.243	SNP_1107797	0.81	4	4.25913	5.54674	4.89064	13.7583	2	-0.315754	0.971857	1		27	4	23.243	SNP_1107797	0.38	4	0.152174	0.258427	0.297872	0.312202	0.9	-0.0728492	0.0334038	1
7A	28	4	24.243		0.02	4	1.96459	1.9499	2.03147	2.18424	0.1	-0.0334408	-0.0481303	0.957		28	4	24.243		0.68	5	4.26104	5.48078	4.99059	13.7936	1.8	-0.364778	0.854963	0.957		28	4	24.243		0.48	5	0.147746	0.247278	0.32482	0.311248	1.2	-0.0885368	0.0109949	0.957
7A	29	4	25.243		0.03	4	1.97352	1.93972	2.04804	2.18346	0.1	-0.0372573	-0.071063	0.943		29	4	25.243		0.55	5	4.28501	5.3958	5.10945	13.8364	1.5	-0.412222	0.698575	0.943		29	4	25.243		0.64	5	0.144356	0.23649	0.353183	0.309877	1.7	-0.104414	-0.0122796	0.943
7A	30	4	26.243		0.05	4	1.98189	1.93157	2.06355	2.18257	0.1	-0.0408317	-0.0911493	0.958		30	4	26.243		0.46	5	4.32808	5.30112	5.24321	13.8754	1.2	-0.457567	0.515471	0.958		30	4	26.243		0.83	5	0.14165	0.228059	0.378878	0.308367	2.2	-0.118614	-0.0322049	0.958
7A	31	4	27.199	SNP_1217618	0.06	4	1.98833	1.9266	2.07564	2.18184	0.2	-0.0436538	-0.105389	1		31	4	27.199	SNP_1217618	0.4	4	4.38233	5.21152	5.3765	13.9007	1	-0.497087	0.332102	1		31	4	27.199	SNP_1217618	1.04	4	0.139535	0.222222	0.4	0.306999	2.6	-0.130233	-0.0475452	1
7A	32	4	28.199		0.07	5	2.0308	1.91164	2.05775	2.18097	0.2	-0.0134707	-0.132633	0.961		32	4	28.199		0.62	5	4.23627	5.33581	5.32533	13.8145	1.6	-0.544529	0.555013	0.961		32	4	28.199		0.94	5	0.136021	0.231135	0.389569	0.307456	2.5	-0.126774	-0.0316605	0.961
7A	33	4	29.199		0.1	4	2.06208	1.89952	2.03847	2.17953	0.3	0.0118033	-0.150747	0.968		33	4	29.199		0.86	5	4.14405	5.44829	5.27185	13.7275	2.3	-0.563905	0.740344	0.968		33	4	29.199		0.83	5	0.134324	0.244092	0.369743	0.308412	2.1	-0.11771	-0.00794125	0.968
7A	34	4	29.892	SNP_2289821	0.12	4	2.0754	1.89461	2.02436	2.17878	0.3	0.0255205	-0.155273	1		34	4	29.892	SNP_2289821	1.03	4	4.11577	5.50956	5.239	13.682	2.6	-0.561615	0.832171	1		34	4	29.892	SNP_2289821	0.75	4	0.134615	0.255556	0.35	0.30923	1.9	-0.107692	0.0132479	1
7A	35	4	30.892		0.09	5	2.06653	1.90044	2.02419	2.17971	0.3	0.0211671	-0.144914	0.946		35	4	30.892		1.02	5	4.09338	5.53277	5.2114	13.6615	2.7	-0.559012	0.880382	0.946		35	4	30.892		0.72	6	0.133772	0.255703	0.349549	0.309212	1.9	-0.107888	0.0140429	0.946
7A	36	4	31.892		0.07	6	2.05149	1.90738	2.02902	2.18081	0.2	0.0112334	-0.132875	0.914		36	4	31.892		1	6	4.08821	5.54561	5.18115	13.6552	2.8	-0.546471	0.910923	0.914		36	4	31.892		0.67	7	0.133537	0.258214	0.343137	0.309473	1.8	-0.1048	0.0198768	0.914
7A	37	4	32.892		0.06	6	2.03419	1.91281	2.03959	2.18154	0.2	-0.00270001	-0.124072	0.902		37	4	32.892		0.96	6	4.10103	5.5469	5.1504	13.6642	2.7	-0.524685	0.921182	0.902		37	4	32.892		0.61	7	0.133871	0.263519	0.329803	0.309971	1.7	-0.0979659	0.0316821	0.902
7A	38	4	33.892		0.06	6	2.01883	1.9148	2.05508	2.18161	0.2	-0.0181217	-0.122151	0.911		38	4	33.892		0.91	6	4.13108	5.53688	5.12107	13.6873	2.5	-0.494998	0.910803	0.911		38	4	33.892		0.56	7	0.134859	0.270755	0.311161	0.310514	1.5	-0.0881512	0.0477451	0.911
7A	39	4	34.892		0.07	5	2.00739	1.9135	2.07287	2.18106	0.2	-0.0327408	-0.126636	0.94		39	4	34.892		0.85	5	4.17637	5.51675	5.09476	13.7217	2.3	-0.459192	0.881182	0.94		39	4	34.892		0.52	5	0.136691	0.277586	0.292109	0.31092	1.4	-0.077709	0.0631857	0.94
7A	40	4	35.892		0.09	4	1.99951	1.91074	2.08936	2.18024	0.2	-0.0449261	-0.133693	0.991		40	4	35.892		0.79	4	4.23389	5.4885	5.0723	13.7631	2	-0.419207	0.83541	0.991		40	4	35.892		0.5	4	0.139493	0.282146	0.276885	0.311208	1.3	-0.0686959	0.0739569	0.991
7A	41	4	36.043	SNP_1127178	0.09	4	1.99854	1.91033	2.09154	2.18011	0.2	-0.0464984	-0.13471	1		41	4	36.043	SNP_1127178	0.78	4	4.2434	5.4837	5.06925	13.7697	2	-0.412925	0.827371	1		41	4	36.043	SNP_1127178	0.5	4	0.14	0.282609	0.275	0.311248	1.2	-0.0675	0.0751087	1
7A	42	4	37.043		0.08	5	1.99235	1.91555	2.08719	2.18075	0.2	-0.0474209	-0.12422	0.951		42	4	37.043		0.69	5	4.25331	5.45838	5.12981	13.7819	1.9	-0.438248	0.766818	0.951		42	4	37.043		0.51	6	0.134168	0.285562	0.276881	0.310737	1.4	-0.0713562	0.0800374	0.951
7A	43	4	38.043		0.06	5	1.98374	1.92349	2.07963	2.18163	0.2	-0.047946	-0.108193	0.911		43	4	38.043		0.6	6	4.27521	5.4196	5.20499	13.8013	1.7	-0.46489	0.679498	0.911		43	4	38.043		0.53	6	0.129759	0.287832	0.278766	0.310312	1.5	-0.0745033	0.0835688	0.911
7A	44	4	39.043		0.04	6	1.97261	1.93446	2.06837	2.18266	0.1	-0.0478754	-0.0860337	0.881		44	4	39.043		0.53	6	4.30979	5.36645	5.29595	13.8251	1.6	-0.493077	0.563577	0.881		44	4	39.043		0.53	7	0.127036	0.289192	0.280799	0.310016	1.6	-0.0768813	0.0852745	0.881
7A	45	4	40.043		0.02	6	1.95919	1.94849	2.05312	2.18364	0.1	-0.0469688	-0.0576649	0.861		45	4	40.043		0.46	7	4.35679	5.2999	5.40109	13.8486	1.4	-0.522148	0.420958	0.861		45	4	40.043		0.53	8	0.126089	0.289509	0.283101	0.309871	1.7	-0.0785063	0.0849142	0.861
7A	46	4	41.043		0.02	5	1.94412	1.96513	2.03416	2.18431	0	-0.0450224	-0.024015	0.85		46	4	41.043		0.42	6	4.41466	5.22329	5.51486	13.8664	1.3	-0.550103	0.258533	0.85		46	4	41.043		0.52	8	0.126902	0.28874	0.285716	0.309885	1.7	-0.079407	0.08243	0.85
7A	47	4	42.043		0.01	5	1.92858	1.98324	2.01261	2.18443	0	-0.042014	0.0126471	0.848		47	4	42.043		0.4	6	4.47999	5.14282	5.62743	13.8748	1.2	-0.573718	0.0891065	0.848		47	4	42.043		0.51	8	0.129399	0.286933	0.288551	0.310049	1.6	-0.0795759	0.0779578	0.848
7A	48	4	43.043		0.02	6	1.91378	2.00147	1.99003	2.18389	0.1	-0.0381267	0.0495672	0.856		48	4	43.043		0.41	6	4.54845	5.065	5.72882	13.8737	1.2	-0.590186	-0.0736372	0.856		48	4	43.043		0.49	8	0.13346	0.284217	0.291395	0.310343	1.5	-0.0789677	0.0717892	0.856
7A	49	4	44.043		0.04	6	1.90093	2.01832	1.9683	2.18283	0.1	-0.0336845	0.0837068	0.873		49	4	44.043		0.43	6	4.61556	4.99508	5.81208	13.8662	1.3	-0.598261	-0.218741	0.873		49	4	44.043		0.46	7	0.138897	0.280786	0.293962	0.31074	1.4	-0.0775325	0.0643565	0.873
7A	50	4	45.043		0.06	6	1.89075	2.03281	1.94873	2.18147	0.2	-0.0289883	0.11307	0.899		50	4	45.043		0.47	6	4.6777	4.93607	5.87427	13.8562	1.3	-0.598282	-0.339914	0.899		50	4	45.043		0.43	7	0.145415	0.276916	0.295943	0.3112	1.3	-0.0752641	0.056237	0.899
7A	51	4	46.043		0.08	5	1.88348	2.04451	1.93191	2.1801	0.2	-0.024217	0.13681	0.935		51	4	46.043		0.51	5	4.73266	4.88904	5.91551	13.8474	1.4	-0.591421	-0.435041	0.935		51	4	46.043		0.4	6	0.152629	0.272893	0.297117	0.311686	1.1	-0.0722438	0.0480196	0.935
7A	52	4	47.043		0.11	4	1.87899	2.05345	1.91789	2.17889	0.3	-0.0194492	0.155016	0.981		52	4	47.043		0.56	4	4.7796	4.85367	5.9377	13.842	1.4	-0.579052	-0.504976	0.981		52	4	47.043		0.37	4	0.160106	0.268999	0.297375	0.312161	1	-0.0686346	0.040259	0.981
7A	53	4	47.368	SNP_3575161	0.12	4	1.87807	2.05581	1.91389	2.17855	0.3	-0.0179067	0.159828	0.997		53	4	47.368	SNP_3575161	0.57	4	4.79312	4.84452	5.94124	13.8412	1.4	-0.574061	-0.52266	0.997		53	4	47.368	SNP_3575161	0.36	4	0.162524	0.267799	0.297262	0.312309	0.9	-0.0673691	0.037906	0.997
7A	54	4	48.368		0.21	6	1.82867	2.08853	1.9033	2.17152	0.6	-0.0373127	0.222546	0.963		54	4	48.368		0.74	5	4.78079	4.78229	6.11451	13.7565	2	-0.666859	-0.665358	0.963		54	4	48.368		0.41	5	0.156401	0.266964	0.307344	0.311786	1.1	-0.0754712	0.0350915	0.963
7A	55	4	49.368		0.34	6	1.77788	2.12185	1.89179	2.16167	1.1	-0.056955	0.287011	0.941		55	4	49.368		0.9	6	4.76564	4.73816	6.24739	13.6808	2.6	-0.740875	-0.768352	0.941		55	4	49.368		0.45	5	0.152064	0.265186	0.317107	0.311328	1.2	-0.0825214	0.0306011	0.941
7A	56	4	50.368		0.49	6	1.73623	2.14961	1.88048	2.15147	1.6	-0.0721288	0.341254	0.932		56	4	50.368		1.03	6	4.74696	4.71484	6.33076	13.6278	3	-0.791901	-0.824017	0.932		56	4	50.368		0.49	5	0.14933	0.262887	0.325801	0.310952	1.3	-0.0882358	0.0253219	0.932
7A	57	4	51.368		0.64	6	1.70654	2.1702	1.87025	2.14284	1.9	-0.0818542	0.381804	0.937		57	4	51.368		1.14	6	4.72462	4.70877	6.37126	13.5987	3.2	-0.82332	-0.839165	0.937		57	4	51.368		0.53	5	0.147881	0.260495	0.332828	0.310668	1.4	-0.0924736	0.0201409	0.937
7A	58	4	52.368		0.78	5	1.6872	2.18446	1.86154	2.13641	2.2	-0.0871696	0.410096	0.954		58	4	52.368		1.21	5	4.69901	4.71607	6.37729	13.59	3.2	-0.839137	-0.822077	0.954		58	4	52.368		0.57	5	0.147441	0.258265	0.33795	0.310482	1.5	-0.0952546	0.0155699	0.954
7A	59	4	53.368		0.92	5	1.67661	2.19324	1.85456	2.13236	2.4	-0.0889761	0.427655	0.984		59	4	53.368		1.25	5	4.67105	4.73374	6.3558	13.5974	3.2	-0.842372	-0.779688	0.984		59	4	53.368		0.6	4	0.147805	0.256288	0.34124	0.310393	1.5	-0.0967173	0.0117658	0.984
7A	60	4	53.776	SNP_1032800	0.97	4	1.67462	2.19533	1.85222	2.13142	2.5	-0.0888034	0.431915	1		60	4	53.776	SNP_1032800	1.26	4	4.65926	4.74333	6.34053	13.6041	3.1	-0.840634	-0.756559	1		60	4	53.776	SNP_1032800	0.61	4	0.148148	0.255556	0.342105	0.310383	1.5	-0.0969786	0.0104288	1
7A	61	4	54.776		1.02	5	1.66132	2.20898	1.83423	2.12494	2.8	-0.0864524	0.461202	0.959		61	4	54.776		1.32	5	4.6595	4.71335	6.42483	13.5507	3.5	-0.882665	-0.828813	0.959		61	4	54.776		0.55	5	0.150584	0.255567	0.338698	0.310676	1.4	-0.0940574	0.0109259	0.959
7A	62	4	55.776		1.06	6	1.64966	2.2215	1.81608	2.11861	3.1	-0.083214	0.488626	0.925		62	4	55.776		1.38	6	4.661	4.6846	6.50694	13.4964	3.9	-0.92297	-0.899371	0.925		62	4	55.776		0.49	5	0.153473	0.255688	0.334323	0.311018	1.3	-0.0904252	0.01179	0.925
7A	63	4	56.776		1.1	6	1.64002	2.23231	1.79853	2.1128	3.3	-0.0792536	0.513031	0.898		63	4	56.776		1.44	7	4.6634	4.65865	6.58309	13.4442	4.3	-0.959848	-0.964593	0.898		63	4	56.776		0.43	6	0.156832	0.255953	0.328862	0.311404	1.2	-0.0860152	0.0131058	0.898
7A	64	4	57.776		1.14	7	1.63272	2.2409	1.78235	2.10787	3.5	-0.074812	0.533366	0.877		64	4	57.776		1.49	7	4.66621	4.6372	6.64905	13.3981	4.6	-0.991421	-1.02044	0.877		64	4	57.776		0.38	6	0.160672	0.256391	0.322219	0.311829	1.1	-0.0807736	0.014945	0.877
7A	65	4	58.776		1.16	7	1.62795	2.2468	1.76833	2.10418	3.7	-0.0701939	0.548656	0.863		65	4	58.776		1.52	8	4.66897	4.62172	6.70089	13.3623	4.9	-1.01596	-1.06321	0.863		65	4	58.776		0.32	6	0.165001	0.257004	0.314362	0.312278	0.9	-0.0746807	0.0173221	0.863
7A	66	4	59.776		1.18	7	1.62578	2.24967	1.7572	2.10201	3.8	-0.0657114	0.558182	0.856		66	4	59.776		1.54	8	4.6712	4.61359	6.73493	13.3405	5	-1.03186	-1.08947	0.856		66	4	59.776		0.27	6	0.169821	0.257752	0.305365	0.312734	0.8	-0.0677718	0.020159	0.856
7A	67	4	60.776		1.18	7	1.62621	2.24931	1.74955	2.10154	3.8	-0.0616719	0.561431	0.855		67	4	60.776		1.54	8	4.67263	4.61372	6.74855	13.3356	5	-1.03796	-1.09688	0.855		67	4	60.776		0.22	6	0.175132	0.258543	0.295445	0.313177	0.6	-0.0601566	0.0232544	0.855
7A	68	4	61.776		1.17	7	1.62916	2.24565	1.74589	2.10287	3.8	-0.0583613	0.558123	0.861		68	4	61.776		1.52	8	4.67319	4.62258	6.74011	13.349	4.9	-1.03346	-1.08407	0.861		68	4	61.776		0.17	6	0.18092	0.259237	0.28496	0.313588	0.5	-0.0520201	0.0262972	0.861
7A	69	4	62.776		1.15	7	1.63451	2.23877	1.74656	2.10593	3.6	-0.056027	0.548232	0.874		69	4	62.776		1.48	8	4.67305	4.6402	6.70906	13.3806	4.7	-1.01801	-1.05085	0.874		69	4	62.776		0.13	6	0.187147	0.259686	0.274342	0.31395	0.4	-0.0435976	0.0289409	0.874
7A	70	4	63.776		1.12	7	1.64202	2.2289	1.75171	2.11055	3.4	-0.0548447	0.53204	0.893		70	4	63.776		1.42	7	4.67261	4.666	6.6562	13.4283	4.4	-0.991791	-0.998404	0.893		70	4	63.776		0.1	6	0.193738	0.259781	0.263997	0.314256	0.3	-0.0351297	0.0309132	0.893
7A	71	4	64.776		1.08	6	1.65141	2.21649	1.76114	2.11638	3.2	-0.0548629	0.510215	0.919		71	4	64.776		1.35	7	4.6725	4.69858	6.58418	13.4881	4	-0.95584	-0.929761	0.919		71	4	64.776		0.08	5	0.20057	0.259487	0.25422	0.314503	0.2	-0.0268249	0.0320921	0.919
7A	72	4	65.776		1.03	5	1.66233	2.20216	1.77418	2.123	2.9	-0.0559275	0.483899	0.952		72	4	65.776		1.27	6	4.67335	4.73591	6.49717	13.5548	3.5	-0.911914	-0.849347	0.952		72	4	65.776		0.06	5	0.207484	0.258848	0.245163	0.314691	0.2	-0.0188391	0.0325241	0.952
7A	73	4	66.776		0.98	4	1.67438	2.18664	1.78976	2.1299	2.5	-0.0576895	0.454576	0.991		73	4	66.776		1.18	4	4.67575	4.77542	6.40084	13.6224	3	-0.862546	-0.762879	0.991		73	4	66.776		0.04	4	0.214317	0.257941	0.236887	0.314824	0.1	-0.011285	0.0323395	0.991
7A	74	4	66.98	SNP_1057738	0.97	4	1.67694	2.1834	1.79312	2.1313	2.5	-0.0580931	0.44837	1		74	4	66.98	SNP_1057738	1.16	4	4.67647	4.78351	6.38059	13.6359	2.9	-0.852059	-0.745024	1		74	4	66.98	SNP_1057738	0.04	4	0.215686	0.257732	0.235294	0.314845	0.1	-0.00980392	0.0322418	1
7A	75	4	67.98		0.89	5	1.68394	2.18243	1.79997	2.13292	2.4	-0.0580132	0.44047	0.966		75	4	67.98		1.09	5	4.68644	4.78173	6.36761	13.6427	2.9	-0.840586	-0.745302	0.966		75	4	67.98		0.07	4	0.212766	0.264651	0.221116	0.314584	0.2	-0.00417494	0.0477097	0.966
7A	76	4	68.98		0.79	5	1.69616	2.17585	1.81337	2.13697	2.2	-0.0586057	0.421085	0.951		76	4	68.98		0.98	5	4.69735	4.79459	6.31474	13.6735	2.6	-0.808695	-0.71146	0.951		76	4	68.98		0.12	5	0.209956	0.271706	0.206791	0.314188	0.3	0.00158283	0.0633331	0.951
7A	77	4	69.98		0.66	5	1.71669	2.16182	1.83396	2.14398	1.9	-0.0586315	0.386492	0.955		77	4	69.98		0.85	5	4.70887	4.82123	6.22534	13.7233	2.3	-0.758235	-0.645871	0.955		77	4	69.98		0.18	5	0.207319	0.278418	0.193438	0.313696	0.5	0.00694053	0.0780403	0.955
7A	78	4	70.98		0.53	5	1.74929	2.13854	1.8607	2.15397	1.4	-0.0557051	0.333538	0.979		78	4	70.98		0.71	5	4.7217	4.85878	6.10634	13.7841	1.8	-0.69232	-0.555234	0.979		78	4	70.98		0.25	4	0.204905	0.284392	0.181866	0.313166	0.6	0.0115196	0.091006	0.979
7A	79	4	71.522	SNP_2322877	0.45	4	1.77189	2.12237	1.87656	2.16	1.2	-0.0523379	0.298141	1		79	4	71.522	SNP_2322877	0.64	4	4.72963	4.88191	6.03353	13.8179	1.6	-0.65195	-0.499665	1		79	4	71.522	SNP_2322877	0.29	4	0.203704	0.287234	0.176471	0.312885	0.7	0.0136166	0.0971469	1
7A	80	4	72.522		0.45	5	1.78356	2.1312	1.83546	2.15822	1.2	-0.0259497	0.321697	0.947		80	4	72.522		0.58	5	4.75674	4.87169	6.01191	13.8279	1.5	-0.627583	-0.512636	0.947		80	4	72.522		0.33	5	0.2056	0.29194	0.16218	0.312297	0.9	0.0217097	0.108049	0.947
7A	81	4	73.522		0.45	6	1.79673	2.13919	1.79544	2.156	1.3	0.000644287	0.343106	0.908		81	4	73.522		0.52	5	4.78693	4.86518	5.97346	13.8441	1.4	-0.593268	-0.515013	0.908		81	4	73.522		0.37	6	0.208821	0.295362	0.149875	0.311766	1.1	0.0294727	0.116014	0.908
7A	82	4	74.522		0.45	7	1.81149	2.14466	1.76134	2.15405	1.4	0.0250763	0.358247	0.883		82	4	74.522		0.45	6	4.81858	4.86371	5.91737	13.8661	1.3	-0.549396	-0.504262	0.883		82	4	74.522		0.4	6	0.213483	0.297033	0.14039	0.311385	1.2	0.0365467	0.120096	0.883
7A	83	4	75.522		0.45	7	1.8279	2.14643	1.73645	2.15307	1.5	0.0457262	0.364251	0.871		83	4	75.522		0.37	6	4.84982	4.86847	5.8442	13.8928	1.1	-0.497189	-0.478542	0.871		83	4	75.522		0.42	6	0.219637	0.296815	0.133733	0.311195	1.3	0.0429516	0.12013	0.871
7A	84	4	76.522		0.45	7	1.84584	2.14419	1.72136	2.15341	1.5	0.062241	0.360592	0.873		84	4	76.522		0.3	6	4.87916	4.87992	5.75643	13.9223	0.9	-0.438636	-0.437869	0.873		84	4	76.522		0.43	6	0.227191	0.294815	0.12955	0.31118	1.3	0.0488203	0.116444	0.873
7A	85	4	77.522		0.44	6	1.86502	2.13835	1.71495	2.15497	1.4	0.0750389	0.348364	0.888		85	4	77.522		0.23	6	4.9058	4.89759	5.65831	13.9519	0.7	-0.376254	-0.384461	0.888		85	4	77.522		0.43	6	0.235854	0.291289	0.127508	0.311297	1.2	0.054173	0.109608	0.888
7A	86	4	78.522		0.43	6	1.88497	2.12961	1.71537	2.15743	1.3	0.0848022	0.329435	0.917		86	4	78.522		0.17	5	4.92971	4.92006	5.55518	13.979	0.5	-0.312734	-0.322389	0.917		86	4	78.522		0.42	5	0.245134	0.286578	0.127438	0.311497	1.2	0.0588478	0.100293	0.917
7A	87	4	79.522		0.42	5	1.90514	2.11878	1.7208	2.16038	1.1	0.0921676	0.305808	0.959		87	4	79.522		0.11	4	4.95137	4.94533	5.45246	14.0018	0.3	-0.250541	-0.256586	0.959		87	4	79.522		0.42	5	0.254451	0.28103	0.12933	0.311747	1.1	0.0625609	0.0891389	0.959
7A	88	4	80.187	SNP_3574233	0.41	4	1.91838	2.11084	1.72634	2.16242	1.1	0.0960217	0.28848	0.995		88	4	80.187	SNP_3574233	0.08	4	4.96482	4.9627	5.38661	14.014	0.2	-0.210899	-0.213018	0.995		88	4	80.187	SNP_3574233	0.41	4	0.260427	0.277004	0.131703	0.311931	1	0.0643617	0.0809387	0.995
7A	89	4	81.187		0.45	5	1.8814	2.12513	1.72203	2.15862	1.2	0.0796887	0.323417	0.964		89	4	81.187		0.16	4	5.04169	4.87731	5.51165	13.9858	0.4	-0.234979	-0.399366	0.964		89	4	81.187		0.36	4	0.256837	0.274803	0.13664	0.312335	0.9	0.0600986	0.0780643	0.964
7A	90	4	82.187		0.48	5	1.84637	2.13074	1.73619	2.1571	1.3	0.0550894	0.339456	0.972		90	4	82.187		0.26	4	5.1187	4.80417	5.62731	13.9469	0.7	-0.254306	-0.568833	0.972		90	4	82.187		0.3	4	0.253426	0.272042	0.142634	0.312769	0.8	0.0553958	0.0740122	0.972
7A	91	4	82.822	SNP_1093098	0.5	4	1.82567	2.12953	1.75667	2.15753	1.3	0.0344967	0.338356	0.998		91	4	82.822	SNP_1093098	0.34	4	5.16266	4.76848	5.68604	13.9225	0.9	-0.26169	-0.655872	0.998		91	4	82.822	SNP_1093098	0.27	4	0.251364	0.270044	0.147052	0.313054	0.7	0.0521556	0.070836	0.998
7A	92	4	83.822		0.42	6	1.83393	2.12772	1.76241	2.15881	1.2	0.0357609	0.329551	0.942		92	4	83.822		0.42	5	5.19448	4.70952	5.77155	13.8765	1.2	-0.288534	-0.773489	0.942		92	4	83.822		0.33	5	0.247194	0.277524	0.137875	0.312405	0.9	0.0546596	0.0849892	0.942
7A	93	4	84.822		0.34	6	1.84337	2.11855	1.78563	2.16266	1	0.0288726	0.304053	0.92		93	4	84.822		0.45	6	5.21693	4.67712	5.78774	13.855	1.3	-0.285405	-0.82522	0.92		93	4	84.822		0.41	5	0.242509	0.284938	0.130866	0.311736	1.1	0.0558211	0.0982509	0.92
7A	94	4	85.822		0.24	6	1.8539	2.09943	1.83088	2.16903	0.7	0.0115083	0.257034	0.93		94	4	85.822		0.44	6	5.22743	4.67506	5.73616	13.8654	1.3	-0.254366	-0.806735	0.93		94	4	85.822		0.48	5	0.237574	0.291857	0.126443	0.311118	1.3	0.0555656	0.109849	0.93
7A	95	4	86.822		0.16	5	1.86493	2.07275	1.88947	2.17557	0.4	-0.012267	0.195549	0.973		95	4	86.822		0.39	5	5.22475	4.69845	5.64035	13.8979	1	-0.207799	-0.734109	0.973		95	4	86.822		0.56	4	0.232699	0.297872	0.124817	0.310623	1.4	0.0539414	0.119114	0.973
7A	96	4	87.236	SNP_3574746	0.14	4	1.86941	2.06193	1.91154	2.17756	0.4	-0.0210633	0.171457	1		96	4	87.236	SNP_3574746	0.37	4	5.21981	4.71367	5.5945	13.9143	0.9	-0.187346	-0.693487	1		96	4	87.236	SNP_3574746	0.59	4	0.230769	0.3	0.125	0.310471	1.5	0.0528846	0.122115	1
7A	97	4	88.236		0.16	6	1.86939	2.07243	1.8722	2.17519	0.5	-0.00140861	0.201639	0.961		97	4	88.236		0.41	5	5.21873	4.69778	5.71574	13.8825	1.1	-0.248501	-0.769452	0.961		97	4	88.236		0.36	5	0.229649	0.286763	0.146019	0.312234	0.9	0.0418146	0.0989292	0.961
7A	98	4	89.215	SNP_1104923	0.14	4	1.87196	2.05745	1.89303	2.1775	0.4	-0.0105348	0.174951	1		98	4	89.215	SNP_1104923	0.38	4	5.20827	4.73979	5.69382	13.9083	1	-0.242777	-0.711255	1		98	4	89.215	SNP_1104923	0.16	4	0.230769	0.270833	0.176471	0.313903	0.4	0.0271493	0.0672134	1
7A	99	4	90.215		0.09	4	1.88567	2.04225	1.91261	2.17999	0.2	-0.0134707	0.143103	0.959		99	4	90.215		0.25	5	5.24376	4.76992	5.55986	13.9428	0.7	-0.158048	-0.63189	0.959		99	4	90.215		0.16	5	0.226397	0.272831	0.17665	0.313808	0.4	0.0248731	0.0713078	0.959
7A	100	4	91.215		0.06	5	1.8998	2.02813	1.92974	2.1819	0.2	-0.0149667	0.113366	0.935		100	4	91.215		0.14	6	5.27025	4.8198	5.38336	13.981	0.4	-0.0565538	-0.507007	0.935		100	4	91.215		0.17	6	0.222171	0.274925	0.176428	0.313686	0.5	0.0228714	0.0756253	0.935
7A	101	4	92.215		0.03	5	1.91299	2.01636	1.94266	2.18319	0.1	-0.0148335	0.0885295	0.926		101	4	92.215		0.07	6	5.28774	4.88922	5.16397	14.0116	0.2	0.0618849	-0.336633	0.926		101	4	92.215		0.18	6	0.218899	0.276745	0.175791	0.313562	0.5	0.021554	0.0794001	0.926
7A	102	4	93.215		0.02	5	1.92411	2.00769	1.95052	2.18397	0.1	-0.0132048	0.0703715	0.933		102	4	93.215		0.06	5	5.29815	4.96701	4.93052	14.0202	0.2	0.183818	-0.147325	0.933		102	4	93.215		0.19	6	0.217302	0.277972	0.174751	0.313463	0.5	0.0212752	0.0819449	0.933
7A	103	4	94.215		0.02	4	1.93242	2.00245	1.95318	2.18438	0	-0.0103773	0.0596487	0.956		103	4	94.215		0.1	5	5.30515	5.03572	4.72956	14.0061	0.3	0.287796	0.0183583	0.956		103	4	94.215		0.21	6	0.21766	0.278481	0.173344	0.313407	0.6	0.0221583	0.082979	0.956
7A	104	4	95.215		0.01	4	1.93777	2.00055	1.95105	2.18453	0	-0.00664013	0.0561415	0.995		104	4	95.215		0.17	4	5.31168	5.08851	4.57841	13.9813	0.4	0.366633	0.143466	0.995		104	4	95.215		0.22	4	0.219714	0.278385	0.171621	0.313385	0.6	0.0240466	0.0827174	0.995
7A	105	4	95.318	SNP_1232128	0.01	4	1.93816	2.00053	1.95059	2.18454	0	-0.00621248	0.0561506	1		105	4	95.318	SNP_1232128	0.18	4	5.3124	5.09309	4.56543	13.9785	0.5	0.373486	0.154178	1		105	4	95.318	SNP_1232128	0.23	4	0.22	0.278351	0.171429	0.313384	0.6	0.0242857	0.0826362	1
7A	106	4	96.318		0.12	5	1.9815	1.90882	2.13236	2.17793	0.3	-0.0754297	-0.148108	0.985		106	4	96.318		0.05	4	5.27481	4.94458	5.04492	14.0246	0.1	0.114946	-0.215285	0.985		106	4	96.318		0.07	5	0.21361	0.26403	0.220748	0.314618	0.2	-0.00356893	0.0468517	0.985
7A	107	4	96.493	SNP_3574220	0.16	4	1.98935	1.89916	2.14622	2.17616	0.4	-0.0784342	-0.168624	1		107	4	96.493	SNP_3574220	0.06	4	5.26426	4.92115	5.11769	14.022	0.2	0.0732815	-0.269828	1		107	4	96.493	SNP_3574220	0.05	4	0.212766	0.260417	0.230769	0.314753	0.1	-0.00900164	0.0386491	1
7A	108	4	97.493		0.17	5	2.02255	1.88658	2.13656	2.17507	0.5	-0.0570016	-0.192974	0.951		108	4	97.493		0.07	4	5.31473	5.00559	4.8608	14.0172	0.2	0.226968	-0.0821731	0.951		108	4	97.493		0.07	6	0.218524	0.264908	0.211894	0.314565	0.2	0.00331522	0.0496988	0.951
7A	109	4	98.493		0.15	5	2.04607	1.88825	2.10288	2.17653	0.4	-0.0284044	-0.186226	0.955		109	4	98.493		0.19	4	5.35236	5.10306	4.59391	13.9737	0.5	0.379228	0.129925	0.955		109	4	98.493		0.09	6	0.223629	0.268292	0.197745	0.314296	0.3	0.0129421	0.0576057	0.955
7A	110	4	99.34	SNP_985161	0.11	4	2.05814	1.89979	2.059	2.1791	0.3	-0.000430233	-0.15878	1		110	4	99.34	SNP_985161	0.36	4	5.37523	5.17804	4.40634	13.916	0.9	0.484443	0.287257	1		110	4	99.34	SNP_985161	0.11	4	0.227273	0.268041	0.195122	0.31427	0.3	0.0160754	0.0568439	1
7A	111	4	100.34		0.23	4	2.07158	1.86103	2.11336	2.17184	0.6	-0.0208893	-0.231439	0.977		111	4	100.34		0.23	4	5.03333	5.28456	4.57193	13.961	0.6	0.230701	0.481929	0.977		111	4	100.34		0.06	4	0.219153	0.262815	0.220412	0.314716	0.1	-0.000629481	0.0430322	0.977
7A	112	4	100.592	SNP_3574962	0.27	4	2.07222	1.85411	2.1214	2.17042	0.7	-0.0245883	-0.242704	1		112	4	100.592	SNP_3574962	0.22	4	4.96501	5.30204	4.61958	13.9649	0.6	0.172719	0.509748	1		112	4	100.592	SNP_3574962	0.05	4	0.21739	0.260873	0.227266	0.314794	0.1	-0.0049382	0.0385451	1
7A	113	4	101.592		0.07	4	2.06375	1.91404	2.00559	2.18122	0.2	0.0290777	-0.120629	0.996		113	4	101.592		0.28	4	4.91125	5.33996	4.57208	13.9429	0.7	0.169585	0.598297	0.996		113	4	101.592		0.21	4	0.254102	0.268804	0.16816	0.313515	0.5	0.0429712	0.0576729	0.996
7A	114	4	101.623	SNP_1032898	0.07	4	2.06306	1.91626	2.00146	2.18144	0.2	0.0307998	-0.116007	1		114	4	101.623	SNP_1032898	0.28	4	4.91096	5.3394	4.57288	13.9433	0.7	0.169041	0.59748	1		114	4	101.623	SNP_1032898	0.22	4	0.255323	0.268816	0.166665	0.313456	0.5	0.044329	0.0578222	1
7A	115	4	102.623		0.19	5	2.1004	1.87065	2.07992	2.17331	0.6	0.0102362	-0.219509	0.956		115	4	102.623		0.32	5	5.17707	5.26817	4.43543	13.9263	0.8	0.370821	0.461922	0.956		115	4	102.623		0.19	6	0.234333	0.274075	0.17613	0.313604	0.5	0.0291019	0.0688438	0.956
7A	116	4	103.392	SNP_1128780	0.3	4	2.11487	1.85567	2.11571	2.16865	0.8	-0.000421245	-0.259623	1		116	4	103.392	SNP_1128780	0.42	4	5.4255	5.19152	4.38279	13.8966	1	0.521355	0.28737	1		116	4	103.392	SNP_1128780	0.17	4	0.225	0.272727	0.186047	0.313863	0.4	0.0194767	0.067204	1
7A	117	4	104.392		0.26	4	2.10657	1.85674	2.10534	2.1699	0.7	0.000618465	-0.249212	0.956		117	4	104.392		0.4	5	5.33103	5.24451	4.37136	13.8935	1.1	0.479839	0.393315	0.956		117	4	104.392		0.12	5	0.216196	0.271702	0.200752	0.314148	0.3	0.00772209	0.0632279	0.956
7A	118	4	105.392		0.2	4	2.08876	1.86823	2.07996	2.1737	0.5	0.0043998	-0.216132	0.962		118	4	105.392		0.38	5	5.22003	5.2953	4.39755	13.8991	1	0.411242	0.486509	0.962		118	4	105.392		0.09	5	0.206989	0.268928	0.219676	0.314392	0.2	-0.00634359	0.0555954	0.962
7A	119	4	106.147	SNP_3575170	0.14	4	2.06964	1.88352	2.05491	2.17737	0.4	0.00736746	-0.178753	1		119	4	106.147	SNP_3575170	0.38	4	5.13541	5.32754	4.444	13.9089	1	0.345703	0.537838	1		119	4	106.147	SNP_3575170	0.09	4	0.200006	0.266663	0.234042	0.314426	0.2	-0.0170181	0.0496389	1
7A	120	4	107.147		0.13	5	2.06663	1.88468	2.06338	2.17725	0.4	0.00162336	-0.180323	0.935		120	4	107.147		0.27	6	5.12622	5.29238	4.49861	13.9358	0.8	0.313804	0.479966	0.935		120	4	107.147		0.08	6	0.215593	0.269162	0.212151	0.314413	0.2	0.00172115	0.0552903	0.935
7A	121	4	108.147		0.08	5	2.04171	1.90449	2.05006	2.18036	0.2	-0.00417531	-0.141399	0.94		121	4	108.147		0.18	6	5.08998	5.25954	4.59094	13.9683	0.5	0.249521	0.41908	0.94		121	4	108.147		0.12	5	0.234817	0.27014	0.19064	0.314105	0.3	0.0220888	0.0574111	0.94
7A	122	4	108.97	SNP_2307566	0.03	4	2.00835	1.93252	2.02465	2.18357	0.1	-0.00814931	-0.0839762	0.997		122	4	108.97	SNP_2307566	0.13	4	5.04086	5.23179	4.69618	13.9955	0.3	0.172341	0.363269	0.997		122	4	108.97	SNP_2307566	0.19	4	0.249996	0.270082	0.176076	0.313678	0.5	0.0369603	0.0570462	0.997
7A	123	4	109.97		0.05	4	2.04193	1.92341	2.00961	2.18263	0.1	0.0161576	-0.102355	0.943		123	4	109.97		0.14	5	5.04497	5.2386	4.68027	13.9915	0.4	0.182352	0.375979	0.943		123	4	109.97		0.09	5	0.246042	0.262716	0.194922	0.314406	0.2	0.0255598	0.0422341	0.943
7A	124	4	110.97		0.07	4	2.07417	1.91504	1.99342	2.18104	0.2	0.0403755	-0.11875	0.927		124	4	110.97		0.13	5	5.05396	5.2353	4.67906	13.9921	0.4	0.18745	0.36879	0.927		124	4	110.97		0.02	5	0.24367	0.251843	0.21939	0.315003	0.1	0.0121403	0.0203127	0.927
7A	125	4	111.97		0.11	4	2.10322	1.9082	1.97633	2.17902	0.3	0.0634427	-0.13157	0.948		125	4	111.97		0.12	5	5.06733	5.22127	4.69401	13.9974	0.3	0.186662	0.340604	0.948		125	4	111.97		0	4	0.241764	0.239773	0.24577	0.315173	0	-0.00200287	-0.00399376	0.948
7A	126	4	112.884	SNP_3574678	0.15	4	2.12586	1.90369	1.96027	2.17703	0.4	0.082795	-0.13937	1		126	4	112.884	SNP_3574678	0.11	4	5.08125	5.20132	4.71953	14.0049	0.3	0.180862	0.300924	1		126	4	112.884	SNP_3574678	0.03	4	0.239211	0.230719	0.266691	0.314963	0.1	-0.0137402	-0.0222319	1
7A	127	4	113.884		0.13	5	2.12035	1.90927	1.95322	2.17768	0.4	0.083564	-0.127517	0.946		127	4	113.884		0.14	5	5.03814	5.23764	4.67893	13.9926	0.4	0.179607	0.379105	0.946		127	4	113.884		0.03	5	0.242264	0.22979	0.266184	0.314963	0.1	-0.0119597	-0.024434	0.946
7A	128	4	114.884		0.11	5	2.11305	1.91475	1.94733	2.17842	0.3	0.0828614	-0.115441	0.918		128	4	114.884		0.17	5	4.99633	5.27016	4.64569	13.9797	0.5	0.175316	0.449147	0.918		128	4	114.884		0.02	6	0.244168	0.230122	0.264007	0.314993	0.1	-0.00991948	-0.0239655	0.918
7A	129	4	115.884		0.1	5	2.10407	1.91947	1.94429	2.17921	0.3	0.0798884	-0.104712	0.914		129	4	115.884		0.19	5	4.96315	5.29536	4.62093	13.9685	0.5	0.171109	0.50332	0.914		129	4	115.884		0.01	6	0.244127	0.232195	0.259947	0.315055	0	-0.00790979	-0.0198419	0.914
7A	130	4	116.884		0.09	5	2.09339	1.92343	1.94463	2.18006	0.2	0.074384	-0.0955752	0.934		130	4	116.884		0.22	5	4.94425	5.31077	4.60463	13.9611	0.6	0.169807	0.536332	0.934		130	4	116.884		0.01	5	0.242522	0.235729	0.254229	0.315125	0	-0.00585354	-0.0126463	0.934
7A	131	4	117.884		0.08	4	2.08125	1.92684	1.94803	2.18096	0.2	0.0666115	-0.0878001	0.98		131	4	117.884		0.23	4	4.94143	5.31556	4.59639	13.9587	0.6	0.172518	0.546648	0.98		131	4	117.884		0	3	0.24058	0.239808	0.247556	0.315169	0	-0.00348778	-0.00425991	0.98
7A	132	4	118.167	SNP_3575237	0.07	4	2.07763	1.92772	1.94947	2.18121	0.2	0.0640765	-0.0858261	0.997		132	4	118.167	SNP_3575237	0.24	4	4.94336	5.31506	4.59548	13.959	0.6	0.173938	0.545638	0.997		132	4	118.167	SNP_3575237	0	3	0.240118	0.24094	0.245607	0.315175	0	-0.00274483	-0.00192252	0.997
7A	133	4	119.167		0.09	5	2.09376	1.919	1.9523	2.17986	0.3	0.0707254	-0.104031	0.937		133	4	119.167		0.23	5	4.8979	5.33344	4.61054	13.9532	0.6	0.14368	0.579226	0.937		133	4	119.167		0	4	0.240431	0.239887	0.24752	0.31517	0	-0.00354463	-0.00408864	0.937
7A	134	4	120.167		0.1	6	2.11138	1.9095	1.95547	2.17816	0.3	0.0779571	-0.123921	0.886		134	4	120.167		0.23	6	4.84872	5.35245	4.62783	13.9458	0.7	0.110445	0.614179	0.886		134	4	120.167		0	5	0.241586	0.238073	0.250106	0.315157	0	-0.00425976	-0.00777363	0.886
7A	135	4	121.167		0.12	7	2.12968	1.8997	1.95881	2.17615	0.4	0.0854312	-0.144541	0.844		135	4	121.167		0.24	6	4.79671	5.37163	4.64739	13.9369	0.8	0.0746569	0.649581	0.844		135	4	121.167		0.01	6	0.243914	0.23529	0.253445	0.315125	0	-0.00476579	-0.013389	0.844
7A	136	4	122.167		0.13	8	2.14729	1.89033	1.96208	2.174	0.5	0.0926038	-0.164354	0.81		136	4	122.167		0.25	7	4.74298	5.39045	4.66917	13.9265	0.8	0.0369047	0.684378	0.81		136	4	122.167		0.01	8	0.247683	0.231362	0.257602	0.315057	0	-0.00495956	-0.0212804	0.81
7A	137	4	123.167		0.14	9	2.16257	1.88229	1.96494	2.17198	0.6	0.0988139	-0.181463	0.785		137	4	123.167		0.26	7	4.68905	5.40817	4.6932	13.915	0.9	-0.00207712	0.717048	0.785		137	4	123.167		0.02	9	0.252905	0.226255	0.26259	0.314923	0.1	-0.00484246	-0.0314917	0.785
7A	138	4	124.167		0.15	9	2.17388	1.87647	1.96702	2.17042	0.7	0.103431	-0.193987	0.768		138	4	124.167		0.28	7	4.63641	5.42416	4.71942	13.9032	1	-0.0415059	0.746246	0.768		138	4	124.167		0.04	10	0.259257	0.220124	0.268339	0.314695	0.2	-0.00454109	-0.0436748	0.768
7A	139	4	125.167		0.16	10	2.18029	1.87333	1.9681	2.16957	0.7	0.106097	-0.200865	0.76		139	4	125.167		0.3	8	4.58639	5.43791	4.74762	13.8915	1.1	-0.0806128	0.770905	0.76		139	4	125.167		0.06	10	0.266021	0.213371	0.274652	0.314361	0.3	-0.0043152	-0.0569657	0.76
7A	140	4	126.167		0.16	9	2.1812	1.87323	1.96798	2.16957	0.7	0.106608	-0.201361	0.761		140	4	126.167		0.32	8	4.54039	5.44881	4.7778	13.8808	1.2	-0.118706	0.789722	0.761		140	4	126.167		0.09	10	0.2724	0.206499	0.281195	0.313935	0.4	-0.00439714	-0.0702981	0.761
7A	141	4	127.167		0.16	9	2.17704	1.8759	1.96677	2.17036	0.7	0.105137	-0.196003	0.77		141	4	127.167		0.35	8	4.49921	5.45666	4.80964	13.8715	1.2	-0.155216	0.802233	0.77		141	4	127.167		0.13	10	0.277807	0.199973	0.287522	0.313456	0.5	-0.00485753	-0.0826914	0.77
7A	142	4	128.167		0.15	9	2.16849	1.88102	1.9646	2.17175	0.6	0.101945	-0.185527	0.787		142	4	128.167		0.37	7	4.46348	5.4613	4.84287	13.8642	1.3	-0.189697	0.808123	0.787		142	4	128.167		0.17	9	0.282011	0.194123	0.293143	0.312975	0.7	-0.00556576	-0.0934542	0.787
7A	143	4	129.167		0.14	8	2.1566	1.88802	1.96174	2.17352	0.5	0.0974283	-0.171143	0.814		143	4	129.167		0.4	7	4.43338	5.46291	4.87696	13.8589	1.3	-0.22179	0.807742	0.814		143	4	129.167		0.22	8	0.285078	0.189129	0.297639	0.312537	0.8	-0.00628046	-0.10223	0.814
7A	144	4	130.167		0.13	7	2.14263	1.89622	1.95853	2.1754	0.5	0.0920518	-0.154356	0.849		144	4	130.167		0.44	6	4.40905	5.46158	4.91155	13.8557	1.3	-0.251246	0.80128	0.849		144	4	130.167		0.28	7	0.287158	0.185083	0.300747	0.312179	1	-0.00679485	-0.10887	0.849
7A	145	4	131.167		0.12	6	2.12776	1.90496	1.95528	2.17719	0.4	0.0862405	-0.136554	0.892		145	4	131.167		0.47	6	4.39031	5.45766	4.94603	13.8545	1.3	-0.27786	0.789496	0.892		145	4	131.167		0.33	6	0.288401	0.181998	0.302395	0.311923	1	-0.00699715	-0.113399	0.892
7A	146	4	132.167		0.11	5	2.11293	1.9137	1.95224	2.17878	0.3	0.0803417	-0.118879	0.945		146	4	132.167		0.5	5	4.37693	5.45143	4.97996	13.855	1.3	-0.301514	0.772984	0.945		146	4	132.167		0.39	5	0.288934	0.179828	0.302672	0.311777	1.1	-0.00686902	-0.115974	0.945
7A	147	4	133.079	SNP_1409459	0.1	4	2.1	1.92134	1.94981	2.18	0.2	0.0750962	-0.103562	1		147	4	133.079	SNP_1409459	0.53	4	4.36911	5.44405	5.01	13.8569	1.3	-0.320444	0.754492	1		147	4	133.079	SNP_1409459	0.43	4	0.288889	0.178571	0.301887	0.311735	1.1	-0.00649895	-0.116816	1
7A	148	4	134.079		0.11	4	2.11364	1.91451	1.95664	2.17894	0.3	0.0785004	-0.120625	0.968		148	4	134.079		0.45	4	4.39527	5.40811	5.00125	13.8789	1.2	-0.302991	0.709846	0.968		148	4	134.079		0.6	5	0.309261	0.169365	0.308679	0.310315	1.5	0.000291144	-0.139605	0.968
7A	149	4	135.079		0.12	4	2.12378	1.91048	1.96376	2.17818	0.3	0.0800075	-0.133285	0.966		149	4	135.079		0.37	4	4.44168	5.36183	4.99868	13.9091	1	-0.278498	0.641649	0.966		149	4	135.079		0.78	5	0.329264	0.162426	0.314626	0.308839	2	0.0073192	-0.159519	0.966
7A	150	4	136.079		0.13	4	2.12815	1.90993	1.97089	2.178	0.3	0.0786329	-0.13959	0.994		150	4	136.079		0.28	4	4.50741	5.30883	5.00099	13.9431	0.7	-0.246791	0.554633	0.994		150	4	136.079		0.97	4	0.347872	0.158209	0.318814	0.307525	2.4	0.0145289	-0.175134	0.994
7A	151	4	136.2	SNP_3575290	0.13	4	2.12821	1.91011	1.97174	2.17803	0.3	0.078233	-0.139865	1		151	4	136.2	SNP_3575290	0.27	4	4.5165	5.30221	5.00149	13.9472	0.7	-0.242495	0.543216	1		151	4	136.2	SNP_3575290	0.99	4	0.35	0.157895	0.319149	0.307387	2.5	0.0154255	-0.17668	1
7A	152	4	137.2		0.1	4	2.06792	1.99241	1.85877	2.17977	0.3	0.104578	0.0290638	0.985		152	4	137.2		0.59	4	4.20687	5.37855	5.11433	13.8306	1.5	-0.453729	0.717946	0.985		152	4	137.2		0.75	4	0.331669	0.166997	0.314074	0.309137	1.9	0.00879759	-0.155874	0.985
7A	153	4	137.43	SNP_1070325	0.12	4	2.05359	2.00967	1.83745	2.1784	0.3	0.108071	0.0641556	1		153	4	137.43	SNP_1070325	0.66	4	4.164	5.38415	5.14104	13.8112	1.7	-0.488521	0.731628	1		153	4	137.43	SNP_1070325	0.69	4	0.325	0.170213	0.3125	0.309693	1.7	0.00625	-0.148537	1
7A	154	4	137.823	SNP_3574775	0.06	4	2.079	1.94121	1.94745	2.18216	0.1	0.0657766	-0.0720146	1		154	4	137.823	SNP_3574775	0.49	4	4.33073	5.38075	5.03063	13.8711	1.2	-0.349947	0.700074	1		154	4	137.823	SNP_3574775	0.64	4	0.317073	0.172043	0.3125	0.310098	1.6	0.00228659	-0.142744	1
7A	155	4	138.823		0.19	4	2.12367	1.87765	2.03054	2.17465	0.5	0.0465671	-0.199451	0.994		155	4	138.823		0.55	4	4.34634	5.44136	4.90878	13.8463	1.4	-0.281219	0.813802	0.994		155	4	138.823		0.67	5	0.31645	0.168957	0.318706	0.309654	1.8	-0.00112768	-0.148621	0.994
7A	156	4	138.929	SNP_1407518	0.21	4	2.12756	1.87187	2.03848	2.17353	0.5	0.0445414	-0.211151	1		156	4	138.929	SNP_1407518	0.56	4	4.35619	5.44376	4.89809	13.8473	1.4	-0.270947	0.816626	1		156	4	138.929	SNP_1407518	0.64	4	0.309524	0.172043	0.319149	0.310089	1.6	-0.00481256	-0.142293	1
7A	157	4	139.463	SNP_1407735	0.21	4	2.13333	1.86989	2.02163	2.17346	0.5	0.0558503	-0.207598	1		157	4	139.463	SNP_1407735	0.36	4	4.47349	5.36708	4.9882	13.9149	0.9	-0.257356	0.636234	1		157	4	139.463	SNP_1407735	1.13	4	0.348837	0.146067	0.32	0.306311	2.8	0.0144186	-0.188351	1
7A	158	4	140.463		0.23	5	2.13705	1.86041	2.03661	2.17169	0.6	0.0502218	-0.226424	0.975		158	4	140.463		0.41	5	4.52999	5.4368	4.81043	13.8906	1.1	-0.140222	0.766594	0.975		158	4	140.463		1.16	4	0.349544	0.144722	0.324566	0.305937	2.9	0.012489	-0.192333	0.975
7A	159	4	141.463		0.24	4	2.14059	1.8617	2.03307	2.17165	0.6	0.0537598	-0.22513	0.993		159	4	141.463		0.45	4	4.59769	5.45578	4.7102	13.8828	1.1	-0.0562529	0.801838	0.993		159	4	141.463		1.19	4	0.349047	0.144397	0.326483	0.30584	3	0.0112818	-0.193369	0.993
7A	160	4	141.637	SNP_3574192	0.24	4	2.14119	1.86284	2.03083	2.1718	0.6	0.0551786	-0.223171	1		160	4	141.637	SNP_3574192	0.45	4	4.6107	5.45411	4.7002	13.8843	1.1	-0.0447532	0.79866	1		160	4	141.637	SNP_3574192	1.19	4	0.348837	0.144444	0.326531	0.305853	3	0.0111533	-0.193239	1
7A	161	4	142.637		0.27	6	2.17442	1.85038	2.02598	2.1676	0.8	0.0742203	-0.249829	0.955		161	4	142.637		0.5	5	4.571	5.49293	4.65693	13.8507	1.4	-0.0429641	0.878961	0.955		161	4	142.637		1.17	6	0.349572	0.141271	0.333914	0.305153	3.2	0.00782931	-0.200472	0.955
7A	162	4	143.637		0.31	7	2.21066	1.83716	2.01987	2.16232	1.1	0.0953955	-0.278109	0.917		162	4	143.637		0.55	6	4.53229	5.53028	4.61566	13.8153	1.6	-0.0416819	0.956305	0.917		162	4	143.637		1.15	6	0.349628	0.138989	0.340073	0.304605	3.4	0.00477742	-0.205861	0.917
7A	163	4	144.637		0.35	8	2.24742	1.82455	2.01215	2.15627	1.3	0.117634	-0.305231	0.885		163	4	144.637		0.59	7	4.49594	5.56479	4.578	13.7799	1.9	-0.0410279	1.02781	0.885		163	4	144.637		1.12	7	0.3489	0.137729	0.344783	0.304259	3.5	0.00205851	-0.209113	0.885
7A	164	4	145.637		0.4	9	2.28197	1.81398	2.00253	2.15008	1.6	0.139722	-0.328268	0.859		164	4	145.637		0.63	7	4.46345	5.59505	4.54542	13.7467	2.1	-0.0409841	1.09062	0.859		164	4	145.637		1.07	8	0.347279	0.137549	0.347954	0.304146	3.5	-0.000337799	-0.210067	0.859
7A	165	4	146.637		0.44	9	2.31247	1.80625	1.99105	2.14431	1.9	0.160708	-0.345514	0.839		165	4	146.637		0.67	8	4.43617	5.61993	4.51897	13.7178	2.3	-0.0413988	1.14236	0.839		165	4	146.637		1.01	8	0.34464	0.138479	0.349583	0.30428	3.5	-0.0024717	-0.208632	0.839
7A	166	4	147.637		0.49	10	2.33814	1.80138	1.97825	2.13931	2.1	0.179941	-0.356816	0.825		166	4	147.637		0.69	8	4.41545	5.63835	4.49951	13.6954	2.5	-0.0420278	1.18087	0.825		166	4	147.637		0.94	8	0.340845	0.140544	0.349714	0.304666	3.3	-0.00443471	-0.204736	0.825
7A	167	4	148.637		0.53	10	2.35831	1.79928	1.96481	2.13538	2.3	0.196751	-0.362287	0.817		167	4	148.637		0.71	8	4.40229	5.64965	4.48743	13.6811	2.6	-0.0425702	1.20478	0.817		167	4	148.637		0.85	9	0.335741	0.143786	0.34841	0.305297	3.1	-0.00633465	-0.19829	0.817
7A	168	4	149.637		0.57	9	2.37258	1.7998	1.95136	2.13273	2.4	0.210609	-0.362171	0.815		168	4	149.637		0.72	8	4.39745	5.65341	4.48286	13.676	2.6	-0.0427049	1.21325	0.815		168	4	149.637		0.76	9	0.329153	0.148284	0.345717	0.306162	2.9	-0.00828228	-0.189151	0.815
7A	169	4	150.637		0.6	9	2.38082	1.80278	1.93831	2.13149	2.5	0.221254	-0.356787	0.819		169	4	150.637		0.72	8	4.4014	5.64953	4.48562	13.6803	2.6	-0.0421106	1.20601	0.819		169	4	150.637		0.67	9	0.320956	0.154094	0.341706	0.307229	2.5	-0.0103755	-0.177237	0.819
7A	170	4	151.637		0.63	9	2.38312	1.80813	1.92584	2.13167	2.5	0.228643	-0.346345	0.829		170	4	151.637		0.7	8	4.41436	5.63816	4.49532	13.6939	2.5	-0.0404798	1.18332	0.829		170	4	151.637		0.57	9	0.311153	0.161207	0.336482	0.308443	2.1	-0.0126643	-0.162611	0.829
7A	171	4	152.637		0.65	8	2.37992	1.81564	1.91399	2.13315	2.4	0.232968	-0.331316	0.845		171	4	152.637		0.68	7	4.4363	5.6197	4.51136	13.7156	2.3	-0.0375304	1.14587	0.845		171	4	152.637		0.48	8	0.300002	0.169449	0.330225	0.309715	1.7	-0.0151115	-0.145664	0.845
7A	172	4	153.637		0.66	8	2.37201	1.82491	1.90285	2.13568	2.3	0.23458	-0.312512	0.868		172	4	153.637		0.65	7	4.4666	5.59498	4.53279	13.7439	2.1	-0.0330934	1.09528	0.868		172	4	153.637		0.4	8	0.288113	0.178405	0.323251	0.310931	1.3	-0.0175689	-0.127277	0.868
7A	173	4	154.637		0.66	7	2.3602	1.83556	1.89249	2.13895	2.1	0.233858	-0.290786	0.896		173	4	154.637		0.61	6	4.50452	5.56485	4.55868	13.7769	1.9	-0.0270827	1.03326	0.896		173	4	154.637		0.32	7	0.276274	0.187525	0.315944	0.311995	1	-0.0198346	-0.108584	0.896
7A	174	4	155.637		0.66	6	2.34548	1.84708	1.88301	2.14264	2	0.231234	-0.267165	0.931		174	4	155.637		0.57	6	4.54856	5.53062	4.58784	13.8122	1.6	-0.019644	0.962415	0.931		174	4	155.637		0.25	6	0.265219	0.196269	0.308703	0.312852	0.7	-0.021742	-0.0906927	0.931
7A	175	4	156.637		0.66	5	2.32878	1.85902	1.87452	2.14648	1.8	0.227132	-0.242636	0.972		175	4	156.637		0.52	5	4.59698	5.49357	4.61918	13.8477	1.4	-0.0110972	0.885484	0.972		175	4	156.637		0.2	5	0.255389	0.204281	0.301839	0.313499	0.5	-0.0232251	-0.0743329	0.972
7A	176	4	157.255	SNP_988105	0.65	4	2.31786	1.8664	1.86979	2.14882	1.7	0.224035	-0.227418	1		176	4	157.255	SNP_988105	0.49	4	4.62818	5.46989	4.63915	13.8688	1.2	-0.00548356	0.836225	1		176	4	157.255	SNP_988105	0.17	4	0.25	0.208791	0.297872	0.313806	0.4	-0.0239362	-0.065145	1
7A	177	4	158.255		0.74	5	2.34927	1.85264	1.86341	2.14126	2	0.242927	-0.253705	0.951		177	4	158.255		0.52	5	4.58821	5.50605	4.61671	13.8396	1.5	-0.0142507	0.903584	0.951		177	4	158.255		0.2	5	0.254736	0.203137	0.303327	0.313413	0.6	-0.0242954	-0.0758944	0.951
7A	178	4	159.255		0.83	6	2.38172	1.83777	1.85749	2.13264	2.4	0.262117	-0.281841	0.908		178	4	159.255		0.55	6	4.5463	5.54425	4.59355	13.8064	1.7	-0.0236262	0.974326	0.908		178	4	159.255		0.24	6	0.260551	0.196601	0.309127	0.312901	0.7	-0.0242878	-0.0882382	0.908
7A	179	4	160.255		0.92	7	2.41455	1.82214	1.85204	2.12304	2.9	0.281257	-0.311156	0.87		179	4	160.255		0.58	7	4.5034	5.5838	4.5702	13.7696	2	-0.0333998	1.04699	0.87		179	4	160.255		0.29	8	0.267531	0.189129	0.315216	0.312241	0.9	-0.0238423	-0.102244	0.87
7A	180	4	161.255		1.02	8	2.44686	1.80625	1.84699	2.11271	3.3	0.299937	-0.34068	0.836		180	4	161.255		0.6	8	4.46091	5.6236	4.54749	13.7302	2.2	-0.0432911	1.11941	0.836		180	4	161.255		0.34	9	0.275616	0.180776	0.321481	0.311407	1.2	-0.0229325	-0.117772	0.836
7A	181	4	162.255		1.13	8	2.47763	1.79075	1.84219	2.10203	3.8	0.317724	-0.36916	0.808		181	4	162.255		0.62	9	4.42059	5.66219	4.52654	13.69	2.5	-0.0529757	1.18862	0.808		181	4	162.255		0.39	10	0.284557	0.171733	0.327753	0.310388	1.5	-0.0215981	-0.134422	0.808
7A	182	4	163.255		1.23	9	2.50594	1.77626	1.83745	2.09144	4.3	0.334245	-0.395436	0.784		182	4	163.255		0.64	10	4.3845	5.6977	4.50876	13.6517	2.8	-0.0621325	1.25107	0.784		182	4	163.255		0.46	11	0.293851	0.162384	0.333804	0.309211	1.9	-0.0199764	-0.151443	0.784
7A	183	4	164.255		1.33	9	2.53083	1.76346	1.83249	2.08146	4.8	0.349168	-0.418204	0.765		183	4	164.255		0.66	11	4.35477	5.72807	4.49577	13.6184	3	-0.0704993	1.30281	0.765		183	4	164.255		0.52	12	0.302803	0.153264	0.339374	0.307945	2.3	-0.0182855	-0.167825	0.765
7A	184	4	165.255		1.43	10	2.55176	1.75274	1.82716	2.07252	5.2	0.3623	-0.436721	0.752		184	4	165.255		0.66	11	4.3335	5.75105	4.48932	13.5938	3.2	-0.0779081	1.33964	0.752		184	4	165.255		0.59	13	0.310711	0.144929	0.344236	0.306694	2.7	-0.0167622	-0.182544	0.752
7A	185	4	166.255		1.52	10	2.56824	1.74449	1.82123	2.065	5.5	0.373508	-0.450247	0.743		185	4	166.255		0.65	12	4.32201	5.76499	4.4907	13.5808	3.3	-0.0843473	1.35864	0.743		185	4	166.255		0.65	13	0.31703	0.137824	0.348229	0.30557	3	-0.0155994	-0.194805	0.743
7A	186	4	167.255		1.6	10	2.5802	1.73881	1.81466	2.05911	5.8	0.382768	-0.458621	0.738		186	4	167.255		0.64	12	4.32162	5.76805	4.50135	13.582	3.3	-0.0898671	1.35657	0.738		186	4	167.255		0.71	13	0.321493	0.132189	0.351297	0.304658	3.3	-0.0149019	-0.204206	0.738
7A	187	4	168.255		1.68	10	2.58768	1.73568	1.80748	2.05494	6	0.3901	-0.461899	0.739		187	4	168.255		0.61	12	4.33258	5.75942	4.52181	13.5982	3.2	-0.0946156	1.33223	0.739		187	4	168.255		0.77	13	0.324007	0.128123	0.353443	0.304011	3.5	-0.0147183	-0.210602	0.739
7A	188	4	169.255		1.74	10	2.59091	1.73499	1.79978	2.05248	6.1	0.395564	-0.460357	0.744		188	4	169.255		0.58	12	4.35452	5.73892	4.552	13.6284	3	-0.0987394	1.28566	0.744		188	4	169.255		0.81	12	0.324577	0.125648	0.354712	0.303657	3.7	-0.0150675	-0.213997	0.744
7A	189	4	170.255		1.8	9	2.59018	1.73657	1.7917	2.05165	6.1	0.399236	-0.454374	0.754		189	4	170.255		0.53	11	4.38646	5.70708	4.59114	13.6703	2.7	-0.102337	1.21828	0.754		189	4	170.255		0.85	12	0.323326	0.124694	0.355184	0.303593	3.7	-0.0159289	-0.214561	0.754
7A	190	4	171.255		1.84	9	2.58593	1.74009	1.78349	2.05225	6.1	0.40122	-0.444624	0.769		190	4	171.255		0.49	11	4.42612	5.66601	4.63699	13.7193	2.3	-0.105439	1.13446	0.769		190	4	171.255		0.87	11	0.320338	0.125223	0.354931	0.303806	3.6	-0.0172965	-0.212411	0.769
7A	191	4	172.255		1.87	8	2.57854	1.74535	1.77532	2.05412	6	0.401613	-0.431581	0.789		191	4	172.255		0.44	10	4.47125	5.61799	4.6872	13.7709	1.9	-0.107976	1.03877	0.789		191	4	172.255		0.88	11	0.315822	0.127099	0.354052	0.304255	3.5	-0.019115	-0.207838	0.789
7A	192	4	173.255		1.9	8	2.56851	1.752	1.76744	2.05703	5.9	0.400534	-0.415983	0.814		192	4	173.255		0.39	9	4.51887	5.56632	4.73859	13.8204	1.6	-0.109858	0.937593	0.814		192	4	173.255		0.89	10	0.309994	0.130186	0.352639	0.304892	3.3	-0.0213229	-0.20113	0.814
7A	193	4	174.255		1.92	7	2.55624	1.75979	1.76004	2.06077	5.7	0.398102	-0.398348	0.843		193	4	174.255		0.34	8	4.56636	5.51405	4.7884	13.8647	1.3	-0.111018	0.836665	0.843		193	4	174.255		0.89	9	0.303205	0.134237	0.350798	0.305652	3	-0.0237965	-0.192765	0.843
7A	194	4	175.255		1.93	7	2.54219	1.76842	1.75329	2.06515	5.5	0.39445	-0.379321	0.878		194	4	175.255		0.3	7	4.61172	5.46362	4.83465	13.9023	1	-0.111461	0.740432	0.878		194	4	175.255		0.88	8	0.295866	0.138953	0.34863	0.306465	2.8	-0.0263818	-0.183294	0.878
7A	195	4	176.255		1.94	6	2.52677	1.77765	1.74734	2.06997	5.3	0.389714	-0.359402	0.917		195	4	176.255		0.26	6	4.65368	5.41665	4.8762	13.9328	0.8	-0.111259	0.651705	0.917		195	4	176.255		0.87	7	0.288398	0.144022	0.346226	0.307271	2.5	-0.028914	-0.17329	0.917
7A	196	4	177.255		1.94	5	2.51034	1.78723	1.74228	2.07508	5	0.384033	-0.339083	0.962		196	4	177.255		0.23	5	4.69164	5.37397	4.91268	13.957	0.6	-0.11052	0.571807	0.962		196	4	177.255		0.86	5	0.281156	0.149166	0.34366	0.308029	2.3	-0.0312519	-0.163243	0.962
7A	197	4	177.856	SNP_1205758	1.94	4	2.50014	1.79306	1.73969	2.07822	4.9	0.380223	-0.326854	0.991		197	4	177.856	SNP_1205758	0.21	4	4.71247	5.35051	4.9322	13.9689	0.5	-0.109866	0.528171	0.991		197	4	177.856	SNP_1205758	0.85	4	0.277022	0.152205	0.342065	0.308451	2.1	-0.0325215	-0.157339	0.991
7A	198	4	178.856		2.09	6	2.55686	1.77842	1.74378	2.06314	5.6	0.406538	-0.371898	0.954		198	4	178.856		0.21	5	4.66734	5.35674	4.93563	13.959	0.6	-0.134145	0.555252	0.954		198	4	178.856		0.9	6	0.278649	0.147278	0.353061	0.307265	2.5	-0.0372058	-0.168577	0.954
7A	199	4	179.856		2.23	6	2.61417	1.76668	1.74814	2.04801	6.3	0.433014	-0.414477	0.928		199	4	179.856		0.2	6	4.63157	5.35423	4.94058	13.9533	0.6	-0.154503	0.568155	0.928		199	4	179.856		0.92	7	0.279306	0.145783	0.360391	0.306551	2.7	-0.0405425	-0.174065	0.928
7A	200	4	180.856		2.37	7	2.66824	1.75894	1.75262	2.03446	6.9	0.457811	-0.451495	0.914		200	4	180.856		0.18	7	4.61315	5.34025	4.94731	13.9547	0.6	-0.167083	0.560022	0.914		200	4	180.856		0.91	7	0.278176	0.147359	0.364727	0.306325	2.8	-0.0432756	-0.174093	0.914
7A	201	4	181.856		2.47	7	2.71459	1.75627	1.75709	2.02445	7.4	0.478748	-0.479567	0.911		201	4	181.856		0.15	7	4.61913	5.31366	4.95588	13.9647	0.6	-0.168376	0.526156	0.911		201	4	181.856		0.88	7	0.274386	0.151692	0.366634	0.306553	2.7	-0.046124	-0.168817	0.911
7A	202	4	182.856		2.53	7	2.7483	1.75997	1.76149	2.02018	7.6	0.493407	-0.494926	0.92		202	4	182.856		0.12	7	4.65263	5.27597	4.96595	13.9817	0.4	-0.156663	0.466681	0.92		202	4	182.856		0.83	7	0.267189	0.158619	0.366264	0.307192	2.5	-0.0495374	-0.158107	0.92
7A	203	4	183.856		2.53	7	2.76328	1.77206	1.7658	2.02429	7.4	0.49874	-0.492482	0.94		203	4	183.856		0.09	6	4.70985	5.23172	4.97685	14.0013	0.3	-0.133499	0.388374	0.94		203	4	183.856		0.77	7	0.256562	0.16778	0.363463	0.308146	2.2	-0.0534503	-0.142232	0.94
7A	204	4	184.856		2.44	6	2.75088	1.79584	1.77018	2.03983	6.7	0.490349	-0.464691	0.972		204	4	184.856		0.06	5	4.7789	5.18778	4.98779	14.0183	0.2	-0.104441	0.30443	0.972		204	4	184.856		0.7	5	0.243873	0.178304	0.358032	0.309262	1.9	-0.0570792	-0.122648	0.972
7A	205	4	185.531	SNP_3574795	2.33	4	2.72242	1.81979	1.77333	2.05743	5.9	0.474545	-0.428092	1		205	4	185.531	SNP_3574795	0.05	4	4.82529	5.16124	4.9949	14.0267	0.1	-0.0848039	0.251139	1		205	4	185.531	SNP_3574795	0.65	4	0.235294	0.185567	0.352941	0.310025	1.6	-0.0588235	-0.108551	1
7A	206	4	186.531		2.17	5	2.69353	1.82464	1.77242	2.06383	5.6	0.460551	-0.408334	0.966		206	4	186.531		0.1	4	4.81223	5.23325	4.88606	14.0076	0.3	-0.0369174	0.384107	0.966		206	4	186.531		0.62	6	0.228899	0.182937	0.356011	0.309582	1.8	-0.0635557	-0.109518	0.966
7A	207	4	187.531		2	5	2.6569	1.83143	1.77227	2.07225	5.2	0.442313	-0.383159	0.954		207	4	187.531		0.18	5	4.80194	5.30874	4.78313	13.9765	0.5	0.00940647	0.516206	0.954		207	4	187.531		0.55	6	0.222692	0.186091	0.349238	0.310112	1.6	-0.0632734	-0.0998742	0.954
7A	208	4	188.531		1.81	5	2.61145	1.84056	1.7732	2.08283	4.7	0.419124	-0.351768	0.964		208	4	188.531		0.28	5	4.7968	5.37907	4.6962	13.9391	0.7	0.050301	0.632572	0.964		208	4	188.531		0.44	6	0.216716	0.193946	0.335641	0.31124	1.2	-0.0594626	-0.0822328	0.964
7A	209	4	189.531		1.62	4	2.55764	1.85217	1.77562	2.09523	4.1	0.391007	-0.314462	0.996		209	4	189.531		0.39	4	4.7984	5.43693	4.6306	13.9037	1	0.0839003	0.722433	0.996		209	4	189.531		0.33	4	0.211068	0.205613	0.317663	0.312557	0.8	-0.0532972	-0.0587529	0.996
7A	210	4	189.631	SNP_2327135	1.6	4	2.55189	1.85345	1.77596	2.09654	4.1	0.387963	-0.310476	1		210	4	189.631	SNP_2327135	0.4	4	4.79895	5.44184	4.62526	13.9006	1	0.0868421	0.729734	1		210	4	189.631	SNP_2327135	0.31	4	0.210526	0.206897	0.315789	0.312678	0.8	-0.0526316	-0.0562613	1
7A	211	4	190.631		1.5	5	2.55209	1.84595	1.78858	2.0975	4	0.381755	-0.32439	0.957		211	4	190.631		0.44	5	4.75707	5.47084	4.60706	13.8796	1.2	0.0750056	0.788776	0.957		211	4	190.631		0.31	5	0.202894	0.210397	0.316145	0.312669	0.8	-0.0566256	-0.0491221	0.957
7A	212	4	191.631		1.38	6	2.54355	1.84132	1.80111	2.10045	3.9	0.371216	-0.331013	0.923		212	4	191.631		0.47	5	4.71384	5.49977	4.59051	13.8572	1.3	0.0616657	0.847593	0.923		212	4	191.631		0.3	5	0.193211	0.215253	0.315592	0.312659	0.8	-0.0611903	-0.0391487	0.923
7A	213	4	192.631		1.23	6	2.52595	1.83982	1.81347	2.10548	3.7	0.35624	-0.329891	0.899		213	4	192.631		0.51	6	4.67114	5.52768	4.57607	13.8342	1.5	0.0475334	0.904074	0.899		213	4	192.631		0.3	6	0.181623	0.22147	0.314042	0.312609	0.8	-0.0662097	-0.0263626	0.899
7A	214	4	193.631		1.07	7	2.49881	1.8419	1.82552	2.11266	3.3	0.336648	-0.320269	0.883		214	4	193.631		0.55	6	4.63137	5.55345	4.56413	13.812	1.6	0.0336226	0.955703	0.883		214	4	193.631		0.3	7	0.168909	0.228765	0.311465	0.312486	0.9	-0.0712779	-0.0114215	0.883
7A	215	4	194.631		0.9	7	2.46134	1.84827	1.83712	2.12199	2.9	0.312112	-0.300963	0.877		215	4	194.631		0.59	6	4.59705	5.57601	4.55488	13.7918	1.8	0.0210845	1.00005	0.877		215	4	194.631		0.32	7	0.156462	0.236556	0.307925	0.312287	0.9	-0.0757318	0.0043623	0.877
7A	216	4	195.631		0.72	7	2.41256	1.85988	1.84813	2.13332	2.4	0.282213	-0.27047	0.879		216	4	195.631		0.63	6	4.57062	5.59433	4.54839	13.7753	1.9	0.0111116	1.03482	0.879		216	4	195.631		0.34	7	0.145633	0.244226	0.303588	0.312046	1	-0.0789776	0.0196154	0.879
7A	217	4	196.631		0.54	7	2.35182	1.87764	1.85846	2.14609	1.8	0.24668	-0.227504	0.891		217	4	196.631		0.66	6	4.55415	5.60752	4.54463	13.7639	2	0.00476133	1.05814	0.891		217	4	196.631		0.36	7	0.137151	0.251376	0.298684	0.311808	1.1	-0.0807664	0.0334584	0.891
7A	218	4	197.631		0.38	7	2.281	1.90128	1.86812	2.15886	1.2	0.206442	-0.17328	0.911		218	4	197.631		0.7	6	4.54898	5.61497	4.54345	13.7586	2	0.00276774	1.06875	0.911		218	4	197.631		0.4	6	0.131111	0.257837	0.293465	0.311606	1.1	-0.0811769	0.0455488	0.911
7A	219	4	198.631		0.25	6	2.20742	1.92764	1.87725	2.16944	0.7	0.165084	-0.114698	0.941		219	4	198.631		0.73	5	4.55545	5.61643	4.54469	13.7597	2	0.00537963	1.06637	0.941		219	4	198.631		0.43	5	0.127277	0.263565	0.288166	0.311451	1.2	-0.0804443	0.0558438	0.941
7A	220	4	199.631		0.15	4	2.14054	1.95214	1.88607	2.17656	0.4	0.127233	-0.0611686	0.979		220	4	199.631		0.76	5	4.57263	5.61221	4.54812	13.7669	2	0.0122518	1.05183	0.979		220	4	199.631		0.47	5	0.125337	0.26856	0.28298	0.311349	1.2	-0.0788215	0.0644015	0.979
7A	221	4	200.085	SNP_3575038	0.12	4	2.11375	1.96193	1.89	2.17873	0.3	0.111875	-0.0399473	1		221	4	200.085	SNP_3575038	0.77	4	4.5835	5.60859	4.55035	13.7719	1.9	0.0165746	1.04166	1		221	4	200.085	SNP_3575038	0.49	4	0.125	0.270588	0.280702	0.31132	1.2	-0.0778509	0.0677374	1
7A	222	4	201.085		0.11	4	2.10902	1.96553	1.8888	2.17903	0.3	0.110107	-0.0333837	0.958		222	4	201.085		0.73	5	4.5881	5.61165	4.53613	13.7665	2	0.0259891	1.04954	0.958		222	4	201.085		0.47	4	0.125686	0.272154	0.277479	0.311399	1.2	-0.0758965	0.0705719	0.958
7A	223	4	202.085		0.1	5	2.10346	1.96923	1.88793	2.17937	0.3	0.107768	-0.0264652	0.924		223	4	202.085		0.69	6	4.60134	5.60877	4.52524	13.7669	2	0.0380539	1.04548	0.924		223	4	202.085		0.46	5	0.126395	0.273892	0.273922	0.311471	1.2	-0.0737634	0.0737333	0.924
7A	224	4	203.085		0.09	5	2.09714	1.97292	1.8875	2.17973	0.3	0.104818	-0.0194024	0.896		224	4	203.085		0.64	6	4.62447	5.59913	4.51824	13.7738	1.9	0.0531133	1.02778	0.896		224	4	203.085		0.44	5	0.127123	0.27579	0.270055	0.311534	1.2	-0.0714662	0.0772009	0.896
7A	225	4	204.085		0.08	5	2.09013	1.97646	1.88767	2.18013	0.2	0.101232	-0.0124419	0.876		225	4	204.085		0.59	7	4.65829	5.58226	4.51558	13.7873	1.8	0.0713566	0.995325	0.876		225	4	204.085		0.43	5	0.127866	0.277828	0.265916	0.311584	1.1	-0.0690253	0.0809371	0.876
7A	226	4	205.085		0.08	5	2.08257	1.97972	1.88856	2.18055	0.2	0.0970036	-0.00584453	0.863		226	4	205.085		0.53	7	4.70313	5.55797	4.51755	13.8068	1.7	0.09279	0.947628	0.863		226	4	205.085		0.43	5	0.128623	0.279978	0.261557	0.311618	1.1	-0.0664672	0.0848877	0.863
7A	227	4	206.085		0.07	5	2.07458	1.98258	1.89028	2.18099	0.2	0.0921488	0.000144985	0.857		227	4	206.085		0.47	7	4.75834	5.52668	4.52422	13.8309	1.5	0.117058	0.885403	0.857		227	4	206.085		0.42	5	0.129394	0.282201	0.25704	0.311636	1.1	-0.0638233	0.0889838	0.857
7A	228	4	207.085		0.06	5	2.06632	1.98493	1.89289	2.18145	0.2	0.0867119	0.00532779	0.858		228	4	207.085		0.42	7	4.82215	5.48941	4.53535	13.8576	1.3	0.143397	0.810658	0.858		228	4	207.085		0.42	5	0.13018	0.284453	0.252436	0.311636	1.1	-0.0611281	0.0931451	0.858
7A	229	4	208.085		0.05	5	2.05792	1.98673	1.89638	2.18193	0.2	0.0807657	0.00957476	0.867		229	4	208.085		0.36	7	4.89169	5.4478	4.55044	13.8846	1.1	0.170629	0.726732	0.867		229	4	208.085		0.42	5	0.130984	0.286686	0.247819	0.311619	1.1	-0.0584176	0.0972841	0.867
7A	230	4	209.085		0.05	5	2.04951	1.98794	1.90069	2.1824	0.1	0.0744099	0.0128403	0.882		230	4	209.085		0.32	6	4.96337	5.40389	4.56871	13.9095	1	0.19733	0.637851	0.882		230	4	209.085		0.43	5	0.131811	0.288849	0.243264	0.311588	1.1	-0.0557265	0.101312	0.882
7A	231	4	210.085		0.04	5	2.04122	1.98862	1.90569	2.18286	0.1	0.0677653	0.0151625	0.905		231	4	210.085		0.28	6	5.03335	5.35992	4.58924	13.931	0.8	0.222054	0.548626	0.905		231	4	210.085		0.44	5	0.132666	0.290894	0.238839	0.311546	1.2	-0.0530867	0.105142	0.905
7A	232	4	211.085		0.03	5	2.03314	1.98882	1.91121	2.1833	0.1	0.0609651	0.0166487	0.934		232	4	211.085		0.25	5	5.09861	5.31765	4.61112	13.9483	0.7	0.243747	0.462784	0.934		232	4	211.085		0.45	5	0.133555	0.292776	0.234605	0.311498	1.2	-0.0505252	0.108696	0.934
7A	233	4	212.085		0.03	4	2.02534	1.98864	1.91705	2.1837	0.1	0.0541444	0.0174485	0.971		233	4	212.085		0.22	4	5.1571	5.27842	4.63353	13.9618	0.6	0.261783	0.383109	0.971		233	4	212.085		0.46	4	0.134483	0.294454	0.23061	0.311448	1.2	-0.0480632	0.111908	0.971
7A	234	4	212.759	SNP_3574328	0.03	4	2.02027	1.98835	1.92107	2.18395	0.1	0.0495994	0.0176821	1		234	4	212.759	SNP_3574328	0.21	4	5.19216	5.25409	4.6486	13.9689	0.5	0.271783	0.333712	1		234	4	212.759	SNP_3574328	0.47	4	0.135135	0.295455	0.22807	0.311415	1.2	-0.0464675	0.113852	1
7A	235	4	213.759		0.02	5	1.97552	2.00632	1.92155	2.18402	0.1	0.0269884	0.0577817	0.976		235	4	213.759		0.15	4	5.13814	5.23548	4.70212	13.988	0.4	0.218006	0.31535	0.976		235	4	213.759		0.43	5	0.134932	0.289154	0.237013	0.311748	1.1	-0.0510404	0.103182	0.976
7A	236	4	214.759		0.03	4	1.9307	2.02028	1.92787	2.18329	0.1	0.00141253	0.0909981	0.982		236	4	214.759		0.1	4	5.08481	5.20616	4.77505	14.0085	0.2	0.154881	0.276231	0.982		236	4	214.759		0.39	4	0.135	0.280142	0.250707	0.312104	1	-0.0578533	0.0872888	0.982
7A	237	4	215.341	SNP_1314882	0.05	4	1.90865	2.02466	1.93491	2.18276	0.1	-0.0131285	0.102882	1		237	4	215.341	SNP_1314882	0.07	4	5.05432	5.18637	4.82352	14.0191	0.2	0.115403	0.247452	1		237	4	215.341	SNP_1314882	0.37	4	0.135135	0.274725	0.259259	0.312234	0.9	-0.0620621	0.0775281	1
7A	238	4	216.341		0.03	5	1.91749	2.01458	1.94555	2.18364	0.1	-0.0140287	0.0830599	0.962		238	4	216.341		0.09	5	4.97024	5.23257	4.79952	14.0073	0.3	0.0853589	0.347685	0.962		238	4	216.341		0.35	4	0.137167	0.272325	0.263578	0.312305	0.9	-0.0632054	0.0719525	0.962
7A	239	4	217.341		0.01	5	1.92771	2.00202	1.95965	2.18446	0	-0.0159708	0.0583426	0.933		239	4	217.341		0.12	6	4.89509	5.27321	4.77979	13.9926	0.4	0.0576473	0.435766	0.933		239	4	217.341		0.34	5	0.139586	0.269692	0.268048	0.312386	0.9	-0.0642312	0.0658754	0.933
7A	240	4	218.341		0.01	5	1.93893	1.98731	1.97709	2.18501	0	-0.0190798	0.0292932	0.914		240	4	218.341		0.15	6	4.84011	5.30259	4.76614	13.9793	0.5	0.0369818	0.499463	0.914		240	4	218.341		0.32	5	0.142365	0.266876	0.272625	0.312471	0.9	-0.0651301	0.0593802	0.914
7A	241	4	219.341		0	5	1.9505	1.97136	1.99681	2.1851	0	-0.0231571	-0.00230039	0.905		241	4	219.341		0.17	6	4.8064	5.3189	4.76063	13.9709	0.5	0.0228861	0.535383	0.905		241	4	219.341		0.31	5	0.145466	0.26393	0.277254	0.312556	0.8	-0.065894	0.0525695	0.905
7A	242	4	220.341		0.01	6	1.96159	1.95564	2.01687	2.18466	0	-0.027641	-0.0335834	0.906		242	4	220.341		0.17	6	4.79023	5.32212	4.76586	13.9692	0.5	0.0121866	0.544071	0.906		242	4	220.341		0.3	5	0.148834	0.260915	0.281867	0.312636	0.8	-0.0665162	0.0455643	0.906
7A	243	4	221.341		0.02	6	1.97142	1.94173	2.03505	2.18384	0.1	-0.0318143	-0.0615031	0.917		243	4	221.341		0.16	6	4.78741	5.3123	4.78516	13.9744	0.5	0.00112737	0.526017	0.917		243	4	221.341		0.3	5	0.152403	0.257897	0.286388	0.312709	0.8	-0.0669923	0.0385011	0.917
7A	244	4	222.341		0.04	5	1.97953	1.93062	2.04986	2.18289	0.1	-0.0351623	-0.0840742	0.938		244	4	222.341		0.14	5	4.79458	5.28919	4.82214	13.986	0.4	-0.0137774	0.480833	0.938		244	4	222.341		0.29	5	0.156096	0.254943	0.290734	0.312772	0.8	-0.0673189	0.0315276	0.938
7A	245	4	223.341		0.05	5	1.98578	1.92258	2.06074	2.18205	0.2	-0.0374784	-0.100684	0.968		245	4	223.341		0.11	5	4.80938	5.25348	4.87812	14.0015	0.3	-0.034372	0.409726	0.968		245	4	223.341		0.29	4	0.159831	0.252119	0.294818	0.312824	0.7	-0.0674935	0.0247942	0.968
7A	246	4	224.15	SNP_3575075	0.07	4	1.98956	1.9182	2.06674	2.18153	0.2	-0.0385908	-0.109948	1		246	4	224.15	SNP_3575075	0.08	4	4.82579	5.2179	4.93362	14.014	0.2	-0.0539115	0.3382	1		246	4	224.15	SNP_3575075	0.29	4	0.162829	0.249972	0.297872	0.312861	0.7	-0.0675214	0.0196215	1
7A	247	4	225.15		0.02	5	1.99926	1.93883	2.01715	2.18411	0.1	-0.00894441	-0.0693755	0.953		247	4	225.15		0.1	5	4.76881	5.24113	4.93984	14.0037	0.3	-0.0855113	0.386808	0.953		247	4	225.15		0.27	6	0.16082	0.248681	0.298853	0.31278	0.8	-0.0690165	0.0188448	0.953
7A	248	4	226.15		0.01	4	2.00902	1.96655	1.95705	2.18498	0	0.025987	-0.0164927	0.923		248	4	226.15		0.13	5	4.70829	5.26608	4.94431	13.9908	0.4	-0.118013	0.439781	0.923		248	4	226.15		0.25	7	0.163014	0.246133	0.298668	0.312888	0.7	-0.0678274	0.0152925	0.923
7A	249	4	227.15		0.04	6	2.01934	1.99783	1.89311	2.18282	0.1	0.0631182	0.0416019	0.912		249	4	227.15		0.17	5	4.64781	5.29104	4.94762	13.976	0.5	-0.149902	0.493321	0.912		249	4	227.15		0.21	7	0.17037	0.242034	0.297363	0.313186	0.6	-0.0634967	0.00816692	0.912
7A	250	4	228.15		0.11	6	2.0312	2.02499	1.83866	2.17819	0.3	0.0962707	0.0900579	0.92		250	4	228.15		0.21	5	4.59097	5.31419	4.95066	13.9606	0.6	-0.179847	0.543373	0.92		250	4	228.15		0.18	7	0.182334	0.236736	0.294934	0.313584	0.5	-0.0563001	-0.00189737	0.92
7A	251	4	229.15		0.19	5	2.04517	2.04401	1.80004	2.17311	0.6	0.122563	0.121399	0.945		251	4	229.15		0.25	5	4.54041	5.33398	4.95455	13.9461	0.7	-0.20707	0.5865	0.945		251	4	229.15		0.14	6	0.19605	0.231548	0.29136	0.313952	0.4	-0.0476549	-0.0121573	0.945
7A	252	4	230.15		0.29	4	2.06106	2.05569	1.77527	2.16879	0.8	0.142892	0.137527	0.988		252	4	230.15		0.31	4	4.4976	5.34926	4.96035	13.9338	0.8	-0.231379	0.620287	0.988		252	4	230.15		0.12	4	0.20825	0.227824	0.28681	0.314229	0.3	-0.0392801	-0.0197056	0.988
7A	253	4	230.37	SNP_3575341	0.31	4	2.06475	2.05747	1.77132	2.16798	0.8	0.146714	0.139433	1		253	4	230.37	SNP_3575341	0.32	4	4.48928	5.35193	4.96196	13.9315	0.8	-0.236344	0.626314	1		253	4	230.37	SNP_3575341	0.11	4	0.210564	0.227255	0.285714	0.31428	0.3	-0.0375749	-0.0208843	1
7A	254	4	231.37		0.29	6	2.05126	2.06267	1.77193	2.16814	0.8	0.139665	0.15107	0.921		254	4	231.37		0.29	5	4.47244	5.34004	5.01618	13.9304	0.8	-0.271871	0.595729	0.921		254	4	231.37		0.15	5	0.220728	0.217509	0.294971	0.313941	0.4	-0.0371216	-0.0403402	0.921
7A	255	4	232.37		0.27	8	2.03114	2.06941	1.77676	2.16877	0.8	0.127192	0.165455	0.876		255	4	232.37		0.27	6	4.46816	5.31967	5.07694	13.932	0.8	-0.304391	0.547126	0.876		255	4	232.37		0.19	6	0.232242	0.207094	0.303156	0.313456	0.5	-0.0354568	-0.0606048	0.876
7A	256	4	233.37		0.25	9	2.01169	2.07461	1.78589	2.16982	0.7	0.112901	0.175822	0.865		256	4	233.37		0.26	6	4.47629	5.29449	5.13724	13.9353	0.8	-0.330473	0.487726	0.865		256	4	233.37		0.24	7	0.241485	0.198241	0.30905	0.312945	0.7	-0.0337824	-0.077027	0.865
7A	257	4	234.37		0.22	7	2.00224	2.07321	1.7995	2.17164	0.6	0.10137	0.172342	0.888		257	4	234.37		0.26	6	4.49499	5.26918	5.18943	13.9392	0.7	-0.347219	0.426972	0.888		257	4	234.37		0.28	6	0.245953	0.19295	0.311744	0.312631	0.8	-0.0328954	-0.0858988	0.888
7A	258	4	235.37		0.19	5	2.00123	2.06492	1.81761	2.1742	0.5	0.0918081	0.155496	0.946		258	4	235.37		0.27	5	4.52132	5.24762	5.22824	13.9439	0.7	-0.353462	0.372847	0.946		258	4	235.37		0.3	5	0.246166	0.191528	0.311069	0.312623	0.8	-0.0324514	-0.087089	0.946
7A	259	4	235.999	SNP_1136032	0.17	4	2.00208	2.05731	1.83117	2.17601	0.4	0.0854544	0.140684	1		259	4	235.999	SNP_1136032	0.27	4	4.54041	5.23698	5.24501	13.9472	0.7	-0.352301	0.344271	1		259	4	235.999	SNP_1136032	0.3	4	0.244898	0.192297	0.309115	0.312757	0.8	-0.0321083	-0.0847089	1
7A	260	4	236.999		0.19	7	1.9838	2.06941	1.81673	2.17395	0.5	0.0835365	0.169143	0.944		260	4	236.999		0.2	5	4.57216	5.20858	5.21915	13.9664	0.5	-0.323495	0.312925	0.944		260	4	236.999		0.42	5	0.254638	0.183364	0.322225	0.311684	1.1	-0.0337936	-0.105067	0.944
7A	261	4	237.999		0.2	8	1.97804	2.06962	1.80683	2.17303	0.6	0.0856035	0.177185	0.934		261	4	237.999		0.13	5	4.64332	5.16558	5.19178	13.9931	0.4	-0.274229	0.248027	0.934		261	4	237.999		0.53	5	0.264303	0.177445	0.334165	0.310635	1.4	-0.034931	-0.121788	0.934
7A	262	4	238.999		0.2	5	1.99723	2.05586	1.80226	2.17376	0.5	0.0974822	0.156116	0.971		262	4	238.999		0.07	4	4.74982	5.11798	5.16149	14.0187	0.2	-0.205838	0.162325	0.971		262	4	238.999		0.64	5	0.270142	0.176044	0.343772	0.30994	1.7	-0.0368149	-0.130912	0.971
7A	263	4	239.423	SNP_3575352	0.2	4	2.00595	2.04989	1.80167	2.17414	0.5	0.10214	0.146086	1		263	4	239.423	SNP_3575352	0.05	4	4.80216	5.09938	5.14735	14.0273	0.1	-0.172592	0.12462	1		263	4	239.423	SNP_3575352	0.68	4	0.27027	0.177083	0.346939	0.309829	1.7	-0.0383343	-0.131521	1
7A	264	4	240.423		0.32	8	1.93885	2.09525	1.76484	2.16581	0.9	0.0870048	0.2434	0.966		264	4	240.423		0.16	5	4.58095	5.17278	5.1882	13.9842	0.4	-0.303623	0.288206	0.966		264	4	240.423		0.5	4	0.247044	0.189584	0.340386	0.311158	1.3	-0.0466709	-0.104132	0.966
7A	265	4	241.07	SNP_1040177	0.37	4	1.96872	2.09217	1.74638	2.16447	1	0.111167	0.234623	1		265	4	241.07	SNP_1040177	0.25	4	4.48718	5.20137	5.21479	13.9566	0.6	-0.363806	0.350383	1		265	4	241.07	SNP_1040177	0.4	4	0.230769	0.2	0.333333	0.312032	1	-0.0512821	-0.0820513	1
7A	266	4	242.07		0.1	4	1.99289	2.0248	1.84397	2.17979	0.3	0.0744637	0.106368	0.992		266	4	242.07		0.16	4	4.61625	5.12101	5.28181	13.9875	0.4	-0.332782	0.171981	0.992		266	4	242.07		0.47	4	0.254993	0.192072	0.340915	0.311411	1.2	-0.0429609	-0.105883	0.992
7A	267	4	242.142	SNP_1027229	0.08	4	1.99513	2.01948	1.85256	2.1806	0.2	0.071285	0.095636	1		267	4	242.142	SNP_1027229	0.15	4	4.63026	5.11364	5.28659	13.9901	0.4	-0.328167	0.155213	1		267	4	242.142	SNP_1027229	0.48	4	0.25641	0.191919	0.340909	0.311405	1.2	-0.0422494	-0.10674	1
7A	268	4	243.142		0.34	4	1.96994	2.09084	1.76231	2.16625	0.9	0.103812	0.224715	0.993		268	4	243.142		0.2	4	4.5751	5.24808	5.07028	13.9741	0.5	-0.247592	0.425395	0.993		268	4	243.142		0.77	4	0.250402	0.174368	0.360252	0.309027	2	-0.0549251	-0.130959	0.993
7A	269	4	243.204	SNP_1252209	0.36	4	1.9685	2.09471	1.75857	2.1653	0.9	0.104967	0.231175	1		269	4	243.204	SNP_1252209	0.2	4	4.57216	5.25589	5.0602	13.972	0.5	-0.244018	0.439707	1		269	4	243.204	SNP_1252209	0.78	4	0.250019	0.173907	0.36	0.308996	2	-0.0549906	-0.131102	1
7A	270	4	244.204		0.28	5	2.02338	2.06844	1.77369	2.1691	0.7	0.124848	0.169906	0.937		270	4	244.204		0.32	5	4.49173	5.36929	4.97155	13.92	0.9	-0.23991	0.637644	0.937		270	4	244.204		0.62	5	0.262607	0.173129	0.342151	0.309941	1.7	-0.0397721	-0.12925	0.937
7A	271	4	245.204		0.23	4	2.07246	2.03456	1.79717	2.17202	0.6	0.137645	0.0997442	0.958		271	4	245.204		0.38	5	4.48984	5.41558	4.9548	13.9024	1	-0.23248	0.693263	0.958		271	4	245.204		0.52	5	0.276888	0.172666	0.320355	0.310863	1.4	-0.0217335	-0.125955	0.958
7A	272	4	245.679	SNP_2282266	0.22	4	2.08947	2.01884	1.80935	2.17285	0.6	0.140063	0.0694286	0.998		272	4	245.679	SNP_2282266	0.36	4	4.52835	5.40191	4.97234	13.9177	0.9	-0.221995	0.65157	0.998		272	4	245.679	SNP_2282266	0.51	4	0.282638	0.172238	0.310663	0.311171	1.3	-0.0140128	-0.124413	0.998
7A	273	4	246.679		0.21	5	2.07636	2.02371	1.80333	2.17312	0.6	0.136515	0.0838637	0.934		273	4	246.679		0.37	6	4.49826	5.43419	4.93328	13.8946	1.1	-0.217513	0.718423	0.934		273	4	246.679		0.46	5	0.270473	0.176767	0.320067	0.311275	1.2	-0.024797	-0.118503	0.934
7A	274	4	247.679		0.2	5	2.05829	2.03089	1.7977	2.17344	0.5	0.130297	0.102893	0.892		274	4	247.679		0.37	6	4.48507	5.45447	4.89612	13.8785	1.2	-0.205521	0.76388	0.892		274	4	247.679		0.42	6	0.254301	0.184032	0.328681	0.311509	1.2	-0.0371901	-0.107459	0.892
7A	275	4	248.679		0.19	5	2.03593	2.04007	1.79263	2.17364	0.5	0.12165	0.125794	0.87		275	4	248.679		0.35	7	4.49575	5.45858	4.86368	13.875	1.2	-0.183969	0.778861	0.87		275	4	248.679		0.39	6	0.234401	0.194033	0.336126	0.311748	1.1	-0.0508626	-0.0912307	0.87
7A	276	4	249.679		0.19	6	2.01098	2.0504	1.78834	2.17354	0.5	0.111319	0.150741	0.87		276	4	249.679		0.32	7	4.53456	5.44423	4.83797	13.8869	1.1	-0.151705	0.757959	0.87		276	4	249.679		0.39	6	0.212343	0.206016	0.342093	0.31181	1.1	-0.0648752	-0.0712018	0.87
7A	277	4	250.679		0.2	5	1.98594	2.0606	1.78508	2.17312	0.6	0.100433	0.175086	0.89		277	4	250.679		0.28	7	4.60014	5.4125	4.81953	13.912	0.9	-0.109693	0.702665	0.89		277	4	250.679		0.43	5	0.190924	0.218516	0.346415	0.311593	1.1	-0.0777453	-0.0501534	0.89
7A	278	4	251.679		0.21	5	1.96321	2.06947	1.78301	2.17249	0.6	0.0900975	0.196358	0.931		278	4	251.679		0.24	6	4.68353	5.36851	4.80759	13.943	0.7	-0.0620295	0.622953	0.931		278	4	251.679		0.49	5	0.172535	0.230279	0.34904	0.311156	1.3	-0.0882523	-0.0305085	0.931
7A	279	4	252.679		0.24	4	1.94443	2.0761	1.7823	2.17189	0.6	0.0810655	0.212735	0.993		279	4	252.679		0.2	4	4.77044	5.32023	4.80068	13.9715	0.5	-0.0151177	0.53467	0.993		279	4	252.679		0.57	4	0.158019	0.240838	0.349993	0.310634	1.4	-0.0959869	-0.0131678	0.993
7A	280	4	252.77	SNP_2278798	0.24	4	1.94295	2.07657	1.78231	2.17184	0.6	0.0803202	0.213947	1		280	4	252.77	SNP_2278798	0.2	4	4.77806	5.31588	4.80025	13.9738	0.5	-0.0110948	0.526726	1		280	4	252.77	SNP_2278798	0.58	4	0.156887	0.241738	0.35	0.310586	1.5	-0.0965566	-0.0117057	1
7A	281	4	253.77		0.16	4	1.98511	2.0456	1.79879	2.17609	0.4	0.0931571	0.153649	0.963		281	4	253.77		0.22	6	4.67539	5.34733	4.86794	13.9527	0.6	-0.096274	0.575665	0.963		281	4	253.77		0.55	5	0.158532	0.241871	0.349123	0.310667	1.4	-0.0952956	-0.0119565	0.963
7A	282	4	254.77		0.12	4	2.03471	2.00777	1.81696	2.17831	0.3	0.108876	0.0819329	0.951		282	4	254.77		0.23	6	4.61669	5.3525	4.94401	13.9422	0.7	-0.163662	0.572144	0.951		282	4	254.77		0.51	5	0.160744	0.243224	0.344753	0.310941	1.3	-0.0920044	-0.00952466	0.951
7A	283	4	255.77		0.13	5	2.08125	1.96972	1.83606	2.17774	0.3	0.122593	0.0110614	0.965		283	4	255.77		0.22	5	4.6142	5.3242	5.02658	13.9514	0.7	-0.206185	0.50381	0.965		283	4	255.77		0.46	5	0.163538	0.246175	0.336121	0.311414	1.2	-0.0862914	-0.00365468	0.965
7A	284	4	256.684	SNP_1140847	0.17	4	2.11389	1.94	1.85359	2.17571	0.4	0.13015	-0.0437393	1		284	4	256.684	SNP_1140847	0.21	4	4.64556	5.27795	5.103	13.9693	0.5	-0.228722	0.403677	1		284	4	256.684	SNP_1140847	0.41	4	0.166667	0.25	0.325	0.311951	1	-0.0791667	0.00416667	1
[truncated: 10 more rows]

## Sheet: C1_a
Chromosome	48hai	Intervall (0.95)	12.4													72hai	Intervall (0.95)	4.4													Macro	Chromosome	Intervall (0.95)	19.4
[truncated: 300 more rows]

[truncated: 13 more sheets: C2_a, C3_a, C4_a, C5_a, C6_a, C7_a, C1_b, C2_b, C3_b, C4_b, C5_b, C6_b, C7_b]
