# Supplementary material for: Mapping of prehaustorial resistance against wheat leaf rust in einkorn (Triticum monococcum), a progenitor of wheat
Source: Front Plant Sci. 2023 Oct 23;14:1252123. doi: 10.3389/fpls.2023.1252123 (PMC10626456; doi:10.3389/fpls.2023.1252123)
Supplement: Supplementary file 4 [file Table_4.xlsx]

## Sheet: Table_S4
Table S4: Genes on the physical Triticum urartu chromosome 5A according to Ling et al., (2017)
Chromosome	Start	Stop	Gene_ID
5	3979	4630	TuG1812G0500000001.01
5	7027	16102	TuG1812G0500000002.01
5	187829	191538	TuG1812G0500000003.01
5	192156	196150	TuG1812G0500000004.01
5	197172	198807	TuG1812G0500000005.01
5	199944	201560	TuG1812G0500000006.01
5	201688	207501	TuG1812G0500000007.01
5	249536	250171	TuG1812G0500000008.01
5	293087	301881	TuG1812G0500000009.01
5	881754	884363	TuG1812G0500000010.01
5	1149868	1152554	TuG1812U0000078500.01
5	1149868	1152554	TuG1812G0500000011.01
5	1546897	1550123	TuG1812G0500000012.01
5	1551121	1554463	TuG1812G0500000013.01
5	1793375	1799645	TuG1812G0500000014.01
5	1801770	1803914	TuG1812G0500000015.01
5	2467028	2467501	TuG1812G0500000016.01
5	2573176	2574699	TuG1812G0500000017.01
5	2574749	2583025	TuG1812G0500000018.01
5	2584490	2587006	TuG1812G0500000019.01
5	2597501	2599219	TuG1812G0500000020.01
5	2603765	2616490	TuG1812G0500000021.01
5	2630820	2633012	TuG1812G0500000022.01
5	2667824	2668327	TuG1812G0500000023.01
5	2804000	2805314	TuG1812G0500000024.01
5	2890133	2891359	TuG1812G0500000025.01
5	3026917	3031797	TuG1812G0500000026.01
5	3132516	3136677	TuG1812G0500000027.01
5	3147951	3151726	TuG1812G0500000028.01
5	3153695	3158658	TuG1812G0500000029.01
5	3175382	3180212	TuG1812G0500000030.01
5	3205179	3205699	TuG1812G0500000031.01
5	3232517	3234977	TuG1812G0500000032.01
5	3235466	3237046	TuG1812G0500000033.01
5	3237794	3239874	TuG1812G0500000034.01
5	3247225	3249008	TuG1812G0500000035.01
5	3278225	3279937	TuG1812G0500000036.01
5	3419053	3423147	TuG1812G0500000037.01
5	3517701	3518607	TuG1812G0500000038.01
5	3593401	3598721	TuG1812G0500000039.01
5	3599191	3602966	TuG1812G0500000040.01
5	3663975	3670300	TuG1812G0500000041.01
5	3779715	3780601	TuG1812G0500000042.01
5	3915873	3918729	TuG1812G0500000043.01
5	4100409	4100791	TuG1812G0500000044.01
5	4137340	4138508	TuG1812G0500000045.01
5	4144591	4145917	TuG1812G0500000047.01
5	4145115	4148787	TuG1812G0500000046.01
5	4237266	4238414	TuG1812G0500000048.01
5	4480859	4481277	TuG1812G0500000049.01
5	4482181	4488068	TuG1812G0500000050.01
5	4490197	4494050	TuG1812G0500000051.01
5	4689011	4690778	TuG1812G0500000053.01
5	4689014	4690788	TuG1812G0500000052.01
5	4736812	4737528	TuG1812G0500000054.01
5	4791353	4795132	TuG1812G0500000055.01
5	4794458	4795683	TuG1812G0500000056.01
5	4795730	4800621	TuG1812G0500000057.01
5	4824708	4825345	TuG1812G0500000058.01
5	4838103	4842468	TuG1812G0500000059.01
5	5087016	5092796	TuG1812G0500000060.01
5	5093409	5095072	TuG1812G0500000061.01
5	5095649	5096392	TuG1812G0500000062.01
5	5345726	5347280	TuG1812G0500000063.01
5	5433346	5438297	TuG1812G0500000064.01
5	5443888	5444576	TuG1812G0500000065.01
5	5576712	5577662	TuG1812G0500000066.01
5	5581315	5582218	TuG1812G0500000067.01
5	5589194	5592498	TuG1812G0500000068.01
5	5643173	5653592	TuG1812G0500000069.01
5	5757992	5767992	TuG1812G0500000070.01
5	5782995	5784122	TuG1812G0500000071.01
5	5887076	5897528	TuG1812G0500000072.01
5	5919558	5932255	TuG1812G0500000073.01
5	5971842	5973914	TuG1812G0500000074.01
5	6011648	6016750	TuG1812G0500000075.01
5	6017588	6020162	TuG1812G0500000076.01
5	6037811	6040121	TuG1812G0500000077.01
5	6165546	6167777	TuG1812G0500000078.01
5	6224113	6236617	TuG1812G0500000079.01
5	6253709	6255737	TuG1812G0500000080.01
5	6274073	6278756	TuG1812G0500000081.01
5	6279448	6280014	TuG1812G0500000082.01
5	6298890	6302796	TuG1812G0500000083.01
5	6338148	6340185	TuG1812G0500000084.01
5	6347938	6362628	TuG1812G0500000085.01
5	6373359	6375252	TuG1812G0500000086.01
5	6379571	6380340	TuG1812G0500000087.01
5	6380930	6382735	TuG1812G0500000088.01
5	6455180	6461042	TuG1812G0500000089.01
5	6536665	6538244	TuG1812G0500000090.01
5	6540031	6540372	TuG1812G0500000091.01
5	6549236	6550987	TuG1812G0500000092.01
5	6561851	6566382	TuG1812G0500000093.01
5	6573151	6579544	TuG1812G0500000094.01
5	6583705	6586005	TuG1812G0500000095.01
5	6583968	6586803	TuG1812G0500000096.01
5	6596474	6596993	TuG1812G0500000097.01
5	6603442	6604056	TuG1812G0500000098.01
5	6612325	6620257	TuG1812G0500000099.01
5	6648351	6651043	TuG1812G0500000100.01
5	6666497	6671411	TuG1812G0500000101.01
5	6734832	6741284	TuG1812G0500000102.01
5	7235176	7239211	TuG1812G0500000103.01
5	7242314	7243027	TuG1812G0500000104.01
5	7290007	7290611	TuG1812G0500000105.01
5	7339017	7344088	TuG1812G0500000106.01
5	7528325	7545193	TuG1812G0500000107.01
5	7599367	7611690	TuG1812G0500000108.01
5	7627335	7634663	TuG1812G0500000109.01
5	7670198	7674802	TuG1812G0500000110.01
5	7833476	7836654	TuG1812G0500000111.01
5	7859078	7868988	TuG1812G0500000112.01
5	8020084	8020304	TuG1812G0500000113.01
5	8020344	8031569	TuG1812G0500000114.01
5	8034550	8035569	TuG1812G0500000115.01
5	8035819	8043886	TuG1812G0500000116.01
5	8045143	8045994	TuG1812G0500000117.01
5	8048098	8048347	TuG1812G0500000118.01
5	8112072	8121060	TuG1812G0500000119.01
5	8130397	8133527	TuG1812G0500000120.01
5	8239029	8241127	TuG1812G0500000121.01
5	8249961	8251981	TuG1812G0500000122.01
5	8261622	8263609	TuG1812G0500000123.01
5	8267598	8272523	TuG1812G0500000124.01
5	8277125	8278869	TuG1812G0500000125.01
5	8320937	8326250	TuG1812G0500000126.01
5	8327881	8332301	TuG1812G0500000127.01
5	8346921	8348472	TuG1812G0500000128.01
5	8437252	8439277	TuG1812G0500000129.01
5	8449563	8452587	TuG1812G0500000130.01
5	8459287	8460894	TuG1812G0500000131.01
5	8464304	8471075	TuG1812G0500000132.01
5	8471863	8478615	TuG1812G0500000133.01
5	8491468	8493447	TuG1812G0500000134.01
5	8494204	8496847	TuG1812G0500000135.01
5	8522056	8534783	TuG1812G0500000136.01
5	8538615	8541500	TuG1812G0500000137.01
5	8623982	8624395	TuG1812G0500000138.01
5	8717909	8719098	TuG1812G0500000139.01
5	8850070	8854086	TuG1812G0500000140.01
5	8858424	8860304	TuG1812G0500000141.01
5	8865227	8866107	TuG1812G0500000142.01
5	8870689	8872213	TuG1812G0500000143.01
5	8895101	8898021	TuG1812G0500000144.01
5	8957574	8960276	TuG1812G0500000145.01
5	8986496	8987258	TuG1812G0500000146.01
5	9004383	9008640	TuG1812G0500000147.01
5	9015031	9020792	TuG1812G0500000148.01
5	9140438	9142623	TuG1812G0500000149.01
5	9142724	9146677	TuG1812G0500000150.01
5	9202851	9206712	TuG1812G0500000151.01
5	9221812	9222749	TuG1812G0500000152.01
5	9248193	9249250	TuG1812G0500000153.01
5	9252613	9253079	TuG1812G0500000154.01
5	9302351	9308447	TuG1812G0500000155.01
5	9410853	9413108	TuG1812G0500000156.01
5	9413364	9417437	TuG1812G0500000157.01
5	9447714	9447915	TuG1812G0500000158.01
5	9495834	9497233	TuG1812G0500000159.01
5	9510051	9511638	TuG1812G0500000160.01
5	9534123	9534632	TuG1812G0500000161.01
5	9564730	9567190	TuG1812G0500000162.01
5	9608955	9610730	TuG1812G0500000163.01
5	9683732	9684106	TuG1812G0500000164.01
5	9693872	9694417	TuG1812G0500000165.01
5	9736552	9746579	TuG1812G0500000166.01
5	9771721	9775161	TuG1812G0500000167.01
5	9845231	9848531	TuG1812G0500000168.01
5	9890918	9894231	TuG1812G0500000169.01
5	10198724	10201758	TuG1812G0500000170.01
5	10445667	10446402	TuG1812G0500000171.01
5	10582007	10583193	TuG1812G0500000172.01
5	10586327	10587244	TuG1812G0500000173.01
5	10589109	10590649	TuG1812G0500000174.01
5	10793920	10796676	TuG1812G0500000175.01
5	10799393	10801638	TuG1812G0500000176.01
5	10809184	10811953	TuG1812G0500000177.01
5	10853500	10853863	TuG1812G0500000178.01
5	10867011	10867755	TuG1812G0500000179.01
5	10874585	10879630	TuG1812G0500000180.01
5	10924302	10930779	TuG1812G0500000181.01
5	10931932	10937690	TuG1812G0500000182.01
5	11279685	11284150	TuG1812G0500000183.01
5	11285825	11288218	TuG1812G0500000184.01
5	11393233	11395178	TuG1812G0500000185.01
5	11463256	11464125	TuG1812G0500000186.01
5	11823104	11827978	TuG1812G0500000187.01
5	11832214	11832456	TuG1812G0500000188.01
5	11837926	11838594	TuG1812G0500000189.01
5	11892420	11896139	TuG1812G0500000190.01
5	11919722	11922608	TuG1812G0500000191.01
5	11933742	11938256	TuG1812G0500000192.01
5	11938521	11943053	TuG1812G0500000193.01
5	12052757	12059472	TuG1812G0500000194.01
5	12227717	12232654	TuG1812G0500000195.01
5	12423686	12433030	TuG1812G0500000196.01
5	12479638	12488984	TuG1812G0500000197.01
5	12609970	12613905	TuG1812G0500000198.01
5	12614143	12615292	TuG1812G0500000199.01
5	12633803	12638990	TuG1812G0500000200.01
5	12646777	12647634	TuG1812G0500000201.01
5	12743346	12744788	TuG1812G0500000202.01
5	12788884	12790610	TuG1812G0500000203.01
5	12829447	12829806	TuG1812G0500000204.01
5	13133388	13135765	TuG1812G0500000205.01
5	13296352	13298085	TuG1812G0500000206.01
5	13425872	13427154	TuG1812G0500000207.01
5	13585925	13587865	TuG1812G0500000208.01
5	13611546	13613482	TuG1812G0500000209.01
5	13652345	13654117	TuG1812G0500000210.01
5	13663344	13670925	TuG1812G0500000211.01
5	13685650	13689712	TuG1812G0500000212.01
5	13694172	13695275	TuG1812G0500000213.01
5	13741130	13752499	TuG1812G0500000214.01
5	13774297	13775527	TuG1812G0500000215.01
5	13832140	13835189	TuG1812G0500000216.01
5	14015681	14019463	TuG1812G0500000217.01
5	14019709	14023263	TuG1812G0500000218.01
5	14033836	14037381	TuG1812G0500000219.01
5	14379684	14380347	TuG1812G0500000220.01
5	14717706	14721986	TuG1812G0500000221.01
5	14736656	14739625	TuG1812G0500000222.01
5	14931117	14931829	TuG1812G0500000223.01
5	15036665	15039303	TuG1812G0500000224.01
5	15248189	15252736	TuG1812G0500000225.01
5	15248189	15252736	TuG1812U0000310900.01
5	15278216	15279352	TuG1812G0500000226.01
5	15283972	15284283	TuG1812G0500000227.01
5	15291066	15292006	TuG1812G0500000228.01
5	15310000	15311048	TuG1812G0500000229.01
5	15330472	15331168	TuG1812G0500000230.01
5	15342200	15342976	TuG1812G0500000231.01
5	15353127	15353653	TuG1812G0500000232.01
5	15358567	15359117	TuG1812G0500000233.01
5	15376133	15376822	TuG1812G0500000234.01
5	15498091	15500936	TuG1812G0500000235.01
5	15605962	15606174	TuG1812G0500000236.01
5	15774281	15774829	TuG1812G0500000237.01
5	15909918	15912315	TuG1812G0500000238.01
5	16269526	16270197	TuG1812G0500000239.01
5	16270249	16273256	TuG1812G0500000240.01
5	16516130	16524759	TuG1812G0500000241.01
5	16945372	16951191	TuG1812G0500000242.01
5	16975044	16978421	TuG1812G0500000243.01
5	17272782	17276646	TuG1812G0500000244.01
5	17346844	17347149	TuG1812G0500000245.01
5	17403626	17404293	TuG1812G0500000246.01
5	17448390	17448932	TuG1812G0500000247.01
5	17461108	17461653	TuG1812G0500000248.01
5	17545397	17546862	TuG1812G0500000249.01
5	17664890	17678684	TuG1812G0500000250.01
5	17682000	17684216	TuG1812G0500000251.01
5	18400732	18407164	TuG1812G0500000252.01
5	18423563	18427207	TuG1812G0500000253.01
5	18449239	18452309	TuG1812G0500000254.01
5	18458493	18474398	TuG1812G0500000255.01
5	18686303	18687591	TuG1812G0500000256.01
5	19206538	19210756	TuG1812G0500000257.01
5	19339292	19340163	TuG1812G0500000258.01
5	19345303	19347260	TuG1812G0500000259.01
5	19417610	19419550	TuG1812G0500000260.01
5	19594785	19595785	TuG1812G0500000261.01
5	19705005	19706346	TuG1812G0500000262.01
5	19750082	19752205	TuG1812G0500000263.01
5	19759953	19761056	TuG1812G0500000264.01
5	20041218	20041652	TuG1812G0500000265.01
5	20105462	20105905	TuG1812G0500000266.01
5	20116775	20117071	TuG1812G0500000267.01
5	20119527	20122577	TuG1812G0500000268.01
5	20122922	20124393	TuG1812G0500000269.01
5	20126357	20129903	TuG1812G0500000270.01
5	20542400	20543789	TuG1812G0500000271.01
5	20544555	20548065	TuG1812G0500000272.01
5	20548829	20552651	TuG1812G0500000273.01
5	20579544	20579849	TuG1812G0500000274.01
5	20824849	20825803	TuG1812G0500000275.01
5	20868279	20872780	TuG1812G0500000276.01
5	20942883	20946817	TuG1812G0500000277.01
5	20949041	20952052	TuG1812G0500000278.01
5	21130748	21133303	TuG1812G0500000279.01
5	21168837	21169185	TuG1812G0500000280.01
5	21169953	21171788	TuG1812G0500000281.01
5	21191981	21195214	TuG1812G0500000282.01
5	21197007	21198398	TuG1812G0500000284.01
5	21198394	21210902	TuG1812G0500000283.01
5	21250558	21252183	TuG1812G0500000285.01
5	21260591	21263662	TuG1812G0500000286.01
5	21273646	21274868	TuG1812G0500000287.01
5	21277856	21284568	TuG1812G0500000288.01
5	21366560	21368428	TuG1812G0500000289.01
5	21377553	21381491	TuG1812G0500000290.01
5	21437817	21443223	TuG1812G0500000291.01
5	21453828	21457847	TuG1812G0500000292.01
5	21542722	21549417	TuG1812G0500000293.01
5	21556228	21557627	TuG1812G0500000294.01
5	21558184	21558780	TuG1812G0500000295.01
5	21664945	21667443	TuG1812G0500000296.01
5	21675728	21677328	TuG1812G0500000297.01
5	21707030	21710278	TuG1812G0500000298.01
5	21766973	21768789	TuG1812G0500000299.01
5	21801826	21806427	TuG1812G0500000300.01
5	21808166	21812798	TuG1812G0500000301.01
5	21813383	21813994	TuG1812G0500000302.01
5	21860203	21861794	TuG1812G0500000303.01
5	21864403	21872572	TuG1812G0500000304.01
5	21907918	21916815	TuG1812G0500000305.01
5	21959904	21960748	TuG1812G0500000306.01
5	21962358	21963560	TuG1812G0500000307.01
5	22095268	22098403	TuG1812G0500000308.01
5	22124175	22125353	TuG1812G0500000309.01
5	22393605	22395130	TuG1812G0500000310.01
5	22445840	22446235	TuG1812G0500000311.01
5	22468061	22472124	TuG1812G0500000312.01
5	22672085	22674203	TuG1812G0500000313.01
5	22676889	22681760	TuG1812G0500000314.01
5	22831737	22832180	TuG1812G0500000315.01
5	22902472	22904723	TuG1812G0500000316.01
5	23100217	23103304	TuG1812G0500000317.01
5	23577930	23582352	TuG1812G0500000318.01
5	23585734	23588519	TuG1812G0500000319.01
5	23597247	23598616	TuG1812G0500000320.01
5	23606217	23608406	TuG1812G0500000321.01
5	23800935	23803561	TuG1812G0500000322.01
5	23871331	23873978	TuG1812G0500000323.01
5	23884423	23888523	TuG1812G0500000324.01
5	24072268	24072900	TuG1812G0500000325.01
5	24104162	24111247	TuG1812G0500000326.01
5	24242168	24244319	TuG1812G0500000327.01
5	24283090	24288771	TuG1812G0500000328.01
5	24876408	24877881	TuG1812G0500000329.01
5	24935283	24942805	TuG1812G0500000330.01
5	25044794	25052316	TuG1812U0000147900.01
5	25240085	25247607	TuG1812U0000147600.01
5	25441258	25442580	TuG1812G0500000331.01
5	25568120	25569443	TuG1812U0000211800.01
5	25771438	25779139	TuG1812G0500000332.01
5	25961272	25962211	TuG1812G0500000333.01
5	26119657	26124439	TuG1812G0500000334.01
5	26128654	26130107	TuG1812G0500000335.01
5	26994929	27001186	TuG1812G0500000337.01
5	27002195	27005102	TuG1812G0500000338.01
5	27171215	27172966	TuG1812G0500000339.01
5	27187398	27188002	TuG1812G0500000340.01
5	27195642	27196153	TuG1812G0500000341.01
5	27222287	27224330	TuG1812G0500000342.01
5	27225856	27230774	TuG1812G0500000343.01
5	27315653	27316105	TuG1812U0000039800.01
5	27573666	27574142	TuG1812U0000040300.01
5	27573666	27574142	TuG1812G0500000344.01
5	27719971	27721049	TuG1812G0500000345.01
5	27738072	27740119	TuG1812G0500000346.01
5	27741001	27742276	TuG1812G0500000347.01
5	27754897	27761375	TuG1812G0500000348.01
5	27762021	27770316	TuG1812G0500000349.01
5	27778892	27780586	TuG1812G0500000350.01
5	27781814	27782281	TuG1812G0500000351.01
5	28178592	28180724	TuG1812G0500000352.01
5	28183998	28184645	TuG1812G0500000353.01
5	28311187	28312746	TuG1812G0500000354.01
5	28365178	28366746	TuG1812G0500000356.01
5	28365211	28366746	TuG1812G0500000355.01
5	28367629	28370412	TuG1812G0500000357.01
5	28397092	28399172	TuG1812G0500000358.01
5	28405291	28405752	TuG1812G0500000359.01
5	28746913	28748511	TuG1812G0500000360.01
5	28976000	28976733	TuG1812G0500000361.01
5	28989011	28992951	TuG1812G0500000362.01
5	29000703	29002801	TuG1812G0500000363.01
5	29005626	29009207	TuG1812G0500000364.01
5	29234845	29244628	TuG1812G0500000365.01
5	29251660	29257502	TuG1812G0500000366.01
5	29271966	29274381	TuG1812G0500000367.01
5	29351000	29353435	TuG1812G0500000368.01
5	29814976	29816947	TuG1812G0500000369.01
5	30260934	30261805	TuG1812G0500000370.01
5	30272478	30273164	TuG1812G0500000371.01
5	30279747	30280230	TuG1812G0500000372.01
5	30394366	30394701	TuG1812G0500000373.01
5	30563379	30566401	TuG1812G0500000374.01
5	31094067	31096446	TuG1812G0500000375.01
5	31219265	31220834	TuG1812G0500000376.01
5	31409648	31410767	TuG1812G0500000377.01
5	31535498	31536297	TuG1812G0500000378.01
5	31540921	31542004	TuG1812G0500000379.01
5	31547294	31551188	TuG1812G0500000380.01
5	31553738	31556576	TuG1812G0500000381.01
5	31562747	31563789	TuG1812G0500000382.01
5	31564434	31565414	TuG1812G0500000383.01
5	31658543	31659984	TuG1812G0500000384.01
5	31869281	31873584	TuG1812G0500000385.01
5	31874755	31877064	TuG1812G0500000386.01
5	31881193	31883921	TuG1812G0500000387.01
5	31922419	31929614	TuG1812G0500000388.01
5	32332142	32334418	TuG1812G0500000389.01
5	32336045	32337757	TuG1812G0500000390.01
5	32395839	32396253	TuG1812G0500000391.01
5	32397658	32399374	TuG1812G0500000392.01
5	32427087	32429544	TuG1812G0500000393.01
5	32430590	32432968	TuG1812G0500000394.01
5	32438587	32439534	TuG1812G0500000395.01
5	32439231	32439880	TuG1812G0500000396.01
5	32441972	32445253	TuG1812G0500000397.01
5	32731868	32736816	TuG1812G0500000398.01
5	32739523	32743513	TuG1812G0500000399.01
5	32744248	32748494	TuG1812G0500000400.01
5	32919260	32920804	TuG1812G0500000401.01
5	33145693	33148458	TuG1812G0500000402.01
5	33150862	33152922	TuG1812G0500000403.01
5	33156708	33158523	TuG1812G0500000404.01
5	33159120	33161130	TuG1812G0500000405.01
5	33161525	33163848	TuG1812G0500000406.01
5	33165525	33169379	TuG1812G0500000407.01
5	33174495	33178429	TuG1812G0500000408.01
5	33217412	33220513	TuG1812G0500000409.01
5	33228315	33230515	TuG1812G0500000410.01
5	33273081	33278615	TuG1812G0500000411.01
5	33360309	33366422	TuG1812G0500000412.01
5	34637221	34637676	TuG1812G0500000413.01
5	34681043	34681627	TuG1812G0500000414.01
5	34693245	34693638	TuG1812G0500000415.01
5	34980119	34981268	TuG1812G0500000416.01
5	35276091	35276737	TuG1812U0000037300.01
5	35315729	35316685	TuG1812G0500000417.01
5	35671235	35676540	TuG1812G0500000418.01
5	36372554	36373890	TuG1812G0500000419.01
5	36382688	36383265	TuG1812G0500000420.01
5	36485563	36486519	TuG1812G0500000421.01
5	36732375	36733334	TuG1812G0500000423.01
5	36816832	36819404	TuG1812G0500000424.01
5	37591545	37592612	TuG1812G0500000425.01
5	37600918	37601388	TuG1812G0500000426.01
5	37690173	37691321	TuG1812G0500000427.01
5	37718151	37720330	TuG1812G0500000428.01
5	38275022	38275252	TuG1812G0500000429.01
5	38434327	38436555	TuG1812G0500000430.01
5	38577287	38577706	TuG1812G0500000431.01
5	38794324	38799958	TuG1812G0500000432.01
5	38829333	38831327	TuG1812G0500000433.01
5	38832925	38835470	TuG1812G0500000434.01
5	38835688	38839933	TuG1812G0500000435.01
5	38863458	38864084	TuG1812G0500000436.01
5	38935818	38936976	TuG1812G0500000437.01
5	38966000	38968270	TuG1812G0500000438.01
5	38971710	38975008	TuG1812G0500000439.01
5	39218498	39219866	TuG1812G0500000440.01
5	39743335	39743844	TuG1812G0500000441.01
5	39744442	39744777	TuG1812G0500000442.01
5	39747578	39753105	TuG1812G0500000443.01
5	39760672	39762212	TuG1812G0500000444.01
5	39764678	39765148	TuG1812G0500000445.01
5	39769562	39774424	TuG1812G0500000446.01
5	39774930	39776430	TuG1812G0500000447.01
5	39993614	39994705	TuG1812G0500000448.01
5	40008043	40009011	TuG1812G0500000449.01
5	40010918	40011862	TuG1812G0500000450.01
5	40013956	40019043	TuG1812G0500000451.01
5	40209413	40215178	TuG1812G0500000452.01
5	40264030	40269460	TuG1812G0500000453.01
5	40414035	40414688	TuG1812G0500000454.01
5	40599183	40601700	TuG1812G0500000455.01
5	40615243	40618941	TuG1812G0500000456.01
5	40619033	40620784	TuG1812G0500000457.01
5	40917052	40920954	TuG1812G0500000458.01
5	40968113	40969848	TuG1812G0500000459.01
5	40972303	40975679	TuG1812G0500000460.01
5	41166836	41171215	TuG1812G0500000461.01
5	41223437	41227399	TuG1812U0000021500.01
5	41260277	41262819	TuG1812U0000021300.01
5	41689038	41695050	TuG1812G0500000462.01
5	41702203	41703782	TuG1812G0500000463.01
5	41717745	41720344	TuG1812G0500000464.01
5	41720888	41721125	TuG1812G0500000465.01
5	41789482	41789703	TuG1812G0500000466.01
5	41836048	41839657	TuG1812G0500000468.01
5	41839360	41842670	TuG1812G0500000467.01
5	41858533	41862089	TuG1812G0500000469.01
5	41949120	41953082	TuG1812G0500000470.01
5	41949120	41953082	TuG1812U0000027200.01
5	41992421	41994963	TuG1812U0000027400.01
5	41992421	41994963	TuG1812G0500000471.01
5	42682450	42687279	TuG1812G0500000472.01
5	42983746	42984846	TuG1812G0500000473.01
5	43005408	43007459	TuG1812G0500000474.01
5	43033486	43037363	TuG1812G0500000475.01
5	43041990	43056525	TuG1812G0500000476.01
5	43061493	43064206	TuG1812G0500000477.01
5	43067296	43068000	TuG1812G0500000478.01
5	43072084	43076448	TuG1812G0500000479.01
5	43091844	43092329	TuG1812G0500000480.01
5	43130836	43133019	TuG1812G0500000481.01
5	43281874	43284497	TuG1812G0500000482.01
5	43310143	43311068	TuG1812G0500000483.01
5	43312996	43313863	TuG1812G0500000484.01
5	43717260	43717953	TuG1812G0500000485.01
5	43718107	43719088	TuG1812G0500000486.01
5	43755301	43756864	TuG1812G0500000487.01
5	44349934	44351037	TuG1812G0500000488.01
5	44507776	44509796	TuG1812G0500000489.01
5	44517113	44518053	TuG1812G0500000490.01
5	44534332	44537578	TuG1812G0500000491.01
5	44540314	44541878	TuG1812G0500000492.01
5	44548881	44549605	TuG1812G0500000493.01
5	44570252	44573896	TuG1812G0500000494.01
5	44677174	44681028	TuG1812G0500000495.01
5	44725158	44725376	TuG1812G0500000496.01
5	44726279	44729923	TuG1812G0500000497.01
5	44843508	44844655	TuG1812G0500000498.01
5	44859626	44860130	TuG1812G0500000499.01
5	44866738	44878695	TuG1812G0500000500.01
5	45156498	45156939	TuG1812G0500000501.01
5	45157601	45159816	TuG1812G0500000502.01
5	45167021	45169568	TuG1812G0500000503.01
5	45181773	45182253	TuG1812G0500000504.01
5	45184591	45185264	TuG1812G0500000505.01
5	45193282	45196422	TuG1812G0500000506.01
5	45199330	45206083	TuG1812G0500000507.01
5	45244941	45246078	TuG1812G0500000508.01
5	45364643	45366238	TuG1812G0500000509.01
5	45368602	45371240	TuG1812G0500000510.01
5	45381080	45382743	TuG1812G0500000511.01
5	45447158	45449355	TuG1812G0500000512.01
5	45573088	45573739	TuG1812G0500000513.01
5	45612861	45614138	TuG1812G0500000514.01
5	45634252	45638313	TuG1812G0500000515.01
5	45640786	45645103	TuG1812G0500000516.01
5	45646630	45659662	TuG1812G0500000517.01
5	45716739	45721516	TuG1812G0500000518.01
5	45728737	45730672	TuG1812G0500000519.01
5	45735200	45736097	TuG1812G0500000520.01
5	45739730	45744101	TuG1812G0500000521.01
5	45744312	45763982	TuG1812G0500000522.01
5	46191560	46194462	TuG1812G0500000523.01
5	46268879	46271708	TuG1812G0500000524.01
5	46333075	46333825	TuG1812G0500000525.01
5	46346386	46346925	TuG1812G0500000526.01
5	46347487	46348157	TuG1812G0500000527.01
5	46562837	46564125	TuG1812G0500000528.01
5	46754607	46755081	TuG1812G0500000529.01
5	46827370	46832593	TuG1812G0500000530.01
5	46853166	46858388	TuG1812G0500000531.01
5	46969985	46976051	TuG1812G0500000532.01
5	46978284	46981207	TuG1812G0500000533.01
5	47241717	47242643	TuG1812G0500000534.01
5	47383971	47386888	TuG1812G0500000535.01
5	47395171	47402637	TuG1812G0500000536.01
5	47501671	47503067	TuG1812G0500000537.01
5	47692146	47699136	TuG1812G0500000538.01
5	47802183	47807776	TuG1812G0500000539.01
5	47809627	47810566	TuG1812G0500000540.01
5	47812045	47813540	TuG1812G0500000541.01
5	47819132	47819929	TuG1812G0500000542.01
5	47886109	47887698	TuG1812G0500000543.01
5	47918460	47919614	TuG1812G0500000544.01
5	47987953	47988553	TuG1812G0500000545.01
5	48063612	48069768	TuG1812G0500000546.01
5	48105939	48106673	TuG1812G0500000547.01
5	48119819	48120370	TuG1812G0500000548.01
5	48128204	48128782	TuG1812G0500000549.01
5	48160439	48160999	TuG1812G0500000550.01
5	48245028	48251758	TuG1812G0500000551.01
5	48377473	48382752	TuG1812G0500000552.01
5	48517095	48520666	TuG1812G0500000553.01
5	48521334	48523910	TuG1812G0500000554.01
5	48528519	48532132	TuG1812G0500000555.01
5	48550370	48552194	TuG1812G0500000556.01
5	48564538	48565473	TuG1812G0500000557.01
5	48567710	48568768	TuG1812G0500000558.01
5	48572460	48576831	TuG1812G0500000560.01
5	48572465	48577264	TuG1812G0500000559.01
5	48589420	48594030	TuG1812G0500000561.01
5	48675932	48678602	TuG1812G0500000562.01
5	48925677	48936823	TuG1812G0500000563.01
5	48996004	48997763	TuG1812G0500000564.01
5	49090491	49101509	TuG1812G0500000565.01
5	49232407	49234236	TuG1812G0500000566.01
5	49301165	49306774	TuG1812G0500000567.01
5	49492148	49496306	TuG1812G0500000568.01
5	49497099	49499070	TuG1812G0500000569.01
5	49499764	49500085	TuG1812G0500000570.01
5	49503247	49514430	TuG1812G0500000571.01
5	49529754	49534853	TuG1812G0500000572.01
5	49537690	49539089	TuG1812G0500000573.01
5	49551082	49552675	TuG1812G0500000574.01
5	49932734	49933705	TuG1812G0500000575.01
5	49943237	49946380	TuG1812G0500000576.01
5	50055989	50057361	TuG1812G0500000577.01
5	50299746	50306725	TuG1812G0500000578.01
5	50970449	50977203	TuG1812G0500000579.01
5	51036049	51038850	TuG1812G0500000580.01
5	51037863	51041646	TuG1812G0500000581.01
5	51041977	51045250	TuG1812G0500000583.01
5	51042329	51045250	TuG1812G0500000582.01
5	51046316	51047691	TuG1812G0500000584.01
5	51069062	51072869	TuG1812G0500000585.01
5	51073874	51075801	TuG1812G0500000586.01
5	51077491	51078745	TuG1812G0500000587.01
5	51152408	51159632	TuG1812G0500000588.01
5	51325412	51329228	TuG1812G0500000589.01
5	51332940	51334880	TuG1812G0500000590.01
5	51365495	51366618	TuG1812G0500000591.01
5	51388702	51388950	TuG1812G0500000592.01
5	51397413	51403621	TuG1812G0500000593.01
5	51467699	51469639	TuG1812G0500000594.01
5	51473351	51477157	TuG1812G0500000595.01
5	51490608	51491180	TuG1812G0500000596.01
5	51492184	51498663	TuG1812G0500000597.01
5	51503791	51510276	TuG1812G0500000598.01
5	51510795	51511202	TuG1812G0500000599.01
5	51513797	51516150	TuG1812G0500000600.01
5	51578952	51580930	TuG1812G0500000601.01
5	51598920	51599772	TuG1812G0500000602.01
5	51873948	51880897	TuG1812G0500000603.01
5	51896292	51898471	TuG1812G0500000604.01
5	52118624	52120814	TuG1812G0500000605.01
5	52331172	52331513	TuG1812G0500000606.01
5	52789171	52790529	TuG1812G0500000607.01
5	52906746	52907333	TuG1812G0500000608.01
5	52914728	52918008	TuG1812G0500000609.01
5	52919303	52920069	TuG1812G0500000610.01
5	53124584	53126301	TuG1812G0500000611.01
5	53200945	53211412	TuG1812G0500000612.01
5	53218497	53220499	TuG1812G0500000613.01
5	53245121	53245522	TuG1812G0500000614.01
5	53262603	53263212	TuG1812G0500000615.01
5	53265386	53272991	TuG1812G0500000616.01
5	53273582	53279655	TuG1812G0500000617.01
5	53320467	53321256	TuG1812G0500000618.01
5	53322370	53338151	TuG1812G0500000619.01
5	53342066	53342717	TuG1812G0500000620.01
5	53346410	53356956	TuG1812G0500000621.01
5	53363540	53363936	TuG1812G0500000622.01
5	53398376	53398603	TuG1812G0500000623.01
5	53502144	53509468	TuG1812G0500000624.01
5	53510138	53510803	TuG1812G0500000625.01
5	53513518	53515158	TuG1812G0500000627.01
5	53515062	53515422	TuG1812G0500000626.01
5	53516012	53518816	TuG1812G0500000628.01
5	54189663	54191953	TuG1812G0500000629.01
5	54233505	54234494	TuG1812G0500000630.01
5	54241231	54242282	TuG1812G0500000631.01
5	54396103	54407954	TuG1812G0500000632.01
5	54617696	54619971	TuG1812G0500000633.01
5	54620430	54624750	TuG1812G0500000634.01
5	54917573	54924481	TuG1812G0500000635.01
5	55086141	55093042	TuG1812U0000206300.01
5	55086141	55093042	TuG1812G0500000636.01
5	55436408	55440414	TuG1812G0500000637.01
5	55448209	55450123	TuG1812G0500000638.01
5	56083644	56084096	TuG1812G0500000639.01
5	56169502	56169954	TuG1812G0500000640.01
5	56186690	56189449	TuG1812G0500000641.01
5	56858566	56861342	TuG1812G0500000642.01
5	56948726	56950241	TuG1812G0500000643.01
5	57078310	57079494	TuG1812G0500000644.01
5	57111898	57114404	TuG1812G0500000645.01
5	57115298	57115576	TuG1812G0500000646.01
5	57118909	57125324	TuG1812G0500000647.01
5	57146362	57154397	TuG1812G0500000648.01
5	57146362	57154397	TuG1812U0000310300.01
5	57183397	57184993	TuG1812G0500000649.01
5	57263718	57266617	TuG1812G0500000650.01
5	57267984	57271146	TuG1812G0500000651.01
5	57542216	57550510	TuG1812G0500000652.01
5	57702089	57709611	TuG1812G0500000653.01
5	57711142	57716621	TuG1812G0500000654.01
5	57945647	57946948	TuG1812G0500000655.01
5	57970906	57975899	TuG1812G0500000656.01
5	58046659	58059188	TuG1812G0500000657.01
5	58292313	58311802	TuG1812G0500000658.01
5	58461840	58464570	TuG1812G0500000659.01
5	58465631	58470316	TuG1812G0500000660.01
5	58486822	58493104	TuG1812G0500000661.01
5	58816230	58818017	TuG1812G0500000662.01
5	59634707	59641166	TuG1812G0500000663.01
5	59647042	59647326	TuG1812G0500000664.01
5	59647633	59649219	TuG1812G0500000665.01
5	59701992	59702748	TuG1812G0500000666.01
5	59714344	59715871	TuG1812G0500000667.01
5	60120279	60121086	TuG1812G0500000668.01
5	60121702	60122308	TuG1812G0500000669.01
5	60134903	60135451	TuG1812G0500000670.01
5	60539772	60541228	TuG1812G0500000671.01
5	60545220	60550015	TuG1812G0500000672.01
5	60604205	60605707	TuG1812G0500000673.01
5	60675532	60679078	TuG1812G0500000674.01
5	60679479	60683647	TuG1812G0500000675.01
5	60753103	60755123	TuG1812G0500000676.01
5	60946112	60946867	TuG1812G0500000677.01
5	60949263	60954225	TuG1812G0500000678.01
5	61199268	61199807	TuG1812G0500000679.01
5	61217974	61222099	TuG1812G0500000680.01
5	61341793	61347697	TuG1812G0500000681.01
5	61723480	61734345	TuG1812G0500000682.01
5	62600318	62602867	TuG1812G0500000683.01
5	62607246	62608073	TuG1812G0500000684.01
5	62853208	62857602	TuG1812G0500000685.01
5	62857827	62863939	TuG1812G0500000686.01
5	62865107	62868765	TuG1812G0500000687.01
5	62938402	62940978	TuG1812G0500000688.01
5	63025921	63027113	TuG1812G0500000689.01
5	63398820	63402091	TuG1812G0500000690.01
5	63505391	63505640	TuG1812G0500000691.01
5	63572108	63573623	TuG1812G0700004970.01
5	64220802	64229529	TuG1812G0500000692.01
5	64362331	64363203	TuG1812G0500000693.01
5	64986249	64987730	TuG1812G0500000694.01
5	64992106	64997357	TuG1812G0500000695.01
5	65000449	65006897	TuG1812G0500000696.01
5	65007444	65012961	TuG1812G0500000697.01
5	65146065	65148783	TuG1812G0500000698.01
5	65243402	65243647	TuG1812G0500000699.01
5	65243615	65249436	TuG1812G0500000700.01
5	65250710	65252376	TuG1812G0500000701.01
5	65450992	65452384	TuG1812G0500000702.01
5	65455955	65456966	TuG1812G0500000703.01
5	65496482	65497384	TuG1812G0500000704.01
5	65996108	65999098	TuG1812G0500000705.01
5	66046145	66047185	TuG1812G0500000706.01
5	66536984	66537307	TuG1812G0500000707.01
5	66543697	66545884	TuG1812G0500000708.01
5	66584344	66586020	TuG1812G0500000709.01
5	66670987	66674374	TuG1812G0500000710.01
5	66675618	66681833	TuG1812G0500000711.01
5	66689029	66692372	TuG1812G0500000712.01
5	66818223	66818812	TuG1812G0500000713.01
5	66862154	66863165	TuG1812G0500000714.01
5	67169807	67173405	TuG1812G0500000715.01
5	67837319	67838223	TuG1812G0500000717.01
5	67837319	67838379	TuG1812G0500000716.01
5	67842460	67843301	TuG1812G0500000718.01
5	67931880	67934020	TuG1812G0500000719.01
5	68176474	68177212	TuG1812G0500000720.01
5	68197333	68202022	TuG1812G0500000721.01
5	68249456	68256084	TuG1812G0500000722.01
5	68256297	68262548	TuG1812G0500000723.01
5	68266610	68270272	TuG1812G0500000724.01
5	68725000	68725347	TuG1812G0500000725.01
5	69070688	69073891	TuG1812G0500000726.01
5	69103217	69103955	TuG1812G0500000727.01
5	69297352	69297554	TuG1812G0500000728.01
5	69297825	69302213	TuG1812G0500000730.01
5	69297825	69302213	TuG1812U0000106200.01
5	69301099	69303575	TuG1812U0000105900.01
5	69301099	69303575	TuG1812G0500000729.01
5	69305337	69307336	TuG1812G0500000731.01
5	69699806	69704354	TuG1812G0500000732.01
5	69707456	69709248	TuG1812G0500000733.01
5	69822433	69825731	TuG1812G0500000734.01
5	69823755	69830105	TuG1812G0500000735.01
5	69831722	69832553	TuG1812G0500000736.01
5	69851928	69855041	TuG1812G0500000737.01
5	69970929	69973198	TuG1812G0500000738.01
5	69977350	69979926	TuG1812G0500000739.01
5	70058285	70059637	TuG1812G0500000741.01
5	70058300	70059637	TuG1812G0500000740.01
5	70639217	70640429	TuG1812G0500000742.01
5	70690368	70695376	TuG1812G0500000743.01
5	70709520	70710864	TuG1812G0500000744.01
5	70713458	70718471	TuG1812G0500000745.01
5	70807528	70808089	TuG1812G0500000746.01
5	70855704	70874635	TuG1812G0500000747.01
5	70972988	70978907	TuG1812G0500000748.01
5	70983471	70984885	TuG1812G0500000749.01
5	71157965	71165270	TuG1812G0500000750.01
5	71170056	71173859	TuG1812G0500000751.01
5	71223794	71225720	TuG1812G0500000752.01
5	71372214	71379301	TuG1812G0500000753.01
5	71606945	71608555	TuG1812G0500000754.01
5	71841839	71848337	TuG1812G0500000755.01
5	71849960	71850540	TuG1812G0500000756.01
5	71971087	71972620	TuG1812G0500000757.01
5	72381394	72383440	TuG1812G0500000758.01
5	72385196	72387308	TuG1812G0500000759.01
5	72418017	72428535	TuG1812G0500000760.01
5	72496019	72497544	TuG1812G0500000761.01
5	72553323	72554401	TuG1812G0500000762.01
5	72556282	72558429	TuG1812G0500000763.01
5	72559558	72562995	TuG1812G0500000764.01
5	72571608	72572308	TuG1812G0500000765.01
5	72572566	72579906	TuG1812G0500000766.01
5	72606497	72610929	TuG1812G0500000767.01
5	73589782	73593213	TuG1812G0500000768.01
5	74075928	74077101	TuG1812G0500000769.01
5	75048402	75049330	TuG1812G0500000770.01
5	75051485	75051893	TuG1812G0500000771.01
5	75054160	75056442	TuG1812G0500000772.01
5	75057310	75057609	TuG1812G0500000773.01
5	75061616	75065314	TuG1812G0500000774.01
5	75336380	75341163	TuG1812G0500000775.01
5	75598779	75602350	TuG1812G0500000776.01
5	75604377	75607116	TuG1812G0500000777.01
5	75607971	75609802	TuG1812G0500000778.01
5	75614598	75619092	TuG1812G0500000779.01
5	75697701	75702058	TuG1812G0500000780.01
5	75763219	75763425	TuG1812G0500000781.01
5	75764058	75766919	TuG1812G0500000782.01
5	75774874	75779059	TuG1812G0500000783.01
5	75792610	75793113	TuG1812G0500000784.01
5	75838338	75842209	TuG1812G0500000785.01
5	75845806	75859489	TuG1812G0500000786.01
5	75976880	75977637	TuG1812G0500000787.01
5	76259555	76261638	TuG1812G0500000788.01
5	76292466	76293380	TuG1812G0500000789.01
5	76293909	76302143	TuG1812G0500000790.01
5	76809788	76815467	TuG1812G0500000791.01
5	77120409	77122998	TuG1812G0500000792.01
5	77124453	77127806	TuG1812G0500000793.01
5	77383762	77385046	TuG1812G0500000794.01
5	77414926	77417414	TuG1812G0500000795.01
5	77419107	77420954	TuG1812G0500000796.01
5	77424321	77425919	TuG1812G0500000797.01
5	77570981	77573175	TuG1812G0500000798.01
5	77667298	77672596	TuG1812G0500000799.01
5	77674250	77674635	TuG1812G0500000800.01
5	77674314	77678193	TuG1812G0500000801.01
5	77855799	77860496	TuG1812G0500000802.01
5	78541900	78544652	TuG1812G0500000803.01
5	78775232	78778446	TuG1812G0500000804.01
5	78778911	78780065	TuG1812G0500000805.01
5	78784063	78791048	TuG1812G0500000806.01
5	79007984	79008217	TuG1812G0500000807.01
5	79500321	79504756	TuG1812G0500000808.01
5	79521362	79523561	TuG1812G0500000809.01
5	79723233	79730429	TuG1812G0500000810.01
5	79793237	79794968	TuG1812G0500000811.01
5	79803071	79803400	TuG1812G0500000812.01
5	80581971	80584037	TuG1812G0500000813.01
5	80583022	80589562	TuG1812G0500000814.01
5	80592460	80594749	TuG1812G0500000815.01
5	80956134	80960554	TuG1812G0500000816.01
5	80962489	80964948	TuG1812G0500000817.01
5	80966808	80978596	TuG1812G0500000818.01
5	81187565	81196695	TuG1812G0500000819.01
5	81617027	81617389	TuG1812G0500000820.01
5	81622750	81623197	TuG1812G0500000821.01
5	81799552	81803400	TuG1812G0500000822.01
5	81953386	81954273	TuG1812G0500000823.01
5	81975302	81987253	TuG1812G0500000824.01
5	81993507	81997928	TuG1812G0500000825.01
5	82059203	82060068	TuG1812G0500000826.01
5	82122927	82127943	TuG1812G0500000827.01
5	82140942	82141760	TuG1812G0500000828.01
5	82144053	82145550	TuG1812G0500000829.01
5	82147483	82152652	TuG1812G0500000830.01
5	82982487	82985202	TuG1812G0500000831.01
5	83318918	83319336	TuG1812G0500000832.01
5	83320277	83321531	TuG1812G0500000833.01
5	83322023	83323635	TuG1812G0500000834.01
5	83324285	83327431	TuG1812G0500000835.01
5	83498909	83503106	TuG1812G0500000836.01
5	83576164	83577479	TuG1812G0500000837.01
5	83578281	83579514	TuG1812G0500000838.01
5	83580351	83580632	TuG1812G0500000839.01
5	83580814	83581096	TuG1812G0500000840.01
5	83616065	83621129	TuG1812G0500000841.01
5	83765377	83771209	TuG1812G0500000842.01
5	83807030	83808338	TuG1812G0500000843.01
5	83911559	83913399	TuG1812G0500000844.01
5	84343575	84345461	TuG1812G0500000845.01
5	84582902	84583582	TuG1812G0500000846.01
5	84585742	84593108	TuG1812G0500000847.01
5	84599746	84601643	TuG1812G0500000848.01
5	84695386	84697087	TuG1812G0500000849.01
5	84701161	84703938	TuG1812G0500000850.01
5	84711202	84714417	TuG1812G0500000851.01
5	84795923	84796695	TuG1812G0500000852.01
5	84796259	84796695	TuG1812G0500000853.01
5	85649267	85657270	TuG1812G0500000854.01
5	85670354	85696762	TuG1812G0500000855.01
5	86346575	86347401	TuG1812G0500000856.01
5	86365608	86368235	TuG1812G0500000857.01
5	86370207	86373529	TuG1812G0500000858.01
5	86772802	86777081	TuG1812G0500000859.01
5	86777328	86781330	TuG1812G0500000860.01
5	87209217	87213437	TuG1812G0500000861.01
5	87527561	87530494	TuG1812G0500000862.01
5	87850793	87858433	TuG1812G0500000863.01
5	87863026	87868600	TuG1812G0500000864.01
5	87875776	87877130	TuG1812G0500000865.01
5	88671623	88672167	TuG1812G0500000866.01
5	89031707	89033081	TuG1812G0500000867.01
5	89460332	89461533	TuG1812G0500000868.01
5	89461903	89463260	TuG1812G0500000870.01
5	89462365	89463929	TuG1812G0500000869.01
5	89581943	89585059	TuG1812G0500000871.01
5	89586667	89586908	TuG1812G0500000872.01
5	89617939	89618592	TuG1812G0500000873.01
5	89843976	89846098	TuG1812G0500000874.01
5	89968887	89970586	TuG1812G0500000875.01
5	90271290	90272688	TuG1812G0500000877.01
5	90271344	90272688	TuG1812G0500000876.01
5	90536820	90539727	TuG1812G0500000878.01
5	90683998	90685644	TuG1812G0500000879.01
5	90724796	90729395	TuG1812G0500000880.01
5	91051367	91055736	TuG1812G0500000881.01
5	91057544	91060546	TuG1812G0500000882.01
5	91316494	91336028	TuG1812G0500000883.01
5	91336775	91337921	TuG1812G0500000884.01
5	91462846	91473709	TuG1812G0500000885.01
5	91982622	91983455	TuG1812G0500000886.01
5	92632858	92635365	TuG1812G0500000887.01
5	92991649	92992509	TuG1812G0500000888.01
5	93523787	93524827	TuG1812G0500000889.01
5	93531518	93535267	TuG1812G0500000890.01
5	94264345	94265997	TuG1812G0500000891.01
5	94308978	94316050	TuG1812G0500000892.01
5	94319006	94319866	TuG1812G0500000893.01
5	94492910	94493829	TuG1812G0500000894.01
5	94810926	94811827	TuG1812G0500000895.01
5	94865777	94868750	TuG1812G0500000896.01
5	94871263	94872177	TuG1812G0500000897.01
5	94873678	94877107	TuG1812G0500000898.01
5	94922730	94923738	TuG1812G0500000899.01
5	94998290	95006584	TuG1812G0500000900.01
5	95036384	95040307	TuG1812G0500000901.01
5	95946235	95948237	TuG1812G0500000902.01
5	96549232	96554111	TuG1812G0500000903.01
5	96876732	96880401	TuG1812G0500000904.01
5	96910466	96917329	TuG1812G0500000905.01
5	97264632	97266665	TuG1812G0500000906.01
5	97531849	97535290	TuG1812G0500000907.01
5	98178007	98178507	TuG1812G0500000908.01
5	98199116	98220660	TuG1812G0500000909.01
5	98697191	98702848	TuG1812G0500000910.01
5	99869195	99869564	TuG1812G0500000911.01
5	99872234	99880162	TuG1812G0500000912.01
5	100805166	100810118	TuG1812G0500000913.01
5	101173127	101173915	TuG1812G0500000914.01
5	101175038	101176844	TuG1812G0500000915.01
5	101394330	101398848	TuG1812G0500000916.01
5	102209542	102210818	TuG1812G0500000917.01
5	102634767	102635186	TuG1812G0500000918.01
5	102930861	102931667	TuG1812G0500000919.01
5	103234152	103240401	TuG1812G0500000920.01
5	104150647	104153957	TuG1812G0500000921.01
5	104188588	104189376	TuG1812G0500000922.01
5	104272354	104275151	TuG1812G0500000923.01
5	104332384	104336334	TuG1812G0500000924.01
5	104336395	104339262	TuG1812G0500000925.01
5	104359845	104371323	TuG1812G0500000926.01
5	104426544	104428033	TuG1812G0500000927.01
5	104562433	104563536	TuG1812G0500000928.01
5	105086242	105087442	TuG1812G0500000929.01
5	105088156	105088565	TuG1812G0500000930.01
5	105090101	105096710	TuG1812G0500000931.01
5	105469006	105472705	TuG1812G0500000932.01
5	105711776	105712675	TuG1812G0500000933.01
5	105928765	105929496	TuG1812G0500000934.01
5	106180675	106183555	TuG1812G0500000935.01
5	106180740	106183555	TuG1812G0500000936.01
5	106265752	106267494	TuG1812G0500000937.01
5	107843351	107845475	TuG1812G0500000938.01
5	107854145	107854790	TuG1812G0500000939.01
5	108056637	108057194	TuG1812G0500000940.01
5	108065933	108069839	TuG1812G0500000941.01
5	108070139	108076130	TuG1812G0500000942.01
5	108079456	108080046	TuG1812G0500000943.01
5	108406370	108414914	TuG1812G0500000944.01
5	108444533	108445604	TuG1812G0500000945.01
5	108446096	108448536	TuG1812G0500000946.01
5	108462253	108465109	TuG1812G0500000947.01
5	108481157	108483905	TuG1812G0500000948.01
5	108647572	108651964	TuG1812G0500000949.01
5	108652089	108653237	TuG1812G0500000950.01
5	108654527	108660127	TuG1812G0500000951.01
5	108661477	108665876	TuG1812G0500000952.01
5	108713968	108721868	TuG1812G0500000953.01
5	109167920	109173798	TuG1812G0500000954.01
5	109198694	109199779	TuG1812G0500000955.01
5	109745015	109745689	TuG1812G0500000956.01
5	110290017	110292125	TuG1812G0500000958.01
5	110295800	110297674	TuG1812G0500000959.01
5	110537074	110541583	TuG1812G0500000960.01
5	110688040	110690249	TuG1812G0500000961.01
5	110827273	110831782	TuG1812G0500000962.01
5	111016434	111016949	TuG1812G0500000963.01
5	111741708	111743235	TuG1812G0500000964.01
5	111744087	111754132	TuG1812G0500000965.01
5	111755312	111756129	TuG1812G0500000966.01
5	111756294	111761440	TuG1812G0500000967.01
5	111791622	111799432	TuG1812G0500000968.01
5	111799828	111800558	TuG1812G0500000969.01
5	112975106	112978933	TuG1812G0500000970.01
5	113111221	113112210	TuG1812U0000122200.01
5	113338186	113338472	TuG1812G0500000971.01
5	113412566	113413040	TuG1812G0500000972.01
5	113504760	113507980	TuG1812G0500000973.01
5	113556664	113558716	TuG1812G0500000974.01
5	114083077	114094128	TuG1812G0500000975.01
5	114095006	114101583	TuG1812G0500000976.01
5	114202021	114205122	TuG1812G0500000977.01
5	114208490	114209580	TuG1812G0500000978.01
5	114218537	114219574	TuG1812G0500000979.01
5	114611896	114613279	TuG1812G0500000980.01
5	114975675	114990361	TuG1812G0500000981.01
5	115084000	115087534	TuG1812G0500000982.01
5	115088687	115092817	TuG1812G0500000983.01
5	115877387	115877881	TuG1812G0500000984.01
5	116309072	116313876	TuG1812G0500000985.01
5	116729235	116740793	TuG1812G0500000986.01
5	116742477	116747286	TuG1812G0500000987.01
5	116747888	116748480	TuG1812G0500000989.01
5	116747963	116748480	TuG1812G0500000988.01
5	117109688	117111540	TuG1812G0500000990.01
5	117117882	117118696	TuG1812G0500000991.01
5	117140927	117143196	TuG1812G0500000992.01
5	117646361	117648237	TuG1812G0500000993.01
5	117976827	117984221	TuG1812G0500000994.01
5	118015682	118016025	TuG1812G0500000995.01
5	118055697	118060947	TuG1812G0500000996.01
5	118127585	118135420	TuG1812G0500000997.01
5	118769626	118773114	TuG1812G0500000998.01
5	118776269	118783985	TuG1812G0500000999.01
5	118980284	118983797	TuG1812G0500001000.01
5	119003694	119007330	TuG1812G0500001001.01
5	119290067	119291757	TuG1812G0500001002.01
5	119296073	119299249	TuG1812G0500001003.01
5	119299359	119302950	TuG1812G0500001004.01
5	119355627	119361522	TuG1812G0500001005.01
5	119502269	119503258	TuG1812G0500001006.01
5	119638655	119641103	TuG1812G0500001007.01
5	119657619	119660564	TuG1812G0500001008.01
5	120453956	120460287	TuG1812G0500001009.01
5	120618555	120623800	TuG1812G0500001010.01
5	120624087	120627329	TuG1812G0500001011.01
5	120627862	120629304	TuG1812G0500001012.01
5	120723021	120728051	TuG1812G0500001013.01
5	120736994	120740306	TuG1812G0500001014.01
5	120742392	120744513	TuG1812G0500001015.01
5	120949438	120949674	TuG1812G0500001016.01
5	120966334	120967174	TuG1812G0500001017.01
5	120970808	120973211	TuG1812G0500001018.01
5	121163220	121173547	TuG1812G0500001019.01
5	121173565	121180075	TuG1812G0500001020.01
5	121180604	121182220	TuG1812G0500001021.01
5	121396642	121400164	TuG1812G0500001022.01
5	121786716	121787261	TuG1812G0500001023.01
5	121788519	121788982	TuG1812G0500001024.01
5	121831425	121831928	TuG1812G0500001025.01
5	121832693	121833071	TuG1812G0500001026.01
5	121925089	121940579	TuG1812G0500001027.01
5	122583173	122591079	TuG1812G0500001028.01
5	122591117	122612647	TuG1812G0500001029.01
5	122919539	122925294	TuG1812G0500001030.01
5	123177825	123185615	TuG1812G0500001031.01
5	123741031	123745351	TuG1812G0500001032.01
5	124060807	124063919	TuG1812G0500001033.01
5	124255877	124256841	TuG1812U0000218400.01
5	124323845	124327814	TuG1812G0500001034.01
5	124480921	124481124	TuG1812G0500001035.01
5	125124093	125125410	TuG1812G0500001036.01
5	125142332	125142945	TuG1812G0500001037.01
5	125471311	125475412	TuG1812G0500001038.01
5	125647178	125651790	TuG1812G0500001039.01
5	126005349	126010127	TuG1812G0500001040.01
5	126426650	126427391	TuG1812G0500001041.01
5	126428027	126433492	TuG1812G0500001042.01
5	127139077	127146408	TuG1812G0500001043.01
5	127146690	127149936	TuG1812G0500001044.01
5	127186829	127188957	TuG1812G0500001045.01
5	127191703	127192221	TuG1812G0500001046.01
5	127496862	127509305	TuG1812G0500001047.01
5	127548613	127554581	TuG1812G0500001048.01
5	127592436	127594847	TuG1812G0500001049.01
5	127756695	127767573	TuG1812G0500001050.01
5	128066869	128068348	TuG1812G0500001051.01
5	128287419	128289182	TuG1812G0500001052.01
5	128290937	128301562	TuG1812G0500001053.01
5	128936632	128951558	TuG1812G0500001054.01
5	128983292	128986108	TuG1812G0500001055.01
5	128986813	128987726	TuG1812G0500001056.01
5	128988205	128994313	TuG1812G0500001057.01
5	128994540	128995326	TuG1812G0500001058.01
5	129019953	129024800	TuG1812G0500001059.01
5	129334340	129342323	TuG1812G0500001060.01
5	129425604	129429262	TuG1812G0500001061.01
5	129523043	129523870	TuG1812G0500001062.01
5	130686125	130689021	TuG1812G0500001063.01
5	130689038	130693974	TuG1812G0500001064.01
5	130695051	130699131	TuG1812G0500001065.01
5	130833884	130835373	TuG1812G0500001066.01
5	131047783	131059800	TuG1812G0500001067.01
5	131132621	131136336	TuG1812G0500001068.01
5	131137517	131143427	TuG1812G0500001069.01
5	131148952	131150220	TuG1812G0500001070.01
5	131151773	131159651	TuG1812G0500001071.01
5	131160899	131166199	TuG1812G0500001072.01
5	131166825	131171262	TuG1812G0500001073.01
5	131351288	131353475	TuG1812G0500001074.01
5	131582757	131590229	TuG1812G0500001075.01
5	131590324	131596382	TuG1812G0500001076.01
5	132471415	132472180	TuG1812G0500001077.01
5	132524274	132524727	TuG1812G0500001078.01
5	132636020	132640837	TuG1812G0500001079.01
5	132717958	132718640	TuG1812G0500001080.01
5	132742143	132742388	TuG1812G0500001081.01
5	132912949	132913602	TuG1812G0500001082.01
5	132916259	132920969	TuG1812G0500001083.01
5	132922338	132926926	TuG1812G0500001084.01
5	133104820	133106840	TuG1812G0500001085.01
5	133190939	133197622	TuG1812G0500001086.01
5	133197787	133200399	TuG1812G0500001087.01
5	133201538	133201782	TuG1812G0500001088.01
5	133202188	133204750	TuG1812G0500001089.01
5	133549934	133550554	TuG1812G0500001091.01
5	133549959	133550774	TuG1812G0500001090.01
5	134034701	134038157	TuG1812G0500001092.01
5	134097326	134104011	TuG1812G0500001093.01
5	134509299	134510999	TuG1812G0500001094.01
5	134975317	134977839	TuG1812G0500001095.01
5	135861312	135864959	TuG1812G0500001096.01
5	135867039	135875634	TuG1812G0500001097.01
5	135876500	135883631	TuG1812G0500001098.01
5	136005939	136006620	TuG1812G0500001099.01
5	136703755	136707607	TuG1812G0500001100.01
5	136746487	136756647	TuG1812G0500001101.01
5	136796438	136806590	TuG1812G0500001102.01
5	137731277	137734399	TuG1812G0500001103.01
5	137738670	137745384	TuG1812G0500001104.01
5	137869984	137873628	TuG1812G0500001105.01
5	138136455	138139763	TuG1812G0500001106.01
5	138539236	138540609	TuG1812G0500001107.01
5	140341760	140351160	TuG1812G0500001108.01
5	141038401	141040409	TuG1812G0500001109.01
5	141042365	141043837	TuG1812G0500001110.01
5	141110877	141131927	TuG1812G0500001111.01
5	141133294	141136469	TuG1812G0500001112.01
5	141478977	141480591	TuG1812G0500001113.01
5	141557407	141558406	TuG1812G0500001114.01
5	142599083	142602447	TuG1812G0500001115.01
5	142730557	142739650	TuG1812G0500001116.01
5	142835029	142838939	TuG1812G0500001117.01
5	142934024	142938817	TuG1812G0500001118.01
5	143045988	143049399	TuG1812G0500001119.01
5	144147303	144154244	TuG1812G0500001120.01
5	144616215	144626237	TuG1812G0500001121.01
5	145339398	145370209	TuG1812G0500001122.01
5	145370526	145372164	TuG1812G0500001123.01
5	145512789	145538753	TuG1812G0500001124.01
5	146404793	146405670	TuG1812G0500001125.01
5	146408195	146409099	TuG1812G0500001126.01
5	148009761	148013015	TuG1812G0500001127.01
5	149042451	149045936	TuG1812G0500001128.01
5	149763686	149767516	TuG1812G0500001129.01
5	149990975	149991281	TuG1812G0500001130.01
5	151324874	151341204	TuG1812G0500001131.01
5	151908293	151909869	TuG1812G0500001132.01
5	152136149	152137577	TuG1812G0500001133.01
5	152138740	152149688	TuG1812G0500001134.01
5	152445917	152461502	TuG1812G0500001135.01
5	152570640	152571668	TuG1812G0500001136.01
5	153235744	153236990	TuG1812G0500001138.01
5	153469847	153470848	TuG1812G0500001139.01
5	154789593	154804480	TuG1812G0500001141.01
5	154870471	154876846	TuG1812G0500001142.01
5	155287998	155288446	TuG1812G0500001143.01
5	155293528	155296320	TuG1812G0500001144.01
5	155802400	155811156	TuG1812G0500001145.01
5	155811084	155814591	TuG1812G0500001146.01
5	156225097	156230215	TuG1812G0500001147.01
5	156231884	156233144	TuG1812G0500001148.01
5	156235016	156238734	TuG1812G0500001149.01
5	156434078	156436484	TuG1812G0500001150.01
5	157295844	157300356	TuG1812G0500001151.01
5	157938464	157939023	TuG1812G0500001152.01
5	158183574	158183836	TuG1812G0500001153.01
5	158413681	158416942	TuG1812G0500001154.01
5	158417940	158418864	TuG1812G0500001155.01
5	158421482	158426798	TuG1812G0500001156.01
5	158426703	158430721	TuG1812G0500001157.01
5	158441693	158441960	TuG1812G0500001158.01
5	159217666	159219526	TuG1812G0500001159.01
5	159581855	159582333	TuG1812G0500001160.01
5	161189454	161190713	TuG1812G0500001161.01
5	161436470	161438410	TuG1812G0500001162.01
5	161475911	161478778	TuG1812G0500001163.01
5	162237635	162239498	TuG1812G0500001164.01
5	162472055	162483982	TuG1812G0500001165.01
5	162498400	162500733	TuG1812G0500001166.01
5	163009306	163020011	TuG1812G0500001167.01
5	163278276	163280330	TuG1812G0500001168.01
5	163823848	163830715	TuG1812G0500001169.01
5	163840836	163844685	TuG1812G0500001170.01
5	164516930	164519942	TuG1812G0500001171.01
5	165147403	165158153	TuG1812G0500001172.01
5	165366546	165372705	TuG1812G0500001173.01
5	165536412	165537825	TuG1812G0500001174.01
5	165542601	165560817	TuG1812G0500001175.01
5	166130528	166136543	TuG1812G0500001176.01
5	166885389	166887300	TuG1812G0500001177.01
5	166887315	166887878	TuG1812G0500001178.01
5	166962789	166964550	TuG1812G0500001179.01
5	167088218	167088544	TuG1812G0500001180.01
5	167556659	167562590	TuG1812G0500001181.01
5	167784406	167788181	TuG1812G0500001182.01
5	167790335	167792881	TuG1812G0500001183.01
5	167834115	167834793	TuG1812G0500001184.01
5	168301719	168302572	TuG1812G0500001185.01
5	169163595	169164742	TuG1812G0500001186.01
5	169627352	169628551	TuG1812G0500001187.01
5	169628909	169633160	TuG1812G0500001188.01
5	169963209	169964912	TuG1812G0500001189.01
5	170560315	170563474	TuG1812G0500001190.01
5	171012583	171019004	TuG1812G0500001191.01
5	171253343	171254273	TuG1812G0500001192.01
5	171785200	171785437	TuG1812G0200005403.01
5	172463584	172469546	TuG1812G0500001193.01
5	172862237	172862978	TuG1812G0500001194.01
5	173867647	173874147	TuG1812G0500001195.01
5	174361242	174364383	TuG1812G0500001196.01
5	174361545	174364305	TuG1812G0500001197.01
5	174379879	174381123	TuG1812G0500001198.01
5	174407107	174411219	TuG1812G0500001199.01
5	176087947	176089005	TuG1812G0500001200.01
5	176384431	176386175	TuG1812G0500001202.01
5	176384431	176386178	TuG1812G0500001203.01
5	176585213	176589571	TuG1812G0500001204.01
5	178167693	178170384	TuG1812G0500001205.01
5	178465285	178470180	TuG1812G0500001206.01
5	178472417	178474004	TuG1812G0500001207.01
5	178738750	178748745	TuG1812G0500001208.01
5	178863254	178863961	TuG1812G0500001209.01
5	179204410	179205253	TuG1812G0500001210.01
5	179696149	179696349	TuG1812G0500001211.01
5	180165884	180166654	TuG1812G0500001212.01
5	180167402	180179095	TuG1812G0500001213.01
5	180185912	180186737	TuG1812G0500001214.01
5	180186912	180191260	TuG1812G0500001215.01
5	180402652	180403296	TuG1812G0500001216.01
5	180810151	180816517	TuG1812G0500001217.01
5	180980745	180984981	TuG1812G0500001218.01
5	180985773	181002295	TuG1812G0500001219.01
5	181006228	181012298	TuG1812G0500001220.01
5	181138758	181140395	TuG1812G0500001221.01
5	181446484	181447623	TuG1812G0500001222.01
5	181605594	181613501	TuG1812G0500001223.01
5	181613858	181616887	TuG1812G0500001224.01
5	181867129	181867539	TuG1812G0500001225.01
5	182370567	182375591	TuG1812G0500001226.01
5	182829200	182834273	TuG1812G0500001227.01
5	183511267	183514715	TuG1812G0500001228.01
5	183520858	183525059	TuG1812G0500001229.01
5	183525182	183530593	TuG1812G0500001230.01
5	183533152	183537754	TuG1812G0500001231.01
5	183537250	183537818	TuG1812G0500001232.01
5	183793004	183796259	TuG1812G0500001233.01
5	184370397	184385555	TuG1812G0500001236.01
5	184418613	184420726	TuG1812G0500001237.01
5	185063228	185087617	TuG1812G0500001238.01
5	186313492	186321722	TuG1812G0500001239.01
5	186993134	186995185	TuG1812G0500001240.01
5	187011669	187014322	TuG1812G0500001241.01
5	187135402	187135652	TuG1812G0500001242.01
5	187180798	187181572	TuG1812G0500001243.01
5	187181988	187183472	TuG1812G0500001244.01
5	188111463	188124551	TuG1812G0500001245.01
5	188316670	188317527	TuG1812G0500001246.01
5	188733241	188741709	TuG1812G0500001247.01
5	188744737	188747977	TuG1812G0500001248.01
5	188748026	188748911	TuG1812G0500001249.01
5	189010997	189016618	TuG1812G0500001250.01
5	189314444	189320775	TuG1812G0500001251.01
5	189363889	189365523	TuG1812G0500001252.01
5	189364376	189365466	TuG1812G0500001253.01
5	189576174	189580348	TuG1812G0500001254.01
5	189787942	189790560	TuG1812G0500001255.01
5	189797958	189801379	TuG1812G0500001256.01
5	189969109	189973265	TuG1812G0500001257.01
5	190044035	190044553	TuG1812G0500001258.01
5	190050418	190054401	TuG1812G0500001259.01
5	190051172	190054501	TuG1812G0500001260.01
5	190064668	190068105	TuG1812G0500001262.01
5	190098395	190098892	TuG1812G0400000688.01
5	190181809	190185169	TuG1812G0500001263.01
5	190313208	190317069	TuG1812G0500001264.01
5	190578457	190581456	TuG1812G0500001265.01
5	191853822	191854466	TuG1812G0500001266.01
5	191856903	191863472	TuG1812G0500001267.01
5	191869198	191885326	TuG1812G0500001268.01
5	192439368	192444901	TuG1812G0500001269.01
5	192692040	192699695	TuG1812G0500001270.01
5	192701000	192710570	TuG1812G0500001271.01
5	193303413	193304641	TuG1812G0500001272.01
5	193575759	193577901	TuG1812G0500001273.01
5	193579246	193580159	TuG1812G0500001274.01
5	193585027	193585767	TuG1812G0500001275.01
5	193714719	193715222	TuG1812G0500001276.01
5	193970995	193972849	TuG1812G0500001277.01
5	195298247	195303488	TuG1812G0500001278.01
5	195500082	195504142	TuG1812G0500001279.01
5	195613396	195614760	TuG1812G0500001280.01
5	195714172	195714537	TuG1812G0500001281.01
5	195959870	195963274	TuG1812G0500001282.01
5	195963858	195964872	TuG1812G0500001283.01
5	195966271	195967149	TuG1812G0500001284.01
5	195969763	195971244	TuG1812G0500001285.01
5	196123129	196131893	TuG1812G0500001286.01
5	196270402	196272224	TuG1812G0500001287.01
5	196528116	196539131	TuG1812G0500001288.01
5	196562738	196566018	TuG1812G0500001289.01
5	198018485	198020824	TuG1812G0500001290.01
5	198113354	198114415	TuG1812G0500001291.01
5	198584075	198585602	TuG1812G0500001292.01
5	198613001	198614178	TuG1812G0500001293.01
5	198614714	198617631	TuG1812G0500001294.01
5	198618301	198618988	TuG1812G0500001295.01
5	198619617	198627064	TuG1812G0500001296.01
5	198700211	198700671	TuG1812G0500001297.01
5	198727069	198733509	TuG1812G0500001298.01
5	200037349	200043843	TuG1812G0500001300.01
5	200063485	200072150	TuG1812G0500001301.01
5	200163119	200166615	TuG1812G0500001302.01
5	200379243	200383651	TuG1812G0500001303.01
5	200406387	200407203	TuG1812G0500001304.01
5	200537848	200543885	TuG1812G0500001305.01
5	200752615	200756507	TuG1812G0500001306.01
5	200756564	200762628	TuG1812G0500001307.01
5	200786534	200786854	TuG1812G0500001308.01
5	201812274	201813673	TuG1812G0500001309.01
5	202207251	202214710	TuG1812G0500001310.01
5	202346675	202349588	TuG1812G0300001556.01
5	202569118	202571824	TuG1812G0500001311.01
5	202572470	202575433	TuG1812G0500001312.01
5	202576438	202576832	TuG1812G0500001313.01
5	202579615	202580423	TuG1812G0500001314.01
5	202988699	202990864	TuG1812G0500001315.01
5	203435883	203436520	TuG1812G0500001316.01
5	203449572	203452116	TuG1812G0500001317.01
5	203481501	203488946	TuG1812G0500001318.01
5	203489633	203493020	TuG1812G0500001319.01
5	203495476	203495880	TuG1812G0500001320.01
5	203586075	203588444	TuG1812G0500001321.01
5	203588908	203599838	TuG1812G0500001322.01
5	205650214	205658634	TuG1812G0500001323.01
5	205684856	205685284	TuG1812G0500001324.01
5	205785502	205785910	TuG1812G0500001325.01
5	207144818	207147922	TuG1812G0500001326.01
5	207148586	207158757	TuG1812G0500001327.01
5	207627776	207635599	TuG1812G0500001328.01
5	207663419	207664790	TuG1812G0500001329.01
5	207962222	207967484	TuG1812G0500001330.01
5	207970115	207987570	TuG1812G0500001331.01
5	208291785	208293766	TuG1812G0500001332.01
5	208489563	208496672	TuG1812G0500001333.01
5	209149302	209156394	TuG1812G0500001334.01
5	209412184	209413298	TuG1812G0500001335.01
5	210055353	210060193	TuG1812G0500001336.01
5	210621203	210623702	TuG1812G0500001337.01
5	210659031	210662328	TuG1812G0500001338.01
5	210924047	210926606	TuG1812G0500001339.01
5	211056868	211061537	TuG1812G0500001340.01
5	211512780	211514647	TuG1812G0500001341.01
5	211556831	211558679	TuG1812G0500001342.01
5	211639820	211642952	TuG1812G0500001343.01
5	211643489	211644120	TuG1812G0500001344.01
5	211745044	211745692	TuG1812G0500001345.01
5	211753290	211753803	TuG1812G0500001346.01
5	211754541	211764015	TuG1812G0500001347.01
5	212728826	212733603	TuG1812G0500001348.01
5	212743846	212745083	TuG1812G0500001349.01
5	212896280	212901177	TuG1812G0500001350.01
5	212901400	212907988	TuG1812G0500001351.01
5	212914814	212915323	TuG1812G0500001352.01
5	213387183	213387909	TuG1812G0500001353.01
5	213388651	213390775	TuG1812G0500001354.01
5	213999065	214004527	TuG1812G0500001355.01
5	214273116	214274065	TuG1812G0500001356.01
5	214662396	214665407	TuG1812G0500001357.01
5	214669192	214671159	TuG1812G0500001358.01
5	215433983	215435597	TuG1812G0500001359.01
5	215438899	215439297	TuG1812G0500001360.01
5	215452699	215456810	TuG1812G0500001361.01
5	215583928	215585086	TuG1812G0500001362.01
5	216259830	216260218	TuG1812G0500001363.01
5	216901605	216904427	TuG1812G0500001364.01
5	217466173	217470047	TuG1812G0500001365.01
5	217477571	217478333	TuG1812G0500001366.01
5	217887025	217890223	TuG1812G0500001367.01
5	218071414	218080047	TuG1812G0500001368.01
5	218420827	218424550	TuG1812G0500001369.01
5	218452248	218457742	TuG1812G0200003161.01
5	219280123	219282699	TuG1812G0500001370.01
5	219634801	219636007	TuG1812G0500001371.01
5	219641366	219642612	TuG1812G0500001372.01
5	220262992	220263211	TuG1812G0500001373.01
5	221556136	221557857	TuG1812G0500001374.01
5	221561436	221563012	TuG1812G0500001375.01
5	221896800	221898044	TuG1812G0500001376.01
5	221995121	221995978	TuG1812G0500001377.01
5	222548659	222554748	TuG1812G0500001378.01
5	222656797	222659858	TuG1812G0500001379.01
5	223225087	223228283	TuG1812G0500001380.01
5	223878392	223878969	TuG1812G0500001381.01
5	224076128	224078691	TuG1812G0500001382.01
5	224585411	224594231	TuG1812G0500001383.01
5	224594781	224599173	TuG1812G0500001384.01
5	224599997	224603912	TuG1812G0500001385.01
5	225067163	225083422	TuG1812G0500001386.01
5	225581327	225582373	TuG1812G0500001387.01
5	225605412	225608999	TuG1812G0500001388.01
5	225609719	225610893	TuG1812G0500001389.01
5	225704859	225714853	TuG1812G0500001390.01
5	225920054	225921066	TuG1812G0500001391.01
5	226035590	226044294	TuG1812G0500001392.01
5	226525269	226525960	TuG1812G0500001393.01
5	226643083	226645450	TuG1812G0500001394.01
5	226646758	226647712	TuG1812G0500001395.01
5	226681139	226682067	TuG1812G0500001396.01
5	226696118	226697397	TuG1812G0500001397.01
5	226792204	226793132	TuG1812G0500001398.01
5	227222502	227222877	TuG1812G0500001399.01
5	227587520	227598495	TuG1812G0500001400.01
5	227648488	227651609	TuG1812G0500001401.01
5	227667518	227669463	TuG1812G0500001402.01
5	227753633	227758127	TuG1812G0500001403.01
5	229741450	229747956	TuG1812G0500001404.01
5	229998824	229999218	TuG1812G0500001405.01
5	231763557	231770988	TuG1812G0500001406.01
5	231812941	231813453	TuG1812G0500001407.01
5	231813484	231813788	TuG1812G0500001408.01
5	232196791	232197246	TuG1812G0500001409.01
5	232636478	232636753	TuG1812G0500001410.01
5	232641878	232645792	TuG1812G0500001411.01
5	232646226	232648606	TuG1812G0500001412.01
5	233607632	233634145	TuG1812G0500001413.01
5	233921399	233947934	TuG1812G0500001414.01
5	234581648	234584539	TuG1812G0500001415.01
5	235330694	235334372	TuG1812G0500001416.01
5	235611613	235614395	TuG1812G0500001417.01
5	236424477	236425678	TuG1812G0500001418.01
5	237928260	237931830	TuG1812G0500001419.01
5	238139957	238142629	TuG1812G0500001420.01
5	238176471	238181418	TuG1812G0500001421.01
5	239170332	239198799	TuG1812G0500001422.01
5	239753350	239756299	TuG1812G0500001423.01
5	241037436	241040729	TuG1812G0500001424.01
5	242319277	242323018	TuG1812G0500001425.01
5	242623229	242626120	TuG1812G0500001426.01
5	243560868	243563488	TuG1812G0500001427.01
5	243645363	243648927	TuG1812G0500001428.01
5	243758913	243761762	TuG1812G0500001429.01
5	243809745	243811599	TuG1812G0500001430.01
5	243814571	243815315	TuG1812G0500001431.01
5	244078405	244079040	TuG1812G0500001432.01
5	244093258	244095174	TuG1812G0500001433.01
5	244363994	244367694	TuG1812G0500001434.01
5	244449826	244455207	TuG1812G0500001435.01
5	244764338	244769820	TuG1812G0500001436.01
5	244824315	244829779	TuG1812G0500001437.01
5	244988889	244993711	TuG1812G0500001438.01
5	245007196	245007576	TuG1812G0500001439.01
5	245400807	245414665	TuG1812G0500001440.01
5	245735265	245736140	TuG1812G0500001441.01
5	246572344	246579749	TuG1812G0500001442.01
5	247041463	247068613	TuG1812G0500001443.01
5	247306430	247306999	TuG1812G0500001444.01
5	248372413	248394470	TuG1812G0500001445.01
5	248465172	248466145	TuG1812G0500001446.01
5	248936051	248958109	TuG1812G0500001447.01
5	249114302	249123040	TuG1812G0500001448.01
5	249166860	249170348	TuG1812G0500001449.01
5	249275449	249278031	TuG1812G0500001450.01
5	249282649	249283671	TuG1812G0500001451.01
5	249308730	249313432	TuG1812G0500001452.01
5	249550248	249551488	TuG1812G0500001453.01
5	249651335	249655548	TuG1812G0500001454.01
5	249763882	249768729	TuG1812G0500001455.01
5	251523337	251523656	TuG1812G0500001456.01
5	251623521	251624188	TuG1812G0500001457.01
5	252202072	252202785	TuG1812G0500001458.01
5	252585209	252593107	TuG1812G0500001460.01
5	252590554	252595633	TuG1812G0500001459.01
5	253041442	253046280	TuG1812G0500001461.01
5	253539937	253540954	TuG1812G0500001462.01
5	253541761	253554341	TuG1812G0500001463.01
5	253698714	253699564	TuG1812G0500001464.01
5	253700245	253701299	TuG1812G0500001465.01
5	253702128	253713134	TuG1812G0500001466.01
5	254212666	254215588	TuG1812G0500001467.01
5	255128723	255129445	TuG1812G0500001468.01
5	255245958	255248165	TuG1812G0500001469.01
5	255258144	255262871	TuG1812G0500001470.01
5	256605828	256631729	TuG1812G0500001471.01
5	256831210	256839514	TuG1812G0500001472.01
5	257676737	257678888	TuG1812G0500001473.01
5	257874357	257875397	TuG1812G0500001474.01
5	258061013	258065870	TuG1812G0500001475.01
5	258068596	258069749	TuG1812G0500001476.01
5	258073699	258077156	TuG1812G0500001477.01
5	259327855	259331740	TuG1812G0500001478.01
5	259500460	259506971	TuG1812G0500001479.01
5	259974358	260003703	TuG1812G0500001480.01
5	260796935	260799654	TuG1812G0500001481.01
5	260799262	260800112	TuG1812G0500001482.01
5	260800287	260800642	TuG1812G0500001483.01
5	260802074	260804953	TuG1812G0500001484.01
5	260805670	260806497	TuG1812G0500001485.01
5	260807837	260809699	TuG1812G0500001486.01
5	260904210	260905007	TuG1812G0500001487.01
5	260966018	260972529	TuG1812G0500001488.01
5	260972192	260974539	TuG1812G0500001489.01
5	261103024	261103500	TuG1812G0500001490.01
5	261265201	261274176	TuG1812G0500001492.01
5	261273859	261275644	TuG1812G0500001491.01
5	262522149	262527426	TuG1812G0500001493.01
5	262903638	262906154	TuG1812G0500001494.01
5	262909515	262911585	TuG1812G0500001495.01
5	262934053	262940832	TuG1812G0500001496.01
5	263681731	263685803	TuG1812G0500001497.01
5	263707988	263709875	TuG1812G0500001498.01
5	263991682	263992123	TuG1812G0500001499.01
5	264002646	264003406	TuG1812G0500001500.01
5	264152257	264154332	TuG1812G0500001501.01
5	264162130	264171280	TuG1812G0500001502.01
5	264485522	264501943	TuG1812G0500001503.01
5	265061334	265065473	TuG1812G0500001504.01
5	265225091	265240195	TuG1812G0500001505.01
5	265252882	265255806	TuG1812G0500001506.01
5	265256107	265257221	TuG1812G0500001507.01
5	266425487	266444661	TuG1812G0500001508.01
5	267015302	267016111	TuG1812G0500001509.01
5	267016272	267017859	TuG1812G0500001510.01
5	267024908	267025145	TuG1812G0500001511.01
5	267025248	267028872	TuG1812G0500001512.01
5	268554926	268555335	TuG1812G0500001513.01
5	269543004	269560740	TuG1812G0500001514.01
5	269562769	269563632	TuG1812G0500001515.01
5	269594065	269594476	TuG1812G0500001516.01
5	269661621	269662735	TuG1812G0500001517.01
5	269663753	269667506	TuG1812G0500001518.01
5	270367139	270377429	TuG1812G0500001519.01
5	270378015	270380144	TuG1812G0500001520.01
5	273280601	273284064	TuG1812G0500001521.01
5	273670917	273675714	TuG1812G0500001522.01
5	274215137	274218547	TuG1812G0500001523.01
5	274364808	274369383	TuG1812G0500001524.01
5	274473758	274476583	TuG1812G0500001525.01
5	274723567	274725403	TuG1812G0500001526.01
5	274724009	274725403	TuG1812G0500001527.01
5	274895246	274897106	TuG1812G0500001528.01
5	275120577	275122908	TuG1812G0500001529.01
5	275121478	275122821	TuG1812G0700001215.01
5	275123014	275124166	TuG1812G0700001214.01
5	275123369	275124166	TuG1812G0500001530.01
5	275148783	275151445	TuG1812G0500001531.01
5	275174905	275177498	TuG1812G0500001532.01
5	275210398	275211667	TuG1812G0500001533.01
5	275213402	275214904	TuG1812G0500001534.01
5	275217519	275218735	TuG1812G0500001535.01
5	275253944	275257539	TuG1812G0500001536.01
5	275260986	275263822	TuG1812G0500001537.01
5	275389919	275393362	TuG1812G0500001538.01
5	275419075	275421971	TuG1812G0500001539.01
5	276608138	276624490	TuG1812G0500001540.01
5	277008752	277013486	TuG1812G0500001541.01
5	277130052	277130384	TuG1812G0500001542.01
5	277230981	277231606	TuG1812G0500001543.01
5	277250788	277252635	TuG1812G0500001544.01
5	277254383	277257725	TuG1812G0500001545.01
5	277597586	277598800	TuG1812G0500001546.01
5	277770619	277780075	TuG1812G0500001547.01
5	277813923	277818581	TuG1812G0500001548.01
5	277991815	277995462	TuG1812G0500001549.01
5	277995855	277998578	TuG1812G0500001550.01
5	278172267	278176098	TuG1812G0500001551.01
5	278577529	278577864	TuG1812G0500001552.01
5	278675368	278677915	TuG1812G0500001553.01
5	278686487	278687509	TuG1812G0500001554.01
5	278795035	278796415	TuG1812G0500001555.01
5	278823844	278824291	TuG1812G0500001556.01
5	278999571	279001593	TuG1812G0500001557.01
5	279019467	279019918	TuG1812G0500001558.01
5	279527143	279527813	TuG1812G0500001559.01
5	279531179	279543438	TuG1812G0500001560.01
5	279544045	279549411	TuG1812G0500001561.01
5	279903047	279903929	TuG1812G0500001562.01
5	280008139	280008812	TuG1812G0500001563.01
5	280060041	280060801	TuG1812G0500001564.01
5	280070099	280080892	TuG1812G0500001565.01
5	280783595	280786767	TuG1812G0500001566.01
5	280790370	280792207	TuG1812G0500001567.01
5	281515085	281515524	TuG1812G0500001568.01
5	281655867	281677203	TuG1812G0500001569.01
5	281985183	281987856	TuG1812G0500001570.01
5	282126453	282127591	TuG1812G0500001571.01
5	282131783	282135264	TuG1812G0500001572.01
5	282146932	282151529	TuG1812G0500001573.01
5	282557003	282557457	TuG1812G0500001574.01
5	282596498	282602213	TuG1812G0500001575.01
5	282631725	282634653	TuG1812G0500001576.01
5	282792856	282794050	TuG1812G0500001577.01
5	282882416	282886065	TuG1812G0500001578.01
5	283311288	283312752	TuG1812G0500001579.01
5	283314948	283315426	TuG1812G0500001580.01
5	283320786	283323071	TuG1812G0500001581.01
5	283334985	283335429	TuG1812G0500001582.01
5	283392701	283394280	TuG1812G0500001583.01
5	283532524	283532952	TuG1812G0500001584.01
5	283554921	283556888	TuG1812G0500001585.01
5	283557706	283558384	TuG1812G0500001586.01
5	283826063	283827412	TuG1812G0500001587.01
5	283888955	283907014	TuG1812G0500001588.01
5	283906883	283910509	TuG1812G0500001589.01
5	284151049	284164287	TuG1812G0500001590.01
5	284222160	284229802	TuG1812G0500001591.01
5	284229436	284230343	TuG1812G0500001592.01
5	284954452	284954766	TuG1812G0500001593.01
5	285138629	285144840	TuG1812G0500001594.01
5	285179332	285182715	TuG1812G0500001595.01
5	285435769	285439077	TuG1812G0500001597.01
5	285437567	285443469	TuG1812G0500001596.01
5	285609147	285613566	TuG1812G0500001599.01
5	285611892	285618885	TuG1812G0500001598.01
5	285842314	285844215	TuG1812G0500001600.01
5	285880494	285885497	TuG1812G0500001601.01
5	285890271	285894814	TuG1812G0500001602.01
5	286058701	286060261	TuG1812G0500001603.01
5	286353397	286356853	TuG1812G0500001604.01
5	286566635	286568159	TuG1812G0500001605.01
5	287023424	287025827	TuG1812G0500001606.01
5	287329613	287331851	TuG1812G0500001607.01
5	287336100	287336993	TuG1812G0500001608.01
5	287834692	287835282	TuG1812G0500001609.01
5	288304629	288304878	TuG1812G0500001610.01
5	288452627	288452951	TuG1812G0500001611.01
5	288453429	288455286	TuG1812G0500001612.01
5	289030690	289034840	TuG1812G0500001613.01
5	289218115	289222804	TuG1812G0500001614.01
5	289566108	289570669	TuG1812G0500001615.01
5	289823039	289823344	TuG1812G0500001616.01
5	289823429	289828490	TuG1812G0500001617.01
5	290786641	290792655	TuG1812G0500001618.01
5	291154949	291155601	TuG1812G0500001619.01
5	291469159	291470285	TuG1812G0500001620.01
5	291513187	291517097	TuG1812G0500001621.01
5	291721545	291722093	TuG1812G0500001622.01
5	292004743	292004958	TuG1812G0500001623.01
5	292006162	292012160	TuG1812G0500001624.01
5	292013951	292016676	TuG1812G0500001625.01
5	292050149	292055617	TuG1812G0500001626.01
5	292107227	292108048	TuG1812G0500001627.01
5	292576710	292581319	TuG1812G0500001628.01
5	292686443	292690503	TuG1812G0500001629.01
5	292710396	292710934	TuG1812G0500001630.01
5	292711185	292722274	TuG1812G0500001631.01
5	293182001	293187820	TuG1812G0500001632.01
5	293338494	293342645	TuG1812G0500001633.01
5	293345785	293349557	TuG1812G0500001634.01
5	293353264	293354354	TuG1812G0500001635.01
5	293355869	293358612	TuG1812G0500001636.01
5	294142620	294146049	TuG1812G0500001637.01
5	294256161	294260063	TuG1812G0500001638.01
5	294422172	294427694	TuG1812G0500001639.01
5	294432690	294434729	TuG1812G0500001640.01
5	294455582	294464722	TuG1812G0500001641.01
5	294950582	294954598	TuG1812G0500001642.01
5	294957465	294958807	TuG1812G0500001643.01
5	294960227	294965421	TuG1812G0500001644.01
5	294982287	294988802	TuG1812G0500001645.01
5	295195974	295199267	TuG1812G0500001646.01
5	295319779	295322255	TuG1812G0500001647.01
5	295322493	295325687	TuG1812G0500001648.01
5	295374210	295379482	TuG1812G0500001649.01
5	295431994	295432219	TuG1812G0500001650.01
5	295471308	295476995	TuG1812G0500001651.01
5	295610008	295614255	TuG1812G0500001652.01
5	295616833	295619235	TuG1812G0500001653.01
5	295620701	295621011	TuG1812G0500001654.01
5	295696622	295703418	TuG1812G0500001655.01
5	295704860	295709627	TuG1812G0500001656.01
5	295710129	295710384	TuG1812G0500001657.01
5	295710983	295713756	TuG1812G0500001658.01
5	295714867	295717034	TuG1812G0500001659.01
5	295822816	295825385	TuG1812G0500001660.01
5	295822821	295825387	TuG1812G0500001661.01
5	295825898	295829841	TuG1812G0500001662.01
5	296031518	296033020	TuG1812G0500001663.01
5	296127387	296128169	TuG1812G0500001664.01
5	296224246	296226645	TuG1812G0500001665.01
5	296354458	296357378	TuG1812G0500001666.01
5	296419314	296419752	TuG1812G0500001667.01
5	296420306	296421535	TuG1812G0500001668.01
5	296421871	296427969	TuG1812G0500001669.01
5	296428187	296428521	TuG1812G0500001670.01
5	296429287	296430145	TuG1812G0500001671.01
5	296431981	296432553	TuG1812G0500001672.01
5	296992086	296995316	TuG1812G0500001673.01
5	297077561	297081370	TuG1812G0500001674.01
5	297219593	297221692	TuG1812G0500001676.01
5	297221089	297237965	TuG1812G0500001675.01
5	297411454	297414448	TuG1812G0500001677.01
5	297461368	297462651	TuG1812G0500001678.01
5	297464495	297467138	TuG1812G0500001679.01
5	297468327	297468635	TuG1812G0500001680.01
5	297715241	297716805	TuG1812G0500001681.01
5	298199562	298206498	TuG1812G0200001421.01
5	298199562	298206577	TuG1812G0500001682.01
5	298412954	298415849	TuG1812G0500001683.01
5	298652213	298652488	TuG1812G0500001684.01
5	298848871	298855438	TuG1812G0500001685.01
5	298858605	298860924	TuG1812G0500001686.01
5	298858605	298860924	TuG1812U0000221600.01
5	298981607	298982677	TuG1812G0500001687.01
5	299204694	299205053	TuG1812G0500001688.01
5	299205948	299207121	TuG1812G0500001689.01
5	299207579	299218800	TuG1812G0500001690.01
5	299243095	299246466	TuG1812G0300002683.01
5	299243095	299246530	TuG1812G0500001691.01
5	299246750	299249059	TuG1812G0500001692.01
5	299552768	299553748	TuG1812G0500001693.01
5	300489786	300491991	TuG1812G0500001694.01
5	300502369	300504189	TuG1812G0500001695.01
5	300507530	300510650	TuG1812G0500001696.01
5	300676322	300676850	TuG1812G0500001697.01
5	300677540	300680193	TuG1812G0500001698.01
5	300681181	300685009	TuG1812G0500001699.01
5	300684301	300685995	TuG1812G0500001700.01
5	300831024	300837669	TuG1812G0500001701.01
5	301146255	301148143	TuG1812G0500001702.01
5	301551300	301555797	TuG1812G0500001703.01
5	301557088	301559668	TuG1812G0500001704.01
5	301665061	301668873	TuG1812G0500001705.01
5	301889466	301893373	TuG1812G0500001706.01
5	301893728	301900672	TuG1812G0500001707.01
5	301955637	301959792	TuG1812G0500001708.01
5	301960276	301964663	TuG1812G0500001709.01
5	301964798	301968497	TuG1812G0500001710.01
5	301978847	301981749	TuG1812G0500001711.01
5	301981755	301984714	TuG1812G0500001712.01
5	301996398	301997420	TuG1812G0500001713.01
5	302094755	302095517	TuG1812G0500001714.01
5	302098829	302103949	TuG1812G0500001715.01
5	302106860	302107423	TuG1812G0500001716.01
5	302108976	302113176	TuG1812G0500001717.01
5	302113227	302114388	TuG1812G0500001718.01
5	302114755	302120012	TuG1812G0500001719.01
5	302155094	302155354	TuG1812G0500001720.01
5	302533271	302538737	TuG1812G0500001721.01
5	302538869	302542011	TuG1812G0500001722.01
5	302923735	302926483	TuG1812G0500001723.01
5	303360371	303365829	TuG1812G0500001724.01
5	303366837	303370748	TuG1812G0500001725.01
5	303398851	303404154	TuG1812G0500001726.01
5	303432007	303432363	TuG1812G0500001727.01
5	303678255	303684425	TuG1812G0500001728.01
5	303972360	303974020	TuG1812G0500001729.01
5	304038387	304039956	TuG1812G0500001730.01
5	304051224	304052413	TuG1812G0500001732.01
5	304051265	304052136	TuG1812G0500001731.01
5	304054490	304056800	TuG1812G0500001733.01
5	304083611	304084706	TuG1812G0500001734.01
5	304424267	304427577	TuG1812G0500001735.01
5	304431374	304433256	TuG1812G0500001736.01
5	304911071	304913791	TuG1812G0500001737.01
5	304913753	304916007	TuG1812G0500001738.01
5	304916102	304918890	TuG1812G0500001739.01
5	304927078	304933073	TuG1812G0500001740.01
5	304946696	304950711	TuG1812G0500001741.01
5	305168280	305170455	TuG1812G0500001742.01
5	305170917	305171183	TuG1812G0500001743.01
5	305171247	305172184	TuG1812G0500001744.01
5	305385867	305386637	TuG1812G0500001745.01
5	305389638	305400057	TuG1812G0500001746.01
5	305759077	305759397	TuG1812G0500001747.01
5	305759544	305761042	TuG1812G0500001748.01
5	305877088	305880966	TuG1812G0500001749.01
5	305938485	305940641	TuG1812G0500001750.01
5	305938485	305940641	TuG1812U0000216700.01
5	306106883	306107559	TuG1812G0500001751.01
5	306132782	306134091	TuG1812G0500001752.01
5	306383833	306385699	TuG1812G0500001754.01
5	306383833	306385861	TuG1812G0500001753.01
5	306459773	306461314	TuG1812G0500001755.01
5	306744842	306746176	TuG1812G0500001756.01
5	306757222	306758230	TuG1812G0500001757.01
5	307734272	307738683	TuG1812G0500001758.01
5	307739525	307740843	TuG1812G0500001759.01
5	307809305	307810498	TuG1812G0500001760.01
5	307812223	307814844	TuG1812G0500001761.01
5	308067507	308070306	TuG1812G0500001762.01
5	308240116	308240442	TuG1812G0500001763.01
5	308415059	308415660	TuG1812G0500001764.01
5	308417987	308418867	TuG1812G0500001765.01
5	308429728	308430084	TuG1812G0500001766.01
5	308727730	308733492	TuG1812G0500001767.01
5	308736088	308742682	TuG1812G0500001768.01
5	309124329	309125052	TuG1812G0500001769.01
5	309447290	309447630	TuG1812G0500001770.01
5	309478451	309482660	TuG1812G0500001772.01
5	309481763	309483375	TuG1812G0500001771.01
5	309513256	309517017	TuG1812G0500001773.01
5	309521315	309523715	TuG1812G0500001774.01
5	309525445	309525690	TuG1812G0500001775.01
5	310125005	310125862	TuG1812G0500001776.01
5	310482869	310483144	TuG1812G0500001777.01
5	310490720	310492470	TuG1812G0500001778.01
5	310498548	310500227	TuG1812G0500001779.01
5	310504447	310508319	TuG1812G0500001780.01
5	311362519	311362912	TuG1812G0500001781.01
5	311535457	311538174	TuG1812G0500001782.01
5	311880435	311883556	TuG1812G0500001783.01
5	311906896	311908730	TuG1812G0500001784.01
5	312055920	312059561	TuG1812G0500001785.01
5	312559071	312559998	TuG1812G0500001786.01
5	312642775	312646651	TuG1812G0500001787.01
5	312646739	312649315	TuG1812G0500001788.01
5	313543457	313545428	TuG1812G0500001789.01
5	313801606	313805423	TuG1812G0500001790.01
5	314081273	314083846	TuG1812G0500001791.01
5	314084453	314089631	TuG1812G0500001792.01
5	314543126	314543991	TuG1812G0500001793.01
5	314552517	314554406	TuG1812G0500001794.01
5	314813762	314814449	TuG1812G0500001795.01
5	314932661	314938757	TuG1812G0500001796.01
5	315042374	315052791	TuG1812G0500001797.01
5	315212950	315216006	TuG1812G0500001798.01
5	315681049	315687732	TuG1812G0500001799.01
5	315864139	315866072	TuG1812G0500001800.01
5	316003016	316004951	TuG1812G0500001801.01
5	316008861	316011044	TuG1812G0500001802.01
5	316072802	316074986	TuG1812G0500001803.01
5	316078872	316080857	TuG1812G0500001804.01
5	316083346	316087430	TuG1812G0500001805.01
5	316091886	316095062	TuG1812G0500001806.01
5	316568039	316574490	TuG1812G0500001807.01
5	316578585	316586167	TuG1812G0500001808.01
5	316859755	316860809	TuG1812G0500001809.01
5	316935191	316938221	TuG1812G0500001810.01
5	316944239	316946872	TuG1812G0500001811.01
5	316950909	316959624	TuG1812G0500001812.01
5	317744014	317748272	TuG1812G0500001813.01
5	317840796	317847654	TuG1812G0500001814.01
5	318694611	318695391	TuG1812G0500001815.01
5	319097167	319099802	TuG1812G0500001816.01
5	319349676	319353546	TuG1812G0500001817.01
5	319545595	319549109	TuG1812G0500001818.01
5	319783576	319784294	TuG1812G0500001819.01
5	319786790	319798191	TuG1812G0500001820.01
5	319831881	319838113	TuG1812G0500001821.01
5	320037196	320039102	TuG1812G0500001822.01
5	320078987	320082594	TuG1812G0500001824.01
5	320082387	320086456	TuG1812G0500001823.01
5	320577410	320579581	TuG1812G0500001825.01
5	320642674	320651376	TuG1812G0500001826.01
5	321287329	321291695	TuG1812G0500001827.01
5	321375976	321378646	TuG1812G0500001828.01
5	321386247	321391833	TuG1812G0500001829.01
5	321685346	321700183	TuG1812G0500001830.01
5	321775982	321780113	TuG1812G0500001831.01
5	321795563	321801130	TuG1812G0500001832.01
5	321801908	321802806	TuG1812G0500001833.01
5	321837707	321843581	TuG1812G0500001834.01
5	322535977	322552409	TuG1812G0500001835.01
5	322578313	322578930	TuG1812G0500001836.01
5	322758368	322759259	TuG1812G0500001837.01
5	322760312	322760698	TuG1812G0500001838.01
5	322762505	322763219	TuG1812G0500001839.01
5	322772435	322776256	TuG1812G0500001840.01
5	322957487	322960016	TuG1812G0500001841.01
5	322960345	322963262	TuG1812G0500001842.01
5	322963295	322967888	TuG1812G0500001843.01
5	322969094	322990498	TuG1812G0500001844.01
5	323005314	323015268	TuG1812G0500001845.01
5	323109222	323138129	TuG1812G0500001846.01
5	323308427	323309247	TuG1812G0500001847.01
5	323311902	323327581	TuG1812G0500001848.01
5	323531295	323532706	TuG1812G0500001849.01
5	323588867	323593215	TuG1812G0500001850.01
5	323645813	323647268	TuG1812G0500001851.01
5	323848054	323852505	TuG1812G0500001852.01
5	324212258	324220117	TuG1812G0500001853.01
5	324220350	324222781	TuG1812G0500001854.01
5	324260298	324263780	TuG1812G0500001855.01
5	324388788	324391068	TuG1812G0500001856.01
5	324479802	324484302	TuG1812G0500001857.01
5	324724870	324734840	TuG1812G0500001858.01
5	324812120	324813173	TuG1812G0500001859.01
5	325313826	325317798	TuG1812G0500001860.01
5	326368079	326373543	TuG1812G0500001861.01
5	326375434	326376018	TuG1812G0500001862.01
5	326511637	326513228	TuG1812G0500001863.01
5	326634616	326634888	TuG1812G0500001864.01
5	326772408	326782204	TuG1812G0500001865.01
5	327463828	327467228	TuG1812G0500001866.01
5	327511471	327512370	TuG1812G0500001867.01
5	327525891	327527321	TuG1812G0500001868.01
5	327525900	327527309	TuG1812G0500001869.01
5	327531798	327543369	TuG1812G0500001870.01
5	327815874	327826522	TuG1812G0500001871.01
5	327827474	327847676	TuG1812G0500001872.01
5	327850997	327851756	TuG1812G0500001873.01
5	328047119	328050025	TuG1812G0500001874.01
5	328074828	328077937	TuG1812U0000295700.01
5	328074828	328077937	TuG1812G0500001875.01
5	328086872	328090404	TuG1812G0500001876.01
5	328106692	328107566	TuG1812G0500001877.01
5	328189610	328191206	TuG1812G0500001878.01
5	328191701	328195505	TuG1812G0500001879.01
5	328355283	328364570	TuG1812G0500001880.01
5	328468929	328470994	TuG1812G0500001881.01
5	328517828	328518232	TuG1812G0500001882.01
5	328859221	328861713	TuG1812G0500001883.01
5	329121009	329128897	TuG1812G0500001884.01
5	329131984	329135908	TuG1812G0500001885.01
5	329337275	329341976	TuG1812G0500001886.01
5	329516317	329524147	TuG1812G0500001887.01
5	329633983	329637082	TuG1812G0500001888.01
5	329637594	329638279	TuG1812G0500001889.01
5	329697730	329699680	TuG1812G0500001890.01
5	329820408	329823331	TuG1812G0500001891.01
5	330135712	330138895	TuG1812G0500001892.01
5	330211494	330229623	TuG1812G0500001893.01
5	330359584	330369739	TuG1812G0500001894.01
5	330370179	330373677	TuG1812G0500001895.01
5	331276459	331278462	TuG1812G0500001896.01
5	331278655	331282507	TuG1812G0500001897.01
5	331289339	331294143	TuG1812G0500001898.01
5	331297199	331300820	TuG1812G0500001899.01
5	331436427	331448193	TuG1812G0500001900.01
5	331600005	331601973	TuG1812G0500001901.01
5	332388593	332394781	TuG1812G0500001902.01
5	332388593	332395525	TuG1812G0500001903.01
5	332844003	332844450	TuG1812G0500001904.01
5	332869511	332878374	TuG1812G0500001905.01
5	333573033	333582077	TuG1812G0500001906.01
5	333949778	333956894	TuG1812G0500001907.01
5	333967212	333985234	TuG1812G0500001908.01
5	333988265	333998445	TuG1812G0500001909.01
5	333999811	334004620	TuG1812G0500001910.01
5	334194752	334195748	TuG1812G0500001911.01
5	334496373	334497515	TuG1812G0500001912.01
5	334624065	334629785	TuG1812G0500001914.01
5	334628834	334630553	TuG1812G0500001913.01
5	334631738	334632956	TuG1812G0500001915.01
5	335257117	335259826	TuG1812G0500001916.01
5	335479210	335481672	TuG1812G0500001917.01
5	335481918	335505414	TuG1812G0500001918.01
5	335689020	335690170	TuG1812G0500001919.01
5	336088077	336094503	TuG1812G0500001920.01
5	336109944	336112898	TuG1812G0500001921.01
5	336125091	336126245	TuG1812G0500001922.01
5	336497382	336499432	TuG1812G0500001923.01
5	336613050	336636546	TuG1812G0500001924.01
5	336717971	336722948	TuG1812G0500001925.01
5	336965227	336966765	TuG1812G0500001926.01
5	337070870	337071211	TuG1812G0500001927.01
5	337474781	337489490	TuG1812G0500001928.01
5	337495486	337505310	TuG1812G0500001929.01
5	337799390	337802691	TuG1812G0500001930.01
5	338254302	338262007	TuG1812G0500001931.01
5	338460909	338465595	TuG1812G0500001932.01
5	338487629	338494215	TuG1812G0500001933.01
5	338731031	338749819	TuG1812G0500001934.01
5	338898682	338901114	TuG1812G0500001935.01
5	339195429	339196053	TuG1812G0500001936.01
5	339199802	339204487	TuG1812G0500001937.01
5	339475899	339481972	TuG1812G0500001938.01
5	340187310	340188899	TuG1812G0500001939.01
5	340226138	340240993	TuG1812G0500001940.01
5	340436240	340440776	TuG1812G0500001941.01
5	340882446	340884209	TuG1812G0500001942.01
5	340884409	340886736	TuG1812G0500001943.01
5	341115183	341118404	TuG1812G0500001944.01
5	341255651	341261584	TuG1812G0500001945.01
5	341368847	341371113	TuG1812G0500001946.01
5	341501859	341504855	TuG1812G0500001947.01
5	341508210	341523778	TuG1812G0500001948.01
5	341697584	341699838	TuG1812G0500001949.01
5	341719245	341750698	TuG1812G0500001950.01
5	342023224	342023726	TuG1812G0500001951.01
5	342125452	342131074	TuG1812G0500001952.01
5	342139368	342141231	TuG1812G0500001953.01
5	342564100	342566829	TuG1812G0500001954.01
5	342864623	342866746	TuG1812G0500001955.01
5	343400553	343402904	TuG1812G0500001956.01
5	343441934	343455950	TuG1812G0500001957.01
5	343456398	343460235	TuG1812G0500001958.01
5	343595969	343598082	TuG1812G0500001959.01
5	343598684	343599705	TuG1812G0500001960.01
5	343915740	343924127	TuG1812G0500001961.01
5	344081590	344084614	TuG1812G0500001962.01
5	344081590	344085342	TuG1812G0500001963.01
5	344469201	344470058	TuG1812G0500001964.01
5	344703265	344713759	TuG1812G0500001965.01
5	345047122	345064021	TuG1812G0500001966.01
5	345449941	345452902	TuG1812G0500001967.01
5	345486521	345488024	TuG1812G0500001968.01
5	346221069	346223125	TuG1812G0500001969.01
5	346224448	346227280	TuG1812G0500001970.01
5	346331070	346341681	TuG1812G0500001971.01
5	346402696	346405948	TuG1812G0500001972.01
5	346995004	346997170	TuG1812G0500001973.01
5	347011763	347015097	TuG1812G0500001974.01
5	347016244	347019947	TuG1812G0500001975.01
5	347248430	347265863	TuG1812G0500001976.01
5	347268134	347270458	TuG1812G0500001977.01
5	347398644	347399864	TuG1812G0500001978.01
[truncated: 3,776 more rows]
