# Supplementary material for: Mapping of prehaustorial resistance against wheat leaf rust in einkorn (Triticum monococcum), a progenitor of wheat
Source: Front Plant Sci. 2023 Oct 23;14:1252123. doi: 10.3389/fpls.2023.1252123 (PMC10626456; doi:10.3389/fpls.2023.1252123)
Supplement: Supplementary file 5 [file Table_5.xlsx]

## Sheet: Table_S5
Table S5: BLAST-results of DArT-Seq markers that were genetically mapped to chromosome 5.
The sequences were aligned to the T.urartu genome (Ling et al., 2017 ) with standard BLAST-parameters.
Abbreviations and more detailed information are explored at the bottom of the table.
Query accession dot version	Subject accession dot version (database hit)	Percentage of identical matches	Alignment length	Number of mismatches	Number of gap openings	Start of alignment in query	End of alignment in query	Start of alignment in subject (database hit)	End of alignment in subject (database hit)	Expectation value (E-value)	Bit score	All subject Seq-id(s), separated by a ';'	Raw score	Number of identical matches	Number of positive-scoring matches	Total number of gaps	Percentage of positive-scoring matches	Query frame	Subject frame	Aligned part of query sequence	Aligned part of subject sequence	Query sequence length	Subject sequence length	All subject title(s), separated by a '<>'
(qaccver)	(saccver )	(pident )	(length )	(mismatch )	(gapopen )	(qstart )	(qend)	(sstart )	(send )	(evalue )	(bitscore )	(sallseqid )	(score )	(nident )	(positive )	(gaps )	(ppos )	(qframe )	(sframe )	(qseq )	(sseq )	(qlen )	(slen )	(salltitles )
SNP_100001826	ENA|MKGO01000002|MKGO01000002.1	97.778	45	1	0	1	45	728968834	728968790	4.21e-13	78.7	ENA|MKGO01000002|MKGO01000002.1	42	44	44	0	97.78	1	-1	TGCAGTACTTCACCGCGCAGTGCATCAGATAATATGTTGGGACCG	TGCAGTACTTCACCGCGCAGTGCATCAGATAAAATGTTGGGACCG	69	753719114	ENA|MKGO01000002|MKGO01000002.1 Triticum urartu cultivar G1812 chromosome 2, whole genome shotgun sequence.
SNP_100002151	ENA|MKGO01000001|MKGO01000001.1	98.551	69	1	0	1	69	26397462	26397530	1.92e-26	122	ENA|MKGO01000001|MKGO01000001.1	66	68	68	0	98.55	1	1	TGCAGAACACGGTGACTCGAAGCACCAGCAACCCATCATGTACATTGTCCCCGAGGAGCTTAAGAACTC	TGCAGAACACGGTGACTCGAAGCACCAGCAACCCATCATGTACATTGTCCCCGAGGAGCTTAAAAACTC	69	584211917	ENA|MKGO01000001|MKGO01000001.1 Triticum urartu cultivar G1812 chromosome 1, whole genome shotgun sequence.
SNP_1002973	ENA|MKGO01000002|MKGO01000002.1	100	69	0	0	1	69	139525533	139525601	4.12e-28	128	ENA|MKGO01000002|MKGO01000002.1	69	69	69	0	100	1	1	TGCAGAGAAAGGACTAACATTAGAATCTGGCGAACGATCTCACAGCCCTTTTGTGCACCATTAGAGTGC	TGCAGAGAAAGGACTAACATTAGAATCTGGCGAACGATCTCACAGCCCTTTTGTGCACCATTAGAGTGC	69	753719114	ENA|MKGO01000002|MKGO01000002.1 Triticum urartu cultivar G1812 chromosome 2, whole genome shotgun sequence.
SNP_1002973	ENA|MKGO01006989|MKGO01006989.1	98.551	69	0	1	1	69	6949	6882	6.9e-26	121	ENA|MKGO01006989|MKGO01006989.1	65	68	68	1	98.55	1	-1	TGCAGAGAAAGGACTAACATTAGAATCTGGCGAACGATCTCACAGCCCTTTTGTGCACCATTAGAGTGC	TGCAGAGAAAGGACTAACATTAGAATCTGGCGAACGATCTCACAGCCCTTT-GTGCACCATTAGAGTGC	69	10323	ENA|MKGO01006989|MKGO01006989.1 Triticum urartu cultivar G1812 TuUngrouped_contig_7283, whole genome shotgun sequence.
SNP_1002973	ENA|MKGO01000003|MKGO01000003.1	98.551	69	0	1	1	69	712473555	712473488	6.9e-26	121	ENA|MKGO01000003|MKGO01000003.1	65	68	68	1	98.55	1	-1	TGCAGAGAAAGGACTAACATTAGAATCTGGCGAACGATCTCACAGCCCTTTTGTGCACCATTAGAGTGC	TGCAGAGAAAGGACTAACATTAGAATCTGGCGAACGATCTCACAGCCCTTT-GTGCACCATTAGAGTGC	69	747046674	ENA|MKGO01000003|MKGO01000003.1 Triticum urartu cultivar G1812 chromosome 3, whole genome shotgun sequence.
SNP_1003237	ENA|MKGO01000002|MKGO01000002.1	100	54	0	0	1	54	30494678	30494625	8.98e-20	100	ENA|MKGO01000002|MKGO01000002.1	54	54	54	0	100	1	-1	TGCAGTCCGACATCGGCGGCGCCTCGCCTAGGTATCCACGCCTACGGACGGCCG	TGCAGTCCGACATCGGCGGCGCCTCGCCTAGGTATCCACGCCTACGGACGGCCG	69	753719114	ENA|MKGO01000002|MKGO01000002.1 Triticum urartu cultivar G1812 chromosome 2, whole genome shotgun sequence.
SNP_1003237	ENA|MKGO01000002|MKGO01000002.1	100	54	0	0	1	54	503820885	503820832	8.98e-20	100	ENA|MKGO01000002|MKGO01000002.1	54	54	54	0	100	1	-1	TGCAGTCCGACATCGGCGGCGCCTCGCCTAGGTATCCACGCCTACGGACGGCCG	TGCAGTCCGACATCGGCGGCGCCTCGCCTAGGTATCCACGCCTACGGACGGCCG	69	753719114	ENA|MKGO01000002|MKGO01000002.1 Triticum urartu cultivar G1812 chromosome 2, whole genome shotgun sequence.
SNP_1003237	ENA|MKGO01000003|MKGO01000003.1	94.34	53	1	1	1	53	582929458	582929408	1.17e-13	80.5	ENA|MKGO01000003|MKGO01000003.1	43	50	50	2	94.34	1	-1	TGCAGTCCGACATCGGCGGCGCCTCGCCTAGGTATCCACGCCTACGGACGGCC	TGCAGTCCGACATCGGCGGCGCCTCGCCTAGGTATCCACGCC--CGGCCGGCC	69	747046674	ENA|MKGO01000003|MKGO01000003.1 Triticum urartu cultivar G1812 chromosome 3, whole genome shotgun sequence.
SNP_1003237	ENA|MKGO01000001|MKGO01000001.1	92.453	53	2	2	1	53	270719238	270719288	5.45e-12	75	ENA|MKGO01000001|MKGO01000001.1	40	49	49	2	92.45	1	1	TGCAGTCCGACATCGGCGGCGCCTCGCCTAGGTATCCACGCCTACGGACGGCC	TGCAGTCCGACATCGGCGGCGCCTCGCCTAGGTATCCATGCC-A-GGCCGGCC	69	584211917	ENA|MKGO01000001|MKGO01000001.1 Triticum urartu cultivar G1812 chromosome 1, whole genome shotgun sequence.
SNP_1003845	ENA|MKGO01000002|MKGO01000002.1	100	69	0	0	1	69	668934303	668934371	4.12e-28	128	ENA|MKGO01000002|MKGO01000002.1	69	69	69	0	100	1	1	TGCAGGGTCACCGACGCCGAGTCCAAGACGCTAACAAGAGTGGGTGATGCCATGGACGGCAACCACATG	TGCAGGGTCACCGACGCCGAGTCCAAGACGCTAACAAGAGTGGGTGATGCCATGGACGGCAACCACATG	69	753719114	ENA|MKGO01000002|MKGO01000002.1 Triticum urartu cultivar G1812 chromosome 2, whole genome shotgun sequence.
SNP_1005201	ENA|MKGO01000001|MKGO01000001.1	100	69	0	0	1	69	56969305	56969373	4.12e-28	128	ENA|MKGO01000001|MKGO01000001.1	69	69	69	0	100	1	1	TGCAGAGACAAAGATTTGGGAATCACTCTGTGGTGGCTCGCCGTCAATGATCTAGGATGAGGGTGGGCA	TGCAGAGACAAAGATTTGGGAATCACTCTGTGGTGGCTCGCCGTCAATGATCTAGGATGAGGGTGGGCA	69	584211917	ENA|MKGO01000001|MKGO01000001.1 Triticum urartu cultivar G1812 chromosome 1, whole genome shotgun sequence.
SNP_1005205	ENA|MKGO01000006|MKGO01000006.1	100	52	0	0	1	52	62667716	62667665	1.16e-18	97.1	ENA|MKGO01000006|MKGO01000006.1	52	52	52	0	100	1	-1	TGCAGAGAAATTTCCACAGGTTTGCGTTGCGCGAGAGGAATTCAGGGAGCCG	TGCAGAGAAATTTCCACAGGTTTGCGTTGCGCGAGAGGAATTCAGGGAGCCG	69	575865107	ENA|MKGO01000006|MKGO01000006.1 Triticum urartu cultivar G1812 chromosome 6, whole genome shotgun sequence.
SNP_1006353	ENA|MKGO01000003|MKGO01000003.1	100	69	0	0	1	69	3825871	3825939	4.12e-28	128	ENA|MKGO01000003|MKGO01000003.1	69	69	69	0	100	1	1	TGCAGCCCAAACAGAGGAGGATGGAGGTGGTGGCATGGGGGCCAGCGTCAGAGACAGGTCTAAAGAAGA	TGCAGCCCAAACAGAGGAGGATGGAGGTGGTGGCATGGGGGCCAGCGTCAGAGACAGGTCTAAAGAAGA	69	747046674	ENA|MKGO01000003|MKGO01000003.1 Triticum urartu cultivar G1812 chromosome 3, whole genome shotgun sequence.
SNP_1006817	ENA|MKGO01000007|MKGO01000007.1	100	69	0	0	1	69	28685780	28685712	4.12e-28	128	ENA|MKGO01000007|MKGO01000007.1	69	69	69	0	100	1	-1	TGCAGGTGGAGGGATTCTACCAGGAAGAGCGGTTCGGCCGTGCCGCCTTGCCGCTGTCGTTCCAGGGCG	TGCAGGTGGAGGGATTCTACCAGGAAGAGCGGTTCGGCCGTGCCGCCTTGCCGCTGTCGTTCCAGGGCG	69	719689837	ENA|MKGO01000007|MKGO01000007.1 Triticum urartu cultivar G1812 chromosome 7, whole genome shotgun sequence.
SNP_1008044	ENA|MKGO01000006|MKGO01000006.1	100	47	0	0	19	65	574928882	574928836	6.99e-16	87.9	ENA|MKGO01000006|MKGO01000006.1	47	47	47	0	100	1	-1	ACTTGTTTTTTCTTCATCTATCTATGTATTGATCTCGTCCAGGTCCG	ACTTGTTTTTTCTTCATCTATCTATGTATTGATCTCGTCCAGGTCCG	69	575865107	ENA|MKGO01000006|MKGO01000006.1 Triticum urartu cultivar G1812 chromosome 6, whole genome shotgun sequence.
SNP_1008117	ENA|MKGO01000002|MKGO01000002.1	98.551	69	1	0	1	69	664661988	664662056	1.92e-26	122	ENA|MKGO01000002|MKGO01000002.1	66	68	68	0	98.55	1	1	TGCAGGTCGGCCAGCGCCTTGGGGGAGAGGTTGAAGTGCGTGGACTCGGCGGGCTCGGGGCCGCACCAC	TGCAGGTCGGCCAGCGCCTTGGGGGAGAGGTTGAAGTGCGTGGACTCGGCGGGCTCGGTGCCGCACCAC	69	753719114	ENA|MKGO01000002|MKGO01000002.1 Triticum urartu cultivar G1812 chromosome 2, whole genome shotgun sequence.
SNP_1008839	ENA|MKGO01000002|MKGO01000002.1	98.551	69	1	0	1	69	512436973	512437041	1.92e-26	122	ENA|MKGO01000002|MKGO01000002.1	66	68	68	0	98.55	1	1	TGCAGGATTAAAACTTGAATGTGTGCTAACTGAACTTACTGTTTGTGCAGCATGCTCGTCCTGCGTCAA	TGCAGGATTAAAACTTGAATGTGTGCTAACTGAATTTACTGTTTGTGCAGCATGCTCGTCCTGCGTCAA	69	753719114	ENA|MKGO01000002|MKGO01000002.1 Triticum urartu cultivar G1812 chromosome 2, whole genome shotgun sequence.
SNP_1008839	ENA|MKGO01000002|MKGO01000002.1	98	50	1	0	20	69	513329718	513329767	6.99e-16	87.9	ENA|MKGO01000002|MKGO01000002.1	47	49	49	0	98	1	1	TGTGTGCTAACTGAACTTACTGTTTGTGCAGCATGCTCGTCCTGCGTCAA	TGTGTGCTAACTGAACCTACTGTTTGTGCAGCATGCTCGTCCTGCGTCAA	69	753719114	ENA|MKGO01000002|MKGO01000002.1 Triticum urartu cultivar G1812 chromosome 2, whole genome shotgun sequence.
SNP_1010172	ENA|MKGO01000003|MKGO01000003.1	100	51	0	0	1	51	191680133	191680183	4.18e-18	95.3	ENA|MKGO01000003|MKGO01000003.1	51	51	51	0	100	1	1	TGCAGATTAGAAGCAGCAGTGGCAGCGTACATCACGGCAACGCGGTGGCCG	TGCAGATTAGAAGCAGCAGTGGCAGCGTACATCACGGCAACGCGGTGGCCG	69	747046674	ENA|MKGO01000003|MKGO01000003.1 Triticum urartu cultivar G1812 chromosome 3, whole genome shotgun sequence.
SNP_1010172	ENA|MKGO01000005|MKGO01000005.1	92.188	64	2	2	1	64	555869503	555869563	6.99e-16	87.9	ENA|MKGO01000005|MKGO01000005.1	47	59	59	3	92.19	1	1	TGCAGATTAGAAGCAGCAGTGGCAGCGTACATCACGGCAACGCGGTGGCCGAGATCGGAAGAGC	TGCAGATTAGAAGCAGCAGTGGCAGCGTACATCACAGCAACGCGGTGGCC-AG--CGGCAGAGC	69	661480603	ENA|MKGO01000005|MKGO01000005.1 Triticum urartu cultivar G1812 chromosome 5, whole genome shotgun sequence.
SNP_1010172	ENA|MKGO01000001|MKGO01000001.1	93.617	47	3	0	1	47	422040422	422040468	7.04e-11	71.3	ENA|MKGO01000001|MKGO01000001.1	38	44	44	0	93.62	1	1	TGCAGATTAGAAGCAGCAGTGGCAGCGTACATCACGGCAACGCGGTG	TGCAGATTAGAAGCAGCAGTGGCAGCGTACATCAGAGCAACACGGTG	69	584211917	ENA|MKGO01000001|MKGO01000001.1 Triticum urartu cultivar G1812 chromosome 1, whole genome shotgun sequence.
SNP_1011001	ENA|MKGO01000001|MKGO01000001.1	100	69	0	0	1	69	574315630	574315698	4.12e-28	128	ENA|MKGO01000001|MKGO01000001.1	69	69	69	0	100	1	1	TGCAGCTTGCTCCACATATGGTGTCTATTCTCAGTTCTTGGTTCTCCATAAACGCAAGTCAGCCGCCAC	TGCAGCTTGCTCCACATATGGTGTCTATTCTCAGTTCTTGGTTCTCCATAAACGCAAGTCAGCCGCCAC	69	584211917	ENA|MKGO01000001|MKGO01000001.1 Triticum urartu cultivar G1812 chromosome 1, whole genome shotgun sequence.
SNP_1011001	ENA|MKGO01000005|MKGO01000005.1	98.551	69	1	0	1	69	7246114	7246182	1.92e-26	122	ENA|MKGO01000005|MKGO01000005.1	66	68	68	0	98.55	1	1	TGCAGCTTGCTCCACATATGGTGTCTATTCTCAGTTCTTGGTTCTCCATAAACGCAAGTCAGCCGCCAC	TGCAGCTTGCTCCACATATGGTGTCTATTCTCAGTTTTTGGTTCTCCATAAACGCAAGTCAGCCGCCAC	69	661480603	ENA|MKGO01000005|MKGO01000005.1 Triticum urartu cultivar G1812 chromosome 5, whole genome shotgun sequence.
SNP_1012062	ENA|MKGO01000003|MKGO01000003.1	100	43	0	0	27	69	5171613	5171571	1.17e-13	80.5	ENA|MKGO01000003|MKGO01000003.1	43	43	43	0	100	1	-1	GGCGGCGGCGGCGGCATGCCGTACCCTGGCGTGGTGCTGAGTG	GGCGGCGGCGGCGGCATGCCGTACCCTGGCGTGGTGCTGAGTG	69	747046674	ENA|MKGO01000003|MKGO01000003.1 Triticum urartu cultivar G1812 chromosome 3, whole genome shotgun sequence.
SNP_1012783	ENA|MKGO01000002|MKGO01000002.1	100	66	0	0	1	66	39957241	39957306	1.92e-26	122	ENA|MKGO01000002|MKGO01000002.1	66	66	66	0	100	1	1	TGCAGCAACTCTGAATGTGTATGGCAGCAATCAAAACCACTGATGCACAAGAACGCCGCTCTCCCG	TGCAGCAACTCTGAATGTGTATGGCAGCAATCAAAACCACTGATGCACAAGAACGCCGCTCTCCCG	69	753719114	ENA|MKGO01000002|MKGO01000002.1 Triticum urartu cultivar G1812 chromosome 2, whole genome shotgun sequence.
SNP_1014880	ENA|MKGO01000005|MKGO01000005.1	100	69	0	0	1	69	449048363	449048295	4.12e-28	128	ENA|MKGO01000005|MKGO01000005.1	69	69	69	0	100	1	-1	TGCAGATCGCCTCCGAGGCGCGCCTCTCCGTGAAGCAGCTCTGCAAGGCGCTGATCCAGCAGGTGGAGG	TGCAGATCGCCTCCGAGGCGCGCCTCTCCGTGAAGCAGCTCTGCAAGGCGCTGATCCAGCAGGTGGAGG	69	661480603	ENA|MKGO01000005|MKGO01000005.1 Triticum urartu cultivar G1812 chromosome 5, whole genome shotgun sequence.
SNP_1016387	ENA|MKGO01000003|MKGO01000003.1	100	69	0	0	1	69	737289894	737289826	4.12e-28	128	ENA|MKGO01000003|MKGO01000003.1	69	69	69	0	100	1	-1	TGCAGTGGAGCAAGGCGTGGCATTTGGCACGCCTTTCCTTTCTAGTGCGTTTGCTTTCAGGGGTGTATC	TGCAGTGGAGCAAGGCGTGGCATTTGGCACGCCTTTCCTTTCTAGTGCGTTTGCTTTCAGGGGTGTATC	69	747046674	ENA|MKGO01000003|MKGO01000003.1 Triticum urartu cultivar G1812 chromosome 3, whole genome shotgun sequence.
SNP_1016810	ENA|MKGO01000004|MKGO01000004.1	100	69	0	0	1	69	549411311	549411243	4.12e-28	128	ENA|MKGO01000004|MKGO01000004.1	69	69	69	0	100	1	-1	TGCAGGAGTAGTTAGCGGAGCAACCACCGCGATAATTAGCCAGAGACGAGAGGCGACGTAGTACGTCGT	TGCAGGAGTAGTTAGCGGAGCAACCACCGCGATAATTAGCCAGAGACGAGAGGCGACGTAGTACGTCGT	69	619584425	ENA|MKGO01000004|MKGO01000004.1 Triticum urartu cultivar G1812 chromosome 4, whole genome shotgun sequence.
SNP_1017649	ENA|MKGO01000007|MKGO01000007.1	100	69	0	0	1	69	53605345	53605277	4.12e-28	128	ENA|MKGO01000007|MKGO01000007.1	69	69	69	0	100	1	-1	TGCAGGCAGGCTTCCCCGTGTTCGGATGCGACAGACACGCCCTTGTACAGCCTAGCGTGCCCAGCAGGC	TGCAGGCAGGCTTCCCCGTGTTCGGATGCGACAGACACGCCCTTGTACAGCCTAGCGTGCCCAGCAGGC	69	719689837	ENA|MKGO01000007|MKGO01000007.1 Triticum urartu cultivar G1812 chromosome 7, whole genome shotgun sequence.
SNP_1017735	ENA|MKGO01000001|MKGO01000001.1	100	69	0	0	1	69	37311595	37311527	4.12e-28	128	ENA|MKGO01000001|MKGO01000001.1	69	69	69	0	100	1	-1	TGCAGCCTACATATGGCTCCTCGTAATAATATGATTTGAGCCTCTAGGGTTGATGGCTGCATCGCAAGT	TGCAGCCTACATATGGCTCCTCGTAATAATATGATTTGAGCCTCTAGGGTTGATGGCTGCATCGCAAGT	69	584211917	ENA|MKGO01000001|MKGO01000001.1 Triticum urartu cultivar G1812 chromosome 1, whole genome shotgun sequence.
SNP_1017788	ENA|MKGO01000339|MKGO01000339.1	100	69	0	0	1	69	44677	44745	4.12e-28	128	ENA|MKGO01000339|MKGO01000339.1	69	69	69	0	100	1	1	TGCAGTCGGCTGTTTGGAAAGAGAGCTCATCCTTGGCAAGGTCGTAGAGCAGGTGGATGTTCTGCAACT	TGCAGTCGGCTGTTTGGAAAGAGAGCTCATCCTTGGCAAGGTCGTAGAGCAGGTGGATGTTCTGCAACT	69	117838	ENA|MKGO01000339|MKGO01000339.1 Triticum urartu cultivar G1812 TuUngrouped_contig_416, whole genome shotgun sequence.
SNP_1017788	ENA|MKGO01000339|MKGO01000339.1	95.652	69	3	0	1	69	57327	57395	4.15e-23	111	ENA|MKGO01000339|MKGO01000339.1	60	66	66	0	95.65	1	1	TGCAGTCGGCTGTTTGGAAAGAGAGCTCATCCTTGGCAAGGTCGTAGAGCAGGTGGATGTTCTGCAACT	TGCAGTCGGCTGTTTGGAAAGAGAGCTCATCCTTGGCAAGGTCGTAGAGTAGGTGGATATTCTGTAACT	69	117838	ENA|MKGO01000339|MKGO01000339.1 Triticum urartu cultivar G1812 TuUngrouped_contig_416, whole genome shotgun sequence.
SNP_1017788	ENA|MKGO01000003|MKGO01000003.1	100	69	0	0	1	69	746606388	746606456	4.12e-28	128	ENA|MKGO01000003|MKGO01000003.1	69	69	69	0	100	1	1	TGCAGTCGGCTGTTTGGAAAGAGAGCTCATCCTTGGCAAGGTCGTAGAGCAGGTGGATGTTCTGCAACT	TGCAGTCGGCTGTTTGGAAAGAGAGCTCATCCTTGGCAAGGTCGTAGAGCAGGTGGATGTTCTGCAACT	69	747046674	ENA|MKGO01000003|MKGO01000003.1 Triticum urartu cultivar G1812 chromosome 3, whole genome shotgun sequence.
SNP_1017788	ENA|MKGO01000003|MKGO01000003.1	98.507	67	1	0	1	67	743260777	743260711	2.48e-25	119	ENA|MKGO01000003|MKGO01000003.1	64	66	66	0	98.51	1	-1	TGCAGTCGGCTGTTTGGAAAGAGAGCTCATCCTTGGCAAGGTCGTAGAGCAGGTGGATGTTCTGCAA	TGCAGTCCGCTGTTTGGAAAGAGAGCTCATCCTTGGCAAGGTCGTAGAGCAGGTGGATGTTCTGCAA	69	747046674	ENA|MKGO01000003|MKGO01000003.1 Triticum urartu cultivar G1812 chromosome 3, whole genome shotgun sequence.
SNP_1017788	ENA|MKGO01000003|MKGO01000003.1	98.507	67	1	0	1	67	744788517	744788583	2.48e-25	119	ENA|MKGO01000003|MKGO01000003.1	64	66	66	0	98.51	1	1	TGCAGTCGGCTGTTTGGAAAGAGAGCTCATCCTTGGCAAGGTCGTAGAGCAGGTGGATGTTCTGCAA	TGCAGTCCGCTGTTTGGAAAGAGAGCTCATCCTTGGCAAGGTCGTAGAGCAGGTGGATGTTCTGCAA	69	747046674	ENA|MKGO01000003|MKGO01000003.1 Triticum urartu cultivar G1812 chromosome 3, whole genome shotgun sequence.
SNP_1017788	ENA|MKGO01000003|MKGO01000003.1	97.015	67	2	0	1	67	743008425	743008491	1.15e-23	113	ENA|MKGO01000003|MKGO01000003.1	61	65	65	0	97.01	1	1	TGCAGTCGGCTGTTTGGAAAGAGAGCTCATCCTTGGCAAGGTCGTAGAGCAGGTGGATGTTCTGCAA	TGCAGTCCGCTGTTTGGAAAGAGAGCTCATCCTTGGCAAGGTTGTAGAGCAGGTGGATGTTCTGCAA	69	747046674	ENA|MKGO01000003|MKGO01000003.1 Triticum urartu cultivar G1812 chromosome 3, whole genome shotgun sequence.
SNP_1017788	ENA|MKGO01000003|MKGO01000003.1	97.015	67	2	0	1	67	743162124	743162190	1.15e-23	113	ENA|MKGO01000003|MKGO01000003.1	61	65	65	0	97.01	1	1	TGCAGTCGGCTGTTTGGAAAGAGAGCTCATCCTTGGCAAGGTCGTAGAGCAGGTGGATGTTCTGCAA	TGCAGTCCGCTGTTTGGAAAGAGAGCTCATCCTTGGCAAGGTTGTAGAGCAGGTGGATGTTCTGCAA	69	747046674	ENA|MKGO01000003|MKGO01000003.1 Triticum urartu cultivar G1812 chromosome 3, whole genome shotgun sequence.
SNP_1017788	ENA|MKGO01000003|MKGO01000003.1	95.652	69	3	0	1	69	744356079	744356011	4.15e-23	111	ENA|MKGO01000003|MKGO01000003.1	60	66	66	0	95.65	1	-1	TGCAGTCGGCTGTTTGGAAAGAGAGCTCATCCTTGGCAAGGTCGTAGAGCAGGTGGATGTTCTGCAACT	TGCAGTCGGCTGTTTGGAAAGAGAGCTCATCCTTGGCAAGGTCGTAGAGAAGATGGATGTTTTGCAACT	69	747046674	ENA|MKGO01000003|MKGO01000003.1 Triticum urartu cultivar G1812 chromosome 3, whole genome shotgun sequence.
SNP_1017788	ENA|MKGO01000003|MKGO01000003.1	95.652	69	3	0	1	69	746619038	746619106	4.15e-23	111	ENA|MKGO01000003|MKGO01000003.1	60	66	66	0	95.65	1	1	TGCAGTCGGCTGTTTGGAAAGAGAGCTCATCCTTGGCAAGGTCGTAGAGCAGGTGGATGTTCTGCAACT	TGCAGTCGGCTGTTTGGAAAGAGAGCTCATCCTTGGCAAGGTCGTAGAGTAGGTGGATATTCTGTAACT	69	747046674	ENA|MKGO01000003|MKGO01000003.1 Triticum urartu cultivar G1812 chromosome 3, whole genome shotgun sequence.
SNP_1017788	ENA|MKGO01001422|MKGO01001422.1	95.652	69	3	0	1	69	1853	1921	4.15e-23	111	ENA|MKGO01001422|MKGO01001422.1	60	66	66	0	95.65	1	1	TGCAGTCGGCTGTTTGGAAAGAGAGCTCATCCTTGGCAAGGTCGTAGAGCAGGTGGATGTTCTGCAACT	TGCAGTCGGCTGTTTGGAAAGAGAGCTCATCCTTGGCAAGGTCGTAGAGTAGGTGGATATTCTGTAACT	69	49961	ENA|MKGO01001422|MKGO01001422.1 Triticum urartu cultivar G1812 TuUngrouped_contig_1610, whole genome shotgun sequence.
SNP_1018655	ENA|MKGO01003102|MKGO01003102.1	100	58	0	0	1	58	56917	56974	5.37e-22	108	ENA|MKGO01003102|MKGO01003102.1	58	58	58	0	100	1	1	TGCAGCTCCGCCGCCTGCGCGCAGCTCAGCCAGAGCCATGAGGGGAACGGCTGCTCCG	TGCAGCTCCGCCGCCTGCGCGCAGCTCAGCCAGAGCCATGAGGGGAACGGCTGCTCCG	69	72104	ENA|MKGO01003102|MKGO01003102.1 Triticum urartu cultivar G1812 TuUngrouped_contig_3354, whole genome shotgun sequence.
SNP_1018655	ENA|MKGO01000007|MKGO01000007.1	100	58	0	0	1	58	661379962	661380019	5.37e-22	108	ENA|MKGO01000007|MKGO01000007.1	58	58	58	0	100	1	1	TGCAGCTCCGCCGCCTGCGCGCAGCTCAGCCAGAGCCATGAGGGGAACGGCTGCTCCG	TGCAGCTCCGCCGCCTGCGCGCAGCTCAGCCAGAGCCATGAGGGGAACGGCTGCTCCG	69	719689837	ENA|MKGO01000007|MKGO01000007.1 Triticum urartu cultivar G1812 chromosome 7, whole genome shotgun sequence.
SNP_1018677	ENA|MKGO01000003|MKGO01000003.1	100	69	0	0	1	69	260533506	260533438	4.12e-28	128	ENA|MKGO01000003|MKGO01000003.1	69	69	69	0	100	1	-1	TGCAGCATTATCGGTGAGCGCGGATTAGGGCGCCAGCTTATGCTGGAGACCACGGGGAGGTGCGATGCA	TGCAGCATTATCGGTGAGCGCGGATTAGGGCGCCAGCTTATGCTGGAGACCACGGGGAGGTGCGATGCA	69	747046674	ENA|MKGO01000003|MKGO01000003.1 Triticum urartu cultivar G1812 chromosome 3, whole genome shotgun sequence.
SNP_1018927	ENA|MKGO01000005|MKGO01000005.1	100	69	0	0	1	69	323005624	323005692	4.12e-28	128	ENA|MKGO01000005|MKGO01000005.1	69	69	69	0	100	1	1	TGCAGCTGCTCACCACCATGCTCGGCTTCAACCGTCACCAAGAAAGGATCCACATCCTCAAAGATGTCA	TGCAGCTGCTCACCACCATGCTCGGCTTCAACCGTCACCAAGAAAGGATCCACATCCTCAAAGATGTCA	69	661480603	ENA|MKGO01000005|MKGO01000005.1 Triticum urartu cultivar G1812 chromosome 5, whole genome shotgun sequence.
SNP_1018927	ENA|MKGO01000005|MKGO01000005.1	95.652	69	3	0	1	69	322969556	322969624	4.15e-23	111	ENA|MKGO01000005|MKGO01000005.1	60	66	66	0	95.65	1	1	TGCAGCTGCTCACCACCATGCTCGGCTTCAACCGTCACCAAGAAAGGATCCACATCCTCAAAGATGTCA	TGCAGCTGCTCACCACCATGCTCGGCTTCAACCGTAACCAAGAAAGGATCCACATTCTAAAAGATGTCA	69	661480603	ENA|MKGO01000005|MKGO01000005.1 Triticum urartu cultivar G1812 chromosome 5, whole genome shotgun sequence.
SNP_1018927	ENA|MKGO01000005|MKGO01000005.1	95.652	69	3	0	1	69	323109217	323109285	4.15e-23	111	ENA|MKGO01000005|MKGO01000005.1	60	66	66	0	95.65	1	1	TGCAGCTGCTCACCACCATGCTCGGCTTCAACCGTCACCAAGAAAGGATCCACATCCTCAAAGATGTCA	TGCAGCTGCTCACCACCATGCTCGGCTTCAACCGTAACCAAGAAAGGATTCACATTCTCAAAGATGTCA	69	661480603	ENA|MKGO01000005|MKGO01000005.1 Triticum urartu cultivar G1812 chromosome 5, whole genome shotgun sequence.
SNP_1018927	ENA|MKGO01000592|MKGO01000592.1	95.652	69	3	0	1	69	11040	11108	4.15e-23	111	ENA|MKGO01000592|MKGO01000592.1	60	66	66	0	95.65	1	1	TGCAGCTGCTCACCACCATGCTCGGCTTCAACCGTCACCAAGAAAGGATCCACATCCTCAAAGATGTCA	TGCAGCTGCTCACCACCATGCTCGGCTTCAACCGTAACCAAGAAAGGATTCACATTCTCAAAGATGTCA	69	15346	ENA|MKGO01000592|MKGO01000592.1 Triticum urartu cultivar G1812 TuUngrouped_contig_741, whole genome shotgun sequence.
SNP_1019940	ENA|MKGO01000004|MKGO01000004.1	100	69	0	0	1	69	597582041	597582109	4.12e-28	128	ENA|MKGO01000004|MKGO01000004.1	69	69	69	0	100	1	1	TGCAGGTGCTGAGCGCGCTGGACGCGGCCAAGACGCAGTGGTACCACTTCACGGCCATCGTCGTCGCCG	TGCAGGTGCTGAGCGCGCTGGACGCGGCCAAGACGCAGTGGTACCACTTCACGGCCATCGTCGTCGCCG	69	619584425	ENA|MKGO01000004|MKGO01000004.1 Triticum urartu cultivar G1812 chromosome 4, whole genome shotgun sequence.
SNP_1019940	ENA|MKGO01000004|MKGO01000004.1	100	69	0	0	1	69	597593110	597593042	4.12e-28	128	ENA|MKGO01000004|MKGO01000004.1	69	69	69	0	100	1	-1	TGCAGGTGCTGAGCGCGCTGGACGCGGCCAAGACGCAGTGGTACCACTTCACGGCCATCGTCGTCGCCG	TGCAGGTGCTGAGCGCGCTGGACGCGGCCAAGACGCAGTGGTACCACTTCACGGCCATCGTCGTCGCCG	69	619584425	ENA|MKGO01000004|MKGO01000004.1 Triticum urartu cultivar G1812 chromosome 4, whole genome shotgun sequence.
SNP_1019940	ENA|MKGO01000005|MKGO01000005.1	91.304	69	6	0	1	69	598051638	598051706	4.18e-18	95.3	ENA|MKGO01000005|MKGO01000005.1	51	63	63	0	91.3	1	1	TGCAGGTGCTGAGCGCGCTGGACGCGGCCAAGACGCAGTGGTACCACTTCACGGCCATCGTCGTCGCCG	TGGAGGTGCTCACGGCGCTGGACGCCGCCAAGACGCAGTGGTACCACTTCACGGCCATCGTCATCGCCG	69	661480603	ENA|MKGO01000005|MKGO01000005.1 Triticum urartu cultivar G1812 chromosome 5, whole genome shotgun sequence.
SNP_1020290	ENA|MKGO01000002|MKGO01000002.1	100	69	0	0	1	69	420123326	420123394	4.12e-28	128	ENA|MKGO01000002|MKGO01000002.1	69	69	69	0	100	1	1	TGCAGCATCGCCGAGAGATCGTTGCTGGCTAGCTCGTCCCATGACCAGTTCCAGTAGGCCTGTGGGGGT	TGCAGCATCGCCGAGAGATCGTTGCTGGCTAGCTCGTCCCATGACCAGTTCCAGTAGGCCTGTGGGGGT	69	753719114	ENA|MKGO01000002|MKGO01000002.1 Triticum urartu cultivar G1812 chromosome 2, whole genome shotgun sequence.
SNP_1020717	ENA|MKGO01004733|MKGO01004733.1	93.443	61	4	0	1	61	16375	16435	5.41e-17	91.6	ENA|MKGO01004733|MKGO01004733.1	49	57	57	0	93.44	1	1	TGCAGGTAGTCCAGCTTCGCCTTCTCCAGTTCCGCCATCACGCGATCCGCCTTGTATATCC	TGCAGGTAGTCCAGCTTCGCCTTCTCCAGATCCATCATCACGCGGTCCGCCTTGTATATCC	69	20111	ENA|MKGO01004733|MKGO01004733.1 Triticum urartu cultivar G1812 TuUngrouped_contig_5024, whole genome shotgun sequence.
SNP_1020730	ENA|MKGO01000002|MKGO01000002.1	100	69	0	0	1	69	1298695	1298763	4.12e-28	128	ENA|MKGO01000002|MKGO01000002.1	69	69	69	0	100	1	1	TGCAGCTTGCTGAGGACGGCGAGGGCGCTTGCGGCGGAAAGATCCATGGACGCGGGGGAGGCCTCGCCG	TGCAGCTTGCTGAGGACGGCGAGGGCGCTTGCGGCGGAAAGATCCATGGACGCGGGGGAGGCCTCGCCG	69	753719114	ENA|MKGO01000002|MKGO01000002.1 Triticum urartu cultivar G1812 chromosome 2, whole genome shotgun sequence.
SNP_1020871	ENA|MKGO01000002|MKGO01000002.1	97.101	69	2	0	1	69	35110472	35110540	8.92e-25	117	ENA|MKGO01000002|MKGO01000002.1	63	67	67	0	97.1	1	1	TGCAGTAGCAAAAAGCACAAAGCCCAGAAGCTAAACAAAAAAGGTCCTCTTGTTTCTACAGGCTCCTAA	TGCAGTAACAAAAAGCACAAAGCCCAGAAGCTAAACAAAAAAGGTCCTCTTGTTTCTACAGGCTCGTAA	69	753719114	ENA|MKGO01000002|MKGO01000002.1 Triticum urartu cultivar G1812 chromosome 2, whole genome shotgun sequence.
SNP_1020900	ENA|MKGO01000002|MKGO01000002.1	97.101	69	2	0	1	69	62319945	62320013	8.92e-25	117	ENA|MKGO01000002|MKGO01000002.1	63	67	67	0	97.1	1	1	TGCAGCTGTGGATTGTGCGTAGCATTCTCAGCTACCCCATCTTCTACCTCTTCCCGTCCCTCACCAAGA	TGCAGCTGTGGATTGTGCGTAGCATTCTCAGCTACCCCATCTTCTACCTCTGCCCATCCCTCACCAAGA	69	753719114	ENA|MKGO01000002|MKGO01000002.1 Triticum urartu cultivar G1812 chromosome 2, whole genome shotgun sequence.
SNP_1021118	ENA|MKGO01000001|MKGO01000001.1	98.387	62	1	0	1	62	2880076	2880015	1.49e-22	110	ENA|MKGO01000001|MKGO01000001.1	59	61	61	0	98.39	1	-1	TGCAGGTTCACAAACTGCTGCTTCTTGGTCTTGTGGTTGGAGAAGGACACCTTGTTGGCCCG	TGCAGGTTCACAAATTGCTGCTTCTTGGTCTTGTGGTTGGAGAAGGACACCTTGTTGGCCCG	69	584211917	ENA|MKGO01000001|MKGO01000001.1 Triticum urartu cultivar G1812 chromosome 1, whole genome shotgun sequence.
SNP_1021118	ENA|MKGO01000001|MKGO01000001.1	91.667	60	5	0	1	60	8918136	8918195	9.05e-15	84.2	ENA|MKGO01000001|MKGO01000001.1	45	55	55	0	91.67	1	1	TGCAGGTTCACAAACTGCTGCTTCTTGGTCTTGTGGTTGGAGAAGGACACCTTGTTGGCC	TGCAGATTGATAAACTGCTGTTTCTTGGTCTTGTGGTTGGAGAAGGACACCTTGTTAGCC	69	584211917	ENA|MKGO01000001|MKGO01000001.1 Triticum urartu cultivar G1812 chromosome 1, whole genome shotgun sequence.
SNP_1021879	ENA|MKGO01000006|MKGO01000006.1	96.667	60	2	0	1	60	478158893	478158952	8.98e-20	100	ENA|MKGO01000006|MKGO01000006.1	54	58	58	0	96.67	1	1	TGCAGCAGCCGCTCCACCACGTGGCTGAGGCAGCACCCGCGCCTCCCCACCACCAGCACC	TGCACCAGCCGCTTCACCACGTGGCTGAGGCAGCACCCGCGCCTCCCCACCACCAGCACC	69	575865107	ENA|MKGO01000006|MKGO01000006.1 Triticum urartu cultivar G1812 chromosome 6, whole genome shotgun sequence.
SNP_1021879	ENA|MKGO01000005|MKGO01000005.1	95	60	3	0	1	60	71598117	71598058	4.18e-18	95.3	ENA|MKGO01000005|MKGO01000005.1	51	57	57	0	95	1	-1	TGCAGCAGCCGCTCCACCACGTGGCTGAGGCAGCACCCGCGCCTCCCCACCACCAGCACC	TGCAACAGCCGCTTCACCACGTGGCTGAGGTAGCACCCGCGCCTCCCCACCACCAGCACC	69	661480603	ENA|MKGO01000005|MKGO01000005.1 Triticum urartu cultivar G1812 chromosome 5, whole genome shotgun sequence.
SNP_1021879	ENA|MKGO01000005|MKGO01000005.1	93.333	60	4	0	1	60	223878691	223878632	1.94e-16	89.8	ENA|MKGO01000005|MKGO01000005.1	48	56	56	0	93.33	1	-1	TGCAGCAGCCGCTCCACCACGTGGCTGAGGCAGCACCCGCGCCTCCCCACCACCAGCACC	TGCAACAGCCGATTCACCACGTGGCTGAGGTAGCACCCGCGCCTCCCCACCACCAGCACC	69	661480603	ENA|MKGO01000005|MKGO01000005.1 Triticum urartu cultivar G1812 chromosome 5, whole genome shotgun sequence.
SNP_1021879	ENA|MKGO01000004|MKGO01000004.1	93.333	60	4	0	1	60	38526954	38527013	1.94e-16	89.8	ENA|MKGO01000004|MKGO01000004.1	48	56	56	0	93.33	1	1	TGCAGCAGCCGCTCCACCACGTGGCTGAGGCAGCACCCGCGCCTCCCCACCACCAGCACC	TGCAACAGCTGCTTCACCACGTGGCTGAGGTAGCACCCGCGCCTCCCCACCACCAGCACC	69	619584425	ENA|MKGO01000004|MKGO01000004.1 Triticum urartu cultivar G1812 chromosome 4, whole genome shotgun sequence.
SNP_1021879	ENA|MKGO01000004|MKGO01000004.1	93.333	60	4	0	1	60	38633099	38633158	1.94e-16	89.8	ENA|MKGO01000004|MKGO01000004.1	48	56	56	0	93.33	1	1	TGCAGCAGCCGCTCCACCACGTGGCTGAGGCAGCACCCGCGCCTCCCCACCACCAGCACC	TGCAACAGCTGCTTCACCACGTGGCTGAGGTAGCACCCGCGCCTCCCCACCACCAGCACC	69	619584425	ENA|MKGO01000004|MKGO01000004.1 Triticum urartu cultivar G1812 chromosome 4, whole genome shotgun sequence.
SNP_1022736	ENA|MKGO01000003|MKGO01000003.1	100	68	0	0	1	68	16780636	16780703	1.48e-27	126	ENA|MKGO01000003|MKGO01000003.1	68	68	68	0	100	1	1	TGCAGGAGTCCGATCCGCAGCAGTACACGGACACTTTCATCGCCGCTCTAGTCACCGTGAGTACTCCT	TGCAGGAGTCCGATCCGCAGCAGTACACGGACACTTTCATCGCCGCTCTAGTCACCGTGAGTACTCCT	69	747046674	ENA|MKGO01000003|MKGO01000003.1 Triticum urartu cultivar G1812 chromosome 3, whole genome shotgun sequence.
SNP_1022736	ENA|MKGO01000003|MKGO01000003.1	100	68	0	0	1	68	16829853	16829920	1.48e-27	126	ENA|MKGO01000003|MKGO01000003.1	68	68	68	0	100	1	1	TGCAGGAGTCCGATCCGCAGCAGTACACGGACACTTTCATCGCCGCTCTAGTCACCGTGAGTACTCCT	TGCAGGAGTCCGATCCGCAGCAGTACACGGACACTTTCATCGCCGCTCTAGTCACCGTGAGTACTCCT	69	747046674	ENA|MKGO01000003|MKGO01000003.1 Triticum urartu cultivar G1812 chromosome 3, whole genome shotgun sequence.
SNP_1023386	ENA|MKGO01000005|MKGO01000005.1	100	61	0	0	1	61	515618840	515618780	1.15e-23	113	ENA|MKGO01000005|MKGO01000005.1	61	61	61	0	100	1	-1	TGCAGCAGCACCACCTCCTGGTGCTCCGCCTCCAGGTCAGGATGCAGCTTCAGAAGCTCCG	TGCAGCAGCACCACCTCCTGGTGCTCCGCCTCCAGGTCAGGATGCAGCTTCAGAAGCTCCG	69	661480603	ENA|MKGO01000005|MKGO01000005.1 Triticum urartu cultivar G1812 chromosome 5, whole genome shotgun sequence.
SNP_1023386	ENA|MKGO01000005|MKGO01000005.1	90.164	61	6	0	1	61	484960792	484960732	1.17e-13	80.5	ENA|MKGO01000005|MKGO01000005.1	43	55	55	0	90.16	1	-1	TGCAGCAGCACCACCTCCTGGTGCTCCGCCTCCAGGTCAGGATGCAGCTTCAGAAGCTCCG	TGCAGCAGCACCACCTCCTGGTGCTCCGCGTCCAGGTCCGGGTGCAGCTTGAGCAGCGCCG	69	661480603	ENA|MKGO01000005|MKGO01000005.1 Triticum urartu cultivar G1812 chromosome 5, whole genome shotgun sequence.
SNP_1023913	ENA|MKGO01000004|MKGO01000004.1	100	61	0	0	1	61	104985195	104985255	1.15e-23	113	ENA|MKGO01000004|MKGO01000004.1	61	61	61	0	100	1	1	TGCAGAAGAGCCTTAGCCTTTCCGACGAGCAGGTGGAGGCATCACGCATGACGCTGCACCG	TGCAGAAGAGCCTTAGCCTTTCCGACGAGCAGGTGGAGGCATCACGCATGACGCTGCACCG	69	619584425	ENA|MKGO01000004|MKGO01000004.1 Triticum urartu cultivar G1812 chromosome 4, whole genome shotgun sequence.
SNP_1023913	ENA|MKGO01006577|MKGO01006577.1	98.361	61	1	0	1	61	12921	12861	5.37e-22	108	ENA|MKGO01006577|MKGO01006577.1	58	60	60	0	98.36	1	-1	TGCAGAAGAGCCTTAGCCTTTCCGACGAGCAGGTGGAGGCATCACGCATGACGCTGCACCG	TGCAGAAGAGCCTTAGCCTTTCCGACGAGCAGGTGGAGGCATCACGCATGACACTGCACCG	69	13896	ENA|MKGO01006577|MKGO01006577.1 Triticum urartu cultivar G1812 TuUngrouped_contig_6870, whole genome shotgun sequence.
SNP_1024358	ENA|MKGO01000002|MKGO01000002.1	100	65	0	0	1	65	60291005	60291069	6.9e-26	121	ENA|MKGO01000002|MKGO01000002.1	65	65	65	0	100	1	1	TGCAGGCAGCAGCGCACACGCCATGGTTGGACTCTGCCTCCCAAGGGTTTGCGCCAAGAGCGCCG	TGCAGGCAGCAGCGCACACGCCATGGTTGGACTCTGCCTCCCAAGGGTTTGCGCCAAGAGCGCCG	69	753719114	ENA|MKGO01000002|MKGO01000002.1 Triticum urartu cultivar G1812 chromosome 2, whole genome shotgun sequence.
SNP_1025773	ENA|MKGO01000005|MKGO01000005.1	98.551	69	1	0	1	69	621716882	621716950	1.92e-26	122	ENA|MKGO01000005|MKGO01000005.1	66	68	68	0	98.55	1	1	TGCAGCTTTGGCACGCTGATGACGGCGACGCTGGACTGGGAGGGCATCCCGGCGTACGTGATCAGCCTG	TGCAGCTTTGGCACGCTGATGACGGCGACGCTGGACTGGGAGGGCATCCCGGCGTACGTGACCAGCCTG	69	661480603	ENA|MKGO01000005|MKGO01000005.1 Triticum urartu cultivar G1812 chromosome 5, whole genome shotgun sequence.
SNP_1025919	ENA|MKGO01000006|MKGO01000006.1	100	69	0	0	1	69	36518042	36517974	4.12e-28	128	ENA|MKGO01000006|MKGO01000006.1	69	69	69	0	100	1	-1	TGCAGTTTGCCGATGGGAGGCAGCAACAAGCTGCGTGCTAGCGTTGCGGCGGTGGGGGCCTTATCTGCC	TGCAGTTTGCCGATGGGAGGCAGCAACAAGCTGCGTGCTAGCGTTGCGGCGGTGGGGGCCTTATCTGCC	69	575865107	ENA|MKGO01000006|MKGO01000006.1 Triticum urartu cultivar G1812 chromosome 6, whole genome shotgun sequence.
SNP_1026364	ENA|MKGO01000004|MKGO01000004.1	98.551	69	1	0	1	69	8541296	8541228	1.92e-26	122	ENA|MKGO01000004|MKGO01000004.1	66	68	68	0	98.55	1	-1	TGCAGCATCCGCACCACGGTGCTGGGCGGCAGCTGGTGCGACGCCATCGTGCCCCAGTTCACCCCGAGC	TGCAGCATCTGCACCACGGTGCTGGGCGGCAGCTGGTGCGACGCCATCGTGCCCCAGTTCACCCCGAGC	69	619584425	ENA|MKGO01000004|MKGO01000004.1 Triticum urartu cultivar G1812 chromosome 4, whole genome shotgun sequence.
SNP_1026386	ENA|MKGO01000001|MKGO01000001.1	100	53	0	0	1	53	99143735	99143683	3.23e-19	99	ENA|MKGO01000001|MKGO01000001.1	53	53	53	0	100	1	-1	TGCAGCACGACCTCCTGGTCAGCGACGGCGAGGGCGGCGCCGCCAAGGGCCCG	TGCAGCACGACCTCCTGGTCAGCGACGGCGAGGGCGGCGCCGCCAAGGGCCCG	69	584211917	ENA|MKGO01000001|MKGO01000001.1 Triticum urartu cultivar G1812 chromosome 1, whole genome shotgun sequence.
SNP_1026430	ENA|MKGO01000005|MKGO01000005.1	100	58	0	0	1	58	129335070	129335127	5.37e-22	108	ENA|MKGO01000005|MKGO01000005.1	58	58	58	0	100	1	1	TGCAGACGACGACCTGCTCGCTGGTTTCGGAACCAAGTCAGAGGCGAGGGAGGTGCCG	TGCAGACGACGACCTGCTCGCTGGTTTCGGAACCAAGTCAGAGGCGAGGGAGGTGCCG	69	661480603	ENA|MKGO01000005|MKGO01000005.1 Triticum urartu cultivar G1812 chromosome 5, whole genome shotgun sequence.
SNP_1027229	ENA|MKGO01000007|MKGO01000007.1	97.101	69	1	1	1	69	685303630	685303563	3.21e-24	115	ENA|MKGO01000007|MKGO01000007.1	62	67	67	1	97.1	1	-1	TGCAGTAAGAAGCGACAGCAGCTGGGCGCTGCGTGGGCGTTGGCGCGCGCGGAGGCGCGACCATGGGTG	TGCAG-AAGAAGCGACAGCAGCTGGGCGCTGCGTGGGCGTTGGCGCGCGCGGAGGCGCGGCCATGGGTG	69	719689837	ENA|MKGO01000007|MKGO01000007.1 Triticum urartu cultivar G1812 chromosome 7, whole genome shotgun sequence.
SNP_1027229	ENA|MKGO01000007|MKGO01000007.1	97.101	69	1	1	1	69	692282246	692282179	3.21e-24	115	ENA|MKGO01000007|MKGO01000007.1	62	67	67	1	97.1	1	-1	TGCAGTAAGAAGCGACAGCAGCTGGGCGCTGCGTGGGCGTTGGCGCGCGCGGAGGCGCGACCATGGGTG	TGCAG-AAGAAGCGACAGCAGCTGGGCGCTGCGTGGGCGTTGGCGCGCGCGGAGGCGCGGCCATGGGTG	69	719689837	ENA|MKGO01000007|MKGO01000007.1 Triticum urartu cultivar G1812 chromosome 7, whole genome shotgun sequence.
SNP_1027956	ENA|MKGO01000007|MKGO01000007.1	100	69	0	0	1	69	185475511	185475579	4.12e-28	128	ENA|MKGO01000007|MKGO01000007.1	69	69	69	0	100	1	1	TGCAGCTTTTCTCATTAATCTCCAGATTATTTGTACATCAACTAAGGAACAGAAAAACCTCCACGCTGC	TGCAGCTTTTCTCATTAATCTCCAGATTATTTGTACATCAACTAAGGAACAGAAAAACCTCCACGCTGC	69	719689837	ENA|MKGO01000007|MKGO01000007.1 Triticum urartu cultivar G1812 chromosome 7, whole genome shotgun sequence.
SNP_1027956	ENA|MKGO01000007|MKGO01000007.1	98.507	67	1	0	3	69	185470669	185470735	2.48e-25	119	ENA|MKGO01000007|MKGO01000007.1	64	66	66	0	98.51	1	1	CAGCTTTTCTCATTAATCTCCAGATTATTTGTACATCAACTAAGGAACAGAAAAACCTCCACGCTGC	CAGCTTTTCTCATTAATCTCCAGATTATTTGTACATCAACTAAGGAACAGAAAAATCTCCACGCTGC	69	719689837	ENA|MKGO01000007|MKGO01000007.1 Triticum urartu cultivar G1812 chromosome 7, whole genome shotgun sequence.
SNP_1027956	ENA|MKGO01000002|MKGO01000002.1	100	67	0	0	3	69	609087135	609087201	5.33e-27	124	ENA|MKGO01000002|MKGO01000002.1	67	67	67	0	100	1	1	CAGCTTTTCTCATTAATCTCCAGATTATTTGTACATCAACTAAGGAACAGAAAAACCTCCACGCTGC	CAGCTTTTCTCATTAATCTCCAGATTATTTGTACATCAACTAAGGAACAGAAAAACCTCCACGCTGC	69	753719114	ENA|MKGO01000002|MKGO01000002.1 Triticum urartu cultivar G1812 chromosome 2, whole genome shotgun sequence.
SNP_1027956	ENA|MKGO01000002|MKGO01000002.1	98.551	69	1	0	1	69	609082297	609082365	1.92e-26	122	ENA|MKGO01000002|MKGO01000002.1	66	68	68	0	98.55	1	1	TGCAGCTTTTCTCATTAATCTCCAGATTATTTGTACATCAACTAAGGAACAGAAAAACCTCCACGCTGC	TGCAGCTTTTCTCATTAATCTGCAGATTATTTGTACATCAACTAAGGAACAGAAAAACCTCCACGCTGC	69	753719114	ENA|MKGO01000002|MKGO01000002.1 Triticum urartu cultivar G1812 chromosome 2, whole genome shotgun sequence.
SNP_1027956	ENA|MKGO01000006|MKGO01000006.1	97.101	69	2	0	1	69	41020683	41020615	8.92e-25	117	ENA|MKGO01000006|MKGO01000006.1	63	67	67	0	97.1	1	-1	TGCAGCTTTTCTCATTAATCTCCAGATTATTTGTACATCAACTAAGGAACAGAAAAACCTCCACGCTGC	TGCAGCTTTTCTCCTTAATCTCCAGATTATTTGTACATCAACTAAGAAACAGAAAAACCTCCACGCTGC	69	575865107	ENA|MKGO01000006|MKGO01000006.1 Triticum urartu cultivar G1812 chromosome 6, whole genome shotgun sequence.
SNP_1027956	ENA|MKGO01000006|MKGO01000006.1	97.101	69	2	0	1	69	42790400	42790332	8.92e-25	117	ENA|MKGO01000006|MKGO01000006.1	63	67	67	0	97.1	1	-1	TGCAGCTTTTCTCATTAATCTCCAGATTATTTGTACATCAACTAAGGAACAGAAAAACCTCCACGCTGC	TGCAGCTTTTCTCCTTAATCTCCAGATTATTTGTACATCAACTAAGAAACAGAAAAACCTCCACGCTGC	69	575865107	ENA|MKGO01000006|MKGO01000006.1 Triticum urartu cultivar G1812 chromosome 6, whole genome shotgun sequence.
SNP_1027956	ENA|MKGO01000004|MKGO01000004.1	92.754	69	5	0	1	69	63396748	63396680	8.98e-20	100	ENA|MKGO01000004|MKGO01000004.1	54	64	64	0	92.75	1	-1	TGCAGCTTTTCTCATTAATCTCCAGATTATTTGTACATCAACTAAGGAACAGAAAAACCTCCACGCTGC	TGCAACTTTTCTCATTAATCTTTAGATTATTTGTACATCAACTAAGGAACAGGAAAACCTTCACGCTGC	69	619584425	ENA|MKGO01000004|MKGO01000004.1 Triticum urartu cultivar G1812 chromosome 4, whole genome shotgun sequence.
SNP_1028001	ENA|MKGO01000006|MKGO01000006.1	98.551	69	1	0	1	69	10320036	10319968	1.92e-26	122	ENA|MKGO01000006|MKGO01000006.1	66	68	68	0	98.55	1	-1	TGCAGTAATTCCTTTGACTTCCTCAGCACACACGGAGCCTTACGCAGAGCAATGCTCACCTCAGCGTCT	TGCAGTAATTCCTTTGACTTCCTCAGCACACACGGAGCCATACGCAGAGCAATGCTCACCTCAGCGTCT	69	575865107	ENA|MKGO01000006|MKGO01000006.1 Triticum urartu cultivar G1812 chromosome 6, whole genome shotgun sequence.
SNP_1028001	ENA|MKGO01000006|MKGO01000006.1	98.551	69	1	0	1	69	10504401	10504333	1.92e-26	122	ENA|MKGO01000006|MKGO01000006.1	66	68	68	0	98.55	1	-1	TGCAGTAATTCCTTTGACTTCCTCAGCACACACGGAGCCTTACGCAGAGCAATGCTCACCTCAGCGTCT	TGCAGTAATTCCTTTGACTTCCTCAGCACACACGGAGCCATACGCAGAGCAATGCTCACCTCAGCGTCT	69	575865107	ENA|MKGO01000006|MKGO01000006.1 Triticum urartu cultivar G1812 chromosome 6, whole genome shotgun sequence.
SNP_1028001	ENA|MKGO01000006|MKGO01000006.1	92.754	69	5	0	1	69	10301139	10301071	8.98e-20	100	ENA|MKGO01000006|MKGO01000006.1	54	64	64	0	92.75	1	-1	TGCAGTAATTCCTTTGACTTCCTCAGCACACACGGAGCCTTACGCAGAGCAATGCTCACCTCAGCGTCT	TGCAGTAATTCCTTTGACTTCCTCAGCAGACACAGAGCGTTACGCACAACAATGCTCACCTCAGCGTCT	69	575865107	ENA|MKGO01000006|MKGO01000006.1 Triticum urartu cultivar G1812 chromosome 6, whole genome shotgun sequence.
SNP_1028001	ENA|MKGO01000006|MKGO01000006.1	92.754	69	5	0	1	69	10485480	10485412	8.98e-20	100	ENA|MKGO01000006|MKGO01000006.1	54	64	64	0	92.75	1	-1	TGCAGTAATTCCTTTGACTTCCTCAGCACACACGGAGCCTTACGCAGAGCAATGCTCACCTCAGCGTCT	TGCAGTAATTCCTTTGACTTCCTCAGCAGACACAGAGCGTTACGCACAACAATGCTCACCTCAGCGTCT	69	575865107	ENA|MKGO01000006|MKGO01000006.1 Triticum urartu cultivar G1812 chromosome 6, whole genome shotgun sequence.
SNP_1028001	ENA|MKGO01007830|MKGO01007830.1	92.754	69	5	0	1	69	15763	15695	8.98e-20	100	ENA|MKGO01007830|MKGO01007830.1	54	64	64	0	92.75	1	-1	TGCAGTAATTCCTTTGACTTCCTCAGCACACACGGAGCCTTACGCAGAGCAATGCTCACCTCAGCGTCT	TGCAGTAATTCCTTTGACTTCCTCAGCAGACACAGAGCGTTACGCACAACAATGCTCACCTCAGCGTCT	69	22864	ENA|MKGO01007830|MKGO01007830.1 Triticum urartu cultivar G1812 TuUngrouped_contig_8129, whole genome shotgun sequence.
SNP_1028598	ENA|MKGO01000007|MKGO01000007.1	98.551	69	1	0	1	69	699184719	699184787	1.92e-26	122	ENA|MKGO01000007|MKGO01000007.1	66	68	68	0	98.55	1	1	TGCAGTGTCCCGGCGGCGCTTAGCGGCACGCTCTTCCTTGTGCGCGTTTTGGTGGCCGCCGAGCGCCTG	TGCAGTGTCCCGGCGGCGTTTAGCGGCACGCTCTTCCTTGTGCGCGTTTTGGTGGCCGCCGAGCGCCTG	69	719689837	ENA|MKGO01000007|MKGO01000007.1 Triticum urartu cultivar G1812 chromosome 7, whole genome shotgun sequence.
SNP_1029027	ENA|MKGO01000005|MKGO01000005.1	100	69	0	0	1	69	561772984	561772916	4.12e-28	128	ENA|MKGO01000005|MKGO01000005.1	69	69	69	0	100	1	-1	TGCAGGAGGGGAGAACACAAGGCCTCGCTCATCTATCACTAGCATGGGCAGCAAGATGGGCAGTCAGTT	TGCAGGAGGGGAGAACACAAGGCCTCGCTCATCTATCACTAGCATGGGCAGCAAGATGGGCAGTCAGTT	69	661480603	ENA|MKGO01000005|MKGO01000005.1 Triticum urartu cultivar G1812 chromosome 5, whole genome shotgun sequence.
SNP_1030397	ENA|MKGO01000005|MKGO01000005.1	100	60	0	0	1	60	621415369	621415310	4.15e-23	111	ENA|MKGO01000005|MKGO01000005.1	60	60	60	0	100	1	-1	TGCAGGAGCAGTGCTCGCCGCAGGTGCAGGTGGTGTGCGCCACGGCCGCGGGGTTCACCG	TGCAGGAGCAGTGCTCGCCGCAGGTGCAGGTGGTGTGCGCCACGGCCGCGGGGTTCACCG	69	661480603	ENA|MKGO01000005|MKGO01000005.1 Triticum urartu cultivar G1812 chromosome 5, whole genome shotgun sequence.
SNP_1030645	ENA|MKGO01000003|MKGO01000003.1	98.182	55	1	0	15	69	28636928	28636982	1.16e-18	97.1	ENA|MKGO01000003|MKGO01000003.1	52	54	54	0	98.18	1	1	CCGCCTGCTGCTCCGTGCGGCTGCTTGCCGCGGCTCCTTCTGCCGCTGCTACTTC	CCGCCTGCTGCTCCGTGCGGCTGCTTGCCGCGGCTCCTTCTGCTGCTGCTACTTC	69	747046674	ENA|MKGO01000003|MKGO01000003.1 Triticum urartu cultivar G1812 chromosome 3, whole genome shotgun sequence.
SNP_1030645	ENA|MKGO01000003|MKGO01000003.1	98.182	55	1	0	15	69	659961134	659961188	1.16e-18	97.1	ENA|MKGO01000003|MKGO01000003.1	52	54	54	0	98.18	1	1	CCGCCTGCTGCTCCGTGCGGCTGCTTGCCGCGGCTCCTTCTGCCGCTGCTACTTC	CCGCCTGCTGCTCCGTGCGGCTGCTTGCCGCGGCTCCTTCTGCTGCTGCTACTTC	69	747046674	ENA|MKGO01000003|MKGO01000003.1 Triticum urartu cultivar G1812 chromosome 3, whole genome shotgun sequence.
SNP_1030675	ENA|MKGO01000005|MKGO01000005.1	100	69	0	0	1	69	560472459	560472391	4.12e-28	128	ENA|MKGO01000005|MKGO01000005.1	69	69	69	0	100	1	-1	TGCAGCCTTATTTCGCTGCTGCGGCGACAACGAACTGGTTGCTGCTGTCACATTGGTGAATCGGTGATG	TGCAGCCTTATTTCGCTGCTGCGGCGACAACGAACTGGTTGCTGCTGTCACATTGGTGAATCGGTGATG	69	661480603	ENA|MKGO01000005|MKGO01000005.1 Triticum urartu cultivar G1812 chromosome 5, whole genome shotgun sequence.
SNP_1031253	ENA|MKGO01000006|MKGO01000006.1	100	69	0	0	1	69	381697873	381697805	4.12e-28	128	ENA|MKGO01000006|MKGO01000006.1	69	69	69	0	100	1	-1	TGCAGTGTCTTCATAATCCCATCTGATTTGGAATATTGCTCCACTGATGAGACAACAGATATCTCGGGC	TGCAGTGTCTTCATAATCCCATCTGATTTGGAATATTGCTCCACTGATGAGACAACAGATATCTCGGGC	69	575865107	ENA|MKGO01000006|MKGO01000006.1 Triticum urartu cultivar G1812 chromosome 6, whole genome shotgun sequence.
SNP_1031253	ENA|MKGO01000006|MKGO01000006.1	100	69	0	0	1	69	381729894	381729826	4.12e-28	128	ENA|MKGO01000006|MKGO01000006.1	69	69	69	0	100	1	-1	TGCAGTGTCTTCATAATCCCATCTGATTTGGAATATTGCTCCACTGATGAGACAACAGATATCTCGGGC	TGCAGTGTCTTCATAATCCCATCTGATTTGGAATATTGCTCCACTGATGAGACAACAGATATCTCGGGC	69	575865107	ENA|MKGO01000006|MKGO01000006.1 Triticum urartu cultivar G1812 chromosome 6, whole genome shotgun sequence.
SNP_1031304	ENA|MKGO01000005|MKGO01000005.1	98.551	69	1	0	1	69	579213049	579212981	1.92e-26	122	ENA|MKGO01000005|MKGO01000005.1	66	68	68	0	98.55	1	-1	TGCAGTGAGTGCTCCGAGCTCTCCTTTCGCGGCTAAATCGTCCCCGTTTTGACTTTTGAGATTCCGCGG	TGCAGTGAGTGCTCCGAGCTCTCCTTTCGCGGCTAAATCGTCCCCGTTTTGACTTTTGAGATTCCACGG	69	661480603	ENA|MKGO01000005|MKGO01000005.1 Triticum urartu cultivar G1812 chromosome 5, whole genome shotgun sequence.
SNP_1031807	ENA|MKGO01000007|MKGO01000007.1	100	69	0	0	1	69	622362686	622362618	4.12e-28	128	ENA|MKGO01000007|MKGO01000007.1	69	69	69	0	100	1	-1	TGCAGGAAGTTGGATCTGCATCCAAGTATCCAACAATTCTTTTTACGTTAACATGAAACTGCATCCTCC	TGCAGGAAGTTGGATCTGCATCCAAGTATCCAACAATTCTTTTTACGTTAACATGAAACTGCATCCTCC	69	719689837	ENA|MKGO01000007|MKGO01000007.1 Triticum urartu cultivar G1812 chromosome 7, whole genome shotgun sequence.
SNP_1031807	ENA|MKGO01000007|MKGO01000007.1	94.118	68	4	0	1	68	626788544	626788611	6.94e-21	104	ENA|MKGO01000007|MKGO01000007.1	56	64	64	0	94.12	1	1	TGCAGGAAGTTGGATCTGCATCCAAGTATCCAACAATTCTTTTTACGTTAACATGAAACTGCATCCTC	TGCAGGAAGTTGGATCTGCATCCAAGTATCCAACAGTTCTTTTAAATTTAACATGAAACTGCATCCTC	69	719689837	ENA|MKGO01000007|MKGO01000007.1 Triticum urartu cultivar G1812 chromosome 7, whole genome shotgun sequence.
SNP_1031807	ENA|MKGO01008333|MKGO01008333.1	94.118	68	4	0	1	68	5294	5361	6.94e-21	104	ENA|MKGO01008333|MKGO01008333.1	56	64	64	0	94.12	1	1	TGCAGGAAGTTGGATCTGCATCCAAGTATCCAACAATTCTTTTTACGTTAACATGAAACTGCATCCTC	TGCAGGAAGTTGGATCTGCATCCAAGTATCCAACAGTTCTTTTAAATTTAACATGAAACTGCATCCTC	69	18075	ENA|MKGO01008333|MKGO01008333.1 Triticum urartu cultivar G1812 TuUngrouped_contig_8633, whole genome shotgun sequence.
SNP_1032177	ENA|MKGO01000002|MKGO01000002.1	100	69	0	0	1	69	631555257	631555189	4.12e-28	128	ENA|MKGO01000002|MKGO01000002.1	69	69	69	0	100	1	-1	TGCAGCAAGAAATCATCAAAGCGAGCAGGAGGACTCCACCTATGGAATCCCCTTGACGAATTTGAAGCT	TGCAGCAAGAAATCATCAAAGCGAGCAGGAGGACTCCACCTATGGAATCCCCTTGACGAATTTGAAGCT	69	753719114	ENA|MKGO01000002|MKGO01000002.1 Triticum urartu cultivar G1812 chromosome 2, whole genome shotgun sequence.
SNP_1032294	ENA|MKGO01000001|MKGO01000001.1	100	69	0	0	1	69	210083891	210083959	4.12e-28	128	ENA|MKGO01000001|MKGO01000001.1	69	69	69	0	100	1	1	TGCAGATCAGATCAGATTGCGTTCTGGAACTTACTGGTTTGAGGTTCTGTCGTTGCTTTTGCGGACAAA	TGCAGATCAGATCAGATTGCGTTCTGGAACTTACTGGTTTGAGGTTCTGTCGTTGCTTTTGCGGACAAA	69	584211917	ENA|MKGO01000001|MKGO01000001.1 Triticum urartu cultivar G1812 chromosome 1, whole genome shotgun sequence.
SNP_1032573	ENA|MKGO01000003|MKGO01000003.1	98.551	69	1	0	1	69	722281102	722281170	1.92e-26	122	ENA|MKGO01000003|MKGO01000003.1	66	68	68	0	98.55	1	1	TGCAGAAAACAATACATTGCTTTCCCACGAACACGAGTGAGCACGGGCTCCTCAATGCGTACGGCAGCG	TGCAGAAAACAATACATTGCTTTCCCACGAACACTAGTGAGCACGGGCTCCTCAATGCGTACGGCAGCG	69	747046674	ENA|MKGO01000003|MKGO01000003.1 Triticum urartu cultivar G1812 chromosome 3, whole genome shotgun sequence.
SNP_1032898	ENA|MKGO01005630|MKGO01005630.1	100	69	0	0	1	69	5680	5748	4.12e-28	128	ENA|MKGO01005630|MKGO01005630.1	69	69	69	0	100	1	1	TGCAGTCCTGTGTCATTCAAGCATGCCTGATTAGCTAATCATCATATATAGTGCATCAAAACTTACACC	TGCAGTCCTGTGTCATTCAAGCATGCCTGATTAGCTAATCATCATATATAGTGCATCAAAACTTACACC	69	8876	ENA|MKGO01005630|MKGO01005630.1 Triticum urartu cultivar G1812 TuUngrouped_contig_5922, whole genome shotgun sequence.
SNP_1032898	ENA|MKGO01000007|MKGO01000007.1	100	69	0	0	1	69	90384348	90384280	4.12e-28	128	ENA|MKGO01000007|MKGO01000007.1	69	69	69	0	100	1	-1	TGCAGTCCTGTGTCATTCAAGCATGCCTGATTAGCTAATCATCATATATAGTGCATCAAAACTTACACC	TGCAGTCCTGTGTCATTCAAGCATGCCTGATTAGCTAATCATCATATATAGTGCATCAAAACTTACACC	69	719689837	ENA|MKGO01000007|MKGO01000007.1 Triticum urartu cultivar G1812 chromosome 7, whole genome shotgun sequence.
SNP_1033285	ENA|MKGO01000005|MKGO01000005.1	100	69	0	0	1	69	481038070	481038002	4.12e-28	128	ENA|MKGO01000005|MKGO01000005.1	69	69	69	0	100	1	-1	TGCAGATATACATTTGTCAAGCAATAGGAGTCGGCGTACCCATGTGTCTTGAGACTCCACATGATGTAA	TGCAGATATACATTTGTCAAGCAATAGGAGTCGGCGTACCCATGTGTCTTGAGACTCCACATGATGTAA	69	661480603	ENA|MKGO01000005|MKGO01000005.1 Triticum urartu cultivar G1812 chromosome 5, whole genome shotgun sequence.
SNP_1033285	ENA|MKGO01000003|MKGO01000003.1	100	69	0	0	1	69	8496810	8496878	4.12e-28	128	ENA|MKGO01000003|MKGO01000003.1	69	69	69	0	100	1	1	TGCAGATATACATTTGTCAAGCAATAGGAGTCGGCGTACCCATGTGTCTTGAGACTCCACATGATGTAA	TGCAGATATACATTTGTCAAGCAATAGGAGTCGGCGTACCCATGTGTCTTGAGACTCCACATGATGTAA	69	747046674	ENA|MKGO01000003|MKGO01000003.1 Triticum urartu cultivar G1812 chromosome 3, whole genome shotgun sequence.
SNP_1033285	ENA|MKGO01000003|MKGO01000003.1	93.75	64	4	0	6	69	655865417	655865354	1.16e-18	97.1	ENA|MKGO01000003|MKGO01000003.1	52	60	60	0	93.75	1	-1	ATATACATTTGTCAAGCAATAGGAGTCGGCGTACCCATGTGTCTTGAGACTCCACATGATGTAA	ATATAAATTTGTCAAACAATAGGAGCCAGCGTACCCATGTGTCTTGAGACTCCACATGATGTAA	69	747046674	ENA|MKGO01000003|MKGO01000003.1 Triticum urartu cultivar G1812 chromosome 3, whole genome shotgun sequence.
SNP_1033285	ENA|MKGO01000003|MKGO01000003.1	93.75	64	4	0	6	69	655975212	655975149	1.16e-18	97.1	ENA|MKGO01000003|MKGO01000003.1	52	60	60	0	93.75	1	-1	ATATACATTTGTCAAGCAATAGGAGTCGGCGTACCCATGTGTCTTGAGACTCCACATGATGTAA	ATATAAATTTGTCAAACAATAGGAGCCAGCGTACCCATGTGTCTTGAGACTCCACATGATGTAA	69	747046674	ENA|MKGO01000003|MKGO01000003.1 Triticum urartu cultivar G1812 chromosome 3, whole genome shotgun sequence.
SNP_1033285	ENA|MKGO01003017|MKGO01003017.1	100	68	0	0	2	69	51516	51583	1.48e-27	126	ENA|MKGO01003017|MKGO01003017.1	68	68	68	0	100	1	1	GCAGATATACATTTGTCAAGCAATAGGAGTCGGCGTACCCATGTGTCTTGAGACTCCACATGATGTAA	GCAGATATACATTTGTCAAGCAATAGGAGTCGGCGTACCCATGTGTCTTGAGACTCCACATGATGTAA	69	81768	ENA|MKGO01003017|MKGO01003017.1 Triticum urartu cultivar G1812 TuUngrouped_contig_3265, whole genome shotgun sequence.
SNP_1033285	ENA|MKGO01003017|MKGO01003017.1	100	29	0	0	2	30	51487	51515	7.09e-06	54.7	ENA|MKGO01003017|MKGO01003017.1	29	29	29	0	100	1	1	GCAGATATACATTTGTCAAGCAATAGGAG	GCAGATATACATTTGTCAAGCAATAGGAG	69	81768	ENA|MKGO01003017|MKGO01003017.1 Triticum urartu cultivar G1812 TuUngrouped_contig_3265, whole genome shotgun sequence.
SNP_1033285	ENA|MKGO01000007|MKGO01000007.1	95.652	69	3	0	1	69	600990076	600990144	4.15e-23	111	ENA|MKGO01000007|MKGO01000007.1	60	66	66	0	95.65	1	1	TGCAGATATACATTTGTCAAGCAATAGGAGTCGGCGTACCCATGTGTCTTGAGACTCCACATGATGTAA	TGCAGATATACATTTGTCAAGCAATAGGAGCCGGCGTACCCATGTGTCTTGAGACTCCACACAATGTAA	69	719689837	ENA|MKGO01000007|MKGO01000007.1 Triticum urartu cultivar G1812 chromosome 7, whole genome shotgun sequence.
SNP_1033285	ENA|MKGO01000007|MKGO01000007.1	95.455	66	2	1	5	69	295902572	295902637	6.94e-21	104	ENA|MKGO01000007|MKGO01000007.1	56	63	63	1	95.45	1	1	GAT-ATACATTTGTCAAGCAATAGGAGTCGGCGTACCCATGTGTCTTGAGACTCCACATGATGTAA	GATAATACATTTGTCAAACAATAGGAGCCGGCGTACCCATGTGTCTTGAGACTCCACATGATGTAA	69	719689837	ENA|MKGO01000007|MKGO01000007.1 Triticum urartu cultivar G1812 chromosome 7, whole genome shotgun sequence.
SNP_1033285	ENA|MKGO01000004|MKGO01000004.1	95.455	66	2	1	5	69	503790295	503790230	6.94e-21	104	ENA|MKGO01000004|MKGO01000004.1	56	63	63	1	95.45	1	-1	GAT-ATACATTTGTCAAGCAATAGGAGTCGGCGTACCCATGTGTCTTGAGACTCCACATGATGTAA	GATAATACATTTGTCAAACAATAGGAGCCGGCGTACCCATGTGTCTTGAGACTCCACATGATGTAA	69	619584425	ENA|MKGO01000004|MKGO01000004.1 Triticum urartu cultivar G1812 chromosome 4, whole genome shotgun sequence.
SNP_1033630	ENA|MKGO01000005|MKGO01000005.1	100	69	0	0	1	69	490461366	490461434	4.12e-28	128	ENA|MKGO01000005|MKGO01000005.1	69	69	69	0	100	1	1	TGCAGAATGTGCGAATGATCTTCTCTATTTTGGGGGCACAAGACAATGCATAGCTTCATAGTCTTCTGT	TGCAGAATGTGCGAATGATCTTCTCTATTTTGGGGGCACAAGACAATGCATAGCTTCATAGTCTTCTGT	69	661480603	ENA|MKGO01000005|MKGO01000005.1 Triticum urartu cultivar G1812 chromosome 5, whole genome shotgun sequence.
SNP_1034271	ENA|MKGO01000001|MKGO01000001.1	100	50	0	0	1	50	546064127	546064176	1.5e-17	93.5	ENA|MKGO01000001|MKGO01000001.1	50	50	50	0	100	1	1	TGCAGGAACAAGCAACGCGCACCCAGGTCACCAACCAGATCCACTCCCCG	TGCAGGAACAAGCAACGCGCACCCAGGTCACCAACCAGATCCACTCCCCG	69	584211917	ENA|MKGO01000001|MKGO01000001.1 Triticum urartu cultivar G1812 chromosome 1, whole genome shotgun sequence.
SNP_1034635	ENA|MKGO01000007|MKGO01000007.1	100	69	0	0	1	69	394369303	394369371	4.12e-28	128	ENA|MKGO01000007|MKGO01000007.1	69	69	69	0	100	1	1	TGCAGTATGAAAAGATAAATTATCAAATTGGTATAGAAAACACTTGCTCTTTACATTCTAGCAACCACT	TGCAGTATGAAAAGATAAATTATCAAATTGGTATAGAAAACACTTGCTCTTTACATTCTAGCAACCACT	69	719689837	ENA|MKGO01000007|MKGO01000007.1 Triticum urartu cultivar G1812 chromosome 7, whole genome shotgun sequence.
SNP_1036575	ENA|MKGO01000005|MKGO01000005.1	100	54	0	0	1	54	223941379	223941432	8.98e-20	100	ENA|MKGO01000005|MKGO01000005.1	54	54	54	0	100	1	1	TGCAGAATTGCGTGAGAGGGAAAGCATGGAATATGAAAGAAGACATAGGGACCG	TGCAGAATTGCGTGAGAGGGAAAGCATGGAATATGAAAGAAGACATAGGGACCG	69	661480603	ENA|MKGO01000005|MKGO01000005.1 Triticum urartu cultivar G1812 chromosome 5, whole genome shotgun sequence.
SNP_1038477	ENA|MKGO01000005|MKGO01000005.1	100	69	0	0	1	69	536191962	536192030	4.12e-28	128	ENA|MKGO01000005|MKGO01000005.1	69	69	69	0	100	1	1	TGCAGTGACATTCTGCTCCTGTGACAGGATCCAACCTTCTCGGCACCATGCATCCTGTCATTCCCAAGA	TGCAGTGACATTCTGCTCCTGTGACAGGATCCAACCTTCTCGGCACCATGCATCCTGTCATTCCCAAGA	69	661480603	ENA|MKGO01000005|MKGO01000005.1 Triticum urartu cultivar G1812 chromosome 5, whole genome shotgun sequence.
SNP_1038581	ENA|MKGO01000006|MKGO01000006.1	100	54	0	0	1	54	465979226	465979279	8.98e-20	100	ENA|MKGO01000006|MKGO01000006.1	54	54	54	0	100	1	1	TGCAGCTGGGCGCCTGGCCGCTCTACTGGGTCGTGCAGGGCTGCGTCATGACCG	TGCAGCTGGGCGCCTGGCCGCTCTACTGGGTCGTGCAGGGCTGCGTCATGACCG	69	575865107	ENA|MKGO01000006|MKGO01000006.1 Triticum urartu cultivar G1812 chromosome 6, whole genome shotgun sequence.
SNP_1038581	ENA|MKGO01000006|MKGO01000006.1	100	54	0	0	1	54	477064148	477064201	8.98e-20	100	ENA|MKGO01000006|MKGO01000006.1	54	54	54	0	100	1	1	TGCAGCTGGGCGCCTGGCCGCTCTACTGGGTCGTGCAGGGCTGCGTCATGACCG	TGCAGCTGGGCGCCTGGCCGCTCTACTGGGTCGTGCAGGGCTGCGTCATGACCG	69	575865107	ENA|MKGO01000006|MKGO01000006.1 Triticum urartu cultivar G1812 chromosome 6, whole genome shotgun sequence.
SNP_1038581	ENA|MKGO01000006|MKGO01000006.1	100	54	0	0	1	54	477089606	477089659	8.98e-20	100	ENA|MKGO01000006|MKGO01000006.1	54	54	54	0	100	1	1	TGCAGCTGGGCGCCTGGCCGCTCTACTGGGTCGTGCAGGGCTGCGTCATGACCG	TGCAGCTGGGCGCCTGGCCGCTCTACTGGGTCGTGCAGGGCTGCGTCATGACCG	69	575865107	ENA|MKGO01000006|MKGO01000006.1 Triticum urartu cultivar G1812 chromosome 6, whole genome shotgun sequence.
SNP_1038581	ENA|MKGO01000006|MKGO01000006.1	94.231	52	3	0	3	54	477699795	477699744	1.17e-13	80.5	ENA|MKGO01000006|MKGO01000006.1	43	49	49	0	94.23	1	-1	CAGCTGGGCGCCTGGCCGCTCTACTGGGTCGTGCAGGGCTGCGTCATGACCG	CAGCTGGGCGCCTGGCCGCTCTACTGGGCCACGCAGGGCTGCGTCATGACCG	69	575865107	ENA|MKGO01000006|MKGO01000006.1 Triticum urartu cultivar G1812 chromosome 6, whole genome shotgun sequence.
SNP_1038581	ENA|MKGO01000006|MKGO01000006.1	93.75	48	3	0	3	50	477937594	477937547	1.96e-11	73.1	ENA|MKGO01000006|MKGO01000006.1	39	45	45	0	93.75	1	-1	CAGCTGGGCGCCTGGCCGCTCTACTGGGTCGTGCAGGGCTGCGTCATG	CAGCTGGGCGCCTGGCCGCTCTACTGGGTGGCCCAGGGCTGCGTCATG	69	575865107	ENA|MKGO01000006|MKGO01000006.1 Triticum urartu cultivar G1812 chromosome 6, whole genome shotgun sequence.
SNP_1038581	ENA|MKGO01000452|MKGO01000452.1	94.737	57	3	0	3	59	9598	9542	1.94e-16	89.8	ENA|MKGO01000452|MKGO01000452.1	48	54	54	0	94.74	1	-1	CAGCTGGGCGCCTGGCCGCTCTACTGGGTCGTGCAGGGCTGCGTCATGACCGAGATC	CAGCTGGGCGCCTGTCCGCTCTACTGGGTCGTGCAGGGCTGCGTCATGAACGACATC	69	57278	ENA|MKGO01000452|MKGO01000452.1 Triticum urartu cultivar G1812 TuUngrouped_contig_562, whole genome shotgun sequence.
SNP_1038581	ENA|MKGO01000279|MKGO01000279.1	94.737	57	3	0	3	59	39754	39698	1.94e-16	89.8	ENA|MKGO01000279|MKGO01000279.1	48	54	54	0	94.74	1	-1	CAGCTGGGCGCCTGGCCGCTCTACTGGGTCGTGCAGGGCTGCGTCATGACCGAGATC	CAGCTGGGCGCCTGTCCGCTCTACTGGGTCGTGCAGGGCTGCGTCATGAACGACATC	69	92723	ENA|MKGO01000279|MKGO01000279.1 Triticum urartu cultivar G1812 TuUngrouped_contig_346, whole genome shotgun sequence.
SNP_1038581	ENA|MKGO01000001|MKGO01000001.1	94.737	57	3	0	3	59	321477581	321477637	1.94e-16	89.8	ENA|MKGO01000001|MKGO01000001.1	48	54	54	0	94.74	1	1	CAGCTGGGCGCCTGGCCGCTCTACTGGGTCGTGCAGGGCTGCGTCATGACCGAGATC	CAGCTGGGCGCCTGTCCGCTCTACTGGGTCGTGCAGGGCTGCGTCATGAACGACATC	69	584211917	ENA|MKGO01000001|MKGO01000001.1 Triticum urartu cultivar G1812 chromosome 1, whole genome shotgun sequence.
SNP_1038581	ENA|MKGO01000001|MKGO01000001.1	94.737	57	3	0	3	59	321640353	321640409	1.94e-16	89.8	ENA|MKGO01000001|MKGO01000001.1	48	54	54	0	94.74	1	1	CAGCTGGGCGCCTGGCCGCTCTACTGGGTCGTGCAGGGCTGCGTCATGACCGAGATC	CAGCTGGGCGCCTGTCCGCTCTACTGGGTCGTGCAGGGCTGCGTCATGAACGACATC	69	584211917	ENA|MKGO01000001|MKGO01000001.1 Triticum urartu cultivar G1812 chromosome 1, whole genome shotgun sequence.
SNP_1038581	ENA|MKGO01000001|MKGO01000001.1	94.737	57	3	0	3	59	321813631	321813687	1.94e-16	89.8	ENA|MKGO01000001|MKGO01000001.1	48	54	54	0	94.74	1	1	CAGCTGGGCGCCTGGCCGCTCTACTGGGTCGTGCAGGGCTGCGTCATGACCGAGATC	CAGCTGGGCGCCTGTCCGCTCTACTGGGTCGTGCAGGGCTGCGTCATGAACGACATC	69	584211917	ENA|MKGO01000001|MKGO01000001.1 Triticum urartu cultivar G1812 chromosome 1, whole genome shotgun sequence.
SNP_1038581	ENA|MKGO01000002|MKGO01000002.1	97.959	49	1	0	3	51	295194930	295194882	2.52e-15	86.1	ENA|MKGO01000002|MKGO01000002.1	46	48	48	0	97.96	1	-1	CAGCTGGGCGCCTGGCCGCTCTACTGGGTCGTGCAGGGCTGCGTCATGA	CAGCTGGGCACCTGGCCGCTCTACTGGGTCGTGCAGGGCTGCGTCATGA	69	753719114	ENA|MKGO01000002|MKGO01000002.1 Triticum urartu cultivar G1812 chromosome 2, whole genome shotgun sequence.
SNP_1038990	ENA|MKGO01000003|MKGO01000003.1	98.571	70	0	1	1	69	9225103	9225172	1.92e-26	122	ENA|MKGO01000003|MKGO01000003.1	66	69	69	1	98.57	1	1	TGCAGATTTTATTGTAACAACAGTACGGGTGCATAG-AAAAAAATCCTAGCTACATCCGCAGCCTAATTA	TGCAGATTTTATTGTAACAACAGTACGGGTGCATAGAAAAAAAATCCTAGCTACATCCGCAGCCTAATTA	69	747046674	ENA|MKGO01000003|MKGO01000003.1 Triticum urartu cultivar G1812 chromosome 3, whole genome shotgun sequence.
SNP_1039007	ENA|MKGO01000002|MKGO01000002.1	98.551	69	1	0	1	69	568100082	568100150	1.92e-26	122	ENA|MKGO01000002|MKGO01000002.1	66	68	68	0	98.55	1	1	TGCAGAAATGCTTTGGCTAGCAATACCAAAACTACAATTTGTTTATGGCTAAAACGCACATCAGAGGAG	TGCAGAAATGCTTGGGCTAGCAATACCAAAACTACAATTTGTTTATGGCTAAAACGCACATCAGAGGAG	69	753719114	ENA|MKGO01000002|MKGO01000002.1 Triticum urartu cultivar G1812 chromosome 2, whole genome shotgun sequence.
SNP_1040078	ENA|MKGO01000005|MKGO01000005.1	100	69	0	0	1	69	409366552	409366484	4.12e-28	128	ENA|MKGO01000005|MKGO01000005.1	69	69	69	0	100	1	-1	TGCAGGGCAGGACATTTTTCTGTTCCAAAACAAAGCTAGGGGCATTTTATCAGGGATCAAACGGGCAGT	TGCAGGGCAGGACATTTTTCTGTTCCAAAACAAAGCTAGGGGCATTTTATCAGGGATCAAACGGGCAGT	69	661480603	ENA|MKGO01000005|MKGO01000005.1 Triticum urartu cultivar G1812 chromosome 5, whole genome shotgun sequence.
SNP_1040098	ENA|MKGO01000005|MKGO01000005.1	100	69	0	0	1	69	539136844	539136776	4.12e-28	128	ENA|MKGO01000005|MKGO01000005.1	69	69	69	0	100	1	-1	TGCAGGAGGATCATTGGTTGCTTGGAGCAGCCGACCAAGTTGGACAAGTGGGTCATCAACCTGCCGTCC	TGCAGGAGGATCATTGGTTGCTTGGAGCAGCCGACCAAGTTGGACAAGTGGGTCATCAACCTGCCGTCC	69	661480603	ENA|MKGO01000005|MKGO01000005.1 Triticum urartu cultivar G1812 chromosome 5, whole genome shotgun sequence.
SNP_1042992	ENA|MKGO01002418|MKGO01002418.1	100	69	0	0	1	69	75612	75680	4.12e-28	128	ENA|MKGO01002418|MKGO01002418.1	69	69	69	0	100	1	1	TGCAGTAACTATAGGGTCCAATTATCTTCTTGAGCTATAGTATTTCTCATAAACCATGATCTCTTGCAA	TGCAGTAACTATAGGGTCCAATTATCTTCTTGAGCTATAGTATTTCTCATAAACCATGATCTCTTGCAA	69	76069	ENA|MKGO01002418|MKGO01002418.1 Triticum urartu cultivar G1812 TuUngrouped_contig_2648, whole genome shotgun sequence.
SNP_1042992	ENA|MKGO01000004|MKGO01000004.1	100	69	0	0	1	69	606597025	606596957	4.12e-28	128	ENA|MKGO01000004|MKGO01000004.1	69	69	69	0	100	1	-1	TGCAGTAACTATAGGGTCCAATTATCTTCTTGAGCTATAGTATTTCTCATAAACCATGATCTCTTGCAA	TGCAGTAACTATAGGGTCCAATTATCTTCTTGAGCTATAGTATTTCTCATAAACCATGATCTCTTGCAA	69	619584425	ENA|MKGO01000004|MKGO01000004.1 Triticum urartu cultivar G1812 chromosome 4, whole genome shotgun sequence.
SNP_1042992	ENA|MKGO01000001|MKGO01000001.1	100	69	0	0	1	69	487339487	487339555	4.12e-28	128	ENA|MKGO01000001|MKGO01000001.1	69	69	69	0	100	1	1	TGCAGTAACTATAGGGTCCAATTATCTTCTTGAGCTATAGTATTTCTCATAAACCATGATCTCTTGCAA	TGCAGTAACTATAGGGTCCAATTATCTTCTTGAGCTATAGTATTTCTCATAAACCATGATCTCTTGCAA	69	584211917	ENA|MKGO01000001|MKGO01000001.1 Triticum urartu cultivar G1812 chromosome 1, whole genome shotgun sequence.
SNP_1042992	ENA|MKGO01000001|MKGO01000001.1	100	69	0	0	1	69	487414270	487414338	4.12e-28	128	ENA|MKGO01000001|MKGO01000001.1	69	69	69	0	100	1	1	TGCAGTAACTATAGGGTCCAATTATCTTCTTGAGCTATAGTATTTCTCATAAACCATGATCTCTTGCAA	TGCAGTAACTATAGGGTCCAATTATCTTCTTGAGCTATAGTATTTCTCATAAACCATGATCTCTTGCAA	69	584211917	ENA|MKGO01000001|MKGO01000001.1 Triticum urartu cultivar G1812 chromosome 1, whole genome shotgun sequence.
SNP_1043132	ENA|MKGO01007882|MKGO01007882.1	100	69	0	0	1	69	409	341	4.12e-28	128	ENA|MKGO01007882|MKGO01007882.1	69	69	69	0	100	1	-1	TGCAGAGATGACACGTGGGAAAGATGCAACCTTTTGAGCCGGCAAGGCGATGCCTCGCCCAGACCTATG	TGCAGAGATGACACGTGGGAAAGATGCAACCTTTTGAGCCGGCAAGGCGATGCCTCGCCCAGACCTATG	69	8038	ENA|MKGO01007882|MKGO01007882.1 Triticum urartu cultivar G1812 TuUngrouped_contig_8181, whole genome shotgun sequence.
SNP_1043336	ENA|MKGO01000001|MKGO01000001.1	100	69	0	0	1	69	2965764	2965832	4.12e-28	128	ENA|MKGO01000001|MKGO01000001.1	69	69	69	0	100	1	1	TGCAGCTATAGTGGTTGGATTTGGATACTTGCAGGGGAGGAAAGAAGGGAGATGGGAGATTGGGAGGGC	TGCAGCTATAGTGGTTGGATTTGGATACTTGCAGGGGAGGAAAGAAGGGAGATGGGAGATTGGGAGGGC	69	584211917	ENA|MKGO01000001|MKGO01000001.1 Triticum urartu cultivar G1812 chromosome 1, whole genome shotgun sequence.
SNP_1045450	ENA|MKGO01000002|MKGO01000002.1	100	69	0	0	1	69	119942653	119942585	4.12e-28	128	ENA|MKGO01000002|MKGO01000002.1	69	69	69	0	100	1	-1	TGCAGCTCTTCAGACGTGAACTTGGGCTCAGAGACTCTTTCCTGCTGTCCAAGGACAGCCTAGGAAGCT	TGCAGCTCTTCAGACGTGAACTTGGGCTCAGAGACTCTTTCCTGCTGTCCAAGGACAGCCTAGGAAGCT	69	753719114	ENA|MKGO01000002|MKGO01000002.1 Triticum urartu cultivar G1812 chromosome 2, whole genome shotgun sequence.
SNP_1045450	ENA|MKGO01000002|MKGO01000002.1	100	69	0	0	1	69	122114439	122114507	4.12e-28	128	ENA|MKGO01000002|MKGO01000002.1	69	69	69	0	100	1	1	TGCAGCTCTTCAGACGTGAACTTGGGCTCAGAGACTCTTTCCTGCTGTCCAAGGACAGCCTAGGAAGCT	TGCAGCTCTTCAGACGTGAACTTGGGCTCAGAGACTCTTTCCTGCTGTCCAAGGACAGCCTAGGAAGCT	69	753719114	ENA|MKGO01000002|MKGO01000002.1 Triticum urartu cultivar G1812 chromosome 2, whole genome shotgun sequence.
SNP_1045543	ENA|MKGO01000001|MKGO01000001.1	100	69	0	0	1	69	548124222	548124290	4.12e-28	128	ENA|MKGO01000001|MKGO01000001.1	69	69	69	0	100	1	1	TGCAGACACGTCGTTGTCGCCCTATCCCTTGGGCTAGCTCGTTTTCCTTTGCTGTGGTCCGCAGGCCAG	TGCAGACACGTCGTTGTCGCCCTATCCCTTGGGCTAGCTCGTTTTCCTTTGCTGTGGTCCGCAGGCCAG	69	584211917	ENA|MKGO01000001|MKGO01000001.1 Triticum urartu cultivar G1812 chromosome 1, whole genome shotgun sequence.
SNP_1045828	ENA|MKGO01000004|MKGO01000004.1	100	69	0	0	1	69	28711393	28711325	4.12e-28	128	ENA|MKGO01000004|MKGO01000004.1	69	69	69	0	100	1	-1	TGCAGGTTTCAGTTGCCACCTTCTCAACACTAGTACTAGCTAGAAACGGCCGTTGTCCCCTTGCCAGGC	TGCAGGTTTCAGTTGCCACCTTCTCAACACTAGTACTAGCTAGAAACGGCCGTTGTCCCCTTGCCAGGC	69	619584425	ENA|MKGO01000004|MKGO01000004.1 Triticum urartu cultivar G1812 chromosome 4, whole genome shotgun sequence.
SNP_1045828	ENA|MKGO01000003|MKGO01000003.1	100	69	0	0	1	69	303323831	303323899	4.12e-28	128	ENA|MKGO01000003|MKGO01000003.1	69	69	69	0	100	1	1	TGCAGGTTTCAGTTGCCACCTTCTCAACACTAGTACTAGCTAGAAACGGCCGTTGTCCCCTTGCCAGGC	TGCAGGTTTCAGTTGCCACCTTCTCAACACTAGTACTAGCTAGAAACGGCCGTTGTCCCCTTGCCAGGC	69	747046674	ENA|MKGO01000003|MKGO01000003.1 Triticum urartu cultivar G1812 chromosome 3, whole genome shotgun sequence.
SNP_1045828	ENA|MKGO01009327|MKGO01009327.1	92.424	66	1	1	1	62	10800	10735	5.41e-17	91.6	ENA|MKGO01009327|MKGO01009327.1	49	61	61	4	92.42	1	-1	TGCAGGTTTCAGTTGCCACCTTCTCAACACTAG----TACTAGCTAGAAACGGCCGTTGTCCCCTT	TGCAGGTTTCTGTTGCCACCTTCTCAACACTAGCTAGTACTAGCTAGAAACGGCCGTTGTCCCCTT	69	15690	ENA|MKGO01009327|MKGO01009327.1 Triticum urartu cultivar G1812 TuUngrouped_contig_9635, whole genome shotgun sequence.
SNP_1046089	ENA|MKGO01006045|MKGO01006045.1	92.754	69	5	0	1	69	10357	10289	8.98e-20	100	ENA|MKGO01006045|MKGO01006045.1	54	64	64	0	92.75	1	-1	TGCAGATACGTACTGGTCGTTGAGGCGTTGCATGGCGAGGATTGACATGTCGTCCTGGCCGCTGGGATG	TGCAGGGACATACTGGTCGTTGAGGCGTTGCATGGCGAGGATTGACATGTCATCCTGGCCGCTGAGATG	69	25622	ENA|MKGO01006045|MKGO01006045.1 Triticum urartu cultivar G1812 TuUngrouped_contig_6337, whole genome shotgun sequence.
SNP_1046089	ENA|MKGO01000007|MKGO01000007.1	88.525	61	7	0	4	64	697610311	697610371	5.45e-12	75	ENA|MKGO01000007|MKGO01000007.1	40	54	54	0	88.52	1	1	AGATACGTACTGGTCGTTGAGGCGTTGCATGGCGAGGATTGACATGTCGTCCTGGCCGCTG	AGATACGTACTGGTCGTTGAGGCGTTGCATGGCCATGACAGACATGTCCTGTTGGCCGCTG	69	719689837	ENA|MKGO01000007|MKGO01000007.1 Triticum urartu cultivar G1812 chromosome 7, whole genome shotgun sequence.
SNP_1046089	ENA|MKGO01000007|MKGO01000007.1	88.525	61	7	0	4	64	697727756	697727816	5.45e-12	75	ENA|MKGO01000007|MKGO01000007.1	40	54	54	0	88.52	1	1	AGATACGTACTGGTCGTTGAGGCGTTGCATGGCGAGGATTGACATGTCGTCCTGGCCGCTG	AGATACGTACTGGTCGTTGAGGCGTTGCATGGCCATGACAGACATGTCCTGTTGGCCGCTG	69	719689837	ENA|MKGO01000007|MKGO01000007.1 Triticum urartu cultivar G1812 chromosome 7, whole genome shotgun sequence.
SNP_1046121	ENA|MKGO01000003|MKGO01000003.1	100	69	0	0	1	69	49465925	49465993	4.12e-28	128	ENA|MKGO01000003|MKGO01000003.1	69	69	69	0	100	1	1	TGCAGACCATCAATAACAACGAGACAATTGTTTTGACGGAGGATTTTACAGCACCCTTGAATTGGGTCT	TGCAGACCATCAATAACAACGAGACAATTGTTTTGACGGAGGATTTTACAGCACCCTTGAATTGGGTCT	69	747046674	ENA|MKGO01000003|MKGO01000003.1 Triticum urartu cultivar G1812 chromosome 3, whole genome shotgun sequence.
SNP_1048579	ENA|MKGO01000006|MKGO01000006.1	100	69	0	0	1	69	144207039	144207107	4.12e-28	128	ENA|MKGO01000006|MKGO01000006.1	69	69	69	0	100	1	1	TGCAGCCCATGATCAATGCGGCAGCATCGTTTGGAGATCCAGAACTGCTCGGCGACATACAGATCGGCC	TGCAGCCCATGATCAATGCGGCAGCATCGTTTGGAGATCCAGAACTGCTCGGCGACATACAGATCGGCC	69	575865107	ENA|MKGO01000006|MKGO01000006.1 Triticum urartu cultivar G1812 chromosome 6, whole genome shotgun sequence.
SNP_1049074	ENA|MKGO01004425|MKGO01004425.1	100	54	0	0	1	54	224	171	8.98e-20	100	ENA|MKGO01004425|MKGO01004425.1	54	54	54	0	100	1	-1	TGCAGTACGTGTTCCTCAAGTGGGCGCTGGCGTTCCTGGTGGGGCTCCTCACCG	TGCAGTACGTGTTCCTCAAGTGGGCGCTGGCGTTCCTGGTGGGGCTCCTCACCG	69	8630	ENA|MKGO01004425|MKGO01004425.1 Triticum urartu cultivar G1812 TuUngrouped_contig_4716, whole genome shotgun sequence.
SNP_1049074	ENA|MKGO01000006|MKGO01000006.1	100	54	0	0	1	54	63075230	63075283	8.98e-20	100	ENA|MKGO01000006|MKGO01000006.1	54	54	54	0	100	1	1	TGCAGTACGTGTTCCTCAAGTGGGCGCTGGCGTTCCTGGTGGGGCTCCTCACCG	TGCAGTACGTGTTCCTCAAGTGGGCGCTGGCGTTCCTGGTGGGGCTCCTCACCG	69	575865107	ENA|MKGO01000006|MKGO01000006.1 Triticum urartu cultivar G1812 chromosome 6, whole genome shotgun sequence.
SNP_1049074	ENA|MKGO01000006|MKGO01000006.1	94.444	54	3	0	1	54	60568714	60568661	9.05e-15	84.2	ENA|MKGO01000006|MKGO01000006.1	45	51	51	0	94.44	1	-1	TGCAGTACGTGTTCCTCAAGTGGGCGCTGGCGTTCCTGGTGGGGCTCCTCACCG	TGCAGTACATCTTCCTCAAGTGGTCGCTGGCGTTCCTGGTGGGGCTCCTCACCG	69	575865107	ENA|MKGO01000006|MKGO01000006.1 Triticum urartu cultivar G1812 chromosome 6, whole genome shotgun sequence.
SNP_1049252	ENA|MKGO01000003|MKGO01000003.1	96.552	58	1	1	13	69	726923542	726923485	4.18e-18	95.3	ENA|MKGO01000003|MKGO01000003.1	51	56	56	1	96.55	1	-1	CGCGACTCATCCAAGCCGATCCACTCCTTCCCACCGTGGCTCCTCCCCACGCCG-AGA	CGCGACTCATCCAAGCCGATCCACTCCTTCCCACCGTGGCTCCTCGCCACGCCGGAGA	69	747046674	ENA|MKGO01000003|MKGO01000003.1 Triticum urartu cultivar G1812 chromosome 3, whole genome shotgun sequence.
SNP_1049252	ENA|MKGO01000003|MKGO01000003.1	96.552	58	1	1	13	69	736459924	736459867	4.18e-18	95.3	ENA|MKGO01000003|MKGO01000003.1	51	56	56	1	96.55	1	-1	CGCGACTCATCCAAGCCGATCCACTCCTTCCCACCGTGGCTCCTCCCCACGCCG-AGA	CGCGACTCATCCAAGCCGATCCACTCCTTCCCACCGTGGCTCCTCGCCACGCCGGAGA	69	747046674	ENA|MKGO01000003|MKGO01000003.1 Triticum urartu cultivar G1812 chromosome 3, whole genome shotgun sequence.
SNP_1050727	ENA|MKGO01000002|MKGO01000002.1	100	69	0	0	1	69	593743295	593743227	4.12e-28	128	ENA|MKGO01000002|MKGO01000002.1	69	69	69	0	100	1	-1	TGCAGGAACGTCATCTTCTCCAGGAACCCGAGCTCCGCCGTGGCCAGCGTGAGCACGTAGACGAAGAGC	TGCAGGAACGTCATCTTCTCCAGGAACCCGAGCTCCGCCGTGGCCAGCGTGAGCACGTAGACGAAGAGC	69	753719114	ENA|MKGO01000002|MKGO01000002.1 Triticum urartu cultivar G1812 chromosome 2, whole genome shotgun sequence.
SNP_1051309	ENA|MKGO01000002|MKGO01000002.1	100	69	0	0	1	69	208299883	208299951	4.12e-28	128	ENA|MKGO01000002|MKGO01000002.1	69	69	69	0	100	1	1	TGCAGCGTGCTGCTCGCCCTCATCCTCGTCCTCGCCATCGTCTTCGTCGCGCTCTACTTCACCGTGTTC	TGCAGCGTGCTGCTCGCCCTCATCCTCGTCCTCGCCATCGTCTTCGTCGCGCTCTACTTCACCGTGTTC	69	753719114	ENA|MKGO01000002|MKGO01000002.1 Triticum urartu cultivar G1812 chromosome 2, whole genome shotgun sequence.
SNP_1051411	ENA|MKGO01000007|MKGO01000007.1	100	69	0	0	1	69	616185866	616185934	4.12e-28	128	ENA|MKGO01000007|MKGO01000007.1	69	69	69	0	100	1	1	TGCAGGGTTAATGCATCAGAGCCAAAATTGCCTGCTGACATGATTTTCATCCTTACATGGACAAGATCA	TGCAGGGTTAATGCATCAGAGCCAAAATTGCCTGCTGACATGATTTTCATCCTTACATGGACAAGATCA	69	719689837	ENA|MKGO01000007|MKGO01000007.1 Triticum urartu cultivar G1812 chromosome 7, whole genome shotgun sequence.
SNP_1051411	ENA|MKGO01000007|MKGO01000007.1	100	69	0	0	1	69	651791638	651791570	4.12e-28	128	ENA|MKGO01000007|MKGO01000007.1	69	69	69	0	100	1	-1	TGCAGGGTTAATGCATCAGAGCCAAAATTGCCTGCTGACATGATTTTCATCCTTACATGGACAAGATCA	TGCAGGGTTAATGCATCAGAGCCAAAATTGCCTGCTGACATGATTTTCATCCTTACATGGACAAGATCA	69	719689837	ENA|MKGO01000007|MKGO01000007.1 Triticum urartu cultivar G1812 chromosome 7, whole genome shotgun sequence.
SNP_1051411	ENA|MKGO01000007|MKGO01000007.1	96.97	33	1	0	37	69	651835715	651835683	1.97e-06	56.5	ENA|MKGO01000007|MKGO01000007.1	30	32	32	0	96.97	1	-1	GACATGATTTTCATCCTTACATGGACAAGATCA	GACATGATTTTCATCCTTACATGGACAAAATCA	69	719689837	ENA|MKGO01000007|MKGO01000007.1 Triticum urartu cultivar G1812 chromosome 7, whole genome shotgun sequence.
SNP_1051411	ENA|MKGO01003562|MKGO01003562.1	96.97	33	1	0	37	69	23464	23432	1.97e-06	56.5	ENA|MKGO01003562|MKGO01003562.1	30	32	32	0	96.97	1	-1	GACATGATTTTCATCCTTACATGGACAAGATCA	GACATGATTTTCATCCTTACATGGACAAAATCA	69	85550	ENA|MKGO01003562|MKGO01003562.1 Triticum urartu cultivar G1812 TuUngrouped_contig_3836, whole genome shotgun sequence.
SNP_1051411	ENA|MKGO01000100|MKGO01000100.1	96.97	33	1	0	37	69	15861	15829	1.97e-06	56.5	ENA|MKGO01000100|MKGO01000100.1	30	32	32	0	96.97	1	-1	GACATGATTTTCATCCTTACATGGACAAGATCA	GACATGATTTTCATCCTTACATGGACAAAATCA	69	28160	ENA|MKGO01000100|MKGO01000100.1 Triticum urartu cultivar G1812 TuUngrouped_contig_121, whole genome shotgun sequence.
SNP_1051596	ENA|MKGO01000001|MKGO01000001.1	100	69	0	0	1	69	561043605	561043673	4.12e-28	128	ENA|MKGO01000001|MKGO01000001.1	69	69	69	0	100	1	1	TGCAGTACCAGGACTTCGCCAACCGCTACCAGCTCTGCCTCTCCCACCTCGCCGACGCCGCGCGCGAGG	TGCAGTACCAGGACTTCGCCAACCGCTACCAGCTCTGCCTCTCCCACCTCGCCGACGCCGCGCGCGAGG	69	584211917	ENA|MKGO01000001|MKGO01000001.1 Triticum urartu cultivar G1812 chromosome 1, whole genome shotgun sequence.
SNP_1052066	ENA|MKGO01000002|MKGO01000002.1	98.551	69	1	0	1	69	748414198	748414130	1.92e-26	122	ENA|MKGO01000002|MKGO01000002.1	66	68	68	0	98.55	1	-1	TGCAGGCTTTGTATCCAACTTCAGTGTGGATCCACCATTACTACCTGCTCAATGCTTTCAACCAATATC	TGCAGGCTTTGTATCCAACTTCAGTGTGGATCCACCATTACTACCCGCTCAATGCTTTCAACCAATATC	69	753719114	ENA|MKGO01000002|MKGO01000002.1 Triticum urartu cultivar G1812 chromosome 2, whole genome shotgun sequence.
SNP_1052648	ENA|MKGO01000005|MKGO01000005.1	98.551	69	1	0	1	69	280784407	280784339	1.92e-26	122	ENA|MKGO01000005|MKGO01000005.1	66	68	68	0	98.55	1	-1	TGCAGCAGGCTCACGAGCTCCTCCTCCGACTGTGACGAAACCATACAAAGGTACAGTTTGCAACAGAAG	TGCAGCAGGCTCACGAGCTCCTCCTCCGACTGTGACGAAACCATACAAAGGCACAGTTTGCAACAGAAG	69	661480603	ENA|MKGO01000005|MKGO01000005.1 Triticum urartu cultivar G1812 chromosome 5, whole genome shotgun sequence.
SNP_1052826	ENA|MKGO01000005|MKGO01000005.1	98.551	69	1	0	1	69	560494109	560494041	1.92e-26	122	ENA|MKGO01000005|MKGO01000005.1	66	68	68	0	98.55	1	-1	TGCAGCTACGTCAAGGATTACGAATTTGTTGCCATCTTTGACGCTGACTTCCAGCCAAACCCCGACTTT	TGCAGCTACGTCAAGGATTACGAATTTGTTGCCATCTTTGACGCTGACTTCCAGCCAAACACCGACTTT	69	661480603	ENA|MKGO01000005|MKGO01000005.1 Triticum urartu cultivar G1812 chromosome 5, whole genome shotgun sequence.
SNP_1052892	ENA|MKGO01000005|MKGO01000005.1	98.551	69	1	0	1	69	469545589	469545657	1.92e-26	122	ENA|MKGO01000005|MKGO01000005.1	66	68	68	0	98.55	1	1	TGCAGTTTTCATGTGTAATTTGCTACCGTGGCCTGACGTACGTGCGGCGGTATTGTTGTGTTTGTTTAT	TGCAGTTTTCATGTCTAATTTGCTACCGTGGCCTGACGTACGTGCGGCGGTATTGTTGTGTTTGTTTAT	69	661480603	ENA|MKGO01000005|MKGO01000005.1 Triticum urartu cultivar G1812 chromosome 5, whole genome shotgun sequence.
SNP_1052892	ENA|MKGO01000005|MKGO01000005.1	98.551	69	1	0	1	69	469640346	469640414	1.92e-26	122	ENA|MKGO01000005|MKGO01000005.1	66	68	68	0	98.55	1	1	TGCAGTTTTCATGTGTAATTTGCTACCGTGGCCTGACGTACGTGCGGCGGTATTGTTGTGTTTGTTTAT	TGCAGTTTTCATGTCTAATTTGCTACCGTGGCCTGACGTACGTGCGGCGGTATTGTTGTGTTTGTTTAT	69	661480603	ENA|MKGO01000005|MKGO01000005.1 Triticum urartu cultivar G1812 chromosome 5, whole genome shotgun sequence.
SNP_1053100	ENA|MKGO01000005|MKGO01000005.1	100	69	0	0	1	69	575652465	575652397	4.12e-28	128	ENA|MKGO01000005|MKGO01000005.1	69	69	69	0	100	1	-1	TGCAGCAGATGCTCAATTCAAATCGCCCCGGGATTAACTACTACAAGTTGCTCGTGAAGGAAACGGAGG	TGCAGCAGATGCTCAATTCAAATCGCCCCGGGATTAACTACTACAAGTTGCTCGTGAAGGAAACGGAGG	69	661480603	ENA|MKGO01000005|MKGO01000005.1 Triticum urartu cultivar G1812 chromosome 5, whole genome shotgun sequence.
SNP_1053893	ENA|MKGO01000005|MKGO01000005.1	100	57	0	0	1	57	588166502	588166446	1.93e-21	106	ENA|MKGO01000005|MKGO01000005.1	57	57	57	0	100	1	-1	TGCAGGTTCTGCCACACCACCGTCCACAGCACCGCGATGATGCTGAGCACCACCCCG	TGCAGGTTCTGCCACACCACCGTCCACAGCACCGCGATGATGCTGAGCACCACCCCG	69	661480603	ENA|MKGO01000005|MKGO01000005.1 Triticum urartu cultivar G1812 chromosome 5, whole genome shotgun sequence.
SNP_1053994	ENA|MKGO01000003|MKGO01000003.1	100	69	0	0	1	69	468420486	468420418	4.12e-28	128	ENA|MKGO01000003|MKGO01000003.1	69	69	69	0	100	1	-1	TGCAGCTGTCCAGCACAAGCTTACCGCTTACATAACCGTCAGAAAGCGACCATTTAGGCCCGTCAGGAC	TGCAGCTGTCCAGCACAAGCTTACCGCTTACATAACCGTCAGAAAGCGACCATTTAGGCCCGTCAGGAC	69	747046674	ENA|MKGO01000003|MKGO01000003.1 Triticum urartu cultivar G1812 chromosome 3, whole genome shotgun sequence.
SNP_1054075	ENA|MKGO01000004|MKGO01000004.1	100	69	0	0	1	69	555742690	555742622	4.12e-28	128	ENA|MKGO01000004|MKGO01000004.1	69	69	69	0	100	1	-1	TGCAGCGGGGCAACGCCGTGGTGGTCATGTCGGGGTTCGCCATGGACTCCGTGATGAGGGCCGTGCAGC	TGCAGCGGGGCAACGCCGTGGTGGTCATGTCGGGGTTCGCCATGGACTCCGTGATGAGGGCCGTGCAGC	69	619584425	ENA|MKGO01000004|MKGO01000004.1 Triticum urartu cultivar G1812 chromosome 4, whole genome shotgun sequence.
SNP_1054186	ENA|MKGO01000006|MKGO01000006.1	100	69	0	0	1	69	518852807	518852875	4.12e-28	128	ENA|MKGO01000006|MKGO01000006.1	69	69	69	0	100	1	1	TGCAGCCAGCCCACGCTGGTCGGCTACTCCCTCTGCGAGCACCACCTCGGCAAGGGCCGCGGGCAGCGG	TGCAGCCAGCCCACGCTGGTCGGCTACTCCCTCTGCGAGCACCACCTCGGCAAGGGCCGCGGGCAGCGG	69	575865107	ENA|MKGO01000006|MKGO01000006.1 Triticum urartu cultivar G1812 chromosome 6, whole genome shotgun sequence.
SNP_1054186	ENA|MKGO01000007|MKGO01000007.1	96.61	59	2	0	1	59	122129861	122129919	3.23e-19	99	ENA|MKGO01000007|MKGO01000007.1	53	57	57	0	96.61	1	1	TGCAGCCAGCCCACGCTGGTCGGCTACTCCCTCTGCGAGCACCACCTCGGCAAGGGCCG	TGCAGCCAGCCGACGCTGGTCGGCTACTCCCTCTGCGAGCACCACCTGGGCAAGGGCCG	69	719689837	ENA|MKGO01000007|MKGO01000007.1 Triticum urartu cultivar G1812 chromosome 7, whole genome shotgun sequence.
SNP_1054203	ENA|MKGO01000002|MKGO01000002.1	100	54	0	0	1	54	711034920	711034973	8.98e-20	100	ENA|MKGO01000002|MKGO01000002.1	54	54	54	0	100	1	1	TGCAGAGCATGTGATTGATACACTGTAGTAGTAGAAGAAGAAATAAAAGAACCG	TGCAGAGCATGTGATTGATACACTGTAGTAGTAGAAGAAGAAATAAAAGAACCG	69	753719114	ENA|MKGO01000002|MKGO01000002.1 Triticum urartu cultivar G1812 chromosome 2, whole genome shotgun sequence.
SNP_1055151	ENA|MKGO01000002|MKGO01000002.1	98.551	69	1	0	1	69	749723308	749723376	1.92e-26	122	ENA|MKGO01000002|MKGO01000002.1	66	68	68	0	98.55	1	1	TGCAGCATGCATGCACTCAATCTGTGCATTGTAGGACGTGACCATGATCCATGAATCGTGCTGGTCTTC	TGTAGCATGCATGCACTCAATCTGTGCATTGTAGGACGTGACCATGATCCATGAATCGTGCTGGTCTTC	69	753719114	ENA|MKGO01000002|MKGO01000002.1 Triticum urartu cultivar G1812 chromosome 2, whole genome shotgun sequence.
SNP_1055357	ENA|MKGO01000002|MKGO01000002.1	100	69	0	0	1	69	597198721	597198789	4.12e-28	128	ENA|MKGO01000002|MKGO01000002.1	69	69	69	0	100	1	1	TGCAGTGTTTCAGACAACGGTCCACTGACTGACCCATCTAACCATTTTTTAGTCTGCTAATAGCTTCAG	TGCAGTGTTTCAGACAACGGTCCACTGACTGACCCATCTAACCATTTTTTAGTCTGCTAATAGCTTCAG	69	753719114	ENA|MKGO01000002|MKGO01000002.1 Triticum urartu cultivar G1812 chromosome 2, whole genome shotgun sequence.
SNP_1055635	ENA|MKGO01000007|MKGO01000007.1	100	69	0	0	1	69	699056527	699056595	4.12e-28	128	ENA|MKGO01000007|MKGO01000007.1	69	69	69	0	100	1	1	TGCAGCCTCTCGCCGGCGCTTGGCGATGGCACGCTCATGCTTGTGCGCGTTCTGGTGGCCGCCGAGTGC	TGCAGCCTCTCGCCGGCGCTTGGCGATGGCACGCTCATGCTTGTGCGCGTTCTGGTGGCCGCCGAGTGC	69	719689837	ENA|MKGO01000007|MKGO01000007.1 Triticum urartu cultivar G1812 chromosome 7, whole genome shotgun sequence.
SNP_1055635	ENA|MKGO01000007|MKGO01000007.1	88.462	52	6	0	15	66	699228036	699228087	1.18e-08	63.9	ENA|MKGO01000007|MKGO01000007.1	34	46	46	0	88.46	1	1	GGCGCTTGGCGATGGCACGCTCATGCTTGTGCGCGTTCTGGTGGCCGCCGAG	GGAGCCTGGCAACGGCGCGCTCTTGCTTGTGCGCGTTCTGGTGGCCGCCGAG	69	719689837	ENA|MKGO01000007|MKGO01000007.1 Triticum urartu cultivar G1812 chromosome 7, whole genome shotgun sequence.
SNP_1055635	ENA|MKGO01000005|MKGO01000005.1	89.062	64	4	3	7	69	414402745	414402684	1.51e-12	76.8	ENA|MKGO01000005|MKGO01000005.1	41	57	57	3	89.06	1	-1	CTCTCGCCGGCGCTTGGCGATGGCA-CGCTCATGCTTGTGCGCGTTCTGGTGGCCGCCGAGTGC	CTCCCGCC-GCGCTTGGCGA-CGCAGCGCTCGTGCTTGTGCGCGTTCTGGTGGCCGCCGAGCGC	69	661480603	ENA|MKGO01000005|MKGO01000005.1 Triticum urartu cultivar G1812 chromosome 5, whole genome shotgun sequence.
SNP_1055635	ENA|MKGO01000005|MKGO01000005.1	89.831	59	6	0	11	69	616549690	616549632	1.51e-12	76.8	ENA|MKGO01000005|MKGO01000005.1	41	53	53	0	89.83	1	-1	CGCCGGCGCTTGGCGATGGCACGCTCATGCTTGTGCGCGTTCTGGTGGCCGCCGAGTGC	CGCCGGCGCTTGGCGACGCTGCGCTCGTGCTTGTGCGCGTTCTGGTGGCCGCCGAGCGC	69	661480603	ENA|MKGO01000005|MKGO01000005.1 Triticum urartu cultivar G1812 chromosome 5, whole genome shotgun sequence.
SNP_1055635	ENA|MKGO01000005|MKGO01000005.1	88.136	59	7	0	11	69	616733466	616733408	7.04e-11	71.3	ENA|MKGO01000005|MKGO01000005.1	38	52	52	0	88.14	1	-1	CGCCGGCGCTTGGCGATGGCACGCTCATGCTTGTGCGCGTTCTGGTGGCCGCCGAGTGC	CGCTGGCGCTTGGCGACGCTGCGCTCTTGCTTGTGCGCGTTCTGGTGGCCGCCGAGCGC	69	661480603	ENA|MKGO01000005|MKGO01000005.1 Triticum urartu cultivar G1812 chromosome 5, whole genome shotgun sequence.
SNP_1055635	ENA|MKGO01000005|MKGO01000005.1	90.196	51	5	0	16	66	530803883	530803933	9.11e-10	67.6	ENA|MKGO01000005|MKGO01000005.1	36	46	46	0	90.2	1	1	GCGCTTGGCGATGGCACGCTCATGCTTGTGCGCGTTCTGGTGGCCGCCGAG	GCGCTTGGCGAGGGTGCGCTCCAGCTTGTGCGCGTTCTGGTGGCCGCCGAG	69	661480603	ENA|MKGO01000005|MKGO01000005.1 Triticum urartu cultivar G1812 chromosome 5, whole genome shotgun sequence.
SNP_1055635	ENA|MKGO01000005|MKGO01000005.1	88.235	51	6	0	16	66	530796350	530796400	4.24e-08	62.1	ENA|MKGO01000005|MKGO01000005.1	33	45	45	0	88.24	1	1	GCGCTTGGCGATGGCACGCTCATGCTTGTGCGCGTTCTGGTGGCCGCCGAG	GCGCTTGGCAAGGGTGCGCTCGAGCTTGTGCGCGTTCTGGTGGCCGCCGAG	69	661480603	ENA|MKGO01000005|MKGO01000005.1 Triticum urartu cultivar G1812 chromosome 5, whole genome shotgun sequence.
SNP_1055635	ENA|MKGO01000004|MKGO01000004.1	86.538	52	3	3	17	66	501726264	501726313	7.09e-06	54.7	ENA|MKGO01000004|MKGO01000004.1	29	45	45	4	86.54	1	1	CGCTTGGCGATG--GCACGCTCATGCTTGTGCGCGTTCTGGTGGCCGCCGAG	CGCTTCGCG-TGCTGC-CGCTCGCGCTTGTGCGCGTTCTGGTGGCCGCCGAG	69	619584425	ENA|MKGO01000004|MKGO01000004.1 Triticum urartu cultivar G1812 chromosome 4, whole genome shotgun sequence.
SNP_1055635	ENA|MKGO01000004|MKGO01000004.1	86.538	52	3	3	17	66	501927847	501927896	7.09e-06	54.7	ENA|MKGO01000004|MKGO01000004.1	29	45	45	4	86.54	1	1	CGCTTGGCGATG--GCACGCTCATGCTTGTGCGCGTTCTGGTGGCCGCCGAG	CGCTTCGCG-TGCTGC-CGCTCGCGCTTGTGCGCGTTCTGGTGGCCGCCGAG	69	619584425	ENA|MKGO01000004|MKGO01000004.1 Triticum urartu cultivar G1812 chromosome 4, whole genome shotgun sequence.
SNP_1056226	ENA|MKGO01000002|MKGO01000002.1	100	69	0	0	1	69	37113287	37113219	4.12e-28	128	ENA|MKGO01000002|MKGO01000002.1	69	69	69	0	100	1	-1	TGCAGCGCTAAATAGGAAATGCCCAGGAATTGGTTGTGTTTTTGAAACTTGGATCCCGCACATTTTTTG	TGCAGCGCTAAATAGGAAATGCCCAGGAATTGGTTGTGTTTTTGAAACTTGGATCCCGCACATTTTTTG	69	753719114	ENA|MKGO01000002|MKGO01000002.1 Triticum urartu cultivar G1812 chromosome 2, whole genome shotgun sequence.
SNP_1056585	ENA|MKGO01000007|MKGO01000007.1	98.551	69	1	0	1	69	667949001	667948933	1.92e-26	122	ENA|MKGO01000007|MKGO01000007.1	66	68	68	0	98.55	1	-1	TGCAGTACCAGACGAGAAAAAAGCATGCTTTCATTGATATATGCACAATGAGCACAACAGAGTATGAAA	TGCAGTACCAGACGAGTAAAAAGCATGCTTTCATTGATATATGCACAATGAGCACAACAGAGTATGAAA	69	719689837	ENA|MKGO01000007|MKGO01000007.1 Triticum urartu cultivar G1812 chromosome 7, whole genome shotgun sequence.
SNP_1056740	ENA|MKGO01000005|MKGO01000005.1	100	54	0	0	1	54	633290902	633290955	8.98e-20	100	ENA|MKGO01000005|MKGO01000005.1	54	54	54	0	100	1	1	TGCAGCTCCCACGGCTTCTTCCAGGTTAGTCCATCCCAATTCCCATTCCCTCCG	TGCAGCTCCCACGGCTTCTTCCAGGTTAGTCCATCCCAATTCCCATTCCCTCCG	69	661480603	ENA|MKGO01000005|MKGO01000005.1 Triticum urartu cultivar G1812 chromosome 5, whole genome shotgun sequence.
SNP_1056740	ENA|MKGO01000005|MKGO01000005.1	90.385	52	1	1	1	52	661344107	661344060	3.28e-09	65.8	ENA|MKGO01000005|MKGO01000005.1	35	47	47	4	90.38	1	-1	TGCAGCTCCCACGGCTTCTTCCAGGTTAGTCCATCCCAATTCCCATTCCCTC	TGCAGCTCCCACGGCTTCTTCCAGGTTAGTCC----CAATTCCCATTCCGTC	69	661480603	ENA|MKGO01000005|MKGO01000005.1 Triticum urartu cultivar G1812 chromosome 5, whole genome shotgun sequence.
SNP_1057469	ENA|MKGO01000003|MKGO01000003.1	100	69	0	0	1	69	474919499	474919431	4.12e-28	128	ENA|MKGO01000003|MKGO01000003.1	69	69	69	0	100	1	-1	TGCAGATGAAATGTCTCAGCGTGCGGGCATGGTCCAGAGCAGTTGCCAACGTACCGAACTAGTCCCAGC	TGCAGATGAAATGTCTCAGCGTGCGGGCATGGTCCAGAGCAGTTGCCAACGTACCGAACTAGTCCCAGC	69	747046674	ENA|MKGO01000003|MKGO01000003.1 Triticum urartu cultivar G1812 chromosome 3, whole genome shotgun sequence.
SNP_1057738	ENA|MKGO01000007|MKGO01000007.1	100	69	0	0	1	69	50330867	50330799	4.12e-28	128	ENA|MKGO01000007|MKGO01000007.1	69	69	69	0	100	1	-1	TGCAGCTGCTCACGGGGCGGACGTCGCCGCTCGGGCTCGCCCACGCCGTGGAGACCGCACTGGAGGAAG	TGCAGCTGCTCACGGGGCGGACGTCGCCGCTCGGGCTCGCCCACGCCGTGGAGACCGCACTGGAGGAAG	69	719689837	ENA|MKGO01000007|MKGO01000007.1 Triticum urartu cultivar G1812 chromosome 7, whole genome shotgun sequence.
SNP_1058565	ENA|MKGO01000002|MKGO01000002.1	100	54	0	0	1	54	431572832	431572779	8.98e-20	100	ENA|MKGO01000002|MKGO01000002.1	54	54	54	0	100	1	-1	TGCAGCTCTAGTAATAAGGTGGTGCTGGGGGAAGGCACCATGACCTACTTTCCG	TGCAGCTCTAGTAATAAGGTGGTGCTGGGGGAAGGCACCATGACCTACTTTCCG	69	753719114	ENA|MKGO01000002|MKGO01000002.1 Triticum urartu cultivar G1812 chromosome 2, whole genome shotgun sequence.
SNP_1058958	ENA|MKGO01000002|MKGO01000002.1	100	63	0	0	7	69	734811596	734811534	8.92e-25	117	ENA|MKGO01000002|MKGO01000002.1	63	63	63	0	100	1	-1	GATAGGACTATTTTGTGTCCAAGTTGTTGCTCCACTTGTGCACGCGTTTCAAGTCCAACGGAA	GATAGGACTATTTTGTGTCCAAGTTGTTGCTCCACTTGTGCACGCGTTTCAAGTCCAACGGAA	69	753719114	ENA|MKGO01000002|MKGO01000002.1 Triticum urartu cultivar G1812 chromosome 2, whole genome shotgun sequence.
SNP_1060942	ENA|MKGO01000005|MKGO01000005.1	100	69	0	0	1	69	244767900	244767832	4.12e-28	128	ENA|MKGO01000005|MKGO01000005.1	69	69	69	0	100	1	-1	TGCAGTTGATAAACAAGGGAGGAGAGACAGGCAAGCACTCATCAATGACCTAGTTTGATGCATGTGTGC	TGCAGTTGATAAACAAGGGAGGAGAGACAGGCAAGCACTCATCAATGACCTAGTTTGATGCATGTGTGC	69	661480603	ENA|MKGO01000005|MKGO01000005.1 Triticum urartu cultivar G1812 chromosome 5, whole genome shotgun sequence.
SNP_1060942	ENA|MKGO01000005|MKGO01000005.1	100	69	0	0	1	69	244827859	244827791	4.12e-28	128	ENA|MKGO01000005|MKGO01000005.1	69	69	69	0	100	1	-1	TGCAGTTGATAAACAAGGGAGGAGAGACAGGCAAGCACTCATCAATGACCTAGTTTGATGCATGTGTGC	TGCAGTTGATAAACAAGGGAGGAGAGACAGGCAAGCACTCATCAATGACCTAGTTTGATGCATGTGTGC	69	661480603	ENA|MKGO01000005|MKGO01000005.1 Triticum urartu cultivar G1812 chromosome 5, whole genome shotgun sequence.
SNP_1061058	ENA|MKGO01000005|MKGO01000005.1	100	69	0	0	1	69	418579285	418579217	4.12e-28	128	ENA|MKGO01000005|MKGO01000005.1	69	69	69	0	100	1	-1	TGCAGTAGCTAGCCATGGAAGAAATAGACTTAGGGCAAGAATCTCTAAACGTAGCATGGTCCATATACG	TGCAGTAGCTAGCCATGGAAGAAATAGACTTAGGGCAAGAATCTCTAAACGTAGCATGGTCCATATACG	69	661480603	ENA|MKGO01000005|MKGO01000005.1 Triticum urartu cultivar G1812 chromosome 5, whole genome shotgun sequence.
SNP_1062728	ENA|MKGO01000003|MKGO01000003.1	100	59	0	0	1	59	594098577	594098519	1.49e-22	110	ENA|MKGO01000003|MKGO01000003.1	59	59	59	0	100	1	-1	TGCAGGGTGCTTTAACTGCATGAGTTCAAAATATTGGCGCATGCCAAGCGCAGCTGCCG	TGCAGGGTGCTTTAACTGCATGAGTTCAAAATATTGGCGCATGCCAAGCGCAGCTGCCG	69	747046674	ENA|MKGO01000003|MKGO01000003.1 Triticum urartu cultivar G1812 chromosome 3, whole genome shotgun sequence.
SNP_1064182	ENA|MKGO01000005|MKGO01000005.1	100	69	0	0	1	69	576749417	576749485	4.12e-28	128	ENA|MKGO01000005|MKGO01000005.1	69	69	69	0	100	1	1	TGCAGTACGTAGAATAGAACGCACTTGCGCAGTCCGTGGACAAATTAAGGTGGAGAAGGCGACCATGCA	TGCAGTACGTAGAATAGAACGCACTTGCGCAGTCCGTGGACAAATTAAGGTGGAGAAGGCGACCATGCA	69	661480603	ENA|MKGO01000005|MKGO01000005.1 Triticum urartu cultivar G1812 chromosome 5, whole genome shotgun sequence.
SNP_1064182	ENA|MKGO01000005|MKGO01000005.1	100	69	0	0	1	69	576800032	576800100	4.12e-28	128	ENA|MKGO01000005|MKGO01000005.1	69	69	69	0	100	1	1	TGCAGTACGTAGAATAGAACGCACTTGCGCAGTCCGTGGACAAATTAAGGTGGAGAAGGCGACCATGCA	TGCAGTACGTAGAATAGAACGCACTTGCGCAGTCCGTGGACAAATTAAGGTGGAGAAGGCGACCATGCA	69	661480603	ENA|MKGO01000005|MKGO01000005.1 Triticum urartu cultivar G1812 chromosome 5, whole genome shotgun sequence.
SNP_1064939	ENA|MKGO01000002|MKGO01000002.1	97.101	69	2	0	1	69	43573743	43573675	8.92e-25	117	ENA|MKGO01000002|MKGO01000002.1	63	67	67	0	97.1	1	-1	TGCAGTCCTTCCAGGTGGCAAGGGTGTGTCGCCATATATTCTGGCTGTTCATGCTGCCGCGTGCAATCA	TGCAGCCCTTTCAGGTGGCAAGGGTGTGTCGCCATATATTCTGGCTGTTCATGCTGCCGCGTGCAATCA	69	753719114	ENA|MKGO01000002|MKGO01000002.1 Triticum urartu cultivar G1812 chromosome 2, whole genome shotgun sequence.
SNP_1065552	ENA|MKGO01000001|MKGO01000001.1	100	69	0	0	1	69	252875227	252875295	4.12e-28	128	ENA|MKGO01000001|MKGO01000001.1	69	69	69	0	100	1	1	TGCAGAGATTTGTCCAATTTTTATGATCCCTTACCTTTCTTTCGTAGCATTCTCGGTACTAATTTGATC	TGCAGAGATTTGTCCAATTTTTATGATCCCTTACCTTTCTTTCGTAGCATTCTCGGTACTAATTTGATC	69	584211917	ENA|MKGO01000001|MKGO01000001.1 Triticum urartu cultivar G1812 chromosome 1, whole genome shotgun sequence.
SNP_1065958	ENA|MKGO01000001|MKGO01000001.1	98.529	68	1	0	2	69	508201819	508201752	6.9e-26	121	ENA|MKGO01000001|MKGO01000001.1	65	67	67	0	98.53	1	-1	GCAGGCTGTTCATTTCCCTCCTCTCCCTGGCGAGGCCGCTCCAGTTCTGGGCTTTTGCATACATGCTG	GCAGGCTGTTCATTTCCCTCCTCTCCCTGGCGAGGCCGCTCCAGTTCTGGGCTTTTGCGTACATGCTG	69	584211917	ENA|MKGO01000001|MKGO01000001.1 Triticum urartu cultivar G1812 chromosome 1, whole genome shotgun sequence.
SNP_1067301	ENA|MKGO01000002|MKGO01000002.1	100	68	0	0	1	68	545000504	545000437	1.48e-27	126	ENA|MKGO01000002|MKGO01000002.1	68	68	68	0	100	1	-1	TGCAGAGCGTGTACGTGGAGCACGAGGTGGAGGCGCTGATCCAGGTGGCGCTGCTGTGCACGCAGGGG	TGCAGAGCGTGTACGTGGAGCACGAGGTGGAGGCGCTGATCCAGGTGGCGCTGCTGTGCACGCAGGGG	69	753719114	ENA|MKGO01000002|MKGO01000002.1 Triticum urartu cultivar G1812 chromosome 2, whole genome shotgun sequence.
SNP_1067432	ENA|MKGO01000006|MKGO01000006.1	100	69	0	0	1	69	31236390	31236458	4.12e-28	128	ENA|MKGO01000006|MKGO01000006.1	69	69	69	0	100	1	1	TGCAGTTATGCCCTTGTTCATTTAACGTGTATTGCCTCTCATCTATATGCTCTTTGTAAATGTTTTATT	TGCAGTTATGCCCTTGTTCATTTAACGTGTATTGCCTCTCATCTATATGCTCTTTGTAAATGTTTTATT	69	575865107	ENA|MKGO01000006|MKGO01000006.1 Triticum urartu cultivar G1812 chromosome 6, whole genome shotgun sequence.
SNP_1067593	ENA|MKGO01000006|MKGO01000006.1	100	69	0	0	1	69	424781945	424782013	4.12e-28	128	ENA|MKGO01000006|MKGO01000006.1	69	69	69	0	100	1	1	TGCAGTACAAATTGTTTCAGTGGATGTAACCTATTTTGAATGGTGAATGCAGCGGCGACACGGACTCGG	TGCAGTACAAATTGTTTCAGTGGATGTAACCTATTTTGAATGGTGAATGCAGCGGCGACACGGACTCGG	69	575865107	ENA|MKGO01000006|MKGO01000006.1 Triticum urartu cultivar G1812 chromosome 6, whole genome shotgun sequence.
SNP_1067593	ENA|MKGO01000006|MKGO01000006.1	100	69	0	0	1	69	542828587	542828519	4.12e-28	128	ENA|MKGO01000006|MKGO01000006.1	69	69	69	0	100	1	-1	TGCAGTACAAATTGTTTCAGTGGATGTAACCTATTTTGAATGGTGAATGCAGCGGCGACACGGACTCGG	TGCAGTACAAATTGTTTCAGTGGATGTAACCTATTTTGAATGGTGAATGCAGCGGCGACACGGACTCGG	69	575865107	ENA|MKGO01000006|MKGO01000006.1 Triticum urartu cultivar G1812 chromosome 6, whole genome shotgun sequence.
SNP_1067795	ENA|MKGO01000001|MKGO01000001.1	95.652	69	3	0	1	69	27212404	27212336	4.15e-23	111	ENA|MKGO01000001|MKGO01000001.1	60	66	66	0	95.65	1	-1	TGCAGGCACCAGTTCGTATCATCCTGGTGCTGTGTATGGTTAATCTGATGGCAACAGTCGTGATCATCA	TGCAGGCACCGGTTCGTATCATCCTGGTGCTGTGTATGGTTAATCTGATGGCAACATTCATGATCATCA	69	584211917	ENA|MKGO01000001|MKGO01000001.1 Triticum urartu cultivar G1812 chromosome 1, whole genome shotgun sequence.
SNP_1068528	ENA|MKGO01000006|MKGO01000006.1	100	69	0	0	1	69	92742348	92742280	4.12e-28	128	ENA|MKGO01000006|MKGO01000006.1	69	69	69	0	100	1	-1	TGCAGTATAGTAACCTCAAAATTTTCAACATGCGCGGCTCAAAATTCAGATATAGTAAGTATGCCCACA	TGCAGTATAGTAACCTCAAAATTTTCAACATGCGCGGCTCAAAATTCAGATATAGTAAGTATGCCCACA	69	575865107	ENA|MKGO01000006|MKGO01000006.1 Triticum urartu cultivar G1812 chromosome 6, whole genome shotgun sequence.
SNP_1069239	ENA|MKGO01000001|MKGO01000001.1	97.101	69	2	0	1	69	561070672	561070740	8.92e-25	117	ENA|MKGO01000001|MKGO01000001.1	63	67	67	0	97.1	1	1	TGCAGACCAGCAGCAACGTGCCGCTTGATTCTAGCAGGTATCGCGACGAGTGTTTGAGGACCCCGTGGG	TGCAGACCAGCAGCAACGTGCCGCTTGATTCTAGCAGATATTGCGACGAGTGTTTGAGGACCCCGTGGG	69	584211917	ENA|MKGO01000001|MKGO01000001.1 Triticum urartu cultivar G1812 chromosome 1, whole genome shotgun sequence.
SNP_1069354	ENA|MKGO01000003|MKGO01000003.1	98.551	69	1	0	1	69	49473757	49473825	1.92e-26	122	ENA|MKGO01000003|MKGO01000003.1	66	68	68	0	98.55	1	1	TGCAGTTTATATGTACCTTTGGGAAAAAGGCATAAAGACCTCGGTCATGAGACAAGTGTATAAGTTGGG	TGCAGTTTATATGTACCTTTGGGAAAAAGGCATAAAGACCTCCGTCATGAGACAAGTGTATAAGTTGGG	69	747046674	ENA|MKGO01000003|MKGO01000003.1 Triticum urartu cultivar G1812 chromosome 3, whole genome shotgun sequence.
SNP_1070325	ENA|MKGO01000007|MKGO01000007.1	100	69	0	0	1	69	440297266	440297198	4.12e-28	128	ENA|MKGO01000007|MKGO01000007.1	69	69	69	0	100	1	-1	TGCAGTTTTGGCCTCTGAGGCTCTGATCCACCTCGTCTGAGAGCCGTCTCGGTTTGGACACGAGGCCAA	TGCAGTTTTGGCCTCTGAGGCTCTGATCCACCTCGTCTGAGAGCCGTCTCGGTTTGGACACGAGGCCAA	69	719689837	ENA|MKGO01000007|MKGO01000007.1 Triticum urartu cultivar G1812 chromosome 7, whole genome shotgun sequence.
SNP_1070954	ENA|MKGO01006346|MKGO01006346.1	100	69	0	0	1	69	5747	5679	4.12e-28	128	ENA|MKGO01006346|MKGO01006346.1	69	69	69	0	100	1	-1	TGCAGCGTGAAGCTGGAGTCAAAAGGCTGGACGGATAACTAGAGCTGGGATAGTCTGTTAGTTAGTTAG	TGCAGCGTGAAGCTGGAGTCAAAAGGCTGGACGGATAACTAGAGCTGGGATAGTCTGTTAGTTAGTTAG	69	13021	ENA|MKGO01006346|MKGO01006346.1 Triticum urartu cultivar G1812 TuUngrouped_contig_6638, whole genome shotgun sequence.
SNP_1071071	ENA|MKGO01000002|MKGO01000002.1	100	69	0	0	1	69	527331686	527331754	4.12e-28	128	ENA|MKGO01000002|MKGO01000002.1	69	69	69	0	100	1	1	TGCAGCATCCGTTGATGTGCCATGTGGTGATGGGTTCTCTTGTGGTGTCGGACGATCGTCTTTGCAGCG	TGCAGCATCCGTTGATGTGCCATGTGGTGATGGGTTCTCTTGTGGTGTCGGACGATCGTCTTTGCAGCG	69	753719114	ENA|MKGO01000002|MKGO01000002.1 Triticum urartu cultivar G1812 chromosome 2, whole genome shotgun sequence.
SNP_1071071	ENA|MKGO01000002|MKGO01000002.1	100	69	0	0	1	69	527456724	527456656	4.12e-28	128	ENA|MKGO01000002|MKGO01000002.1	69	69	69	0	100	1	-1	TGCAGCATCCGTTGATGTGCCATGTGGTGATGGGTTCTCTTGTGGTGTCGGACGATCGTCTTTGCAGCG	TGCAGCATCCGTTGATGTGCCATGTGGTGATGGGTTCTCTTGTGGTGTCGGACGATCGTCTTTGCAGCG	69	753719114	ENA|MKGO01000002|MKGO01000002.1 Triticum urartu cultivar G1812 chromosome 2, whole genome shotgun sequence.
SNP_1071268	ENA|MKGO01000006|MKGO01000006.1	100	69	0	0	1	69	514465674	514465606	4.12e-28	128	ENA|MKGO01000006|MKGO01000006.1	69	69	69	0	100	1	-1	TGCAGGCCAGATTGGATCTAACCTACTACTACTGTGCTCATGGACCGCTGGCGATGGCGGGGACAAAGG	TGCAGGCCAGATTGGATCTAACCTACTACTACTGTGCTCATGGACCGCTGGCGATGGCGGGGACAAAGG	69	575865107	ENA|MKGO01000006|MKGO01000006.1 Triticum urartu cultivar G1812 chromosome 6, whole genome shotgun sequence.
SNP_1072151	ENA|MKGO01000002|MKGO01000002.1	100	55	0	0	1	55	81611899	81611845	2.5e-20	102	ENA|MKGO01000002|MKGO01000002.1	55	55	55	0	100	1	-1	TGCAGCAAGCATACCAAAAAGAGCATGCATTTTCTGAATCAGAAGATAATCACCG	TGCAGCAAGCATACCAAAAAGAGCATGCATTTTCTGAATCAGAAGATAATCACCG	69	753719114	ENA|MKGO01000002|MKGO01000002.1 Triticum urartu cultivar G1812 chromosome 2, whole genome shotgun sequence.
SNP_1072906	ENA|MKGO01000001|MKGO01000001.1	100	69	0	0	1	69	58568077	58568145	4.12e-28	128	ENA|MKGO01000001|MKGO01000001.1	69	69	69	0	100	1	1	TGCAGGAGCTATAGCTCTTCTATCTAAGCTTTCTTTCTGCTCATGGGGAATGGGAGATCATGGCATGTG	TGCAGGAGCTATAGCTCTTCTATCTAAGCTTTCTTTCTGCTCATGGGGAATGGGAGATCATGGCATGTG	69	584211917	ENA|MKGO01000001|MKGO01000001.1 Triticum urartu cultivar G1812 chromosome 1, whole genome shotgun sequence.
SNP_1073174	ENA|MKGO01010142|MKGO01010142.1	100	69	0	0	1	69	9046	9114	4.12e-28	128	ENA|MKGO01010142|MKGO01010142.1	69	69	69	0	100	1	1	TGCAGCATGTGCACTCCAACGACTTCCATGCAGTTATGCTAGGTGCAAGTGTTTCACCAAACTGTAGCT	TGCAGCATGTGCACTCCAACGACTTCCATGCAGTTATGCTAGGTGCAAGTGTTTCACCAAACTGTAGCT	69	13194	ENA|MKGO01010142|MKGO01010142.1 Triticum urartu cultivar G1812 TuUngrouped_contig_10451, whole genome shotgun sequence.
SNP_1073174	ENA|MKGO01000002|MKGO01000002.1	100	69	0	0	1	69	45265549	45265617	4.12e-28	128	ENA|MKGO01000002|MKGO01000002.1	69	69	69	0	100	1	1	TGCAGCATGTGCACTCCAACGACTTCCATGCAGTTATGCTAGGTGCAAGTGTTTCACCAAACTGTAGCT	TGCAGCATGTGCACTCCAACGACTTCCATGCAGTTATGCTAGGTGCAAGTGTTTCACCAAACTGTAGCT	69	753719114	ENA|MKGO01000002|MKGO01000002.1 Triticum urartu cultivar G1812 chromosome 2, whole genome shotgun sequence.
SNP_1074082	ENA|MKGO01000005|MKGO01000005.1	100	69	0	0	1	69	614241569	614241501	4.12e-28	128	ENA|MKGO01000005|MKGO01000005.1	69	69	69	0	100	1	-1	TGCAGGAGATGACAAAACTCAAAGACGCAAGCACGATGCCTGACCCAAAACCTCAAGACGCTAGTAGCA	TGCAGGAGATGACAAAACTCAAAGACGCAAGCACGATGCCTGACCCAAAACCTCAAGACGCTAGTAGCA	69	661480603	ENA|MKGO01000005|MKGO01000005.1 Triticum urartu cultivar G1812 chromosome 5, whole genome shotgun sequence.
SNP_1074082	ENA|MKGO01000005|MKGO01000005.1	98.551	69	1	0	1	69	659260334	659260266	1.92e-26	122	ENA|MKGO01000005|MKGO01000005.1	66	68	68	0	98.55	1	-1	TGCAGGAGATGACAAAACTCAAAGACGCAAGCACGATGCCTGACCCAAAACCTCAAGACGCTAGTAGCA	TGCAGGAGATGACAAAACTCAAAGACGCAAGCACAATGCCTGACCCAAAACCTCAAGACGCTAGTAGCA	69	661480603	ENA|MKGO01000005|MKGO01000005.1 Triticum urartu cultivar G1812 chromosome 5, whole genome shotgun sequence.
SNP_1074086	ENA|MKGO01000004|MKGO01000004.1	100	69	0	0	1	69	31385634	31385566	4.12e-28	128	ENA|MKGO01000004|MKGO01000004.1	69	69	69	0	100	1	-1	TGCAGGAGAGGGCTAGCTGCGGGAGAGGGCGAAGGCCTTGACATGCATGACATGGATCTCTCTCTAAGC	TGCAGGAGAGGGCTAGCTGCGGGAGAGGGCGAAGGCCTTGACATGCATGACATGGATCTCTCTCTAAGC	69	619584425	ENA|MKGO01000004|MKGO01000004.1 Triticum urartu cultivar G1812 chromosome 4, whole genome shotgun sequence.
SNP_1074472	ENA|MKGO01000005|MKGO01000005.1	100	69	0	0	1	69	583373859	583373927	4.12e-28	128	ENA|MKGO01000005|MKGO01000005.1	69	69	69	0	100	1	1	TGCAGATTGGTCTTCCCAGTACTGAATCTGTAGATACTGTTGCAAGCATATGGTATAACCCTGGTGCAG	TGCAGATTGGTCTTCCCAGTACTGAATCTGTAGATACTGTTGCAAGCATATGGTATAACCCTGGTGCAG	69	661480603	ENA|MKGO01000005|MKGO01000005.1 Triticum urartu cultivar G1812 chromosome 5, whole genome shotgun sequence.
SNP_1075301	ENA|MKGO01000002|MKGO01000002.1	100	69	0	0	1	69	737780905	737780837	4.12e-28	128	ENA|MKGO01000002|MKGO01000002.1	69	69	69	0	100	1	-1	TGCAGGAACGAAGATGCCTTACTTTTGAGTGGATTCCTCTGAAGCAAAATGCACGCACTCATTAGTGCT	TGCAGGAACGAAGATGCCTTACTTTTGAGTGGATTCCTCTGAAGCAAAATGCACGCACTCATTAGTGCT	69	753719114	ENA|MKGO01000002|MKGO01000002.1 Triticum urartu cultivar G1812 chromosome 2, whole genome shotgun sequence.
SNP_1075301	ENA|MKGO01000002|MKGO01000002.1	100	69	0	0	1	69	737825123	737825055	4.12e-28	128	ENA|MKGO01000002|MKGO01000002.1	69	69	69	0	100	1	-1	TGCAGGAACGAAGATGCCTTACTTTTGAGTGGATTCCTCTGAAGCAAAATGCACGCACTCATTAGTGCT	TGCAGGAACGAAGATGCCTTACTTTTGAGTGGATTCCTCTGAAGCAAAATGCACGCACTCATTAGTGCT	69	753719114	ENA|MKGO01000002|MKGO01000002.1 Triticum urartu cultivar G1812 chromosome 2, whole genome shotgun sequence.
SNP_1075419	ENA|MKGO01006407|MKGO01006407.1	100	69	0	0	1	69	25699	25767	4.12e-28	128	ENA|MKGO01006407|MKGO01006407.1	69	69	69	0	100	1	1	TGCAGCGTATTCATGCCGTCTCTGCCTTTTGGAACAGTGCCCTGGCACACGTCTGGACGTCATTAAATA	TGCAGCGTATTCATGCCGTCTCTGCCTTTTGGAACAGTGCCCTGGCACACGTCTGGACGTCATTAAATA	69	26206	ENA|MKGO01006407|MKGO01006407.1 Triticum urartu cultivar G1812 TuUngrouped_contig_6699, whole genome shotgun sequence.
SNP_1075476	ENA|MKGO01000002|MKGO01000002.1	100	69	0	0	1	69	632419806	632419874	4.12e-28	128	ENA|MKGO01000002|MKGO01000002.1	69	69	69	0	100	1	1	TGCAGCCTAGGGGAGATGAGTTGGAACATGTCTAAAAAGGCAAAGCGGGAACCGAGGTGCTGATCTTAC	TGCAGCCTAGGGGAGATGAGTTGGAACATGTCTAAAAAGGCAAAGCGGGAACCGAGGTGCTGATCTTAC	69	753719114	ENA|MKGO01000002|MKGO01000002.1 Triticum urartu cultivar G1812 chromosome 2, whole genome shotgun sequence.
SNP_1075480	ENA|MKGO01000003|MKGO01000003.1	100	69	0	0	1	69	741805030	741804962	4.12e-28	128	ENA|MKGO01000003|MKGO01000003.1	69	69	69	0	100	1	-1	TGCAGCCGTCGGTGGCGTGCATGCGTTCCTTCTTCAACAGATAATTCGGCCAGGTCAACAGTTACCTAC	TGCAGCCGTCGGTGGCGTGCATGCGTTCCTTCTTCAACAGATAATTCGGCCAGGTCAACAGTTACCTAC	69	747046674	ENA|MKGO01000003|MKGO01000003.1 Triticum urartu cultivar G1812 chromosome 3, whole genome shotgun sequence.
SNP_1075798	ENA|MKGO01000002|MKGO01000002.1	100	69	0	0	1	69	710957315	710957383	4.12e-28	128	ENA|MKGO01000002|MKGO01000002.1	69	69	69	0	100	1	1	TGCAGACTGCATTCAAGATGCCATACAGGGTGTAGCTCCGCTTGTAACTATCAGCAGTTACCTACTTCC	TGCAGACTGCATTCAAGATGCCATACAGGGTGTAGCTCCGCTTGTAACTATCAGCAGTTACCTACTTCC	69	753719114	ENA|MKGO01000002|MKGO01000002.1 Triticum urartu cultivar G1812 chromosome 2, whole genome shotgun sequence.
SNP_1075798	ENA|MKGO01000002|MKGO01000002.1	100	69	0	0	1	69	711284782	711284850	4.12e-28	128	ENA|MKGO01000002|MKGO01000002.1	69	69	69	0	100	1	1	TGCAGACTGCATTCAAGATGCCATACAGGGTGTAGCTCCGCTTGTAACTATCAGCAGTTACCTACTTCC	TGCAGACTGCATTCAAGATGCCATACAGGGTGTAGCTCCGCTTGTAACTATCAGCAGTTACCTACTTCC	69	753719114	ENA|MKGO01000002|MKGO01000002.1 Triticum urartu cultivar G1812 chromosome 2, whole genome shotgun sequence.
SNP_1077317	ENA|MKGO01000002|MKGO01000002.1	100	69	0	0	1	69	98922145	98922213	4.12e-28	128	ENA|MKGO01000002|MKGO01000002.1	69	69	69	0	100	1	1	TGCAGTGCTTTTCCGCATCTTTCCCTCGCTTTAATCGTTTTTCACCTTGACACCTTTGCATCCTCCACT	TGCAGTGCTTTTCCGCATCTTTCCCTCGCTTTAATCGTTTTTCACCTTGACACCTTTGCATCCTCCACT	69	753719114	ENA|MKGO01000002|MKGO01000002.1 Triticum urartu cultivar G1812 chromosome 2, whole genome shotgun sequence.
SNP_1077317	ENA|MKGO01000002|MKGO01000002.1	100	69	0	0	1	69	98980539	98980607	4.12e-28	128	ENA|MKGO01000002|MKGO01000002.1	69	69	69	0	100	1	1	TGCAGTGCTTTTCCGCATCTTTCCCTCGCTTTAATCGTTTTTCACCTTGACACCTTTGCATCCTCCACT	TGCAGTGCTTTTCCGCATCTTTCCCTCGCTTTAATCGTTTTTCACCTTGACACCTTTGCATCCTCCACT	69	753719114	ENA|MKGO01000002|MKGO01000002.1 Triticum urartu cultivar G1812 chromosome 2, whole genome shotgun sequence.
SNP_1077317	ENA|MKGO01000002|MKGO01000002.1	92.188	64	4	1	6	69	98762275	98762337	1.94e-16	89.8	ENA|MKGO01000002|MKGO01000002.1	48	59	59	1	92.19	1	1	TGCTTTTCCGCATCTTTCCCTCGCTTTAATCGTTTTTCACCTTGACACCTTTGCATCCTCCACT	TGCTTTTCCGCGCCTTTCCCCCGC-TTAATCATTTTTCACCTTGACACCTTTGCATCCTCCACT	69	753719114	ENA|MKGO01000002|MKGO01000002.1 Triticum urartu cultivar G1812 chromosome 2, whole genome shotgun sequence.
SNP_1077755	ENA|MKGO01000002|MKGO01000002.1	100	69	0	0	1	69	649499477	649499545	4.12e-28	128	ENA|MKGO01000002|MKGO01000002.1	69	69	69	0	100	1	1	TGCAGGAATATAAAACGGCAGCATAGCTTTGACCTAATTATCACCTGTCACCGATCTGCGATCACATCA	TGCAGGAATATAAAACGGCAGCATAGCTTTGACCTAATTATCACCTGTCACCGATCTGCGATCACATCA	69	753719114	ENA|MKGO01000002|MKGO01000002.1 Triticum urartu cultivar G1812 chromosome 2, whole genome shotgun sequence.
SNP_1077884	ENA|MKGO01000003|MKGO01000003.1	100	61	0	0	1	61	660840625	660840565	1.15e-23	113	ENA|MKGO01000003|MKGO01000003.1	61	61	61	0	100	1	-1	TGCAGCTACTAGCACTGCTGTCAACCCTCGTGATTGGGCAGGACTGAGAAAAAGGAAGCAT	TGCAGCTACTAGCACTGCTGTCAACCCTCGTGATTGGGCAGGACTGAGAAAAAGGAAGCAT	69	747046674	ENA|MKGO01000003|MKGO01000003.1 Triticum urartu cultivar G1812 chromosome 3, whole genome shotgun sequence.
SNP_1078265	ENA|MKGO01004622|MKGO01004622.1	100	69	0	0	1	69	1060	1128	4.12e-28	128	ENA|MKGO01004622|MKGO01004622.1	69	69	69	0	100	1	1	TGCAGATAAAAACAGGAGCTACACACAAAACTGGCAAAGCCTCCCCAAAAAATTGTACCTGCACTGGAC	TGCAGATAAAAACAGGAGCTACACACAAAACTGGCAAAGCCTCCCCAAAAAATTGTACCTGCACTGGAC	69	6695	ENA|MKGO01004622|MKGO01004622.1 Triticum urartu cultivar G1812 TuUngrouped_contig_4913, whole genome shotgun sequence.
SNP_1078277	ENA|MKGO01000004|MKGO01000004.1	97.101	69	2	0	1	69	595535938	595535870	8.92e-25	117	ENA|MKGO01000004|MKGO01000004.1	63	67	67	0	97.1	1	-1	TGCAGAGTCTATAACACTAGACGAAAGACAGAGTTAATCTATGGTAGAGAGGATACTCACAGTGATGAC	TGCAGAGTCTATAACACTAGAGGAAAGACAGAGTTAACCTATGGTAGAGAGGATACTCACAGTGATGAC	69	619584425	ENA|MKGO01000004|MKGO01000004.1 Triticum urartu cultivar G1812 chromosome 4, whole genome shotgun sequence.
SNP_1078277	ENA|MKGO01000004|MKGO01000004.1	97.101	69	2	0	1	69	595700984	595701052	8.92e-25	117	ENA|MKGO01000004|MKGO01000004.1	63	67	67	0	97.1	1	1	TGCAGAGTCTATAACACTAGACGAAAGACAGAGTTAATCTATGGTAGAGAGGATACTCACAGTGATGAC	TGCAGAGTCTATAACACTAGAGGAAAGACAGAGTTAACCTATGGTAGAGAGGATACTCACAGTGATGAC	69	619584425	ENA|MKGO01000004|MKGO01000004.1 Triticum urartu cultivar G1812 chromosome 4, whole genome shotgun sequence.
SNP_1080223	ENA|MKGO01000001|MKGO01000001.1	100	69	0	0	1	69	569624131	569624199	4.12e-28	128	ENA|MKGO01000001|MKGO01000001.1	69	69	69	0	100	1	1	TGCAGATCGCGCGCGGCATGGAGCACCTCCACTCCAAGAAGATCTACCACGGCGAGCTCAACCCGTCCA	TGCAGATCGCGCGCGGCATGGAGCACCTCCACTCCAAGAAGATCTACCACGGCGAGCTCAACCCGTCCA	69	584211917	ENA|MKGO01000001|MKGO01000001.1 Triticum urartu cultivar G1812 chromosome 1, whole genome shotgun sequence.
SNP_1080286	ENA|MKGO01000007|MKGO01000007.1	100	69	0	0	1	69	24781994	24782062	4.12e-28	128	ENA|MKGO01000007|MKGO01000007.1	69	69	69	0	100	1	1	TGCAGGTAGTCGGTGTGAACTGACACCAGTGCTTAAACATAAATCCAGCCCTGGCCACGCCTACGAGGC	TGCAGGTAGTCGGTGTGAACTGACACCAGTGCTTAAACATAAATCCAGCCCTGGCCACGCCTACGAGGC	69	719689837	ENA|MKGO01000007|MKGO01000007.1 Triticum urartu cultivar G1812 chromosome 7, whole genome shotgun sequence.
SNP_1080286	ENA|MKGO01000003|MKGO01000003.1	98.551	69	1	0	1	69	700614633	700614565	1.92e-26	122	ENA|MKGO01000003|MKGO01000003.1	66	68	68	0	98.55	1	-1	TGCAGGTAGTCGGTGTGAACTGACACCAGTGCTTAAACATAAATCCAGCCCTGGCCACGCCTACGAGGC	TGCAGGTAGTCGGTGTGAACTGACACCAGTGCTTAAACATAAATCCAGCCCTGGCCACACCTACGAGGC	69	747046674	ENA|MKGO01000003|MKGO01000003.1 Triticum urartu cultivar G1812 chromosome 3, whole genome shotgun sequence.
SNP_1080311	ENA|MKGO01000005|MKGO01000005.1	97.436	39	1	0	28	66	641014270	641014308	9.11e-10	67.6	ENA|MKGO01000005|MKGO01000005.1	36	38	38	0	97.44	1	1	GGAACGTGTGTGTGCTGTTAGTCAGTTGAGTAATAACCG	GGAACATGTGTGTGCTGTTAGTCAGTTGAGTAATAACCG	69	661480603	ENA|MKGO01000005|MKGO01000005.1 Triticum urartu cultivar G1812 chromosome 5, whole genome shotgun sequence.
SNP_1080931	ENA|MKGO01005516|MKGO01005516.1	98.551	69	1	0	1	69	3718	3786	1.92e-26	122	ENA|MKGO01005516|MKGO01005516.1	66	68	68	0	98.55	1	1	TGCAGATTCCAAATGCACAGAGAGAGAGTTCGCCCGCGATGGATTTTGCTCTCGCGCGGTGGTGGAGGA	TGCAGATTCCAAATGCACAGAGAGAGAGTTCGCCCGCGATGGAATTTGCTCTCGCGCGGTGGTGGAGGA	69	11554	ENA|MKGO01005516|MKGO01005516.1 Triticum urartu cultivar G1812 TuUngrouped_contig_5808, whole genome shotgun sequence.
SNP_1080931	ENA|MKGO01000007|MKGO01000007.1	98.551	69	1	0	1	69	479121015	479121083	1.92e-26	122	ENA|MKGO01000007|MKGO01000007.1	66	68	68	0	98.55	1	1	TGCAGATTCCAAATGCACAGAGAGAGAGTTCGCCCGCGATGGATTTTGCTCTCGCGCGGTGGTGGAGGA	TGCAGATTCCAAATGCACAGAGAGAGAGTTCGCCCGCGATGGAATTTGCTCTCGCGCGGTGGTGGAGGA	69	719689837	ENA|MKGO01000007|MKGO01000007.1 Triticum urartu cultivar G1812 chromosome 7, whole genome shotgun sequence.
SNP_1080992	ENA|MKGO01000002|MKGO01000002.1	96.875	64	2	0	1	64	728659638	728659575	5.37e-22	108	ENA|MKGO01000002|MKGO01000002.1	58	62	62	0	96.88	1	-1	TGCAGTTGCACGTCATCCGTCAACACCTTTTAATTAGTTAATCAGTTCATAATACGTACGCCCG	TGCAGTTGCACGTCATCCGTCAACACATTTTAAGTAGTTAATCAGTTCATAATACGTACGCCCG	69	753719114	ENA|MKGO01000002|MKGO01000002.1 Triticum urartu cultivar G1812 chromosome 2, whole genome shotgun sequence.
SNP_1081144	ENA|MKGO01000001|MKGO01000001.1	100	69	0	0	1	69	390160644	390160576	4.12e-28	128	ENA|MKGO01000001|MKGO01000001.1	69	69	69	0	100	1	-1	TGCAGACACTCCTGGGCCCAGAGGCAGACCAGCCACCTGACCAAGCCACAGCTTCCGACTTGACCTGAC	TGCAGACACTCCTGGGCCCAGAGGCAGACCAGCCACCTGACCAAGCCACAGCTTCCGACTTGACCTGAC	69	584211917	ENA|MKGO01000001|MKGO01000001.1 Triticum urartu cultivar G1812 chromosome 1, whole genome shotgun sequence.
SNP_1081785	ENA|MKGO01000005|MKGO01000005.1	96.923	65	2	0	5	69	450036698	450036634	1.49e-22	110	ENA|MKGO01000005|MKGO01000005.1	59	63	63	0	96.92	1	-1	GCGAAGATGCCGCCTTCCACCAGTCTCCAGTTGTAGCCGGCTCCGAGACGATGCCCCAAGAAGGA	GCGAAGATGCCGCCTTCCACCGGTCTCCAGTTGTAGCCGGCTCCGAGACGATGCCCCAAGGAGGA	69	661480603	ENA|MKGO01000005|MKGO01000005.1 Triticum urartu cultivar G1812 chromosome 5, whole genome shotgun sequence.
SNP_1081785	ENA|MKGO01000006|MKGO01000006.1	95.455	66	2	1	5	69	466601391	466601326	6.94e-21	104	ENA|MKGO01000006|MKGO01000006.1	56	63	63	1	95.45	1	-1	GCGAAGATGCCGCCTTCCACCAGTCTCCAGTTGTAGCCGGCTCCGAGACGATGCCCC-AAGAAGGA	GCGAAGATGCCGCCTTCCACCGGTCTCCAGTTGTAGCCGGCTCCGAGACGATGCCCCCAAGGAGGA	69	575865107	ENA|MKGO01000006|MKGO01000006.1 Triticum urartu cultivar G1812 chromosome 6, whole genome shotgun sequence.
SNP_1081785	ENA|MKGO01000007|MKGO01000007.1	93.846	65	3	1	6	69	660242233	660242169	1.16e-18	97.1	ENA|MKGO01000007|MKGO01000007.1	52	61	61	1	93.85	1	-1	CGAAGATGCCGCCTTCCACCAGTCTCCAGTTGTAGCCGGCTCCGAGACGATGCCCC-AAGAAGGA	CGAAGATGCCGCCTTCCACCGGTCTCCGGTTGTAGCCGGCTCCGAGACGATGCCCCCAAGGAGGA	69	719689837	ENA|MKGO01000007|MKGO01000007.1 Triticum urartu cultivar G1812 chromosome 7, whole genome shotgun sequence.
SNP_1081786	ENA|MKGO01000001|MKGO01000001.1	97.101	69	2	0	1	69	54316874	54316942	8.92e-25	117	ENA|MKGO01000001|MKGO01000001.1	63	67	67	0	97.1	1	1	TGCAGCCTACCCAACAAATCCTCTATCTGCTCCTTAGGTTTTCCCAAACCTGATGCTTCATCTGGGTTC	TGCAGCCTACCTAACAAATCCTCTATCTGCTCCTTAGGTTTTCCCAAACCTGATGCTTCATTTGGGTTC	69	584211917	ENA|MKGO01000001|MKGO01000001.1 Triticum urartu cultivar G1812 chromosome 1, whole genome shotgun sequence.
SNP_1082338	ENA|MKGO01006104|MKGO01006104.1	100	69	0	0	1	69	11407	11339	4.12e-28	128	ENA|MKGO01006104|MKGO01006104.1	69	69	69	0	100	1	-1	TGCAGGTCGTTTCAAATTCCCCAAATCCTCAAATCGCTTTGTTGGCCGGCCGGTTGCATTCTTGTACCG	TGCAGGTCGTTTCAAATTCCCCAAATCCTCAAATCGCTTTGTTGGCCGGCCGGTTGCATTCTTGTACCG	69	16423	ENA|MKGO01006104|MKGO01006104.1 Triticum urartu cultivar G1812 TuUngrouped_contig_6396, whole genome shotgun sequence.
SNP_1082338	ENA|MKGO01005976|MKGO01005976.1	97.5	40	1	0	30	69	16390	16429	2.53e-10	69.4	ENA|MKGO01005976|MKGO01005976.1	37	39	39	0	97.5	1	1	CAAATCGCTTTGTTGGCCGGCCGGTTGCATTCTTGTACCG	CAAATCGCTCTGTTGGCCGGCCGGTTGCATTCTTGTACCG	69	21924	ENA|MKGO01005976|MKGO01005976.1 Triticum urartu cultivar G1812 TuUngrouped_contig_6268, whole genome shotgun sequence.
SNP_1082742	ENA|MKGO01000007|MKGO01000007.1	100	69	0	0	1	69	120115494	120115562	4.12e-28	128	ENA|MKGO01000007|MKGO01000007.1	69	69	69	0	100	1	1	TGCAGAACCAGAACGATTATAGTTGTACAGACAGTGGAAGATGTCAACCAGCCGGCAATTCTCACCTCT	TGCAGAACCAGAACGATTATAGTTGTACAGACAGTGGAAGATGTCAACCAGCCGGCAATTCTCACCTCT	69	719689837	ENA|MKGO01000007|MKGO01000007.1 Triticum urartu cultivar G1812 chromosome 7, whole genome shotgun sequence.
SNP_1082742	ENA|MKGO01000006|MKGO01000006.1	98.551	69	1	0	1	69	488898692	488898624	1.92e-26	122	ENA|MKGO01000006|MKGO01000006.1	66	68	68	0	98.55	1	-1	TGCAGAACCAGAACGATTATAGTTGTACAGACAGTGGAAGATGTCAACCAGCCGGCAATTCTCACCTCT	TGCAGAACCAGAACGATTATAGTTGTACAGACAGTGGAAGATGTCAACTAGCCGGCAATTCTCACCTCT	69	575865107	ENA|MKGO01000006|MKGO01000006.1 Triticum urartu cultivar G1812 chromosome 6, whole genome shotgun sequence.
SNP_1083056	ENA|MKGO01000002|MKGO01000002.1	98.551	69	1	0	1	69	747796782	747796850	1.92e-26	122	ENA|MKGO01000002|MKGO01000002.1	66	68	68	0	98.55	1	1	TGCAGCATCACCGCCCATGTATGCCTCTGGGTTTGAAGCCGCCTCAAGAGCATTCAGGCTATCTGATTC	TGCAGCATCACCGCCCATGTATGCCTCTGGTTTTGAAGCCGCCTCAAGAGCATTCAGGCTATCTGATTC	69	753719114	ENA|MKGO01000002|MKGO01000002.1 Triticum urartu cultivar G1812 chromosome 2, whole genome shotgun sequence.
SNP_1083056	ENA|MKGO01000002|MKGO01000002.1	97.101	69	2	0	1	69	188642916	188642984	8.92e-25	117	ENA|MKGO01000002|MKGO01000002.1	63	67	67	0	97.1	1	1	TGCAGCATCACCGCCCATGTATGCCTCTGGGTTTGAAGCCGCCTCAAGAGCATTCAGGCTATCTGATTC	TGCAGCATCACCGCCCATGTATGCCTCTGGGTTTGAAGCCGCCTCAAGAGCATTCAAACTATCTGATTC	69	753719114	ENA|MKGO01000002|MKGO01000002.1 Triticum urartu cultivar G1812 chromosome 2, whole genome shotgun sequence.
SNP_1083426	ENA|MKGO01000004|MKGO01000004.1	98.551	69	1	0	1	69	94091212	94091144	1.92e-26	122	ENA|MKGO01000004|MKGO01000004.1	66	68	68	0	98.55	1	-1	TGCAGCCATCCTCGTCGTCCGTCGCCGCCTCCCGGAATCCATTGTCATGGCTCATGGTGTACGGTTCTT	TGCAGCCATCATCGTCGTCCGTCGCCGCCTCCCGGAATCCATTGTCATGGCTCATGGTGTACGGTTCTT	69	619584425	ENA|MKGO01000004|MKGO01000004.1 Triticum urartu cultivar G1812 chromosome 4, whole genome shotgun sequence.
SNP_1083779	ENA|MKGO01000003|MKGO01000003.1	98.551	69	1	0	1	69	209967165	209967233	1.92e-26	122	ENA|MKGO01000003|MKGO01000003.1	66	68	68	0	98.55	1	1	TGCAGGTCCCCTCACGTCTTCCTCCACTTCCCAGTCTGCGTCGGCAAATATCTACTCTAGACAGCGGTG	TGCAGGTCCCCTCACGTCTTCCTCCACTTTCCAGTCTGCGTCGGCAAATATCTACTCTAGACAGCGGTG	69	747046674	ENA|MKGO01000003|MKGO01000003.1 Triticum urartu cultivar G1812 chromosome 3, whole genome shotgun sequence.
SNP_1083976	ENA|MKGO01000006|MKGO01000006.1	100	69	0	0	1	69	384864467	384864399	4.12e-28	128	ENA|MKGO01000006|MKGO01000006.1	69	69	69	0	100	1	-1	TGCAGGTGACCCACTTCAAGTGCGGAGGCGTCGCCCTCGGCATAGGCATGCAGCACCATGTCGCGGACG	TGCAGGTGACCCACTTCAAGTGCGGAGGCGTCGCCCTCGGCATAGGCATGCAGCACCATGTCGCGGACG	69	575865107	ENA|MKGO01000006|MKGO01000006.1 Triticum urartu cultivar G1812 chromosome 6, whole genome shotgun sequence.
SNP_1083976	ENA|MKGO01000006|MKGO01000006.1	100	69	0	0	1	69	385455695	385455627	4.12e-28	128	ENA|MKGO01000006|MKGO01000006.1	69	69	69	0	100	1	-1	TGCAGGTGACCCACTTCAAGTGCGGAGGCGTCGCCCTCGGCATAGGCATGCAGCACCATGTCGCGGACG	TGCAGGTGACCCACTTCAAGTGCGGAGGCGTCGCCCTCGGCATAGGCATGCAGCACCATGTCGCGGACG	69	575865107	ENA|MKGO01000006|MKGO01000006.1 Triticum urartu cultivar G1812 chromosome 6, whole genome shotgun sequence.
SNP_1084064	ENA|MKGO01000002|MKGO01000002.1	98.485	66	1	0	1	66	469666669	469666604	8.92e-25	117	ENA|MKGO01000002|MKGO01000002.1	63	65	65	0	98.48	1	-1	TGCAGACCTTCTCCTGCCTGCTGTACTTCCTCCTCAGGCTTCGTCCCGCCTGCCCCTCTTCAGCCG	TGCAGACCTTCTCCTGCCTGCTGTACTTCCTCCTCAGGCTTCGTACCGCCTGCCCCTCTTCAGCCG	69	753719114	ENA|MKGO01000002|MKGO01000002.1 Triticum urartu cultivar G1812 chromosome 2, whole genome shotgun sequence.
SNP_1085250	ENA|MKGO01000006|MKGO01000006.1	95.652	69	3	0	1	69	5228356	5228288	4.15e-23	111	ENA|MKGO01000006|MKGO01000006.1	60	66	66	0	95.65	1	-1	TGCAGGAATGTCGTGGCGCTATGCAGTTTCAGTCACCCAGGGAATGAATGCAGATTGTTTGTACAAGGA	TGCAGGAATGCCGTGGCGCTATGCAGTTTCAGTCACCCAGGGAATTAATGCAGATTGTATGTACAAGGA	69	575865107	ENA|MKGO01000006|MKGO01000006.1 Triticum urartu cultivar G1812 chromosome 6, whole genome shotgun sequence.
SNP_1085496	ENA|MKGO01000005|MKGO01000005.1	100	32	0	0	2	33	484566000	484566031	1.52e-07	60.2	ENA|MKGO01000005|MKGO01000005.1	32	32	32	0	100	1	1	GCAGAAGGCGTGTACACACCAAGGCTTGAAAC	GCAGAAGGCGTGTACACACCAAGGCTTGAAAC	69	661480603	ENA|MKGO01000005|MKGO01000005.1 Triticum urartu cultivar G1812 chromosome 5, whole genome shotgun sequence.
SNP_1087379	ENA|MKGO01000001|MKGO01000001.1	100	69	0	0	1	69	373144015	373144083	4.12e-28	128	ENA|MKGO01000001|MKGO01000001.1	69	69	69	0	100	1	1	TGCAGGCCTTTCTATTTCTATTTGCGGACTTGGTACAGTTTGCTTATGTTTTCTAAAAAGAACTGCTTG	TGCAGGCCTTTCTATTTCTATTTGCGGACTTGGTACAGTTTGCTTATGTTTTCTAAAAAGAACTGCTTG	69	584211917	ENA|MKGO01000001|MKGO01000001.1 Triticum urartu cultivar G1812 chromosome 1, whole genome shotgun sequence.
SNP_1087827	ENA|MKGO01000001|MKGO01000001.1	100	64	0	0	1	64	561292280	561292217	2.48e-25	119	ENA|MKGO01000001|MKGO01000001.1	64	64	64	0	100	1	-1	TGCAGACCAACAGCAACGTTCCGCTGGATTCTAGCAGGTATCGCGGCGAGTCGCCGAGGACCCG	TGCAGACCAACAGCAACGTTCCGCTGGATTCTAGCAGGTATCGCGGCGAGTCGCCGAGGACCCG	69	584211917	ENA|MKGO01000001|MKGO01000001.1 Triticum urartu cultivar G1812 chromosome 1, whole genome shotgun sequence.
SNP_1087827	ENA|MKGO01000001|MKGO01000001.1	93.443	61	4	0	1	61	561542502	561542562	5.41e-17	91.6	ENA|MKGO01000001|MKGO01000001.1	49	57	57	0	93.44	1	1	TGCAGACCAACAGCAACGTTCCGCTGGATTCTAGCAGGTATCGCGGCGAGTCGCCGAGGAC	TGCAAACCAACAACAACGTGCCGCTGGATTCTAGCAGGTATCGCGGCGAGTCGTCGAGGAC	69	584211917	ENA|MKGO01000001|MKGO01000001.1 Triticum urartu cultivar G1812 chromosome 1, whole genome shotgun sequence.
SNP_1088008	ENA|MKGO01000003|MKGO01000003.1	100	54	0	0	1	54	579101908	579101855	8.98e-20	100	ENA|MKGO01000003|MKGO01000003.1	54	54	54	0	100	1	-1	TGCAGATATAAAATTCTGATGGACGCGTGACCTTGCAACGAAGCGGCTACACCG	TGCAGATATAAAATTCTGATGGACGCGTGACCTTGCAACGAAGCGGCTACACCG	69	747046674	ENA|MKGO01000003|MKGO01000003.1 Triticum urartu cultivar G1812 chromosome 3, whole genome shotgun sequence.
SNP_1088061	ENA|MKGO01000002|MKGO01000002.1	100	69	0	0	1	69	711922981	711922913	4.12e-28	128	ENA|MKGO01000002|MKGO01000002.1	69	69	69	0	100	1	-1	TGCAGGTACAGGTCCACCACCAACGGCAGCAACAAGCCTTCCGCTGAAAGGTAGGGGAATCTCGCTTGA	TGCAGGTACAGGTCCACCACCAACGGCAGCAACAAGCCTTCCGCTGAAAGGTAGGGGAATCTCGCTTGA	69	753719114	ENA|MKGO01000002|MKGO01000002.1 Triticum urartu cultivar G1812 chromosome 2, whole genome shotgun sequence.
SNP_1088061	ENA|MKGO01000002|MKGO01000002.1	98.551	69	1	0	1	69	711958336	711958404	1.92e-26	122	ENA|MKGO01000002|MKGO01000002.1	66	68	68	0	98.55	1	1	TGCAGGTACAGGTCCACCACCAACGGCAGCAACAAGCCTTCCGCTGAAAGGTAGGGGAATCTCGCTTGA	TGCAGGTACAGGTCCACCACCAACGGCAGCAACAAGCCTTCCGCTGAAAGGTAGGGGAATCACGCTTGA	69	753719114	ENA|MKGO01000002|MKGO01000002.1 Triticum urartu cultivar G1812 chromosome 2, whole genome shotgun sequence.
SNP_1088641	ENA|MKGO01000003|MKGO01000003.1	100	69	0	0	1	69	590296003	590296071	4.12e-28	128	ENA|MKGO01000003|MKGO01000003.1	69	69	69	0	100	1	1	TGCAGAAGCCAAACGATGTACCCCTCATGTTCGTTCGTCGCTCCTCCATTCCCAAATAGTCAACTGCAT	TGCAGAAGCCAAACGATGTACCCCTCATGTTCGTTCGTCGCTCCTCCATTCCCAAATAGTCAACTGCAT	69	747046674	ENA|MKGO01000003|MKGO01000003.1 Triticum urartu cultivar G1812 chromosome 3, whole genome shotgun sequence.
SNP_1088641	ENA|MKGO01000003|MKGO01000003.1	100	69	0	0	1	69	590488125	590488057	4.12e-28	128	ENA|MKGO01000003|MKGO01000003.1	69	69	69	0	100	1	-1	TGCAGAAGCCAAACGATGTACCCCTCATGTTCGTTCGTCGCTCCTCCATTCCCAAATAGTCAACTGCAT	TGCAGAAGCCAAACGATGTACCCCTCATGTTCGTTCGTCGCTCCTCCATTCCCAAATAGTCAACTGCAT	69	747046674	ENA|MKGO01000003|MKGO01000003.1 Triticum urartu cultivar G1812 chromosome 3, whole genome shotgun sequence.
SNP_1088932	ENA|MKGO01000006|MKGO01000006.1	100	59	0	0	1	59	548304740	548304682	1.49e-22	110	ENA|MKGO01000006|MKGO01000006.1	59	59	59	0	100	1	-1	TGCAGGCGTCCATCTCATTTGGTCGTTCACTAACCAACTTTCTACGATTGCTTTATGGA	TGCAGGCGTCCATCTCATTTGGTCGTTCACTAACCAACTTTCTACGATTGCTTTATGGA	69	575865107	ENA|MKGO01000006|MKGO01000006.1 Triticum urartu cultivar G1812 chromosome 6, whole genome shotgun sequence.
SNP_1088932	ENA|MKGO01000006|MKGO01000006.1	89.655	58	2	2	12	69	548338104	548338157	7.04e-11	71.3	ENA|MKGO01000006|MKGO01000006.1	38	52	52	4	89.66	1	1	ATCTCATTTGGTCGTTCACTAACCAACTTTCTACGATTGCTTTATGGAAGCATCGGCC	ATCTCTTTTGGTCGT---C-AAGCAACTTTCTACGATTGCTTTATGGAAGCATCGGCC	69	575865107	ENA|MKGO01000006|MKGO01000006.1 Triticum urartu cultivar G1812 chromosome 6, whole genome shotgun sequence.
SNP_1089360	ENA|MKGO01000005|MKGO01000005.1	100	69	0	0	1	69	386360771	386360839	4.12e-28	128	ENA|MKGO01000005|MKGO01000005.1	69	69	69	0	100	1	1	TGCAGAACGCCAACATGCTGGCGCCCAACAACAGCGAGACCCACCCGTGGCACCTCCACGGCCACGACT	TGCAGAACGCCAACATGCTGGCGCCCAACAACAGCGAGACCCACCCGTGGCACCTCCACGGCCACGACT	69	661480603	ENA|MKGO01000005|MKGO01000005.1 Triticum urartu cultivar G1812 chromosome 5, whole genome shotgun sequence.
SNP_1089483	ENA|MKGO01000001|MKGO01000001.1	100	69	0	0	1	69	109246898	109246966	4.12e-28	128	ENA|MKGO01000001|MKGO01000001.1	69	69	69	0	100	1	1	TGCAGTCCGCGAGCCAGCAGCAGCAGCAGCGGTCCAAGTCACCGAGCCCGATCTTTCCGATGCGTTCCG	TGCAGTCCGCGAGCCAGCAGCAGCAGCAGCGGTCCAAGTCACCGAGCCCGATCTTTCCGATGCGTTCCG	69	584211917	ENA|MKGO01000001|MKGO01000001.1 Triticum urartu cultivar G1812 chromosome 1, whole genome shotgun sequence.
SNP_1089518	ENA|MKGO01000001|MKGO01000001.1	100	69	0	0	1	69	465796465	465796533	4.12e-28	128	ENA|MKGO01000001|MKGO01000001.1	69	69	69	0	100	1	1	TGCAGCCGCTTAATTTGCTCATGGATTTAGTTATGACGGTCCGACCCGCGGTGGTGCCGCCACTTACCG	TGCAGCCGCTTAATTTGCTCATGGATTTAGTTATGACGGTCCGACCCGCGGTGGTGCCGCCACTTACCG	69	584211917	ENA|MKGO01000001|MKGO01000001.1 Triticum urartu cultivar G1812 chromosome 1, whole genome shotgun sequence.
SNP_1089536	ENA|MKGO01000002|MKGO01000002.1	100	69	0	0	1	69	606634747	606634815	4.12e-28	128	ENA|MKGO01000002|MKGO01000002.1	69	69	69	0	100	1	1	TGCAGGGTGTTCCAGAAGCAGAAAGTGGACGGCGAGCAAGACAACGCCCGCTCCTCTTCGCCGACCTTC	TGCAGGGTGTTCCAGAAGCAGAAAGTGGACGGCGAGCAAGACAACGCCCGCTCCTCTTCGCCGACCTTC	69	753719114	ENA|MKGO01000002|MKGO01000002.1 Triticum urartu cultivar G1812 chromosome 2, whole genome shotgun sequence.
SNP_1089816	ENA|MKGO01000270|MKGO01000270.1	100	69	0	0	1	69	61252	61320	4.12e-28	128	ENA|MKGO01000270|MKGO01000270.1	69	69	69	0	100	1	1	TGCAGCAGGAGCGCTTTGCTGTACGGGACGTCGTGCACGGGCACTGAGTGCAGCGCGTTGAGGTGAAGG	TGCAGCAGGAGCGCTTTGCTGTACGGGACGTCGTGCACGGGCACTGAGTGCAGCGCGTTGAGGTGAAGG	69	93091	ENA|MKGO01000270|MKGO01000270.1 Triticum urartu cultivar G1812 TuUngrouped_contig_334, whole genome shotgun sequence.
SNP_1089816	ENA|MKGO01000005|MKGO01000005.1	100	69	0	0	1	69	282126904	282126972	4.12e-28	128	ENA|MKGO01000005|MKGO01000005.1	69	69	69	0	100	1	1	TGCAGCAGGAGCGCTTTGCTGTACGGGACGTCGTGCACGGGCACTGAGTGCAGCGCGTTGAGGTGAAGG	TGCAGCAGGAGCGCTTTGCTGTACGGGACGTCGTGCACGGGCACTGAGTGCAGCGCGTTGAGGTGAAGG	69	661480603	ENA|MKGO01000005|MKGO01000005.1 Triticum urartu cultivar G1812 chromosome 5, whole genome shotgun sequence.
SNP_1090511	ENA|MKGO01000003|MKGO01000003.1	98.551	69	1	0	1	69	4572433	4572501	1.92e-26	122	ENA|MKGO01000003|MKGO01000003.1	66	68	68	0	98.55	1	1	TGCAGAAACAGGGATTAAATCTTTGCTCATCCCTTATCTAACGGCGAGCAATCTAACGATGAAGGGAAA	TGCAGAAACAGGGATTAAATCTTTGCTGATCCCTTATCTAACGGCGAGCAATCTAACGATGAAGGGAAA	69	747046674	ENA|MKGO01000003|MKGO01000003.1 Triticum urartu cultivar G1812 chromosome 3, whole genome shotgun sequence.
SNP_1090511	ENA|MKGO01000003|MKGO01000003.1	98.551	69	1	0	1	69	4661322	4661254	1.92e-26	122	ENA|MKGO01000003|MKGO01000003.1	66	68	68	0	98.55	1	-1	TGCAGAAACAGGGATTAAATCTTTGCTCATCCCTTATCTAACGGCGAGCAATCTAACGATGAAGGGAAA	TGCAGAAACAGGGATTAAATCTTTGCTGATCCCTTATCTAACGGCGAGCAATCTAACGATGAAGGGAAA	69	747046674	ENA|MKGO01000003|MKGO01000003.1 Triticum urartu cultivar G1812 chromosome 3, whole genome shotgun sequence.
SNP_1090569	ENA|MKGO01000003|MKGO01000003.1	100	59	0	0	1	59	9359344	9359286	1.49e-22	110	ENA|MKGO01000003|MKGO01000003.1	59	59	59	0	100	1	-1	TGCAGGACCTCGTAGTCCACGCGGTCCCCGTGCCGCGCCACGACCCGCTCCTGCTCCCG	TGCAGGACCTCGTAGTCCACGCGGTCCCCGTGCCGCGCCACGACCCGCTCCTGCTCCCG	69	747046674	ENA|MKGO01000003|MKGO01000003.1 Triticum urartu cultivar G1812 chromosome 3, whole genome shotgun sequence.
SNP_1090569	ENA|MKGO01000002|MKGO01000002.1	100	59	0	0	1	59	172113721	172113779	1.49e-22	110	ENA|MKGO01000002|MKGO01000002.1	59	59	59	0	100	1	1	TGCAGGACCTCGTAGTCCACGCGGTCCCCGTGCCGCGCCACGACCCGCTCCTGCTCCCG	TGCAGGACCTCGTAGTCCACGCGGTCCCCGTGCCGCGCCACGACCCGCTCCTGCTCCCG	69	753719114	ENA|MKGO01000002|MKGO01000002.1 Triticum urartu cultivar G1812 chromosome 2, whole genome shotgun sequence.
SNP_1090569	ENA|MKGO01000002|MKGO01000002.1	96.491	57	2	0	1	57	5707682	5707738	4.18e-18	95.3	ENA|MKGO01000002|MKGO01000002.1	51	55	55	0	96.49	1	1	TGCAGGACCTCGTAGTCCACGCGGTCCCCGTGCCGCGCCACGACCCGCTCCTGCTCC	TGCAGGACCTCGTAGTCCACGCGGTCCCCGTGCCGCGCCATGATCCGCTCCTGCTCC	69	753719114	ENA|MKGO01000002|MKGO01000002.1 Triticum urartu cultivar G1812 chromosome 2, whole genome shotgun sequence.
SNP_1090569	ENA|MKGO01004040|MKGO01004040.1	96.491	57	2	0	1	57	91	147	4.18e-18	95.3	ENA|MKGO01004040|MKGO01004040.1	51	55	55	0	96.49	1	1	TGCAGGACCTCGTAGTCCACGCGGTCCCCGTGCCGCGCCACGACCCGCTCCTGCTCC	TGCAGGACCTCGTAGTCCACGCGGTCCCCGTGCCGCGCCATGATCCGCTCCTGCTCC	69	5545	ENA|MKGO01004040|MKGO01004040.1 Triticum urartu cultivar G1812 TuUngrouped_contig_4331, whole genome shotgun sequence.
SNP_1090569	ENA|MKGO01000007|MKGO01000007.1	96.491	57	2	0	1	57	120380	120324	4.18e-18	95.3	ENA|MKGO01000007|MKGO01000007.1	51	55	55	0	96.49	1	-1	TGCAGGACCTCGTAGTCCACGCGGTCCCCGTGCCGCGCCACGACCCGCTCCTGCTCC	TGCAGGACCTCGTAGTCCACGCGGTCCCCATGCCGCGCCACGATCCGCTCCTGCTCC	69	719689837	ENA|MKGO01000007|MKGO01000007.1 Triticum urartu cultivar G1812 chromosome 7, whole genome shotgun sequence.
SNP_1090569	ENA|MKGO01000007|MKGO01000007.1	96.491	57	2	0	1	57	41945496	41945440	4.18e-18	95.3	ENA|MKGO01000007|MKGO01000007.1	51	55	55	0	96.49	1	-1	TGCAGGACCTCGTAGTCCACGCGGTCCCCGTGCCGCGCCACGACCCGCTCCTGCTCC	TGCAGGACCTCGTAGTCCACGCGGTCCCCATGCCGCGCCACGATCCGCTCCTGCTCC	69	719689837	ENA|MKGO01000007|MKGO01000007.1 Triticum urartu cultivar G1812 chromosome 7, whole genome shotgun sequence.
SNP_1090569	ENA|MKGO01000001|MKGO01000001.1	92.982	57	4	0	1	57	21973146	21973202	9.05e-15	84.2	ENA|MKGO01000001|MKGO01000001.1	45	53	53	0	92.98	1	1	TGCAGGACCTCGTAGTCCACGCGGTCCCCGTGCCGCGCCACGACCCGCTCCTGCTCC	TGCAGGACCTCGTAGTCCACGCGGTCCCCGTGCCGCTCCACAATCTGCTCCTGCTCC	69	584211917	ENA|MKGO01000001|MKGO01000001.1 Triticum urartu cultivar G1812 chromosome 1, whole genome shotgun sequence.
SNP_1090569	ENA|MKGO01000001|MKGO01000001.1	91.228	57	5	0	1	57	22014289	22014345	4.21e-13	78.7	ENA|MKGO01000001|MKGO01000001.1	42	52	52	0	91.23	1	1	TGCAGGACCTCGTAGTCCACGCGGTCCCCGTGCCGCGCCACGACCCGCTCCTGCTCC	TGCAGGACCTCGTAGTCCACGCGGTCCCCGTGCCGCTCCACAATCTGCTTCTGCTCC	69	584211917	ENA|MKGO01000001|MKGO01000001.1 Triticum urartu cultivar G1812 chromosome 1, whole genome shotgun sequence.
SNP_1090569	ENA|MKGO01004999|MKGO01004999.1	91.228	57	5	0	1	57	1313	1369	4.21e-13	78.7	ENA|MKGO01004999|MKGO01004999.1	42	52	52	0	91.23	1	1	TGCAGGACCTCGTAGTCCACGCGGTCCCCGTGCCGCGCCACGACCCGCTCCTGCTCC	TGCAGGACCTCGTAGTCCACGCGGTCCCCGTGCCGCTCCACAATCTGCTTCTGCTCC	69	14035	ENA|MKGO01004999|MKGO01004999.1 Triticum urartu cultivar G1812 TuUngrouped_contig_5290, whole genome shotgun sequence.
SNP_1090722	ENA|MKGO01000001|MKGO01000001.1	100	56	0	0	1	56	392380974	392380919	6.94e-21	104	ENA|MKGO01000001|MKGO01000001.1	56	56	56	0	100	1	-1	TGCAGCGTGCCCGTCGCCGTTGCTGTCAGACCTAGAAGAGCACCAGCCATGCGCCG	TGCAGCGTGCCCGTCGCCGTTGCTGTCAGACCTAGAAGAGCACCAGCCATGCGCCG	69	584211917	ENA|MKGO01000001|MKGO01000001.1 Triticum urartu cultivar G1812 chromosome 1, whole genome shotgun sequence.
SNP_1090899	ENA|MKGO01000002|MKGO01000002.1	100	53	0	0	1	53	154797773	154797721	3.23e-19	99	ENA|MKGO01000002|MKGO01000002.1	53	53	53	0	100	1	-1	TGCAGAGCGCGTAGAGCGCCGTGGCGGCGTCCTTCTTCCCGCGCGCGCCGCCG	TGCAGAGCGCGTAGAGCGCCGTGGCGGCGTCCTTCTTCCCGCGCGCGCCGCCG	69	753719114	ENA|MKGO01000002|MKGO01000002.1 Triticum urartu cultivar G1812 chromosome 2, whole genome shotgun sequence.
SNP_1090899	ENA|MKGO01000002|MKGO01000002.1	100	53	0	0	1	53	154884223	154884171	3.23e-19	99	ENA|MKGO01000002|MKGO01000002.1	53	53	53	0	100	1	-1	TGCAGAGCGCGTAGAGCGCCGTGGCGGCGTCCTTCTTCCCGCGCGCGCCGCCG	TGCAGAGCGCGTAGAGCGCCGTGGCGGCGTCCTTCTTCCCGCGCGCGCCGCCG	69	753719114	ENA|MKGO01000002|MKGO01000002.1 Triticum urartu cultivar G1812 chromosome 2, whole genome shotgun sequence.
SNP_1091244	ENA|MKGO01000001|MKGO01000001.1	100	61	0	0	1	61	360282769	360282829	1.15e-23	113	ENA|MKGO01000001|MKGO01000001.1	61	61	61	0	100	1	1	TGCAGGAGCGTTGAGGTCACCGTCTGTGTGACTCCGCAGGTGCCATCGTCTTCCGTGGCCG	TGCAGGAGCGTTGAGGTCACCGTCTGTGTGACTCCGCAGGTGCCATCGTCTTCCGTGGCCG	69	584211917	ENA|MKGO01000001|MKGO01000001.1 Triticum urartu cultivar G1812 chromosome 1, whole genome shotgun sequence.
SNP_1091637	ENA|MKGO01000005|MKGO01000005.1	100	69	0	0	1	69	466608148	466608216	4.12e-28	128	ENA|MKGO01000005|MKGO01000005.1	69	69	69	0	100	1	1	TGCAGGTGACCCCGTCGGTGCTGGCCGCAGGGCTGGCCGCCGACAACGTCATCTGCGCGCTCTACTTCA	TGCAGGTGACCCCGTCGGTGCTGGCCGCAGGGCTGGCCGCCGACAACGTCATCTGCGCGCTCTACTTCA	69	661480603	ENA|MKGO01000005|MKGO01000005.1 Triticum urartu cultivar G1812 chromosome 5, whole genome shotgun sequence.
SNP_1091718	ENA|MKGO01000001|MKGO01000001.1	100	54	0	0	1	54	520384571	520384518	8.98e-20	100	ENA|MKGO01000001|MKGO01000001.1	54	54	54	0	100	1	-1	TGCAGCCAGCAGGTGCAATGGGACGCAGGCGACGGCGCGACGCGGTGCGTGCCG	TGCAGCCAGCAGGTGCAATGGGACGCAGGCGACGGCGCGACGCGGTGCGTGCCG	69	584211917	ENA|MKGO01000001|MKGO01000001.1 Triticum urartu cultivar G1812 chromosome 1, whole genome shotgun sequence.
SNP_1091861	ENA|MKGO01000001|MKGO01000001.1	100	62	0	0	1	62	554235058	554234997	3.21e-24	115	ENA|MKGO01000001|MKGO01000001.1	62	62	62	0	100	1	-1	TGCAGACACACAGACAGCCTGGTCGGAACGGGACGGCGTCGGTTGGTCAAGATTTCGCCCCG	TGCAGACACACAGACAGCCTGGTCGGAACGGGACGGCGTCGGTTGGTCAAGATTTCGCCCCG	69	584211917	ENA|MKGO01000001|MKGO01000001.1 Triticum urartu cultivar G1812 chromosome 1, whole genome shotgun sequence.
SNP_1092591	ENA|MKGO01000001|MKGO01000001.1	100	69	0	0	1	69	532487781	532487713	4.12e-28	128	ENA|MKGO01000001|MKGO01000001.1	69	69	69	0	100	1	-1	TGCAGCCGCCGCACGGAGCAGCCCGCTGGAGTGGCGTGTGGCAACGACATCACGTGGAGTGGAGAGCGG	TGCAGCCGCCGCACGGAGCAGCCCGCTGGAGTGGCGTGTGGCAACGACATCACGTGGAGTGGAGAGCGG	69	584211917	ENA|MKGO01000001|MKGO01000001.1 Triticum urartu cultivar G1812 chromosome 1, whole genome shotgun sequence.
SNP_1092610	ENA|MKGO01000007|MKGO01000007.1	98.214	56	1	0	1	56	341051611	341051556	3.23e-19	99	ENA|MKGO01000007|MKGO01000007.1	53	55	55	0	98.21	1	-1	TGCAGCCTGCTACCTCAGGCTGCGACTGCTACTGCCTACTGGCCATGGCATGGCCG	TGCAGCCTGCTACCTCAGGCTACGACTGCTACTGCCTACTGGCCATGGCATGGCCG	69	719689837	ENA|MKGO01000007|MKGO01000007.1 Triticum urartu cultivar G1812 chromosome 7, whole genome shotgun sequence.
SNP_1092610	ENA|MKGO01000007|MKGO01000007.1	96.429	56	2	0	1	56	341043360	341043305	1.5e-17	93.5	ENA|MKGO01000007|MKGO01000007.1	50	54	54	0	96.43	1	-1	TGCAGCCTGCTACCTCAGGCTGCGACTGCTACTGCCTACTGGCCATGGCATGGCCG	TGCAGCCTGCTACCTCAGGCTACAACTGCTACTGCCTACTGGCCATGGCATGGCCG	69	719689837	ENA|MKGO01000007|MKGO01000007.1 Triticum urartu cultivar G1812 chromosome 7, whole genome shotgun sequence.
SNP_1092610	ENA|MKGO01000004|MKGO01000004.1	98.214	56	0	1	1	56	243304243	243304189	1.16e-18	97.1	ENA|MKGO01000004|MKGO01000004.1	52	55	55	1	98.21	1	-1	TGCAGCCTGCTACCTCAGGCTGCGACTGCTACTGCCTACTGGCCATGGCATGGCCG	TGCAGCCTGCTACCTCAGGCTGCGACTGCTACTGCCTACTGGCCATGGCATG-CCG	69	619584425	ENA|MKGO01000004|MKGO01000004.1 Triticum urartu cultivar G1812 chromosome 4, whole genome shotgun sequence.
SNP_1092610	ENA|MKGO01000005|MKGO01000005.1	94.643	56	3	0	1	56	201938137	201938082	6.99e-16	87.9	ENA|MKGO01000005|MKGO01000005.1	47	53	53	0	94.64	1	-1	TGCAGCCTGCTACCTCAGGCTGCGACTGCTACTGCCTACTGGCCATGGCATGGCCG	TGCAGCCCGCTAGCTCAGGCTGCGACTGCTACTGCCTACTGGCCAAGGCATGGCCG	69	661480603	ENA|MKGO01000005|MKGO01000005.1 Triticum urartu cultivar G1812 chromosome 5, whole genome shotgun sequence.
SNP_1092690	ENA|MKGO01000002|MKGO01000002.1	98.551	69	0	1	1	69	4470234	4470301	6.9e-26	121	ENA|MKGO01000002|MKGO01000002.1	65	68	68	1	98.55	1	1	TGCAGGTGGGCCCCCCTCCTCCACGTCCTTCCAGAAACATCCACACCACTCGCCACTGCCCACTCCACT	TGCAGGTGGG-CCCCCTCCTCCACGTCCTTCCAGAAACATCCACACCACTCGCCACTGCCCACTCCACT	69	753719114	ENA|MKGO01000002|MKGO01000002.1 Triticum urartu cultivar G1812 chromosome 2, whole genome shotgun sequence.
SNP_1092690	ENA|MKGO01000002|MKGO01000002.1	98.551	69	0	1	1	69	4661053	4661120	6.9e-26	121	ENA|MKGO01000002|MKGO01000002.1	65	68	68	1	98.55	1	1	TGCAGGTGGGCCCCCCTCCTCCACGTCCTTCCAGAAACATCCACACCACTCGCCACTGCCCACTCCACT	TGCAGGTGGG-CCCCCTCCTCCACGTCCTTCCAGAAACATCCACACCACTCGCCACTGCCCACTCCACT	69	753719114	ENA|MKGO01000002|MKGO01000002.1 Triticum urartu cultivar G1812 chromosome 2, whole genome shotgun sequence.
SNP_1092756	ENA|MKGO01000003|MKGO01000003.1	98.387	62	1	0	8	69	6691650	6691589	1.49e-22	110	ENA|MKGO01000003|MKGO01000003.1	59	61	61	0	98.39	1	-1	GGCACTTGCGAGGCATCGCGGCTGGAGAATTCTGGGACCCGACGTGACGAGGTACGTACGTA	GGCACTTGCGAGGCATCGCGGCTGGAGAATTTTGGGACCCGACGTGACGAGGTACGTACGTA	69	747046674	ENA|MKGO01000003|MKGO01000003.1 Triticum urartu cultivar G1812 chromosome 3, whole genome shotgun sequence.
SNP_1092756	ENA|MKGO01000003|MKGO01000003.1	98.387	62	1	0	8	69	16087592	16087653	1.49e-22	110	ENA|MKGO01000003|MKGO01000003.1	59	61	61	0	98.39	1	1	GGCACTTGCGAGGCATCGCGGCTGGAGAATTCTGGGACCCGACGTGACGAGGTACGTACGTA	GGCACTTGCGAGGCATCGCGGCTGGAGAATTTTGGGACCCGACGTGACGAGGTACGTACGTA	69	747046674	ENA|MKGO01000003|MKGO01000003.1 Triticum urartu cultivar G1812 chromosome 3, whole genome shotgun sequence.
SNP_1092869	ENA|MKGO01000007|MKGO01000007.1	100	60	0	0	1	60	674037785	674037844	4.15e-23	111	ENA|MKGO01000007|MKGO01000007.1	60	60	60	0	100	1	1	TGCAGAAGAAGTGCCTGATGGCGGTCAAGTACGTGTTCCCCGTCCTGGAGTGGGTGCCCG	TGCAGAAGAAGTGCCTGATGGCGGTCAAGTACGTGTTCCCCGTCCTGGAGTGGGTGCCCG	69	719689837	ENA|MKGO01000007|MKGO01000007.1 Triticum urartu cultivar G1812 chromosome 7, whole genome shotgun sequence.
SNP_1092869	ENA|MKGO01000003|MKGO01000003.1	98.276	58	1	0	1	58	305072575	305072632	2.5e-20	102	ENA|MKGO01000003|MKGO01000003.1	55	57	57	0	98.28	1	1	TGCAGAAGAAGTGCCTGATGGCGGTCAAGTACGTGTTCCCCGTCCTGGAGTGGGTGCC	TGCAGAAGAAGTTCCTGATGGCGGTCAAGTACGTGTTCCCCGTCCTGGAGTGGGTGCC	69	747046674	ENA|MKGO01000003|MKGO01000003.1 Triticum urartu cultivar G1812 chromosome 3, whole genome shotgun sequence.
SNP_1093094	ENA|MKGO01000002|MKGO01000002.1	100	69	0	0	1	69	599684965	599685033	4.12e-28	128	ENA|MKGO01000002|MKGO01000002.1	69	69	69	0	100	1	1	TGCAGCGCCTCCCAGAAGGACGGCGCCGCCTCGTGCTCGTGCTCCTCGCGCGGCCGCTTCCCGAGGAGG	TGCAGCGCCTCCCAGAAGGACGGCGCCGCCTCGTGCTCGTGCTCCTCGCGCGGCCGCTTCCCGAGGAGG	69	753719114	ENA|MKGO01000002|MKGO01000002.1 Triticum urartu cultivar G1812 chromosome 2, whole genome shotgun sequence.
SNP_1093098	ENA|MKGO01005629|MKGO01005629.1	100	69	0	0	1	69	5780	5848	4.12e-28	128	ENA|MKGO01005629|MKGO01005629.1	69	69	69	0	100	1	1	TGCAGCCCGATCACATGCATGGCTCGCCTGATCGTCCCAAAAGGTCTCGGCGTGACGTGTCGCCGCGCC	TGCAGCCCGATCACATGCATGGCTCGCCTGATCGTCCCAAAAGGTCTCGGCGTGACGTGTCGCCGCGCC	69	8006	ENA|MKGO01005629|MKGO01005629.1 Triticum urartu cultivar G1812 TuUngrouped_contig_5921, whole genome shotgun sequence.
SNP_1093098	ENA|MKGO01000007|MKGO01000007.1	100	69	0	0	1	69	69826172	69826104	4.12e-28	128	ENA|MKGO01000007|MKGO01000007.1	69	69	69	0	100	1	-1	TGCAGCCCGATCACATGCATGGCTCGCCTGATCGTCCCAAAAGGTCTCGGCGTGACGTGTCGCCGCGCC	TGCAGCCCGATCACATGCATGGCTCGCCTGATCGTCCCAAAAGGTCTCGGCGTGACGTGTCGCCGCGCC	69	719689837	ENA|MKGO01000007|MKGO01000007.1 Triticum urartu cultivar G1812 chromosome 7, whole genome shotgun sequence.
SNP_1093315	ENA|MKGO01000005|MKGO01000005.1	100	69	0	0	1	69	21442824	21442892	4.12e-28	128	ENA|MKGO01000005|MKGO01000005.1	69	69	69	0	100	1	1	TGCAGGTGGTGGGGCTGGGCCTGGAGCGCGAGGCCTTGCATTACTACGGCAATCAGGCCACGGCGGTGA	TGCAGGTGGTGGGGCTGGGCCTGGAGCGCGAGGCCTTGCATTACTACGGCAATCAGGCCACGGCGGTGA	69	661480603	ENA|MKGO01000005|MKGO01000005.1 Triticum urartu cultivar G1812 chromosome 5, whole genome shotgun sequence.
SNP_1093603	ENA|MKGO01000006|MKGO01000006.1	100	69	0	0	1	69	388568901	388568969	4.12e-28	128	ENA|MKGO01000006|MKGO01000006.1	69	69	69	0	100	1	1	TGCAGGCCAACTCTCTGCTTCTTCCGAGGTCATACGGCGACGGCCATGGGCCGAGGGTGTCTGAAGGTT	TGCAGGCCAACTCTCTGCTTCTTCCGAGGTCATACGGCGACGGCCATGGGCCGAGGGTGTCTGAAGGTT	69	575865107	ENA|MKGO01000006|MKGO01000006.1 Triticum urartu cultivar G1812 chromosome 6, whole genome shotgun sequence.
SNP_1093701	ENA|MKGO01000006|MKGO01000006.1	100	69	0	0	1	69	575377148	575377080	4.12e-28	128	ENA|MKGO01000006|MKGO01000006.1	69	69	69	0	100	1	-1	TGCAGGTGGTCGTTGGTGGTGCTGTAGAGCGCCGACTGGTTGACCAGCGCCGCCGCATGCACGTGTTGG	TGCAGGTGGTCGTTGGTGGTGCTGTAGAGCGCCGACTGGTTGACCAGCGCCGCCGCATGCACGTGTTGG	69	575865107	ENA|MKGO01000006|MKGO01000006.1 Triticum urartu cultivar G1812 chromosome 6, whole genome shotgun sequence.
SNP_1093705	ENA|MKGO01000006|MKGO01000006.1	98.077	52	1	0	3	54	57740739	57740790	5.41e-17	91.6	ENA|MKGO01000006|MKGO01000006.1	49	51	51	0	98.08	1	1	CAGCGAAGGCTAAGCAGGTTTCCTCTGGCAGCCCATGGTATGGTGCTGACCG	CAGCGAAGGCTAAGCAGGTTTCCTCTGGCAGCCCATGGTATGGTGCTAACCG	69	575865107	ENA|MKGO01000006|MKGO01000006.1 Triticum urartu cultivar G1812 chromosome 6, whole genome shotgun sequence.
SNP_1093705	ENA|MKGO01000006|MKGO01000006.1	92.593	54	4	0	1	54	57920742	57920795	4.21e-13	78.7	ENA|MKGO01000006|MKGO01000006.1	42	50	50	0	92.59	1	1	TGCAGCGAAGGCTAAGCAGGTTTCCTCTGGCAGCCCATGGTATGGTGCTGACCG	TGCAGCGAAGGTGAAGCAGGTTTCCTCTGGCAGCCCATGGTACGGTGCCGACCG	69	575865107	ENA|MKGO01000006|MKGO01000006.1 Triticum urartu cultivar G1812 chromosome 6, whole genome shotgun sequence.
SNP_1094041	ENA|MKGO01000002|MKGO01000002.1	100	69	0	0	1	69	101182222	101182290	4.12e-28	128	ENA|MKGO01000002|MKGO01000002.1	69	69	69	0	100	1	1	TGCAGAAATCGGCGGCGCTCTCCTGTTCGCCCTCGCCGCCGCCGCGGCCCTCTTCGCCGCCGTCTCCAC	TGCAGAAATCGGCGGCGCTCTCCTGTTCGCCCTCGCCGCCGCCGCGGCCCTCTTCGCCGCCGTCTCCAC	69	753719114	ENA|MKGO01000002|MKGO01000002.1 Triticum urartu cultivar G1812 chromosome 2, whole genome shotgun sequence.
SNP_1094041	ENA|MKGO01000002|MKGO01000002.1	100	69	0	0	1	69	117146691	117146759	4.12e-28	128	ENA|MKGO01000002|MKGO01000002.1	69	69	69	0	100	1	1	TGCAGAAATCGGCGGCGCTCTCCTGTTCGCCCTCGCCGCCGCCGCGGCCCTCTTCGCCGCCGTCTCCAC	TGCAGAAATCGGCGGCGCTCTCCTGTTCGCCCTCGCCGCCGCCGCGGCCCTCTTCGCCGCCGTCTCCAC	69	753719114	ENA|MKGO01000002|MKGO01000002.1 Triticum urartu cultivar G1812 chromosome 2, whole genome shotgun sequence.
SNP_1094259	ENA|MKGO01000005|MKGO01000005.1	100	64	0	0	1	64	445425674	445425611	2.48e-25	119	ENA|MKGO01000005|MKGO01000005.1	64	64	64	0	100	1	-1	TGCAGGCGCCCGCCGCGCAGCGCACGTGCCGTGGTCACCCCCGCCGTGCCGTACCGCGGCGCCG	TGCAGGCGCCCGCCGCGCAGCGCACGTGCCGTGGTCACCCCCGCCGTGCCGTACCGCGGCGCCG	69	661480603	ENA|MKGO01000005|MKGO01000005.1 Triticum urartu cultivar G1812 chromosome 5, whole genome shotgun sequence.
SNP_1094393	ENA|MKGO01000001|MKGO01000001.1	100	69	0	0	1	69	59205355	59205287	4.12e-28	128	ENA|MKGO01000001|MKGO01000001.1	69	69	69	0	100	1	-1	TGCAGAAAAAGAACGCCAGCCTGGCCGCTCGCCGTGGCCTGGACGCCTGGCGCGTCATGGACCACGACG	TGCAGAAAAAGAACGCCAGCCTGGCCGCTCGCCGTGGCCTGGACGCCTGGCGCGTCATGGACCACGACG	69	584211917	ENA|MKGO01000001|MKGO01000001.1 Triticum urartu cultivar G1812 chromosome 1, whole genome shotgun sequence.
SNP_1094933	ENA|MKGO01000005|MKGO01000005.1	100	51	0	0	1	51	2890425	2890475	4.18e-18	95.3	ENA|MKGO01000005|MKGO01000005.1	51	51	51	0	100	1	1	TGCAGCAGCGGGATGGGGACGGGATCGTGTTGGCGTCGTCGGTGGTGACCG	TGCAGCAGCGGGATGGGGACGGGATCGTGTTGGCGTCGTCGGTGGTGACCG	69	661480603	ENA|MKGO01000005|MKGO01000005.1 Triticum urartu cultivar G1812 chromosome 5, whole genome shotgun sequence.
SNP_1095036	ENA|MKGO01000005|MKGO01000005.1	100	67	0	0	1	67	607997139	607997205	5.33e-27	124	ENA|MKGO01000005|MKGO01000005.1	67	67	67	0	100	1	1	TGCAGGCCATTGGAGTCCCCGCCACAGGCCGCGACGGCCGCCGCGGCGTCGGGCGAGCCGAGATCCG	TGCAGGCCATTGGAGTCCCCGCCACAGGCCGCGACGGCCGCCGCGGCGTCGGGCGAGCCGAGATCCG	69	661480603	ENA|MKGO01000005|MKGO01000005.1 Triticum urartu cultivar G1812 chromosome 5, whole genome shotgun sequence.
SNP_1095136	ENA|MKGO01000006|MKGO01000006.1	98.551	69	1	0	1	69	21201278	21201346	1.92e-26	122	ENA|MKGO01000006|MKGO01000006.1	66	68	68	0	98.55	1	1	TGCAGCACGAGGGTGACGACCTTGATCTCCGGGATGAAGTGGATCTCGTACCCGTCCTCCATCCTGAGA	TGCAGCACGAGGGTGGCGACCTTGATCTCCGGGATGAAGTGGATCTCGTACCCGTCCTCCATCCTGAGA	69	575865107	ENA|MKGO01000006|MKGO01000006.1 Triticum urartu cultivar G1812 chromosome 6, whole genome shotgun sequence.
SNP_1095481	ENA|MKGO01000005|MKGO01000005.1	100	69	0	0	1	69	452240737	452240669	4.12e-28	128	ENA|MKGO01000005|MKGO01000005.1	69	69	69	0	100	1	-1	TGCAGCGGAGGACGGAGGGGCGGTACCCCGAGCCGAGGCGCGGCACGGCGAGGGCGCTGTTCGTCGTCA	TGCAGCGGAGGACGGAGGGGCGGTACCCCGAGCCGAGGCGCGGCACGGCGAGGGCGCTGTTCGTCGTCA	69	661480603	ENA|MKGO01000005|MKGO01000005.1 Triticum urartu cultivar G1812 chromosome 5, whole genome shotgun sequence.
SNP_1095886	ENA|MKGO01000006|MKGO01000006.1	97.101	69	2	0	1	69	521059197	521059265	8.92e-25	117	ENA|MKGO01000006|MKGO01000006.1	63	67	67	0	97.1	1	1	TGCAGAGGCACTCCTCCCGGCCGGTGCCGCTGCACGTGGAGCAACGGGGCCGCGCGTCCCATCTGGACG	TGCAGAGGCACTCCTCCCGGCCGGTGCCGCTGCACGTGGAGCAACGGGGCCGCGCGTTCCACCTGGACG	69	575865107	ENA|MKGO01000006|MKGO01000006.1 Triticum urartu cultivar G1812 chromosome 6, whole genome shotgun sequence.
SNP_1095886	ENA|MKGO01000006|MKGO01000006.1	95.652	69	3	0	1	69	521067021	521067089	4.15e-23	111	ENA|MKGO01000006|MKGO01000006.1	60	66	66	0	95.65	1	1	TGCAGAGGCACTCCTCCCGGCCGGTGCCGCTGCACGTGGAGCAACGGGGCCGCGCGTCCCATCTGGACG	TGCAGAGGCACTCCTCCCGGCCGGTGCCGCTGCACGTGGAGCAACGGGGCCGTGTGTCCCACCTGGACG	69	575865107	ENA|MKGO01000006|MKGO01000006.1 Triticum urartu cultivar G1812 chromosome 6, whole genome shotgun sequence.
SNP_1095886	ENA|MKGO01000006|MKGO01000006.1	95.652	69	3	0	1	69	521070968	521071036	4.15e-23	111	ENA|MKGO01000006|MKGO01000006.1	60	66	66	0	95.65	1	1	TGCAGAGGCACTCCTCCCGGCCGGTGCCGCTGCACGTGGAGCAACGGGGCCGCGCGTCCCATCTGGACG	TGCAGAGGCACTCCTCCCGGCCGGTGCCGCTGCACGTGGAGCAGCGTGGCCGCGCGTCCCACCTGGACG	69	575865107	ENA|MKGO01000006|MKGO01000006.1 Triticum urartu cultivar G1812 chromosome 6, whole genome shotgun sequence.
SNP_1096302	ENA|MKGO01000001|MKGO01000001.1	100	69	0	0	1	69	11791394	11791462	4.12e-28	128	ENA|MKGO01000001|MKGO01000001.1	69	69	69	0	100	1	1	TGCAGGGTGGTGTTGGCGCCGTTGACGAGGCAGCGCTCCTACGGCAACGTGCCACAGCCGCACGCCGCC	TGCAGGGTGGTGTTGGCGCCGTTGACGAGGCAGCGCTCCTACGGCAACGTGCCACAGCCGCACGCCGCC	69	584211917	ENA|MKGO01000001|MKGO01000001.1 Triticum urartu cultivar G1812 chromosome 1, whole genome shotgun sequence.
SNP_1096302	ENA|MKGO01000001|MKGO01000001.1	96.774	62	2	0	1	62	11807137	11807198	6.94e-21	104	ENA|MKGO01000001|MKGO01000001.1	56	60	60	0	96.77	1	1	TGCAGGGTGGTGTTGGCGCCGTTGACGAGGCAGCGCTCCTACGGCAACGTGCCACAGCCGCA	TGCAGGGTGGTGTTGGCGCCGTTGACGAGGCAGCGCTCCTATGGCAACGTGCCGCAGCCGCA	69	584211917	ENA|MKGO01000001|MKGO01000001.1 Triticum urartu cultivar G1812 chromosome 1, whole genome shotgun sequence.
SNP_1096787	ENA|MKGO01000005|MKGO01000005.1	100	69	0	0	1	69	453772208	453772140	4.12e-28	128	ENA|MKGO01000005|MKGO01000005.1	69	69	69	0	100	1	-1	TGCAGCTTGCCACGACCGATTATCACCAACGACTGACAAGCCACGCCCCATTTTGGGCTGCCCTGCGCG	TGCAGCTTGCCACGACCGATTATCACCAACGACTGACAAGCCACGCCCCATTTTGGGCTGCCCTGCGCG	69	661480603	ENA|MKGO01000005|MKGO01000005.1 Triticum urartu cultivar G1812 chromosome 5, whole genome shotgun sequence.
SNP_1098619	ENA|MKGO01000005|MKGO01000005.1	100	69	0	0	1	69	620472828	620472760	4.12e-28	128	ENA|MKGO01000005|MKGO01000005.1	69	69	69	0	100	1	-1	TGCAGCACCGTGGCGTTGCGGGGGAGGAACACCATGTTGGCGAGCCCAGCCCCATGCACGCCCACCATC	TGCAGCACCGTGGCGTTGCGGGGGAGGAACACCATGTTGGCGAGCCCAGCCCCATGCACGCCCACCATC	69	661480603	ENA|MKGO01000005|MKGO01000005.1 Triticum urartu cultivar G1812 chromosome 5, whole genome shotgun sequence.
SNP_1099301	ENA|MKGO01000007|MKGO01000007.1	100	53	0	0	1	53	665042063	665042115	3.23e-19	99	ENA|MKGO01000007|MKGO01000007.1	53	53	53	0	100	1	1	TGCAGAGAACTGACAGGTCCAAGTCTTGGGCTGAGTTCAAAATTTCAGTCCCG	TGCAGAGAACTGACAGGTCCAAGTCTTGGGCTGAGTTCAAAATTTCAGTCCCG	69	719689837	ENA|MKGO01000007|MKGO01000007.1 Triticum urartu cultivar G1812 chromosome 7, whole genome shotgun sequence.
SNP_1099509	ENA|MKGO01000005|MKGO01000005.1	100	69	0	0	1	69	585873766	585873698	4.12e-28	128	ENA|MKGO01000005|MKGO01000005.1	69	69	69	0	100	1	-1	TGCAGCATCAATCAACATTACTAGTAACCATCTTTGGCACTGACGATGATGGCTCACACCTAGAGGTAG	TGCAGCATCAATCAACATTACTAGTAACCATCTTTGGCACTGACGATGATGGCTCACACCTAGAGGTAG	69	661480603	ENA|MKGO01000005|MKGO01000005.1 Triticum urartu cultivar G1812 chromosome 5, whole genome shotgun sequence.
SNP_1099653	ENA|MKGO01000005|MKGO01000005.1	100	69	0	0	1	69	474589943	474589875	4.12e-28	128	ENA|MKGO01000005|MKGO01000005.1	69	69	69	0	100	1	-1	TGCAGGTTATTATCTTTATTATCTAGCCGCGCGCGTTGATTAGCACTTGAAACAGAGGCTCATCAAGCA	TGCAGGTTATTATCTTTATTATCTAGCCGCGCGCGTTGATTAGCACTTGAAACAGAGGCTCATCAAGCA	69	661480603	ENA|MKGO01000005|MKGO01000005.1 Triticum urartu cultivar G1812 chromosome 5, whole genome shotgun sequence.
SNP_1099773	ENA|MKGO01000006|MKGO01000006.1	96.154	52	2	0	1	52	562373176	562373227	2.52e-15	86.1	ENA|MKGO01000006|MKGO01000006.1	46	50	50	0	96.15	1	1	TGCAGCCACGATTGCCAAATGTGACACTCTATGCGTCCATAGACAACAACCG	TGCAGCCACGATTGCTAAATGTGACACTCTATGCGTCCATAGACAACAGCCG	69	575865107	ENA|MKGO01000006|MKGO01000006.1 Triticum urartu cultivar G1812 chromosome 6, whole genome shotgun sequence.
SNP_1100259	ENA|MKGO01000001|MKGO01000001.1	100	69	0	0	1	69	56749075	56749143	4.12e-28	128	ENA|MKGO01000001|MKGO01000001.1	69	69	69	0	100	1	1	TGCAGGCAATTGGGTTTCCTTTTTTCTTTTTCTCATTTAAGTTTATTTCAATGGGGAAGAAACAAAACC	TGCAGGCAATTGGGTTTCCTTTTTTCTTTTTCTCATTTAAGTTTATTTCAATGGGGAAGAAACAAAACC	69	584211917	ENA|MKGO01000001|MKGO01000001.1 Triticum urartu cultivar G1812 chromosome 1, whole genome shotgun sequence.
SNP_1100599	ENA|MKGO01000006|MKGO01000006.1	98.551	69	1	0	1	69	563446986	563446918	1.92e-26	122	ENA|MKGO01000006|MKGO01000006.1	66	68	68	0	98.55	1	-1	TGCAGGTGAGAGATGTCACCACTGAACCAAGATGCAACAGCCCGTGACCAAGTCGCGCACATATGCATC	TGCAGGTGAGAGATGTCACCACTGAACCAAGATGCAACAGCCCGTGACCAAGTCGCGTACATATGCATC	69	575865107	ENA|MKGO01000006|MKGO01000006.1 Triticum urartu cultivar G1812 chromosome 6, whole genome shotgun sequence.
SNP_1100672	ENA|MKGO01000003|MKGO01000003.1	100	69	0	0	1	69	21823257	21823189	4.12e-28	128	ENA|MKGO01000003|MKGO01000003.1	69	69	69	0	100	1	-1	TGCAGTAGCGTGTGTATGAGTTTATCAGGCTTCAGAGTTGTGGCATAGATCAGATCAGGATTGTTGTGA	TGCAGTAGCGTGTGTATGAGTTTATCAGGCTTCAGAGTTGTGGCATAGATCAGATCAGGATTGTTGTGA	69	747046674	ENA|MKGO01000003|MKGO01000003.1 Triticum urartu cultivar G1812 chromosome 3, whole genome shotgun sequence.
SNP_1100699	ENA|MKGO01000002|MKGO01000002.1	100	69	0	0	1	69	40779695	40779763	4.12e-28	128	ENA|MKGO01000002|MKGO01000002.1	69	69	69	0	100	1	1	TGCAGCATGGTGGCCCTGTGGTTCCAAGTATAATTCTTCAAATTGAAACGAGGGTTCAGAAGATGGACT	TGCAGCATGGTGGCCCTGTGGTTCCAAGTATAATTCTTCAAATTGAAACGAGGGTTCAGAAGATGGACT	69	753719114	ENA|MKGO01000002|MKGO01000002.1 Triticum urartu cultivar G1812 chromosome 2, whole genome shotgun sequence.
SNP_1100749	ENA|MKGO01000005|MKGO01000005.1	100	69	0	0	1	69	516751433	516751365	4.12e-28	128	ENA|MKGO01000005|MKGO01000005.1	69	69	69	0	100	1	-1	TGCAGCCTGATTCGCGCGGGCAATGATGACGCCACCAGGCCCTGCATGATAATCTCTGCATGCAGTCGC	TGCAGCCTGATTCGCGCGGGCAATGATGACGCCACCAGGCCCTGCATGATAATCTCTGCATGCAGTCGC	69	661480603	ENA|MKGO01000005|MKGO01000005.1 Triticum urartu cultivar G1812 chromosome 5, whole genome shotgun sequence.
SNP_1100820	ENA|MKGO01000003|MKGO01000003.1	100	69	0	0	1	69	49876490	49876558	4.12e-28	128	ENA|MKGO01000003|MKGO01000003.1	69	69	69	0	100	1	1	TGCAGATTCAGTAATACAACCTCGTAGTTTTATTATCATTCACTAGTTCCAGTGCGCACATTTGTGACC	TGCAGATTCAGTAATACAACCTCGTAGTTTTATTATCATTCACTAGTTCCAGTGCGCACATTTGTGACC	69	747046674	ENA|MKGO01000003|MKGO01000003.1 Triticum urartu cultivar G1812 chromosome 3, whole genome shotgun sequence.
SNP_1100820	ENA|MKGO01000003|MKGO01000003.1	100	69	0	0	1	69	50359860	50359928	4.12e-28	128	ENA|MKGO01000003|MKGO01000003.1	69	69	69	0	100	1	1	TGCAGATTCAGTAATACAACCTCGTAGTTTTATTATCATTCACTAGTTCCAGTGCGCACATTTGTGACC	TGCAGATTCAGTAATACAACCTCGTAGTTTTATTATCATTCACTAGTTCCAGTGCGCACATTTGTGACC	69	747046674	ENA|MKGO01000003|MKGO01000003.1 Triticum urartu cultivar G1812 chromosome 3, whole genome shotgun sequence.
SNP_1100850	ENA|MKGO01000002|MKGO01000002.1	100	69	0	0	1	69	738359267	738359335	4.12e-28	128	ENA|MKGO01000002|MKGO01000002.1	69	69	69	0	100	1	1	TGCAGAGTGAGAAAGATGGCGTCCAAAGCAGCAGCGGCACTTGTCATCCTGGCCTTGGCCTGCGCGGCC	TGCAGAGTGAGAAAGATGGCGTCCAAAGCAGCAGCGGCACTTGTCATCCTGGCCTTGGCCTGCGCGGCC	69	753719114	ENA|MKGO01000002|MKGO01000002.1 Triticum urartu cultivar G1812 chromosome 2, whole genome shotgun sequence.
SNP_1101448	ENA|MKGO01000002|MKGO01000002.1	100	69	0	0	1	69	35098468	35098400	4.12e-28	128	ENA|MKGO01000002|MKGO01000002.1	69	69	69	0	100	1	-1	TGCAGGTGGTGCATGCGGGTACCAGCGCGACGTGGAGAAGCCGCCGTTCTCCGCCATGATCACGGCGGG	TGCAGGTGGTGCATGCGGGTACCAGCGCGACGTGGAGAAGCCGCCGTTCTCCGCCATGATCACGGCGGG	69	753719114	ENA|MKGO01000002|MKGO01000002.1 Triticum urartu cultivar G1812 chromosome 2, whole genome shotgun sequence.
SNP_1101448	ENA|MKGO01000002|MKGO01000002.1	95.652	69	3	0	1	69	35105944	35105876	4.15e-23	111	ENA|MKGO01000002|MKGO01000002.1	60	66	66	0	95.65	1	-1	TGCAGGTGGTGCATGCGGGTACCAGCGCGACGTGGAGAAGCCGCCGTTCTCCGCCATGATCACGGCGGG	TGCAGGTGGTGCGTGCGGGTACCAAGGCGACGTGGAGAAGCCGCCGTTCTCCGCCATGATCACGGCGGG	69	753719114	ENA|MKGO01000002|MKGO01000002.1 Triticum urartu cultivar G1812 chromosome 2, whole genome shotgun sequence.
SNP_1101448	ENA|MKGO01000002|MKGO01000002.1	95.652	69	3	0	1	69	741346416	741346348	4.15e-23	111	ENA|MKGO01000002|MKGO01000002.1	60	66	66	0	95.65	1	-1	TGCAGGTGGTGCATGCGGGTACCAGCGCGACGTGGAGAAGCCGCCGTTCTCCGCCATGATCACGGCGGG	TGCAGGTGGTGCGTGCGGGTACCAGCGCGACGTGGAGAGCCCGCCGTTCTCCGCCATGATCACGGCGGG	69	753719114	ENA|MKGO01000002|MKGO01000002.1 Triticum urartu cultivar G1812 chromosome 2, whole genome shotgun sequence.
SNP_1101448	ENA|MKGO01000002|MKGO01000002.1	94.203	69	4	0	1	69	35070676	35070744	1.93e-21	106	ENA|MKGO01000002|MKGO01000002.1	57	65	65	0	94.2	1	1	TGCAGGTGGTGCATGCGGGTACCAGCGCGACGTGGAGAAGCCGCCGTTCTCCGCCATGATCACGGCGGG	TGCAGGTGGTGCGTGCGGGTACCATGGCGACGTGGAGCAGCCGCCGTTCTCCGCCATGATCACGGCGGG	69	753719114	ENA|MKGO01000002|MKGO01000002.1 Triticum urartu cultivar G1812 chromosome 2, whole genome shotgun sequence.
SNP_1101448	ENA|MKGO01000002|MKGO01000002.1	92.754	69	5	0	1	69	741352827	741352759	8.98e-20	100	ENA|MKGO01000002|MKGO01000002.1	54	64	64	0	92.75	1	-1	TGCAGGTGGTGCATGCGGGTACCAGCGCGACGTGGAGAAGCCGCCGTTCTCCGCCATGATCACGGCGGG	TGCAGGAGGAGCATGCGGGTACCAGCGCGACGTGGAGAGCCCGCCGTTCTCCGCCATGATCACGGCCGG	69	753719114	ENA|MKGO01000002|MKGO01000002.1 Triticum urartu cultivar G1812 chromosome 2, whole genome shotgun sequence.
SNP_1101481	ENA|MKGO01000002|MKGO01000002.1	100	69	0	0	1	69	243011371	243011439	4.12e-28	128	ENA|MKGO01000002|MKGO01000002.1	69	69	69	0	100	1	1	TGCAGGAGCAGGTGATTGTTGCAACGATTTTCTTTCTTCTTGTTTTGTGTATGATGATGTACATTGTGG	TGCAGGAGCAGGTGATTGTTGCAACGATTTTCTTTCTTCTTGTTTTGTGTATGATGATGTACATTGTGG	69	753719114	ENA|MKGO01000002|MKGO01000002.1 Triticum urartu cultivar G1812 chromosome 2, whole genome shotgun sequence.
SNP_1101481	ENA|MKGO01000002|MKGO01000002.1	100	69	0	0	1	69	243836068	243836136	4.12e-28	128	ENA|MKGO01000002|MKGO01000002.1	69	69	69	0	100	1	1	TGCAGGAGCAGGTGATTGTTGCAACGATTTTCTTTCTTCTTGTTTTGTGTATGATGATGTACATTGTGG	TGCAGGAGCAGGTGATTGTTGCAACGATTTTCTTTCTTCTTGTTTTGTGTATGATGATGTACATTGTGG	69	753719114	ENA|MKGO01000002|MKGO01000002.1 Triticum urartu cultivar G1812 chromosome 2, whole genome shotgun sequence.
SNP_1101516	ENA|MKGO01000003|MKGO01000003.1	93.103	58	4	0	1	58	12471821	12471764	2.52e-15	86.1	ENA|MKGO01000003|MKGO01000003.1	46	54	54	0	93.1	1	-1	TGCAGCCTGTTTCAGGGCAGAAACATGGTGCATGTGGGCAACCTTTCTCGTGTTCTTC	TGCAGCCGGTTTCAGGGCAGAAACATGGTGCATGTGGACAACCTTTCTCATGGTCTTC	69	747046674	ENA|MKGO01000003|MKGO01000003.1 Triticum urartu cultivar G1812 chromosome 3, whole genome shotgun sequence.
SNP_1101847	ENA|MKGO01000003|MKGO01000003.1	98.551	69	1	0	1	69	40967659	40967591	1.92e-26	122	ENA|MKGO01000003|MKGO01000003.1	66	68	68	0	98.55	1	-1	TGCAGGCAGATTGGAGTTGTAGGAGTAAAGAGGACAGGAGCAGAAAAGCAGGAAAGAGTGGGGAAGAAG	TGCAGGCAGATTGGAGTTGTAGGAGTAAAGAGGACAGGAGCAGAAAAGCAGGAGAGAGTGGGGAAGAAG	69	747046674	ENA|MKGO01000003|MKGO01000003.1 Triticum urartu cultivar G1812 chromosome 3, whole genome shotgun sequence.
SNP_1102928	ENA|MKGO01000005|MKGO01000005.1	100	69	0	0	1	69	54179572	54179504	4.12e-28	128	ENA|MKGO01000005|MKGO01000005.1	69	69	69	0	100	1	-1	TGCAGTGCTGGTCTTCACGACAAACTGGGGGAACTTGCTAGGAAAAATGCTTTGAAGGTGCAGCCATGT	TGCAGTGCTGGTCTTCACGACAAACTGGGGGAACTTGCTAGGAAAAATGCTTTGAAGGTGCAGCCATGT	69	661480603	ENA|MKGO01000005|MKGO01000005.1 Triticum urartu cultivar G1812 chromosome 5, whole genome shotgun sequence.
SNP_1103392	ENA|MKGO01000002|MKGO01000002.1	100	59	0	0	1	59	694236718	694236776	1.49e-22	110	ENA|MKGO01000002|MKGO01000002.1	59	59	59	0	100	1	1	TGCAGCCACACCCTGGTGATCTCGTCGGAGAAGAGGTGGCGCTTGGCGTCAGCCTCCCG	TGCAGCCACACCCTGGTGATCTCGTCGGAGAAGAGGTGGCGCTTGGCGTCAGCCTCCCG	69	753719114	ENA|MKGO01000002|MKGO01000002.1 Triticum urartu cultivar G1812 chromosome 2, whole genome shotgun sequence.
SNP_1103392	ENA|MKGO01000002|MKGO01000002.1	100	59	0	0	1	59	694711101	694711159	1.49e-22	110	ENA|MKGO01000002|MKGO01000002.1	59	59	59	0	100	1	1	TGCAGCCACACCCTGGTGATCTCGTCGGAGAAGAGGTGGCGCTTGGCGTCAGCCTCCCG	TGCAGCCACACCCTGGTGATCTCGTCGGAGAAGAGGTGGCGCTTGGCGTCAGCCTCCCG	69	753719114	ENA|MKGO01000002|MKGO01000002.1 Triticum urartu cultivar G1812 chromosome 2, whole genome shotgun sequence.
SNP_1103398	ENA|MKGO01000006|MKGO01000006.1	100	69	0	0	1	69	183191274	183191342	4.12e-28	128	ENA|MKGO01000006|MKGO01000006.1	69	69	69	0	100	1	1	TGCAGGCGCCAGGACCGCGAATCTCCCGAGCCGAGCATGTGTAGTGAAAATGTGAGATAAAGAGGTAAT	TGCAGGCGCCAGGACCGCGAATCTCCCGAGCCGAGCATGTGTAGTGAAAATGTGAGATAAAGAGGTAAT	69	575865107	ENA|MKGO01000006|MKGO01000006.1 Triticum urartu cultivar G1812 chromosome 6, whole genome shotgun sequence.
SNP_1103958	ENA|MKGO01000007|MKGO01000007.1	100	69	0	0	1	69	69450542	69450474	4.12e-28	128	ENA|MKGO01000007|MKGO01000007.1	69	69	69	0	100	1	-1	TGCAGGTTCTCGGCCGCAAAGCATGGGCAAAGAAGATGCGGCCGAGCGGGCGAGCATCTGCATGCATGC	TGCAGGTTCTCGGCCGCAAAGCATGGGCAAAGAAGATGCGGCCGAGCGGGCGAGCATCTGCATGCATGC	69	719689837	ENA|MKGO01000007|MKGO01000007.1 Triticum urartu cultivar G1812 chromosome 7, whole genome shotgun sequence.
SNP_1104182	ENA|MKGO01000418|MKGO01000418.1	100	69	0	0	1	69	35499	35431	4.12e-28	128	ENA|MKGO01000418|MKGO01000418.1	69	69	69	0	100	1	-1	TGCAGCACTGAGCACAGTTTCTTTCCATTCAGGGAAAGTGCACGCACGCGCCTAGACCCCCTGTCACGT	TGCAGCACTGAGCACAGTTTCTTTCCATTCAGGGAAAGTGCACGCACGCGCCTAGACCCCCTGTCACGT	69	99113	ENA|MKGO01000418|MKGO01000418.1 Triticum urartu cultivar G1812 TuUngrouped_contig_518, whole genome shotgun sequence.
SNP_1104182	ENA|MKGO01000002|MKGO01000002.1	100	69	0	0	1	69	118658176	118658244	4.12e-28	128	ENA|MKGO01000002|MKGO01000002.1	69	69	69	0	100	1	1	TGCAGCACTGAGCACAGTTTCTTTCCATTCAGGGAAAGTGCACGCACGCGCCTAGACCCCCTGTCACGT	TGCAGCACTGAGCACAGTTTCTTTCCATTCAGGGAAAGTGCACGCACGCGCCTAGACCCCCTGTCACGT	69	753719114	ENA|MKGO01000002|MKGO01000002.1 Triticum urartu cultivar G1812 chromosome 2, whole genome shotgun sequence.
SNP_1104382	ENA|MKGO01000002|MKGO01000002.1	100	53	0	0	1	53	530947012	530947064	3.23e-19	99	ENA|MKGO01000002|MKGO01000002.1	53	53	53	0	100	1	1	TGCAGCACGTCAGGGGAGTTGAGTCGCCCCGCCGCCTACACTAAAGTTCACCG	TGCAGCACGTCAGGGGAGTTGAGTCGCCCCGCCGCCTACACTAAAGTTCACCG	69	753719114	ENA|MKGO01000002|MKGO01000002.1 Triticum urartu cultivar G1812 chromosome 2, whole genome shotgun sequence.
SNP_1104964	ENA|MKGO01000006|MKGO01000006.1	100	69	0	0	1	69	47023506	47023438	4.12e-28	128	ENA|MKGO01000006|MKGO01000006.1	69	69	69	0	100	1	-1	TGCAGGTCCTGATTATTTGCTCCAGCCCATCAGCCGTGAAAACCGTGTGCAAATTTGTGCTAGTTTTGA	TGCAGGTCCTGATTATTTGCTCCAGCCCATCAGCCGTGAAAACCGTGTGCAAATTTGTGCTAGTTTTGA	69	575865107	ENA|MKGO01000006|MKGO01000006.1 Triticum urartu cultivar G1812 chromosome 6, whole genome shotgun sequence.
SNP_1105577	ENA|MKGO01000002|MKGO01000002.1	100	69	0	0	1	69	737395676	737395608	4.12e-28	128	ENA|MKGO01000002|MKGO01000002.1	69	69	69	0	100	1	-1	TGCAGAAACAATGGAGGCAGAGAGGATGGATTCCGTAAGAACACGAGCACAACCACCACAATACATACA	TGCAGAAACAATGGAGGCAGAGAGGATGGATTCCGTAAGAACACGAGCACAACCACCACAATACATACA	69	753719114	ENA|MKGO01000002|MKGO01000002.1 Triticum urartu cultivar G1812 chromosome 2, whole genome shotgun sequence.
SNP_1105702	ENA|MKGO01000005|MKGO01000005.1	100	69	0	0	1	69	578241692	578241624	4.12e-28	128	ENA|MKGO01000005|MKGO01000005.1	69	69	69	0	100	1	-1	TGCAGAACCAAAGTTTTTTAGAGAAGCCAACAACACACTACCATGCAGGAGCACTAGGTGGGTTGTGAC	TGCAGAACCAAAGTTTTTTAGAGAAGCCAACAACACACTACCATGCAGGAGCACTAGGTGGGTTGTGAC	69	661480603	ENA|MKGO01000005|MKGO01000005.1 Triticum urartu cultivar G1812 chromosome 5, whole genome shotgun sequence.
SNP_1106195	ENA|MKGO01000002|MKGO01000002.1	98.551	69	1	0	1	69	153554935	153555003	1.92e-26	122	ENA|MKGO01000002|MKGO01000002.1	66	68	68	0	98.55	1	1	TGCAGTGCGAGTACAGGCACTACCTCTTCGCCTGGAGGTTTCGCGCCGCCGATGCATCATCGCCCGCCG	TGCAGTGCGAGTACAGGCACTACCTCTTCGCCTGGAGGTTTCGGGCCGCCGATGCATCATCGCCCGCCG	69	753719114	ENA|MKGO01000002|MKGO01000002.1 Triticum urartu cultivar G1812 chromosome 2, whole genome shotgun sequence.
SNP_1106259	ENA|MKGO01005720|MKGO01005720.1	100	69	0	0	1	69	2808	2876	4.12e-28	128	ENA|MKGO01005720|MKGO01005720.1	69	69	69	0	100	1	1	TGCAGTTATACAGAAAAGTTGGCAAGTAGTCTAACATTGTTGTGTAACCACTGACGAAGTTACGTATTA	TGCAGTTATACAGAAAAGTTGGCAAGTAGTCTAACATTGTTGTGTAACCACTGACGAAGTTACGTATTA	69	14717	ENA|MKGO01005720|MKGO01005720.1 Triticum urartu cultivar G1812 TuUngrouped_contig_6012, whole genome shotgun sequence.
SNP_1106731	ENA|MKGO01000005|MKGO01000005.1	100	69	0	0	1	69	571547083	571547151	4.12e-28	128	ENA|MKGO01000005|MKGO01000005.1	69	69	69	0	100	1	1	TGCAGCGACCCATCCACCCACCTCTTCTGGGACGGCATCCATTACACCGAGGCCGCCAACAAGTACATC	TGCAGCGACCCATCCACCCACCTCTTCTGGGACGGCATCCATTACACCGAGGCCGCCAACAAGTACATC	69	661480603	ENA|MKGO01000005|MKGO01000005.1 Triticum urartu cultivar G1812 chromosome 5, whole genome shotgun sequence.
SNP_1107797	ENA|MKGO01000007|MKGO01000007.1	98.305	59	0	1	1	59	17458408	17458351	2.5e-20	102	ENA|MKGO01000007|MKGO01000007.1	55	58	58	1	98.31	1	-1	TGCAGCCACCTTATCCAACTATTGTACGTATCTGGTCAGCAAGGATCTGGTGCCGAGAT	TGCAGCCACCTTATCCAACTATTGTACGTATCTGGTCAGCAAGGATCTGGTGCCG-GAT	69	719689837	ENA|MKGO01000007|MKGO01000007.1 Triticum urartu cultivar G1812 chromosome 7, whole genome shotgun sequence.
SNP_1107831	ENA|MKGO01000007|MKGO01000007.1	100	69	0	0	1	69	71500736	71500804	4.12e-28	128	ENA|MKGO01000007|MKGO01000007.1	69	69	69	0	100	1	1	TGCAGTAGGAGGAGGGAATAAACAAGGGGCGCCACCGCGCGGGCCGAGGCGAGGGATAGGGGGAAAAGT	TGCAGTAGGAGGAGGGAATAAACAAGGGGCGCCACCGCGCGGGCCGAGGCGAGGGATAGGGGGAAAAGT	69	719689837	ENA|MKGO01000007|MKGO01000007.1 Triticum urartu cultivar G1812 chromosome 7, whole genome shotgun sequence.
SNP_1108256	ENA|MKGO01000002|MKGO01000002.1	93.333	45	1	1	1	43	655221717	655221673	3.28e-09	65.8	ENA|MKGO01000002|MKGO01000002.1	35	42	42	2	93.33	1	-1	TGCAGGTCACTGATCCAACACTACATAGACA--TGTTAACTGATT	TGCAGGTCACTGATCCAACACTACATAGACACATGTTAATTGATT	69	753719114	ENA|MKGO01000002|MKGO01000002.1 Triticum urartu cultivar G1812 chromosome 2, whole genome shotgun sequence.
SNP_1108682	ENA|MKGO01000005|MKGO01000005.1	100	69	0	0	1	69	578036581	578036513	4.12e-28	128	ENA|MKGO01000005|MKGO01000005.1	69	69	69	0	100	1	-1	TGCAGAAGGTGCCCTCGCAGCGGCACAGGAACCCCAGCAACCCCACCTTCTTGCGGCACGCCGCGCACC	TGCAGAAGGTGCCCTCGCAGCGGCACAGGAACCCCAGCAACCCCACCTTCTTGCGGCACGCCGCGCACC	69	661480603	ENA|MKGO01000005|MKGO01000005.1 Triticum urartu cultivar G1812 chromosome 5, whole genome shotgun sequence.
SNP_1108682	ENA|MKGO01000005|MKGO01000005.1	95.652	69	3	0	1	69	578042031	578041963	4.15e-23	111	ENA|MKGO01000005|MKGO01000005.1	60	66	66	0	95.65	1	-1	TGCAGAAGGTGCCCTCGCAGCGGCACAGGAACCCCAGCAACCCCACCTTCTTGCGGCACGCCGCGCACC	TGCAGAAGGTGCCCTCGCAGCGGCAGCGGAACCCCAGCAGCCCCACCTTCTTGCGGCACGCCGCGCACC	69	661480603	ENA|MKGO01000005|MKGO01000005.1 Triticum urartu cultivar G1812 chromosome 5, whole genome shotgun sequence.
SNP_1109817	ENA|MKGO01000005|MKGO01000005.1	100	69	0	0	1	69	580821644	580821576	4.12e-28	128	ENA|MKGO01000005|MKGO01000005.1	69	69	69	0	100	1	-1	TGCAGCAAGGGCATCACGAGGACCTGTAACTGTCAGTGAAGTTACTGAAGGTACCGAACACATCATAAC	TGCAGCAAGGGCATCACGAGGACCTGTAACTGTCAGTGAAGTTACTGAAGGTACCGAACACATCATAAC	69	661480603	ENA|MKGO01000005|MKGO01000005.1 Triticum urartu cultivar G1812 chromosome 5, whole genome shotgun sequence.
SNP_1110288	ENA|MKGO01007221|MKGO01007221.1	100	69	0	0	1	69	19440	19372	4.12e-28	128	ENA|MKGO01007221|MKGO01007221.1	69	69	69	0	100	1	-1	TGCAGGTAAGTTTATACTGGGGTTGGGGGTGGGAGCGAGCAGGGGGACGGAACGGGGCCAGAGCCAACG	TGCAGGTAAGTTTATACTGGGGTTGGGGGTGGGAGCGAGCAGGGGGACGGAACGGGGCCAGAGCCAACG	69	20422	ENA|MKGO01007221|MKGO01007221.1 Triticum urartu cultivar G1812 TuUngrouped_contig_7518, whole genome shotgun sequence.
SNP_1111343	ENA|MKGO01000005|MKGO01000005.1	98.551	69	1	0	1	69	519135641	519135573	1.92e-26	122	ENA|MKGO01000005|MKGO01000005.1	66	68	68	0	98.55	1	-1	TGCAGTTTTGGAGGTGCCGTGATGTGATCTAGATCAGGTCTGCTGGGGCCAAGTGTTTGCCACTTGCCG	TGCAGTTTTGAAGGTGCCGTGATGTGATCTAGATCAGGTCTGCTGGGGCCAAGTGTTTGCCACTTGCCG	69	661480603	ENA|MKGO01000005|MKGO01000005.1 Triticum urartu cultivar G1812 chromosome 5, whole genome shotgun sequence.
SNP_1111343	ENA|MKGO01000005|MKGO01000005.1	97.015	67	2	0	1	67	518529194	518529260	1.15e-23	113	ENA|MKGO01000005|MKGO01000005.1	61	65	65	0	97.01	1	1	TGCAGTTTTGGAGGTGCCGTGATGTGATCTAGATCAGGTCTGCTGGGGCCAAGTGTTTGCCACTTGC	TGCAGTTTTGGAGGTGCCGTGATGTGATCTGGATCAGGTCTGCTGGGGCCAAGTGTTTGGCACTTGC	69	661480603	ENA|MKGO01000005|MKGO01000005.1 Triticum urartu cultivar G1812 chromosome 5, whole genome shotgun sequence.
SNP_1111845	ENA|MKGO01005032|MKGO01005032.1	100	69	0	0	1	69	7962	7894	4.12e-28	128	ENA|MKGO01005032|MKGO01005032.1	69	69	69	0	100	1	-1	TGCAGGTCACACCGTTTCTTGCTTCACAACCGCCCCCACTCCATTCCAAGTTCCCGGCGGCGACTGCGC	TGCAGGTCACACCGTTTCTTGCTTCACAACCGCCCCCACTCCATTCCAAGTTCCCGGCGGCGACTGCGC	69	28596	ENA|MKGO01005032|MKGO01005032.1 Triticum urartu cultivar G1812 TuUngrouped_contig_5323, whole genome shotgun sequence.
SNP_1111975	ENA|MKGO01000006|MKGO01000006.1	100	69	0	0	1	69	13510241	13510309	4.12e-28	128	ENA|MKGO01000006|MKGO01000006.1	69	69	69	0	100	1	1	TGCAGGCACTCCCTGGCCAGGTGGGCCATGATCTGCATCTCCTCGGGCGGGAACGCGCCCTTCAGCGCC	TGCAGGCACTCCCTGGCCAGGTGGGCCATGATCTGCATCTCCTCGGGCGGGAACGCGCCCTTCAGCGCC	69	575865107	ENA|MKGO01000006|MKGO01000006.1 Triticum urartu cultivar G1812 chromosome 6, whole genome shotgun sequence.
SNP_1111975	ENA|MKGO01000006|MKGO01000006.1	100	69	0	0	1	69	13532660	13532728	4.12e-28	128	ENA|MKGO01000006|MKGO01000006.1	69	69	69	0	100	1	1	TGCAGGCACTCCCTGGCCAGGTGGGCCATGATCTGCATCTCCTCGGGCGGGAACGCGCCCTTCAGCGCC	TGCAGGCACTCCCTGGCCAGGTGGGCCATGATCTGCATCTCCTCGGGCGGGAACGCGCCCTTCAGCGCC	69	575865107	ENA|MKGO01000006|MKGO01000006.1 Triticum urartu cultivar G1812 chromosome 6, whole genome shotgun sequence.
SNP_1111975	ENA|MKGO01000006|MKGO01000006.1	97.101	69	2	0	1	69	13523721	13523789	8.92e-25	117	ENA|MKGO01000006|MKGO01000006.1	63	67	67	0	97.1	1	1	TGCAGGCACTCCCTGGCCAGGTGGGCCATGATCTGCATCTCCTCGGGCGGGAACGCGCCCTTCAGCGCC	TGCAGGCACTTCCTGGCCAGGTGGGCCATGATCTGCATCTCCTCGGGCGGGAACACGCCCTTCAGCGCC	69	575865107	ENA|MKGO01000006|MKGO01000006.1 Triticum urartu cultivar G1812 chromosome 6, whole genome shotgun sequence.
SNP_1111975	ENA|MKGO01000004|MKGO01000004.1	95.652	69	3	0	1	69	14258933	14258865	4.15e-23	111	ENA|MKGO01000004|MKGO01000004.1	60	66	66	0	95.65	1	-1	TGCAGGCACTCCCTGGCCAGGTGGGCCATGATCTGCATCTCCTCGGGCGGGAACGCGCCCTTCAGCGCC	TGCAGGCACTCCCTTGCCAGGTGCGCCATGATCTGCATCTCCTCGGGCGGGAACACGCCCTTCAGCGCC	69	619584425	ENA|MKGO01000004|MKGO01000004.1 Triticum urartu cultivar G1812 chromosome 4, whole genome shotgun sequence.
SNP_1112356	ENA|MKGO01000004|MKGO01000004.1	98.551	69	1	0	1	69	613999691	613999623	1.92e-26	122	ENA|MKGO01000004|MKGO01000004.1	66	68	68	0	98.55	1	-1	TGCAGGGCTTGGTGTCTTCCAATAAAAGGAGACCATGGGGAGAGGAGAAGCTTCGTTTCAGAGGTCAGT	TGCAGGGCTTGGTGTCTTCCAATAAAAGGAGACCATGGGGAGAGGAGAAGCTTAGTTTCAGAGGTCAGT	69	619584425	ENA|MKGO01000004|MKGO01000004.1 Triticum urartu cultivar G1812 chromosome 4, whole genome shotgun sequence.
SNP_1112535	ENA|MKGO01000004|MKGO01000004.1	100	69	0	0	1	69	548016011	548016079	4.12e-28	128	ENA|MKGO01000004|MKGO01000004.1	69	69	69	0	100	1	1	TGCAGTGGGCGCACGGCTCCCTCAACGCGCTCTCCTGGGGCCTCCTGCTGCCAGTCGGCGCGGCCCTGG	TGCAGTGGGCGCACGGCTCCCTCAACGCGCTCTCCTGGGGCCTCCTGCTGCCAGTCGGCGCGGCCCTGG	69	619584425	ENA|MKGO01000004|MKGO01000004.1 Triticum urartu cultivar G1812 chromosome 4, whole genome shotgun sequence.
SNP_1112924	ENA|MKGO01000001|MKGO01000001.1	100	69	0	0	1	69	171851531	171851463	4.12e-28	128	ENA|MKGO01000001|MKGO01000001.1	69	69	69	0	100	1	-1	TGCAGGAGGAATCGGTCGCTACAGTACTAAAATCGGCCGCTACTGAGAAAACTATGGCATTGTTGTAGC	TGCAGGAGGAATCGGTCGCTACAGTACTAAAATCGGCCGCTACTGAGAAAACTATGGCATTGTTGTAGC	69	584211917	ENA|MKGO01000001|MKGO01000001.1 Triticum urartu cultivar G1812 chromosome 1, whole genome shotgun sequence.
SNP_1112924	ENA|MKGO01000001|MKGO01000001.1	100	69	0	0	1	69	171963933	171963865	4.12e-28	128	ENA|MKGO01000001|MKGO01000001.1	69	69	69	0	100	1	-1	TGCAGGAGGAATCGGTCGCTACAGTACTAAAATCGGCCGCTACTGAGAAAACTATGGCATTGTTGTAGC	TGCAGGAGGAATCGGTCGCTACAGTACTAAAATCGGCCGCTACTGAGAAAACTATGGCATTGTTGTAGC	69	584211917	ENA|MKGO01000001|MKGO01000001.1 Triticum urartu cultivar G1812 chromosome 1, whole genome shotgun sequence.
SNP_1113217	ENA|MKGO01000006|MKGO01000006.1	98.551	69	1	0	1	69	46258716	46258648	1.92e-26	122	ENA|MKGO01000006|MKGO01000006.1	66	68	68	0	98.55	1	-1	TGCAGCGCTACATCCATTTCTAATGCCGCAATGGATGTGCGCCTGCTGAACGAACTGCCCGTCACTCAT	TGCAGCGCTACATCCATTTCTAATGCCGCAATGGATGTGCGTCTGCTGAACGAACTGCCCGTCACTCAT	69	575865107	ENA|MKGO01000006|MKGO01000006.1 Triticum urartu cultivar G1812 chromosome 6, whole genome shotgun sequence.
SNP_1113217	ENA|MKGO01000006|MKGO01000006.1	98.551	69	1	0	1	69	523231352	523231284	1.92e-26	122	ENA|MKGO01000006|MKGO01000006.1	66	68	68	0	98.55	1	-1	TGCAGCGCTACATCCATTTCTAATGCCGCAATGGATGTGCGCCTGCTGAACGAACTGCCCGTCACTCAT	TGCAGCGCTACATCCATTTCTAATGCCGCAATGGATGTGCGTCTGCTGAACGAACTGCCCGTCACTCAT	69	575865107	ENA|MKGO01000006|MKGO01000006.1 Triticum urartu cultivar G1812 chromosome 6, whole genome shotgun sequence.
SNP_1113710	ENA|MKGO01000005|MKGO01000005.1	100	69	0	0	1	69	52120763	52120695	4.12e-28	128	ENA|MKGO01000005|MKGO01000005.1	69	69	69	0	100	1	-1	TGCAGGTTCTTTCTTAAGAAGTGACAATTGAAATGTAAGCCACTGATGTTTCATCTTGTTGCTATTTCA	TGCAGGTTCTTTCTTAAGAAGTGACAATTGAAATGTAAGCCACTGATGTTTCATCTTGTTGCTATTTCA	69	661480603	ENA|MKGO01000005|MKGO01000005.1 Triticum urartu cultivar G1812 chromosome 5, whole genome shotgun sequence.
SNP_1113733	ENA|MKGO01006176|MKGO01006176.1	100	60	0	0	1	60	14523	14464	4.15e-23	111	ENA|MKGO01006176|MKGO01006176.1	60	60	60	0	100	1	-1	TGCAGCCCTGCAAGCCGCCGCTGCACGAGACGGACCACCTCGGTGGCGCTGTGTTCACCG	TGCAGCCCTGCAAGCCGCCGCTGCACGAGACGGACCACCTCGGTGGCGCTGTGTTCACCG	69	14885	ENA|MKGO01006176|MKGO01006176.1 Triticum urartu cultivar G1812 TuUngrouped_contig_6468, whole genome shotgun sequence.
SNP_1114370	ENA|MKGO01000003|MKGO01000003.1	98.438	64	0	1	1	64	697786788	697786850	4.15e-23	111	ENA|MKGO01000003|MKGO01000003.1	60	63	63	1	98.44	1	1	TGCAGCACACCGTTCGGGTCATTCCACGCCTGCCTTTGCGCGTAAAGTATGTCGCCTCCGAGAT	TGCAGCACACCGTTCGGGTCATTCCACGCCTGCCTTTGCGCGTAAAGTATGTCGCCTCCG-GAT	69	747046674	ENA|MKGO01000003|MKGO01000003.1 Triticum urartu cultivar G1812 chromosome 3, whole genome shotgun sequence.
SNP_1114370	ENA|MKGO01000003|MKGO01000003.1	98.438	64	0	1	1	64	697888039	697888101	4.15e-23	111	ENA|MKGO01000003|MKGO01000003.1	60	63	63	1	98.44	1	1	TGCAGCACACCGTTCGGGTCATTCCACGCCTGCCTTTGCGCGTAAAGTATGTCGCCTCCGAGAT	TGCAGCACACCGTTCGGGTCATTCCACGCCTGCCTTTGCGCGTAAAGTATGTCGCCTCCG-GAT	69	747046674	ENA|MKGO01000003|MKGO01000003.1 Triticum urartu cultivar G1812 chromosome 3, whole genome shotgun sequence.
SNP_1115066	ENA|MKGO01000007|MKGO01000007.1	98.551	69	1	0	1	69	48989799	48989867	1.92e-26	122	ENA|MKGO01000007|MKGO01000007.1	66	68	68	0	98.55	1	1	TGCAGACTTTCTTTTAAATTGCGTCGTCGCTCTCATATGGTGATTATGACCATGCAAAAAAATCAATTA	TGCAGACTTTCTTTTAAATTGCGTCGTCGCTCTCATATGGTGATTATGATCATGCAAAAAAATCAATTA	69	719689837	ENA|MKGO01000007|MKGO01000007.1 Triticum urartu cultivar G1812 chromosome 7, whole genome shotgun sequence.
SNP_1115066	ENA|MKGO01000007|MKGO01000007.1	98.551	69	1	0	1	69	49191463	49191531	1.92e-26	122	ENA|MKGO01000007|MKGO01000007.1	66	68	68	0	98.55	1	1	TGCAGACTTTCTTTTAAATTGCGTCGTCGCTCTCATATGGTGATTATGACCATGCAAAAAAATCAATTA	TGCAGACTTTCTTTTAAATTGCGTCGTCGCTCTCATATGGTGATTATGATCATGCAAAAAAATCAATTA	69	719689837	ENA|MKGO01000007|MKGO01000007.1 Triticum urartu cultivar G1812 chromosome 7, whole genome shotgun sequence.
SNP_1115066	ENA|MKGO01000007|MKGO01000007.1	98.551	69	1	0	1	69	54313529	54313597	1.92e-26	122	ENA|MKGO01000007|MKGO01000007.1	66	68	68	0	98.55	1	1	TGCAGACTTTCTTTTAAATTGCGTCGTCGCTCTCATATGGTGATTATGACCATGCAAAAAAATCAATTA	TGCAGACTTTCTTTTAAATTGCGTCGTCGCTCTCATATGGTGATTATGATCATGCAAAAAAATCAATTA	69	719689837	ENA|MKGO01000007|MKGO01000007.1 Triticum urartu cultivar G1812 chromosome 7, whole genome shotgun sequence.
SNP_1115770	ENA|MKGO01000006|MKGO01000006.1	100	69	0	0	1	69	277971567	277971499	4.12e-28	128	ENA|MKGO01000006|MKGO01000006.1	69	69	69	0	100	1	-1	TGCAGCAAGGCCAAGCAACGGTCAAATATATTTGAAACACGCCCAGAACCCGCTCCTCGCCTCCCCTTC	TGCAGCAAGGCCAAGCAACGGTCAAATATATTTGAAACACGCCCAGAACCCGCTCCTCGCCTCCCCTTC	69	575865107	ENA|MKGO01000006|MKGO01000006.1 Triticum urartu cultivar G1812 chromosome 6, whole genome shotgun sequence.
SNP_1115837	ENA|MKGO01009408|MKGO01009408.1	100	69	0	0	1	69	20983	21051	4.12e-28	128	ENA|MKGO01009408|MKGO01009408.1	69	69	69	0	100	1	1	TGCAGGAAATGGGAAAGGAGAAAGGATCACTGACCGACTGACCGAATCTCGGCGCCGACGAGTGGAGTG	TGCAGGAAATGGGAAAGGAGAAAGGATCACTGACCGACTGACCGAATCTCGGCGCCGACGAGTGGAGTG	69	22176	ENA|MKGO01009408|MKGO01009408.1 Triticum urartu cultivar G1812 TuUngrouped_contig_9716, whole genome shotgun sequence.
SNP_1115837	ENA|MKGO01000003|MKGO01000003.1	100	69	0	0	1	69	593157490	593157422	4.12e-28	128	ENA|MKGO01000003|MKGO01000003.1	69	69	69	0	100	1	-1	TGCAGGAAATGGGAAAGGAGAAAGGATCACTGACCGACTGACCGAATCTCGGCGCCGACGAGTGGAGTG	TGCAGGAAATGGGAAAGGAGAAAGGATCACTGACCGACTGACCGAATCTCGGCGCCGACGAGTGGAGTG	69	747046674	ENA|MKGO01000003|MKGO01000003.1 Triticum urartu cultivar G1812 chromosome 3, whole genome shotgun sequence.
SNP_1115938	ENA|MKGO01000002|MKGO01000002.1	100	69	0	0	1	69	738086995	738086927	4.12e-28	128	ENA|MKGO01000002|MKGO01000002.1	69	69	69	0	100	1	-1	TGCAGAATTTGGGCAGTATATTAAGGTATAAAGGGTATTTTGGGATAGTTCGGTCATATTAATCCCGCA	TGCAGAATTTGGGCAGTATATTAAGGTATAAAGGGTATTTTGGGATAGTTCGGTCATATTAATCCCGCA	69	753719114	ENA|MKGO01000002|MKGO01000002.1 Triticum urartu cultivar G1812 chromosome 2, whole genome shotgun sequence.
SNP_1115938	ENA|MKGO01007666|MKGO01007666.1	98.214	56	0	1	1	56	6673	6727	1.16e-18	97.1	ENA|MKGO01007666|MKGO01007666.1	52	55	55	1	98.21	1	1	TGCAGAATTTGGGCAGTATATTAAGGTATAAAGGGTATTTTGGGATAGTTCGGTCA	TGCAGAATTTGGGCAGTATA-TAAGGTATAAAGGGTATTTTGGGATAGTTCGGTCA	69	9600	ENA|MKGO01007666|MKGO01007666.1 Triticum urartu cultivar G1812 TuUngrouped_contig_7965, whole genome shotgun sequence.
SNP_1115938	ENA|MKGO01000005|MKGO01000005.1	100	50	0	0	7	56	629271059	629271010	1.5e-17	93.5	ENA|MKGO01000005|MKGO01000005.1	50	50	50	0	100	1	-1	ATTTGGGCAGTATATTAAGGTATAAAGGGTATTTTGGGATAGTTCGGTCA	ATTTGGGCAGTATATTAAGGTATAAAGGGTATTTTGGGATAGTTCGGTCA	69	661480603	ENA|MKGO01000005|MKGO01000005.1 Triticum urartu cultivar G1812 chromosome 5, whole genome shotgun sequence.
SNP_1115938	ENA|MKGO01000005|MKGO01000005.1	93.182	44	1	2	1	44	629271094	629271053	1.18e-08	63.9	ENA|MKGO01000005|MKGO01000005.1	34	41	41	2	93.18	1	-1	TGCAGAATTTGGGCAGTATATTAAGGTATAAAGGGTATTTTGGG	TGCATAATTTGGGCAGTATATTAAGGTATAAAGG-TATTT-GGG	69	661480603	ENA|MKGO01000005|MKGO01000005.1 Triticum urartu cultivar G1812 chromosome 5, whole genome shotgun sequence.
SNP_1115946	ENA|MKGO01000005|MKGO01000005.1	100	59	0	0	1	59	569002813	569002871	1.49e-22	110	ENA|MKGO01000005|MKGO01000005.1	59	59	59	0	100	1	1	TGCAGGCAGGCCACATAGGTCTCCCGCGCTGTCGCCGCCGCCATCCGCCATGGACACCC	TGCAGGCAGGCCACATAGGTCTCCCGCGCTGTCGCCGCCGCCATCCGCCATGGACACCC	69	661480603	ENA|MKGO01000005|MKGO01000005.1 Triticum urartu cultivar G1812 chromosome 5, whole genome shotgun sequence.
SNP_1115946	ENA|MKGO01000005|MKGO01000005.1	96.667	60	1	1	1	60	569176742	569176800	3.23e-19	99	ENA|MKGO01000005|MKGO01000005.1	53	58	58	1	96.67	1	1	TGCAGGCAGGCCACATAGGTCTCCCGCGCTGTCGCCGCCGCCATCCGCCATGGACACCCG	TGCAGGCAGACCACATAGGTCT-CCGCGCTGTCGCCGCCGCCATCCGCCATGGACACCCG	69	661480603	ENA|MKGO01000005|MKGO01000005.1 Triticum urartu cultivar G1812 chromosome 5, whole genome shotgun sequence.
SNP_1115946	ENA|MKGO01000004|MKGO01000004.1	96.667	60	1	1	1	60	124432215	124432273	3.23e-19	99	ENA|MKGO01000004|MKGO01000004.1	53	58	58	1	96.67	1	1	TGCAGGCAGGCCACATAGGTCTCCCGCGCTGTCGCCGCCGCCATCCGCCATGGACACCCG	TGCAGGCAGACCACATAGGTCT-CCGCGCTGTCGCCGCCGCCATCCGCCATGGACACCCG	69	619584425	ENA|MKGO01000004|MKGO01000004.1 Triticum urartu cultivar G1812 chromosome 4, whole genome shotgun sequence.
SNP_1116563	ENA|MKGO01000001|MKGO01000001.1	100	60	0	0	1	60	120577557	120577616	4.15e-23	111	ENA|MKGO01000001|MKGO01000001.1	60	60	60	0	100	1	1	TGCAGCGCGAGCCCCTGGCCAAACCCAACCTGCCGCCGCTGGCCGTCCCAAGCGCATCCG	TGCAGCGCGAGCCCCTGGCCAAACCCAACCTGCCGCCGCTGGCCGTCCCAAGCGCATCCG	69	584211917	ENA|MKGO01000001|MKGO01000001.1 Triticum urartu cultivar G1812 chromosome 1, whole genome shotgun sequence.
SNP_1116563	ENA|MKGO01000001|MKGO01000001.1	100	60	0	0	1	60	120659416	120659475	4.15e-23	111	ENA|MKGO01000001|MKGO01000001.1	60	60	60	0	100	1	1	TGCAGCGCGAGCCCCTGGCCAAACCCAACCTGCCGCCGCTGGCCGTCCCAAGCGCATCCG	TGCAGCGCGAGCCCCTGGCCAAACCCAACCTGCCGCCGCTGGCCGTCCCAAGCGCATCCG	69	584211917	ENA|MKGO01000001|MKGO01000001.1 Triticum urartu cultivar G1812 chromosome 1, whole genome shotgun sequence.
SNP_1116563	ENA|MKGO01000006|MKGO01000006.1	96.154	52	2	0	9	60	240486356	240486407	2.52e-15	86.1	ENA|MKGO01000006|MKGO01000006.1	46	50	50	0	96.15	1	1	GAGCCCCTGGCCAAACCCAACCTGCCGCCGCTGGCCGTCCCAAGCGCATCCG	GAGCCCCTAGCCAAACCCAACCTGCCGCCGCTGGCCGTCCCAAGCACATCCG	69	575865107	ENA|MKGO01000006|MKGO01000006.1 Triticum urartu cultivar G1812 chromosome 6, whole genome shotgun sequence.
SNP_1117535	ENA|MKGO01000007|MKGO01000007.1	100	69	0	0	1	69	694458076	694458144	4.12e-28	128	ENA|MKGO01000007|MKGO01000007.1	69	69	69	0	100	1	1	TGCAGTTTATGCAGATTAAAGCATCAGAAAACACGATGTCTTGACAACAAGCGCCCTAATTGGACAGTT	TGCAGTTTATGCAGATTAAAGCATCAGAAAACACGATGTCTTGACAACAAGCGCCCTAATTGGACAGTT	69	719689837	ENA|MKGO01000007|MKGO01000007.1 Triticum urartu cultivar G1812 chromosome 7, whole genome shotgun sequence.
SNP_1117672	ENA|MKGO01000006|MKGO01000006.1	100	64	0	0	1	64	348183037	348183100	2.48e-25	119	ENA|MKGO01000006|MKGO01000006.1	64	64	64	0	100	1	1	TGCAGGGACTTTGCCCGGCGACGTCCTCCGACGACGGCGAGGGGAGCAAACTTAGATCTTGCCG	TGCAGGGACTTTGCCCGGCGACGTCCTCCGACGACGGCGAGGGGAGCAAACTTAGATCTTGCCG	69	575865107	ENA|MKGO01000006|MKGO01000006.1 Triticum urartu cultivar G1812 chromosome 6, whole genome shotgun sequence.
SNP_1117837	ENA|MKGO01000004|MKGO01000004.1	98.551	69	1	0	1	69	7624998	7625066	1.92e-26	122	ENA|MKGO01000004|MKGO01000004.1	66	68	68	0	98.55	1	1	TGCAGTGCTGCCACTCGGATTGCTACTCGGCAGACATGCACCAAAGAGGCCAAATTAGGCAGCGGAATC	TGCAGTGCTGCCACTCGGATTGCTACTCGGCAGACATGCACCAAAGAGGCCAAATTAGGTAGCGGAATC	69	619584425	ENA|MKGO01000004|MKGO01000004.1 Triticum urartu cultivar G1812 chromosome 4, whole genome shotgun sequence.
SNP_1118069	ENA|MKGO01000007|MKGO01000007.1	100	69	0	0	1	69	430961795	430961863	4.12e-28	128	ENA|MKGO01000007|MKGO01000007.1	69	69	69	0	100	1	1	TGCAGTTACTGCCAGCACTAGTACGCGAGCCAACGGGAACCCCGTGACGCGACGTCCACGTCGGCCAAA	TGCAGTTACTGCCAGCACTAGTACGCGAGCCAACGGGAACCCCGTGACGCGACGTCCACGTCGGCCAAA	69	719689837	ENA|MKGO01000007|MKGO01000007.1 Triticum urartu cultivar G1812 chromosome 7, whole genome shotgun sequence.
SNP_1118812	ENA|MKGO01004409|MKGO01004409.1	100	69	0	0	1	69	4056	4124	4.12e-28	128	ENA|MKGO01004409|MKGO01004409.1	69	69	69	0	100	1	1	TGCAGCGCTTGCCTCCGCATGGTGGCGCCGCGTTCTGCCCCCAAGTACTTCGTCTCGGCCTTTGGCTCC	TGCAGCGCTTGCCTCCGCATGGTGGCGCCGCGTTCTGCCCCCAAGTACTTCGTCTCGGCCTTTGGCTCC	69	13591	ENA|MKGO01004409|MKGO01004409.1 Triticum urartu cultivar G1812 TuUngrouped_contig_4700, whole genome shotgun sequence.
SNP_1119362	ENA|MKGO01000007|MKGO01000007.1	100	69	0	0	1	69	20443335	20443267	4.12e-28	128	ENA|MKGO01000007|MKGO01000007.1	69	69	69	0	100	1	-1	TGCAGTACACCAAACATAATCACAAGGAGGTTAACAAAACCGATATATTAGTAATACAAAATTCCCACT	TGCAGTACACCAAACATAATCACAAGGAGGTTAACAAAACCGATATATTAGTAATACAAAATTCCCACT	69	719689837	ENA|MKGO01000007|MKGO01000007.1 Triticum urartu cultivar G1812 chromosome 7, whole genome shotgun sequence.
SNP_1119699	ENA|MKGO01000007|MKGO01000007.1	98.462	65	1	0	1	65	626287658	626287594	3.21e-24	115	ENA|MKGO01000007|MKGO01000007.1	62	64	64	0	98.46	1	-1	TGCAGCGCAGACGCGAAGAACGGCTCTGGCCTAGCCATCGCTGATGGGACCATGGCGCACGCCCG	TGCAGCGCAGACGCGAAGAACGGCTCTGGCTTAGCCATCGCTGATGGGACCATGGCGCACGCCCG	69	719689837	ENA|MKGO01000007|MKGO01000007.1 Triticum urartu cultivar G1812 chromosome 7, whole genome shotgun sequence.
SNP_1119699	ENA|MKGO01000007|MKGO01000007.1	98.462	65	1	0	1	65	626350623	626350559	3.21e-24	115	ENA|MKGO01000007|MKGO01000007.1	62	64	64	0	98.46	1	-1	TGCAGCGCAGACGCGAAGAACGGCTCTGGCCTAGCCATCGCTGATGGGACCATGGCGCACGCCCG	TGCAGCGCAGACGCGAAGAACGGCTCTGGCTTAGCCATCGCTGATGGGACCATGGCGCACGCCCG	69	719689837	ENA|MKGO01000007|MKGO01000007.1 Triticum urartu cultivar G1812 chromosome 7, whole genome shotgun sequence.
SNP_1120788	ENA|MKGO01000002|MKGO01000002.1	100	69	0	0	1	69	536455722	536455790	4.12e-28	128	ENA|MKGO01000002|MKGO01000002.1	69	69	69	0	100	1	1	TGCAGACGAAGAAACGTCCAGTACTTGCCATTGGTATCTTCTTAGCCTTATTTCCTACATTGTCTACCG	TGCAGACGAAGAAACGTCCAGTACTTGCCATTGGTATCTTCTTAGCCTTATTTCCTACATTGTCTACCG	69	753719114	ENA|MKGO01000002|MKGO01000002.1 Triticum urartu cultivar G1812 chromosome 2, whole genome shotgun sequence.
SNP_1120997	ENA|MKGO01000007|MKGO01000007.1	100	69	0	0	1	69	663732207	663732275	4.12e-28	128	ENA|MKGO01000007|MKGO01000007.1	69	69	69	0	100	1	1	TGCAGATGATTGTCCAAGTTACTTGCGCCACAACGGTCGCCGTCGTTGCCTCTCTGGCCCTGCCTGGCA	TGCAGATGATTGTCCAAGTTACTTGCGCCACAACGGTCGCCGTCGTTGCCTCTCTGGCCCTGCCTGGCA	69	719689837	ENA|MKGO01000007|MKGO01000007.1 Triticum urartu cultivar G1812 chromosome 7, whole genome shotgun sequence.
SNP_1121291	ENA|MKGO01000007|MKGO01000007.1	100	69	0	0	1	69	25017739	25017807	4.12e-28	128	ENA|MKGO01000007|MKGO01000007.1	69	69	69	0	100	1	1	TGCAGAGACAGACAGTATCCACGCAGAAGAAGCAAGAGAATCGCTTTGCTTCCACTGCTTTATTGCAGA	TGCAGAGACAGACAGTATCCACGCAGAAGAAGCAAGAGAATCGCTTTGCTTCCACTGCTTTATTGCAGA	69	719689837	ENA|MKGO01000007|MKGO01000007.1 Triticum urartu cultivar G1812 chromosome 7, whole genome shotgun sequence.
SNP_1121763	ENA|MKGO01000006|MKGO01000006.1	98.551	69	1	0	1	69	575390141	575390209	1.92e-26	122	ENA|MKGO01000006|MKGO01000006.1	66	68	68	0	98.55	1	1	TGCAGATCAGTTATTTGCTACGTACTGTACTGTACGTACAAGTGGTCACCGATGGACATGCATGCATGC	TGCAGATCAGTTATTTGCTACGTAATGTACTGTACGTACAAGTGGTCACCGATGGACATGCATGCATGC	69	575865107	ENA|MKGO01000006|MKGO01000006.1 Triticum urartu cultivar G1812 chromosome 6, whole genome shotgun sequence.
SNP_1122296	ENA|MKGO01000007|MKGO01000007.1	100	69	0	0	1	69	73054307	73054239	4.12e-28	128	ENA|MKGO01000007|MKGO01000007.1	69	69	69	0	100	1	-1	TGCAGCACAGCAACTCCGATGTTAATGAATCTTTAATGTATCAGAGATCCCTGATGCTGCTTGGCGCGT	TGCAGCACAGCAACTCCGATGTTAATGAATCTTTAATGTATCAGAGATCCCTGATGCTGCTTGGCGCGT	69	719689837	ENA|MKGO01000007|MKGO01000007.1 Triticum urartu cultivar G1812 chromosome 7, whole genome shotgun sequence.
SNP_1122519	ENA|MKGO01000002|MKGO01000002.1	100	62	0	0	1	62	523484772	523484833	3.21e-24	115	ENA|MKGO01000002|MKGO01000002.1	62	62	62	0	100	1	1	TGCAGCGATCTGTACCCGAGGGCCACGGCGTACAGGAGGTGCAACTGGTGCCTGAGGGAGCC	TGCAGCGATCTGTACCCGAGGGCCACGGCGTACAGGAGGTGCAACTGGTGCCTGAGGGAGCC	69	753719114	ENA|MKGO01000002|MKGO01000002.1 Triticum urartu cultivar G1812 chromosome 2, whole genome shotgun sequence.
SNP_1122519	ENA|MKGO01000002|MKGO01000002.1	100	62	0	0	1	62	523559803	523559864	3.21e-24	115	ENA|MKGO01000002|MKGO01000002.1	62	62	62	0	100	1	1	TGCAGCGATCTGTACCCGAGGGCCACGGCGTACAGGAGGTGCAACTGGTGCCTGAGGGAGCC	TGCAGCGATCTGTACCCGAGGGCCACGGCGTACAGGAGGTGCAACTGGTGCCTGAGGGAGCC	69	753719114	ENA|MKGO01000002|MKGO01000002.1 Triticum urartu cultivar G1812 chromosome 2, whole genome shotgun sequence.
SNP_1124006	ENA|MKGO01000006|MKGO01000006.1	98.413	63	1	0	1	63	123133192	123133130	4.15e-23	111	ENA|MKGO01000006|MKGO01000006.1	60	62	62	0	98.41	1	-1	TGCAGGTGGGCTCCATCCGACGGCCGCAGTTGACCTTCCAGGCCCCGCCTCCGCGGCCCGCCG	TGCAGGTGGGCTCCTTCCGACGGCCGCAGTTGACCTTCCAGGCCCCGCCTCCGCGGCCCGCCG	69	575865107	ENA|MKGO01000006|MKGO01000006.1 Triticum urartu cultivar G1812 chromosome 6, whole genome shotgun sequence.
SNP_1124389	ENA|MKGO01000003|MKGO01000003.1	98.551	69	1	0	1	69	51461524	51461592	1.92e-26	122	ENA|MKGO01000003|MKGO01000003.1	66	68	68	0	98.55	1	1	TGCAGATTGATCTTGGATAGGTTTGAAGGAAGCAACAAAGAAGGAGAAAGAAGAAGCAGAAGATGAGCA	TGCAGATTGATCTTCGATAGGTTTGAAGGAAGCAACAAAGAAGGAGAAAGAAGAAGCAGAAGATGAGCA	69	747046674	ENA|MKGO01000003|MKGO01000003.1 Triticum urartu cultivar G1812 chromosome 3, whole genome shotgun sequence.
SNP_1124389	ENA|MKGO01000003|MKGO01000003.1	92.982	57	2	2	1	56	51477489	51477544	3.25e-14	82.4	ENA|MKGO01000003|MKGO01000003.1	44	53	53	2	92.98	1	1	TGCAGATTGATCTT-GGATAGGTTTGAAGGAAGCAACAAAGAAGGAGAAAGAAGAAG	TGCAGATTGATCTTGGGATAGGTTTGAAGGAAGCAACAAAGAAGAAGAA-GCAGAAG	69	747046674	ENA|MKGO01000003|MKGO01000003.1 Triticum urartu cultivar G1812 chromosome 3, whole genome shotgun sequence.
SNP_1124389	ENA|MKGO01000003|MKGO01000003.1	92.982	57	2	2	1	56	51482371	51482426	3.25e-14	82.4	ENA|MKGO01000003|MKGO01000003.1	44	53	53	2	92.98	1	1	TGCAGATTGATCTT-GGATAGGTTTGAAGGAAGCAACAAAGAAGGAGAAAGAAGAAG	TGCAGATTGATCTTGGGATAGGTTTGAAGGAAGCAACAAAGAAGAAGAA-GCAGAAG	69	747046674	ENA|MKGO01000003|MKGO01000003.1 Triticum urartu cultivar G1812 chromosome 3, whole genome shotgun sequence.
SNP_1124505	ENA|MKGO01000005|MKGO01000005.1	100	69	0	0	1	69	637470510	637470442	4.12e-28	128	ENA|MKGO01000005|MKGO01000005.1	69	69	69	0	100	1	-1	TGCAGTGGACTATACAAAGGGAATGCAATTCTCTTCAATATCAGATTAGCAGTGGTGTATGGACCTGGC	TGCAGTGGACTATACAAAGGGAATGCAATTCTCTTCAATATCAGATTAGCAGTGGTGTATGGACCTGGC	69	661480603	ENA|MKGO01000005|MKGO01000005.1 Triticum urartu cultivar G1812 chromosome 5, whole genome shotgun sequence.
SNP_1124505	ENA|MKGO01000005|MKGO01000005.1	100	69	0	0	1	69	653751256	653751324	4.12e-28	128	ENA|MKGO01000005|MKGO01000005.1	69	69	69	0	100	1	1	TGCAGTGGACTATACAAAGGGAATGCAATTCTCTTCAATATCAGATTAGCAGTGGTGTATGGACCTGGC	TGCAGTGGACTATACAAAGGGAATGCAATTCTCTTCAATATCAGATTAGCAGTGGTGTATGGACCTGGC	69	661480603	ENA|MKGO01000005|MKGO01000005.1 Triticum urartu cultivar G1812 chromosome 5, whole genome shotgun sequence.
SNP_1124505	ENA|MKGO01000005|MKGO01000005.1	100	69	0	0	1	69	653958982	653958914	4.12e-28	128	ENA|MKGO01000005|MKGO01000005.1	69	69	69	0	100	1	-1	TGCAGTGGACTATACAAAGGGAATGCAATTCTCTTCAATATCAGATTAGCAGTGGTGTATGGACCTGGC	TGCAGTGGACTATACAAAGGGAATGCAATTCTCTTCAATATCAGATTAGCAGTGGTGTATGGACCTGGC	69	661480603	ENA|MKGO01000005|MKGO01000005.1 Triticum urartu cultivar G1812 chromosome 5, whole genome shotgun sequence.
SNP_1125212	ENA|MKGO01000003|MKGO01000003.1	92.754	69	5	0	1	69	689053810	689053878	8.98e-20	100	ENA|MKGO01000003|MKGO01000003.1	54	64	64	0	92.75	1	1	TGCAGTGCCTGGCGCCGCGCCACCTCCGCCCGTGCCTTCCTCCTCGCCCACCACGCCCGCCAGCCCGCC	TGCCGCGCCTGGCGCAGCGCCACCTCCGCCCGCGACTTCCTCCTCGCCCACCACGCCCGCCAGCCCGCC	69	747046674	ENA|MKGO01000003|MKGO01000003.1 Triticum urartu cultivar G1812 chromosome 3, whole genome shotgun sequence.
SNP_1125212	ENA|MKGO01000003|MKGO01000003.1	92.754	69	5	0	1	69	689060472	689060540	8.98e-20	100	ENA|MKGO01000003|MKGO01000003.1	54	64	64	0	92.75	1	1	TGCAGTGCCTGGCGCCGCGCCACCTCCGCCCGTGCCTTCCTCCTCGCCCACCACGCCCGCCAGCCCGCC	TGCCGCGCCTGGCGCTGCGCCACCTCCGCCCGCGGCTTCCTCCTCGCCCACCACGCCCGCCAGCCCGCC	69	747046674	ENA|MKGO01000003|MKGO01000003.1 Triticum urartu cultivar G1812 chromosome 3, whole genome shotgun sequence.
SNP_1125212	ENA|MKGO01000003|MKGO01000003.1	96.61	59	2	0	8	66	687297255	687297313	3.23e-19	99	ENA|MKGO01000003|MKGO01000003.1	53	57	57	0	96.61	1	1	CCTGGCGCCGCGCCACCTCCGCCCGTGCCTTCCTCCTCGCCCACCACGCCCGCCAGCCC	CCTGGCGCCGCGCCACCTCCGCCCGCGGCTTCCTCCTCGCCCACCACGCCCGCCAGCCC	69	747046674	ENA|MKGO01000003|MKGO01000003.1 Triticum urartu cultivar G1812 chromosome 3, whole genome shotgun sequence.
SNP_1125212	ENA|MKGO01000003|MKGO01000003.1	96.61	59	2	0	8	66	689567651	689567709	3.23e-19	99	ENA|MKGO01000003|MKGO01000003.1	53	57	57	0	96.61	1	1	CCTGGCGCCGCGCCACCTCCGCCCGTGCCTTCCTCCTCGCCCACCACGCCCGCCAGCCC	CCTGGCGCCGCGCCACCTCCGCCCGCGGCTTCCTCCTCGCCCACCACGCCCGCCAGCCC	69	747046674	ENA|MKGO01000003|MKGO01000003.1 Triticum urartu cultivar G1812 chromosome 3, whole genome shotgun sequence.
SNP_1125212	ENA|MKGO01000003|MKGO01000003.1	93.651	63	4	0	7	69	63040566	63040504	4.18e-18	95.3	ENA|MKGO01000003|MKGO01000003.1	51	59	59	0	93.65	1	-1	GCCTGGCGCCGCGCCACCTCCGCCCGTGCCTTCCTCCTCGCCCACCACGCCCGCCAGCCCGCC	GCCTGGCGCCACGCCACCTCCGCCCGCGACTTCCTCCTCGCCCACCACGCCCGCCAGCCCTCC	69	747046674	ENA|MKGO01000003|MKGO01000003.1 Triticum urartu cultivar G1812 chromosome 3, whole genome shotgun sequence.
SNP_1125212	ENA|MKGO01000003|MKGO01000003.1	89.855	69	7	0	1	69	171791132	171791064	1.94e-16	89.8	ENA|MKGO01000003|MKGO01000003.1	48	62	62	0	89.86	1	-1	TGCAGTGCCTGGCGCCGCGCCACCTCCGCCCGTGCCTTCCTCCTCGCCCACCACGCCCGCCAGCCCGCC	TGCCGTGCCTGGCGCTGCACCACCTCCACCCGCGACTTCCTCCTCGCCCACCACGCCCGCCAGCCCTCC	69	747046674	ENA|MKGO01000003|MKGO01000003.1 Triticum urartu cultivar G1812 chromosome 3, whole genome shotgun sequence.
SNP_1125212	ENA|MKGO01000003|MKGO01000003.1	89.855	69	7	0	1	69	172008809	172008741	1.94e-16	89.8	ENA|MKGO01000003|MKGO01000003.1	48	62	62	0	89.86	1	-1	TGCAGTGCCTGGCGCCGCGCCACCTCCGCCCGTGCCTTCCTCCTCGCCCACCACGCCCGCCAGCCCGCC	TGCCGTGCCTGGCGCTGCACCACCTCCACCCGCGACTTCCTCCTCGCCCACCACGCCCGCCAGCCCTCC	69	747046674	ENA|MKGO01000003|MKGO01000003.1 Triticum urartu cultivar G1812 chromosome 3, whole genome shotgun sequence.
SNP_1125212	ENA|MKGO01000003|MKGO01000003.1	90.909	66	6	0	1	66	687290823	687290888	1.94e-16	89.8	ENA|MKGO01000003|MKGO01000003.1	48	60	60	0	90.91	1	1	TGCAGTGCCTGGCGCCGCGCCACCTCCGCCCGTGCCTTCCTCCTCGCCCACCACGCCCGCCAGCCC	TGCCGCGCCTGGCGCAGCGCCACCTCCGCCTGCGGCTTCCTCCTCGCCCACCACGCCCGCCAGCCC	69	747046674	ENA|MKGO01000003|MKGO01000003.1 Triticum urartu cultivar G1812 chromosome 3, whole genome shotgun sequence.
SNP_1125212	ENA|MKGO01000003|MKGO01000003.1	92.063	63	5	0	7	69	689423106	689423168	1.94e-16	89.8	ENA|MKGO01000003|MKGO01000003.1	48	58	58	0	92.06	1	1	GCCTGGCGCCGCGCCACCTCCGCCCGTGCCTTCCTCCTCGCCCACCACGCCCGCCAGCCCGCC	GCATGGCGCCGCACCACCTCCACCCGCGACTTCCTCCTCGCCCACCACGCCCGCCAGCCCGCC	69	747046674	ENA|MKGO01000003|MKGO01000003.1 Triticum urartu cultivar G1812 chromosome 3, whole genome shotgun sequence.
SNP_1125212	ENA|MKGO01000003|MKGO01000003.1	90.909	66	6	0	1	66	689561209	689561274	1.94e-16	89.8	ENA|MKGO01000003|MKGO01000003.1	48	60	60	0	90.91	1	1	TGCAGTGCCTGGCGCCGCGCCACCTCCGCCCGTGCCTTCCTCCTCGCCCACCACGCCCGCCAGCCC	TGCCGCGCCTGGCGCAGCGCCACCTCCGCCTGCGGCTTCCTCCTCGCCCACCACGCCCGCCAGCCC	69	747046674	ENA|MKGO01000003|MKGO01000003.1 Triticum urartu cultivar G1812 chromosome 3, whole genome shotgun sequence.
SNP_1125212	ENA|MKGO01000003|MKGO01000003.1	93.333	60	4	0	10	69	689787008	689786949	1.94e-16	89.8	ENA|MKGO01000003|MKGO01000003.1	48	56	56	0	93.33	1	-1	TGGCGCCGCGCCACCTCCGCCCGTGCCTTCCTCCTCGCCCACCACGCCCGCCAGCCCGCC	TGGCGCCGTGCCACCTCCACCGGTGACTTCCTCCTCGCCCACCACGCCCGCCAGCCCGCC	69	747046674	ENA|MKGO01000003|MKGO01000003.1 Triticum urartu cultivar G1812 chromosome 3, whole genome shotgun sequence.
SNP_1125212	ENA|MKGO01000003|MKGO01000003.1	86.885	61	8	0	9	69	687191259	687191319	2.53e-10	69.4	ENA|MKGO01000003|MKGO01000003.1	37	53	53	0	86.89	1	1	CTGGCGCCGCGCCACCTCCGCCCGTGCCTTCCTCCTCGCCCACCACGCCCGCCAGCCCGCC	CTGGCGCTGCGCCACCACCAACCGCCGATTCCTCCTCGCCCACCACGCCCGCCAGCCCGCC	69	747046674	ENA|MKGO01000003|MKGO01000003.1 Triticum urartu cultivar G1812 chromosome 3, whole genome shotgun sequence.
SNP_1125212	ENA|MKGO01000003|MKGO01000003.1	90.385	52	5	0	13	64	688983243	688983192	2.53e-10	69.4	ENA|MKGO01000003|MKGO01000003.1	37	47	47	0	90.38	1	-1	CGCCGCGCCACCTCCGCCCGTGCCTTCCTCCTCGCCCACCACGCCCGCCAGC	CGCCGCGCCACCTCCACTCGCCGCTTCCTCCTCGCCCACCACGCCCGCCAGC	69	747046674	ENA|MKGO01000003|MKGO01000003.1 Triticum urartu cultivar G1812 chromosome 3, whole genome shotgun sequence.
SNP_1125212	ENA|MKGO01000003|MKGO01000003.1	85.246	61	9	0	9	69	690904238	690904178	1.18e-08	63.9	ENA|MKGO01000003|MKGO01000003.1	34	52	52	0	85.25	1	-1	CTGGCGCCGCGCCACCTCCGCCCGTGCCTTCCTCCTCGCCCACCACGCCCGCCAGCCCGCC	CTGGCGCTGCGCCACCACCAACCGCCGATTCCTCCTCGCCCACCACGCCCGCCAGCGCGCC	69	747046674	ENA|MKGO01000003|MKGO01000003.1 Triticum urartu cultivar G1812 chromosome 3, whole genome shotgun sequence.
SNP_1125212	ENA|MKGO01000559|MKGO01000559.1	90.909	66	6	0	1	66	84270	84335	1.94e-16	89.8	ENA|MKGO01000559|MKGO01000559.1	48	60	60	0	90.91	1	1	TGCAGTGCCTGGCGCCGCGCCACCTCCGCCCGTGCCTTCCTCCTCGCCCACCACGCCCGCCAGCCC	TGCCGTGCCTGGCGCTGCACCACCTCCACCCGCGACTTCCTCCTCGCCCACCACGCCCGCCAGCCC	69	99091	ENA|MKGO01000559|MKGO01000559.1 Triticum urartu cultivar G1812 TuUngrouped_contig_699, whole genome shotgun sequence.
SNP_1125212	ENA|MKGO01000006|MKGO01000006.1	85.246	61	9	0	9	69	188634154	188634094	1.18e-08	63.9	ENA|MKGO01000006|MKGO01000006.1	34	52	52	0	85.25	1	-1	CTGGCGCCGCGCCACCTCCGCCCGTGCCTTCCTCCTCGCCCACCACGCCCGCCAGCCCGCC	CTGGCGCTGCGCCACCACCAACCGCCGATTCCTCCTCGCCCACCACGCCCGCCAGCGCGCC	69	575865107	ENA|MKGO01000006|MKGO01000006.1 Triticum urartu cultivar G1812 chromosome 6, whole genome shotgun sequence.
SNP_1125714	ENA|MKGO01000007|MKGO01000007.1	100	53	0	0	1	53	714181412	714181464	3.23e-19	99	ENA|MKGO01000007|MKGO01000007.1	53	53	53	0	100	1	1	TGCAGCAGCAGGACTCCACCGCCATCAAAAACTGTCTCGTCCTCGTGCCACCG	TGCAGCAGCAGGACTCCACCGCCATCAAAAACTGTCTCGTCCTCGTGCCACCG	69	719689837	ENA|MKGO01000007|MKGO01000007.1 Triticum urartu cultivar G1812 chromosome 7, whole genome shotgun sequence.
SNP_1125714	ENA|MKGO01000007|MKGO01000007.1	98.113	53	1	0	1	53	715356352	715356300	1.5e-17	93.5	ENA|MKGO01000007|MKGO01000007.1	50	52	52	0	98.11	1	-1	TGCAGCAGCAGGACTCCACCGCCATCAAAAACTGTCTCGTCCTCGTGCCACCG	TGCAGCAGCAGGATTCCACCGCCATCAAAAACTGTCTCGTCCTCGTGCCACCG	69	719689837	ENA|MKGO01000007|MKGO01000007.1 Triticum urartu cultivar G1812 chromosome 7, whole genome shotgun sequence.
SNP_1126204	ENA|MKGO01000002|MKGO01000002.1	100	69	0	0	1	69	565838145	565838077	4.12e-28	128	ENA|MKGO01000002|MKGO01000002.1	69	69	69	0	100	1	-1	TGCAGCACTCCCCCTTCATTTGGAAGAGGCCTTTGCTTCTGTTGTCCTGGAAAAAAGTTCAGCAAAATG	TGCAGCACTCCCCCTTCATTTGGAAGAGGCCTTTGCTTCTGTTGTCCTGGAAAAAAGTTCAGCAAAATG	69	753719114	ENA|MKGO01000002|MKGO01000002.1 Triticum urartu cultivar G1812 chromosome 2, whole genome shotgun sequence.
SNP_1126204	ENA|MKGO01000002|MKGO01000002.1	100	69	0	0	1	69	570478158	570478090	4.12e-28	128	ENA|MKGO01000002|MKGO01000002.1	69	69	69	0	100	1	-1	TGCAGCACTCCCCCTTCATTTGGAAGAGGCCTTTGCTTCTGTTGTCCTGGAAAAAAGTTCAGCAAAATG	TGCAGCACTCCCCCTTCATTTGGAAGAGGCCTTTGCTTCTGTTGTCCTGGAAAAAAGTTCAGCAAAATG	69	753719114	ENA|MKGO01000002|MKGO01000002.1 Triticum urartu cultivar G1812 chromosome 2, whole genome shotgun sequence.
SNP_1126831	ENA|MKGO01000001|MKGO01000001.1	98.113	53	1	0	3	55	529287809	529287861	1.5e-17	93.5	ENA|MKGO01000001|MKGO01000001.1	50	52	52	0	98.11	1	1	CAGGAAGATCTTGAGGAAGTTCTTGGAGAAGCCGCTCACCATGGCCACCCCCG	CAGAAAGATCTTGAGGAAGTTCTTGGAGAAGCCGCTCACCATGGCCACCCCCG	69	584211917	ENA|MKGO01000001|MKGO01000001.1 Triticum urartu cultivar G1812 chromosome 1, whole genome shotgun sequence.
SNP_1126831	ENA|MKGO01000001|MKGO01000001.1	98.113	53	1	0	3	55	529342662	529342714	1.5e-17	93.5	ENA|MKGO01000001|MKGO01000001.1	50	52	52	0	98.11	1	1	CAGGAAGATCTTGAGGAAGTTCTTGGAGAAGCCGCTCACCATGGCCACCCCCG	CAGAAAGATCTTGAGGAAGTTCTTGGAGAAGCCGCTCACCATGGCCACCCCCG	69	584211917	ENA|MKGO01000001|MKGO01000001.1 Triticum urartu cultivar G1812 chromosome 1, whole genome shotgun sequence.
SNP_1126831	ENA|MKGO01000905|MKGO01000905.1	96.364	55	2	0	1	55	31368	31422	5.41e-17	91.6	ENA|MKGO01000905|MKGO01000905.1	49	53	53	0	96.36	1	1	TGCAGGAAGATCTTGAGGAAGTTCTTGGAGAAGCCGCTCACCATGGCCACCCCCG	TGCATGAAGATCTTGAGGAAGTTCTTGGAGAAGCCGCTCAGCATGGCCACCCCCG	69	42596	ENA|MKGO01000905|MKGO01000905.1 Triticum urartu cultivar G1812 TuUngrouped_contig_1068, whole genome shotgun sequence.
SNP_1126831	ENA|MKGO01000006|MKGO01000006.1	96.364	55	2	0	1	55	39589006	39588952	5.41e-17	91.6	ENA|MKGO01000006|MKGO01000006.1	49	53	53	0	96.36	1	-1	TGCAGGAAGATCTTGAGGAAGTTCTTGGAGAAGCCGCTCACCATGGCCACCCCCG	TGCATGAAGATCTTGAGGAAGTTCTTGGAGAAGCCGCTCAGCATGGCCACCCCCG	69	575865107	ENA|MKGO01000006|MKGO01000006.1 Triticum urartu cultivar G1812 chromosome 6, whole genome shotgun sequence.
SNP_1126831	ENA|MKGO01000005|MKGO01000005.1	98.039	51	1	0	3	53	484235143	484235093	1.94e-16	89.8	ENA|MKGO01000005|MKGO01000005.1	48	50	50	0	98.04	1	-1	CAGGAAGATCTTGAGGAAGTTCTTGGAGAAGCCGCTCACCATGGCCACCCC	CAGGAAGATCTTGAGCAAGTTCTTGGAGAAGCCGCTCACCATGGCCACCCC	69	661480603	ENA|MKGO01000005|MKGO01000005.1 Triticum urartu cultivar G1812 chromosome 5, whole genome shotgun sequence.
SNP_1126831	ENA|MKGO01000004|MKGO01000004.1	98.039	51	1	0	3	53	53837053	53837103	1.94e-16	89.8	ENA|MKGO01000004|MKGO01000004.1	48	50	50	0	98.04	1	1	CAGGAAGATCTTGAGGAAGTTCTTGGAGAAGCCGCTCACCATGGCCACCCC	CAGGAAGATCTTGAGCAAGTTCTTGGAGAAGCCGCTCACCATGGCCACCCC	69	619584425	ENA|MKGO01000004|MKGO01000004.1 Triticum urartu cultivar G1812 chromosome 4, whole genome shotgun sequence.
SNP_1126831	ENA|MKGO01000004|MKGO01000004.1	96.078	51	2	0	3	53	470696034	470695984	9.05e-15	84.2	ENA|MKGO01000004|MKGO01000004.1	45	49	49	0	96.08	1	-1	CAGGAAGATCTTGAGGAAGTTCTTGGAGAAGCCGCTCACCATGGCCACCCC	CAGAAAGATCTTGCGGAAGTTCTTGGAGAAGCCGCTCACCATGGCCACCCC	69	619584425	ENA|MKGO01000004|MKGO01000004.1 Triticum urartu cultivar G1812 chromosome 4, whole genome shotgun sequence.
SNP_1126831	ENA|MKGO01000004|MKGO01000004.1	96.078	51	2	0	3	53	610670242	610670192	9.05e-15	84.2	ENA|MKGO01000004|MKGO01000004.1	45	49	49	0	96.08	1	-1	CAGGAAGATCTTGAGGAAGTTCTTGGAGAAGCCGCTCACCATGGCCACCCC	CAGAAAGATCTTGCGGAAGTTCTTGGAGAAGCCGCTCACCATGGCCACCCC	69	619584425	ENA|MKGO01000004|MKGO01000004.1 Triticum urartu cultivar G1812 chromosome 4, whole genome shotgun sequence.
SNP_1126831	ENA|MKGO01000007|MKGO01000007.1	96.078	51	2	0	3	53	32105197	32105247	9.05e-15	84.2	ENA|MKGO01000007|MKGO01000007.1	45	49	49	0	96.08	1	1	CAGGAAGATCTTGAGGAAGTTCTTGGAGAAGCCGCTCACCATGGCCACCCC	CAGAAAGATCTTGCGGAAGTTCTTGGAGAAGCCGCTCACCATGGCCACCCC	69	719689837	ENA|MKGO01000007|MKGO01000007.1 Triticum urartu cultivar G1812 chromosome 7, whole genome shotgun sequence.
SNP_1127043	ENA|MKGO01005430|MKGO01005430.1	100	69	0	0	1	69	8148	8080	4.12e-28	128	ENA|MKGO01005430|MKGO01005430.1	69	69	69	0	100	1	-1	TGCAGGGCGGCGCCACCACCCAGTTCGCCGCCGCGCCGCTCAACCTCTGCGCCTCCCCCTCCGACCCCG	TGCAGGGCGGCGCCACCACCCAGTTCGCCGCCGCGCCGCTCAACCTCTGCGCCTCCCCCTCCGACCCCG	69	8247	ENA|MKGO01005430|MKGO01005430.1 Triticum urartu cultivar G1812 TuUngrouped_contig_5722, whole genome shotgun sequence.
SNP_1127043	ENA|MKGO01000004|MKGO01000004.1	100	69	0	0	1	69	561242971	561242903	4.12e-28	128	ENA|MKGO01000004|MKGO01000004.1	69	69	69	0	100	1	-1	TGCAGGGCGGCGCCACCACCCAGTTCGCCGCCGCGCCGCTCAACCTCTGCGCCTCCCCCTCCGACCCCG	TGCAGGGCGGCGCCACCACCCAGTTCGCCGCCGCGCCGCTCAACCTCTGCGCCTCCCCCTCCGACCCCG	69	619584425	ENA|MKGO01000004|MKGO01000004.1 Triticum urartu cultivar G1812 chromosome 4, whole genome shotgun sequence.
SNP_1127502	ENA|MKGO01000006|MKGO01000006.1	100	69	0	0	1	69	103036791	103036859	4.12e-28	128	ENA|MKGO01000006|MKGO01000006.1	69	69	69	0	100	1	1	TGCAGAAACTCTTCCACATCTCAATTTTCCTGTTACTATGCACAGCCAAGGCAATCAACCCCGAAACTG	TGCAGAAACTCTTCCACATCTCAATTTTCCTGTTACTATGCACAGCCAAGGCAATCAACCCCGAAACTG	69	575865107	ENA|MKGO01000006|MKGO01000006.1 Triticum urartu cultivar G1812 chromosome 6, whole genome shotgun sequence.
SNP_1127899	ENA|MKGO01000007|MKGO01000007.1	100	69	0	0	1	69	29423440	29423508	4.12e-28	128	ENA|MKGO01000007|MKGO01000007.1	69	69	69	0	100	1	1	TGCAGATGCTGGTGGATGATATTGGTGATGTCACGATCACCAACGACGGGGCCACCATTTTGAGGATGC	TGCAGATGCTGGTGGATGATATTGGTGATGTCACGATCACCAACGACGGGGCCACCATTTTGAGGATGC	69	719689837	ENA|MKGO01000007|MKGO01000007.1 Triticum urartu cultivar G1812 chromosome 7, whole genome shotgun sequence.
SNP_1128569	ENA|MKGO01000005|MKGO01000005.1	100	69	0	0	1	69	614256794	614256726	4.12e-28	128	ENA|MKGO01000005|MKGO01000005.1	69	69	69	0	100	1	-1	TGCAGAGGAGGTGGCGGGTGTGGACGAGGTCCTGGTGAGATCGGAGCCGCCCAAGGGCGCGGGGACGAA	TGCAGAGGAGGTGGCGGGTGTGGACGAGGTCCTGGTGAGATCGGAGCCGCCCAAGGGCGCGGGGACGAA	69	661480603	ENA|MKGO01000005|MKGO01000005.1 Triticum urartu cultivar G1812 chromosome 5, whole genome shotgun sequence.
SNP_1128780	ENA|MKGO01000007|MKGO01000007.1	96.774	62	0	2	1	62	101108805	101108746	2.5e-20	102	ENA|MKGO01000007|MKGO01000007.1	55	60	60	2	96.77	1	-1	TGCAGCACGTCCTCGCCTGCCTCCTCATCGCCCTCGCCGCCGCCGCGCTCGCCGAGATCGGA	TGCAGCACGTCCTCGCCTGCCTCCTCATCGCCCTCGCCGCCGCCGCGCTCGCCG-GA-CGGA	69	719689837	ENA|MKGO01000007|MKGO01000007.1 Triticum urartu cultivar G1812 chromosome 7, whole genome shotgun sequence.
SNP_1128893	ENA|MKGO01000005|MKGO01000005.1	100	69	0	0	1	69	656999826	656999894	4.12e-28	128	ENA|MKGO01000005|MKGO01000005.1	69	69	69	0	100	1	1	TGCAGGCGGACTGTACTGGGCAGGCCCACTAGGCGAACTTAAAATCTGCCGCTGGACAGCACTGGGCCG	TGCAGGCGGACTGTACTGGGCAGGCCCACTAGGCGAACTTAAAATCTGCCGCTGGACAGCACTGGGCCG	69	661480603	ENA|MKGO01000005|MKGO01000005.1 Triticum urartu cultivar G1812 chromosome 5, whole genome shotgun sequence.
SNP_1129411	ENA|MKGO01000001|MKGO01000001.1	100	55	0	0	1	55	254715179	254715233	2.5e-20	102	ENA|MKGO01000001|MKGO01000001.1	55	55	55	0	100	1	1	TGCAGTTAGAGGGCAACAGGGGAGGGGAAGGCGCGCTGTGTGCCGTTGGGGTCCG	TGCAGTTAGAGGGCAACAGGGGAGGGGAAGGCGCGCTGTGTGCCGTTGGGGTCCG	69	584211917	ENA|MKGO01000001|MKGO01000001.1 Triticum urartu cultivar G1812 chromosome 1, whole genome shotgun sequence.
SNP_1129435	ENA|MKGO01000006|MKGO01000006.1	98.413	63	1	0	1	63	525141635	525141697	4.15e-23	111	ENA|MKGO01000006|MKGO01000006.1	60	62	62	0	98.41	1	1	TGCAGGATTTCACGCTGGCTTTGATACCATGCTCAAGTCGGGTTTAGGTGGGATGCCCTCCCG	TGCAGGATTTCACGCTGGCTTTGATACCATGCTCAAGTCGGGTTTAGGTGGGATGCCCCCCCG	69	575865107	ENA|MKGO01000006|MKGO01000006.1 Triticum urartu cultivar G1812 chromosome 6, whole genome shotgun sequence.
SNP_1129463	ENA|MKGO01000005|MKGO01000005.1	98.551	69	1	0	1	69	444360742	444360674	1.92e-26	122	ENA|MKGO01000005|MKGO01000005.1	66	68	68	0	98.55	1	-1	TGCAGCAGGGAAGACTGCTTTGCGGCACATGGCCAAGATGAGAGGTCAGGACGATCGGCCCTGGCTCCA	TGCAGCAGGGAAGACTGCTTTGCGGCACATGGCCAAGATGAGATGTCAGGACGATCGGCCCTGGCTCCA	69	661480603	ENA|MKGO01000005|MKGO01000005.1 Triticum urartu cultivar G1812 chromosome 5, whole genome shotgun sequence.
SNP_1129463	ENA|MKGO01000005|MKGO01000005.1	98.551	69	1	0	1	69	450760697	450760629	1.92e-26	122	ENA|MKGO01000005|MKGO01000005.1	66	68	68	0	98.55	1	-1	TGCAGCAGGGAAGACTGCTTTGCGGCACATGGCCAAGATGAGAGGTCAGGACGATCGGCCCTGGCTCCA	TGCAGCAGGGAAGACTGCTTTGCGGCACATGGCCAAGATGAGATGTCAGGACGATCGGCCCTGGCTCCA	69	661480603	ENA|MKGO01000005|MKGO01000005.1 Triticum urartu cultivar G1812 chromosome 5, whole genome shotgun sequence.
SNP_1129825	ENA|MKGO01000006|MKGO01000006.1	100	62	0	0	1	62	420822799	420822860	3.21e-24	115	ENA|MKGO01000006|MKGO01000006.1	62	62	62	0	100	1	1	TGCAGGCGACCTGCTTACAGAGGCAGCGCCGCGTCGGTCCGCCTGTCCGCCGTGCCGCCCCG	TGCAGGCGACCTGCTTACAGAGGCAGCGCCGCGTCGGTCCGCCTGTCCGCCGTGCCGCCCCG	69	575865107	ENA|MKGO01000006|MKGO01000006.1 Triticum urartu cultivar G1812 chromosome 6, whole genome shotgun sequence.
SNP_1130698	ENA|MKGO01000003|MKGO01000003.1	98.551	69	1	0	1	69	47029129	47029061	1.92e-26	122	ENA|MKGO01000003|MKGO01000003.1	66	68	68	0	98.55	1	-1	TGCAGTTGCAGATGCCCCTGCATTTAGGGCAGGCCCAGCGCGCCTTCTTGGCCGCCTTCTTCGCGTCCT	TGCAGTTGCAGATGCCCCTGCATTTGGGGCAGGCCCAGCGCGCCTTCTTGGCCGCCTTCTTCGCGTCCT	69	747046674	ENA|MKGO01000003|MKGO01000003.1 Triticum urartu cultivar G1812 chromosome 3, whole genome shotgun sequence.
SNP_1130698	ENA|MKGO01000003|MKGO01000003.1	98.551	69	1	0	1	69	47260780	47260712	1.92e-26	122	ENA|MKGO01000003|MKGO01000003.1	66	68	68	0	98.55	1	-1	TGCAGTTGCAGATGCCCCTGCATTTAGGGCAGGCCCAGCGCGCCTTCTTGGCCGCCTTCTTCGCGTCCT	TGCAGTTGCAGATGCCCCTGCATTTGGGGCAGGCCCAGCGCGCCTTCTTGGCCGCCTTCTTCGCGTCCT	69	747046674	ENA|MKGO01000003|MKGO01000003.1 Triticum urartu cultivar G1812 chromosome 3, whole genome shotgun sequence.
SNP_1131230	ENA|MKGO01000007|MKGO01000007.1	95.714	70	2	1	1	69	446034045	446033976	4.15e-23	111	ENA|MKGO01000007|MKGO01000007.1	60	67	67	1	95.71	1	-1	TGCAGGCAACAACATT-GTTTTTTTTTGAGAAACAACATTGTTCTTTTGGCCCTCCTTCTGCTCGTTTTC	TGCAGGCAACAACATTATTTTTTTTTTGAGAAACAACATCGTTCTTTTGGCCCTCCTTCTGCTCGTTTTC	69	719689837	ENA|MKGO01000007|MKGO01000007.1 Triticum urartu cultivar G1812 chromosome 7, whole genome shotgun sequence.
SNP_1131230	ENA|MKGO01000005|MKGO01000005.1	95.714	70	2	1	1	69	459292258	459292189	4.15e-23	111	ENA|MKGO01000005|MKGO01000005.1	60	67	67	1	95.71	1	-1	TGCAGGCAACAACATT-GTTTTTTTTTGAGAAACAACATTGTTCTTTTGGCCCTCCTTCTGCTCGTTTTC	TGCAGGCAACAACATTATTTTTTTTTTGAGAAACAACATCGTTCTTTTGGCCCTCCTTCTGCTCGTTTTC	69	661480603	ENA|MKGO01000005|MKGO01000005.1 Triticum urartu cultivar G1812 chromosome 5, whole genome shotgun sequence.
SNP_1135940	ENA|MKGO01000001|MKGO01000001.1	98.551	69	1	0	1	69	13420404	13420336	1.92e-26	122	ENA|MKGO01000001|MKGO01000001.1	66	68	68	0	98.55	1	-1	TGCAGGGCCACAAGACCCACAACTGCAAGCATCACTGCCATGGTCTTGACGCTGCTGTTGCCGCCTCTC	TGCAGGGCCACAAGACCCACAAGTGCAAGCATCACTGCCATGGTCTTGACGCTGCTGTTGCCGCCTCTC	69	584211917	ENA|MKGO01000001|MKGO01000001.1 Triticum urartu cultivar G1812 chromosome 1, whole genome shotgun sequence.
SNP_1136032	ENA|MKGO01000007|MKGO01000007.1	96.364	55	2	0	1	55	136465813	136465867	5.41e-17	91.6	ENA|MKGO01000007|MKGO01000007.1	49	53	53	0	96.36	1	1	TGCAGCCTAGGACTGGCCGTGTTTGACTCTGTAAATTGCCTGCTTAATTAACTGA	TGCAGCCTAGGACTGGCCCTGTTTGACTCTGTAAATTGCCTGCTTAATTAAGTGA	69	719689837	ENA|MKGO01000007|MKGO01000007.1 Triticum urartu cultivar G1812 chromosome 7, whole genome shotgun sequence.
SNP_1136032	ENA|MKGO01000007|MKGO01000007.1	100	34	0	0	36	69	697306118	697306151	1.18e-08	63.9	ENA|MKGO01000007|MKGO01000007.1	34	34	34	0	100	1	1	TTGCCTGCTTAATTAACTGAAGTGGAGCAGCCAT	TTGCCTGCTTAATTAACTGAAGTGGAGCAGCCAT	69	719689837	ENA|MKGO01000007|MKGO01000007.1 Triticum urartu cultivar G1812 chromosome 7, whole genome shotgun sequence.
SNP_1136198	ENA|MKGO01000005|MKGO01000005.1	100	69	0	0	1	69	523025574	523025642	4.12e-28	128	ENA|MKGO01000005|MKGO01000005.1	69	69	69	0	100	1	1	TGCAGCTGCTGGCGCATCTACCTCTCAACCCCAAGAAATACTACTGGCTGATTAGTCGGAGAAGTCTAT	TGCAGCTGCTGGCGCATCTACCTCTCAACCCCAAGAAATACTACTGGCTGATTAGTCGGAGAAGTCTAT	69	661480603	ENA|MKGO01000005|MKGO01000005.1 Triticum urartu cultivar G1812 chromosome 5, whole genome shotgun sequence.
SNP_1138413	ENA|MKGO01007417|MKGO01007417.1	98.438	64	1	0	1	64	13752	13815	1.15e-23	113	ENA|MKGO01007417|MKGO01007417.1	61	63	63	0	98.44	1	1	TGCAGCTGCCAAGCCAAAATCTGATGTAATGTGCTTCCTCTGATACAACTGCCTAAAATAGCCG	TGCAGCTGCCACGCCAAAATCTGATGTAATGTGCTTCCTCTGATACAACTGCCTAAAATAGCCG	69	16410	ENA|MKGO01007417|MKGO01007417.1 Triticum urartu cultivar G1812 TuUngrouped_contig_7715, whole genome shotgun sequence.
SNP_1138413	ENA|MKGO01000002|MKGO01000002.1	98.438	64	1	0	1	64	661840032	661840095	1.15e-23	113	ENA|MKGO01000002|MKGO01000002.1	61	63	63	0	98.44	1	1	TGCAGCTGCCAAGCCAAAATCTGATGTAATGTGCTTCCTCTGATACAACTGCCTAAAATAGCCG	TGCAGCTGCCACGCCAAAATCTGATGTAATGTGCTTCCTCTGATACAACTGCCTAAAATAGCCG	69	753719114	ENA|MKGO01000002|MKGO01000002.1 Triticum urartu cultivar G1812 chromosome 2, whole genome shotgun sequence.
SNP_1139042	ENA|MKGO01000002|MKGO01000002.1	100	69	0	0	1	69	522979300	522979368	4.12e-28	128	ENA|MKGO01000002|MKGO01000002.1	69	69	69	0	100	1	1	TGCAGTTTCTGATATATCCCGAAAAACCAGCCGTTTAGCCCCCTGGATTTTGCACCACATAGAGTCAAT	TGCAGTTTCTGATATATCCCGAAAAACCAGCCGTTTAGCCCCCTGGATTTTGCACCACATAGAGTCAAT	69	753719114	ENA|MKGO01000002|MKGO01000002.1 Triticum urartu cultivar G1812 chromosome 2, whole genome shotgun sequence.
SNP_1139725	ENA|MKGO01000006|MKGO01000006.1	100	69	0	0	1	69	46442896	46442964	4.12e-28	128	ENA|MKGO01000006|MKGO01000006.1	69	69	69	0	100	1	1	TGCAGCCAAATACTACACAACAACATGAGCCATAACTTGAATAGAAGGCGGAAAACACAAATCAGCATG	TGCAGCCAAATACTACACAACAACATGAGCCATAACTTGAATAGAAGGCGGAAAACACAAATCAGCATG	69	575865107	ENA|MKGO01000006|MKGO01000006.1 Triticum urartu cultivar G1812 chromosome 6, whole genome shotgun sequence.
SNP_1140525	ENA|MKGO01000006|MKGO01000006.1	98.551	69	1	0	1	69	21600446	21600378	1.92e-26	122	ENA|MKGO01000006|MKGO01000006.1	66	68	68	0	98.55	1	-1	TGCAGGTAGTGCTGGATGGGCAGAGTCCGAGAAACTCCATCGTGAACAAGCAGATTGAAGACGGAGTGT	TGCAGGTAGTGCTGGATGGGCAGAGTCCGAGAAACTCCATCGTGAACAAGCAGATTGAAGACGGAGCGT	69	575865107	ENA|MKGO01000006|MKGO01000006.1 Triticum urartu cultivar G1812 chromosome 6, whole genome shotgun sequence.
SNP_1140847	ENA|MKGO01005276|MKGO01005276.1	100	69	0	0	1	69	1394	1326	4.12e-28	128	ENA|MKGO01005276|MKGO01005276.1	69	69	69	0	100	1	-1	TGCAGGCAAAACACAGTGTCCCTCCTTGAGATCACACAAGCCCAGAAATTTCAGTCCTGTGTACTCCAT	TGCAGGCAAAACACAGTGTCCCTCCTTGAGATCACACAAGCCCAGAAATTTCAGTCCTGTGTACTCCAT	69	9618	ENA|MKGO01005276|MKGO01005276.1 Triticum urartu cultivar G1812 TuUngrouped_contig_5568, whole genome shotgun sequence.
SNP_1146450	ENA|MKGO01000001|MKGO01000001.1	100	69	0	0	1	69	280307696	280307764	4.12e-28	128	ENA|MKGO01000001|MKGO01000001.1	69	69	69	0	100	1	1	TGCAGCGACCGAAGCCAGAGAAATCAGAGACGCGAATCGCAGTTACCAGTAACAGGCGAAGAAATCCAA	TGCAGCGACCGAAGCCAGAGAAATCAGAGACGCGAATCGCAGTTACCAGTAACAGGCGAAGAAATCCAA	69	584211917	ENA|MKGO01000001|MKGO01000001.1 Triticum urartu cultivar G1812 chromosome 1, whole genome shotgun sequence.
SNP_1147270	ENA|MKGO01000002|MKGO01000002.1	100	56	0	0	1	56	26443192	26443247	6.94e-21	104	ENA|MKGO01000002|MKGO01000002.1	56	56	56	0	100	1	1	TGCAGAGTGATGACAACGGTTTGGCTGCGAACGTGGCCGCCAATTCCTCGATCCCG	TGCAGAGTGATGACAACGGTTTGGCTGCGAACGTGGCCGCCAATTCCTCGATCCCG	69	753719114	ENA|MKGO01000002|MKGO01000002.1 Triticum urartu cultivar G1812 chromosome 2, whole genome shotgun sequence.
SNP_1147583	ENA|MKGO01000002|MKGO01000002.1	100	69	0	0	1	69	670181090	670181158	4.12e-28	128	ENA|MKGO01000002|MKGO01000002.1	69	69	69	0	100	1	1	TGCAGGTCCTTGGGGTCCTTCCCGTCGACGGTGCAGCCGACGCTGACGCAGGTGCCGAGGATCTCCTTG	TGCAGGTCCTTGGGGTCCTTCCCGTCGACGGTGCAGCCGACGCTGACGCAGGTGCCGAGGATCTCCTTG	69	753719114	ENA|MKGO01000002|MKGO01000002.1 Triticum urartu cultivar G1812 chromosome 2, whole genome shotgun sequence.
SNP_1147583	ENA|MKGO01000002|MKGO01000002.1	100	69	0	0	1	69	670239306	670239374	4.12e-28	128	ENA|MKGO01000002|MKGO01000002.1	69	69	69	0	100	1	1	TGCAGGTCCTTGGGGTCCTTCCCGTCGACGGTGCAGCCGACGCTGACGCAGGTGCCGAGGATCTCCTTG	TGCAGGTCCTTGGGGTCCTTCCCGTCGACGGTGCAGCCGACGCTGACGCAGGTGCCGAGGATCTCCTTG	69	753719114	ENA|MKGO01000002|MKGO01000002.1 Triticum urartu cultivar G1812 chromosome 2, whole genome shotgun sequence.
SNP_1147583	ENA|MKGO01000006|MKGO01000006.1	97.101	69	2	0	1	69	463916889	463916821	8.92e-25	117	ENA|MKGO01000006|MKGO01000006.1	63	67	67	0	97.1	1	-1	TGCAGGTCCTTGGGGTCCTTCCCGTCGACGGTGCAGCCGACGCTGACGCAGGTGCCGAGGATCTCCTTG	TGCAGATCCTTGGGGTCCTTGCCGTCGACGGTGCAGCCGACGCTGACGCAGGTGCCGAGGATCTCCTTG	69	575865107	ENA|MKGO01000006|MKGO01000006.1 Triticum urartu cultivar G1812 chromosome 6, whole genome shotgun sequence.
SNP_1148396	ENA|MKGO01000006|MKGO01000006.1	96.667	60	0	2	1	60	276360197	276360254	3.23e-19	99	ENA|MKGO01000006|MKGO01000006.1	53	58	58	2	96.67	1	1	TGCAGCATCACCCGGAGTTCATCGACCGCACGTTGCCATCCCTAGATGCCCGAGATCGGA	TGCAGCATCACCCGGAGTTCATCGACCGCACGTTGCCATCCCTAGATGCCCG-GAT-GGA	69	575865107	ENA|MKGO01000006|MKGO01000006.1 Triticum urartu cultivar G1812 chromosome 6, whole genome shotgun sequence.
SNP_1154945	ENA|MKGO01000002|MKGO01000002.1	100	57	0	0	1	57	692258620	692258564	1.93e-21	106	ENA|MKGO01000002|MKGO01000002.1	57	57	57	0	100	1	-1	TGCAGGACGGCCCTCGTCGCAGCGGTGGTGGTGGTGGCCCTGGCGATGGCGCCGCCG	TGCAGGACGGCCCTCGTCGCAGCGGTGGTGGTGGTGGCCCTGGCGATGGCGCCGCCG	69	753719114	ENA|MKGO01000002|MKGO01000002.1 Triticum urartu cultivar G1812 chromosome 2, whole genome shotgun sequence.
SNP_1155852	ENA|MKGO01000001|MKGO01000001.1	100	69	0	0	1	69	573093620	573093552	4.12e-28	128	ENA|MKGO01000001|MKGO01000001.1	69	69	69	0	100	1	-1	TGCAGCAGGTTTAGTGAATATGAATCTGTCTTTGAACCACTTGACCGGAAAAATCCCAGAGAACATTGG	TGCAGCAGGTTTAGTGAATATGAATCTGTCTTTGAACCACTTGACCGGAAAAATCCCAGAGAACATTGG	69	584211917	ENA|MKGO01000001|MKGO01000001.1 Triticum urartu cultivar G1812 chromosome 1, whole genome shotgun sequence.
SNP_1155881	ENA|MKGO01000007|MKGO01000007.1	100	69	0	0	1	69	17350179	17350111	4.12e-28	128	ENA|MKGO01000007|MKGO01000007.1	69	69	69	0	100	1	-1	TGCAGCAAGCGACTAGCATATATGGTGGCTAACTTATTCGCAAAAGAGAGCGAGAAGAGGAGGCAAGGC	TGCAGCAAGCGACTAGCATATATGGTGGCTAACTTATTCGCAAAAGAGAGCGAGAAGAGGAGGCAAGGC	69	719689837	ENA|MKGO01000007|MKGO01000007.1 Triticum urartu cultivar G1812 chromosome 7, whole genome shotgun sequence.
SNP_1155881	ENA|MKGO01000007|MKGO01000007.1	100	69	0	0	1	69	30362699	30362631	4.12e-28	128	ENA|MKGO01000007|MKGO01000007.1	69	69	69	0	100	1	-1	TGCAGCAAGCGACTAGCATATATGGTGGCTAACTTATTCGCAAAAGAGAGCGAGAAGAGGAGGCAAGGC	TGCAGCAAGCGACTAGCATATATGGTGGCTAACTTATTCGCAAAAGAGAGCGAGAAGAGGAGGCAAGGC	69	719689837	ENA|MKGO01000007|MKGO01000007.1 Triticum urartu cultivar G1812 chromosome 7, whole genome shotgun sequence.
SNP_1155881	ENA|MKGO01000007|MKGO01000007.1	100	69	0	0	1	69	30371968	30371900	4.12e-28	128	ENA|MKGO01000007|MKGO01000007.1	69	69	69	0	100	1	-1	TGCAGCAAGCGACTAGCATATATGGTGGCTAACTTATTCGCAAAAGAGAGCGAGAAGAGGAGGCAAGGC	TGCAGCAAGCGACTAGCATATATGGTGGCTAACTTATTCGCAAAAGAGAGCGAGAAGAGGAGGCAAGGC	69	719689837	ENA|MKGO01000007|MKGO01000007.1 Triticum urartu cultivar G1812 chromosome 7, whole genome shotgun sequence.
SNP_1155881	ENA|MKGO01000007|MKGO01000007.1	100	69	0	0	1	69	93264687	93264755	4.12e-28	128	ENA|MKGO01000007|MKGO01000007.1	69	69	69	0	100	1	1	TGCAGCAAGCGACTAGCATATATGGTGGCTAACTTATTCGCAAAAGAGAGCGAGAAGAGGAGGCAAGGC	TGCAGCAAGCGACTAGCATATATGGTGGCTAACTTATTCGCAAAAGAGAGCGAGAAGAGGAGGCAAGGC	69	719689837	ENA|MKGO01000007|MKGO01000007.1 Triticum urartu cultivar G1812 chromosome 7, whole genome shotgun sequence.
SNP_1155881	ENA|MKGO01000007|MKGO01000007.1	100	69	0	0	1	69	100461233	100461165	4.12e-28	128	ENA|MKGO01000007|MKGO01000007.1	69	69	69	0	100	1	-1	TGCAGCAAGCGACTAGCATATATGGTGGCTAACTTATTCGCAAAAGAGAGCGAGAAGAGGAGGCAAGGC	TGCAGCAAGCGACTAGCATATATGGTGGCTAACTTATTCGCAAAAGAGAGCGAGAAGAGGAGGCAAGGC	69	719689837	ENA|MKGO01000007|MKGO01000007.1 Triticum urartu cultivar G1812 chromosome 7, whole genome shotgun sequence.
SNP_1155881	ENA|MKGO01000007|MKGO01000007.1	98.551	69	1	0	1	69	30397449	30397381	1.92e-26	122	ENA|MKGO01000007|MKGO01000007.1	66	68	68	0	98.55	1	-1	TGCAGCAAGCGACTAGCATATATGGTGGCTAACTTATTCGCAAAAGAGAGCGAGAAGAGGAGGCAAGGC	TGCAGCAAGCGACTAGCATATATGGTGGCTAACTTATTCGCAAAAGAGAGCGAGAACAGGAGGCAAGGC	69	719689837	ENA|MKGO01000007|MKGO01000007.1 Triticum urartu cultivar G1812 chromosome 7, whole genome shotgun sequence.
SNP_1155881	ENA|MKGO01000007|MKGO01000007.1	100	66	0	0	1	66	73950014	73950079	1.92e-26	122	ENA|MKGO01000007|MKGO01000007.1	66	66	66	0	100	1	1	TGCAGCAAGCGACTAGCATATATGGTGGCTAACTTATTCGCAAAAGAGAGCGAGAAGAGGAGGCAA	TGCAGCAAGCGACTAGCATATATGGTGGCTAACTTATTCGCAAAAGAGAGCGAGAAGAGGAGGCAA	69	719689837	ENA|MKGO01000007|MKGO01000007.1 Triticum urartu cultivar G1812 chromosome 7, whole genome shotgun sequence.
SNP_1155881	ENA|MKGO01000007|MKGO01000007.1	100	66	0	0	1	66	73959615	73959680	1.92e-26	122	ENA|MKGO01000007|MKGO01000007.1	66	66	66	0	100	1	1	TGCAGCAAGCGACTAGCATATATGGTGGCTAACTTATTCGCAAAAGAGAGCGAGAAGAGGAGGCAA	TGCAGCAAGCGACTAGCATATATGGTGGCTAACTTATTCGCAAAAGAGAGCGAGAAGAGGAGGCAA	69	719689837	ENA|MKGO01000007|MKGO01000007.1 Triticum urartu cultivar G1812 chromosome 7, whole genome shotgun sequence.
SNP_1155881	ENA|MKGO01000007|MKGO01000007.1	98.551	69	1	0	1	69	94666451	94666383	1.92e-26	122	ENA|MKGO01000007|MKGO01000007.1	66	68	68	0	98.55	1	-1	TGCAGCAAGCGACTAGCATATATGGTGGCTAACTTATTCGCAAAAGAGAGCGAGAAGAGGAGGCAAGGC	TGCAGCAAGCGACTAGCATATATGGTGGCTAACTTATTCGCAAAAGAGAGCGAGAAGAGGAGGCAAAGC	69	719689837	ENA|MKGO01000007|MKGO01000007.1 Triticum urartu cultivar G1812 chromosome 7, whole genome shotgun sequence.
SNP_1155881	ENA|MKGO01000007|MKGO01000007.1	98.551	69	1	0	1	69	94676051	94675983	1.92e-26	122	ENA|MKGO01000007|MKGO01000007.1	66	68	68	0	98.55	1	-1	TGCAGCAAGCGACTAGCATATATGGTGGCTAACTTATTCGCAAAAGAGAGCGAGAAGAGGAGGCAAGGC	TGCAGCAAGCGACTAGCATATATGGTGGCTAACTTATTCGCAAAAGAGAGCGAGAAGAGGAGGCAAAGC	69	719689837	ENA|MKGO01000007|MKGO01000007.1 Triticum urartu cultivar G1812 chromosome 7, whole genome shotgun sequence.
SNP_1155881	ENA|MKGO01000007|MKGO01000007.1	100	66	0	0	1	66	96083487	96083552	1.92e-26	122	ENA|MKGO01000007|MKGO01000007.1	66	66	66	0	100	1	1	TGCAGCAAGCGACTAGCATATATGGTGGCTAACTTATTCGCAAAAGAGAGCGAGAAGAGGAGGCAA	TGCAGCAAGCGACTAGCATATATGGTGGCTAACTTATTCGCAAAAGAGAGCGAGAAGAGGAGGCAA	69	719689837	ENA|MKGO01000007|MKGO01000007.1 Triticum urartu cultivar G1812 chromosome 7, whole genome shotgun sequence.
SNP_1155881	ENA|MKGO01000007|MKGO01000007.1	100	66	0	0	1	66	111614246	111614311	1.92e-26	122	ENA|MKGO01000007|MKGO01000007.1	66	66	66	0	100	1	1	TGCAGCAAGCGACTAGCATATATGGTGGCTAACTTATTCGCAAAAGAGAGCGAGAAGAGGAGGCAA	TGCAGCAAGCGACTAGCATATATGGTGGCTAACTTATTCGCAAAAGAGAGCGAGAAGAGGAGGCAA	69	719689837	ENA|MKGO01000007|MKGO01000007.1 Triticum urartu cultivar G1812 chromosome 7, whole genome shotgun sequence.
SNP_1155881	ENA|MKGO01000007|MKGO01000007.1	98.551	69	1	0	1	69	126305163	126305095	1.92e-26	122	ENA|MKGO01000007|MKGO01000007.1	66	68	68	0	98.55	1	-1	TGCAGCAAGCGACTAGCATATATGGTGGCTAACTTATTCGCAAAAGAGAGCGAGAAGAGGAGGCAAGGC	TGCAGCAAGCGACTAGCATATATGGTGGCTAACTTATTCGCAAAAGAGAGCGAGAAGAGGAGGCAAAGC	69	719689837	ENA|MKGO01000007|MKGO01000007.1 Triticum urartu cultivar G1812 chromosome 7, whole genome shotgun sequence.
SNP_1155881	ENA|MKGO01000007|MKGO01000007.1	98.551	69	1	0	1	69	136121414	136121346	1.92e-26	122	ENA|MKGO01000007|MKGO01000007.1	66	68	68	0	98.55	1	-1	TGCAGCAAGCGACTAGCATATATGGTGGCTAACTTATTCGCAAAAGAGAGCGAGAAGAGGAGGCAAGGC	TGCAGCAAGCGACTAGCATATATGGTGGCTAACTTATTCGCAAAAGAGAGCGAGAAGAGGAGGCAAAGC	69	719689837	ENA|MKGO01000007|MKGO01000007.1 Triticum urartu cultivar G1812 chromosome 7, whole genome shotgun sequence.
SNP_1155881	ENA|MKGO01000007|MKGO01000007.1	98.551	69	1	0	1	69	136130994	136130926	1.92e-26	122	ENA|MKGO01000007|MKGO01000007.1	66	68	68	0	98.55	1	-1	TGCAGCAAGCGACTAGCATATATGGTGGCTAACTTATTCGCAAAAGAGAGCGAGAAGAGGAGGCAAGGC	TGCAGCAAGCGACTAGCATATATGGTGGCTAACTTATTCGCAAAAGAGAGCGAGAAGAGGAGGCAAAGC	69	719689837	ENA|MKGO01000007|MKGO01000007.1 Triticum urartu cultivar G1812 chromosome 7, whole genome shotgun sequence.
SNP_1155881	ENA|MKGO01000007|MKGO01000007.1	98.551	69	1	0	1	69	138224538	138224470	1.92e-26	122	ENA|MKGO01000007|MKGO01000007.1	66	68	68	0	98.55	1	-1	TGCAGCAAGCGACTAGCATATATGGTGGCTAACTTATTCGCAAAAGAGAGCGAGAAGAGGAGGCAAGGC	TGCAGCAAGCGACTAGCATATATGGTGGCTAACTTATTCGCAAAAGAGAGCGAGAAGAGGAGGCAAAGC	69	719689837	ENA|MKGO01000007|MKGO01000007.1 Triticum urartu cultivar G1812 chromosome 7, whole genome shotgun sequence.
SNP_1155881	ENA|MKGO01000007|MKGO01000007.1	98.551	69	1	0	1	69	138558096	138558028	1.92e-26	122	ENA|MKGO01000007|MKGO01000007.1	66	68	68	0	98.55	1	-1	TGCAGCAAGCGACTAGCATATATGGTGGCTAACTTATTCGCAAAAGAGAGCGAGAAGAGGAGGCAAGGC	TGCAGCAAGCGACTAGCATATATGGTGGCTATCTTATTCGCAAAAGAGAGCGAGAAGAGGAGGCAAGGC	69	719689837	ENA|MKGO01000007|MKGO01000007.1 Triticum urartu cultivar G1812 chromosome 7, whole genome shotgun sequence.
SNP_1155881	ENA|MKGO01000007|MKGO01000007.1	98.551	69	1	0	1	69	161788916	161788848	1.92e-26	122	ENA|MKGO01000007|MKGO01000007.1	66	68	68	0	98.55	1	-1	TGCAGCAAGCGACTAGCATATATGGTGGCTAACTTATTCGCAAAAGAGAGCGAGAAGAGGAGGCAAGGC	TGCAGCAAGCGACTAGCATATATGGTGGCTAACTTATTCGCAAAAGAGAGCGAGAAGAGGAGGCAAAGC	69	719689837	ENA|MKGO01000007|MKGO01000007.1 Triticum urartu cultivar G1812 chromosome 7, whole genome shotgun sequence.
SNP_1155881	ENA|MKGO01000007|MKGO01000007.1	98.551	69	1	0	1	69	225217377	225217309	1.92e-26	122	ENA|MKGO01000007|MKGO01000007.1	66	68	68	0	98.55	1	-1	TGCAGCAAGCGACTAGCATATATGGTGGCTAACTTATTCGCAAAAGAGAGCGAGAAGAGGAGGCAAGGC	TGCAGCAAGCGACTAGCATATATGGTGGCTAACTTATTCGCAAAAGAGAGCGAGAAGAGGAGGCAAAGC	69	719689837	ENA|MKGO01000007|MKGO01000007.1 Triticum urartu cultivar G1812 chromosome 7, whole genome shotgun sequence.
SNP_1155881	ENA|MKGO01000007|MKGO01000007.1	100	66	0	0	1	66	241661276	241661341	1.92e-26	122	ENA|MKGO01000007|MKGO01000007.1	66	66	66	0	100	1	1	TGCAGCAAGCGACTAGCATATATGGTGGCTAACTTATTCGCAAAAGAGAGCGAGAAGAGGAGGCAA	TGCAGCAAGCGACTAGCATATATGGTGGCTAACTTATTCGCAAAAGAGAGCGAGAAGAGGAGGCAA	69	719689837	ENA|MKGO01000007|MKGO01000007.1 Triticum urartu cultivar G1812 chromosome 7, whole genome shotgun sequence.
SNP_1155881	ENA|MKGO01000007|MKGO01000007.1	100	66	0	0	1	66	241670792	241670857	1.92e-26	122	ENA|MKGO01000007|MKGO01000007.1	66	66	66	0	100	1	1	TGCAGCAAGCGACTAGCATATATGGTGGCTAACTTATTCGCAAAAGAGAGCGAGAAGAGGAGGCAA	TGCAGCAAGCGACTAGCATATATGGTGGCTAACTTATTCGCAAAAGAGAGCGAGAAGAGGAGGCAA	69	719689837	ENA|MKGO01000007|MKGO01000007.1 Triticum urartu cultivar G1812 chromosome 7, whole genome shotgun sequence.
SNP_1155881	ENA|MKGO01000007|MKGO01000007.1	98.551	69	1	0	1	69	247430487	247430419	1.92e-26	122	ENA|MKGO01000007|MKGO01000007.1	66	68	68	0	98.55	1	-1	TGCAGCAAGCGACTAGCATATATGGTGGCTAACTTATTCGCAAAAGAGAGCGAGAAGAGGAGGCAAGGC	TGCAGCAAGCGACTAGCATATATGGTGGCTAACTTATTCGCAAAAGAGAGCGAGAAGAGGAGGCAAAGC	69	719689837	ENA|MKGO01000007|MKGO01000007.1 Triticum urartu cultivar G1812 chromosome 7, whole genome shotgun sequence.
SNP_1155881	ENA|MKGO01000007|MKGO01000007.1	98.551	69	1	0	1	69	247680442	247680374	1.92e-26	122	ENA|MKGO01000007|MKGO01000007.1	66	68	68	0	98.55	1	-1	TGCAGCAAGCGACTAGCATATATGGTGGCTAACTTATTCGCAAAAGAGAGCGAGAAGAGGAGGCAAGGC	TGCAGCAAGCGACTAGCATATATGGTGGCTAACTTATTCGCAAAAGAGAGCGAGAAGAGGAGGCAAAGC	69	719689837	ENA|MKGO01000007|MKGO01000007.1 Triticum urartu cultivar G1812 chromosome 7, whole genome shotgun sequence.
SNP_1155881	ENA|MKGO01000007|MKGO01000007.1	98.551	69	1	0	1	69	254234556	254234488	1.92e-26	122	ENA|MKGO01000007|MKGO01000007.1	66	68	68	0	98.55	1	-1	TGCAGCAAGCGACTAGCATATATGGTGGCTAACTTATTCGCAAAAGAGAGCGAGAAGAGGAGGCAAGGC	TGCAGCAAGCGACTAGCATATATGGTGGCTAACTTATTCGCAAAAGAGAGCGAGAAGAGGAGGCAAAGC	69	719689837	ENA|MKGO01000007|MKGO01000007.1 Triticum urartu cultivar G1812 chromosome 7, whole genome shotgun sequence.
SNP_1155881	ENA|MKGO01000007|MKGO01000007.1	100	66	0	0	1	66	286723226	286723291	1.92e-26	122	ENA|MKGO01000007|MKGO01000007.1	66	66	66	0	100	1	1	TGCAGCAAGCGACTAGCATATATGGTGGCTAACTTATTCGCAAAAGAGAGCGAGAAGAGGAGGCAA	TGCAGCAAGCGACTAGCATATATGGTGGCTAACTTATTCGCAAAAGAGAGCGAGAAGAGGAGGCAA	69	719689837	ENA|MKGO01000007|MKGO01000007.1 Triticum urartu cultivar G1812 chromosome 7, whole genome shotgun sequence.
SNP_1155881	ENA|MKGO01000007|MKGO01000007.1	98.551	69	1	0	1	69	292054810	292054742	1.92e-26	122	ENA|MKGO01000007|MKGO01000007.1	66	68	68	0	98.55	1	-1	TGCAGCAAGCGACTAGCATATATGGTGGCTAACTTATTCGCAAAAGAGAGCGAGAAGAGGAGGCAAGGC	TGCAGCAAGCGACTAGCATATATGGTGGCTAACTTATTCGCAAAAGAGAGCGAGAAGAGGAGGCAAAGC	69	719689837	ENA|MKGO01000007|MKGO01000007.1 Triticum urartu cultivar G1812 chromosome 7, whole genome shotgun sequence.
SNP_1155881	ENA|MKGO01000007|MKGO01000007.1	98.551	69	1	0	1	69	307285185	307285117	1.92e-26	122	ENA|MKGO01000007|MKGO01000007.1	66	68	68	0	98.55	1	-1	TGCAGCAAGCGACTAGCATATATGGTGGCTAACTTATTCGCAAAAGAGAGCGAGAAGAGGAGGCAAGGC	TGCAGCAAGCGACTAGCATATATGGTGGCTAACTTATTCGCAAAAGAGAGCGAGAAGAGGAGGCAAAGC	69	719689837	ENA|MKGO01000007|MKGO01000007.1 Triticum urartu cultivar G1812 chromosome 7, whole genome shotgun sequence.
SNP_1155881	ENA|MKGO01000007|MKGO01000007.1	98.551	69	1	0	1	69	315485920	315485852	1.92e-26	122	ENA|MKGO01000007|MKGO01000007.1	66	68	68	0	98.55	1	-1	TGCAGCAAGCGACTAGCATATATGGTGGCTAACTTATTCGCAAAAGAGAGCGAGAAGAGGAGGCAAGGC	TGCAGCAAGCGACTAGCATATATGGTGGCTAACTTATTCGCAAAAGAGAGCGAGAAGAGGAGGCAAAGC	69	719689837	ENA|MKGO01000007|MKGO01000007.1 Triticum urartu cultivar G1812 chromosome 7, whole genome shotgun sequence.
SNP_1155881	ENA|MKGO01000007|MKGO01000007.1	98.551	69	1	0	1	69	318816570	318816502	1.92e-26	122	ENA|MKGO01000007|MKGO01000007.1	66	68	68	0	98.55	1	-1	TGCAGCAAGCGACTAGCATATATGGTGGCTAACTTATTCGCAAAAGAGAGCGAGAAGAGGAGGCAAGGC	TGCAGCAAGCGACTAGCATATATGGTGGCTATCTTATTCGCAAAAGAGAGCGAGAAGAGGAGGCAAGGC	69	719689837	ENA|MKGO01000007|MKGO01000007.1 Triticum urartu cultivar G1812 chromosome 7, whole genome shotgun sequence.
SNP_1155881	ENA|MKGO01000007|MKGO01000007.1	98.551	69	1	0	1	69	332366552	332366484	1.92e-26	122	ENA|MKGO01000007|MKGO01000007.1	66	68	68	0	98.55	1	-1	TGCAGCAAGCGACTAGCATATATGGTGGCTAACTTATTCGCAAAAGAGAGCGAGAAGAGGAGGCAAGGC	TGCAGCAAGCGACTAGCATATATGGTGGCTAACTTATTCGCAAAAGAGAGCGAGAAGAGGAGGCAAAGC	69	719689837	ENA|MKGO01000007|MKGO01000007.1 Triticum urartu cultivar G1812 chromosome 7, whole genome shotgun sequence.
SNP_1155881	ENA|MKGO01000007|MKGO01000007.1	98.551	69	1	0	1	69	332376174	332376106	1.92e-26	122	ENA|MKGO01000007|MKGO01000007.1	66	68	68	0	98.55	1	-1	TGCAGCAAGCGACTAGCATATATGGTGGCTAACTTATTCGCAAAAGAGAGCGAGAAGAGGAGGCAAGGC	TGCAGCAAGCGACTAGCATATATGGTGGCTAACTTATTCGCAAAAGAGAGCGAGAAGAGGAGGCAAAGC	69	719689837	ENA|MKGO01000007|MKGO01000007.1 Triticum urartu cultivar G1812 chromosome 7, whole genome shotgun sequence.
SNP_1155881	ENA|MKGO01000007|MKGO01000007.1	98.551	69	1	0	1	69	337779242	337779174	1.92e-26	122	ENA|MKGO01000007|MKGO01000007.1	66	68	68	0	98.55	1	-1	TGCAGCAAGCGACTAGCATATATGGTGGCTAACTTATTCGCAAAAGAGAGCGAGAAGAGGAGGCAAGGC	TGCAGCAAGCGACTAGCATATATGGTGGCTAACTTATTCGCAAAAGAGAGCGAGAAGAGGAGGCAAAGC	69	719689837	ENA|MKGO01000007|MKGO01000007.1 Triticum urartu cultivar G1812 chromosome 7, whole genome shotgun sequence.
SNP_1155881	ENA|MKGO01000007|MKGO01000007.1	98.551	69	1	0	1	69	355473028	355472960	1.92e-26	122	ENA|MKGO01000007|MKGO01000007.1	66	68	68	0	98.55	1	-1	TGCAGCAAGCGACTAGCATATATGGTGGCTAACTTATTCGCAAAAGAGAGCGAGAAGAGGAGGCAAGGC	TGCAGCAAGCGACTAGCATATATGGTGGCTATCTTATTCGCAAAAGAGAGCGAGAAGAGGAGGCAAGGC	69	719689837	ENA|MKGO01000007|MKGO01000007.1 Triticum urartu cultivar G1812 chromosome 7, whole genome shotgun sequence.
SNP_1155881	ENA|MKGO01000007|MKGO01000007.1	98.551	69	1	0	1	69	371902463	371902395	1.92e-26	122	ENA|MKGO01000007|MKGO01000007.1	66	68	68	0	98.55	1	-1	TGCAGCAAGCGACTAGCATATATGGTGGCTAACTTATTCGCAAAAGAGAGCGAGAAGAGGAGGCAAGGC	TGCAGCAAGCGACTAGCATATATGGTGGCTAACTTATTCGCAAAAGAGAGCGAGAAGAGGAGGCAAAGC	69	719689837	ENA|MKGO01000007|MKGO01000007.1 Triticum urartu cultivar G1812 chromosome 7, whole genome shotgun sequence.
SNP_1155881	ENA|MKGO01000007|MKGO01000007.1	100	66	0	0	1	66	373220265	373220330	1.92e-26	122	ENA|MKGO01000007|MKGO01000007.1	66	66	66	0	100	1	1	TGCAGCAAGCGACTAGCATATATGGTGGCTAACTTATTCGCAAAAGAGAGCGAGAAGAGGAGGCAA	TGCAGCAAGCGACTAGCATATATGGTGGCTAACTTATTCGCAAAAGAGAGCGAGAAGAGGAGGCAA	69	719689837	ENA|MKGO01000007|MKGO01000007.1 Triticum urartu cultivar G1812 chromosome 7, whole genome shotgun sequence.
SNP_1155881	ENA|MKGO01000007|MKGO01000007.1	98.551	69	1	0	1	69	380129807	380129739	1.92e-26	122	ENA|MKGO01000007|MKGO01000007.1	66	68	68	0	98.55	1	-1	TGCAGCAAGCGACTAGCATATATGGTGGCTAACTTATTCGCAAAAGAGAGCGAGAAGAGGAGGCAAGGC	TGCAGCAAGCGACTAGCATATATGGTGGCTAACTTATTCGCAAAAGAGAGCGAGAAGAGGAGGCAAAGC	69	719689837	ENA|MKGO01000007|MKGO01000007.1 Triticum urartu cultivar G1812 chromosome 7, whole genome shotgun sequence.
SNP_1155881	ENA|MKGO01000007|MKGO01000007.1	98.551	69	1	0	1	69	400609910	400609842	1.92e-26	122	ENA|MKGO01000007|MKGO01000007.1	66	68	68	0	98.55	1	-1	TGCAGCAAGCGACTAGCATATATGGTGGCTAACTTATTCGCAAAAGAGAGCGAGAAGAGGAGGCAAGGC	TGCAGCAAGCGACTAGCATATATGGTGGCTAACTTATTCGCAAAAGAGAGCGAGAAGAGGAGGCAAAGC	69	719689837	ENA|MKGO01000007|MKGO01000007.1 Triticum urartu cultivar G1812 chromosome 7, whole genome shotgun sequence.
SNP_1155881	ENA|MKGO01000007|MKGO01000007.1	98.551	69	1	0	1	69	455634661	455634593	1.92e-26	122	ENA|MKGO01000007|MKGO01000007.1	66	68	68	0	98.55	1	-1	TGCAGCAAGCGACTAGCATATATGGTGGCTAACTTATTCGCAAAAGAGAGCGAGAAGAGGAGGCAAGGC	TGCAGCAAGCGACTAGCATATATGGTGGCTAACTTATTCGCAAAAGAGAGCGAGAAGAGGAGGCAAAGC	69	719689837	ENA|MKGO01000007|MKGO01000007.1 Triticum urartu cultivar G1812 chromosome 7, whole genome shotgun sequence.
SNP_1155881	ENA|MKGO01000007|MKGO01000007.1	98.551	69	1	0	1	69	490139996	490139928	1.92e-26	122	ENA|MKGO01000007|MKGO01000007.1	66	68	68	0	98.55	1	-1	TGCAGCAAGCGACTAGCATATATGGTGGCTAACTTATTCGCAAAAGAGAGCGAGAAGAGGAGGCAAGGC	TGCAGCAAGCGACTAGCATATATGGTGGCTAACTTATTCGCAAAAGAGAGCGAGAAGAGGAGGCAAAGC	69	719689837	ENA|MKGO01000007|MKGO01000007.1 Triticum urartu cultivar G1812 chromosome 7, whole genome shotgun sequence.
SNP_1155881	ENA|MKGO01000007|MKGO01000007.1	98.551	69	1	0	1	69	498068337	498068269	1.92e-26	122	ENA|MKGO01000007|MKGO01000007.1	66	68	68	0	98.55	1	-1	TGCAGCAAGCGACTAGCATATATGGTGGCTAACTTATTCGCAAAAGAGAGCGAGAAGAGGAGGCAAGGC	TGCAGCAAGCGACTAGCATATATGGTGACTAACTTATTCGCAAAAGAGAGCGAGAAGAGGAGGCAAGGC	69	719689837	ENA|MKGO01000007|MKGO01000007.1 Triticum urartu cultivar G1812 chromosome 7, whole genome shotgun sequence.
SNP_1155881	ENA|MKGO01000007|MKGO01000007.1	100	66	0	0	1	66	506831820	506831885	1.92e-26	122	ENA|MKGO01000007|MKGO01000007.1	66	66	66	0	100	1	1	TGCAGCAAGCGACTAGCATATATGGTGGCTAACTTATTCGCAAAAGAGAGCGAGAAGAGGAGGCAA	TGCAGCAAGCGACTAGCATATATGGTGGCTAACTTATTCGCAAAAGAGAGCGAGAAGAGGAGGCAA	69	719689837	ENA|MKGO01000007|MKGO01000007.1 Triticum urartu cultivar G1812 chromosome 7, whole genome shotgun sequence.
SNP_1155881	ENA|MKGO01000007|MKGO01000007.1	98.551	69	1	0	1	69	523480335	523480267	1.92e-26	122	ENA|MKGO01000007|MKGO01000007.1	66	68	68	0	98.55	1	-1	TGCAGCAAGCGACTAGCATATATGGTGGCTAACTTATTCGCAAAAGAGAGCGAGAAGAGGAGGCAAGGC	TGCAGCAAGCGACTAGCATATATGGTGGCTAACTTATTCGCAAAAGAGAGCGAGAAGAGGAGGCAAAGC	69	719689837	ENA|MKGO01000007|MKGO01000007.1 Triticum urartu cultivar G1812 chromosome 7, whole genome shotgun sequence.
SNP_1155881	ENA|MKGO01000007|MKGO01000007.1	98.551	69	1	0	1	69	523489984	523489916	1.92e-26	122	ENA|MKGO01000007|MKGO01000007.1	66	68	68	0	98.55	1	-1	TGCAGCAAGCGACTAGCATATATGGTGGCTAACTTATTCGCAAAAGAGAGCGAGAAGAGGAGGCAAGGC	TGCAGCAAGCGACTAGCATATATGGTGGCTAACTTATTCGCAAAAGAGAGCGAGAAGAGGAGGCAAAGC	69	719689837	ENA|MKGO01000007|MKGO01000007.1 Triticum urartu cultivar G1812 chromosome 7, whole genome shotgun sequence.
SNP_1155881	ENA|MKGO01000007|MKGO01000007.1	98.551	69	1	0	1	69	590418244	590418312	1.92e-26	122	ENA|MKGO01000007|MKGO01000007.1	66	68	68	0	98.55	1	1	TGCAGCAAGCGACTAGCATATATGGTGGCTAACTTATTCGCAAAAGAGAGCGAGAAGAGGAGGCAAGGC	TGCAGCAAGCGACTAGCATATGTGGTGGCTAACTTATTCGCAAAAGAGAGCGAGAAGAGGAGGCAAGGC	69	719689837	ENA|MKGO01000007|MKGO01000007.1 Triticum urartu cultivar G1812 chromosome 7, whole genome shotgun sequence.
SNP_1155881	ENA|MKGO01000007|MKGO01000007.1	98.551	69	1	0	1	69	597169304	597169372	1.92e-26	122	ENA|MKGO01000007|MKGO01000007.1	66	68	68	0	98.55	1	1	TGCAGCAAGCGACTAGCATATATGGTGGCTAACTTATTCGCAAAAGAGAGCGAGAAGAGGAGGCAAGGC	TGCAGCAAGCGACTAGCATATGTGGTGGCTAACTTATTCGCAAAAGAGAGCGAGAAGAGGAGGCAAGGC	69	719689837	ENA|MKGO01000007|MKGO01000007.1 Triticum urartu cultivar G1812 chromosome 7, whole genome shotgun sequence.
SNP_1155881	ENA|MKGO01000007|MKGO01000007.1	98.551	69	1	0	1	69	597176674	597176742	1.92e-26	122	ENA|MKGO01000007|MKGO01000007.1	66	68	68	0	98.55	1	1	TGCAGCAAGCGACTAGCATATATGGTGGCTAACTTATTCGCAAAAGAGAGCGAGAAGAGGAGGCAAGGC	TGCAGCAAGCGACTAGCATATGTGGTGGCTAACTTATTCGCAAAAGAGAGCGAGAAGAGGAGGCAAGGC	69	719689837	ENA|MKGO01000007|MKGO01000007.1 Triticum urartu cultivar G1812 chromosome 7, whole genome shotgun sequence.
SNP_1155881	ENA|MKGO01000007|MKGO01000007.1	100	66	0	0	1	66	669681470	669681535	1.92e-26	122	ENA|MKGO01000007|MKGO01000007.1	66	66	66	0	100	1	1	TGCAGCAAGCGACTAGCATATATGGTGGCTAACTTATTCGCAAAAGAGAGCGAGAAGAGGAGGCAA	TGCAGCAAGCGACTAGCATATATGGTGGCTAACTTATTCGCAAAAGAGAGCGAGAAGAGGAGGCAA	69	719689837	ENA|MKGO01000007|MKGO01000007.1 Triticum urartu cultivar G1812 chromosome 7, whole genome shotgun sequence.
SNP_1155881	ENA|MKGO01000007|MKGO01000007.1	98.507	67	1	0	1	67	84624485	84624551	2.48e-25	119	ENA|MKGO01000007|MKGO01000007.1	64	66	66	0	98.51	1	1	TGCAGCAAGCGACTAGCATATATGGTGGCTAACTTATTCGCAAAAGAGAGCGAGAAGAGGAGGCAAG	TGCAGCAAGCGACTAGCATATGTGGTGGCTAACTTATTCGCAAAAGAGAGCGAGAAGAGGAGGCAAG	69	719689837	ENA|MKGO01000007|MKGO01000007.1 Triticum urartu cultivar G1812 chromosome 7, whole genome shotgun sequence.
SNP_1155881	ENA|MKGO01000007|MKGO01000007.1	100	64	0	0	3	66	187236885	187236948	2.48e-25	119	ENA|MKGO01000007|MKGO01000007.1	64	64	64	0	100	1	1	CAGCAAGCGACTAGCATATATGGTGGCTAACTTATTCGCAAAAGAGAGCGAGAAGAGGAGGCAA	CAGCAAGCGACTAGCATATATGGTGGCTAACTTATTCGCAAAAGAGAGCGAGAAGAGGAGGCAA	69	719689837	ENA|MKGO01000007|MKGO01000007.1 Triticum urartu cultivar G1812 chromosome 7, whole genome shotgun sequence.
SNP_1155881	ENA|MKGO01000007|MKGO01000007.1	98.485	66	1	0	1	66	11387828	11387893	8.92e-25	117	ENA|MKGO01000007|MKGO01000007.1	63	65	65	0	98.48	1	1	TGCAGCAAGCGACTAGCATATATGGTGGCTAACTTATTCGCAAAAGAGAGCGAGAAGAGGAGGCAA	TGCAGCAAGCGACTAGCATAAATGGTGGCTAACTTATTCGCAAAAGAGAGCGAGAAGAGGAGGCAA	69	719689837	ENA|MKGO01000007|MKGO01000007.1 Triticum urartu cultivar G1812 chromosome 7, whole genome shotgun sequence.
SNP_1155881	ENA|MKGO01000007|MKGO01000007.1	98.485	66	1	0	1	66	11397452	11397517	8.92e-25	117	ENA|MKGO01000007|MKGO01000007.1	63	65	65	0	98.48	1	1	TGCAGCAAGCGACTAGCATATATGGTGGCTAACTTATTCGCAAAAGAGAGCGAGAAGAGGAGGCAA	TGCAGCAAGCGACTAGCATAAATGGTGGCTAACTTATTCGCAAAAGAGAGCGAGAAGAGGAGGCAA	69	719689837	ENA|MKGO01000007|MKGO01000007.1 Triticum urartu cultivar G1812 chromosome 7, whole genome shotgun sequence.
SNP_1155881	ENA|MKGO01000007|MKGO01000007.1	97.101	69	2	0	1	69	13833070	13833002	8.92e-25	117	ENA|MKGO01000007|MKGO01000007.1	63	67	67	0	97.1	1	-1	TGCAGCAAGCGACTAGCATATATGGTGGCTAACTTATTCGCAAAAGAGAGCGAGAAGAGGAGGCAAGGC	TGCAGCAAGCGACTAGCATATGTGGTGGCTAACTTATCCGCAAAAGAGAGCGAGAAGAGGAGGCAAGGC	69	719689837	ENA|MKGO01000007|MKGO01000007.1 Triticum urartu cultivar G1812 chromosome 7, whole genome shotgun sequence.
SNP_1155881	ENA|MKGO01000007|MKGO01000007.1	98.485	66	1	0	1	66	19769781	19769716	8.92e-25	117	ENA|MKGO01000007|MKGO01000007.1	63	65	65	0	98.48	1	-1	TGCAGCAAGCGACTAGCATATATGGTGGCTAACTTATTCGCAAAAGAGAGCGAGAAGAGGAGGCAA	TGCAGCAAGCGACTAGCATATATGGTGGCTAACTTATTCGCAAAAGAGAGCGAGAAGAGAAGGCAA	69	719689837	ENA|MKGO01000007|MKGO01000007.1 Triticum urartu cultivar G1812 chromosome 7, whole genome shotgun sequence.
SNP_1155881	ENA|MKGO01000007|MKGO01000007.1	97.101	69	2	0	1	69	26347655	26347587	8.92e-25	117	ENA|MKGO01000007|MKGO01000007.1	63	67	67	0	97.1	1	-1	TGCAGCAAGCGACTAGCATATATGGTGGCTAACTTATTCGCAAAAGAGAGCGAGAAGAGGAGGCAAGGC	TGCAGCAAGCGACTAGCATATATGGTGGCTAACTTATACGCAAAAGAGAGCGAGAAGAGGAGGCAAAGC	69	719689837	ENA|MKGO01000007|MKGO01000007.1 Triticum urartu cultivar G1812 chromosome 7, whole genome shotgun sequence.
SNP_1155881	ENA|MKGO01000007|MKGO01000007.1	98.485	66	1	0	1	66	38951468	38951533	8.92e-25	117	ENA|MKGO01000007|MKGO01000007.1	63	65	65	0	98.48	1	1	TGCAGCAAGCGACTAGCATATATGGTGGCTAACTTATTCGCAAAAGAGAGCGAGAAGAGGAGGCAA	TGCAGCAAGCGACTAGCATATATGGTGGCTAACTTATACGCAAAAGAGAGCGAGAAGAGGAGGCAA	69	719689837	ENA|MKGO01000007|MKGO01000007.1 Triticum urartu cultivar G1812 chromosome 7, whole genome shotgun sequence.
SNP_1155881	ENA|MKGO01000007|MKGO01000007.1	98.485	66	1	0	1	66	45704108	45704173	8.92e-25	117	ENA|MKGO01000007|MKGO01000007.1	63	65	65	0	98.48	1	1	TGCAGCAAGCGACTAGCATATATGGTGGCTAACTTATTCGCAAAAGAGAGCGAGAAGAGGAGGCAA	TGCAGCAAGCGACTAGCATATATGGTGGCTAACTTATCCGCAAAAGAGAGCGAGAAGAGGAGGCAA	69	719689837	ENA|MKGO01000007|MKGO01000007.1 Triticum urartu cultivar G1812 chromosome 7, whole genome shotgun sequence.
SNP_1155881	ENA|MKGO01000007|MKGO01000007.1	97.101	69	2	0	1	69	57493630	57493562	8.92e-25	117	ENA|MKGO01000007|MKGO01000007.1	63	67	67	0	97.1	1	-1	TGCAGCAAGCGACTAGCATATATGGTGGCTAACTTATTCGCAAAAGAGAGCGAGAAGAGGAGGCAAGGC	TGCAGCAAGCGACTAGCATATGTGGTGGCTAACTTATCCGCAAAAGAGAGCGAGAAGAGGAGGCAAGGC	69	719689837	ENA|MKGO01000007|MKGO01000007.1 Triticum urartu cultivar G1812 chromosome 7, whole genome shotgun sequence.
SNP_1155881	ENA|MKGO01000007|MKGO01000007.1	97.101	69	2	0	1	69	63215179	63215111	8.92e-25	117	ENA|MKGO01000007|MKGO01000007.1	63	67	67	0	97.1	1	-1	TGCAGCAAGCGACTAGCATATATGGTGGCTAACTTATTCGCAAAAGAGAGCGAGAAGAGGAGGCAAGGC	TGCAGCAAGCGACTAGCATATGTGGTGGCTAACTTATTCACAAAAGAGAGCGAGAAGAGGAGGCAAGGC	69	719689837	ENA|MKGO01000007|MKGO01000007.1 Triticum urartu cultivar G1812 chromosome 7, whole genome shotgun sequence.
SNP_1155881	ENA|MKGO01000007|MKGO01000007.1	97.101	69	2	0	1	69	66053235	66053167	8.92e-25	117	ENA|MKGO01000007|MKGO01000007.1	63	67	67	0	97.1	1	-1	TGCAGCAAGCGACTAGCATATATGGTGGCTAACTTATTCGCAAAAGAGAGCGAGAAGAGGAGGCAAGGC	TGCAGCAAGCGACTAGCATATGTGGTGGCTAACTTATTCGCAAAAGAGAGCGAGAAGAGGAGGCAAAGC	69	719689837	ENA|MKGO01000007|MKGO01000007.1 Triticum urartu cultivar G1812 chromosome 7, whole genome shotgun sequence.
SNP_1155881	ENA|MKGO01000007|MKGO01000007.1	98.485	66	1	0	1	66	66511515	66511580	8.92e-25	117	ENA|MKGO01000007|MKGO01000007.1	63	65	65	0	98.48	1	1	TGCAGCAAGCGACTAGCATATATGGTGGCTAACTTATTCGCAAAAGAGAGCGAGAAGAGGAGGCAA	TGCAGCAAGCGACTAGCAAATATGGTGGCTAACTTATTCGCAAAAGAGAGCGAGAAGAGGAGGCAA	69	719689837	ENA|MKGO01000007|MKGO01000007.1 Triticum urartu cultivar G1812 chromosome 7, whole genome shotgun sequence.
SNP_1155881	ENA|MKGO01000007|MKGO01000007.1	97.101	69	2	0	1	69	73255603	73255535	8.92e-25	117	ENA|MKGO01000007|MKGO01000007.1	63	67	67	0	97.1	1	-1	TGCAGCAAGCGACTAGCATATATGGTGGCTAACTTATTCGCAAAAGAGAGCGAGAAGAGGAGGCAAGGC	TGCAGCAAGCGACTAGCAAATATGGTGGCTAACTTATTCGCAAAAGAGAGCGAGAAGAGGAGGCAAAGC	69	719689837	ENA|MKGO01000007|MKGO01000007.1 Triticum urartu cultivar G1812 chromosome 7, whole genome shotgun sequence.
SNP_1155881	ENA|MKGO01000007|MKGO01000007.1	97.143	70	1	1	1	69	73266683	73266614	8.92e-25	117	ENA|MKGO01000007|MKGO01000007.1	63	68	68	1	97.14	1	-1	TGCAGCAAGCGACTAGCATATATGGTGGCTAACTT-ATTCGCAAAAGAGAGCGAGAAGAGGAGGCAAGGC	TGCAGCAAGCGACTAGCATATATGGTGGCTAACTTTATTCGCAAAAGAGAGCGAGAAGAGGAGGCAAAGC	69	719689837	ENA|MKGO01000007|MKGO01000007.1 Triticum urartu cultivar G1812 chromosome 7, whole genome shotgun sequence.
SNP_1155881	ENA|MKGO01000007|MKGO01000007.1	98.485	66	1	0	1	66	73835703	73835768	8.92e-25	117	ENA|MKGO01000007|MKGO01000007.1	63	65	65	0	98.48	1	1	TGCAGCAAGCGACTAGCATATATGGTGGCTAACTTATTCGCAAAAGAGAGCGAGAAGAGGAGGCAA	TGCAGCAAGCGACTAGCATATATGGTGGCTAACTTATTCGCAAAAGAGGGCGAGAAGAGGAGGCAA	69	719689837	ENA|MKGO01000007|MKGO01000007.1 Triticum urartu cultivar G1812 chromosome 7, whole genome shotgun sequence.
SNP_1155881	ENA|MKGO01000007|MKGO01000007.1	97.101	69	2	0	1	69	82927629	82927561	8.92e-25	117	ENA|MKGO01000007|MKGO01000007.1	63	67	67	0	97.1	1	-1	TGCAGCAAGCGACTAGCATATATGGTGGCTAACTTATTCGCAAAAGAGAGCGAGAAGAGGAGGCAAGGC	TGCAGCAAGCGACTAGCATATGTGGTGGCTAACTTATCCGCAAAAGAGAGCGAGAAGAGGAGGCAAGGC	69	719689837	ENA|MKGO01000007|MKGO01000007.1 Triticum urartu cultivar G1812 chromosome 7, whole genome shotgun sequence.
SNP_1155881	ENA|MKGO01000007|MKGO01000007.1	97.101	69	2	0	1	69	84649278	84649210	8.92e-25	117	ENA|MKGO01000007|MKGO01000007.1	63	67	67	0	97.1	1	-1	TGCAGCAAGCGACTAGCATATATGGTGGCTAACTTATTCGCAAAAGAGAGCGAGAAGAGGAGGCAAGGC	TGCAGCAAGCGACTAGCATATGTGGTGGCTAACTTATACGCAAAAGAGAGCGAGAAGAGGAGGCAAGGC	69	719689837	ENA|MKGO01000007|MKGO01000007.1 Triticum urartu cultivar G1812 chromosome 7, whole genome shotgun sequence.
SNP_1155881	ENA|MKGO01000007|MKGO01000007.1	98.485	66	1	0	1	66	86072373	86072438	8.92e-25	117	ENA|MKGO01000007|MKGO01000007.1	63	65	65	0	98.48	1	1	TGCAGCAAGCGACTAGCATATATGGTGGCTAACTTATTCGCAAAAGAGAGCGAGAAGAGGAGGCAA	TGCAGCAAGCGACTAGCATATATGGTGGCTAACTTATTCGCAAAAGAGAGCGAGAAGAGAAGGCAA	69	719689837	ENA|MKGO01000007|MKGO01000007.1 Triticum urartu cultivar G1812 chromosome 7, whole genome shotgun sequence.
SNP_1155881	ENA|MKGO01000007|MKGO01000007.1	98.485	66	1	0	1	66	91977614	91977679	8.92e-25	117	ENA|MKGO01000007|MKGO01000007.1	63	65	65	0	98.48	1	1	TGCAGCAAGCGACTAGCATATATGGTGGCTAACTTATTCGCAAAAGAGAGCGAGAAGAGGAGGCAA	TGCAGCAAGCGACTAGCATATATGGTGGCTAACTTATTCGCAAAAGAGAGCGGGAAGAGGAGGCAA	69	719689837	ENA|MKGO01000007|MKGO01000007.1 Triticum urartu cultivar G1812 chromosome 7, whole genome shotgun sequence.
SNP_1155881	ENA|MKGO01000007|MKGO01000007.1	98.485	66	1	0	1	66	95351191	95351256	8.92e-25	117	ENA|MKGO01000007|MKGO01000007.1	63	65	65	0	98.48	1	1	TGCAGCAAGCGACTAGCATATATGGTGGCTAACTTATTCGCAAAAGAGAGCGAGAAGAGGAGGCAA	TGCAGCAAGCGACTAGCATATATGGTGGCTAACCTATTCGCAAAAGAGAGCGAGAAGAGGAGGCAA	69	719689837	ENA|MKGO01000007|MKGO01000007.1 Triticum urartu cultivar G1812 chromosome 7, whole genome shotgun sequence.
SNP_1155881	ENA|MKGO01000007|MKGO01000007.1	98.485	66	1	0	1	66	96602808	96602873	8.92e-25	117	ENA|MKGO01000007|MKGO01000007.1	63	65	65	0	98.48	1	1	TGCAGCAAGCGACTAGCATATATGGTGGCTAACTTATTCGCAAAAGAGAGCGAGAAGAGGAGGCAA	TGCAGCAAGCGACTAGCAAATATGGTGGCTAACTTATTCGCAAAAGAGAGCGAGAAGAGGAGGCAA	69	719689837	ENA|MKGO01000007|MKGO01000007.1 Triticum urartu cultivar G1812 chromosome 7, whole genome shotgun sequence.
SNP_1155881	ENA|MKGO01000007|MKGO01000007.1	98.485	66	1	0	1	66	97791117	97791182	8.92e-25	117	ENA|MKGO01000007|MKGO01000007.1	63	65	65	0	98.48	1	1	TGCAGCAAGCGACTAGCATATATGGTGGCTAACTTATTCGCAAAAGAGAGCGAGAAGAGGAGGCAA	TGCAGCAAGCGACTAGCATATATGGTGGCTATCTTATTCGCAAAAGAGAGCGAGAAGAGGAGGCAA	69	719689837	ENA|MKGO01000007|MKGO01000007.1 Triticum urartu cultivar G1812 chromosome 7, whole genome shotgun sequence.
SNP_1155881	ENA|MKGO01000007|MKGO01000007.1	98.485	66	1	0	1	66	97800772	97800837	8.92e-25	117	ENA|MKGO01000007|MKGO01000007.1	63	65	65	0	98.48	1	1	TGCAGCAAGCGACTAGCATATATGGTGGCTAACTTATTCGCAAAAGAGAGCGAGAAGAGGAGGCAA	TGCAGCAAGCGACTAGCATATATGGTGGCTATCTTATTCGCAAAAGAGAGCGAGAAGAGGAGGCAA	69	719689837	ENA|MKGO01000007|MKGO01000007.1 Triticum urartu cultivar G1812 chromosome 7, whole genome shotgun sequence.
SNP_1155881	ENA|MKGO01000007|MKGO01000007.1	97.101	69	2	0	1	69	98747277	98747209	8.92e-25	117	ENA|MKGO01000007|MKGO01000007.1	63	67	67	0	97.1	1	-1	TGCAGCAAGCGACTAGCATATATGGTGGCTAACTTATTCGCAAAAGAGAGCGAGAAGAGGAGGCAAGGC	TGCAGCAAGCGACTAGCATATATGGTGGCTAACTTATTCACAAAAGAGAGAGAGAAGAGGAGGCAAGGC	69	719689837	ENA|MKGO01000007|MKGO01000007.1 Triticum urartu cultivar G1812 chromosome 7, whole genome shotgun sequence.
SNP_1155881	ENA|MKGO01000007|MKGO01000007.1	97.101	69	2	0	1	69	100451656	100451588	8.92e-25	117	ENA|MKGO01000007|MKGO01000007.1	63	67	67	0	97.1	1	-1	TGCAGCAAGCGACTAGCATATATGGTGGCTAACTTATTCGCAAAAGAGAGCGAGAAGAGGAGGCAAGGC	TGCAGCAAGCGACTAGCATATATGGTGGCTAACTTATTCACAAAAGAGAGAGAGAAGAGGAGGCAAGGC	69	719689837	ENA|MKGO01000007|MKGO01000007.1 Triticum urartu cultivar G1812 chromosome 7, whole genome shotgun sequence.
SNP_1155881	ENA|MKGO01000007|MKGO01000007.1	98.485	66	1	0	1	66	109856642	109856707	8.92e-25	117	ENA|MKGO01000007|MKGO01000007.1	63	65	65	0	98.48	1	1	TGCAGCAAGCGACTAGCATATATGGTGGCTAACTTATTCGCAAAAGAGAGCGAGAAGAGGAGGCAA	TGCAGCAAGCGACTAGCATATATGGTGGCTAACTTAATCGCAAAAGAGAGCGAGAAGAGGAGGCAA	69	719689837	ENA|MKGO01000007|MKGO01000007.1 Triticum urartu cultivar G1812 chromosome 7, whole genome shotgun sequence.
SNP_1155881	ENA|MKGO01000007|MKGO01000007.1	98.485	66	1	0	1	66	109866207	109866272	8.92e-25	117	ENA|MKGO01000007|MKGO01000007.1	63	65	65	0	98.48	1	1	TGCAGCAAGCGACTAGCATATATGGTGGCTAACTTATTCGCAAAAGAGAGCGAGAAGAGGAGGCAA	TGCAGCAAGCGACTAGCAAATATGGTGGCTAACTTATTCGCAAAAGAGAGCGAGAAGAGGAGGCAA	69	719689837	ENA|MKGO01000007|MKGO01000007.1 Triticum urartu cultivar G1812 chromosome 7, whole genome shotgun sequence.
SNP_1155881	ENA|MKGO01000007|MKGO01000007.1	97.101	69	2	0	1	69	111178291	111178223	8.92e-25	117	ENA|MKGO01000007|MKGO01000007.1	63	67	67	0	97.1	1	-1	TGCAGCAAGCGACTAGCATATATGGTGGCTAACTTATTCGCAAAAGAGAGCGAGAAGAGGAGGCAAGGC	TGCAGCAAGCGACTAGCATATATGGTGGCTAACATATTCGCAAAAGAGAGCGAGAAGAGAAGGCAAGGC	69	719689837	ENA|MKGO01000007|MKGO01000007.1 Triticum urartu cultivar G1812 chromosome 7, whole genome shotgun sequence.
SNP_1155881	ENA|MKGO01000007|MKGO01000007.1	97.101	69	2	0	1	69	115695463	115695395	8.92e-25	117	ENA|MKGO01000007|MKGO01000007.1	63	67	67	0	97.1	1	-1	TGCAGCAAGCGACTAGCATATATGGTGGCTAACTTATTCGCAAAAGAGAGCGAGAAGAGGAGGCAAGGC	TGCAGCAAGCGACTAGCATATATGGTGGCTAACTTATCCGCAAAAGAGAGCGAGAAGAGGAGGCAAAGC	69	719689837	ENA|MKGO01000007|MKGO01000007.1 Triticum urartu cultivar G1812 chromosome 7, whole genome shotgun sequence.
SNP_1155881	ENA|MKGO01000007|MKGO01000007.1	97.101	69	2	0	1	69	136313350	136313282	8.92e-25	117	ENA|MKGO01000007|MKGO01000007.1	63	67	67	0	97.1	1	-1	TGCAGCAAGCGACTAGCATATATGGTGGCTAACTTATTCGCAAAAGAGAGCGAGAAGAGGAGGCAAGGC	TGCAGCAAGCGACTAGCATATGTGGTGGCTAACTTATACGCAAAAGAGAGCGAGAAGAGGAGGCAAGGC	69	719689837	ENA|MKGO01000007|MKGO01000007.1 Triticum urartu cultivar G1812 chromosome 7, whole genome shotgun sequence.
SNP_1155881	ENA|MKGO01000007|MKGO01000007.1	97.101	69	2	0	1	69	136322859	136322791	8.92e-25	117	ENA|MKGO01000007|MKGO01000007.1	63	67	67	0	97.1	1	-1	TGCAGCAAGCGACTAGCATATATGGTGGCTAACTTATTCGCAAAAGAGAGCGAGAAGAGGAGGCAAGGC	TGCAGCAAGCGACTAGCATATGTGGTGGCTAACTTATCCGCAAAAGAGAGCGAGAAGAGGAGGCAAGGC	69	719689837	ENA|MKGO01000007|MKGO01000007.1 Triticum urartu cultivar G1812 chromosome 7, whole genome shotgun sequence.
SNP_1155881	ENA|MKGO01000007|MKGO01000007.1	97.101	69	2	0	1	69	138319403	138319471	8.92e-25	117	ENA|MKGO01000007|MKGO01000007.1	63	67	67	0	97.1	1	1	TGCAGCAAGCGACTAGCATATATGGTGGCTAACTTATTCGCAAAAGAGAGCGAGAAGAGGAGGCAAGGC	TGCAGCAAGCGACTAGCATATGTGGTGGCTAACTTATACGCAAAAGAGAGCGAGAAGAGGAGGCAAGGC	69	719689837	ENA|MKGO01000007|MKGO01000007.1 Triticum urartu cultivar G1812 chromosome 7, whole genome shotgun sequence.
SNP_1155881	ENA|MKGO01000007|MKGO01000007.1	97.101	69	2	0	1	69	138329277	138329345	8.92e-25	117	ENA|MKGO01000007|MKGO01000007.1	63	67	67	0	97.1	1	1	TGCAGCAAGCGACTAGCATATATGGTGGCTAACTTATTCGCAAAAGAGAGCGAGAAGAGGAGGCAAGGC	TGCAGCAAGCGACTAGCATATGTGGTGGCTAACTTATACGCAAAAGAGAGCGAGAAGAGGAGGCAAGGC	69	719689837	ENA|MKGO01000007|MKGO01000007.1 Triticum urartu cultivar G1812 chromosome 7, whole genome shotgun sequence.
SNP_1155881	ENA|MKGO01000007|MKGO01000007.1	97.101	69	2	0	1	69	138567767	138567699	8.92e-25	117	ENA|MKGO01000007|MKGO01000007.1	63	67	67	0	97.1	1	-1	TGCAGCAAGCGACTAGCATATATGGTGGCTAACTTATTCGCAAAAGAGAGCGAGAAGAGGAGGCAAGGC	TGCAGCAAGCGACTAGCATATATGGTGGCTATCTTATTCGCAAAAGAGAGTGAGAAGAGGAGGCAAGGC	69	719689837	ENA|MKGO01000007|MKGO01000007.1 Triticum urartu cultivar G1812 chromosome 7, whole genome shotgun sequence.
SNP_1155881	ENA|MKGO01000007|MKGO01000007.1	97.101	69	2	0	1	69	138583246	138583314	8.92e-25	117	ENA|MKGO01000007|MKGO01000007.1	63	67	67	0	97.1	1	1	TGCAGCAAGCGACTAGCATATATGGTGGCTAACTTATTCGCAAAAGAGAGCGAGAAGAGGAGGCAAGGC	TGCAGCAAGCGACTAGCATATGTGGTGGCTAACTTATACGCAAAAGAGAGCGAGAAGAGGAGGCAAGGC	69	719689837	ENA|MKGO01000007|MKGO01000007.1 Triticum urartu cultivar G1812 chromosome 7, whole genome shotgun sequence.
SNP_1155881	ENA|MKGO01000007|MKGO01000007.1	97.101	69	2	0	1	69	138593120	138593188	8.92e-25	117	ENA|MKGO01000007|MKGO01000007.1	63	67	67	0	97.1	1	1	TGCAGCAAGCGACTAGCATATATGGTGGCTAACTTATTCGCAAAAGAGAGCGAGAAGAGGAGGCAAGGC	TGCAGCAAGCGACTAGCATATGTGGTGGCTAACTTATACGCAAAAGAGAGCGAGAAGAGGAGGCAAGGC	69	719689837	ENA|MKGO01000007|MKGO01000007.1 Triticum urartu cultivar G1812 chromosome 7, whole genome shotgun sequence.
SNP_1155881	ENA|MKGO01000007|MKGO01000007.1	97.101	69	2	0	1	69	138652079	138652147	8.92e-25	117	ENA|MKGO01000007|MKGO01000007.1	63	67	67	0	97.1	1	1	TGCAGCAAGCGACTAGCATATATGGTGGCTAACTTATTCGCAAAAGAGAGCGAGAAGAGGAGGCAAGGC	TGCAGCAAGCGACTAGCATATGTGGTGGCTAACTTATACGCAAAAGAGAGCGAGAAGAGGAGGCAAGGC	69	719689837	ENA|MKGO01000007|MKGO01000007.1 Triticum urartu cultivar G1812 chromosome 7, whole genome shotgun sequence.
SNP_1155881	ENA|MKGO01000007|MKGO01000007.1	97.101	69	2	0	1	69	140271793	140271725	8.92e-25	117	ENA|MKGO01000007|MKGO01000007.1	63	67	67	0	97.1	1	-1	TGCAGCAAGCGACTAGCATATATGGTGGCTAACTTATTCGCAAAAGAGAGCGAGAAGAGGAGGCAAGGC	TGCAGCAAGCGACTAGCATATATGGTGGCTAACTCATTCGCAAAAGAGAGCGAGAAGAGGAGGCAAAGC	69	719689837	ENA|MKGO01000007|MKGO01000007.1 Triticum urartu cultivar G1812 chromosome 7, whole genome shotgun sequence.
SNP_1155881	ENA|MKGO01000007|MKGO01000007.1	97.101	69	2	0	1	69	141068215	141068283	8.92e-25	117	ENA|MKGO01000007|MKGO01000007.1	63	67	67	0	97.1	1	1	TGCAGCAAGCGACTAGCATATATGGTGGCTAACTTATTCGCAAAAGAGAGCGAGAAGAGGAGGCAAGGC	TGCAGCAAGCGACTAGCATATGTGGTGGCTAACTTATCCGCAAAAGAGAGCGAGAAGAGGAGGCAAGGC	69	719689837	ENA|MKGO01000007|MKGO01000007.1 Triticum urartu cultivar G1812 chromosome 7, whole genome shotgun sequence.
SNP_1155881	ENA|MKGO01000007|MKGO01000007.1	98.485	66	1	0	1	66	144686908	144686973	8.92e-25	117	ENA|MKGO01000007|MKGO01000007.1	63	65	65	0	98.48	1	1	TGCAGCAAGCGACTAGCATATATGGTGGCTAACTTATTCGCAAAAGAGAGCGAGAAGAGGAGGCAA	TGCAGCAAGCGACTAGCATATATGGTGGCTATCTTATTCGCAAAAGAGAGCGAGAAGAGGAGGCAA	69	719689837	ENA|MKGO01000007|MKGO01000007.1 Triticum urartu cultivar G1812 chromosome 7, whole genome shotgun sequence.
SNP_1155881	ENA|MKGO01000007|MKGO01000007.1	98.485	66	1	0	1	66	161460968	161461033	8.92e-25	117	ENA|MKGO01000007|MKGO01000007.1	63	65	65	0	98.48	1	1	TGCAGCAAGCGACTAGCATATATGGTGGCTAACTTATTCGCAAAAGAGAGCGAGAAGAGGAGGCAA	TGCAGCAAGCGACTAGCATATATGGTGGCTAACTTATACGCAAAAGAGAGCGAGAAGAGGAGGCAA	69	719689837	ENA|MKGO01000007|MKGO01000007.1 Triticum urartu cultivar G1812 chromosome 7, whole genome shotgun sequence.
SNP_1155881	ENA|MKGO01000007|MKGO01000007.1	97.101	69	2	0	1	69	161770577	161770509	8.92e-25	117	ENA|MKGO01000007|MKGO01000007.1	63	67	67	0	97.1	1	-1	TGCAGCAAGCGACTAGCATATATGGTGGCTAACTTATTCGCAAAAGAGAGCGAGAAGAGGAGGCAAGGC	TGCAGCAAGCGACTAGCATATATGGTGGCTAACTTATTTGCAAAAGAGAGCGAGAAGAGGAGGCAAAGC	69	719689837	ENA|MKGO01000007|MKGO01000007.1 Triticum urartu cultivar G1812 chromosome 7, whole genome shotgun sequence.
SNP_1155881	ENA|MKGO01000007|MKGO01000007.1	98.485	66	1	0	1	66	164208006	164208071	8.92e-25	117	ENA|MKGO01000007|MKGO01000007.1	63	65	65	0	98.48	1	1	TGCAGCAAGCGACTAGCATATATGGTGGCTAACTTATTCGCAAAAGAGAGCGAGAAGAGGAGGCAA	TGCAGCAAGCGACTAGCATATATGGTGGCTATCTTATTCGCAAAAGAGAGCGAGAAGAGGAGGCAA	69	719689837	ENA|MKGO01000007|MKGO01000007.1 Triticum urartu cultivar G1812 chromosome 7, whole genome shotgun sequence.
SNP_1155881	ENA|MKGO01000007|MKGO01000007.1	97.101	69	2	0	1	69	169756420	169756352	8.92e-25	117	ENA|MKGO01000007|MKGO01000007.1	63	67	67	0	97.1	1	-1	TGCAGCAAGCGACTAGCATATATGGTGGCTAACTTATTCGCAAAAGAGAGCGAGAAGAGGAGGCAAGGC	TGCAGCAAGCGACTAGCAAATATGGTGGCTAACTTATTCGCAAAAGAGAGCGAGAAGAGGAGGCAAAGC	69	719689837	ENA|MKGO01000007|MKGO01000007.1 Triticum urartu cultivar G1812 chromosome 7, whole genome shotgun sequence.
SNP_1155881	ENA|MKGO01000007|MKGO01000007.1	97.101	69	2	0	1	69	174209087	174209155	8.92e-25	117	ENA|MKGO01000007|MKGO01000007.1	63	67	67	0	97.1	1	1	TGCAGCAAGCGACTAGCATATATGGTGGCTAACTTATTCGCAAAAGAGAGCGAGAAGAGGAGGCAAGGC	TGCAGCAAGCGACTAGCATATGTGGTGGCTAACTTATCCGCAAAAGAGAGCGAGAAGAGGAGGCAAGGC	69	719689837	ENA|MKGO01000007|MKGO01000007.1 Triticum urartu cultivar G1812 chromosome 7, whole genome shotgun sequence.
SNP_1155881	ENA|MKGO01000007|MKGO01000007.1	97.101	69	2	0	1	69	174218925	174218993	8.92e-25	117	ENA|MKGO01000007|MKGO01000007.1	63	67	67	0	97.1	1	1	TGCAGCAAGCGACTAGCATATATGGTGGCTAACTTATTCGCAAAAGAGAGCGAGAAGAGGAGGCAAGGC	TGCAGCAAGCGACTAGCATATGTGGTGGCTAACTTATCCGCAAAAGAGAGCGAGAAGAGGAGGCAAGGC	69	719689837	ENA|MKGO01000007|MKGO01000007.1 Triticum urartu cultivar G1812 chromosome 7, whole genome shotgun sequence.
SNP_1155881	ENA|MKGO01000007|MKGO01000007.1	97.101	69	2	0	1	69	175400686	175400618	8.92e-25	117	ENA|MKGO01000007|MKGO01000007.1	63	67	67	0	97.1	1	-1	TGCAGCAAGCGACTAGCATATATGGTGGCTAACTTATTCGCAAAAGAGAGCGAGAAGAGGAGGCAAGGC	TGCAGCAAGCGACTAGCATATGTGGTGGCTAACTTATACGCAAAAGAGAGCGAGAAGAGGAGGCAAGGC	69	719689837	ENA|MKGO01000007|MKGO01000007.1 Triticum urartu cultivar G1812 chromosome 7, whole genome shotgun sequence.
SNP_1155881	ENA|MKGO01000007|MKGO01000007.1	97.101	69	2	0	1	69	178460670	178460602	8.92e-25	117	ENA|MKGO01000007|MKGO01000007.1	63	67	67	0	97.1	1	-1	TGCAGCAAGCGACTAGCATATATGGTGGCTAACTTATTCGCAAAAGAGAGCGAGAAGAGGAGGCAAGGC	TGCAGCAAGCGACTAGCATATATGGTGGCTATCTTATTCGCAAAAGAGAGCGAGAAGAGGAGGCAAAGC	69	719689837	ENA|MKGO01000007|MKGO01000007.1 Triticum urartu cultivar G1812 chromosome 7, whole genome shotgun sequence.
SNP_1155881	ENA|MKGO01000007|MKGO01000007.1	97.101	69	2	0	1	69	182422004	182422072	8.92e-25	117	ENA|MKGO01000007|MKGO01000007.1	63	67	67	0	97.1	1	1	TGCAGCAAGCGACTAGCATATATGGTGGCTAACTTATTCGCAAAAGAGAGCGAGAAGAGGAGGCAAGGC	TGCAGCAAGCGACTAGCATATAGGGTGGCTATCTTATTCGCAAAAGAGAGCGAGAAGAGGAGGCAAGGC	69	719689837	ENA|MKGO01000007|MKGO01000007.1 Triticum urartu cultivar G1812 chromosome 7, whole genome shotgun sequence.
SNP_1155881	ENA|MKGO01000007|MKGO01000007.1	97.101	69	2	0	1	69	182431609	182431677	8.92e-25	117	ENA|MKGO01000007|MKGO01000007.1	63	67	67	0	97.1	1	1	TGCAGCAAGCGACTAGCATATATGGTGGCTAACTTATTCGCAAAAGAGAGCGAGAAGAGGAGGCAAGGC	TGCAGCAAGCGACTAGCATATAGGGTGGCTATCTTATTCGCAAAAGAGAGCGAGAAGAGGAGGCAAGGC	69	719689837	ENA|MKGO01000007|MKGO01000007.1 Triticum urartu cultivar G1812 chromosome 7, whole genome shotgun sequence.
SNP_1155881	ENA|MKGO01000007|MKGO01000007.1	98.485	66	1	0	1	66	187965621	187965556	8.92e-25	117	ENA|MKGO01000007|MKGO01000007.1	63	65	65	0	98.48	1	-1	TGCAGCAAGCGACTAGCATATATGGTGGCTAACTTATTCGCAAAAGAGAGCGAGAAGAGGAGGCAA	TGCAGCAAGCGACTAGCATATATGGTGGCTAACTTATTCGCAAAAGAGAGCGAGAAGAGAAGGCAA	69	719689837	ENA|MKGO01000007|MKGO01000007.1 Triticum urartu cultivar G1812 chromosome 7, whole genome shotgun sequence.
SNP_1155881	ENA|MKGO01000007|MKGO01000007.1	98.485	66	1	0	1	66	189074068	189074133	8.92e-25	117	ENA|MKGO01000007|MKGO01000007.1	63	65	65	0	98.48	1	1	TGCAGCAAGCGACTAGCATATATGGTGGCTAACTTATTCGCAAAAGAGAGCGAGAAGAGGAGGCAA	TGCAGCAAGCGACTAGCATATATGGTGGCTAACTTATACGCAAAAGAGAGCGAGAAGAGGAGGCAA	69	719689837	ENA|MKGO01000007|MKGO01000007.1 Triticum urartu cultivar G1812 chromosome 7, whole genome shotgun sequence.
SNP_1155881	ENA|MKGO01000007|MKGO01000007.1	98.485	66	1	0	1	66	189083662	189083727	8.92e-25	117	ENA|MKGO01000007|MKGO01000007.1	63	65	65	0	98.48	1	1	TGCAGCAAGCGACTAGCATATATGGTGGCTAACTTATTCGCAAAAGAGAGCGAGAAGAGGAGGCAA	TGCAGCAAGCGACTAGCATATATGGTGGCTAACTTATACGCAAAAGAGAGCGAGAAGAGGAGGCAA	69	719689837	ENA|MKGO01000007|MKGO01000007.1 Triticum urartu cultivar G1812 chromosome 7, whole genome shotgun sequence.
SNP_1155881	ENA|MKGO01000007|MKGO01000007.1	97.101	69	2	0	1	69	204614888	204614820	8.92e-25	117	ENA|MKGO01000007|MKGO01000007.1	63	67	67	0	97.1	1	-1	TGCAGCAAGCGACTAGCATATATGGTGGCTAACTTATTCGCAAAAGAGAGCGAGAAGAGGAGGCAAGGC	TGCAGCAAGCGACTAGCATATGTGGTGGCTAACTTATACGCAAAAGAGAGCGAGAAGAGGAGGCAAGGC	69	719689837	ENA|MKGO01000007|MKGO01000007.1 Triticum urartu cultivar G1812 chromosome 7, whole genome shotgun sequence.
SNP_1155881	ENA|MKGO01000007|MKGO01000007.1	97.101	69	2	0	1	69	204624726	204624658	8.92e-25	117	ENA|MKGO01000007|MKGO01000007.1	63	67	67	0	97.1	1	-1	TGCAGCAAGCGACTAGCATATATGGTGGCTAACTTATTCGCAAAAGAGAGCGAGAAGAGGAGGCAAGGC	TGCAGCAAGCGACTAGCATATGTGGTGGCTAACTTATACGCAAAAGAGAGCGAGAAGAGGAGGCAAGGC	69	719689837	ENA|MKGO01000007|MKGO01000007.1 Triticum urartu cultivar G1812 chromosome 7, whole genome shotgun sequence.
SNP_1155881	ENA|MKGO01000007|MKGO01000007.1	97.101	69	2	0	1	69	209140392	209140460	8.92e-25	117	ENA|MKGO01000007|MKGO01000007.1	63	67	67	0	97.1	1	1	TGCAGCAAGCGACTAGCATATATGGTGGCTAACTTATTCGCAAAAGAGAGCGAGAAGAGGAGGCAAGGC	TGCAGCAAGCGACTAGCATATGTGGTGGCTAACTTATACGCAAAAGAGAGCGAGAAGAGGAGGCAAGGC	69	719689837	ENA|MKGO01000007|MKGO01000007.1 Triticum urartu cultivar G1812 chromosome 7, whole genome shotgun sequence.
SNP_1155881	ENA|MKGO01000007|MKGO01000007.1	98.485	66	1	0	1	66	210516692	210516757	8.92e-25	117	ENA|MKGO01000007|MKGO01000007.1	63	65	65	0	98.48	1	1	TGCAGCAAGCGACTAGCATATATGGTGGCTAACTTATTCGCAAAAGAGAGCGAGAAGAGGAGGCAA	TGCAGCAAGCGACTAGCATATATGGTGGCTATCTTATTCGCAAAAGAGAGCGAGAAGAGGAGGCAA	69	719689837	ENA|MKGO01000007|MKGO01000007.1 Triticum urartu cultivar G1812 chromosome 7, whole genome shotgun sequence.
SNP_1155881	ENA|MKGO01000007|MKGO01000007.1	98.485	66	1	0	1	66	211253374	211253439	8.92e-25	117	ENA|MKGO01000007|MKGO01000007.1	63	65	65	0	98.48	1	1	TGCAGCAAGCGACTAGCATATATGGTGGCTAACTTATTCGCAAAAGAGAGCGAGAAGAGGAGGCAA	TGCAGCAAGCGACTAGCATATATGGTGGCTAACTTATACGCAAAAGAGAGCGAGAAGAGGAGGCAA	69	719689837	ENA|MKGO01000007|MKGO01000007.1 Triticum urartu cultivar G1812 chromosome 7, whole genome shotgun sequence.
SNP_1155881	ENA|MKGO01000007|MKGO01000007.1	98.485	66	1	0	1	66	211262907	211262972	8.92e-25	117	ENA|MKGO01000007|MKGO01000007.1	63	65	65	0	98.48	1	1	TGCAGCAAGCGACTAGCATATATGGTGGCTAACTTATTCGCAAAAGAGAGCGAGAAGAGGAGGCAA	TGCAGCAAGCGACTAGCATATATGGTGGCTAACTTATACGCAAAAGAGAGCGAGAAGAGGAGGCAA	69	719689837	ENA|MKGO01000007|MKGO01000007.1 Triticum urartu cultivar G1812 chromosome 7, whole genome shotgun sequence.
SNP_1155881	ENA|MKGO01000007|MKGO01000007.1	98.485	66	1	0	1	66	215080085	215080150	8.92e-25	117	ENA|MKGO01000007|MKGO01000007.1	63	65	65	0	98.48	1	1	TGCAGCAAGCGACTAGCATATATGGTGGCTAACTTATTCGCAAAAGAGAGCGAGAAGAGGAGGCAA	TGCAGCAAGCGACTAGCAGATATGGTGGCTAACTTATTCGCAAAAGAGAGCGAGAAGAGGAGGCAA	69	719689837	ENA|MKGO01000007|MKGO01000007.1 Triticum urartu cultivar G1812 chromosome 7, whole genome shotgun sequence.
SNP_1155881	ENA|MKGO01000007|MKGO01000007.1	100	63	0	0	1	63	215089731	215089793	8.92e-25	117	ENA|MKGO01000007|MKGO01000007.1	63	63	63	0	100	1	1	TGCAGCAAGCGACTAGCATATATGGTGGCTAACTTATTCGCAAAAGAGAGCGAGAAGAGGAGG	TGCAGCAAGCGACTAGCATATATGGTGGCTAACTTATTCGCAAAAGAGAGCGAGAAGAGGAGG	69	719689837	ENA|MKGO01000007|MKGO01000007.1 Triticum urartu cultivar G1812 chromosome 7, whole genome shotgun sequence.
SNP_1155881	ENA|MKGO01000007|MKGO01000007.1	98.485	66	1	0	1	66	216165302	216165367	8.92e-25	117	ENA|MKGO01000007|MKGO01000007.1	63	65	65	0	98.48	1	1	TGCAGCAAGCGACTAGCATATATGGTGGCTAACTTATTCGCAAAAGAGAGCGAGAAGAGGAGGCAA	TGCAGCAAGCGACTAGCAAATATGGTGGCTAACTTATTCGCAAAAGAGAGCGAGAAGAGGAGGCAA	69	719689837	ENA|MKGO01000007|MKGO01000007.1 Triticum urartu cultivar G1812 chromosome 7, whole genome shotgun sequence.
SNP_1155881	ENA|MKGO01000007|MKGO01000007.1	97.101	69	2	0	1	69	219055313	219055245	8.92e-25	117	ENA|MKGO01000007|MKGO01000007.1	63	67	67	0	97.1	1	-1	TGCAGCAAGCGACTAGCATATATGGTGGCTAACTTATTCGCAAAAGAGAGCGAGAAGAGGAGGCAAGGC	TGCAGCAAGCGACTAGCATATATGGTGGCTAACTTATTCGCAAAGGAGAGCGAGAAGAGGAGGCAAAGC	69	719689837	ENA|MKGO01000007|MKGO01000007.1 Triticum urartu cultivar G1812 chromosome 7, whole genome shotgun sequence.
SNP_1155881	ENA|MKGO01000007|MKGO01000007.1	98.485	66	1	0	1	66	220908024	220908089	8.92e-25	117	ENA|MKGO01000007|MKGO01000007.1	63	65	65	0	98.48	1	1	TGCAGCAAGCGACTAGCATATATGGTGGCTAACTTATTCGCAAAAGAGAGCGAGAAGAGGAGGCAA	TGCAGCAAGCGACTAGCATATATGGTGGCTAACCTATTCGCAAAAGAGAGCGAGAAGAGGAGGCAA	69	719689837	ENA|MKGO01000007|MKGO01000007.1 Triticum urartu cultivar G1812 chromosome 7, whole genome shotgun sequence.
SNP_1155881	ENA|MKGO01000007|MKGO01000007.1	98.485	66	1	0	1	66	221103742	221103807	8.92e-25	117	ENA|MKGO01000007|MKGO01000007.1	63	65	65	0	98.48	1	1	TGCAGCAAGCGACTAGCATATATGGTGGCTAACTTATTCGCAAAAGAGAGCGAGAAGAGGAGGCAA	TGCAGCAAGCGACTAGCATATATGGTGGCTAACCTATTCGCAAAAGAGAGCGAGAAGAGGAGGCAA	69	719689837	ENA|MKGO01000007|MKGO01000007.1 Triticum urartu cultivar G1812 chromosome 7, whole genome shotgun sequence.
SNP_1155881	ENA|MKGO01000007|MKGO01000007.1	97.101	69	2	0	1	69	221650213	221650145	8.92e-25	117	ENA|MKGO01000007|MKGO01000007.1	63	67	67	0	97.1	1	-1	TGCAGCAAGCGACTAGCATATATGGTGGCTAACTTATTCGCAAAAGAGAGCGAGAAGAGGAGGCAAGGC	TGCAGCAAGCGACTAGCAAATATGGTGGCTAACTTATTCGCAAAAGAGAGCGAGAAGAGGAGGCAAAGC	69	719689837	ENA|MKGO01000007|MKGO01000007.1 Triticum urartu cultivar G1812 chromosome 7, whole genome shotgun sequence.
SNP_1155881	ENA|MKGO01000007|MKGO01000007.1	97.101	69	2	0	1	69	225207566	225207498	8.92e-25	117	ENA|MKGO01000007|MKGO01000007.1	63	67	67	0	97.1	1	-1	TGCAGCAAGCGACTAGCATATATGGTGGCTAACTTATTCGCAAAAGAGAGCGAGAAGAGGAGGCAAGGC	TGCAGCAAGCGACTAGCATATGTGGTGGCTAACTTATCCGCAAAAGAGAGCGAGAAGAGGAGGCAAGGC	69	719689837	ENA|MKGO01000007|MKGO01000007.1 Triticum urartu cultivar G1812 chromosome 7, whole genome shotgun sequence.
SNP_1155881	ENA|MKGO01000007|MKGO01000007.1	97.101	69	2	0	1	69	225227150	225227082	8.92e-25	117	ENA|MKGO01000007|MKGO01000007.1	63	67	67	0	97.1	1	-1	TGCAGCAAGCGACTAGCATATATGGTGGCTAACTTATTCGCAAAAGAGAGCGAGAAGAGGAGGCAAGGC	TGCAGCAAGCGACTAGCATATGTGGTGGCTAACTTATCCGCAAAAGAGAGCGAGAAGAGGAGGCAAGGC	69	719689837	ENA|MKGO01000007|MKGO01000007.1 Triticum urartu cultivar G1812 chromosome 7, whole genome shotgun sequence.
SNP_1155881	ENA|MKGO01000007|MKGO01000007.1	97.101	69	2	0	1	69	225663189	225663121	8.92e-25	117	ENA|MKGO01000007|MKGO01000007.1	63	67	67	0	97.1	1	-1	TGCAGCAAGCGACTAGCATATATGGTGGCTAACTTATTCGCAAAAGAGAGCGAGAAGAGGAGGCAAGGC	TGCAGCAAGCGACTAGCATATATGGTGGCTAACCTATTCGCAAAAGAGAGCGAGAAGAGGAGGCAAAGC	69	719689837	ENA|MKGO01000007|MKGO01000007.1 Triticum urartu cultivar G1812 chromosome 7, whole genome shotgun sequence.
SNP_1155881	ENA|MKGO01000007|MKGO01000007.1	97.101	69	2	0	1	69	227545642	227545710	8.92e-25	117	ENA|MKGO01000007|MKGO01000007.1	63	67	67	0	97.1	1	1	TGCAGCAAGCGACTAGCATATATGGTGGCTAACTTATTCGCAAAAGAGAGCGAGAAGAGGAGGCAAGGC	TGCAGCAAGCGACTAGCATATATGGTGGCTAAATTATTCGCAAAGGAGAGCGAGAAGAGGAGGCAAGGC	69	719689837	ENA|MKGO01000007|MKGO01000007.1 Triticum urartu cultivar G1812 chromosome 7, whole genome shotgun sequence.
SNP_1155881	ENA|MKGO01000007|MKGO01000007.1	98.485	66	1	0	1	66	230765877	230765942	8.92e-25	117	ENA|MKGO01000007|MKGO01000007.1	63	65	65	0	98.48	1	1	TGCAGCAAGCGACTAGCATATATGGTGGCTAACTTATTCGCAAAAGAGAGCGAGAAGAGGAGGCAA	TGCAGCAAGCGACTAGCATATATGGTGGCTAACTTATTCGCAAAGGAGAGCGAGAAGAGGAGGCAA	69	719689837	ENA|MKGO01000007|MKGO01000007.1 Triticum urartu cultivar G1812 chromosome 7, whole genome shotgun sequence.
SNP_1155881	ENA|MKGO01000007|MKGO01000007.1	97.101	69	2	0	1	69	233143434	233143366	8.92e-25	117	ENA|MKGO01000007|MKGO01000007.1	63	67	67	0	97.1	1	-1	TGCAGCAAGCGACTAGCATATATGGTGGCTAACTTATTCGCAAAAGAGAGCGAGAAGAGGAGGCAAGGC	TGCAGCAAGCGACTAGCATATATGGTGGCTAACTTATTCGCAAGGGAGAGCGAGAAGAGGAGGCAAGGC	69	719689837	ENA|MKGO01000007|MKGO01000007.1 Triticum urartu cultivar G1812 chromosome 7, whole genome shotgun sequence.
SNP_1155881	ENA|MKGO01000007|MKGO01000007.1	97.101	69	2	0	1	69	233538958	233538890	8.92e-25	117	ENA|MKGO01000007|MKGO01000007.1	63	67	67	0	97.1	1	-1	TGCAGCAAGCGACTAGCATATATGGTGGCTAACTTATTCGCAAAAGAGAGCGAGAAGAGGAGGCAAGGC	TGCAGCAAACGACTAGCATATATGGTGGCTAACTTATTCGCAAAAGAGAGCGAGAAGAGGAGGCAAAGC	69	719689837	ENA|MKGO01000007|MKGO01000007.1 Triticum urartu cultivar G1812 chromosome 7, whole genome shotgun sequence.
SNP_1155881	ENA|MKGO01000007|MKGO01000007.1	97.101	69	2	0	1	69	234387816	234387748	8.92e-25	117	ENA|MKGO01000007|MKGO01000007.1	63	67	67	0	97.1	1	-1	TGCAGCAAGCGACTAGCATATATGGTGGCTAACTTATTCGCAAAAGAGAGCGAGAAGAGGAGGCAAGGC	TGCAGCAAGTGACTAGCATATATGGTGGCTAACTTATTCGCAAAAGAGAGCGAGAAGAGGAGGCAAAGC	69	719689837	ENA|MKGO01000007|MKGO01000007.1 Triticum urartu cultivar G1812 chromosome 7, whole genome shotgun sequence.
SNP_1155881	ENA|MKGO01000007|MKGO01000007.1	97.101	69	2	0	1	69	234409751	234409683	8.92e-25	117	ENA|MKGO01000007|MKGO01000007.1	63	67	67	0	97.1	1	-1	TGCAGCAAGCGACTAGCATATATGGTGGCTAACTTATTCGCAAAAGAGAGCGAGAAGAGGAGGCAAGGC	TGCAGCAAGCGACTAGCATATATGGTGGCTAACTTATTCGCAAAAGAGAGCGAGAAGAGGGGGCAAAGC	69	719689837	ENA|MKGO01000007|MKGO01000007.1 Triticum urartu cultivar G1812 chromosome 7, whole genome shotgun sequence.
SNP_1155881	ENA|MKGO01000007|MKGO01000007.1	97.101	69	2	0	1	69	234419372	234419304	8.92e-25	117	ENA|MKGO01000007|MKGO01000007.1	63	67	67	0	97.1	1	-1	TGCAGCAAGCGACTAGCATATATGGTGGCTAACTTATTCGCAAAAGAGAGCGAGAAGAGGAGGCAAGGC	TGCAGCAAGCGACTAGCATATATGGTGGCTAACTTATTCGCAAAAGAGAGCGAGAAGAGGGGGCAAAGC	69	719689837	ENA|MKGO01000007|MKGO01000007.1 Triticum urartu cultivar G1812 chromosome 7, whole genome shotgun sequence.
SNP_1155881	ENA|MKGO01000007|MKGO01000007.1	98.485	66	1	0	1	66	234656320	234656385	8.92e-25	117	ENA|MKGO01000007|MKGO01000007.1	63	65	65	0	98.48	1	1	TGCAGCAAGCGACTAGCATATATGGTGGCTAACTTATTCGCAAAAGAGAGCGAGAAGAGGAGGCAA	TGCAGCAAACGACTAGCATATATGGTGGCTAACTTATTCGCAAAAGAGAGCGAGAAGAGGAGGCAA	69	719689837	ENA|MKGO01000007|MKGO01000007.1 Triticum urartu cultivar G1812 chromosome 7, whole genome shotgun sequence.
SNP_1155881	ENA|MKGO01000007|MKGO01000007.1	97.101	69	2	0	1	69	234731566	234731498	8.92e-25	117	ENA|MKGO01000007|MKGO01000007.1	63	67	67	0	97.1	1	-1	TGCAGCAAGCGACTAGCATATATGGTGGCTAACTTATTCGCAAAAGAGAGCGAGAAGAGGAGGCAAGGC	TGCAGCAAACGACTAGCATATATGGTGGCTAACTTATTCGCAAAAGAGAGCGAGAAGAGGAGGCAAAGC	69	719689837	ENA|MKGO01000007|MKGO01000007.1 Triticum urartu cultivar G1812 chromosome 7, whole genome shotgun sequence.
SNP_1155881	ENA|MKGO01000007|MKGO01000007.1	97.101	69	2	0	1	69	234907722	234907654	8.92e-25	117	ENA|MKGO01000007|MKGO01000007.1	63	67	67	0	97.1	1	-1	TGCAGCAAGCGACTAGCATATATGGTGGCTAACTTATTCGCAAAAGAGAGCGAGAAGAGGAGGCAAGGC	TGCAGCAAGCGACTAGCATATATGGTGGCTAACTTATTCGCAAAAGAGAGCGAGAGGAGGAGGCAAAGC	69	719689837	ENA|MKGO01000007|MKGO01000007.1 Triticum urartu cultivar G1812 chromosome 7, whole genome shotgun sequence.
SNP_1155881	ENA|MKGO01000007|MKGO01000007.1	97.101	69	2	0	1	69	234918746	234918678	8.92e-25	117	ENA|MKGO01000007|MKGO01000007.1	63	67	67	0	97.1	1	-1	TGCAGCAAGCGACTAGCATATATGGTGGCTAACTTATTCGCAAAAGAGAGCGAGAAGAGGAGGCAAGGC	TGCAGCAAGCGACTAGCATATATGGTGGCTAACTTATTCGCAAAAGAGAGCGAGAGGAGGAGGCAAAGC	69	719689837	ENA|MKGO01000007|MKGO01000007.1 Triticum urartu cultivar G1812 chromosome 7, whole genome shotgun sequence.
SNP_1155881	ENA|MKGO01000007|MKGO01000007.1	97.101	69	2	0	1	69	241289248	241289180	8.92e-25	117	ENA|MKGO01000007|MKGO01000007.1	63	67	67	0	97.1	1	-1	TGCAGCAAGCGACTAGCATATATGGTGGCTAACTTATTCGCAAAAGAGAGCGAGAAGAGGAGGCAAGGC	TGCAGCAAGCGACTAGCAAATATGGTGGCTAACTTATTCGCAAAAGAGAGCGAGAAGAGGAGGCAAAGC	69	719689837	ENA|MKGO01000007|MKGO01000007.1 Triticum urartu cultivar G1812 chromosome 7, whole genome shotgun sequence.
SNP_1155881	ENA|MKGO01000007|MKGO01000007.1	98.485	66	1	0	1	66	244291804	244291869	8.92e-25	117	ENA|MKGO01000007|MKGO01000007.1	63	65	65	0	98.48	1	1	TGCAGCAAGCGACTAGCATATATGGTGGCTAACTTATTCGCAAAAGAGAGCGAGAAGAGGAGGCAA	TGCAGCAAGCGACTAGCATATATGGTGGCTAACTTATTCGTAAAAGAGAGCGAGAAGAGGAGGCAA	69	719689837	ENA|MKGO01000007|MKGO01000007.1 Triticum urartu cultivar G1812 chromosome 7, whole genome shotgun sequence.
SNP_1155881	ENA|MKGO01000007|MKGO01000007.1	98.485	66	1	0	1	66	246978250	246978185	8.92e-25	117	ENA|MKGO01000007|MKGO01000007.1	63	65	65	0	98.48	1	-1	TGCAGCAAGCGACTAGCATATATGGTGGCTAACTTATTCGCAAAAGAGAGCGAGAAGAGGAGGCAA	TGCAGCAAGCGACTAGCAAATATGGTGGCTAACTTATTCGCAAAAGAGAGCGAGAAGAGGAGGCAA	69	719689837	ENA|MKGO01000007|MKGO01000007.1 Triticum urartu cultivar G1812 chromosome 7, whole genome shotgun sequence.
SNP_1155881	ENA|MKGO01000007|MKGO01000007.1	97.101	69	2	0	1	69	246987877	246987809	8.92e-25	117	ENA|MKGO01000007|MKGO01000007.1	63	67	67	0	97.1	1	-1	TGCAGCAAGCGACTAGCATATATGGTGGCTAACTTATTCGCAAAAGAGAGCGAGAAGAGGAGGCAAGGC	TGCAGCAAGCGACTAGCAAATATGGTGGCTAACTTATTCGCAAAAGAGAGCGAGAAGAGGAGGCAAAGC	69	719689837	ENA|MKGO01000007|MKGO01000007.1 Triticum urartu cultivar G1812 chromosome 7, whole genome shotgun sequence.
SNP_1155881	ENA|MKGO01000007|MKGO01000007.1	97.101	69	2	0	1	69	247420908	247420840	8.92e-25	117	ENA|MKGO01000007|MKGO01000007.1	63	67	67	0	97.1	1	-1	TGCAGCAAGCGACTAGCATATATGGTGGCTAACTTATTCGCAAAAGAGAGCGAGAAGAGGAGGCAAGGC	TGCAGCAAGCGACTAGCATGTATGGTGGCTAACTTATTCGCAAAAGAGAGCGAGAAGAGGAGGCAAAGC	69	719689837	ENA|MKGO01000007|MKGO01000007.1 Triticum urartu cultivar G1812 chromosome 7, whole genome shotgun sequence.
SNP_1155881	ENA|MKGO01000007|MKGO01000007.1	97.101	69	2	0	1	69	247670863	247670795	8.92e-25	117	ENA|MKGO01000007|MKGO01000007.1	63	67	67	0	97.1	1	-1	TGCAGCAAGCGACTAGCATATATGGTGGCTAACTTATTCGCAAAAGAGAGCGAGAAGAGGAGGCAAGGC	TGCAGCAAGCGACTAGCATGTATGGTGGCTAACTTATTCGCAAAAGAGAGCGAGAAGAGGAGGCAAAGC	69	719689837	ENA|MKGO01000007|MKGO01000007.1 Triticum urartu cultivar G1812 chromosome 7, whole genome shotgun sequence.
SNP_1155881	ENA|MKGO01000007|MKGO01000007.1	97.101	69	2	0	1	69	258938882	258938950	8.92e-25	117	ENA|MKGO01000007|MKGO01000007.1	63	67	67	0	97.1	1	1	TGCAGCAAGCGACTAGCATATATGGTGGCTAACTTATTCGCAAAAGAGAGCGAGAAGAGGAGGCAAGGC	TGCAGCAAGCGACTAGCATATGTGGTGGCTAACTTATACGCAAAAGAGAGCGAGAAGAGGAGGCAAGGC	69	719689837	ENA|MKGO01000007|MKGO01000007.1 Triticum urartu cultivar G1812 chromosome 7, whole genome shotgun sequence.
SNP_1155881	ENA|MKGO01000007|MKGO01000007.1	98.485	66	1	0	1	66	269848318	269848383	8.92e-25	117	ENA|MKGO01000007|MKGO01000007.1	63	65	65	0	98.48	1	1	TGCAGCAAGCGACTAGCATATATGGTGGCTAACTTATTCGCAAAAGAGAGCGAGAAGAGGAGGCAA	TGCAGCAAGTGACTAGCATATATGGTGGCTAACTTATTCGCAAAAGAGAGCGAGAAGAGGAGGCAA	69	719689837	ENA|MKGO01000007|MKGO01000007.1 Triticum urartu cultivar G1812 chromosome 7, whole genome shotgun sequence.
SNP_1155881	ENA|MKGO01000007|MKGO01000007.1	97.101	69	2	0	1	69	270867112	270867044	8.92e-25	117	ENA|MKGO01000007|MKGO01000007.1	63	67	67	0	97.1	1	-1	TGCAGCAAGCGACTAGCATATATGGTGGCTAACTTATTCGCAAAAGAGAGCGAGAAGAGGAGGCAAGGC	TGCAGCAAGCGACTAGCATATGTGGTGGCTAACTTATCCGCAAAAGAGAGCGAGAAGAGGAGGCAAGGC	69	719689837	ENA|MKGO01000007|MKGO01000007.1 Triticum urartu cultivar G1812 chromosome 7, whole genome shotgun sequence.
SNP_1155881	ENA|MKGO01000007|MKGO01000007.1	97.101	69	2	0	1	69	270876925	270876857	8.92e-25	117	ENA|MKGO01000007|MKGO01000007.1	63	67	67	0	97.1	1	-1	TGCAGCAAGCGACTAGCATATATGGTGGCTAACTTATTCGCAAAAGAGAGCGAGAAGAGGAGGCAAGGC	TGCAGCAAGCGACTAGCATATGTGGTGGCTAACTTATACGCAAAAGAGAGCGAGAAGAGGAGGCAAGGC	69	719689837	ENA|MKGO01000007|MKGO01000007.1 Triticum urartu cultivar G1812 chromosome 7, whole genome shotgun sequence.
SNP_1155881	ENA|MKGO01000007|MKGO01000007.1	97.101	69	2	0	1	69	271432490	271432422	8.92e-25	117	ENA|MKGO01000007|MKGO01000007.1	63	67	67	0	97.1	1	-1	TGCAGCAAGCGACTAGCATATATGGTGGCTAACTTATTCGCAAAAGAGAGCGAGAAGAGGAGGCAAGGC	TGCAGCAAGCGACTAGCATATATGGTGGCTATCTTATTCGCAAAAGAGAGCGAGAAGAGGAGGCAAAGC	69	719689837	ENA|MKGO01000007|MKGO01000007.1 Triticum urartu cultivar G1812 chromosome 7, whole genome shotgun sequence.
SNP_1155881	ENA|MKGO01000007|MKGO01000007.1	97.101	69	2	0	1	69	273538205	273538137	8.92e-25	117	ENA|MKGO01000007|MKGO01000007.1	63	67	67	0	97.1	1	-1	TGCAGCAAGCGACTAGCATATATGGTGGCTAACTTATTCGCAAAAGAGAGCGAGAAGAGGAGGCAAGGC	TGCAGCAAGCGACTAGCAAATATGGTGGCTAACTTATTCGCAAAAGAGAGCGAGAAGAGGAGGCAAAGC	69	719689837	ENA|MKGO01000007|MKGO01000007.1 Triticum urartu cultivar G1812 chromosome 7, whole genome shotgun sequence.
SNP_1155881	ENA|MKGO01000007|MKGO01000007.1	98.485	66	1	0	1	66	274074470	274074535	8.92e-25	117	ENA|MKGO01000007|MKGO01000007.1	63	65	65	0	98.48	1	1	TGCAGCAAGCGACTAGCATATATGGTGGCTAACTTATTCGCAAAAGAGAGCGAGAAGAGGAGGCAA	TGCAGCAAGCGACTAGCAAATATGGTGGCTAACTTATTCGCAAAAGAGAGCGAGAAGAGGAGGCAA	69	719689837	ENA|MKGO01000007|MKGO01000007.1 Triticum urartu cultivar G1812 chromosome 7, whole genome shotgun sequence.
SNP_1155881	ENA|MKGO01000007|MKGO01000007.1	97.101	69	2	0	1	69	278866473	278866405	8.92e-25	117	ENA|MKGO01000007|MKGO01000007.1	63	67	67	0	97.1	1	-1	TGCAGCAAGCGACTAGCATATATGGTGGCTAACTTATTCGCAAAAGAGAGCGAGAAGAGGAGGCAAGGC	TGCAGCAAGCGACTAGCAAATATGGTGGCTAACTTATTCGCAAAAGAGAGCGAGAAGAGGAGGCAAAGC	69	719689837	ENA|MKGO01000007|MKGO01000007.1 Triticum urartu cultivar G1812 chromosome 7, whole genome shotgun sequence.
SNP_1155881	ENA|MKGO01000007|MKGO01000007.1	98.485	66	1	0	1	66	282111485	282111550	8.92e-25	117	ENA|MKGO01000007|MKGO01000007.1	63	65	65	0	98.48	1	1	TGCAGCAAGCGACTAGCATATATGGTGGCTAACTTATTCGCAAAAGAGAGCGAGAAGAGGAGGCAA	TGCAGCAAGCGACTAGCATATATGGTGGCTAACTTATTCGCAAAAGAGAGCGAGAAGAGAAGGCAA	69	719689837	ENA|MKGO01000007|MKGO01000007.1 Triticum urartu cultivar G1812 chromosome 7, whole genome shotgun sequence.
SNP_1155881	ENA|MKGO01000007|MKGO01000007.1	98.485	66	1	0	1	66	286713673	286713738	8.92e-25	117	ENA|MKGO01000007|MKGO01000007.1	63	65	65	0	98.48	1	1	TGCAGCAAGCGACTAGCATATATGGTGGCTAACTTATTCGCAAAAGAGAGCGAGAAGAGGAGGCAA	TGCAGCAAGCGACTAGCATATATGGTGGCTAACTTATTCGCAAAAGAGAGCAAGAAGAGGAGGCAA	69	719689837	ENA|MKGO01000007|MKGO01000007.1 Triticum urartu cultivar G1812 chromosome 7, whole genome shotgun sequence.
SNP_1155881	ENA|MKGO01000007|MKGO01000007.1	97.101	69	2	0	1	69	288705037	288704969	8.92e-25	117	ENA|MKGO01000007|MKGO01000007.1	63	67	67	0	97.1	1	-1	TGCAGCAAGCGACTAGCATATATGGTGGCTAACTTATTCGCAAAAGAGAGCGAGAAGAGGAGGCAAGGC	TGCAGCAAGCGACTAGCAAATATGGTGGCTAACTTATTCGCAAAAGAGAGCGAGAAGAGGAGGCAAAGC	69	719689837	ENA|MKGO01000007|MKGO01000007.1 Triticum urartu cultivar G1812 chromosome 7, whole genome shotgun sequence.
SNP_1155881	ENA|MKGO01000007|MKGO01000007.1	98.485	66	1	0	1	66	289603630	289603695	8.92e-25	117	ENA|MKGO01000007|MKGO01000007.1	63	65	65	0	98.48	1	1	TGCAGCAAGCGACTAGCATATATGGTGGCTAACTTATTCGCAAAAGAGAGCGAGAAGAGGAGGCAA	TGCAGCAAGCGACTAGCATATATGGTGGCTAACTTATTCGCAAATGAGAGCGAGAAGAGGAGGCAA	69	719689837	ENA|MKGO01000007|MKGO01000007.1 Triticum urartu cultivar G1812 chromosome 7, whole genome shotgun sequence.
SNP_1155881	ENA|MKGO01000007|MKGO01000007.1	98.485	66	1	0	1	66	291199490	291199555	8.92e-25	117	ENA|MKGO01000007|MKGO01000007.1	63	65	65	0	98.48	1	1	TGCAGCAAGCGACTAGCATATATGGTGGCTAACTTATTCGCAAAAGAGAGCGAGAAGAGGAGGCAA	TGCAGCAAGCGACTAGCAAATATGGTGGCTAACTTATTCGCAAAAGAGAGCGAGAAGAGGAGGCAA	69	719689837	ENA|MKGO01000007|MKGO01000007.1 Triticum urartu cultivar G1812 chromosome 7, whole genome shotgun sequence.
SNP_1155881	ENA|MKGO01000007|MKGO01000007.1	97.101	69	2	0	1	69	296526275	296526207	8.92e-25	117	ENA|MKGO01000007|MKGO01000007.1	63	67	67	0	97.1	1	-1	TGCAGCAAGCGACTAGCATATATGGTGGCTAACTTATTCGCAAAAGAGAGCGAGAAGAGGAGGCAAGGC	TGCAGCAAGCGACTAGCATATATGGTGGCTAACTTATTCGCAAAGGAGAGCGAGAAGAGGAGGCAAAGC	69	719689837	ENA|MKGO01000007|MKGO01000007.1 Triticum urartu cultivar G1812 chromosome 7, whole genome shotgun sequence.
SNP_1155881	ENA|MKGO01000007|MKGO01000007.1	97.101	69	2	0	1	69	303940029	303940097	8.92e-25	117	ENA|MKGO01000007|MKGO01000007.1	63	67	67	0	97.1	1	1	TGCAGCAAGCGACTAGCATATATGGTGGCTAACTTATTCGCAAAAGAGAGCGAGAAGAGGAGGCAAGGC	TGCAGCAAGCGACTAGCATATGTGGTGGCTAACTTATCCGCAAAAGAGAGCGAGAAGAGGAGGCAAGGC	69	719689837	ENA|MKGO01000007|MKGO01000007.1 Triticum urartu cultivar G1812 chromosome 7, whole genome shotgun sequence.
SNP_1155881	ENA|MKGO01000007|MKGO01000007.1	97.101	69	2	0	1	69	320884879	320884811	8.92e-25	117	ENA|MKGO01000007|MKGO01000007.1	63	67	67	0	97.1	1	-1	TGCAGCAAGCGACTAGCATATATGGTGGCTAACTTATTCGCAAAAGAGAGCGAGAAGAGGAGGCAAGGC	TGCAGCAAGCGACTAGCAAATATGGTGGCTAACTTATTCGCAAAAGAGAGCGAGAAGAGGAGGCAAAGC	69	719689837	ENA|MKGO01000007|MKGO01000007.1 Triticum urartu cultivar G1812 chromosome 7, whole genome shotgun sequence.
SNP_1155881	ENA|MKGO01000007|MKGO01000007.1	98.485	66	1	0	1	66	325854362	325854427	8.92e-25	117	ENA|MKGO01000007|MKGO01000007.1	63	65	65	0	98.48	1	1	TGCAGCAAGCGACTAGCATATATGGTGGCTAACTTATTCGCAAAAGAGAGCGAGAAGAGGAGGCAA	TGCAGCAAGCGACTAGCAAATATGGTGGCTAACTTATTCGCAAAAGAGAGCGAGAAGAGGAGGCAA	69	719689837	ENA|MKGO01000007|MKGO01000007.1 Triticum urartu cultivar G1812 chromosome 7, whole genome shotgun sequence.
SNP_1155881	ENA|MKGO01000007|MKGO01000007.1	97.101	69	2	0	1	69	329942643	329942575	8.92e-25	117	ENA|MKGO01000007|MKGO01000007.1	63	67	67	0	97.1	1	-1	TGCAGCAAGCGACTAGCATATATGGTGGCTAACTTATTCGCAAAAGAGAGCGAGAAGAGGAGGCAAGGC	TGCAGCAAGCGACTAGCATATATGGTGGCTAACTTATTCGCAAAGGAGAGCGAGAAGAGGAGGCAAAGC	69	719689837	ENA|MKGO01000007|MKGO01000007.1 Triticum urartu cultivar G1812 chromosome 7, whole genome shotgun sequence.
SNP_1155881	ENA|MKGO01000007|MKGO01000007.1	97.101	69	2	0	1	69	331806942	331806874	8.92e-25	117	ENA|MKGO01000007|MKGO01000007.1	63	67	67	0	97.1	1	-1	TGCAGCAAGCGACTAGCATATATGGTGGCTAACTTATTCGCAAAAGAGAGCGAGAAGAGGAGGCAAGGC	TGCAGCAAGCGACTAGCAAATATGGTGGCTAACTTATTCGCAAAAGAGAGCGAGAAGAGGAGGCAAAGC	69	719689837	ENA|MKGO01000007|MKGO01000007.1 Triticum urartu cultivar G1812 chromosome 7, whole genome shotgun sequence.
SNP_1155881	ENA|MKGO01000007|MKGO01000007.1	97.101	69	2	0	1	69	331873985	331873917	8.92e-25	117	ENA|MKGO01000007|MKGO01000007.1	63	67	67	0	97.1	1	-1	TGCAGCAAGCGACTAGCATATATGGTGGCTAACTTATTCGCAAAAGAGAGCGAGAAGAGGAGGCAAGGC	TGCAGCAAGCGACTAGCAAATATGGTGGCTAACTTATTCGCAAAAGAGAGCGAGAAGAGGAGGCAAAGC	69	719689837	ENA|MKGO01000007|MKGO01000007.1 Triticum urartu cultivar G1812 chromosome 7, whole genome shotgun sequence.
SNP_1155881	ENA|MKGO01000007|MKGO01000007.1	98.485	66	1	0	1	66	338894499	338894564	8.92e-25	117	ENA|MKGO01000007|MKGO01000007.1	63	65	65	0	98.48	1	1	TGCAGCAAGCGACTAGCATATATGGTGGCTAACTTATTCGCAAAAGAGAGCGAGAAGAGGAGGCAA	TGCAGCAAGCGACTAGCAAATATGGTGGCTAACTTATTCGCAAAAGAGAGCGAGAAGAGGAGGCAA	69	719689837	ENA|MKGO01000007|MKGO01000007.1 Triticum urartu cultivar G1812 chromosome 7, whole genome shotgun sequence.
SNP_1155881	ENA|MKGO01000007|MKGO01000007.1	98.485	66	1	0	1	66	338904106	338904171	8.92e-25	117	ENA|MKGO01000007|MKGO01000007.1	63	65	65	0	98.48	1	1	TGCAGCAAGCGACTAGCATATATGGTGGCTAACTTATTCGCAAAAGAGAGCGAGAAGAGGAGGCAA	TGCAGCAAGCGACTAGCAAATATGGTGGCTAACTTATTCGCAAAAGAGAGCGAGAAGAGGAGGCAA	69	719689837	ENA|MKGO01000007|MKGO01000007.1 Triticum urartu cultivar G1812 chromosome 7, whole genome shotgun sequence.
SNP_1155881	ENA|MKGO01000007|MKGO01000007.1	98.485	66	1	0	1	66	341469186	341469251	8.92e-25	117	ENA|MKGO01000007|MKGO01000007.1	63	65	65	0	98.48	1	1	TGCAGCAAGCGACTAGCATATATGGTGGCTAACTTATTCGCAAAAGAGAGCGAGAAGAGGAGGCAA	TGCAGCAAGCGACTAGCATATATGGTGGCTAACTTATTCGCAAAGGAGAGCGAGAAGAGGAGGCAA	69	719689837	ENA|MKGO01000007|MKGO01000007.1 Triticum urartu cultivar G1812 chromosome 7, whole genome shotgun sequence.
SNP_1155881	ENA|MKGO01000007|MKGO01000007.1	97.101	69	2	0	1	69	351023897	351023829	8.92e-25	117	ENA|MKGO01000007|MKGO01000007.1	63	67	67	0	97.1	1	-1	TGCAGCAAGCGACTAGCATATATGGTGGCTAACTTATTCGCAAAAGAGAGCGAGAAGAGGAGGCAAGGC	TGCAGCAAGCGACTAGCATATGTGGTGGCTAACTTATCCGCAAAAGAGAGCGAGAAGAGGAGGCAAGGC	69	719689837	ENA|MKGO01000007|MKGO01000007.1 Triticum urartu cultivar G1812 chromosome 7, whole genome shotgun sequence.
SNP_1155881	ENA|MKGO01000007|MKGO01000007.1	97.101	69	2	0	1	69	351033787	351033719	8.92e-25	117	ENA|MKGO01000007|MKGO01000007.1	63	67	67	0	97.1	1	-1	TGCAGCAAGCGACTAGCATATATGGTGGCTAACTTATTCGCAAAAGAGAGCGAGAAGAGGAGGCAAGGC	TGCAGCAAGCGACTAGCATATGTGGTGGCTAACTTATCCGCAAAAGAGAGCGAGAAGAGGAGGCAAGGC	69	719689837	ENA|MKGO01000007|MKGO01000007.1 Triticum urartu cultivar G1812 chromosome 7, whole genome shotgun sequence.
SNP_1155881	ENA|MKGO01000007|MKGO01000007.1	98.485	66	1	0	1	66	352070742	352070807	8.92e-25	117	ENA|MKGO01000007|MKGO01000007.1	63	65	65	0	98.48	1	1	TGCAGCAAGCGACTAGCATATATGGTGGCTAACTTATTCGCAAAAGAGAGCGAGAAGAGGAGGCAA	TGCAGCAAGCGACTAGCATATATGGTGGCTAACTTATTCGCAAAAGAGAGCGAGAAGAGGGGGCAA	69	719689837	ENA|MKGO01000007|MKGO01000007.1 Triticum urartu cultivar G1812 chromosome 7, whole genome shotgun sequence.
SNP_1155881	ENA|MKGO01000007|MKGO01000007.1	97.101	69	2	0	1	69	355457069	355457001	8.92e-25	117	ENA|MKGO01000007|MKGO01000007.1	63	67	67	0	97.1	1	-1	TGCAGCAAGCGACTAGCATATATGGTGGCTAACTTATTCGCAAAAGAGAGCGAGAAGAGGAGGCAAGGC	TGCAGCAAGCGACTAGCATATATGGTGGCTATCTTATTCACAAAAGAGAGCGAGAAGAGGAGGCAAGGC	69	719689837	ENA|MKGO01000007|MKGO01000007.1 Triticum urartu cultivar G1812 chromosome 7, whole genome shotgun sequence.
SNP_1155881	ENA|MKGO01000007|MKGO01000007.1	97.101	69	2	0	1	69	355463219	355463151	8.92e-25	117	ENA|MKGO01000007|MKGO01000007.1	63	67	67	0	97.1	1	-1	TGCAGCAAGCGACTAGCATATATGGTGGCTAACTTATTCGCAAAAGAGAGCGAGAAGAGGAGGCAAGGC	TGCAGCAAGCGACTAGCATATATGGAGGCTATCTTATTCGCAAAAGAGAGCGAGAAGAGGAGGCAAGGC	69	719689837	ENA|MKGO01000007|MKGO01000007.1 Triticum urartu cultivar G1812 chromosome 7, whole genome shotgun sequence.
SNP_1155881	ENA|MKGO01000007|MKGO01000007.1	97.101	69	2	0	1	69	359124552	359124484	8.92e-25	117	ENA|MKGO01000007|MKGO01000007.1	63	67	67	0	97.1	1	-1	TGCAGCAAGCGACTAGCATATATGGTGGCTAACTTATTCGCAAAAGAGAGCGAGAAGAGGAGGCAAGGC	TGCAGCAAGCGACTAGCAAATATGGTGGCTAACTTATTCGCAAAAGAGAGCGAGAAGAGGAGGCAAAGC	69	719689837	ENA|MKGO01000007|MKGO01000007.1 Triticum urartu cultivar G1812 chromosome 7, whole genome shotgun sequence.
SNP_1155881	ENA|MKGO01000007|MKGO01000007.1	98.485	66	1	0	1	66	362550634	362550699	8.92e-25	117	ENA|MKGO01000007|MKGO01000007.1	63	65	65	0	98.48	1	1	TGCAGCAAGCGACTAGCATATATGGTGGCTAACTTATTCGCAAAAGAGAGCGAGAAGAGGAGGCAA	TGCAGCAAGCGACTAGCATATATGGTGGCTAACTTATTCGCAAAGGAGAGCGAGAAGAGGAGGCAA	69	719689837	ENA|MKGO01000007|MKGO01000007.1 Triticum urartu cultivar G1812 chromosome 7, whole genome shotgun sequence.
SNP_1155881	ENA|MKGO01000007|MKGO01000007.1	97.101	69	2	0	1	69	366474983	366474915	8.92e-25	117	ENA|MKGO01000007|MKGO01000007.1	63	67	67	0	97.1	1	-1	TGCAGCAAGCGACTAGCATATATGGTGGCTAACTTATTCGCAAAAGAGAGCGAGAAGAGGAGGCAAGGC	TGCAGCAAGCGACTAGCATATGTGGTGGCTAACTTATACGCAAAAGAGAGCGAGAAGAGGAGGCAAGGC	69	719689837	ENA|MKGO01000007|MKGO01000007.1 Triticum urartu cultivar G1812 chromosome 7, whole genome shotgun sequence.
SNP_1155881	ENA|MKGO01000007|MKGO01000007.1	97.101	69	2	0	1	69	367718315	367718383	8.92e-25	117	ENA|MKGO01000007|MKGO01000007.1	63	67	67	0	97.1	1	1	TGCAGCAAGCGACTAGCATATATGGTGGCTAACTTATTCGCAAAAGAGAGCGAGAAGAGGAGGCAAGGC	TGCAGCAAGCGACTAGCATATGTGGTGGCTAACTTATACGCAAAAGAGAGCGAGAAGAGGAGGCAAGGC	69	719689837	ENA|MKGO01000007|MKGO01000007.1 Triticum urartu cultivar G1812 chromosome 7, whole genome shotgun sequence.
SNP_1155881	ENA|MKGO01000007|MKGO01000007.1	97.101	69	2	0	1	69	367728212	367728280	8.92e-25	117	ENA|MKGO01000007|MKGO01000007.1	63	67	67	0	97.1	1	1	TGCAGCAAGCGACTAGCATATATGGTGGCTAACTTATTCGCAAAAGAGAGCGAGAAGAGGAGGCAAGGC	TGCAGCAAGCGACTAGCATATGTGGTGGCTAACTTATACGCAAAAGAGAGCGAGAAGAGGAGGCAAGGC	69	719689837	ENA|MKGO01000007|MKGO01000007.1 Triticum urartu cultivar G1812 chromosome 7, whole genome shotgun sequence.
SNP_1155881	ENA|MKGO01000007|MKGO01000007.1	97.101	69	2	0	1	69	371892777	371892709	8.92e-25	117	ENA|MKGO01000007|MKGO01000007.1	63	67	67	0	97.1	1	-1	TGCAGCAAGCGACTAGCATATATGGTGGCTAACTTATTCGCAAAAGAGAGCGAGAAGAGGAGGCAAGGC	TGCAGCAAGCGACTAGCATATATGGTGGCTAACTTATTCGCAAAATAGAGCGAGAAGAGGAGGCAAAGC	69	719689837	ENA|MKGO01000007|MKGO01000007.1 Triticum urartu cultivar G1812 chromosome 7, whole genome shotgun sequence.
SNP_1155881	ENA|MKGO01000007|MKGO01000007.1	98.485	66	1	0	1	66	373580039	373580104	8.92e-25	117	ENA|MKGO01000007|MKGO01000007.1	63	65	65	0	98.48	1	1	TGCAGCAAGCGACTAGCATATATGGTGGCTAACTTATTCGCAAAAGAGAGCGAGAAGAGGAGGCAA	TGCAGCAAGCGACTAGCAAATATGGTGGCTAACTTATTCGCAAAAGAGAGCGAGAAGAGGAGGCAA	69	719689837	ENA|MKGO01000007|MKGO01000007.1 Triticum urartu cultivar G1812 chromosome 7, whole genome shotgun sequence.
SNP_1155881	ENA|MKGO01000007|MKGO01000007.1	97.101	69	2	0	1	69	382482734	382482666	8.92e-25	117	ENA|MKGO01000007|MKGO01000007.1	63	67	67	0	97.1	1	-1	TGCAGCAAGCGACTAGCATATATGGTGGCTAACTTATTCGCAAAAGAGAGCGAGAAGAGGAGGCAAGGC	TGCAGCAAGCGACTAGCAAATATGGTGGCTAACTTATTCGCAAAAGAGAGCGAGAAGAGGAGGCAAAGC	69	719689837	ENA|MKGO01000007|MKGO01000007.1 Triticum urartu cultivar G1812 chromosome 7, whole genome shotgun sequence.
SNP_1155881	ENA|MKGO01000007|MKGO01000007.1	98.485	66	1	0	1	66	383160190	383160255	8.92e-25	117	ENA|MKGO01000007|MKGO01000007.1	63	65	65	0	98.48	1	1	TGCAGCAAGCGACTAGCATATATGGTGGCTAACTTATTCGCAAAAGAGAGCGAGAAGAGGAGGCAA	TGCAGCAAGTGACTAGCATATATGGTGGCTAACTTATTCGCAAAAGAGAGCGAGAAGAGGAGGCAA	69	719689837	ENA|MKGO01000007|MKGO01000007.1 Triticum urartu cultivar G1812 chromosome 7, whole genome shotgun sequence.
SNP_1155881	ENA|MKGO01000007|MKGO01000007.1	97.101	69	2	0	1	69	384147114	384147046	8.92e-25	117	ENA|MKGO01000007|MKGO01000007.1	63	67	67	0	97.1	1	-1	TGCAGCAAGCGACTAGCATATATGGTGGCTAACTTATTCGCAAAAGAGAGCGAGAAGAGGAGGCAAGGC	TGCAGCAAGCGACTAGCCTATATGGTGGCTAACTTATTCGCAAAAGAGAGCGAGAAGAGGAGGCAAAGC	69	719689837	ENA|MKGO01000007|MKGO01000007.1 Triticum urartu cultivar G1812 chromosome 7, whole genome shotgun sequence.
SNP_1155881	ENA|MKGO01000007|MKGO01000007.1	97.101	69	2	0	1	69	384156784	384156716	8.92e-25	117	ENA|MKGO01000007|MKGO01000007.1	63	67	67	0	97.1	1	-1	TGCAGCAAGCGACTAGCATATATGGTGGCTAACTTATTCGCAAAAGAGAGCGAGAAGAGGAGGCAAGGC	TGCAGCAAGCGACTAGCCTATATGGTGGCTAACTTATTCGCAAAAGAGAGCGAGAAGAGGAGGCAAAGC	69	719689837	ENA|MKGO01000007|MKGO01000007.1 Triticum urartu cultivar G1812 chromosome 7, whole genome shotgun sequence.
SNP_1155881	ENA|MKGO01000007|MKGO01000007.1	98.485	66	1	0	1	66	384869130	384869195	8.92e-25	117	ENA|MKGO01000007|MKGO01000007.1	63	65	65	0	98.48	1	1	TGCAGCAAGCGACTAGCATATATGGTGGCTAACTTATTCGCAAAAGAGAGCGAGAAGAGGAGGCAA	TGCAGCAAGCGACTAGCATATATGGTGGCTACCTTATTCGCAAAAGAGAGCGAGAAGAGGAGGCAA	69	719689837	ENA|MKGO01000007|MKGO01000007.1 Triticum urartu cultivar G1812 chromosome 7, whole genome shotgun sequence.
SNP_1155881	ENA|MKGO01000007|MKGO01000007.1	97.101	69	2	0	1	69	388009117	388009049	8.92e-25	117	ENA|MKGO01000007|MKGO01000007.1	63	67	67	0	97.1	1	-1	TGCAGCAAGCGACTAGCATATATGGTGGCTAACTTATTCGCAAAAGAGAGCGAGAAGAGGAGGCAAGGC	TGCAGCAAGCGACTAGCAAATATGGTGGCTAACTTATTCGCAAAAGAGAGCGAGAAGAGGAGGCAAAGC	69	719689837	ENA|MKGO01000007|MKGO01000007.1 Triticum urartu cultivar G1812 chromosome 7, whole genome shotgun sequence.
SNP_1155881	ENA|MKGO01000007|MKGO01000007.1	97.101	69	2	0	1	69	388626745	388626677	8.92e-25	117	ENA|MKGO01000007|MKGO01000007.1	63	67	67	0	97.1	1	-1	TGCAGCAAGCGACTAGCATATATGGTGGCTAACTTATTCGCAAAAGAGAGCGAGAAGAGGAGGCAAGGC	TGCAGCAAGCGACTAGCAAATATGGTGGCTAACTTATTCGCAAAAGAGAGCGAGAAGAGGAGGCAAAGC	69	719689837	ENA|MKGO01000007|MKGO01000007.1 Triticum urartu cultivar G1812 chromosome 7, whole genome shotgun sequence.
SNP_1155881	ENA|MKGO01000007|MKGO01000007.1	98.485	66	1	0	1	66	395916616	395916681	8.92e-25	117	ENA|MKGO01000007|MKGO01000007.1	63	65	65	0	98.48	1	1	TGCAGCAAGCGACTAGCATATATGGTGGCTAACTTATTCGCAAAAGAGAGCGAGAAGAGGAGGCAA	TGCAGCAAGCGACTAGCATATATGGTGGCTAACCTATTCGCAAAAGAGAGCGAGAAGAGGAGGCAA	69	719689837	ENA|MKGO01000007|MKGO01000007.1 Triticum urartu cultivar G1812 chromosome 7, whole genome shotgun sequence.
SNP_1155881	ENA|MKGO01000007|MKGO01000007.1	97.101	69	2	0	1	69	397428221	397428289	8.92e-25	117	ENA|MKGO01000007|MKGO01000007.1	63	67	67	0	97.1	1	1	TGCAGCAAGCGACTAGCATATATGGTGGCTAACTTATTCGCAAAAGAGAGCGAGAAGAGGAGGCAAGGC	TGCAGCAAGCGACTAGCATATATGGTGGCTAACCTGTTCGCAAAAGAGAGCGAGAAGAGGAGGCAAGGC	69	719689837	ENA|MKGO01000007|MKGO01000007.1 Triticum urartu cultivar G1812 chromosome 7, whole genome shotgun sequence.
SNP_1155881	ENA|MKGO01000007|MKGO01000007.1	97.101	69	2	0	1	69	399262749	399262681	8.92e-25	117	ENA|MKGO01000007|MKGO01000007.1	63	67	67	0	97.1	1	-1	TGCAGCAAGCGACTAGCATATATGGTGGCTAACTTATTCGCAAAAGAGAGCGAGAAGAGGAGGCAAGGC	TGCAGCAACCGACTAGCATATATGGTGGCTAACTTATTCGCAAAAGAGAGCGAGAAGAGGAGGCAAAGC	69	719689837	ENA|MKGO01000007|MKGO01000007.1 Triticum urartu cultivar G1812 chromosome 7, whole genome shotgun sequence.
SNP_1155881	ENA|MKGO01000007|MKGO01000007.1	97.101	69	2	0	1	69	400600314	400600246	8.92e-25	117	ENA|MKGO01000007|MKGO01000007.1	63	67	67	0	97.1	1	-1	TGCAGCAAGCGACTAGCATATATGGTGGCTAACTTATTCGCAAAAGAGAGCGAGAAGAGGAGGCAAGGC	TGCAGCAAGCGACTAGCATATATGGTGGCTAACTTATTCGCAAAAGAGAGTGAGAAGAGGAGGCAAAGC	69	719689837	ENA|MKGO01000007|MKGO01000007.1 Triticum urartu cultivar G1812 chromosome 7, whole genome shotgun sequence.
SNP_1155881	ENA|MKGO01000007|MKGO01000007.1	97.101	69	2	0	1	69	400748440	400748372	8.92e-25	117	ENA|MKGO01000007|MKGO01000007.1	63	67	67	0	97.1	1	-1	TGCAGCAAGCGACTAGCATATATGGTGGCTAACTTATTCGCAAAAGAGAGCGAGAAGAGGAGGCAAGGC	TGCAGCAAGCGACTAGCATATATGGTGGCTAACCTATTCGCAAAAGAGAGCGAGAAGAGGAGGCAAAGC	69	719689837	ENA|MKGO01000007|MKGO01000007.1 Triticum urartu cultivar G1812 chromosome 7, whole genome shotgun sequence.
SNP_1155881	ENA|MKGO01000007|MKGO01000007.1	97.101	69	2	0	1	69	401236591	401236523	8.92e-25	117	ENA|MKGO01000007|MKGO01000007.1	63	67	67	0	97.1	1	-1	TGCAGCAAGCGACTAGCATATATGGTGGCTAACTTATTCGCAAAAGAGAGCGAGAAGAGGAGGCAAGGC	TGCAGCAAGCGACTAGCATATATGGTGGCTAACCTATTCGCAAAAGAGAGCGAGAAGAGGAGGCAAAGC	69	719689837	ENA|MKGO01000007|MKGO01000007.1 Triticum urartu cultivar G1812 chromosome 7, whole genome shotgun sequence.
SNP_1155881	ENA|MKGO01000007|MKGO01000007.1	97.101	69	2	0	1	69	401438705	401438637	8.92e-25	117	ENA|MKGO01000007|MKGO01000007.1	63	67	67	0	97.1	1	-1	TGCAGCAAGCGACTAGCATATATGGTGGCTAACTTATTCGCAAAAGAGAGCGAGAAGAGGAGGCAAGGC	TGCAGCAAGCGACTAGCAAATATGGTGGCTAACTTATTCGCAAAAGAGAGCGAGAAGAGGAGGCAAAGC	69	719689837	ENA|MKGO01000007|MKGO01000007.1 Triticum urartu cultivar G1812 chromosome 7, whole genome shotgun sequence.
SNP_1155881	ENA|MKGO01000007|MKGO01000007.1	97.101	69	2	0	1	69	401448313	401448245	8.92e-25	117	ENA|MKGO01000007|MKGO01000007.1	63	67	67	0	97.1	1	-1	TGCAGCAAGCGACTAGCATATATGGTGGCTAACTTATTCGCAAAAGAGAGCGAGAAGAGGAGGCAAGGC	TGCAGCAAGCGACTAGCAAATATGGTGGCTAACTTATTCGCAAAAGAGAGCGAGAAGAGGAGGCAAAGC	69	719689837	ENA|MKGO01000007|MKGO01000007.1 Triticum urartu cultivar G1812 chromosome 7, whole genome shotgun sequence.
SNP_1155881	ENA|MKGO01000007|MKGO01000007.1	97.101	69	2	0	1	69	408697967	408697899	8.92e-25	117	ENA|MKGO01000007|MKGO01000007.1	63	67	67	0	97.1	1	-1	TGCAGCAAGCGACTAGCATATATGGTGGCTAACTTATTCGCAAAAGAGAGCGAGAAGAGGAGGCAAGGC	TGCAGCAAGCGACTAGCATATATGGTGGCTAACTTATTCGCAAAGGAGAGCGAGAAGAGGAGGCAAAGC	69	719689837	ENA|MKGO01000007|MKGO01000007.1 Triticum urartu cultivar G1812 chromosome 7, whole genome shotgun sequence.
SNP_1155881	ENA|MKGO01000007|MKGO01000007.1	97.101	69	2	0	1	69	425272579	425272647	8.92e-25	117	ENA|MKGO01000007|MKGO01000007.1	63	67	67	0	97.1	1	1	TGCAGCAAGCGACTAGCATATATGGTGGCTAACTTATTCGCAAAAGAGAGCGAGAAGAGGAGGCAAGGC	TGCAGCAAGCGACTAGCATATGTGGTGGCTAACTTATACGCAAAAGAGAGCGAGAAGAGGAGGCAAGGC	69	719689837	ENA|MKGO01000007|MKGO01000007.1 Triticum urartu cultivar G1812 chromosome 7, whole genome shotgun sequence.
SNP_1155881	ENA|MKGO01000007|MKGO01000007.1	98.485	66	1	0	1	66	433958404	433958469	8.92e-25	117	ENA|MKGO01000007|MKGO01000007.1	63	65	65	0	98.48	1	1	TGCAGCAAGCGACTAGCATATATGGTGGCTAACTTATTCGCAAAAGAGAGCGAGAAGAGGAGGCAA	TGCAGCAAGCGACTAGCATATATGGTGGCTAACCTATTCGCAAAAGAGAGCGAGAAGAGGAGGCAA	69	719689837	ENA|MKGO01000007|MKGO01000007.1 Triticum urartu cultivar G1812 chromosome 7, whole genome shotgun sequence.
SNP_1155881	ENA|MKGO01000007|MKGO01000007.1	97.101	69	2	0	1	69	436464127	436464059	8.92e-25	117	ENA|MKGO01000007|MKGO01000007.1	63	67	67	0	97.1	1	-1	TGCAGCAAGCGACTAGCATATATGGTGGCTAACTTATTCGCAAAAGAGAGCGAGAAGAGGAGGCAAGGC	TGCAGCAAGCGACTAGCATATGTGGTGGCTAACTTATACGCAAAAGAGAGCGAGAAGAGGAGGCAAGGC	69	719689837	ENA|MKGO01000007|MKGO01000007.1 Triticum urartu cultivar G1812 chromosome 7, whole genome shotgun sequence.
SNP_1155881	ENA|MKGO01000007|MKGO01000007.1	98.485	66	1	0	1	66	441293408	441293473	8.92e-25	117	ENA|MKGO01000007|MKGO01000007.1	63	65	65	0	98.48	1	1	TGCAGCAAGCGACTAGCATATATGGTGGCTAACTTATTCGCAAAAGAGAGCGAGAAGAGGAGGCAA	TGCAGCAAGCGACTAGCAAATATGGTGGCTAACTTATTCGCAAAAGAGAGCGAGAAGAGGAGGCAA	69	719689837	ENA|MKGO01000007|MKGO01000007.1 Triticum urartu cultivar G1812 chromosome 7, whole genome shotgun sequence.
SNP_1155881	ENA|MKGO01000007|MKGO01000007.1	98.485	66	1	0	1	66	443509406	443509471	8.92e-25	117	ENA|MKGO01000007|MKGO01000007.1	63	65	65	0	98.48	1	1	TGCAGCAAGCGACTAGCATATATGGTGGCTAACTTATTCGCAAAAGAGAGCGAGAAGAGGAGGCAA	TGCAGCAAGCGACTAGCAAATATGGTGGCTAACTTATTCGCAAAAGAGAGCGAGAAGAGGAGGCAA	69	719689837	ENA|MKGO01000007|MKGO01000007.1 Triticum urartu cultivar G1812 chromosome 7, whole genome shotgun sequence.
SNP_1155881	ENA|MKGO01000007|MKGO01000007.1	98.485	66	1	0	1	66	447980678	447980743	8.92e-25	117	ENA|MKGO01000007|MKGO01000007.1	63	65	65	0	98.48	1	1	TGCAGCAAGCGACTAGCATATATGGTGGCTAACTTATTCGCAAAAGAGAGCGAGAAGAGGAGGCAA	TGCAGCAAGCGACTAGCATATGTGGTGGCTAACTTATTCGCAAAAGAGAGCGAGAAGAGGAGGCAA	69	719689837	ENA|MKGO01000007|MKGO01000007.1 Triticum urartu cultivar G1812 chromosome 7, whole genome shotgun sequence.
SNP_1155881	ENA|MKGO01000007|MKGO01000007.1	98.485	66	1	0	1	66	447990522	447990587	8.92e-25	117	ENA|MKGO01000007|MKGO01000007.1	63	65	65	0	98.48	1	1	TGCAGCAAGCGACTAGCATATATGGTGGCTAACTTATTCGCAAAAGAGAGCGAGAAGAGGAGGCAA	TGCAGCAAGCGACTAGCATATGTGGTGGCTAACTTATTCGCAAAAGAGAGCGAGAAGAGGAGGCAA	69	719689837	ENA|MKGO01000007|MKGO01000007.1 Triticum urartu cultivar G1812 chromosome 7, whole genome shotgun sequence.
SNP_1155881	ENA|MKGO01000007|MKGO01000007.1	97.101	69	2	0	1	69	451103702	451103634	8.92e-25	117	ENA|MKGO01000007|MKGO01000007.1	63	67	67	0	97.1	1	-1	TGCAGCAAGCGACTAGCATATATGGTGGCTAACTTATTCGCAAAAGAGAGCGAGAAGAGGAGGCAAGGC	TGCAGCAAGCGACTAGCATATGTGGTGGCTAACTTATACGCAAAAGAGAGCGAGAAGAGGAGGCAAGGC	69	719689837	ENA|MKGO01000007|MKGO01000007.1 Triticum urartu cultivar G1812 chromosome 7, whole genome shotgun sequence.
SNP_1155881	ENA|MKGO01000007|MKGO01000007.1	97.101	69	2	0	1	69	451113592	451113524	8.92e-25	117	ENA|MKGO01000007|MKGO01000007.1	63	67	67	0	97.1	1	-1	TGCAGCAAGCGACTAGCATATATGGTGGCTAACTTATTCGCAAAAGAGAGCGAGAAGAGGAGGCAAGGC	TGCAGCAAGCGACTAGCATATGTGGTGGCTAACTTATACGCAAAAGAGAGCGAGAAGAGGAGGCAAGGC	69	719689837	ENA|MKGO01000007|MKGO01000007.1 Triticum urartu cultivar G1812 chromosome 7, whole genome shotgun sequence.
SNP_1155881	ENA|MKGO01000007|MKGO01000007.1	97.101	69	2	0	1	69	456088957	456088889	8.92e-25	117	ENA|MKGO01000007|MKGO01000007.1	63	67	67	0	97.1	1	-1	TGCAGCAAGCGACTAGCATATATGGTGGCTAACTTATTCGCAAAAGAGAGCGAGAAGAGGAGGCAAGGC	TGCAGCCAGCGACTAGCATATATGGTGGCTATCTTATTCGCAAAAGAGAGCGAGAAGAGGAGGCAAGGC	69	719689837	ENA|MKGO01000007|MKGO01000007.1 Triticum urartu cultivar G1812 chromosome 7, whole genome shotgun sequence.
SNP_1155881	ENA|MKGO01000007|MKGO01000007.1	97.101	69	2	0	1	69	456112909	456112841	8.92e-25	117	ENA|MKGO01000007|MKGO01000007.1	63	67	67	0	97.1	1	-1	TGCAGCAAGCGACTAGCATATATGGTGGCTAACTTATTCGCAAAAGAGAGCGAGAAGAGGAGGCAAGGC	TGCAGCCAGCGACTAGCATATATGGTGGCTATCTTATTCGCAAAAGAGAGCGAGAAGAGGAGGCAAGGC	69	719689837	ENA|MKGO01000007|MKGO01000007.1 Triticum urartu cultivar G1812 chromosome 7, whole genome shotgun sequence.
SNP_1155881	ENA|MKGO01000007|MKGO01000007.1	97.101	69	2	0	1	69	458191505	458191437	8.92e-25	117	ENA|MKGO01000007|MKGO01000007.1	63	67	67	0	97.1	1	-1	TGCAGCAAGCGACTAGCATATATGGTGGCTAACTTATTCGCAAAAGAGAGCGAGAAGAGGAGGCAAGGC	TGCAGCAAGCGACTAGCATATATGGTGGCTATCTTATTCGCAAAAGAGAGCGAGAAGAGGAGGCAAAGC	69	719689837	ENA|MKGO01000007|MKGO01000007.1 Triticum urartu cultivar G1812 chromosome 7, whole genome shotgun sequence.
SNP_1155881	ENA|MKGO01000007|MKGO01000007.1	97.101	69	2	0	1	69	462199013	462198945	8.92e-25	117	ENA|MKGO01000007|MKGO01000007.1	63	67	67	0	97.1	1	-1	TGCAGCAAGCGACTAGCATATATGGTGGCTAACTTATTCGCAAAAGAGAGCGAGAAGAGGAGGCAAGGC	TGCAGCAAGCGACTAGCAAATATGGTGGCTAACTTATTCGCAAAAGAGAGCGAGAAGAGGAGGCAAAGC	69	719689837	ENA|MKGO01000007|MKGO01000007.1 Triticum urartu cultivar G1812 chromosome 7, whole genome shotgun sequence.
SNP_1155881	ENA|MKGO01000007|MKGO01000007.1	97.101	69	2	0	1	69	469075962	469075894	8.92e-25	117	ENA|MKGO01000007|MKGO01000007.1	63	67	67	0	97.1	1	-1	TGCAGCAAGCGACTAGCATATATGGTGGCTAACTTATTCGCAAAAGAGAGCGAGAAGAGGAGGCAAGGC	TGCAGCAAGCGACTAGCATATGTGGTGGCTAACTTATCCGCAAAAGAGAGCGAGAAGAGGAGGCAAGGC	69	719689837	ENA|MKGO01000007|MKGO01000007.1 Triticum urartu cultivar G1812 chromosome 7, whole genome shotgun sequence.
SNP_1155881	ENA|MKGO01000007|MKGO01000007.1	97.101	69	2	0	1	69	469463959	469464027	8.92e-25	117	ENA|MKGO01000007|MKGO01000007.1	63	67	67	0	97.1	1	1	TGCAGCAAGCGACTAGCATATATGGTGGCTAACTTATTCGCAAAAGAGAGCGAGAAGAGGAGGCAAGGC	TGCAGCAAGCGACTAGCATATGTGGTGGCTAACTTATCCGCAAAAGAGAGCGAGAAGAGGAGGCAAGGC	69	719689837	ENA|MKGO01000007|MKGO01000007.1 Triticum urartu cultivar G1812 chromosome 7, whole genome shotgun sequence.
SNP_1155881	ENA|MKGO01000007|MKGO01000007.1	97.101	69	2	0	1	69	475162537	475162605	8.92e-25	117	ENA|MKGO01000007|MKGO01000007.1	63	67	67	0	97.1	1	1	TGCAGCAAGCGACTAGCATATATGGTGGCTAACTTATTCGCAAAAGAGAGCGAGAAGAGGAGGCAAGGC	TGCAGCAAGCGACTAGCATATGTGGTGGCTAACTTATCCGCAAAAGAGAGCGAGAAGAGGAGGCAAGGC	69	719689837	ENA|MKGO01000007|MKGO01000007.1 Triticum urartu cultivar G1812 chromosome 7, whole genome shotgun sequence.
SNP_1155881	ENA|MKGO01000007|MKGO01000007.1	98.485	66	1	0	1	66	488384567	488384632	8.92e-25	117	ENA|MKGO01000007|MKGO01000007.1	63	65	65	0	98.48	1	1	TGCAGCAAGCGACTAGCATATATGGTGGCTAACTTATTCGCAAAAGAGAGCGAGAAGAGGAGGCAA	TGCAGCAAGCGACTAGCATATATGGTGGCTAACTTATTCGCAAAGGAGAGCGAGAAGAGGAGGCAA	69	719689837	ENA|MKGO01000007|MKGO01000007.1 Triticum urartu cultivar G1812 chromosome 7, whole genome shotgun sequence.
SNP_1155881	ENA|MKGO01000007|MKGO01000007.1	98.485	66	1	0	1	66	488501978	488502043	8.92e-25	117	ENA|MKGO01000007|MKGO01000007.1	63	65	65	0	98.48	1	1	TGCAGCAAGCGACTAGCATATATGGTGGCTAACTTATTCGCAAAAGAGAGCGAGAAGAGGAGGCAA	TGCAGCAAGCGACTAGCATATATGGTGGCTAACTTATTCGCAAAGGAGAGCGAGAAGAGGAGGCAA	69	719689837	ENA|MKGO01000007|MKGO01000007.1 Triticum urartu cultivar G1812 chromosome 7, whole genome shotgun sequence.
SNP_1155881	ENA|MKGO01000007|MKGO01000007.1	97.101	69	2	0	1	69	490115766	490115698	8.92e-25	117	ENA|MKGO01000007|MKGO01000007.1	63	67	67	0	97.1	1	-1	TGCAGCAAGCGACTAGCATATATGGTGGCTAACTTATTCGCAAAAGAGAGCGAGAAGAGGAGGCAAGGC	TGCAGCAAGCGACTAGCAAATATGGTGGCTAACTTATTCGCAAAAGAGAGCGAGAAGAGGAGGCAAAGC	69	719689837	ENA|MKGO01000007|MKGO01000007.1 Triticum urartu cultivar G1812 chromosome 7, whole genome shotgun sequence.
SNP_1155881	ENA|MKGO01000007|MKGO01000007.1	98.485	66	1	0	1	66	495287513	495287578	8.92e-25	117	ENA|MKGO01000007|MKGO01000007.1	63	65	65	0	98.48	1	1	TGCAGCAAGCGACTAGCATATATGGTGGCTAACTTATTCGCAAAAGAGAGCGAGAAGAGGAGGCAA	TGCAGCAAGCGACTAGCATATATGGTGGCTAACTTATTCGCAAAGGAGAGCGAGAAGAGGAGGCAA	69	719689837	ENA|MKGO01000007|MKGO01000007.1 Triticum urartu cultivar G1812 chromosome 7, whole genome shotgun sequence.
SNP_1155881	ENA|MKGO01000007|MKGO01000007.1	98.485	66	1	0	1	66	495297344	495297409	8.92e-25	117	ENA|MKGO01000007|MKGO01000007.1	63	65	65	0	98.48	1	1	TGCAGCAAGCGACTAGCATATATGGTGGCTAACTTATTCGCAAAAGAGAGCGAGAAGAGGAGGCAA	TGCAGCAAGCGACTAGCATATATGGTGGCTAACTTATTCGCAAAGGAGAGCGAGAAGAGGAGGCAA	69	719689837	ENA|MKGO01000007|MKGO01000007.1 Triticum urartu cultivar G1812 chromosome 7, whole genome shotgun sequence.
SNP_1155881	ENA|MKGO01000007|MKGO01000007.1	97.101	69	2	0	1	69	496280620	496280552	8.92e-25	117	ENA|MKGO01000007|MKGO01000007.1	63	67	67	0	97.1	1	-1	TGCAGCAAGCGACTAGCATATATGGTGGCTAACTTATTCGCAAAAGAGAGCGAGAAGAGGAGGCAAGGC	TGCAGCAAGCGACTAGCATATATGGTGGCTAACTTATACGCAAAAGAGAGCGAGAAGAGGAGGCAAAGC	69	719689837	ENA|MKGO01000007|MKGO01000007.1 Triticum urartu cultivar G1812 chromosome 7, whole genome shotgun sequence.
SNP_1155881	ENA|MKGO01000007|MKGO01000007.1	98.485	66	1	0	1	66	497507775	497507840	8.92e-25	117	ENA|MKGO01000007|MKGO01000007.1	63	65	65	0	98.48	1	1	TGCAGCAAGCGACTAGCATATATGGTGGCTAACTTATTCGCAAAAGAGAGCGAGAAGAGGAGGCAA	TGCAGCAAGCGACTAGCAAATATGGTGGCTAACTTATTCGCAAAAGAGAGCGAGAAGAGGAGGCAA	69	719689837	ENA|MKGO01000007|MKGO01000007.1 Triticum urartu cultivar G1812 chromosome 7, whole genome shotgun sequence.
SNP_1155881	ENA|MKGO01000007|MKGO01000007.1	97.101	69	2	0	1	69	509251395	509251327	8.92e-25	117	ENA|MKGO01000007|MKGO01000007.1	63	67	67	0	97.1	1	-1	TGCAGCAAGCGACTAGCATATATGGTGGCTAACTTATTCGCAAAAGAGAGCGAGAAGAGGAGGCAAGGC	TGCAGCAAGCGTCTAGCATATATGGTGGCTAACTTATTCGCAAAAGAGAGCGAGAAGAGGAGGCAAAGC	69	719689837	ENA|MKGO01000007|MKGO01000007.1 Triticum urartu cultivar G1812 chromosome 7, whole genome shotgun sequence.
SNP_1155881	ENA|MKGO01000007|MKGO01000007.1	97.101	69	2	0	1	69	509562910	509562842	8.92e-25	117	ENA|MKGO01000007|MKGO01000007.1	63	67	67	0	97.1	1	-1	TGCAGCAAGCGACTAGCATATATGGTGGCTAACTTATTCGCAAAAGAGAGCGAGAAGAGGAGGCAAGGC	TGCAGCAAGCGACTAGCATATATGGTGGCTAACTTATTCGCAAAGGAGAGCGAGAAGAGGAGGCAAAGC	69	719689837	ENA|MKGO01000007|MKGO01000007.1 Triticum urartu cultivar G1812 chromosome 7, whole genome shotgun sequence.
SNP_1155881	ENA|MKGO01000007|MKGO01000007.1	98.507	67	0	1	1	66	509580918	509580984	8.92e-25	117	ENA|MKGO01000007|MKGO01000007.1	63	66	66	1	98.51	1	1	TGCAGCAAGCGACTAGCATATATGGTGGCTAACTTAT-TCGCAAAAGAGAGCGAGAAGAGGAGGCAA	TGCAGCAAGCGACTAGCATATATGGTGGCTAACTTATATCGCAAAAGAGAGCGAGAAGAGGAGGCAA	69	719689837	ENA|MKGO01000007|MKGO01000007.1 Triticum urartu cultivar G1812 chromosome 7, whole genome shotgun sequence.
SNP_1155881	ENA|MKGO01000007|MKGO01000007.1	97.101	69	2	0	1	69	510629262	510629194	8.92e-25	117	ENA|MKGO01000007|MKGO01000007.1	63	67	67	0	97.1	1	-1	TGCAGCAAGCGACTAGCATATATGGTGGCTAACTTATTCGCAAAAGAGAGCGAGAAGAGGAGGCAAGGC	TGCAGCAAGCGACTAGCATATATGGTGGCTAACTTATTCGCAAAGGAGAGCGAGAAGAGGAGGCAAAGC	69	719689837	ENA|MKGO01000007|MKGO01000007.1 Triticum urartu cultivar G1812 chromosome 7, whole genome shotgun sequence.
SNP_1155881	ENA|MKGO01000007|MKGO01000007.1	97.101	69	2	0	1	69	512787762	512787694	8.92e-25	117	ENA|MKGO01000007|MKGO01000007.1	63	67	67	0	97.1	1	-1	TGCAGCAAGCGACTAGCATATATGGTGGCTAACTTATTCGCAAAAGAGAGCGAGAAGAGGAGGCAAGGC	TGCAGCAAGCGACTAGCATATATGGTGGCTATCTTATTCGCAAAAGAGAGCGAGAAGAGGAGGCAAAGC	69	719689837	ENA|MKGO01000007|MKGO01000007.1 Triticum urartu cultivar G1812 chromosome 7, whole genome shotgun sequence.
SNP_1155881	ENA|MKGO01000007|MKGO01000007.1	97.101	69	2	0	1	69	519426039	519425971	8.92e-25	117	ENA|MKGO01000007|MKGO01000007.1	63	67	67	0	97.1	1	-1	TGCAGCAAGCGACTAGCATATATGGTGGCTAACTTATTCGCAAAAGAGAGCGAGAAGAGGAGGCAAGGC	TGCAGCAAGCGACTAGCAAATATGGTGGCTAACTTATTCGCAAAAGAGAGCGAGAAGAGGAGGCAAAGC	69	719689837	ENA|MKGO01000007|MKGO01000007.1 Triticum urartu cultivar G1812 chromosome 7, whole genome shotgun sequence.
SNP_1155881	ENA|MKGO01000007|MKGO01000007.1	98.485	66	1	0	1	66	520021099	520021164	8.92e-25	117	ENA|MKGO01000007|MKGO01000007.1	63	65	65	0	98.48	1	1	TGCAGCAAGCGACTAGCATATATGGTGGCTAACTTATTCGCAAAAGAGAGCGAGAAGAGGAGGCAA	TGCAGCAAGCGACTAGCAAATATGGTGGCTAACTTATTCGCAAAAGAGAGCGAGAAGAGGAGGCAA	69	719689837	ENA|MKGO01000007|MKGO01000007.1 Triticum urartu cultivar G1812 chromosome 7, whole genome shotgun sequence.
SNP_1155881	ENA|MKGO01000007|MKGO01000007.1	97.101	69	2	0	1	69	525866320	525866252	8.92e-25	117	ENA|MKGO01000007|MKGO01000007.1	63	67	67	0	97.1	1	-1	TGCAGCAAGCGACTAGCATATATGGTGGCTAACTTATTCGCAAAAGAGAGCGAGAAGAGGAGGCAAGGC	TGCAGCAAGCGACTAGCATATATGGTGGCTAACCTATTCGCAAAAGAGAGCGAGAAGAGGAGGCAAAGC	69	719689837	ENA|MKGO01000007|MKGO01000007.1 Triticum urartu cultivar G1812 chromosome 7, whole genome shotgun sequence.
SNP_1155881	ENA|MKGO01000007|MKGO01000007.1	98.485	66	1	0	1	66	528223472	528223537	8.92e-25	117	ENA|MKGO01000007|MKGO01000007.1	63	65	65	0	98.48	1	1	TGCAGCAAGCGACTAGCATATATGGTGGCTAACTTATTCGCAAAAGAGAGCGAGAAGAGGAGGCAA	TGCAGCAAGCGACTAGCATATATGGTGGCTATCTTATTCGCAAAAGAGAGCGAGAAGAGGAGGCAA	69	719689837	ENA|MKGO01000007|MKGO01000007.1 Triticum urartu cultivar G1812 chromosome 7, whole genome shotgun sequence.
SNP_1155881	ENA|MKGO01000007|MKGO01000007.1	97.101	69	2	0	1	69	534394588	534394656	8.92e-25	117	ENA|MKGO01000007|MKGO01000007.1	63	67	67	0	97.1	1	1	TGCAGCAAGCGACTAGCATATATGGTGGCTAACTTATTCGCAAAAGAGAGCGAGAAGAGGAGGCAAGGC	TGCAGCAAGCGACTAGCATATATGGTGGCTAACTTATTCGCAAGGGAGAGCGAGAAGAGGAGGCAAGGC	69	719689837	ENA|MKGO01000007|MKGO01000007.1 Triticum urartu cultivar G1812 chromosome 7, whole genome shotgun sequence.
SNP_1155881	ENA|MKGO01000007|MKGO01000007.1	97.101	69	2	0	1	69	541700074	541700006	8.92e-25	117	ENA|MKGO01000007|MKGO01000007.1	63	67	67	0	97.1	1	-1	TGCAGCAAGCGACTAGCATATATGGTGGCTAACTTATTCGCAAAAGAGAGCGAGAAGAGGAGGCAAGGC	TGCAGCAAGCGACTAGCATATGTGGTGGCTAACTTATCCGCAAAAGAGAGCGAGAAGAGGAGGCAAGGC	69	719689837	ENA|MKGO01000007|MKGO01000007.1 Triticum urartu cultivar G1812 chromosome 7, whole genome shotgun sequence.
SNP_1155881	ENA|MKGO01000007|MKGO01000007.1	97.101	69	2	0	1	69	541709969	541709901	8.92e-25	117	ENA|MKGO01000007|MKGO01000007.1	63	67	67	0	97.1	1	-1	TGCAGCAAGCGACTAGCATATATGGTGGCTAACTTATTCGCAAAAGAGAGCGAGAAGAGGAGGCAAGGC	TGCAGCAAGCGACTAGCATATGTGGTGGCTAACTTATCCGCAAAAGAGAGCGAGAAGAGGAGGCAAGGC	69	719689837	ENA|MKGO01000007|MKGO01000007.1 Triticum urartu cultivar G1812 chromosome 7, whole genome shotgun sequence.
SNP_1155881	ENA|MKGO01000007|MKGO01000007.1	98.485	66	1	0	1	66	551620312	551620377	8.92e-25	117	ENA|MKGO01000007|MKGO01000007.1	63	65	65	0	98.48	1	1	TGCAGCAAGCGACTAGCATATATGGTGGCTAACTTATTCGCAAAAGAGAGCGAGAAGAGGAGGCAA	TGCAGGAAGCGACTAGCATATATGGTGGCTAACTTATTCGCAAAAGAGAGCGAGAAGAGGAGGCAA	69	719689837	ENA|MKGO01000007|MKGO01000007.1 Triticum urartu cultivar G1812 chromosome 7, whole genome shotgun sequence.
SNP_1155881	ENA|MKGO01000007|MKGO01000007.1	97.101	69	2	0	1	69	564618809	564618741	8.92e-25	117	ENA|MKGO01000007|MKGO01000007.1	63	67	67	0	97.1	1	-1	TGCAGCAAGCGACTAGCATATATGGTGGCTAACTTATTCGCAAAAGAGAGCGAGAAGAGGAGGCAAGGC	TGCAGCAAGCGACTAGCAAATATGGTGGCTAACTTATTCGCAAAAGAGAGCGAGAAGAGGAGGCAAAGC	69	719689837	ENA|MKGO01000007|MKGO01000007.1 Triticum urartu cultivar G1812 chromosome 7, whole genome shotgun sequence.
SNP_1155881	ENA|MKGO01000007|MKGO01000007.1	98.507	67	0	1	1	66	568907718	568907784	8.92e-25	117	ENA|MKGO01000007|MKGO01000007.1	63	66	66	1	98.51	1	1	TGCAGCAAGCGACTAGCATATATGGTGGCT-AACTTATTCGCAAAAGAGAGCGAGAAGAGGAGGCAA	TGCAGCAAGCGACTAGCATATATGGTGGCTAAACTTATTCGCAAAAGAGAGCGAGAAGAGGAGGCAA	69	719689837	ENA|MKGO01000007|MKGO01000007.1 Triticum urartu cultivar G1812 chromosome 7, whole genome shotgun sequence.
SNP_1155881	ENA|MKGO01000007|MKGO01000007.1	98.485	66	1	0	1	66	571579691	571579756	8.92e-25	117	ENA|MKGO01000007|MKGO01000007.1	63	65	65	0	98.48	1	1	TGCAGCAAGCGACTAGCATATATGGTGGCTAACTTATTCGCAAAAGAGAGCGAGAAGAGGAGGCAA	TGCAGGAAGCGACTAGCATATATGGTGGCTAACTTATTCGCAAAAGAGAGCGAGAAGAGGAGGCAA	69	719689837	ENA|MKGO01000007|MKGO01000007.1 Triticum urartu cultivar G1812 chromosome 7, whole genome shotgun sequence.
SNP_1155881	ENA|MKGO01000007|MKGO01000007.1	97.101	69	2	0	1	69	576384549	576384481	8.92e-25	117	ENA|MKGO01000007|MKGO01000007.1	63	67	67	0	97.1	1	-1	TGCAGCAAGCGACTAGCATATATGGTGGCTAACTTATTCGCAAAAGAGAGCGAGAAGAGGAGGCAAGGC	TGCAGCAAGCGACTAGCATATATGGTGGCTATCTTATTCGCAAAAGAGAGCGAGAAGAGGAGGCAAAGC	69	719689837	ENA|MKGO01000007|MKGO01000007.1 Triticum urartu cultivar G1812 chromosome 7, whole genome shotgun sequence.
SNP_1155881	ENA|MKGO01000007|MKGO01000007.1	97.101	69	2	0	1	69	576394206	576394138	8.92e-25	117	ENA|MKGO01000007|MKGO01000007.1	63	67	67	0	97.1	1	-1	TGCAGCAAGCGACTAGCATATATGGTGGCTAACTTATTCGCAAAAGAGAGCGAGAAGAGGAGGCAAGGC	TGCAGCAAGCGACTAGCATATATGGTGGCTATCTTATTCGCAAAAGAGAGCGAGAAGAGGAGGCAAAGC	69	719689837	ENA|MKGO01000007|MKGO01000007.1 Triticum urartu cultivar G1812 chromosome 7, whole genome shotgun sequence.
SNP_1155881	ENA|MKGO01000007|MKGO01000007.1	98.485	66	1	0	1	66	580585780	580585845	8.92e-25	117	ENA|MKGO01000007|MKGO01000007.1	63	65	65	0	98.48	1	1	TGCAGCAAGCGACTAGCATATATGGTGGCTAACTTATTCGCAAAAGAGAGCGAGAAGAGGAGGCAA	TGCAGCAAGCGACTAGCATATATGGTGGCTAACTTATTCGCAAAAGAGAGCGAGAAGAGAAGGCAA	69	719689837	ENA|MKGO01000007|MKGO01000007.1 Triticum urartu cultivar G1812 chromosome 7, whole genome shotgun sequence.
SNP_1155881	ENA|MKGO01000007|MKGO01000007.1	98.485	66	1	0	1	66	580593663	580593728	8.92e-25	117	ENA|MKGO01000007|MKGO01000007.1	63	65	65	0	98.48	1	1	TGCAGCAAGCGACTAGCATATATGGTGGCTAACTTATTCGCAAAAGAGAGCGAGAAGAGGAGGCAA	TGCAGCAAGCGACTAGCATATATGGTGGCTAACTTATTCGCAAAAGAGAGCGAGAAGAGAAGGCAA	69	719689837	ENA|MKGO01000007|MKGO01000007.1 Triticum urartu cultivar G1812 chromosome 7, whole genome shotgun sequence.
SNP_1155881	ENA|MKGO01000007|MKGO01000007.1	97.101	69	2	0	1	69	588293795	588293727	8.92e-25	117	ENA|MKGO01000007|MKGO01000007.1	63	67	67	0	97.1	1	-1	TGCAGCAAGCGACTAGCATATATGGTGGCTAACTTATTCGCAAAAGAGAGCGAGAAGAGGAGGCAAGGC	TGCAGCAAGCGACTAGCAAATATGGTGGCTAACTTATTCGCAAAAGAGAGCGAGAAGAGGAGGCAAAGC	69	719689837	ENA|MKGO01000007|MKGO01000007.1 Triticum urartu cultivar G1812 chromosome 7, whole genome shotgun sequence.
SNP_1155881	ENA|MKGO01000007|MKGO01000007.1	97.101	69	2	0	1	69	588382539	588382471	8.92e-25	117	ENA|MKGO01000007|MKGO01000007.1	63	67	67	0	97.1	1	-1	TGCAGCAAGCGACTAGCATATATGGTGGCTAACTTATTCGCAAAAGAGAGCGAGAAGAGGAGGCAAGGC	TGCAGCAAGCGACTAGCAAATATGGTGGCTAACTTATTCGCAAAAGAGAGCGAGAAGAGGAGGCAAAGC	69	719689837	ENA|MKGO01000007|MKGO01000007.1 Triticum urartu cultivar G1812 chromosome 7, whole genome shotgun sequence.
SNP_1155881	ENA|MKGO01000007|MKGO01000007.1	98.485	66	1	0	1	66	589591732	589591797	8.92e-25	117	ENA|MKGO01000007|MKGO01000007.1	63	65	65	0	98.48	1	1	TGCAGCAAGCGACTAGCATATATGGTGGCTAACTTATTCGCAAAAGAGAGCGAGAAGAGGAGGCAA	TGCAGCAAGCGACTAGCATATATGGTGGCTAACATATTCGCAAAAGAGAGCGAGAAGAGGAGGCAA	69	719689837	ENA|MKGO01000007|MKGO01000007.1 Triticum urartu cultivar G1812 chromosome 7, whole genome shotgun sequence.
SNP_1155881	ENA|MKGO01000007|MKGO01000007.1	98.485	66	1	0	1	66	589605651	589605586	8.92e-25	117	ENA|MKGO01000007|MKGO01000007.1	63	65	65	0	98.48	1	-1	TGCAGCAAGCGACTAGCATATATGGTGGCTAACTTATTCGCAAAAGAGAGCGAGAAGAGGAGGCAA	TGCAGCAAGCGACTAGCATATATGGTGGCTAACATATTCGCAAAAGAGAGCGAGAAGAGGAGGCAA	69	719689837	ENA|MKGO01000007|MKGO01000007.1 Triticum urartu cultivar G1812 chromosome 7, whole genome shotgun sequence.
SNP_1155881	ENA|MKGO01000007|MKGO01000007.1	97.101	69	2	0	1	69	590110076	590110144	8.92e-25	117	ENA|MKGO01000007|MKGO01000007.1	63	67	67	0	97.1	1	1	TGCAGCAAGCGACTAGCATATATGGTGGCTAACTTATTCGCAAAAGAGAGCGAGAAGAGGAGGCAAGGC	TGCAGCAAGCGACTAGCATATATGGTGGCTAACCTATTCGCAAAAGAGAGCGAGAAGAGAAGGCAAGGC	69	719689837	ENA|MKGO01000007|MKGO01000007.1 Triticum urartu cultivar G1812 chromosome 7, whole genome shotgun sequence.
SNP_1155881	ENA|MKGO01000007|MKGO01000007.1	97.101	69	2	0	1	69	590147422	590147490	8.92e-25	117	ENA|MKGO01000007|MKGO01000007.1	63	67	67	0	97.1	1	1	TGCAGCAAGCGACTAGCATATATGGTGGCTAACTTATTCGCAAAAGAGAGCGAGAAGAGGAGGCAAGGC	TGCAGCAAGCGACTAGCATATATGGTGGCTAACCTATTCGCAAAAGAGAGCGAGAAGAGAAGGCAAGGC	69	719689837	ENA|MKGO01000007|MKGO01000007.1 Triticum urartu cultivar G1812 chromosome 7, whole genome shotgun sequence.
SNP_1155881	ENA|MKGO01000007|MKGO01000007.1	97.101	69	2	0	1	69	594681062	594680994	8.92e-25	117	ENA|MKGO01000007|MKGO01000007.1	63	67	67	0	97.1	1	-1	TGCAGCAAGCGACTAGCATATATGGTGGCTAACTTATTCGCAAAAGAGAGCGAGAAGAGGAGGCAAGGC	TGCAGCAAGCGACTAGCAAATATGGTGGCTAACTTATTCGCAAAAGAGAGCGAGAAGAGGAGGCAAAGC	69	719689837	ENA|MKGO01000007|MKGO01000007.1 Triticum urartu cultivar G1812 chromosome 7, whole genome shotgun sequence.
SNP_1155881	ENA|MKGO01000007|MKGO01000007.1	98.485	66	1	0	1	66	602787899	602787964	8.92e-25	117	ENA|MKGO01000007|MKGO01000007.1	63	65	65	0	98.48	1	1	TGCAGCAAGCGACTAGCATATATGGTGGCTAACTTATTCGCAAAAGAGAGCGAGAAGAGGAGGCAA	TGCAGCAAGCGACTAGCATATATGGTGGCTAACTTATACGCAAAAGAGAGCGAGAAGAGGAGGCAA	69	719689837	ENA|MKGO01000007|MKGO01000007.1 Triticum urartu cultivar G1812 chromosome 7, whole genome shotgun sequence.
SNP_1155881	ENA|MKGO01000007|MKGO01000007.1	98.485	66	1	0	1	66	602809702	602809767	8.92e-25	117	ENA|MKGO01000007|MKGO01000007.1	63	65	65	0	98.48	1	1	TGCAGCAAGCGACTAGCATATATGGTGGCTAACTTATTCGCAAAAGAGAGCGAGAAGAGGAGGCAA	TGCAGCAAGCGACTAGCATATATGGTGGCTAACTTATACGCAAAAGAGAGCGAGAAGAGGAGGCAA	69	719689837	ENA|MKGO01000007|MKGO01000007.1 Triticum urartu cultivar G1812 chromosome 7, whole genome shotgun sequence.
SNP_1155881	ENA|MKGO01000007|MKGO01000007.1	98.485	66	1	0	1	66	613239915	613239980	8.92e-25	117	ENA|MKGO01000007|MKGO01000007.1	63	65	65	0	98.48	1	1	TGCAGCAAGCGACTAGCATATATGGTGGCTAACTTATTCGCAAAAGAGAGCGAGAAGAGGAGGCAA	TGCAGCAAGCGACTAGCATATATGGTGGCTAACTTATACGCAAAAGAGAGCGAGAAGAGGAGGCAA	69	719689837	ENA|MKGO01000007|MKGO01000007.1 Triticum urartu cultivar G1812 chromosome 7, whole genome shotgun sequence.
SNP_1155881	ENA|MKGO01000007|MKGO01000007.1	97.101	69	2	0	1	69	617289561	617289493	8.92e-25	117	ENA|MKGO01000007|MKGO01000007.1	63	67	67	0	97.1	1	-1	TGCAGCAAGCGACTAGCATATATGGTGGCTAACTTATTCGCAAAAGAGAGCGAGAAGAGGAGGCAAGGC	TGCAGCAAGCGACTAGCATATATGGTGGCTAACTTATTCGCAAAAGAGAGCGAGAATAGGAGGCAAAGC	69	719689837	ENA|MKGO01000007|MKGO01000007.1 Triticum urartu cultivar G1812 chromosome 7, whole genome shotgun sequence.
SNP_1155881	ENA|MKGO01000007|MKGO01000007.1	97.101	69	2	0	1	69	629924599	629924531	8.92e-25	117	ENA|MKGO01000007|MKGO01000007.1	63	67	67	0	97.1	1	-1	TGCAGCAAGCGACTAGCATATATGGTGGCTAACTTATTCGCAAAAGAGAGCGAGAAGAGGAGGCAAGGC	TGCAGCAAGCGACTAGCATATATGGTGGCTAACTTATACGCAAAAGAGAGCGAGAAGAGGAGGCAAAGC	69	719689837	ENA|MKGO01000007|MKGO01000007.1 Triticum urartu cultivar G1812 chromosome 7, whole genome shotgun sequence.
SNP_1155881	ENA|MKGO01000007|MKGO01000007.1	97.101	69	2	0	1	69	647940965	647941033	8.92e-25	117	ENA|MKGO01000007|MKGO01000007.1	63	67	67	0	97.1	1	1	TGCAGCAAGCGACTAGCATATATGGTGGCTAACTTATTCGCAAAAGAGAGCGAGAAGAGGAGGCAAGGC	TGCAGCAAGCGACTAGCATATGTGGTGGCTAACTTATACGCAAAAGAGAGCGAGAAGAGGAGGCAAGGC	69	719689837	ENA|MKGO01000007|MKGO01000007.1 Triticum urartu cultivar G1812 chromosome 7, whole genome shotgun sequence.
SNP_1155881	ENA|MKGO01000007|MKGO01000007.1	97.143	70	1	1	1	69	653899918	653899849	8.92e-25	117	ENA|MKGO01000007|MKGO01000007.1	63	68	68	1	97.14	1	-1	TGCAGCAAGCGACTAGCATATATGGTGGCTAAC-TTATTCGCAAAAGAGAGCGAGAAGAGGAGGCAAGGC	TGCAGCAAGCGACTAGCATATATGGTGGCTAACCTTATTCGCAAAAGAGAGCGAGAAGAGGAGGCAAAGC	69	719689837	ENA|MKGO01000007|MKGO01000007.1 Triticum urartu cultivar G1812 chromosome 7, whole genome shotgun sequence.
SNP_1155881	ENA|MKGO01000007|MKGO01000007.1	97.101	69	2	0	1	69	654615966	654615898	8.92e-25	117	ENA|MKGO01000007|MKGO01000007.1	63	67	67	0	97.1	1	-1	TGCAGCAAGCGACTAGCATATATGGTGGCTAACTTATTCGCAAAAGAGAGCGAGAAGAGGAGGCAAGGC	TGCAGCAAGCGACTAGCATATATGGTGGCTAACTTATTAGCAAAAGAGAGCGAGAAGAGGAGGCAAAGC	69	719689837	ENA|MKGO01000007|MKGO01000007.1 Triticum urartu cultivar G1812 chromosome 7, whole genome shotgun sequence.
SNP_1155881	ENA|MKGO01000007|MKGO01000007.1	97.101	69	2	0	1	69	672533687	672533619	8.92e-25	117	ENA|MKGO01000007|MKGO01000007.1	63	67	67	0	97.1	1	-1	TGCAGCAAGCGACTAGCATATATGGTGGCTAACTTATTCGCAAAAGAGAGCGAGAAGAGGAGGCAAGGC	TGCAGCAAGCGACTAGCATATGTGGTGGCTAACTTATACGCAAAAGAGAGCGAGAAGAGGAGGCAAGGC	69	719689837	ENA|MKGO01000007|MKGO01000007.1 Triticum urartu cultivar G1812 chromosome 7, whole genome shotgun sequence.
SNP_1155881	ENA|MKGO01000007|MKGO01000007.1	97.101	69	2	0	1	69	672556520	672556452	8.92e-25	117	ENA|MKGO01000007|MKGO01000007.1	63	67	67	0	97.1	1	-1	TGCAGCAAGCGACTAGCATATATGGTGGCTAACTTATTCGCAAAAGAGAGCGAGAAGAGGAGGCAAGGC	TGCAGCAAGCGACTAGCATATGTGGTGGCTAACTTATACGCAAAAGAGAGCGAGAAGAGGAGGCAAGGC	69	719689837	ENA|MKGO01000007|MKGO01000007.1 Triticum urartu cultivar G1812 chromosome 7, whole genome shotgun sequence.
SNP_1155881	ENA|MKGO01000007|MKGO01000007.1	98.485	66	1	0	1	66	704491138	704491203	8.92e-25	117	ENA|MKGO01000007|MKGO01000007.1	63	65	65	0	98.48	1	1	TGCAGCAAGCGACTAGCATATATGGTGGCTAACTTATTCGCAAAAGAGAGCGAGAAGAGGAGGCAA	TGCAGCAAGCGACTAGCATATATGGTGGCTAACTTATTCACAAAAGAGAGCGAGAAGAGGAGGCAA	69	719689837	ENA|MKGO01000007|MKGO01000007.1 Triticum urartu cultivar G1812 chromosome 7, whole genome shotgun sequence.
SNP_1155881	ENA|MKGO01000007|MKGO01000007.1	98.485	66	1	0	1	66	704756352	704756417	8.92e-25	117	ENA|MKGO01000007|MKGO01000007.1	63	65	65	0	98.48	1	1	TGCAGCAAGCGACTAGCATATATGGTGGCTAACTTATTCGCAAAAGAGAGCGAGAAGAGGAGGCAA	TGCAGCAAGCGACTAGCATATATGGTGGCTAACTTATTCACAAAAGAGAGCGAGAAGAGGAGGCAA	69	719689837	ENA|MKGO01000007|MKGO01000007.1 Triticum urartu cultivar G1812 chromosome 7, whole genome shotgun sequence.
SNP_1155881	ENA|MKGO01000007|MKGO01000007.1	98.485	66	1	0	1	66	704785102	704785167	8.92e-25	117	ENA|MKGO01000007|MKGO01000007.1	63	65	65	0	98.48	1	1	TGCAGCAAGCGACTAGCATATATGGTGGCTAACTTATTCGCAAAAGAGAGCGAGAAGAGGAGGCAA	TGCAGCAAGCGACTAGCATATATGGTGGCTAACTTATTCACAAAAGAGAGCGAGAAGAGGAGGCAA	69	719689837	ENA|MKGO01000007|MKGO01000007.1 Triticum urartu cultivar G1812 chromosome 7, whole genome shotgun sequence.
SNP_1155881	ENA|MKGO01000007|MKGO01000007.1	98.485	66	1	0	1	66	704794716	704794781	8.92e-25	117	ENA|MKGO01000007|MKGO01000007.1	63	65	65	0	98.48	1	1	TGCAGCAAGCGACTAGCATATATGGTGGCTAACTTATTCGCAAAAGAGAGCGAGAAGAGGAGGCAA	TGCAGCAAGCGACTAGCATATATGGTGGCTAACTTATTCACAAAAGAGAGCGAGAAGAGGAGGCAA	69	719689837	ENA|MKGO01000007|MKGO01000007.1 Triticum urartu cultivar G1812 chromosome 7, whole genome shotgun sequence.
SNP_1155881	ENA|MKGO01000007|MKGO01000007.1	98.485	66	1	0	1	66	708861772	708861837	8.92e-25	117	ENA|MKGO01000007|MKGO01000007.1	63	65	65	0	98.48	1	1	TGCAGCAAGCGACTAGCATATATGGTGGCTAACTTATTCGCAAAAGAGAGCGAGAAGAGGAGGCAA	TGCAGCAAGCGACTAGCATATATGGTGGCTAACCTATTCGCAAAAGAGAGCGAGAAGAGGAGGCAA	69	719689837	ENA|MKGO01000007|MKGO01000007.1 Triticum urartu cultivar G1812 chromosome 7, whole genome shotgun sequence.
SNP_1155881	ENA|MKGO01000007|MKGO01000007.1	98.485	66	0	1	1	66	38961075	38961139	3.21e-24	115	ENA|MKGO01000007|MKGO01000007.1	62	65	65	1	98.48	1	1	TGCAGCAAGCGACTAGCATATATGGTGGCTAACTTATTCGCAAAAGAGAGCGAGAAGAGGAGGCAA	TGCAGCAAGCGACTAGCA-ATATGGTGGCTAACTTATTCGCAAAAGAGAGCGAGAAGAGGAGGCAA	69	719689837	ENA|MKGO01000007|MKGO01000007.1 Triticum urartu cultivar G1812 chromosome 7, whole genome shotgun sequence.
SNP_1155881	ENA|MKGO01000007|MKGO01000007.1	97.101	69	1	1	1	69	63108061	63107994	3.21e-24	115	ENA|MKGO01000007|MKGO01000007.1	62	67	67	1	97.1	1	-1	TGCAGCAAGCGACTAGCATATATGGTGGCTAACTTATTCGCAAAAGAGAGCGAGAAGAGGAGGCAAGGC	TGCAGCAAGCGACTAGCATATATGGTGGCTAACTTATTCGCAAAAGA-AGCGAGAAGAGGAGGCAAAGC	69	719689837	ENA|MKGO01000007|MKGO01000007.1 Triticum urartu cultivar G1812 chromosome 7, whole genome shotgun sequence.
SNP_1155881	ENA|MKGO01000007|MKGO01000007.1	97.101	69	1	1	1	69	63116541	63116474	3.21e-24	115	ENA|MKGO01000007|MKGO01000007.1	62	67	67	1	97.1	1	-1	TGCAGCAAGCGACTAGCATATATGGTGGCTAACTTATTCGCAAAAGAGAGCGAGAAGAGGAGGCAAGGC	TGCAGCAAGCGACTAGCATATATGGTGGCTAACTTATTCGCAAAAGA-AGCGAGAAGAGGAGGCAAAGC	69	719689837	ENA|MKGO01000007|MKGO01000007.1 Triticum urartu cultivar G1812 chromosome 7, whole genome shotgun sequence.
SNP_1155881	ENA|MKGO01000007|MKGO01000007.1	97.059	68	2	0	1	68	244318601	244318534	3.21e-24	115	ENA|MKGO01000007|MKGO01000007.1	62	66	66	0	97.06	1	-1	TGCAGCAAGCGACTAGCATATATGGTGGCTAACTTATTCGCAAAAGAGAGCGAGAAGAGGAGGCAAGG	TGCAGCAAGCGACTAGCATATGTGGTGGCTAACTTATCCGCAAAAGAGAGCGAGAAGAGGAGGCAAGG	69	719689837	ENA|MKGO01000007|MKGO01000007.1 Triticum urartu cultivar G1812 chromosome 7, whole genome shotgun sequence.
SNP_1155881	ENA|MKGO01000007|MKGO01000007.1	97.059	68	2	0	1	68	244326708	244326641	3.21e-24	115	ENA|MKGO01000007|MKGO01000007.1	62	66	66	0	97.06	1	-1	TGCAGCAAGCGACTAGCATATATGGTGGCTAACTTATTCGCAAAAGAGAGCGAGAAGAGGAGGCAAGG	TGCAGCAAGCGACTAGCATATGTGGTGGCTAACTTATCCGCAAAAGAGAGCGAGAAGAGGAGGCAAGG	69	719689837	ENA|MKGO01000007|MKGO01000007.1 Triticum urartu cultivar G1812 chromosome 7, whole genome shotgun sequence.
SNP_1155881	ENA|MKGO01000007|MKGO01000007.1	97.101	69	1	1	1	69	287544873	287544806	3.21e-24	115	ENA|MKGO01000007|MKGO01000007.1	62	67	67	1	97.1	1	-1	TGCAGCAAGCGACTAGCATATATGGTGGCTAACTTATTCGCAAAAGAGAGCGAGAAGAGGAGGCAAGGC	TGCAGCAAGCGACTAGCA-ATATGGTGGCTAACTTATTCGCAAAAGAGAGCGAGAAGAGGAGGCAAAGC	69	719689837	ENA|MKGO01000007|MKGO01000007.1 Triticum urartu cultivar G1812 chromosome 7, whole genome shotgun sequence.
SNP_1155881	ENA|MKGO01000007|MKGO01000007.1	98.462	65	1	0	1	65	395061004	395060940	3.21e-24	115	ENA|MKGO01000007|MKGO01000007.1	62	64	64	0	98.46	1	-1	TGCAGCAAGCGACTAGCATATATGGTGGCTAACTTATTCGCAAAAGAGAGCGAGAAGAGGAGGCA	TGCAGCAAGCGACTAGCAAATATGGTGGCTAACTTATTCGCAAAAGAGAGCGAGAAGAGGAGGCA	69	719689837	ENA|MKGO01000007|MKGO01000007.1 Triticum urartu cultivar G1812 chromosome 7, whole genome shotgun sequence.
SNP_1155881	ENA|MKGO01000007|MKGO01000007.1	97.101	69	1	1	1	69	509241415	509241348	3.21e-24	115	ENA|MKGO01000007|MKGO01000007.1	62	67	67	1	97.1	1	-1	TGCAGCAAGCGACTAGCATATATGGTGGCTAACTTATTCGCAAAAGAGAGCGAGAAGAGGAGGCAAGGC	TGCAGCAAGCGACTAGCA-ATATGGTGGCTAACTTATTCGCAAAAGAGAGCGAGAAGAGGAGGCAAAGC	69	719689837	ENA|MKGO01000007|MKGO01000007.1 Triticum urartu cultivar G1812 chromosome 7, whole genome shotgun sequence.
SNP_1155881	ENA|MKGO01000007|MKGO01000007.1	98.462	65	1	0	2	66	618022231	618022295	3.21e-24	115	ENA|MKGO01000007|MKGO01000007.1	62	64	64	0	98.46	1	1	GCAGCAAGCGACTAGCATATATGGTGGCTAACTTATTCGCAAAAGAGAGCGAGAAGAGGAGGCAA	GCAGCAAGCGACTAGCATATATGGTGGCTAACTTATTCGCAAAAAAGAGCGAGAAGAGGAGGCAA	69	719689837	ENA|MKGO01000007|MKGO01000007.1 Triticum urartu cultivar G1812 chromosome 7, whole genome shotgun sequence.
SNP_1155881	ENA|MKGO01000007|MKGO01000007.1	98.462	65	1	0	2	66	618031879	618031943	3.21e-24	115	ENA|MKGO01000007|MKGO01000007.1	62	64	64	0	98.46	1	1	GCAGCAAGCGACTAGCATATATGGTGGCTAACTTATTCGCAAAAGAGAGCGAGAAGAGGAGGCAA	GCAGCAAGCGACTAGCATATATGGTGGCTAACTTATTCGCAAAAAAGAGCGAGAAGAGGAGGCAA	69	719689837	ENA|MKGO01000007|MKGO01000007.1 Triticum urartu cultivar G1812 chromosome 7, whole genome shotgun sequence.
SNP_1155881	ENA|MKGO01000007|MKGO01000007.1	98.462	65	1	0	2	66	626122218	626122282	3.21e-24	115	ENA|MKGO01000007|MKGO01000007.1	62	64	64	0	98.46	1	1	GCAGCAAGCGACTAGCATATATGGTGGCTAACTTATTCGCAAAAGAGAGCGAGAAGAGGAGGCAA	GCAGCAAGCGACTAGCATATATAGTGGCTAACTTATTCGCAAAAGAGAGCGAGAAGAGGAGGCAA	69	719689837	ENA|MKGO01000007|MKGO01000007.1 Triticum urartu cultivar G1812 chromosome 7, whole genome shotgun sequence.
SNP_1155881	ENA|MKGO01000007|MKGO01000007.1	98.485	66	0	1	1	66	681295831	681295895	3.21e-24	115	ENA|MKGO01000007|MKGO01000007.1	62	65	65	1	98.48	1	1	TGCAGCAAGCGACTAGCATATATGGTGGCTAACTTATTCGCAAAAGAGAGCGAGAAGAGGAGGCAA	TGCAGCAAGCGACTAGCA-ATATGGTGGCTAACTTATTCGCAAAAGAGAGCGAGAAGAGGAGGCAA	69	719689837	ENA|MKGO01000007|MKGO01000007.1 Triticum urartu cultivar G1812 chromosome 7, whole genome shotgun sequence.
SNP_1155881	ENA|MKGO01000007|MKGO01000007.1	97.015	67	2	0	3	69	8851518	8851452	1.15e-23	113	ENA|MKGO01000007|MKGO01000007.1	61	65	65	0	97.01	1	-1	CAGCAAGCGACTAGCATATATGGTGGCTAACTTATTCGCAAAAGAGAGCGAGAAGAGGAGGCAAGGC	CAGCAAGCGACTAGCATATATGGTGGCTAAATTATTCGCAAAAGAGAGCGAGAAGAGGAGGCAAAGC	69	719689837	ENA|MKGO01000007|MKGO01000007.1 Triticum urartu cultivar G1812 chromosome 7, whole genome shotgun sequence.
SNP_1155881	ENA|MKGO01000007|MKGO01000007.1	97.059	68	0	2	1	66	59349958	59350025	1.15e-23	113	ENA|MKGO01000007|MKGO01000007.1	61	66	66	2	97.06	1	1	TGCAGCAAGCGACTAGCATA-TATGGTGGCT-AACTTATTCGCAAAAGAGAGCGAGAAGAGGAGGCAA	TGCAGCAAGCGACTAGCATAGTATGGTGGCTAAACTTATTCGCAAAAGAGAGCGAGAAGAGGAGGCAA	69	719689837	ENA|MKGO01000007|MKGO01000007.1 Triticum urartu cultivar G1812 chromosome 7, whole genome shotgun sequence.
SNP_1155881	ENA|MKGO01000007|MKGO01000007.1	97.015	67	2	0	3	69	59969916	59969850	1.15e-23	113	ENA|MKGO01000007|MKGO01000007.1	61	65	65	0	97.01	1	-1	CAGCAAGCGACTAGCATATATGGTGGCTAACTTATTCGCAAAAGAGAGCGAGAAGAGGAGGCAAGGC	CAGCAAGCGACTAGCATATATGGTGGCTAACTTATTCGCAAAGGAGAGCGAGAAGAGGAGGCAAAGC	69	719689837	ENA|MKGO01000007|MKGO01000007.1 Triticum urartu cultivar G1812 chromosome 7, whole genome shotgun sequence.
SNP_1155881	ENA|MKGO01000007|MKGO01000007.1	97.015	67	2	0	3	69	138234183	138234117	1.15e-23	113	ENA|MKGO01000007|MKGO01000007.1	61	65	65	0	97.01	1	-1	CAGCAAGCGACTAGCATATATGGTGGCTAACTTATTCGCAAAAGAGAGCGAGAAGAGGAGGCAAGGC	CAGCAAGCGACTAGCATATATGGTGGCTAACTTATTTGCAAAAGAGAGCGAGAAGAGGAGGCAAAGC	69	719689837	ENA|MKGO01000007|MKGO01000007.1 Triticum urartu cultivar G1812 chromosome 7, whole genome shotgun sequence.
SNP_1155881	ENA|MKGO01000007|MKGO01000007.1	97.015	67	2	0	1	67	232984977	232984911	1.15e-23	113	ENA|MKGO01000007|MKGO01000007.1	61	65	65	0	97.01	1	-1	TGCAGCAAGCGACTAGCATATATGGTGGCTAACTTATTCGCAAAAGAGAGCGAGAAGAGGAGGCAAG	TGCAGCAAGCGACTAGCATATATGGTGGCTAACTTATTCGCAAGGGAGAGCGAGAAGAGGAGGCAAG	69	719689837	ENA|MKGO01000007|MKGO01000007.1 Triticum urartu cultivar G1812 chromosome 7, whole genome shotgun sequence.
SNP_1155881	ENA|MKGO01000007|MKGO01000007.1	97.015	67	2	0	1	67	233741526	233741592	1.15e-23	113	ENA|MKGO01000007|MKGO01000007.1	61	65	65	0	97.01	1	1	TGCAGCAAGCGACTAGCATATATGGTGGCTAACTTATTCGCAAAAGAGAGCGAGAAGAGGAGGCAAG	TGCAGCAAGCGACTAGCATATGTGGTGGCTAACTTATACGCAAAAGAGAGCGAGAAGAGGAGGCAAG	69	719689837	ENA|MKGO01000007|MKGO01000007.1 Triticum urartu cultivar G1812 chromosome 7, whole genome shotgun sequence.
SNP_1155881	ENA|MKGO01000007|MKGO01000007.1	97.015	67	2	0	1	67	470349274	470349340	1.15e-23	113	ENA|MKGO01000007|MKGO01000007.1	61	65	65	0	97.01	1	1	TGCAGCAAGCGACTAGCATATATGGTGGCTAACTTATTCGCAAAAGAGAGCGAGAAGAGGAGGCAAG	TGCAGCAAGCGACTAGCATATATGGTGGCTAACCTATTCGCAAAAGAGAGCGAGAAGAGAAGGCAAG	69	719689837	ENA|MKGO01000007|MKGO01000007.1 Triticum urartu cultivar G1812 chromosome 7, whole genome shotgun sequence.
SNP_1155881	ENA|MKGO01000007|MKGO01000007.1	98.438	64	1	0	3	66	481975701	481975764	1.15e-23	113	ENA|MKGO01000007|MKGO01000007.1	61	63	63	0	98.44	1	1	CAGCAAGCGACTAGCATATATGGTGGCTAACTTATTCGCAAAAGAGAGCGAGAAGAGGAGGCAA	CAGCAAGCGACTAGCATATATGGTGGCTAACTTATACGCAAAAGAGAGCGAGAAGAGGAGGCAA	69	719689837	ENA|MKGO01000007|MKGO01000007.1 Triticum urartu cultivar G1812 chromosome 7, whole genome shotgun sequence.
SNP_1155881	ENA|MKGO01000007|MKGO01000007.1	97.059	68	1	1	1	67	511367463	511367396	1.15e-23	113	ENA|MKGO01000007|MKGO01000007.1	61	66	66	1	97.06	1	-1	TGCAGCAAGCGACTAGCATATATGGTGGCTAACTTATTCGCAAAAGAGAGCGAGAAGAGGAGGC-AAG	TGCAGCAAGCGACTAGCAAATATGGTGGCTAACTTATTCGCAAAAGAGAGCGAGAAGAGGAGGCGAAG	69	719689837	ENA|MKGO01000007|MKGO01000007.1 Triticum urartu cultivar G1812 chromosome 7, whole genome shotgun sequence.
SNP_1155881	ENA|MKGO01000007|MKGO01000007.1	97.015	67	2	0	1	67	709954300	709954234	1.15e-23	113	ENA|MKGO01000007|MKGO01000007.1	61	65	65	0	97.01	1	-1	TGCAGCAAGCGACTAGCATATATGGTGGCTAACTTATTCGCAAAAGAGAGCGAGAAGAGGAGGCAAG	TGCAGCAAGCGACTAGCATATATGGTGGCTATCTTATACGCAAAAGAGAGCGAGAAGAGGAGGCAAG	69	719689837	ENA|MKGO01000007|MKGO01000007.1 Triticum urartu cultivar G1812 chromosome 7, whole genome shotgun sequence.
SNP_1155881	ENA|MKGO01000007|MKGO01000007.1	95.652	69	3	0	1	69	1359761	1359693	4.15e-23	111	ENA|MKGO01000007|MKGO01000007.1	60	66	66	0	95.65	1	-1	TGCAGCAAGCGACTAGCATATATGGTGGCTAACTTATTCGCAAAAGAGAGCGAGAAGAGGAGGCAAGGC	TGCAGCAAGCGACTAGCAAGTATGGTGGCTAACTTATTCGCAAAAGAGAGCGAGAAGAGGAGGCAAAGC	69	719689837	ENA|MKGO01000007|MKGO01000007.1 Triticum urartu cultivar G1812 chromosome 7, whole genome shotgun sequence.
SNP_1155881	ENA|MKGO01000007|MKGO01000007.1	95.652	69	3	0	1	69	6964875	6964807	4.15e-23	111	ENA|MKGO01000007|MKGO01000007.1	60	66	66	0	95.65	1	-1	TGCAGCAAGCGACTAGCATATATGGTGGCTAACTTATTCGCAAAAGAGAGCGAGAAGAGGAGGCAAGGC	TGCAGCAAGCGAATAGCAAATATGGTGGCTAACTTATTCGCAAAAGAGAGCGAGAAGAGGAGGCAAAGC	69	719689837	ENA|MKGO01000007|MKGO01000007.1 Triticum urartu cultivar G1812 chromosome 7, whole genome shotgun sequence.
SNP_1155881	ENA|MKGO01000007|MKGO01000007.1	96.97	66	2	0	1	66	11665037	11665102	4.15e-23	111	ENA|MKGO01000007|MKGO01000007.1	60	64	64	0	96.97	1	1	TGCAGCAAGCGACTAGCATATATGGTGGCTAACTTATTCGCAAAAGAGAGCGAGAAGAGGAGGCAA	TGCAGCAAGCGACTAGCATATATGTTGGCTAACTTATACGCAAAAGAGAGCGAGAAGAGGAGGCAA	69	719689837	ENA|MKGO01000007|MKGO01000007.1 Triticum urartu cultivar G1812 chromosome 7, whole genome shotgun sequence.
SNP_1155881	ENA|MKGO01000007|MKGO01000007.1	96.97	66	2	0	1	66	16059429	16059494	4.15e-23	111	ENA|MKGO01000007|MKGO01000007.1	60	64	64	0	96.97	1	1	TGCAGCAAGCGACTAGCATATATGGTGGCTAACTTATTCGCAAAAGAGAGCGAGAAGAGGAGGCAA	TGCAGCAAGCGACTAGCATATATGGTGGCTAACCTATTCGCAAAAGAGAGCGAGAAGAGAAGGCAA	69	719689837	ENA|MKGO01000007|MKGO01000007.1 Triticum urartu cultivar G1812 chromosome 7, whole genome shotgun sequence.
SNP_1155881	ENA|MKGO01000007|MKGO01000007.1	96.97	66	2	0	1	66	19754930	19754995	4.15e-23	111	ENA|MKGO01000007|MKGO01000007.1	60	64	64	0	96.97	1	1	TGCAGCAAGCGACTAGCATATATGGTGGCTAACTTATTCGCAAAAGAGAGCGAGAAGAGGAGGCAA	TGCAGCAAGCGACTAGCATATATGGTGGCTAACTTATTCGTAAAAGAGAGCGAGAAGAGAAGGCAA	69	719689837	ENA|MKGO01000007|MKGO01000007.1 Triticum urartu cultivar G1812 chromosome 7, whole genome shotgun sequence.
SNP_1155881	ENA|MKGO01000007|MKGO01000007.1	96.97	66	2	0	1	66	21392491	21392556	4.15e-23	111	ENA|MKGO01000007|MKGO01000007.1	60	64	64	0	96.97	1	1	TGCAGCAAGCGACTAGCATATATGGTGGCTAACTTATTCGCAAAAGAGAGCGAGAAGAGGAGGCAA	TGCAGCAAGCGACTAGCATATATGGTGGCTAACATATTCGCAAAAGAGAGCGAGAAGAGAAGGCAA	69	719689837	ENA|MKGO01000007|MKGO01000007.1 Triticum urartu cultivar G1812 chromosome 7, whole genome shotgun sequence.
SNP_1155881	ENA|MKGO01000007|MKGO01000007.1	96.97	66	2	0	1	66	21538260	21538325	4.15e-23	111	ENA|MKGO01000007|MKGO01000007.1	60	64	64	0	96.97	1	1	TGCAGCAAGCGACTAGCATATATGGTGGCTAACTTATTCGCAAAAGAGAGCGAGAAGAGGAGGCAA	TGCAGCAAGCGACTAGCATATATGGTGGCTAACATATTCGCAAAAGAGAGCGAGAAGAGAAGGCAA	69	719689837	ENA|MKGO01000007|MKGO01000007.1 Triticum urartu cultivar G1812 chromosome 7, whole genome shotgun sequence.
SNP_1155881	ENA|MKGO01000007|MKGO01000007.1	96.97	66	2	0	1	66	22709245	22709310	4.15e-23	111	ENA|MKGO01000007|MKGO01000007.1	60	64	64	0	96.97	1	1	TGCAGCAAGCGACTAGCATATATGGTGGCTAACTTATTCGCAAAAGAGAGCGAGAAGAGGAGGCAA	TGCAGCAAGCGACTAGCATATATGGTGGCTAACTTATTCGCAAAAGAGAGCGAGAAGAGAGGGCAA	69	719689837	ENA|MKGO01000007|MKGO01000007.1 Triticum urartu cultivar G1812 chromosome 7, whole genome shotgun sequence.
SNP_1155881	ENA|MKGO01000007|MKGO01000007.1	96.97	66	2	0	1	66	26021041	26021106	4.15e-23	111	ENA|MKGO01000007|MKGO01000007.1	60	64	64	0	96.97	1	1	TGCAGCAAGCGACTAGCATATATGGTGGCTAACTTATTCGCAAAAGAGAGCGAGAAGAGGAGGCAA	TGCAGCAAGCGACTAGCATATATGGTGGCTAACATATTCGCAAAAGAGAGCGAGAAGAGAAGGCAA	69	719689837	ENA|MKGO01000007|MKGO01000007.1 Triticum urartu cultivar G1812 chromosome 7, whole genome shotgun sequence.
SNP_1155881	ENA|MKGO01000007|MKGO01000007.1	95.652	69	3	0	1	69	26161487	26161419	4.15e-23	111	ENA|MKGO01000007|MKGO01000007.1	60	66	66	0	95.65	1	-1	TGCAGCAAGCGACTAGCATATATGGTGGCTAACTTATTCGCAAAAGAGAGCGAGAAGAGGAGGCAAGGC	TGCAGCAAGCGACTAGCATATATGGTGGCTATCTTATACGCAAAAGAGAGCGAGAAGAGGAGGCAAAGC	69	719689837	ENA|MKGO01000007|MKGO01000007.1 Triticum urartu cultivar G1812 chromosome 7, whole genome shotgun sequence.
SNP_1155881	ENA|MKGO01000007|MKGO01000007.1	96.97	66	2	0	1	66	31936654	31936589	4.15e-23	111	ENA|MKGO01000007|MKGO01000007.1	60	64	64	0	96.97	1	-1	TGCAGCAAGCGACTAGCATATATGGTGGCTAACTTATTCGCAAAAGAGAGCGAGAAGAGGAGGCAA	TGCAGCAAGCGACTAGCATATATGGTGGCTAACCTATTCGCAAAAGAGAGCGAGAAGAGAAGGCAA	69	719689837	ENA|MKGO01000007|MKGO01000007.1 Triticum urartu cultivar G1812 chromosome 7, whole genome shotgun sequence.
SNP_1155881	ENA|MKGO01000007|MKGO01000007.1	96.97	66	2	0	1	66	31955080	31955015	4.15e-23	111	ENA|MKGO01000007|MKGO01000007.1	60	64	64	0	96.97	1	-1	TGCAGCAAGCGACTAGCATATATGGTGGCTAACTTATTCGCAAAAGAGAGCGAGAAGAGGAGGCAA	TGCAGCAAGCGACTAGCATATATGGTGGCTAACCTATTCGCAAAAGAGAGCGAGAAGAGAAGGCAA	69	719689837	ENA|MKGO01000007|MKGO01000007.1 Triticum urartu cultivar G1812 chromosome 7, whole genome shotgun sequence.
SNP_1155881	ENA|MKGO01000007|MKGO01000007.1	95.652	69	3	0	1	69	38795939	38795871	4.15e-23	111	ENA|MKGO01000007|MKGO01000007.1	60	66	66	0	95.65	1	-1	TGCAGCAAGCGACTAGCATATATGGTGGCTAACTTATTCGCAAAAGAGAGCGAGAAGAGGAGGCAAGGC	TGCAGCAAGCGACTAGCATATGTGGTGGCTGACTTATCCGCAAAAGAGAGCGAGAAGAGGAGGCAAGGC	69	719689837	ENA|MKGO01000007|MKGO01000007.1 Triticum urartu cultivar G1812 chromosome 7, whole genome shotgun sequence.
SNP_1155881	ENA|MKGO01000007|MKGO01000007.1	96.97	66	2	0	1	66	40203610	40203545	4.15e-23	111	ENA|MKGO01000007|MKGO01000007.1	60	64	64	0	96.97	1	-1	TGCAGCAAGCGACTAGCATATATGGTGGCTAACTTATTCGCAAAAGAGAGCGAGAAGAGGAGGCAA	TGCAGCAAGCGACTAGCATATATGGTGGCTAACCTATTCGCAAAAGAGAGCGAGAAGAGAAGGCAA	69	719689837	ENA|MKGO01000007|MKGO01000007.1 Triticum urartu cultivar G1812 chromosome 7, whole genome shotgun sequence.
SNP_1155881	ENA|MKGO01000007|MKGO01000007.1	96.97	66	2	0	1	66	42892566	42892631	4.15e-23	111	ENA|MKGO01000007|MKGO01000007.1	60	64	64	0	96.97	1	1	TGCAGCAAGCGACTAGCATATATGGTGGCTAACTTATTCGCAAAAGAGAGCGAGAAGAGGAGGCAA	TGCAGCAAGCAACTAGCAAATATGGTGGCTAACTTATTCGCAAAAGAGAGCGAGAAGAGGAGGCAA	69	719689837	ENA|MKGO01000007|MKGO01000007.1 Triticum urartu cultivar G1812 chromosome 7, whole genome shotgun sequence.
SNP_1155881	ENA|MKGO01000007|MKGO01000007.1	96.97	66	2	0	1	66	49444995	49445060	4.15e-23	111	ENA|MKGO01000007|MKGO01000007.1	60	64	64	0	96.97	1	1	TGCAGCAAGCGACTAGCATATATGGTGGCTAACTTATTCGCAAAAGAGAGCGAGAAGAGGAGGCAA	TGCAGCAAGCGACTAGCATATATGGTGGCTAACTTATTCGCAAAGGAGGGCGAGAAGAGGAGGCAA	69	719689837	ENA|MKGO01000007|MKGO01000007.1 Triticum urartu cultivar G1812 chromosome 7, whole genome shotgun sequence.
SNP_1155881	ENA|MKGO01000007|MKGO01000007.1	96.97	66	2	0	1	66	57921472	57921537	4.15e-23	111	ENA|MKGO01000007|MKGO01000007.1	60	64	64	0	96.97	1	1	TGCAGCAAGCGACTAGCATATATGGTGGCTAACTTATTCGCAAAAGAGAGCGAGAAGAGGAGGCAA	TGCAGCAAGCGACTAGCATATATGGTGGCTAACATGTTCGCAAAAGAGAGCGAGAAGAGGAGGCAA	69	719689837	ENA|MKGO01000007|MKGO01000007.1 Triticum urartu cultivar G1812 chromosome 7, whole genome shotgun sequence.
SNP_1155881	ENA|MKGO01000007|MKGO01000007.1	96.97	66	2	0	1	66	57939580	57939645	4.15e-23	111	ENA|MKGO01000007|MKGO01000007.1	60	64	64	0	96.97	1	1	TGCAGCAAGCGACTAGCATATATGGTGGCTAACTTATTCGCAAAAGAGAGCGAGAAGAGGAGGCAA	TGCAGCAAGCGACTAGCATATATGGTGGCTAACCTGTTCGCAAAAGAGAGCGAGAAGAGGAGGCAA	69	719689837	ENA|MKGO01000007|MKGO01000007.1 Triticum urartu cultivar G1812 chromosome 7, whole genome shotgun sequence.
SNP_1155881	ENA|MKGO01000007|MKGO01000007.1	96.97	66	2	0	1	66	64224753	64224818	4.15e-23	111	ENA|MKGO01000007|MKGO01000007.1	60	64	64	0	96.97	1	1	TGCAGCAAGCGACTAGCATATATGGTGGCTAACTTATTCGCAAAAGAGAGCGAGAAGAGGAGGCAA	TGCAGCAAGCGACTAGCATATATGGTGGCTAACATATTCGCAAAAGAGAGCGAGAAGAGAAGGCAA	69	719689837	ENA|MKGO01000007|MKGO01000007.1 Triticum urartu cultivar G1812 chromosome 7, whole genome shotgun sequence.
SNP_1155881	ENA|MKGO01000007|MKGO01000007.1	96.97	66	2	0	1	66	66501901	66501966	4.15e-23	111	ENA|MKGO01000007|MKGO01000007.1	60	64	64	0	96.97	1	1	TGCAGCAAGCGACTAGCATATATGGTGGCTAACTTATTCGCAAAAGAGAGCGAGAAGAGGAGGCAA	TGCAGCAAGTGACTAGCAAATATGGTGGCTAACTTATTCGCAAAAGAGAGCGAGAAGAGGAGGCAA	69	719689837	ENA|MKGO01000007|MKGO01000007.1 Triticum urartu cultivar G1812 chromosome 7, whole genome shotgun sequence.
SNP_1155881	ENA|MKGO01000007|MKGO01000007.1	96.97	66	2	0	1	66	67827123	67827188	4.15e-23	111	ENA|MKGO01000007|MKGO01000007.1	60	64	64	0	96.97	1	1	TGCAGCAAGCGACTAGCATATATGGTGGCTAACTTATTCGCAAAAGAGAGCGAGAAGAGGAGGCAA	TGCAGCAAGCGACTAGCATATATGGTGGCTAACATATTCGCAAAAGAGAGCGAGAAGAGAAGGCAA	69	719689837	ENA|MKGO01000007|MKGO01000007.1 Triticum urartu cultivar G1812 chromosome 7, whole genome shotgun sequence.
SNP_1155881	ENA|MKGO01000007|MKGO01000007.1	96.97	66	2	0	1	66	67831138	67831203	4.15e-23	111	ENA|MKGO01000007|MKGO01000007.1	60	64	64	0	96.97	1	1	TGCAGCAAGCGACTAGCATATATGGTGGCTAACTTATTCGCAAAAGAGAGCGAGAAGAGGAGGCAA	TGCAGCAAGCGACTAGCATATATGGTGGCTAACATATTCGCAAAAGAGAGCGAGAAGAGAAGGCAA	69	719689837	ENA|MKGO01000007|MKGO01000007.1 Triticum urartu cultivar G1812 chromosome 7, whole genome shotgun sequence.
SNP_1155881	ENA|MKGO01000007|MKGO01000007.1	95.652	69	3	0	1	69	74081000	74080932	4.15e-23	111	ENA|MKGO01000007|MKGO01000007.1	60	66	66	0	95.65	1	-1	TGCAGCAAGCGACTAGCATATATGGTGGCTAACTTATTCGCAAAAGAGAGCGAGAAGAGGAGGCAAGGC	TGCAGCAAGCGACTAGCATATATGGTGGCTAACATATTCGCAAAAGAGAGCGAGAAGAGAAGGCAAAGC	69	719689837	ENA|MKGO01000007|MKGO01000007.1 Triticum urartu cultivar G1812 chromosome 7, whole genome shotgun sequence.
SNP_1155881	ENA|MKGO01000007|MKGO01000007.1	96.97	66	2	0	1	66	78084136	78084201	4.15e-23	111	ENA|MKGO01000007|MKGO01000007.1	60	64	64	0	96.97	1	1	TGCAGCAAGCGACTAGCATATATGGTGGCTAACTTATTCGCAAAAGAGAGCGAGAAGAGGAGGCAA	TGCAGCAAGCGACTAGCAAATATGGTGGCTAACTTTTTCGCAAAAGAGAGCGAGAAGAGGAGGCAA	69	719689837	ENA|MKGO01000007|MKGO01000007.1 Triticum urartu cultivar G1812 chromosome 7, whole genome shotgun sequence.
SNP_1155881	ENA|MKGO01000007|MKGO01000007.1	95.652	69	3	0	1	69	84585968	84585900	4.15e-23	111	ENA|MKGO01000007|MKGO01000007.1	60	66	66	0	95.65	1	-1	TGCAGCAAGCGACTAGCATATATGGTGGCTAACTTATTCGCAAAAGAGAGCGAGAAGAGGAGGCAAGGC	TGCAGCAAGCAACTAGCATATATGGTGGCTATCTTATTCGCAAAAGAGAGCGAGAAGAGGAGGCAAAGC	69	719689837	ENA|MKGO01000007|MKGO01000007.1 Triticum urartu cultivar G1812 chromosome 7, whole genome shotgun sequence.
SNP_1155881	ENA|MKGO01000007|MKGO01000007.1	96.97	66	2	0	1	66	84632913	84632978	4.15e-23	111	ENA|MKGO01000007|MKGO01000007.1	60	64	64	0	96.97	1	1	TGCAGCAAGCGACTAGCATATATGGTGGCTAACTTATTCGCAAAAGAGAGCGAGAAGAGGAGGCAA	TGCAGCAAGCGACTAGCAAGTATGGTGGCTAACTTATTCGCAAAAGAGAGCGAGAAGAGGAGGCAA	69	719689837	ENA|MKGO01000007|MKGO01000007.1 Triticum urartu cultivar G1812 chromosome 7, whole genome shotgun sequence.
SNP_1155881	ENA|MKGO01000007|MKGO01000007.1	95.652	69	3	0	1	69	84674370	84674302	4.15e-23	111	ENA|MKGO01000007|MKGO01000007.1	60	66	66	0	95.65	1	-1	TGCAGCAAGCGACTAGCATATATGGTGGCTAACTTATTCGCAAAAGAGAGCGAGAAGAGGAGGCAAGGC	TGCAGCAAGCGACTAGCAAGTATGGTGGCTAACTTATTCGCAAAAGAGAGCGAGAAGAGGAGGCAAAGC	69	719689837	ENA|MKGO01000007|MKGO01000007.1 Triticum urartu cultivar G1812 chromosome 7, whole genome shotgun sequence.
SNP_1155881	ENA|MKGO01000007|MKGO01000007.1	96.97	66	2	0	1	66	85325325	85325390	4.15e-23	111	ENA|MKGO01000007|MKGO01000007.1	60	64	64	0	96.97	1	1	TGCAGCAAGCGACTAGCATATATGGTGGCTAACTTATTCGCAAAAGAGAGCGAGAAGAGGAGGCAA	TGCAGCAAGCGACTAGCAAGTATGGTGGCTAACTTATTCGCAAAAGAGAGCGAGAAGAGGAGGCAA	69	719689837	ENA|MKGO01000007|MKGO01000007.1 Triticum urartu cultivar G1812 chromosome 7, whole genome shotgun sequence.
SNP_1155881	ENA|MKGO01000007|MKGO01000007.1	96.97	66	2	0	1	66	85334939	85335004	4.15e-23	111	ENA|MKGO01000007|MKGO01000007.1	60	64	64	0	96.97	1	1	TGCAGCAAGCGACTAGCATATATGGTGGCTAACTTATTCGCAAAAGAGAGCGAGAAGAGGAGGCAA	TGCAGCAAGCGACTAGCAAGTATGGTGGCTAACTTATTCGCAAAAGAGAGCGAGAAGAGGAGGCAA	69	719689837	ENA|MKGO01000007|MKGO01000007.1 Triticum urartu cultivar G1812 chromosome 7, whole genome shotgun sequence.
SNP_1155881	ENA|MKGO01000007|MKGO01000007.1	95.652	69	3	0	1	69	86187993	86187925	4.15e-23	111	ENA|MKGO01000007|MKGO01000007.1	60	66	66	0	95.65	1	-1	TGCAGCAAGCGACTAGCATATATGGTGGCTAACTTATTCGCAAAAGAGAGCGAGAAGAGGAGGCAAGGC	TGCAGCAAGCGACTAGCATATATGGTGGCTAACCTATTCGCAAAAGAGAGCGAGAAGAGAAGGCAAAGC	69	719689837	ENA|MKGO01000007|MKGO01000007.1 Triticum urartu cultivar G1812 chromosome 7, whole genome shotgun sequence.
SNP_1155881	ENA|MKGO01000007|MKGO01000007.1	96.97	66	2	0	1	66	86347205	86347270	4.15e-23	111	ENA|MKGO01000007|MKGO01000007.1	60	64	64	0	96.97	1	1	TGCAGCAAGCGACTAGCATATATGGTGGCTAACTTATTCGCAAAAGAGAGCGAGAAGAGGAGGCAA	TGCAGCAAGCGACTAGCATATATGGTGGCTAACCTATTCGCAAAAGAGAGCGAGAAGAGAAGGCAA	69	719689837	ENA|MKGO01000007|MKGO01000007.1 Triticum urartu cultivar G1812 chromosome 7, whole genome shotgun sequence.
SNP_1155881	ENA|MKGO01000007|MKGO01000007.1	95.652	69	3	0	1	69	87156935	87157003	4.15e-23	111	ENA|MKGO01000007|MKGO01000007.1	60	66	66	0	95.65	1	1	TGCAGCAAGCGACTAGCATATATGGTGGCTAACTTATTCGCAAAAGAGAGCGAGAAGAGGAGGCAAGGC	TGCAGCAAGCGACTAGCATATATGGTGGCTATCCTGTTCGCAAAAGAGAGCGAGAAGAGGAGGCAAGGC	69	719689837	ENA|MKGO01000007|MKGO01000007.1 Triticum urartu cultivar G1812 chromosome 7, whole genome shotgun sequence.
SNP_1155881	ENA|MKGO01000007|MKGO01000007.1	95.652	69	3	0	1	69	87180744	87180812	4.15e-23	111	ENA|MKGO01000007|MKGO01000007.1	60	66	66	0	95.65	1	1	TGCAGCAAGCGACTAGCATATATGGTGGCTAACTTATTCGCAAAAGAGAGCGAGAAGAGGAGGCAAGGC	TGCAGCAAGCGACTAGCATATATGGTGGCTATCCTGTTCGCAAAAGAGAGCGAGAAGAGGAGGCAAGGC	69	719689837	ENA|MKGO01000007|MKGO01000007.1 Triticum urartu cultivar G1812 chromosome 7, whole genome shotgun sequence.
SNP_1155881	ENA|MKGO01000007|MKGO01000007.1	95.652	69	3	0	1	69	87196178	87196246	4.15e-23	111	ENA|MKGO01000007|MKGO01000007.1	60	66	66	0	95.65	1	1	TGCAGCAAGCGACTAGCATATATGGTGGCTAACTTATTCGCAAAAGAGAGCGAGAAGAGGAGGCAAGGC	TGCAGCAAGCGACTAGCATATATGGTGGCTATCCTGTTCGCAAAAGAGAGCGAGAAGAGGAGGCAAGGC	69	719689837	ENA|MKGO01000007|MKGO01000007.1 Triticum urartu cultivar G1812 chromosome 7, whole genome shotgun sequence.
SNP_1155881	ENA|MKGO01000007|MKGO01000007.1	96.97	66	2	0	1	66	96612386	96612451	4.15e-23	111	ENA|MKGO01000007|MKGO01000007.1	60	64	64	0	96.97	1	1	TGCAGCAAGCGACTAGCATATATGGTGGCTAACTTATTCGCAAAAGAGAGCGAGAAGAGGAGGCAA	TGCAGCAAGCGACTAGCAAATATGGTGGCTAACTTATTCGCAAAAGAGAGCGAGAAGAGTAGGCAA	69	719689837	ENA|MKGO01000007|MKGO01000007.1 Triticum urartu cultivar G1812 chromosome 7, whole genome shotgun sequence.
SNP_1155881	ENA|MKGO01000007|MKGO01000007.1	95.652	69	3	0	1	69	104795947	104795879	4.15e-23	111	ENA|MKGO01000007|MKGO01000007.1	60	66	66	0	95.65	1	-1	TGCAGCAAGCGACTAGCATATATGGTGGCTAACTTATTCGCAAAAGAGAGCGAGAAGAGGAGGCAAGGC	TGCAGCAAGCGACTAGCATATATGGTGGCTAACTTATTCGCCAAAGAGGGCGAGAAGAGGAGGCAAAGC	69	719689837	ENA|MKGO01000007|MKGO01000007.1 Triticum urartu cultivar G1812 chromosome 7, whole genome shotgun sequence.
SNP_1155881	ENA|MKGO01000007|MKGO01000007.1	95.652	69	3	0	1	69	104805589	104805521	4.15e-23	111	ENA|MKGO01000007|MKGO01000007.1	60	66	66	0	95.65	1	-1	TGCAGCAAGCGACTAGCATATATGGTGGCTAACTTATTCGCAAAAGAGAGCGAGAAGAGGAGGCAAGGC	TGCAGCAAGCGACTAGCATATATGGTGGCTAACTTATTCGCCAAAGAGGGCGAGAAGAGGAGGCAAAGC	69	719689837	ENA|MKGO01000007|MKGO01000007.1 Triticum urartu cultivar G1812 chromosome 7, whole genome shotgun sequence.
SNP_1155881	ENA|MKGO01000007|MKGO01000007.1	96.97	66	2	0	1	66	108640731	108640796	4.15e-23	111	ENA|MKGO01000007|MKGO01000007.1	60	64	64	0	96.97	1	1	TGCAGCAAGCGACTAGCATATATGGTGGCTAACTTATTCGCAAAAGAGAGCGAGAAGAGGAGGCAA	TGCAGCAAGCGACTAGCAAGTATGGTGGCTAACTTATTCGCAAAAGAGAGCGAGAAGAGGAGGCAA	69	719689837	ENA|MKGO01000007|MKGO01000007.1 Triticum urartu cultivar G1812 chromosome 7, whole genome shotgun sequence.
SNP_1155881	ENA|MKGO01000007|MKGO01000007.1	96.97	66	2	0	1	66	109852997	109853062	4.15e-23	111	ENA|MKGO01000007|MKGO01000007.1	60	64	64	0	96.97	1	1	TGCAGCAAGCGACTAGCATATATGGTGGCTAACTTATTCGCAAAAGAGAGCGAGAAGAGGAGGCAA	TGCAGCAAGCGACTAGCAAGTATGGTGGCTAACTTATTCGCAAAAGAGAGCGAGAAGAGGAGGCAA	69	719689837	ENA|MKGO01000007|MKGO01000007.1 Triticum urartu cultivar G1812 chromosome 7, whole genome shotgun sequence.
SNP_1155881	ENA|MKGO01000007|MKGO01000007.1	95.652	69	3	0	1	69	111487342	111487274	4.15e-23	111	ENA|MKGO01000007|MKGO01000007.1	60	66	66	0	95.65	1	-1	TGCAGCAAGCGACTAGCATATATGGTGGCTAACTTATTCGCAAAAGAGAGCGAGAAGAGGAGGCAAGGC	TGCAGCAAGCGACTAGCAAGTATGGTGGCTAACTTATTCGCAAAAGAGAGCGAGAAGAGGAGGCAAAGC	69	719689837	ENA|MKGO01000007|MKGO01000007.1 Triticum urartu cultivar G1812 chromosome 7, whole genome shotgun sequence.
SNP_1155881	ENA|MKGO01000007|MKGO01000007.1	96.97	66	2	0	1	66	117497298	117497363	4.15e-23	111	ENA|MKGO01000007|MKGO01000007.1	60	64	64	0	96.97	1	1	TGCAGCAAGCGACTAGCATATATGGTGGCTAACTTATTCGCAAAAGAGAGCGAGAAGAGGAGGCAA	TGCAGCAAGCGACTAGCATATATGGTGGCTAACTTATACGCAAAAGAGAGCGAGAAGAGGATGCAA	69	719689837	ENA|MKGO01000007|MKGO01000007.1 Triticum urartu cultivar G1812 chromosome 7, whole genome shotgun sequence.
SNP_1155881	ENA|MKGO01000007|MKGO01000007.1	96.97	66	2	0	1	66	117506890	117506955	4.15e-23	111	ENA|MKGO01000007|MKGO01000007.1	60	64	64	0	96.97	1	1	TGCAGCAAGCGACTAGCATATATGGTGGCTAACTTATTCGCAAAAGAGAGCGAGAAGAGGAGGCAA	TGCAGCAAGCGACTAGCATATATGGTGGCTAACTTATACGCAAAAGAGAGCGAGAAGAGGACGCAA	69	719689837	ENA|MKGO01000007|MKGO01000007.1 Triticum urartu cultivar G1812 chromosome 7, whole genome shotgun sequence.
SNP_1155881	ENA|MKGO01000007|MKGO01000007.1	95.652	69	3	0	1	69	130193271	130193203	4.15e-23	111	ENA|MKGO01000007|MKGO01000007.1	60	66	66	0	95.65	1	-1	TGCAGCAAGCGACTAGCATATATGGTGGCTAACTTATTCGCAAAAGAGAGCGAGAAGAGGAGGCAAGGC	TGCAGCAAGCGACTAGCAAGTATGGTGGCTAACTTATTCGCAAAAGAGAGCGAGAAGAGGAGGCAAAGC	69	719689837	ENA|MKGO01000007|MKGO01000007.1 Triticum urartu cultivar G1812 chromosome 7, whole genome shotgun sequence.
SNP_1155881	ENA|MKGO01000007|MKGO01000007.1	95.652	69	3	0	1	69	132662904	132662836	4.15e-23	111	ENA|MKGO01000007|MKGO01000007.1	60	66	66	0	95.65	1	-1	TGCAGCAAGCGACTAGCATATATGGTGGCTAACTTATTCGCAAAAGAGAGCGAGAAGAGGAGGCAAGGC	TGCAGCCAGCGACTAGCATATATGGTGGCTAACTTATTCGCAAAGGAGAGCGAGAAGAGGAGGCAAAGC	69	719689837	ENA|MKGO01000007|MKGO01000007.1 Triticum urartu cultivar G1812 chromosome 7, whole genome shotgun sequence.
SNP_1155881	ENA|MKGO01000007|MKGO01000007.1	95.652	69	3	0	1	69	135058417	135058349	4.15e-23	111	ENA|MKGO01000007|MKGO01000007.1	60	66	66	0	95.65	1	-1	TGCAGCAAGCGACTAGCATATATGGTGGCTAACTTATTCGCAAAAGAGAGCGAGAAGAGGAGGCAAGGC	TGCAGCAAGCGACTAGCATATATGGTGGCTAACCTATTCGCAAAAGAGAGCGAGAAGAGAAGGCAAAGC	69	719689837	ENA|MKGO01000007|MKGO01000007.1 Triticum urartu cultivar G1812 chromosome 7, whole genome shotgun sequence.
SNP_1155881	ENA|MKGO01000007|MKGO01000007.1	95.652	69	3	0	1	69	136077949	136077881	4.15e-23	111	ENA|MKGO01000007|MKGO01000007.1	60	66	66	0	95.65	1	-1	TGCAGCAAGCGACTAGCATATATGGTGGCTAACTTATTCGCAAAAGAGAGCGAGAAGAGGAGGCAAGGC	TGCAGCAAGCGACTAGCATATATGGTGGCTAAATTATTCGCAAAGGAGAGCGAGAAGAGGAGGCAAAGC	69	719689837	ENA|MKGO01000007|MKGO01000007.1 Triticum urartu cultivar G1812 chromosome 7, whole genome shotgun sequence.
SNP_1155881	ENA|MKGO01000007|MKGO01000007.1	95.652	69	3	0	1	69	140074500	140074432	4.15e-23	111	ENA|MKGO01000007|MKGO01000007.1	60	66	66	0	95.65	1	-1	TGCAGCAAGCGACTAGCATATATGGTGGCTAACTTATTCGCAAAAGAGAGCGAGAAGAGGAGGCAAGGC	TGCAGCAAGCGACTAGCAAGTATGGTGGCTAACTTATTCGCAAAAGAGAGCGAGAAGAGGAGGCAAAGC	69	719689837	ENA|MKGO01000007|MKGO01000007.1 Triticum urartu cultivar G1812 chromosome 7, whole genome shotgun sequence.
SNP_1155881	ENA|MKGO01000007|MKGO01000007.1	95.652	69	3	0	1	69	144763637	144763569	4.15e-23	111	ENA|MKGO01000007|MKGO01000007.1	60	66	66	0	95.65	1	-1	TGCAGCAAGCGACTAGCATATATGGTGGCTAACTTATTCGCAAAAGAGAGCGAGAAGAGGAGGCAAGGC	TGCAGCAAGCGACTAGCATATCTGGTGGCTAACCTATTCGCAAAAGAGAGCGAGAAGAGGAGGCAAAGC	69	719689837	ENA|MKGO01000007|MKGO01000007.1 Triticum urartu cultivar G1812 chromosome 7, whole genome shotgun sequence.
SNP_1155881	ENA|MKGO01000007|MKGO01000007.1	96.97	66	2	0	1	66	145239644	145239709	4.15e-23	111	ENA|MKGO01000007|MKGO01000007.1	60	64	64	0	96.97	1	1	TGCAGCAAGCGACTAGCATATATGGTGGCTAACTTATTCGCAAAAGAGAGCGAGAAGAGGAGGCAA	TGCAGCAAGCGACTAGCAAATATGATGGCTAACTTATTCGCAAAAGAGAGCGAGAAGAGGAGGCAA	69	719689837	ENA|MKGO01000007|MKGO01000007.1 Triticum urartu cultivar G1812 chromosome 7, whole genome shotgun sequence.
SNP_1155881	ENA|MKGO01000007|MKGO01000007.1	95.652	69	3	0	1	69	146614973	146614905	4.15e-23	111	ENA|MKGO01000007|MKGO01000007.1	60	66	66	0	95.65	1	-1	TGCAGCAAGCGACTAGCATATATGGTGGCTAACTTATTCGCAAAAGAGAGCGAGAAGAGGAGGCAAGGC	TGCAGCAAGCGACTAGCAAGTATGGTGGCTAACTTATTCGCAAAAGAGAGCGAGAAGAGGAGGCAAAGC	69	719689837	ENA|MKGO01000007|MKGO01000007.1 Triticum urartu cultivar G1812 chromosome 7, whole genome shotgun sequence.
SNP_1155881	ENA|MKGO01000007|MKGO01000007.1	95.652	69	3	0	1	69	146638346	146638278	4.15e-23	111	ENA|MKGO01000007|MKGO01000007.1	60	66	66	0	95.65	1	-1	TGCAGCAAGCGACTAGCATATATGGTGGCTAACTTATTCGCAAAAGAGAGCGAGAAGAGGAGGCAAGGC	TGCAGCAAGCGACTAGCAAGTATGGTGGCTAACTTATTCGCAAAAGAGAGCGAGAAGAGGAGGCAAAGC	69	719689837	ENA|MKGO01000007|MKGO01000007.1 Triticum urartu cultivar G1812 chromosome 7, whole genome shotgun sequence.
SNP_1155881	ENA|MKGO01000007|MKGO01000007.1	96.97	66	2	0	1	66	148660432	148660497	4.15e-23	111	ENA|MKGO01000007|MKGO01000007.1	60	64	64	0	96.97	1	1	TGCAGCAAGCGACTAGCATATATGGTGGCTAACTTATTCGCAAAAGAGAGCGAGAAGAGGAGGCAA	TGCAGCAAGCGACTAGCAAATATGGTGGCTAACTTATTCGCAAAAGAGAGCGAGAAGAGGGGGCAA	69	719689837	ENA|MKGO01000007|MKGO01000007.1 Triticum urartu cultivar G1812 chromosome 7, whole genome shotgun sequence.
SNP_1155881	ENA|MKGO01000007|MKGO01000007.1	96.97	66	2	0	1	66	148682860	148682925	4.15e-23	111	ENA|MKGO01000007|MKGO01000007.1	60	64	64	0	96.97	1	1	TGCAGCAAGCGACTAGCATATATGGTGGCTAACTTATTCGCAAAAGAGAGCGAGAAGAGGAGGCAA	TGCAGCAAGCGACTAGCAAATATGGTGGCTAACTTATTCGCAAAAGAGAGCGAGAAGAGGGGGCAA	69	719689837	ENA|MKGO01000007|MKGO01000007.1 Triticum urartu cultivar G1812 chromosome 7, whole genome shotgun sequence.
SNP_1155881	ENA|MKGO01000007|MKGO01000007.1	95.652	69	3	0	1	69	150189184	150189116	4.15e-23	111	ENA|MKGO01000007|MKGO01000007.1	60	66	66	0	95.65	1	-1	TGCAGCAAGCGACTAGCATATATGGTGGCTAACTTATTCGCAAAAGAGAGCGAGAAGAGGAGGCAAGGC	TGCAGCAAGCGACTAGCAAGTATGGTGGCTAACTTATACGCAAAAGAGAGCGAGAAGAGGAGGCAAGGC	69	719689837	ENA|MKGO01000007|MKGO01000007.1 Triticum urartu cultivar G1812 chromosome 7, whole genome shotgun sequence.
SNP_1155881	ENA|MKGO01000007|MKGO01000007.1	96.97	66	2	0	1	66	150448230	150448295	4.15e-23	111	ENA|MKGO01000007|MKGO01000007.1	60	64	64	0	96.97	1	1	TGCAGCAAGCGACTAGCATATATGGTGGCTAACTTATTCGCAAAAGAGAGCGAGAAGAGGAGGCAA	TGCAGCAAGCGACTAGCATTTATGGTGGCTAACTTATACGCAAAAGAGAGCGAGAAGAGGAGGCAA	69	719689837	ENA|MKGO01000007|MKGO01000007.1 Triticum urartu cultivar G1812 chromosome 7, whole genome shotgun sequence.
SNP_1155881	ENA|MKGO01000007|MKGO01000007.1	96.97	66	2	0	1	66	154435703	154435768	4.15e-23	111	ENA|MKGO01000007|MKGO01000007.1	60	64	64	0	96.97	1	1	TGCAGCAAGCGACTAGCATATATGGTGGCTAACTTATTCGCAAAAGAGAGCGAGAAGAGGAGGCAA	TGCAGCAAGCGACTAGCATATATGGTGGCTACCTTATACGCAAAAGAGAGCGAGAAGAGGAGGCAA	69	719689837	ENA|MKGO01000007|MKGO01000007.1 Triticum urartu cultivar G1812 chromosome 7, whole genome shotgun sequence.
SNP_1155881	ENA|MKGO01000007|MKGO01000007.1	96.97	66	2	0	1	66	161251698	161251763	4.15e-23	111	ENA|MKGO01000007|MKGO01000007.1	60	64	64	0	96.97	1	1	TGCAGCAAGCGACTAGCATATATGGTGGCTAACTTATTCGCAAAAGAGAGCGAGAAGAGGAGGCAA	TGCAGCAAGCGACTAGCAAGTATGGTGGCTAACTTATTCGCAAAAGAGAGCGAGAAGAGGAGGCAA	69	719689837	ENA|MKGO01000007|MKGO01000007.1 Triticum urartu cultivar G1812 chromosome 7, whole genome shotgun sequence.
SNP_1155881	ENA|MKGO01000007|MKGO01000007.1	96.97	66	2	0	1	66	161470592	161470657	4.15e-23	111	ENA|MKGO01000007|MKGO01000007.1	60	64	64	0	96.97	1	1	TGCAGCAAGCGACTAGCATATATGGTGGCTAACTTATTCGCAAAAGAGAGCGAGAAGAGGAGGCAA	TGCAGCAAGCGACTAGCATATATGGTGGCTAACTTATACGCAAAAGAGAGCAAGAAGAGGAGGCAA	69	719689837	ENA|MKGO01000007|MKGO01000007.1 Triticum urartu cultivar G1812 chromosome 7, whole genome shotgun sequence.
SNP_1155881	ENA|MKGO01000007|MKGO01000007.1	96.97	66	2	0	1	66	162862707	162862642	4.15e-23	111	ENA|MKGO01000007|MKGO01000007.1	60	64	64	0	96.97	1	-1	TGCAGCAAGCGACTAGCATATATGGTGGCTAACTTATTCGCAAAAGAGAGCGAGAAGAGGAGGCAA	TGCAGCAAGCGACTAGCATATATGGTGGCTAACATATTCGCAAAAGAGAGCGAGAAGAGAAGGCAA	69	719689837	ENA|MKGO01000007|MKGO01000007.1 Triticum urartu cultivar G1812 chromosome 7, whole genome shotgun sequence.
SNP_1155881	ENA|MKGO01000007|MKGO01000007.1	96.97	66	2	0	1	66	167607590	167607655	4.15e-23	111	ENA|MKGO01000007|MKGO01000007.1	60	64	64	0	96.97	1	1	TGCAGCAAGCGACTAGCATATATGGTGGCTAACTTATTCGCAAAAGAGAGCGAGAAGAGGAGGCAA	TGCAGCAAGCGACTAGCATATATGGTGGCTAACTAATACGCAAAAGAGAGCGAGAAGAGGAGGCAA	69	719689837	ENA|MKGO01000007|MKGO01000007.1 Triticum urartu cultivar G1812 chromosome 7, whole genome shotgun sequence.
SNP_1155881	ENA|MKGO01000007|MKGO01000007.1	96.97	66	2	0	1	66	167617233	167617298	4.15e-23	111	ENA|MKGO01000007|MKGO01000007.1	60	64	64	0	96.97	1	1	TGCAGCAAGCGACTAGCATATATGGTGGCTAACTTATTCGCAAAAGAGAGCGAGAAGAGGAGGCAA	TGCAGCAAGCGACTAGCATGTATGGTGGCTAACTTATACGCAAAAGAGAGCGAGAAGAGGAGGCAA	69	719689837	ENA|MKGO01000007|MKGO01000007.1 Triticum urartu cultivar G1812 chromosome 7, whole genome shotgun sequence.
SNP_1155881	ENA|MKGO01000007|MKGO01000007.1	96.97	66	2	0	1	66	168156792	168156727	4.15e-23	111	ENA|MKGO01000007|MKGO01000007.1	60	64	64	0	96.97	1	-1	TGCAGCAAGCGACTAGCATATATGGTGGCTAACTTATTCGCAAAAGAGAGCGAGAAGAGGAGGCAA	TGCAGCAAGCGACTAGCATATATGGTGGCTAACCTATTCGCAAAAGAGAGCGAGAAGAGAAGGCAA	69	719689837	ENA|MKGO01000007|MKGO01000007.1 Triticum urartu cultivar G1812 chromosome 7, whole genome shotgun sequence.
SNP_1155881	ENA|MKGO01000007|MKGO01000007.1	95.652	69	3	0	1	69	177281139	177281207	4.15e-23	111	ENA|MKGO01000007|MKGO01000007.1	60	66	66	0	95.65	1	1	TGCAGCAAGCGACTAGCATATATGGTGGCTAACTTATTCGCAAAAGAGAGCGAGAAGAGGAGGCAAGGC	TGCAGCAAGCGACTAGCATATATGGTGGCTAACCTGTTCGCAAAAGAGAGCGAGAAGAGAAGGCAAGGC	69	719689837	ENA|MKGO01000007|MKGO01000007.1 Triticum urartu cultivar G1812 chromosome 7, whole genome shotgun sequence.
SNP_1155881	ENA|MKGO01000007|MKGO01000007.1	96.97	66	2	0	1	66	180498505	180498570	4.15e-23	111	ENA|MKGO01000007|MKGO01000007.1	60	64	64	0	96.97	1	1	TGCAGCAAGCGACTAGCATATATGGTGGCTAACTTATTCGCAAAAGAGAGCGAGAAGAGGAGGCAA	TGCAGCAAGCGACTAGCAAGTATGGTGGCTAACTTATTCGCAAAAGAGAGCGAGAAGAGGAGGCAA	69	719689837	ENA|MKGO01000007|MKGO01000007.1 Triticum urartu cultivar G1812 chromosome 7, whole genome shotgun sequence.
SNP_1155881	ENA|MKGO01000007|MKGO01000007.1	96.97	66	2	0	1	66	181228894	181228829	4.15e-23	111	ENA|MKGO01000007|MKGO01000007.1	60	64	64	0	96.97	1	-1	TGCAGCAAGCGACTAGCATATATGGTGGCTAACTTATTCGCAAAAGAGAGCGAGAAGAGGAGGCAA	TGCAGCAAGCGACTAGCATATATGGTGGCTAACCTATTCGCAAAAGAGAGCGAGAAGAGAAGGCAA	69	719689837	ENA|MKGO01000007|MKGO01000007.1 Triticum urartu cultivar G1812 chromosome 7, whole genome shotgun sequence.
SNP_1155881	ENA|MKGO01000007|MKGO01000007.1	96.97	66	2	0	1	66	181872950	181873015	4.15e-23	111	ENA|MKGO01000007|MKGO01000007.1	60	64	64	0	96.97	1	1	TGCAGCAAGCGACTAGCATATATGGTGGCTAACTTATTCGCAAAAGAGAGCGAGAAGAGGAGGCAA	TGCAGCAAGCGACTAGCAAGTATGGTGGCTAACTTATTCGCAAAAGAGAGCGAGAAGAGGAGGCAA	69	719689837	ENA|MKGO01000007|MKGO01000007.1 Triticum urartu cultivar G1812 chromosome 7, whole genome shotgun sequence.
SNP_1155881	ENA|MKGO01000007|MKGO01000007.1	96.97	66	2	0	1	66	183920688	183920753	4.15e-23	111	ENA|MKGO01000007|MKGO01000007.1	60	64	64	0	96.97	1	1	TGCAGCAAGCGACTAGCATATATGGTGGCTAACTTATTCGCAAAAGAGAGCGAGAAGAGGAGGCAA	TGCAGCAAGCGACTAGCATATGTGGTGGCTAACTTATCCGCAAAAGAGAGCGAGAAGAGGAGGCAA	69	719689837	ENA|MKGO01000007|MKGO01000007.1 Triticum urartu cultivar G1812 chromosome 7, whole genome shotgun sequence.
SNP_1155881	ENA|MKGO01000007|MKGO01000007.1	95.652	69	3	0	1	69	184057041	184056973	4.15e-23	111	ENA|MKGO01000007|MKGO01000007.1	60	66	66	0	95.65	1	-1	TGCAGCAAGCGACTAGCATATATGGTGGCTAACTTATTCGCAAAAGAGAGCGAGAAGAGGAGGCAAGGC	TGCAGCAAGCGACTAGCAAGTATGGTGGCTAACTTATTCGCAAAAGAGAGCGAGAAGAGGAGGCAAAGC	69	719689837	ENA|MKGO01000007|MKGO01000007.1 Triticum urartu cultivar G1812 chromosome 7, whole genome shotgun sequence.
SNP_1155881	ENA|MKGO01000007|MKGO01000007.1	95.652	69	3	0	1	69	184636117	184636049	4.15e-23	111	ENA|MKGO01000007|MKGO01000007.1	60	66	66	0	95.65	1	-1	TGCAGCAAGCGACTAGCATATATGGTGGCTAACTTATTCGCAAAAGAGAGCGAGAAGAGGAGGCAAGGC	TGCAGCAAGCGACTAGCAAGTATGGTGGCTAACTTATTCGCAAAAGAGAGCGAGAAGAGGAGGCAAAGC	69	719689837	ENA|MKGO01000007|MKGO01000007.1 Triticum urartu cultivar G1812 chromosome 7, whole genome shotgun sequence.
SNP_1155881	ENA|MKGO01000007|MKGO01000007.1	95.652	69	3	0	1	69	189915875	189915807	4.15e-23	111	ENA|MKGO01000007|MKGO01000007.1	60	66	66	0	95.65	1	-1	TGCAGCAAGCGACTAGCATATATGGTGGCTAACTTATTCGCAAAAGAGAGCGAGAAGAGGAGGCAAGGC	TGCAGCAAGCGACTAGCAAGTATGGTGGCTAACTTATTCGCAAAAGAGAGCGAGAAGAGGAGGCAAAGC	69	719689837	ENA|MKGO01000007|MKGO01000007.1 Triticum urartu cultivar G1812 chromosome 7, whole genome shotgun sequence.
SNP_1155881	ENA|MKGO01000007|MKGO01000007.1	96.97	66	2	0	1	66	190418171	190418236	4.15e-23	111	ENA|MKGO01000007|MKGO01000007.1	60	64	64	0	96.97	1	1	TGCAGCAAGCGACTAGCATATATGGTGGCTAACTTATTCGCAAAAGAGAGCGAGAAGAGGAGGCAA	TGCAGCAAGCGACTAGCAAGTATGGTGGCTAACTTATTCGCAAAAGAGAGCGAGAAGAGGAGGCAA	69	719689837	ENA|MKGO01000007|MKGO01000007.1 Triticum urartu cultivar G1812 chromosome 7, whole genome shotgun sequence.
SNP_1155881	ENA|MKGO01000007|MKGO01000007.1	95.652	69	3	0	1	69	192762017	192761949	4.15e-23	111	ENA|MKGO01000007|MKGO01000007.1	60	66	66	0	95.65	1	-1	TGCAGCAAGCGACTAGCATATATGGTGGCTAACTTATTCGCAAAAGAGAGCGAGAAGAGGAGGCAAGGC	TGCAGCAAGCGACTAGCAAGTATGGTGGCTAACTTATTCGCAAAAGAGAGCGAGAAGAGGAGGCAAAGC	69	719689837	ENA|MKGO01000007|MKGO01000007.1 Triticum urartu cultivar G1812 chromosome 7, whole genome shotgun sequence.
SNP_1155881	ENA|MKGO01000007|MKGO01000007.1	96.97	66	2	0	1	66	196859964	196860029	4.15e-23	111	ENA|MKGO01000007|MKGO01000007.1	60	64	64	0	96.97	1	1	TGCAGCAAGCGACTAGCATATATGGTGGCTAACTTATTCGCAAAAGAGAGCGAGAAGAGGAGGCAA	TGCGGCAAGCGACTAGCATATATGGTGGCTAACTTATTCGCAAAAGAGAGCGAGAAGAGAAGGCAA	69	719689837	ENA|MKGO01000007|MKGO01000007.1 Triticum urartu cultivar G1812 chromosome 7, whole genome shotgun sequence.
SNP_1155881	ENA|MKGO01000007|MKGO01000007.1	96.97	66	2	0	1	66	196971744	196971809	4.15e-23	111	ENA|MKGO01000007|MKGO01000007.1	60	64	64	0	96.97	1	1	TGCAGCAAGCGACTAGCATATATGGTGGCTAACTTATTCGCAAAAGAGAGCGAGAAGAGGAGGCAA	TGCAGCAAGCGACTAGCATATGTGGTGGCTAACTTATACGCAAAAGAGAGCGAGAAGAGGAGGCAA	69	719689837	ENA|MKGO01000007|MKGO01000007.1 Triticum urartu cultivar G1812 chromosome 7, whole genome shotgun sequence.
SNP_1155881	ENA|MKGO01000007|MKGO01000007.1	95.652	69	3	0	1	69	198710492	198710424	4.15e-23	111	ENA|MKGO01000007|MKGO01000007.1	60	66	66	0	95.65	1	-1	TGCAGCAAGCGACTAGCATATATGGTGGCTAACTTATTCGCAAAAGAGAGCGAGAAGAGGAGGCAAGGC	TGCAGCAAGCGACTAGCATATATGGTGGCTAACCTATTCGCAAAAGAGAGCGAGAAGAGAAGGCAAAGC	69	719689837	ENA|MKGO01000007|MKGO01000007.1 Triticum urartu cultivar G1812 chromosome 7, whole genome shotgun sequence.
SNP_1155881	ENA|MKGO01000007|MKGO01000007.1	95.652	69	3	0	1	69	198720074	198720006	4.15e-23	111	ENA|MKGO01000007|MKGO01000007.1	60	66	66	0	95.65	1	-1	TGCAGCAAGCGACTAGCATATATGGTGGCTAACTTATTCGCAAAAGAGAGCGAGAAGAGGAGGCAAGGC	TGCAGCAAGCGACTAGCATATATGGTGGCTAACCTATTCGCAAAAGAGAGCGAGAAGAGAAGGCAAAGC	69	719689837	ENA|MKGO01000007|MKGO01000007.1 Triticum urartu cultivar G1812 chromosome 7, whole genome shotgun sequence.
SNP_1155881	ENA|MKGO01000007|MKGO01000007.1	95.652	69	3	0	1	69	200636585	200636517	4.15e-23	111	ENA|MKGO01000007|MKGO01000007.1	60	66	66	0	95.65	1	-1	TGCAGCAAGCGACTAGCATATATGGTGGCTAACTTATTCGCAAAAGAGAGCGAGAAGAGGAGGCAAGGC	TGCAGCAAGCGACTAGCAAATATGGTGGCTAACTTGTTCGCAAAAGAGAGCGAGAAGAGGAGGCAAAGC	69	719689837	ENA|MKGO01000007|MKGO01000007.1 Triticum urartu cultivar G1812 chromosome 7, whole genome shotgun sequence.
SNP_1155881	ENA|MKGO01000007|MKGO01000007.1	95.652	69	3	0	1	69	201120702	201120634	4.15e-23	111	ENA|MKGO01000007|MKGO01000007.1	60	66	66	0	95.65	1	-1	TGCAGCAAGCGACTAGCATATATGGTGGCTAACTTATTCGCAAAAGAGAGCGAGAAGAGGAGGCAAGGC	TGCAGCAAGCGACTAGCAAATATGGTGGCTAGCTTATTCGCAAAAGAGAGCGAGAAGAGGAGGCAAAGC	69	719689837	ENA|MKGO01000007|MKGO01000007.1 Triticum urartu cultivar G1812 chromosome 7, whole genome shotgun sequence.
SNP_1155881	ENA|MKGO01000007|MKGO01000007.1	96.97	66	2	0	1	66	202287185	202287250	4.15e-23	111	ENA|MKGO01000007|MKGO01000007.1	60	64	64	0	96.97	1	1	TGCAGCAAGCGACTAGCATATATGGTGGCTAACTTATTCGCAAAAGAGAGCGAGAAGAGGAGGCAA	TGCAGCAAGCGACTAGCATATATGGTGGATAACTTATTCGCAAAGGAGAGCGAGAAGAGGAGGCAA	69	719689837	ENA|MKGO01000007|MKGO01000007.1 Triticum urartu cultivar G1812 chromosome 7, whole genome shotgun sequence.
SNP_1155881	ENA|MKGO01000007|MKGO01000007.1	96.97	66	2	0	1	66	202846915	202846850	4.15e-23	111	ENA|MKGO01000007|MKGO01000007.1	60	64	64	0	96.97	1	-1	TGCAGCAAGCGACTAGCATATATGGTGGCTAACTTATTCGCAAAAGAGAGCGAGAAGAGGAGGCAA	TGCAGCAAGCGACTAGCATATATGGTGGCTAACTTATACGCAAAAGAGAGCGGGAAGAGGAGGCAA	69	719689837	ENA|MKGO01000007|MKGO01000007.1 Triticum urartu cultivar G1812 chromosome 7, whole genome shotgun sequence.
SNP_1155881	ENA|MKGO01000007|MKGO01000007.1	95.652	69	3	0	1	69	203704598	203704530	4.15e-23	111	ENA|MKGO01000007|MKGO01000007.1	60	66	66	0	95.65	1	-1	TGCAGCAAGCGACTAGCATATATGGTGGCTAACTTATTCGCAAAAGAGAGCGAGAAGAGGAGGCAAGGC	TGCAGCAAGCGACTAGCATATATGGTGGCTAACCTGTTCGCAAAAGAGAGCGAGAAGAGGAGGCAAAGC	69	719689837	ENA|MKGO01000007|MKGO01000007.1 Triticum urartu cultivar G1812 chromosome 7, whole genome shotgun sequence.
SNP_1155881	ENA|MKGO01000007|MKGO01000007.1	95.652	69	3	0	1	69	203714218	203714150	4.15e-23	111	ENA|MKGO01000007|MKGO01000007.1	60	66	66	0	95.65	1	-1	TGCAGCAAGCGACTAGCATATATGGTGGCTAACTTATTCGCAAAAGAGAGCGAGAAGAGGAGGCAAGGC	TGCAGCAAGCGACTAGCATATATGGTGGCTAACCTGTTCGCAAAAGAGAGCGAGAAGAGGAGGCAAAGC	69	719689837	ENA|MKGO01000007|MKGO01000007.1 Triticum urartu cultivar G1812 chromosome 7, whole genome shotgun sequence.
SNP_1155881	ENA|MKGO01000007|MKGO01000007.1	95.714	70	2	1	1	69	204054687	204054618	4.15e-23	111	ENA|MKGO01000007|MKGO01000007.1	60	67	67	1	95.71	1	-1	TGCAGCAAGCGACTAGCA-TATATGGTGGCTAACTTATTCGCAAAAGAGAGCGAGAAGAGGAGGCAAGGC	TGCAGCAAGCGACTAGCAAAATATGGTGGCTAACTTATTCGCAAAAGAGAGCGAGAAGAGGAGGCAAAGC	69	719689837	ENA|MKGO01000007|MKGO01000007.1 Triticum urartu cultivar G1812 chromosome 7, whole genome shotgun sequence.
SNP_1155881	ENA|MKGO01000007|MKGO01000007.1	95.652	69	3	0	1	69	204410939	204410871	4.15e-23	111	ENA|MKGO01000007|MKGO01000007.1	60	66	66	0	95.65	1	-1	TGCAGCAAGCGACTAGCATATATGGTGGCTAACTTATTCGCAAAAGAGAGCGAGAAGAGGAGGCAAGGC	TGCAGCAAGCGACTAGCAAGTATGGTGGCTAACTTATTCGCAAAAGAGAGCGAGAAGAGGAGGCAAAGC	69	719689837	ENA|MKGO01000007|MKGO01000007.1 Triticum urartu cultivar G1812 chromosome 7, whole genome shotgun sequence.
SNP_1155881	ENA|MKGO01000007|MKGO01000007.1	96.97	66	2	0	1	66	205084434	205084499	4.15e-23	111	ENA|MKGO01000007|MKGO01000007.1	60	64	64	0	96.97	1	1	TGCAGCAAGCGACTAGCATATATGGTGGCTAACTTATTCGCAAAAGAGAGCGAGAAGAGGAGGCAA	TGCAGCAAGCGACTAGCAAGTATGGTGGCTAACTTATTCGCAAAAGAGAGCGAGAAGAGGAGGCAA	69	719689837	ENA|MKGO01000007|MKGO01000007.1 Triticum urartu cultivar G1812 chromosome 7, whole genome shotgun sequence.
SNP_1155881	ENA|MKGO01000007|MKGO01000007.1	95.652	69	3	0	1	69	205215805	205215737	4.15e-23	111	ENA|MKGO01000007|MKGO01000007.1	60	66	66	0	95.65	1	-1	TGCAGCAAGCGACTAGCATATATGGTGGCTAACTTATTCGCAAAAGAGAGCGAGAAGAGGAGGCAAGGC	TGCAGCAAGCGACTAGCAAATATGGTGGCTAACCTATTCGCAAAAGAGAGCGAGAAGAGGAGGCAAAGC	69	719689837	ENA|MKGO01000007|MKGO01000007.1 Triticum urartu cultivar G1812 chromosome 7, whole genome shotgun sequence.
SNP_1155881	ENA|MKGO01000007|MKGO01000007.1	96.97	66	2	0	1	66	209667453	209667388	4.15e-23	111	ENA|MKGO01000007|MKGO01000007.1	60	64	64	0	96.97	1	-1	TGCAGCAAGCGACTAGCATATATGGTGGCTAACTTATTCGCAAAAGAGAGCGAGAAGAGGAGGCAA	TGCAGCAAGCGACTAGCATATATGGTGGCTAACATATTCGCAAAAGAGAGCGAGAAGAGAAGGCAA	69	719689837	ENA|MKGO01000007|MKGO01000007.1 Triticum urartu cultivar G1812 chromosome 7, whole genome shotgun sequence.
SNP_1155881	ENA|MKGO01000007|MKGO01000007.1	95.652	69	3	0	1	69	211018834	211018766	4.15e-23	111	ENA|MKGO01000007|MKGO01000007.1	60	66	66	0	95.65	1	-1	TGCAGCAAGCGACTAGCATATATGGTGGCTAACTTATTCGCAAAAGAGAGCGAGAAGAGGAGGCAAGGC	TGCAGCAAGCGACTAGCAAGTATGGTGGCTAACTTATTCGCAAAAGAGAGCGAGAAGAGGAGGCAAAGC	69	719689837	ENA|MKGO01000007|MKGO01000007.1 Triticum urartu cultivar G1812 chromosome 7, whole genome shotgun sequence.
SNP_1155881	ENA|MKGO01000007|MKGO01000007.1	96.97	66	2	0	1	66	211950078	211950143	4.15e-23	111	ENA|MKGO01000007|MKGO01000007.1	60	64	64	0	96.97	1	1	TGCAGCAAGCGACTAGCATATATGGTGGCTAACTTATTCGCAAAAGAGAGCGAGAAGAGGAGGCAA	TGCAGCAAGCGACTAGCAAGTATGGTGGCTAACTTATTCGCAAAAGAGAGCGAGAAGAGGAGGCAA	69	719689837	ENA|MKGO01000007|MKGO01000007.1 Triticum urartu cultivar G1812 chromosome 7, whole genome shotgun sequence.
SNP_1155881	ENA|MKGO01000007|MKGO01000007.1	96.97	66	2	0	1	66	215030579	215030514	4.15e-23	111	ENA|MKGO01000007|MKGO01000007.1	60	64	64	0	96.97	1	-1	TGCAGCAAGCGACTAGCATATATGGTGGCTAACTTATTCGCAAAAGAGAGCGAGAAGAGGAGGCAA	TGCAGCAAGCGACTAGCATATATGGTGGCTAACATATTCGCAAAAGAGAGCGAGAAGAGGAGGTAA	69	719689837	ENA|MKGO01000007|MKGO01000007.1 Triticum urartu cultivar G1812 chromosome 7, whole genome shotgun sequence.
SNP_1155881	ENA|MKGO01000007|MKGO01000007.1	96.97	66	2	0	1	66	215059411	215059346	4.15e-23	111	ENA|MKGO01000007|MKGO01000007.1	60	64	64	0	96.97	1	-1	TGCAGCAAGCGACTAGCATATATGGTGGCTAACTTATTCGCAAAAGAGAGCGAGAAGAGGAGGCAA	TGCAGCAAGCGACTAGCATATATGGTGGCTAACATATTCGCAAAAGAGAGCGAGAAGAGGAGGAAA	69	719689837	ENA|MKGO01000007|MKGO01000007.1 Triticum urartu cultivar G1812 chromosome 7, whole genome shotgun sequence.
SNP_1155881	ENA|MKGO01000007|MKGO01000007.1	96.97	66	2	0	1	66	216176672	216176737	4.15e-23	111	ENA|MKGO01000007|MKGO01000007.1	60	64	64	0	96.97	1	1	TGCAGCAAGCGACTAGCATATATGGTGGCTAACTTATTCGCAAAAGAGAGCGAGAAGAGGAGGCAA	TGCAGCAAGCGACTAGCAAATATGGTGGCTAACTTATTCGCAAAAGAGAGCGAGAAGAGGAAGCAA	69	719689837	ENA|MKGO01000007|MKGO01000007.1 Triticum urartu cultivar G1812 chromosome 7, whole genome shotgun sequence.
SNP_1155881	ENA|MKGO01000007|MKGO01000007.1	95.652	69	3	0	1	69	220546774	220546706	4.15e-23	111	ENA|MKGO01000007|MKGO01000007.1	60	66	66	0	95.65	1	-1	TGCAGCAAGCGACTAGCATATATGGTGGCTAACTTATTCGCAAAAGAGAGCGAGAAGAGGAGGCAAGGC	TGCAGCAAGCGACTAGCATATATGGTGGCTATCCTATTCGCAAAAGAGAGCGAGAAGAGGAGGCAAAGC	69	719689837	ENA|MKGO01000007|MKGO01000007.1 Triticum urartu cultivar G1812 chromosome 7, whole genome shotgun sequence.
SNP_1155881	ENA|MKGO01000007|MKGO01000007.1	96.97	66	2	0	1	66	220950402	220950467	4.15e-23	111	ENA|MKGO01000007|MKGO01000007.1	60	64	64	0	96.97	1	1	TGCAGCAAGCGACTAGCATATATGGTGGCTAACTTATTCGCAAAAGAGAGCGAGAAGAGGAGGCAA	TGCAGCAAGCGAATAGCATATATGGTGGCTAACTTATTCGCAAAGGAGAGCGAGAAGAGGAGGCAA	69	719689837	ENA|MKGO01000007|MKGO01000007.1 Triticum urartu cultivar G1812 chromosome 7, whole genome shotgun sequence.
SNP_1155881	ENA|MKGO01000007|MKGO01000007.1	96.97	66	2	0	1	66	221085463	221085528	4.15e-23	111	ENA|MKGO01000007|MKGO01000007.1	60	64	64	0	96.97	1	1	TGCAGCAAGCGACTAGCATATATGGTGGCTAACTTATTCGCAAAAGAGAGCGAGAAGAGGAGGCAA	TGCAGCAAGCGACTAGCATATATGGTGGCTAACCTATTTGCAAAAGAGAGCGAGAAGAGGAGGCAA	69	719689837	ENA|MKGO01000007|MKGO01000007.1 Triticum urartu cultivar G1812 chromosome 7, whole genome shotgun sequence.
SNP_1155881	ENA|MKGO01000007|MKGO01000007.1	96.97	66	2	0	1	66	221247799	221247864	4.15e-23	111	ENA|MKGO01000007|MKGO01000007.1	60	64	64	0	96.97	1	1	TGCAGCAAGCGACTAGCATATATGGTGGCTAACTTATTCGCAAAAGAGAGCGAGAAGAGGAGGCAA	TGCAGCAAGCGACTAGCATATATGGTGGCTAACATATTCGCAAAAGAGAGCGAGAAGAGAAGGCAA	69	719689837	ENA|MKGO01000007|MKGO01000007.1 Triticum urartu cultivar G1812 chromosome 7, whole genome shotgun sequence.
SNP_1155881	ENA|MKGO01000007|MKGO01000007.1	96.97	66	2	0	1	66	221663299	221663364	4.15e-23	111	ENA|MKGO01000007|MKGO01000007.1	60	64	64	0	96.97	1	1	TGCAGCAAGCGACTAGCATATATGGTGGCTAACTTATTCGCAAAAGAGAGCGAGAAGAGGAGGCAA	TGCAGCAAGCGACTAGCATATATGGTGGCCAACTTATTCACAAAAGAGAGCGAGAAGAGGAGGCAA	69	719689837	ENA|MKGO01000007|MKGO01000007.1 Triticum urartu cultivar G1812 chromosome 7, whole genome shotgun sequence.
SNP_1155881	ENA|MKGO01000007|MKGO01000007.1	96.97	66	2	0	1	66	226258280	226258345	4.15e-23	111	ENA|MKGO01000007|MKGO01000007.1	60	64	64	0	96.97	1	1	TGCAGCAAGCGACTAGCATATATGGTGGCTAACTTATTCGCAAAAGAGAGCGAGAAGAGGAGGCAA	TGCAGCAAGCGACTAGCATATATGGTGGCTATCTTATACGCAAAAGAGAGCGAGAAGAGGAGGCAA	69	719689837	ENA|MKGO01000007|MKGO01000007.1 Triticum urartu cultivar G1812 chromosome 7, whole genome shotgun sequence.
SNP_1155881	ENA|MKGO01000007|MKGO01000007.1	95.652	69	3	0	1	69	229338471	229338539	4.15e-23	111	ENA|MKGO01000007|MKGO01000007.1	60	66	66	0	95.65	1	1	TGCAGCAAGCGACTAGCATATATGGTGGCTAACTTATTCGCAAAAGAGAGCGAGAAGAGGAGGCAAGGC	TGCAGCTAGCGGCTAGCATATATGGTGGCTAACTTATTCGTAAAAGAGAGCGAGAAGAGGAGGCAAGGC	69	719689837	ENA|MKGO01000007|MKGO01000007.1 Triticum urartu cultivar G1812 chromosome 7, whole genome shotgun sequence.
SNP_1155881	ENA|MKGO01000007|MKGO01000007.1	96.97	66	2	0	1	66	229859005	229859070	4.15e-23	111	ENA|MKGO01000007|MKGO01000007.1	60	64	64	0	96.97	1	1	TGCAGCAAGCGACTAGCATATATGGTGGCTAACTTATTCGCAAAAGAGAGCGAGAAGAGGAGGCAA	TGCAGCAAGCGACTAGCATATGTGGTGGCTAACTTATCCGCAAAAGAGAGCGAGAAGAGGAGGCAA	69	719689837	ENA|MKGO01000007|MKGO01000007.1 Triticum urartu cultivar G1812 chromosome 7, whole genome shotgun sequence.
SNP_1155881	ENA|MKGO01000007|MKGO01000007.1	96.97	66	2	0	1	66	229868895	229868960	4.15e-23	111	ENA|MKGO01000007|MKGO01000007.1	60	64	64	0	96.97	1	1	TGCAGCAAGCGACTAGCATATATGGTGGCTAACTTATTCGCAAAAGAGAGCGAGAAGAGGAGGCAA	TGCAGCAAGCGACTAGCATATGTGGTGGCTAACTTATCCGCAAAAGAGAGCGAGAAGAGGAGGCAA	69	719689837	ENA|MKGO01000007|MKGO01000007.1 Triticum urartu cultivar G1812 chromosome 7, whole genome shotgun sequence.
SNP_1155881	ENA|MKGO01000007|MKGO01000007.1	96.97	66	2	0	1	66	229891945	229892010	4.15e-23	111	ENA|MKGO01000007|MKGO01000007.1	60	64	64	0	96.97	1	1	TGCAGCAAGCGACTAGCATATATGGTGGCTAACTTATTCGCAAAAGAGAGCGAGAAGAGGAGGCAA	TGCAGCAAGCGACTAGCAAATATGGTGGCTAACTTATTCGCAAAAGAGAGCGAGAAGAGAAGGCAA	69	719689837	ENA|MKGO01000007|MKGO01000007.1 Triticum urartu cultivar G1812 chromosome 7, whole genome shotgun sequence.
SNP_1155881	ENA|MKGO01000007|MKGO01000007.1	96.97	66	2	0	1	66	232170257	232170192	4.15e-23	111	ENA|MKGO01000007|MKGO01000007.1	60	64	64	0	96.97	1	-1	TGCAGCAAGCGACTAGCATATATGGTGGCTAACTTATTCGCAAAAGAGAGCGAGAAGAGGAGGCAA	TGCAGCAAGCGACTAGCATATATGGTGGCTAACCTATTCGCAAAAGAGAGCGAGAAGAGAAGGCAA	69	719689837	ENA|MKGO01000007|MKGO01000007.1 Triticum urartu cultivar G1812 chromosome 7, whole genome shotgun sequence.
SNP_1155881	ENA|MKGO01000007|MKGO01000007.1	95.652	69	3	0	1	69	232745072	232745004	4.15e-23	111	ENA|MKGO01000007|MKGO01000007.1	60	66	66	0	95.65	1	-1	TGCAGCAAGCGACTAGCATATATGGTGGCTAACTTATTCGCAAAAGAGAGCGAGAAGAGGAGGCAAGGC	TGCAGCAAGCGACTAGCAAGTATGGTGGCTAACTTATTCGCAAAAGAGAGCGAGAAGAGGAGGCAAAGC	69	719689837	ENA|MKGO01000007|MKGO01000007.1 Triticum urartu cultivar G1812 chromosome 7, whole genome shotgun sequence.
SNP_1155881	ENA|MKGO01000007|MKGO01000007.1	96.97	66	2	0	1	66	240965704	240965769	4.15e-23	111	ENA|MKGO01000007|MKGO01000007.1	60	64	64	0	96.97	1	1	TGCAGCAAGCGACTAGCATATATGGTGGCTAACTTATTCGCAAAAGAGAGCGAGAAGAGGAGGCAA	TGCAGCAAGCGACTAGCAAGTATGGTGGCTAACTTATTCGCAAAAGAGAGCGAGAAGAGGAGGCAA	69	719689837	ENA|MKGO01000007|MKGO01000007.1 Triticum urartu cultivar G1812 chromosome 7, whole genome shotgun sequence.
SNP_1155881	ENA|MKGO01000007|MKGO01000007.1	96.97	66	2	0	1	66	240975321	240975386	4.15e-23	111	ENA|MKGO01000007|MKGO01000007.1	60	64	64	0	96.97	1	1	TGCAGCAAGCGACTAGCATATATGGTGGCTAACTTATTCGCAAAAGAGAGCGAGAAGAGGAGGCAA	TGCAGCAAGCGACTAGCAAGTATGGTGGCTAACTTATTCGCAAAAGAGAGCGAGAAGAGGAGGCAA	69	719689837	ENA|MKGO01000007|MKGO01000007.1 Triticum urartu cultivar G1812 chromosome 7, whole genome shotgun sequence.
SNP_1155881	ENA|MKGO01000007|MKGO01000007.1	96.97	66	2	0	1	66	244989403	244989468	4.15e-23	111	ENA|MKGO01000007|MKGO01000007.1	60	64	64	0	96.97	1	1	TGCAGCAAGCGACTAGCATATATGGTGGCTAACTTATTCGCAAAAGAGAGCGAGAAGAGGAGGCAA	TGCAGCAAGCGACTAGCATATATGGTGGCTAACATATTCGCAAAAGAGAGCGAGAAGAGAAGGCAA	69	719689837	ENA|MKGO01000007|MKGO01000007.1 Triticum urartu cultivar G1812 chromosome 7, whole genome shotgun sequence.
SNP_1155881	ENA|MKGO01000007|MKGO01000007.1	95.714	70	2	1	1	69	249671303	249671234	4.15e-23	111	ENA|MKGO01000007|MKGO01000007.1	60	67	67	1	95.71	1	-1	TGCAGCAAGCGACTAGCATATATGGTGGCTAACTTATTCGCAAAAGAGAGCGAGAAGAGGAGGCAA-GGC	TGCAGCAAGCGACTAGCATATATGGTGGCTAACCTATTCGCAAAAGAGAGCGAGAAGAGAAGGCAAAGGC	69	719689837	ENA|MKGO01000007|MKGO01000007.1 Triticum urartu cultivar G1812 chromosome 7, whole genome shotgun sequence.
SNP_1155881	ENA|MKGO01000007|MKGO01000007.1	95.714	70	2	1	1	69	249691061	249690992	4.15e-23	111	ENA|MKGO01000007|MKGO01000007.1	60	67	67	1	95.71	1	-1	TGCAGCAAGCGACTAGCATATATGGTGGCTAACTTATTCGCAAAAGAGAGCGAGAAGAGGAGGCAA-GGC	TGCAGCAAGCGACTAGCATATATGGTGGCTAACCTATTCGCAAAAGAGAGCGAGAAGAGAAGGCAAAGGC	69	719689837	ENA|MKGO01000007|MKGO01000007.1 Triticum urartu cultivar G1812 chromosome 7, whole genome shotgun sequence.
SNP_1155881	ENA|MKGO01000007|MKGO01000007.1	96.97	66	2	0	1	66	253133999	253134064	4.15e-23	111	ENA|MKGO01000007|MKGO01000007.1	60	64	64	0	96.97	1	1	TGCAGCAAGCGACTAGCATATATGGTGGCTAACTTATTCGCAAAAGAGAGCGAGAAGAGGAGGCAA	TGCAGCAAGCGACTAGCATATATGGTGGCTAACCTATTCGCAAAAGAGAGCGAGAAGAGAAGGCAA	69	719689837	ENA|MKGO01000007|MKGO01000007.1 Triticum urartu cultivar G1812 chromosome 7, whole genome shotgun sequence.
SNP_1155881	ENA|MKGO01000007|MKGO01000007.1	95.652	69	3	0	1	69	253312334	253312266	4.15e-23	111	ENA|MKGO01000007|MKGO01000007.1	60	66	66	0	95.65	1	-1	TGCAGCAAGCGACTAGCATATATGGTGGCTAACTTATTCGCAAAAGAGAGCGAGAAGAGGAGGCAAGGC	TGCAGCAAGCGACTAGCATTTATGGTGGCTAACCTATTCGCAAAAGAGAGCGAGAAGAGGAGGCAAAGC	69	719689837	ENA|MKGO01000007|MKGO01000007.1 Triticum urartu cultivar G1812 chromosome 7, whole genome shotgun sequence.
SNP_1155881	ENA|MKGO01000007|MKGO01000007.1	95.652	69	3	0	1	69	254210431	254210363	4.15e-23	111	ENA|MKGO01000007|MKGO01000007.1	60	66	66	0	95.65	1	-1	TGCAGCAAGCGACTAGCATATATGGTGGCTAACTTATTCGCAAAAGAGAGCGAGAAGAGGAGGCAAGGC	TGCAGCAAGCGACTAGCATATATGGTGGCTAACTTATTCGCAAAAGAGAGTGAGAAGACGAGGCAATGC	69	719689837	ENA|MKGO01000007|MKGO01000007.1 Triticum urartu cultivar G1812 chromosome 7, whole genome shotgun sequence.
SNP_1155881	ENA|MKGO01000007|MKGO01000007.1	96.97	66	2	0	1	66	258817505	258817570	4.15e-23	111	ENA|MKGO01000007|MKGO01000007.1	60	64	64	0	96.97	1	1	TGCAGCAAGCGACTAGCATATATGGTGGCTAACTTATTCGCAAAAGAGAGCGAGAAGAGGAGGCAA	TGCAGCAAGCGACTAGCATATATGGTGGCTAACCTGTTCGCAAAAGAGAGCGAGAAGAGGAGGCAA	69	719689837	ENA|MKGO01000007|MKGO01000007.1 Triticum urartu cultivar G1812 chromosome 7, whole genome shotgun sequence.
SNP_1155881	ENA|MKGO01000007|MKGO01000007.1	96.97	66	2	0	1	66	258827109	258827174	4.15e-23	111	ENA|MKGO01000007|MKGO01000007.1	60	64	64	0	96.97	1	1	TGCAGCAAGCGACTAGCATATATGGTGGCTAACTTATTCGCAAAAGAGAGCGAGAAGAGGAGGCAA	TGCAGCAAGCGACTAGCATATATGGTGGCTAACCTGTTCGCAAAAGAGAGCGAGAAGAGGAGGCAA	69	719689837	ENA|MKGO01000007|MKGO01000007.1 Triticum urartu cultivar G1812 chromosome 7, whole genome shotgun sequence.
SNP_1155881	ENA|MKGO01000007|MKGO01000007.1	95.652	69	3	0	1	69	259736470	259736538	4.15e-23	111	ENA|MKGO01000007|MKGO01000007.1	60	66	66	0	95.65	1	1	TGCAGCAAGCGACTAGCATATATGGTGGCTAACTTATTCGCAAAAGAGAGCGAGAAGAGGAGGCAAGGC	TGCAGCAAGCGACTAGCATATATGGTGGCTAAGCTGTTCGCAAAAGAGAGCGAGAAGAGGAGGCAAGGC	69	719689837	ENA|MKGO01000007|MKGO01000007.1 Triticum urartu cultivar G1812 chromosome 7, whole genome shotgun sequence.
SNP_1155881	ENA|MKGO01000007|MKGO01000007.1	96.97	66	2	0	1	66	259955073	259955138	4.15e-23	111	ENA|MKGO01000007|MKGO01000007.1	60	64	64	0	96.97	1	1	TGCAGCAAGCGACTAGCATATATGGTGGCTAACTTATTCGCAAAAGAGAGCGAGAAGAGGAGGCAA	TGCAGCAAGCGACTAGCATATATGGTGGCTAACCTGTTCGCAAAAGAGAGCGAGAAGAGGAGGCAA	69	719689837	ENA|MKGO01000007|MKGO01000007.1 Triticum urartu cultivar G1812 chromosome 7, whole genome shotgun sequence.
SNP_1155881	ENA|MKGO01000007|MKGO01000007.1	96.97	66	2	0	1	66	259964677	259964742	4.15e-23	111	ENA|MKGO01000007|MKGO01000007.1	60	64	64	0	96.97	1	1	TGCAGCAAGCGACTAGCATATATGGTGGCTAACTTATTCGCAAAAGAGAGCGAGAAGAGGAGGCAA	TGCAGCAAGCGACTAGCATATATGGTGGCTAACCTGTTCGCAAAAGAGAGCGAGAAGAGGAGGCAA	69	719689837	ENA|MKGO01000007|MKGO01000007.1 Triticum urartu cultivar G1812 chromosome 7, whole genome shotgun sequence.
SNP_1155881	ENA|MKGO01000007|MKGO01000007.1	96.97	66	2	0	1	66	262852384	262852449	4.15e-23	111	ENA|MKGO01000007|MKGO01000007.1	60	64	64	0	96.97	1	1	TGCAGCAAGCGACTAGCATATATGGTGGCTAACTTATTCGCAAAAGAGAGCGAGAAGAGGAGGCAA	TGCAGCAAGCGACTAGCATATATGGTGGCTAACATATTCGCAAAAGAGAGCGAGAAGAGAAGGCAA	69	719689837	ENA|MKGO01000007|MKGO01000007.1 Triticum urartu cultivar G1812 chromosome 7, whole genome shotgun sequence.
SNP_1155881	ENA|MKGO01000007|MKGO01000007.1	96.97	66	2	0	1	66	265270734	265270799	4.15e-23	111	ENA|MKGO01000007|MKGO01000007.1	60	64	64	0	96.97	1	1	TGCAGCAAGCGACTAGCATATATGGTGGCTAACTTATTCGCAAAAGAGAGCGAGAAGAGGAGGCAA	TGCAGCAAGCGACTAGCATATATGGTGGCTAACCTGTTCGCAAAAGAGAGCGAGAAGAGGAGGCAA	69	719689837	ENA|MKGO01000007|MKGO01000007.1 Triticum urartu cultivar G1812 chromosome 7, whole genome shotgun sequence.
SNP_1155881	ENA|MKGO01000007|MKGO01000007.1	95.652	69	3	0	1	69	265962583	265962515	4.15e-23	111	ENA|MKGO01000007|MKGO01000007.1	60	66	66	0	95.65	1	-1	TGCAGCAAGCGACTAGCATATATGGTGGCTAACTTATTCGCAAAAGAGAGCGAGAAGAGGAGGCAAGGC	TGCAGCAAGCGACTAGCAAGTATGGTGGCTAACTTATTCGCAAAAGAGAGCGAGAAGAGGAGGCAAAGC	69	719689837	ENA|MKGO01000007|MKGO01000007.1 Triticum urartu cultivar G1812 chromosome 7, whole genome shotgun sequence.
SNP_1155881	ENA|MKGO01000007|MKGO01000007.1	96.97	66	2	0	4	69	266466681	266466616	4.15e-23	111	ENA|MKGO01000007|MKGO01000007.1	60	64	64	0	96.97	1	-1	AGCAAGCGACTAGCATATATGGTGGCTAACTTATTCGCAAAAGAGAGCGAGAAGAGGAGGCAAGGC	AGCAAGCGACTAGCAAATATGGTGGCTAACTTATTCGCAAAAGAGAGCGAGAAGAGGAGGCAAAGC	69	719689837	ENA|MKGO01000007|MKGO01000007.1 Triticum urartu cultivar G1812 chromosome 7, whole genome shotgun sequence.
SNP_1155881	ENA|MKGO01000007|MKGO01000007.1	96.97	66	2	0	1	66	266797223	266797288	4.15e-23	111	ENA|MKGO01000007|MKGO01000007.1	60	64	64	0	96.97	1	1	TGCAGCAAGCGACTAGCATATATGGTGGCTAACTTATTCGCAAAAGAGAGCGAGAAGAGGAGGCAA	TGCAGCAAGCGACTAGAATATATGGTGGCTAACCTATTCGCAAAAGAGAGCGAGAAGAGGAGGCAA	69	719689837	ENA|MKGO01000007|MKGO01000007.1 Triticum urartu cultivar G1812 chromosome 7, whole genome shotgun sequence.
SNP_1155881	ENA|MKGO01000007|MKGO01000007.1	95.652	69	3	0	1	69	267038983	267038915	4.15e-23	111	ENA|MKGO01000007|MKGO01000007.1	60	66	66	0	95.65	1	-1	TGCAGCAAGCGACTAGCATATATGGTGGCTAACTTATTCGCAAAAGAGAGCGAGAAGAGGAGGCAAGGC	TGCAGCAAGCGACTAGCATATATGGTGGCTAGCCTATTCGCAAAAGAGAGCGAGAAGAGGAGGCAAAGC	69	719689837	ENA|MKGO01000007|MKGO01000007.1 Triticum urartu cultivar G1812 chromosome 7, whole genome shotgun sequence.
SNP_1155881	ENA|MKGO01000007|MKGO01000007.1	95.652	69	3	0	1	69	267055651	267055583	4.15e-23	111	ENA|MKGO01000007|MKGO01000007.1	60	66	66	0	95.65	1	-1	TGCAGCAAGCGACTAGCATATATGGTGGCTAACTTATTCGCAAAAGAGAGCGAGAAGAGGAGGCAAGGC	TGCAGCAAGCGACTAGAATATATGGTGGCTAACCTATTCGCAAAAGAGAGCGAGAAGAGGAGGCAAAGC	69	719689837	ENA|MKGO01000007|MKGO01000007.1 Triticum urartu cultivar G1812 chromosome 7, whole genome shotgun sequence.
SNP_1155881	ENA|MKGO01000007|MKGO01000007.1	96.97	66	2	0	1	66	268230771	268230836	4.15e-23	111	ENA|MKGO01000007|MKGO01000007.1	60	64	64	0	96.97	1	1	TGCAGCAAGCGACTAGCATATATGGTGGCTAACTTATTCGCAAAAGAGAGCGAGAAGAGGAGGCAA	TGCAGCAAGCGACTAGCATATATGGTGGCTAACCTATTCGCAAAAGAGAGCGAGAAGAGAAGGCAA	69	719689837	ENA|MKGO01000007|MKGO01000007.1 Triticum urartu cultivar G1812 chromosome 7, whole genome shotgun sequence.
SNP_1155881	ENA|MKGO01000007|MKGO01000007.1	96.97	66	2	0	1	66	269154033	269154098	4.15e-23	111	ENA|MKGO01000007|MKGO01000007.1	60	64	64	0	96.97	1	1	TGCAGCAAGCGACTAGCATATATGGTGGCTAACTTATTCGCAAAAGAGAGCGAGAAGAGGAGGCAA	TGCAACAAGCGACTAGCAAATATGGTGGCTAACTTATTCGCAAAAGAGAGCGAGAAGAGGAGGCAA	69	719689837	ENA|MKGO01000007|MKGO01000007.1 Triticum urartu cultivar G1812 chromosome 7, whole genome shotgun sequence.
SNP_1155881	ENA|MKGO01000007|MKGO01000007.1	96.97	66	2	0	1	66	269490859	269490924	4.15e-23	111	ENA|MKGO01000007|MKGO01000007.1	60	64	64	0	96.97	1	1	TGCAGCAAGCGACTAGCATATATGGTGGCTAACTTATTCGCAAAAGAGAGCGAGAAGAGGAGGCAA	TGCAGCAAGCGACTAGCAAGTATGGTGGCTAACTTATTCGCAAAAGAGAGCGAGAAGAGGAGGCAA	69	719689837	ENA|MKGO01000007|MKGO01000007.1 Triticum urartu cultivar G1812 chromosome 7, whole genome shotgun sequence.
SNP_1155881	ENA|MKGO01000007|MKGO01000007.1	96.97	66	2	0	1	66	269500495	269500560	4.15e-23	111	ENA|MKGO01000007|MKGO01000007.1	60	64	64	0	96.97	1	1	TGCAGCAAGCGACTAGCATATATGGTGGCTAACTTATTCGCAAAAGAGAGCGAGAAGAGGAGGCAA	TGCAGCAAGCGACTAGCAAGTATGGTGGCTAACTTATTCGCAAAAGAGAGCGAGAAGAGGAGGCAA	69	719689837	ENA|MKGO01000007|MKGO01000007.1 Triticum urartu cultivar G1812 chromosome 7, whole genome shotgun sequence.
SNP_1155881	ENA|MKGO01000007|MKGO01000007.1	96.97	66	2	0	1	66	271043116	271043181	4.15e-23	111	ENA|MKGO01000007|MKGO01000007.1	60	64	64	0	96.97	1	1	TGCAGCAAGCGACTAGCATATATGGTGGCTAACTTATTCGCAAAAGAGAGCGAGAAGAGGAGGCAA	TGCAGCAAGCGACTAGCAAGTATGGTGGCTAACTTATTCGCAAAAGAGAGCGAGAAGAGGAGGCAA	69	719689837	ENA|MKGO01000007|MKGO01000007.1 Triticum urartu cultivar G1812 chromosome 7, whole genome shotgun sequence.
SNP_1155881	ENA|MKGO01000007|MKGO01000007.1	96.97	66	2	0	1	66	271043746	271043811	4.15e-23	111	ENA|MKGO01000007|MKGO01000007.1	60	64	64	0	96.97	1	1	TGCAGCAAGCGACTAGCATATATGGTGGCTAACTTATTCGCAAAAGAGAGCGAGAAGAGGAGGCAA	TGCAGCAAGCGACTAGCAAGTATGGTGGCTAACTTATTCGCAAAAGAGAGCGAGAAGAGGAGGCAA	69	719689837	ENA|MKGO01000007|MKGO01000007.1 Triticum urartu cultivar G1812 chromosome 7, whole genome shotgun sequence.
SNP_1155881	ENA|MKGO01000007|MKGO01000007.1	96.97	66	2	0	1	66	271083184	271083249	4.15e-23	111	ENA|MKGO01000007|MKGO01000007.1	60	64	64	0	96.97	1	1	TGCAGCAAGCGACTAGCATATATGGTGGCTAACTTATTCGCAAAAGAGAGCGAGAAGAGGAGGCAA	TGCAGCAAGCGACTAGCAAGTATGGTGGCTAACTTATTCGCAAAAGAGAGCGAGAAGAGGAGGCAA	69	719689837	ENA|MKGO01000007|MKGO01000007.1 Triticum urartu cultivar G1812 chromosome 7, whole genome shotgun sequence.
SNP_1155881	ENA|MKGO01000007|MKGO01000007.1	96.97	66	2	0	1	66	271092218	271092283	4.15e-23	111	ENA|MKGO01000007|MKGO01000007.1	60	64	64	0	96.97	1	1	TGCAGCAAGCGACTAGCATATATGGTGGCTAACTTATTCGCAAAAGAGAGCGAGAAGAGGAGGCAA	TGCAGCAAGCGACTAGCAAGTATGGTGGCTAACTTATTCGCAAAAGAGAGCGAGAAGAGGAGGCAA	69	719689837	ENA|MKGO01000007|MKGO01000007.1 Triticum urartu cultivar G1812 chromosome 7, whole genome shotgun sequence.
SNP_1155881	ENA|MKGO01000007|MKGO01000007.1	96.97	66	2	0	1	66	271417598	271417663	4.15e-23	111	ENA|MKGO01000007|MKGO01000007.1	60	64	64	0	96.97	1	1	TGCAGCAAGCGACTAGCATATATGGTGGCTAACTTATTCGCAAAAGAGAGCGAGAAGAGGAGGCAA	TGCAGCAAGCGACTAGCATATATGGTGGCTATCTTATTCGCAAAAGAGAGCGAGAAGAGGAAGCAA	69	719689837	ENA|MKGO01000007|MKGO01000007.1 Triticum urartu cultivar G1812 chromosome 7, whole genome shotgun sequence.
SNP_1155881	ENA|MKGO01000007|MKGO01000007.1	95.652	69	3	0	1	69	271442038	271441970	4.15e-23	111	ENA|MKGO01000007|MKGO01000007.1	60	66	66	0	95.65	1	-1	TGCAGCAAGCGACTAGCATATATGGTGGCTAACTTATTCGCAAAAGAGAGCGAGAAGAGGAGGCAAGGC	TGCAGCAAGCGACTAGCATATATGGTGGCTATCTTATTCGCAAAAGAGAGCGAGAAGAGGAAGCAAAGC	69	719689837	ENA|MKGO01000007|MKGO01000007.1 Triticum urartu cultivar G1812 chromosome 7, whole genome shotgun sequence.
SNP_1155881	ENA|MKGO01000007|MKGO01000007.1	96.97	66	2	0	1	66	271658707	271658772	4.15e-23	111	ENA|MKGO01000007|MKGO01000007.1	60	64	64	0	96.97	1	1	TGCAGCAAGCGACTAGCATATATGGTGGCTAACTTATTCGCAAAAGAGAGCGAGAAGAGGAGGCAA	TGCAGCAAGCGACTAGCATATATGGTGGCTATCTTATTCGCAAAAGAGAGCGAGAAGAGGAAGCAA	69	719689837	ENA|MKGO01000007|MKGO01000007.1 Triticum urartu cultivar G1812 chromosome 7, whole genome shotgun sequence.
SNP_1155881	ENA|MKGO01000007|MKGO01000007.1	96.97	66	2	0	1	66	271668224	271668289	4.15e-23	111	ENA|MKGO01000007|MKGO01000007.1	60	64	64	0	96.97	1	1	TGCAGCAAGCGACTAGCATATATGGTGGCTAACTTATTCGCAAAAGAGAGCGAGAAGAGGAGGCAA	TGCAGCAAGCGACTAGCATATATGGTGGCTATCTTATTCGCAAAAGAGAGCGAGAAGAGGAAGCAA	69	719689837	ENA|MKGO01000007|MKGO01000007.1 Triticum urartu cultivar G1812 chromosome 7, whole genome shotgun sequence.
SNP_1155881	ENA|MKGO01000007|MKGO01000007.1	95.652	69	3	0	1	69	272733500	272733432	4.15e-23	111	ENA|MKGO01000007|MKGO01000007.1	60	66	66	0	95.65	1	-1	TGCAGCAAGCGACTAGCATATATGGTGGCTAACTTATTCGCAAAAGAGAGCGAGAAGAGGAGGCAAGGC	TGCAGCAAGCGACTAGCATATGTGGTGGCTAACTTATACGCAAAAGAGAGCGAGAAGAGGAGGCAAAGC	69	719689837	ENA|MKGO01000007|MKGO01000007.1 Triticum urartu cultivar G1812 chromosome 7, whole genome shotgun sequence.
SNP_1155881	ENA|MKGO01000007|MKGO01000007.1	95.652	69	3	0	1	69	272743107	272743039	4.15e-23	111	ENA|MKGO01000007|MKGO01000007.1	60	66	66	0	95.65	1	-1	TGCAGCAAGCGACTAGCATATATGGTGGCTAACTTATTCGCAAAAGAGAGCGAGAAGAGGAGGCAAGGC	TGCAGCAAGCGACTAGCATATCTGGTGGCTAACTTATACGCAAAAGAGAGCGAGAAGAGGAGGCAAAGC	69	719689837	ENA|MKGO01000007|MKGO01000007.1 Triticum urartu cultivar G1812 chromosome 7, whole genome shotgun sequence.
SNP_1155881	ENA|MKGO01000007|MKGO01000007.1	95.652	69	3	0	1	69	272792943	272792875	4.15e-23	111	ENA|MKGO01000007|MKGO01000007.1	60	66	66	0	95.65	1	-1	TGCAGCAAGCGACTAGCATATATGGTGGCTAACTTATTCGCAAAAGAGAGCGAGAAGAGGAGGCAAGGC	TGCAGCAAGCGACTAGCAAGTATGGTGGCTAACTTATTCGCAAAAGAGAGCGAGAAGAGGAGGCAAAGC	69	719689837	ENA|MKGO01000007|MKGO01000007.1 Triticum urartu cultivar G1812 chromosome 7, whole genome shotgun sequence.
SNP_1155881	ENA|MKGO01000007|MKGO01000007.1	95.652	69	3	0	1	69	272868264	272868196	4.15e-23	111	ENA|MKGO01000007|MKGO01000007.1	60	66	66	0	95.65	1	-1	TGCAGCAAGCGACTAGCATATATGGTGGCTAACTTATTCGCAAAAGAGAGCGAGAAGAGGAGGCAAGGC	TGCAGCAAGCGACTAGCATATGTGGTGGCTAACTTATACGCAAAAGAGAGCGAGAAGAGGAGGCAAAGC	69	719689837	ENA|MKGO01000007|MKGO01000007.1 Triticum urartu cultivar G1812 chromosome 7, whole genome shotgun sequence.
SNP_1155881	ENA|MKGO01000007|MKGO01000007.1	95.652	69	3	0	1	69	272874387	272874319	4.15e-23	111	ENA|MKGO01000007|MKGO01000007.1	60	66	66	0	95.65	1	-1	TGCAGCAAGCGACTAGCATATATGGTGGCTAACTTATTCGCAAAAGAGAGCGAGAAGAGGAGGCAAGGC	TGCAGCAAGCGACTAGCATATGTGGTGGCTAACTTATACGCAAAAGAGAGCGAGAAGAGGAGGCAAAGC	69	719689837	ENA|MKGO01000007|MKGO01000007.1 Triticum urartu cultivar G1812 chromosome 7, whole genome shotgun sequence.
SNP_1155881	ENA|MKGO01000007|MKGO01000007.1	95.652	69	3	0	1	69	274116376	274116308	4.15e-23	111	ENA|MKGO01000007|MKGO01000007.1	60	66	66	0	95.65	1	-1	TGCAGCAAGCGACTAGCATATATGGTGGCTAACTTATTCGCAAAAGAGAGCGAGAAGAGGAGGCAAGGC	TGCAGCAAGCGACTAGCAAGTATGGTGGCTAACTTATTCGCAAAAGAGAGCGAGAAGAGGAGGCAAAGC	69	719689837	ENA|MKGO01000007|MKGO01000007.1 Triticum urartu cultivar G1812 chromosome 7, whole genome shotgun sequence.
SNP_1155881	ENA|MKGO01000007|MKGO01000007.1	95.652	69	3	0	1	69	274361428	274361360	4.15e-23	111	ENA|MKGO01000007|MKGO01000007.1	60	66	66	0	95.65	1	-1	TGCAGCAAGCGACTAGCATATATGGTGGCTAACTTATTCGCAAAAGAGAGCGAGAAGAGGAGGCAAGGC	TGCAGCAAGCGACTAGCATATACGGTGGCTATCTTATTCGCAAAAGAGAGCGAGAAGAGGAGGCAAAGC	69	719689837	ENA|MKGO01000007|MKGO01000007.1 Triticum urartu cultivar G1812 chromosome 7, whole genome shotgun sequence.
SNP_1155881	ENA|MKGO01000007|MKGO01000007.1	95.652	69	3	0	1	69	275080113	275080045	4.15e-23	111	ENA|MKGO01000007|MKGO01000007.1	60	66	66	0	95.65	1	-1	TGCAGCAAGCGACTAGCATATATGGTGGCTAACTTATTCGCAAAAGAGAGCGAGAAGAGGAGGCAAGGC	TGCAGCAAGCGACTAGCAAATATGGTGGCTAACTTGTTCGCAAAAGAGAGCGAGAAGAGGAGGCAAAGC	69	719689837	ENA|MKGO01000007|MKGO01000007.1 Triticum urartu cultivar G1812 chromosome 7, whole genome shotgun sequence.
SNP_1155881	ENA|MKGO01000007|MKGO01000007.1	95.652	69	3	0	1	69	275335724	275335656	4.15e-23	111	ENA|MKGO01000007|MKGO01000007.1	60	66	66	0	95.65	1	-1	TGCAGCAAGCGACTAGCATATATGGTGGCTAACTTATTCGCAAAAGAGAGCGAGAAGAGGAGGCAAGGC	TGCATCAAGCGACTAGCATATGTGGTGGCTAACTTATACGCAAAAGAGAGCGAGAAGAGGAGGCAAGGC	69	719689837	ENA|MKGO01000007|MKGO01000007.1 Triticum urartu cultivar G1812 chromosome 7, whole genome shotgun sequence.
SNP_1155881	ENA|MKGO01000007|MKGO01000007.1	95.652	69	3	0	1	69	275420840	275420772	4.15e-23	111	ENA|MKGO01000007|MKGO01000007.1	60	66	66	0	95.65	1	-1	TGCAGCAAGCGACTAGCATATATGGTGGCTAACTTATTCGCAAAAGAGAGCGAGAAGAGGAGGCAAGGC	TGCAGCAAGCGACTAGCAAGTATGGTGGCTAACTTATTCGCAAAAGAGAGCGAGAAGAGGAGGCAAAGC	69	719689837	ENA|MKGO01000007|MKGO01000007.1 Triticum urartu cultivar G1812 chromosome 7, whole genome shotgun sequence.
SNP_1155881	ENA|MKGO01000007|MKGO01000007.1	96.97	66	2	0	1	66	278084911	278084976	4.15e-23	111	ENA|MKGO01000007|MKGO01000007.1	60	64	64	0	96.97	1	1	TGCAGCAAGCGACTAGCATATATGGTGGCTAACTTATTCGCAAAAGAGAGCGAGAAGAGGAGGCAA	TGCAGCAAGCGACTAGCAAGTATGGTGGCTAACTTATTCGCAAAAGAGAGCGAGAAGAGGAGGCAA	69	719689837	ENA|MKGO01000007|MKGO01000007.1 Triticum urartu cultivar G1812 chromosome 7, whole genome shotgun sequence.
SNP_1155881	ENA|MKGO01000007|MKGO01000007.1	96.97	66	2	0	1	66	282570147	282570212	4.15e-23	111	ENA|MKGO01000007|MKGO01000007.1	60	64	64	0	96.97	1	1	TGCAGCAAGCGACTAGCATATATGGTGGCTAACTTATTCGCAAAAGAGAGCGAGAAGAGGAGGCAA	TGCAGCAAGCGACTAGCAAGTATGGTGGCTAACTTATTCGCAAAAGAGAGCGAGAAGAGGAGGCAA	69	719689837	ENA|MKGO01000007|MKGO01000007.1 Triticum urartu cultivar G1812 chromosome 7, whole genome shotgun sequence.
SNP_1155881	ENA|MKGO01000007|MKGO01000007.1	95.652	69	3	0	1	69	282968151	282968083	4.15e-23	111	ENA|MKGO01000007|MKGO01000007.1	60	66	66	0	95.65	1	-1	TGCAGCAAGCGACTAGCATATATGGTGGCTAACTTATTCGCAAAAGAGAGCGAGAAGAGGAGGCAAGGC	TGCAGCAAGCAACTAGCAAATATGGTGGCTAACTTATTCGCAAAAGAGAGCGAGAAGAGGAGGCAAAGC	69	719689837	ENA|MKGO01000007|MKGO01000007.1 Triticum urartu cultivar G1812 chromosome 7, whole genome shotgun sequence.
SNP_1155881	ENA|MKGO01000007|MKGO01000007.1	95.652	69	3	0	1	69	286418426	286418358	4.15e-23	111	ENA|MKGO01000007|MKGO01000007.1	60	66	66	0	95.65	1	-1	TGCAGCAAGCGACTAGCATATATGGTGGCTAACTTATTCGCAAAAGAGAGCGAGAAGAGGAGGCAAGGC	TGCAGCAAGCGACTAGCATATATGGTGGCTAACTTATACACAAAAGAGAGCGAGAAGAGGAGGCAAAGC	69	719689837	ENA|MKGO01000007|MKGO01000007.1 Triticum urartu cultivar G1812 chromosome 7, whole genome shotgun sequence.
SNP_1155881	ENA|MKGO01000007|MKGO01000007.1	95.652	69	3	0	1	69	286459680	286459612	4.15e-23	111	ENA|MKGO01000007|MKGO01000007.1	60	66	66	0	95.65	1	-1	TGCAGCAAGCGACTAGCATATATGGTGGCTAACTTATTCGCAAAAGAGAGCGAGAAGAGGAGGCAAGGC	TGCAGCAAGCGACTAGCATATATGGTGGCTAACTTATACGCAAAAGAGAGCGAGAGGAGGAGGCAAAGC	69	719689837	ENA|MKGO01000007|MKGO01000007.1 Triticum urartu cultivar G1812 chromosome 7, whole genome shotgun sequence.
SNP_1155881	ENA|MKGO01000007|MKGO01000007.1	95.652	69	3	0	1	69	288695563	288695495	4.15e-23	111	ENA|MKGO01000007|MKGO01000007.1	60	66	66	0	95.65	1	-1	TGCAGCAAGCGACTAGCATATATGGTGGCTAACTTATTCGCAAAAGAGAGCGAGAAGAGGAGGCAAGGC	TGCAGCAAGCGACTAGCAAGTATGGTGGCTAACTTATTTGCAAAAGAGAGCGAGAAGAGGAGGCAAGGC	69	719689837	ENA|MKGO01000007|MKGO01000007.1 Triticum urartu cultivar G1812 chromosome 7, whole genome shotgun sequence.
SNP_1155881	ENA|MKGO01000007|MKGO01000007.1	96.97	66	2	0	1	66	292617172	292617237	4.15e-23	111	ENA|MKGO01000007|MKGO01000007.1	60	64	64	0	96.97	1	1	TGCAGCAAGCGACTAGCATATATGGTGGCTAACTTATTCGCAAAAGAGAGCGAGAAGAGGAGGCAA	TGCAGCAAGCGACTAGCATATATGGTGGCTAACTTATACGCAAAAGAGAGCGAGAAGAGAAGGCAA	69	719689837	ENA|MKGO01000007|MKGO01000007.1 Triticum urartu cultivar G1812 chromosome 7, whole genome shotgun sequence.
SNP_1155881	ENA|MKGO01000007|MKGO01000007.1	96.97	66	2	0	1	66	292636509	292636574	4.15e-23	111	ENA|MKGO01000007|MKGO01000007.1	60	64	64	0	96.97	1	1	TGCAGCAAGCGACTAGCATATATGGTGGCTAACTTATTCGCAAAAGAGAGCGAGAAGAGGAGGCAA	TGCAGCAAGCGACTAGCATATATGGTGGCTAACTTATACGCAAAAGAGAGCGAGAAGAGAAGGCAA	69	719689837	ENA|MKGO01000007|MKGO01000007.1 Triticum urartu cultivar G1812 chromosome 7, whole genome shotgun sequence.
SNP_1155881	ENA|MKGO01000007|MKGO01000007.1	96.97	66	2	0	1	66	292712233	292712298	4.15e-23	111	ENA|MKGO01000007|MKGO01000007.1	60	64	64	0	96.97	1	1	TGCAGCAAGCGACTAGCATATATGGTGGCTAACTTATTCGCAAAAGAGAGCGAGAAGAGGAGGCAA	TGCAGCAAGCGACTAGCATATATGGTGGCTAACTTATACGCAAAAGAGAGCGAGAAGAGAAGGCAA	69	719689837	ENA|MKGO01000007|MKGO01000007.1 Triticum urartu cultivar G1812 chromosome 7, whole genome shotgun sequence.
SNP_1155881	ENA|MKGO01000007|MKGO01000007.1	96.97	66	2	0	1	66	292915932	292915997	4.15e-23	111	ENA|MKGO01000007|MKGO01000007.1	60	64	64	0	96.97	1	1	TGCAGCAAGCGACTAGCATATATGGTGGCTAACTTATTCGCAAAAGAGAGCGAGAAGAGGAGGCAA	TGCAGCAAGCGACTAGCATATATGGTGGCTAACCTGTTCGCAAAAGAGAGCGAGAAGAGGAGGCAA	69	719689837	ENA|MKGO01000007|MKGO01000007.1 Triticum urartu cultivar G1812 chromosome 7, whole genome shotgun sequence.
SNP_1155881	ENA|MKGO01000007|MKGO01000007.1	95.652	69	3	0	1	69	294366740	294366672	4.15e-23	111	ENA|MKGO01000007|MKGO01000007.1	60	66	66	0	95.65	1	-1	TGCAGCAAGCGACTAGCATATATGGTGGCTAACTTATTCGCAAAAGAGAGCGAGAAGAGGAGGCAAGGC	TGCAGCAAGCGACTAGCATATATGGTGGCTAACCTATTCGCAAAAGAGAGCGAGAAGAGAAGGCAAAGC	69	719689837	ENA|MKGO01000007|MKGO01000007.1 Triticum urartu cultivar G1812 chromosome 7, whole genome shotgun sequence.
SNP_1155881	ENA|MKGO01000007|MKGO01000007.1	96.97	66	2	0	1	66	295079635	295079700	4.15e-23	111	ENA|MKGO01000007|MKGO01000007.1	60	64	64	0	96.97	1	1	TGCAGCAAGCGACTAGCATATATGGTGGCTAACTTATTCGCAAAAGAGAGCGAGAAGAGGAGGCAA	TGCAGCAAGCGACCAGCATATATGGTGGCTAACATATTCGCAAAAGAGAGCGAGAAGAGGAGGCAA	69	719689837	ENA|MKGO01000007|MKGO01000007.1 Triticum urartu cultivar G1812 chromosome 7, whole genome shotgun sequence.
SNP_1155881	ENA|MKGO01000007|MKGO01000007.1	95.714	70	2	1	1	69	295422448	295422379	4.15e-23	111	ENA|MKGO01000007|MKGO01000007.1	60	67	67	1	95.71	1	-1	TGCAGCAAGCGACTAGCA-TATATGGTGGCTAACTTATTCGCAAAAGAGAGCGAGAAGAGGAGGCAAGGC	TGCAGCAAGCGACTAGCAAAATATGGTGGCTAACTTATTCGCAAAAGAGAGCGAGAAGAGGAGGCAAAGC	69	719689837	ENA|MKGO01000007|MKGO01000007.1 Triticum urartu cultivar G1812 chromosome 7, whole genome shotgun sequence.
SNP_1155881	ENA|MKGO01000007|MKGO01000007.1	96.97	66	2	0	1	66	296151822	296151887	4.15e-23	111	ENA|MKGO01000007|MKGO01000007.1	60	64	64	0	96.97	1	1	TGCAGCAAGCGACTAGCATATATGGTGGCTAACTTATTCGCAAAAGAGAGCGAGAAGAGGAGGCAA	TGCAGCAAGCGACTAGCATATATGGTGGCTAACCTATTCGCAAAAGAGAGCGAGAAGAGAAGGCAA	69	719689837	ENA|MKGO01000007|MKGO01000007.1 Triticum urartu cultivar G1812 chromosome 7, whole genome shotgun sequence.
SNP_1155881	ENA|MKGO01000007|MKGO01000007.1	95.652	69	3	0	1	69	296516418	296516350	4.15e-23	111	ENA|MKGO01000007|MKGO01000007.1	60	66	66	0	95.65	1	-1	TGCAGCAAGCGACTAGCATATATGGTGGCTAACTTATTCGCAAAAGAGAGCGAGAAGAGGAGGCAAGGC	TGCAGCAAGCGACTAGCATATATGGTGGCTAACTTATTCGCAAAGGAGAGAGAGAAGAGGAGGCAAAGC	69	719689837	ENA|MKGO01000007|MKGO01000007.1 Triticum urartu cultivar G1812 chromosome 7, whole genome shotgun sequence.
SNP_1155881	ENA|MKGO01000007|MKGO01000007.1	95.652	69	3	0	1	69	296589625	296589557	4.15e-23	111	ENA|MKGO01000007|MKGO01000007.1	60	66	66	0	95.65	1	-1	TGCAGCAAGCGACTAGCATATATGGTGGCTAACTTATTCGCAAAAGAGAGCGAGAAGAGGAGGCAAGGC	TGCAGCAAGCGACTAGCATATATGGTGGCTAACTTATTCGCAAAGGAGAGAGAGAAGAGGAGGCAAAGC	69	719689837	ENA|MKGO01000007|MKGO01000007.1 Triticum urartu cultivar G1812 chromosome 7, whole genome shotgun sequence.
SNP_1155881	ENA|MKGO01000007|MKGO01000007.1	95.652	69	3	0	1	69	298069196	298069128	4.15e-23	111	ENA|MKGO01000007|MKGO01000007.1	60	66	66	0	95.65	1	-1	TGCAGCAAGCGACTAGCATATATGGTGGCTAACTTATTCGCAAAAGAGAGCGAGAAGAGGAGGCAAGGC	TGCAGCAAGCGACTAGCAAGTATGGTGGCTAACTTATTCGCAAAAGAGAGCGAGAAGAGGAGGCAAAGC	69	719689837	ENA|MKGO01000007|MKGO01000007.1 Triticum urartu cultivar G1812 chromosome 7, whole genome shotgun sequence.
SNP_1155881	ENA|MKGO01000007|MKGO01000007.1	96.97	66	2	0	1	66	298665471	298665536	4.15e-23	111	ENA|MKGO01000007|MKGO01000007.1	60	64	64	0	96.97	1	1	TGCAGCAAGCGACTAGCATATATGGTGGCTAACTTATTCGCAAAAGAGAGCGAGAAGAGGAGGCAA	TGCAGCAAGCGACTAGCATATATGGTGGCTAACCTATTCGCAAAAGAGAGCGAGAAGAGAAGGCAA	69	719689837	ENA|MKGO01000007|MKGO01000007.1 Triticum urartu cultivar G1812 chromosome 7, whole genome shotgun sequence.
SNP_1155881	ENA|MKGO01000007|MKGO01000007.1	96.97	66	2	0	1	66	298953223	298953288	4.15e-23	111	ENA|MKGO01000007|MKGO01000007.1	60	64	64	0	96.97	1	1	TGCAGCAAGCGACTAGCATATATGGTGGCTAACTTATTCGCAAAAGAGAGCGAGAAGAGGAGGCAA	TGCAGCAAGCGACTAGCAAAAATGGTGGCTAACTTATTCGCAAAAGAGAGCGAGAAGAGGAGGCAA	69	719689837	ENA|MKGO01000007|MKGO01000007.1 Triticum urartu cultivar G1812 chromosome 7, whole genome shotgun sequence.
SNP_1155881	ENA|MKGO01000007|MKGO01000007.1	97.015	67	1	1	1	66	300603940	300604006	4.15e-23	111	ENA|MKGO01000007|MKGO01000007.1	60	65	65	1	97.01	1	1	TGCAGCAAGCGACTAGC-ATATATGGTGGCTAACTTATTCGCAAAAGAGAGCGAGAAGAGGAGGCAA	TGCAGCAAGCGACTAGCAAAATATGGTGGCTAACTTATTCGCAAAAGAGAGCGAGAAGAGGAGGCAA	69	719689837	ENA|MKGO01000007|MKGO01000007.1 Triticum urartu cultivar G1812 chromosome 7, whole genome shotgun sequence.
SNP_1155881	ENA|MKGO01000007|MKGO01000007.1	97.015	67	1	1	1	66	300769946	300770012	4.15e-23	111	ENA|MKGO01000007|MKGO01000007.1	60	65	65	1	97.01	1	1	TGCAGCAAGCGACTAGC-ATATATGGTGGCTAACTTATTCGCAAAAGAGAGCGAGAAGAGGAGGCAA	TGCAGCAAGCGACTAGCAAAATATGGTGGCTAACTTATTCGCAAAAGAGAGCGAGAAGAGGAGGCAA	69	719689837	ENA|MKGO01000007|MKGO01000007.1 Triticum urartu cultivar G1812 chromosome 7, whole genome shotgun sequence.
SNP_1155881	ENA|MKGO01000007|MKGO01000007.1	96.97	66	2	0	1	66	301159403	301159338	4.15e-23	111	ENA|MKGO01000007|MKGO01000007.1	60	64	64	0	96.97	1	-1	TGCAGCAAGCGACTAGCATATATGGTGGCTAACTTATTCGCAAAAGAGAGCGAGAAGAGGAGGCAA	TGCAACAAGCGACTAGCATATATGGTGGCTCACTTATTCGCAAAAGAGAGCGAGAAGAGGAGGCAA	69	719689837	ENA|MKGO01000007|MKGO01000007.1 Triticum urartu cultivar G1812 chromosome 7, whole genome shotgun sequence.
SNP_1155881	ENA|MKGO01000007|MKGO01000007.1	96.97	66	2	0	1	66	301203838	301203773	4.15e-23	111	ENA|MKGO01000007|MKGO01000007.1	60	64	64	0	96.97	1	-1	TGCAGCAAGCGACTAGCATATATGGTGGCTAACTTATTCGCAAAAGAGAGCGAGAAGAGGAGGCAA	TGCAACAAGCGACTAGCATATATGGTGGCTCACTTATTCGCAAAAGAGAGCGAGAAGAGGAGGCAA	69	719689837	ENA|MKGO01000007|MKGO01000007.1 Triticum urartu cultivar G1812 chromosome 7, whole genome shotgun sequence.
SNP_1155881	ENA|MKGO01000007|MKGO01000007.1	96.97	66	2	0	1	66	302938923	302938988	4.15e-23	111	ENA|MKGO01000007|MKGO01000007.1	60	64	64	0	96.97	1	1	TGCAGCAAGCGACTAGCATATATGGTGGCTAACTTATTCGCAAAAGAGAGCGAGAAGAGGAGGCAA	TGCAGCAAGCGACTAGCATATATGGTGGCTAACCTATTCGCAAAAGAGAGCGAGAAGAGAAGGCAA	69	719689837	ENA|MKGO01000007|MKGO01000007.1 Triticum urartu cultivar G1812 chromosome 7, whole genome shotgun sequence.
SNP_1155881	ENA|MKGO01000007|MKGO01000007.1	97.015	67	1	1	1	66	305508588	305508654	4.15e-23	111	ENA|MKGO01000007|MKGO01000007.1	60	65	65	1	97.01	1	1	TGCAGCAAGCGACTAGC-ATATATGGTGGCTAACTTATTCGCAAAAGAGAGCGAGAAGAGGAGGCAA	TGCAGCAAGCGACTAGCAAAATATGGTGGCTAACTTATTCGCAAAAGAGAGCGAGAAGAGGAGGCAA	69	719689837	ENA|MKGO01000007|MKGO01000007.1 Triticum urartu cultivar G1812 chromosome 7, whole genome shotgun sequence.
SNP_1155881	ENA|MKGO01000007|MKGO01000007.1	95.652	69	3	0	1	69	306837176	306837108	4.15e-23	111	ENA|MKGO01000007|MKGO01000007.1	60	66	66	0	95.65	1	-1	TGCAGCAAGCGACTAGCATATATGGTGGCTAACTTATTCGCAAAAGAGAGCGAGAAGAGGAGGCAAGGC	TGCAGCAAGCGACTACCATATATGGTGGCTATCTTATTCGCAAAAGAGAGCGAGAAGAGGAGGCAAAGC	69	719689837	ENA|MKGO01000007|MKGO01000007.1 Triticum urartu cultivar G1812 chromosome 7, whole genome shotgun sequence.
SNP_1155881	ENA|MKGO01000007|MKGO01000007.1	96.97	66	2	0	1	66	307820078	307820143	4.15e-23	111	ENA|MKGO01000007|MKGO01000007.1	60	64	64	0	96.97	1	1	TGCAGCAAGCGACTAGCATATATGGTGGCTAACTTATTCGCAAAAGAGAGCGAGAAGAGGAGGCAA	TGCAGCAAGCGACTAGCAAGTATGGTGGCTAACTTATTCGCAAAAGAGAGCGAGAAGAGGAGGCAA	69	719689837	ENA|MKGO01000007|MKGO01000007.1 Triticum urartu cultivar G1812 chromosome 7, whole genome shotgun sequence.
SNP_1155881	ENA|MKGO01000007|MKGO01000007.1	96.97	66	2	0	1	66	309292631	309292696	4.15e-23	111	ENA|MKGO01000007|MKGO01000007.1	60	64	64	0	96.97	1	1	TGCAGCAAGCGACTAGCATATATGGTGGCTAACTTATTCGCAAAAGAGAGCGAGAAGAGGAGGCAA	TGCAGCAAGCGACTAGCAAGTATGGTGGCTAACTTATTCGCAAAAGAGAGCGAGAAGAGGAGGCAA	69	719689837	ENA|MKGO01000007|MKGO01000007.1 Triticum urartu cultivar G1812 chromosome 7, whole genome shotgun sequence.
SNP_1155881	ENA|MKGO01000007|MKGO01000007.1	96.97	66	2	0	1	66	309302152	309302217	4.15e-23	111	ENA|MKGO01000007|MKGO01000007.1	60	64	64	0	96.97	1	1	TGCAGCAAGCGACTAGCATATATGGTGGCTAACTTATTCGCAAAAGAGAGCGAGAAGAGGAGGCAA	TGCAGCAAGCGACTAGCAAGTATGGTGGCTAACTTATTCGCAAAAGAGAGCGAGAAGAGGAGGCAA	69	719689837	ENA|MKGO01000007|MKGO01000007.1 Triticum urartu cultivar G1812 chromosome 7, whole genome shotgun sequence.
SNP_1155881	ENA|MKGO01000007|MKGO01000007.1	96.97	66	2	0	1	66	309663206	309663271	4.15e-23	111	ENA|MKGO01000007|MKGO01000007.1	60	64	64	0	96.97	1	1	TGCAGCAAGCGACTAGCATATATGGTGGCTAACTTATTCGCAAAAGAGAGCGAGAAGAGGAGGCAA	TGCAGCAAGCGACTAGCATATATGGTGGCTAACCTATTCGCAAAAGAGAGCGAGAAGAGAAGGCAA	69	719689837	ENA|MKGO01000007|MKGO01000007.1 Triticum urartu cultivar G1812 chromosome 7, whole genome shotgun sequence.
SNP_1155881	ENA|MKGO01000007|MKGO01000007.1	96.97	66	2	0	1	66	310752858	310752923	4.15e-23	111	ENA|MKGO01000007|MKGO01000007.1	60	64	64	0	96.97	1	1	TGCAGCAAGCGACTAGCATATATGGTGGCTAACTTATTCGCAAAAGAGAGCGAGAAGAGGAGGCAA	TGCAGCAAGCGACTAGCATATATGGTGGCTAACCTGTTCGCAAAAGAGAGCGAGAAGAGGAGGCAA	69	719689837	ENA|MKGO01000007|MKGO01000007.1 Triticum urartu cultivar G1812 chromosome 7, whole genome shotgun sequence.
SNP_1155881	ENA|MKGO01000007|MKGO01000007.1	96.97	66	2	0	1	66	313900521	313900456	4.15e-23	111	ENA|MKGO01000007|MKGO01000007.1	60	64	64	0	96.97	1	-1	TGCAGCAAGCGACTAGCATATATGGTGGCTAACTTATTCGCAAAAGAGAGCGAGAAGAGGAGGCAA	TGCAGCAAGCGACTAACAAATATGGTGGCTAACTTATTCGCAAAAGAGAGCGAGAAGAGGAGGCAA	69	719689837	ENA|MKGO01000007|MKGO01000007.1 Triticum urartu cultivar G1812 chromosome 7, whole genome shotgun sequence.
SNP_1155881	ENA|MKGO01000007|MKGO01000007.1	96.97	66	2	0	1	66	313909319	313909254	4.15e-23	111	ENA|MKGO01000007|MKGO01000007.1	60	64	64	0	96.97	1	-1	TGCAGCAAGCGACTAGCATATATGGTGGCTAACTTATTCGCAAAAGAGAGCGAGAAGAGGAGGCAA	TGCAGCAAGCGACTAGCAAATATGGTGGCTAACTTATTCGCAAAAGAGAGCAAGAAGAGGAGGCAA	69	719689837	ENA|MKGO01000007|MKGO01000007.1 Triticum urartu cultivar G1812 chromosome 7, whole genome shotgun sequence.
SNP_1155881	ENA|MKGO01000007|MKGO01000007.1	95.652	69	3	0	1	69	314237497	314237429	4.15e-23	111	ENA|MKGO01000007|MKGO01000007.1	60	66	66	0	95.65	1	-1	TGCAGCAAGCGACTAGCATATATGGTGGCTAACTTATTCGCAAAAGAGAGCGAGAAGAGGAGGCAAGGC	TGCAGCAAGCGACTAGCATATATGGTGGCTAACCTATTCGCAAAAGAGAGCGAGAAGAGAAGGCAAAGC	69	719689837	ENA|MKGO01000007|MKGO01000007.1 Triticum urartu cultivar G1812 chromosome 7, whole genome shotgun sequence.
SNP_1155881	ENA|MKGO01000007|MKGO01000007.1	95.652	69	3	0	1	69	314829374	314829306	4.15e-23	111	ENA|MKGO01000007|MKGO01000007.1	60	66	66	0	95.65	1	-1	TGCAGCAAGCGACTAGCATATATGGTGGCTAACTTATTCGCAAAAGAGAGCGAGAAGAGGAGGCAAGGC	TGCAGCAAGCGACTAGCATATATGGTGGCTAACCTGTTCGCAAAAGAGAGCGAGAAGAGGAGGCAAAGC	69	719689837	ENA|MKGO01000007|MKGO01000007.1 Triticum urartu cultivar G1812 chromosome 7, whole genome shotgun sequence.
SNP_1155881	ENA|MKGO01000007|MKGO01000007.1	95.652	69	3	0	1	69	315495501	315495433	4.15e-23	111	ENA|MKGO01000007|MKGO01000007.1	60	66	66	0	95.65	1	-1	TGCAGCAAGCGACTAGCATATATGGTGGCTAACTTATTCGCAAAAGAGAGCGAGAAGAGGAGGCAAGGC	TGCAGCAAGCAACTAGCATATATGATGGCTAACTTATTCGCAAAAGAGAGCGAGAAGAGGAGGCAAAGC	69	719689837	ENA|MKGO01000007|MKGO01000007.1 Triticum urartu cultivar G1812 chromosome 7, whole genome shotgun sequence.
SNP_1155881	ENA|MKGO01000007|MKGO01000007.1	95.652	69	3	0	1	69	317419055	317418987	4.15e-23	111	ENA|MKGO01000007|MKGO01000007.1	60	66	66	0	95.65	1	-1	TGCAGCAAGCGACTAGCATATATGGTGGCTAACTTATTCGCAAAAGAGAGCGAGAAGAGGAGGCAAGGC	TGCAGCAAGCGACTTGCATATATGGTGGCTAACTTATTCGCAAAGGAGAGCGAGAAGAGGAGGCAAAGC	69	719689837	ENA|MKGO01000007|MKGO01000007.1 Triticum urartu cultivar G1812 chromosome 7, whole genome shotgun sequence.
SNP_1155881	ENA|MKGO01000007|MKGO01000007.1	95.652	69	3	0	1	69	317547688	317547620	4.15e-23	111	ENA|MKGO01000007|MKGO01000007.1	60	66	66	0	95.65	1	-1	TGCAGCAAGCGACTAGCATATATGGTGGCTAACTTATTCGCAAAAGAGAGCGAGAAGAGGAGGCAAGGC	TGCAGCAAGCGACTAGCATATATGGTGGCTATCTTATACGCAAAAGAGAGCGAGAAGAGGAGGCAAAGC	69	719689837	ENA|MKGO01000007|MKGO01000007.1 Triticum urartu cultivar G1812 chromosome 7, whole genome shotgun sequence.
SNP_1155881	ENA|MKGO01000007|MKGO01000007.1	96.97	66	2	0	1	66	319041977	319042042	4.15e-23	111	ENA|MKGO01000007|MKGO01000007.1	60	64	64	0	96.97	1	1	TGCAGCAAGCGACTAGCATATATGGTGGCTAACTTATTCGCAAAAGAGAGCGAGAAGAGGAGGCAA	TGCAGCAAGCGACTAGCATATATGGTGGCTATCTTATTCGCAAGAGAGAGCGAGAAGAGGAGGCAA	69	719689837	ENA|MKGO01000007|MKGO01000007.1 Triticum urartu cultivar G1812 chromosome 7, whole genome shotgun sequence.
SNP_1155881	ENA|MKGO01000007|MKGO01000007.1	96.97	66	2	0	1	66	319408292	319408357	4.15e-23	111	ENA|MKGO01000007|MKGO01000007.1	60	64	64	0	96.97	1	1	TGCAGCAAGCGACTAGCATATATGGTGGCTAACTTATTCGCAAAAGAGAGCGAGAAGAGGAGGCAA	TGCAGCAAGCGACTAGCATATATGGTGGCTAACCTGTTCGCAAAAGAGAGCGAGAAGAGGAGGCAA	69	719689837	ENA|MKGO01000007|MKGO01000007.1 Triticum urartu cultivar G1812 chromosome 7, whole genome shotgun sequence.
SNP_1155881	ENA|MKGO01000007|MKGO01000007.1	96.97	66	2	0	1	66	319780695	319780760	4.15e-23	111	ENA|MKGO01000007|MKGO01000007.1	60	64	64	0	96.97	1	1	TGCAGCAAGCGACTAGCATATATGGTGGCTAACTTATTCGCAAAAGAGAGCGAGAAGAGGAGGCAA	TGCAGCAAGCGACTAGCAAGTATGGTGGCTAACTTATTCGCAAAAGAGAGCGAGAAGAGGAGGCAA	69	719689837	ENA|MKGO01000007|MKGO01000007.1 Triticum urartu cultivar G1812 chromosome 7, whole genome shotgun sequence.
SNP_1155881	ENA|MKGO01000007|MKGO01000007.1	96.97	66	2	0	1	66	322115928	322115993	4.15e-23	111	ENA|MKGO01000007|MKGO01000007.1	60	64	64	0	96.97	1	1	TGCAGCAAGCGACTAGCATATATGGTGGCTAACTTATTCGCAAAAGAGAGCGAGAAGAGGAGGCAA	TGCAGCAAGCGACTAGCATATATGGTGGCTAACCTATTCGCAAAAGAGAGCGAGAAGAGAAGGCAA	69	719689837	ENA|MKGO01000007|MKGO01000007.1 Triticum urartu cultivar G1812 chromosome 7, whole genome shotgun sequence.
SNP_1155881	ENA|MKGO01000007|MKGO01000007.1	95.652	69	3	0	1	69	322159996	322159928	4.15e-23	111	ENA|MKGO01000007|MKGO01000007.1	60	66	66	0	95.65	1	-1	TGCAGCAAGCGACTAGCATATATGGTGGCTAACTTATTCGCAAAAGAGAGCGAGAAGAGGAGGCAAGGC	TGCAGCAAGCGACTAGCATATATGGTGGCTAACCTATTCGCAAAAGAGAGCGAGAAGAGAAGGCAAAGC	69	719689837	ENA|MKGO01000007|MKGO01000007.1 Triticum urartu cultivar G1812 chromosome 7, whole genome shotgun sequence.
SNP_1155881	ENA|MKGO01000007|MKGO01000007.1	96.97	66	2	0	1	66	324364324	324364389	4.15e-23	111	ENA|MKGO01000007|MKGO01000007.1	60	64	64	0	96.97	1	1	TGCAGCAAGCGACTAGCATATATGGTGGCTAACTTATTCGCAAAAGAGAGCGAGAAGAGGAGGCAA	TGCAGCAAGCGACTAGCAAGTATGGTGGCTAACTTATTCGCAAAAGAGAGCGAGAAGAGGAGGCAA	69	719689837	ENA|MKGO01000007|MKGO01000007.1 Triticum urartu cultivar G1812 chromosome 7, whole genome shotgun sequence.
SNP_1155881	ENA|MKGO01000007|MKGO01000007.1	95.714	70	2	1	1	69	324972332	324972263	4.15e-23	111	ENA|MKGO01000007|MKGO01000007.1	60	67	67	1	95.71	1	-1	TGCAGCAAGCGACTAGCA-TATATGGTGGCTAACTTATTCGCAAAAGAGAGCGAGAAGAGGAGGCAAGGC	TGCAGCAAGCGACTAGCAAAATATGGTGGCTAACTTATTCGCAAAAGAGAGCGAGAAGAGGAGGCAAAGC	69	719689837	ENA|MKGO01000007|MKGO01000007.1 Triticum urartu cultivar G1812 chromosome 7, whole genome shotgun sequence.
SNP_1155881	ENA|MKGO01000007|MKGO01000007.1	96.97	66	2	0	1	66	325525743	325525678	4.15e-23	111	ENA|MKGO01000007|MKGO01000007.1	60	64	64	0	96.97	1	-1	TGCAGCAAGCGACTAGCATATATGGTGGCTAACTTATTCGCAAAAGAGAGCGAGAAGAGGAGGCAA	TGCAGCAAGCGACTAGCATATATGGTGGCTAACTTATTCGCAAAAGAGAGTGAGAAGAGAAGGCAA	69	719689837	ENA|MKGO01000007|MKGO01000007.1 Triticum urartu cultivar G1812 chromosome 7, whole genome shotgun sequence.
SNP_1155881	ENA|MKGO01000007|MKGO01000007.1	96.97	66	2	0	1	66	325769323	325769258	4.15e-23	111	ENA|MKGO01000007|MKGO01000007.1	60	64	64	0	96.97	1	-1	TGCAGCAAGCGACTAGCATATATGGTGGCTAACTTATTCGCAAAAGAGAGCGAGAAGAGGAGGCAA	TGCAGCAAGCGACTAGCATATATGGTGGCTAACTTATTCGCAAAAGAGAGTGAGAAGAGAAGGCAA	69	719689837	ENA|MKGO01000007|MKGO01000007.1 Triticum urartu cultivar G1812 chromosome 7, whole genome shotgun sequence.
SNP_1155881	ENA|MKGO01000007|MKGO01000007.1	96.97	66	2	0	1	66	327511214	327511279	4.15e-23	111	ENA|MKGO01000007|MKGO01000007.1	60	64	64	0	96.97	1	1	TGCAGCAAGCGACTAGCATATATGGTGGCTAACTTATTCGCAAAAGAGAGCGAGAAGAGGAGGCAA	TGCAGCAAGCGACTAGCATATGTGGTGGCTATCTTATTCGCAAAAGAGAGCGAGAAGAGGAGGCAA	69	719689837	ENA|MKGO01000007|MKGO01000007.1 Triticum urartu cultivar G1812 chromosome 7, whole genome shotgun sequence.
SNP_1155881	ENA|MKGO01000007|MKGO01000007.1	95.652	69	3	0	1	69	328464804	328464736	4.15e-23	111	ENA|MKGO01000007|MKGO01000007.1	60	66	66	0	95.65	1	-1	TGCAGCAAGCGACTAGCATATATGGTGGCTAACTTATTCGCAAAAGAGAGCGAGAAGAGGAGGCAAGGC	TGCAGCAAGCGACTAGCATATATGGTGGCTAACTTATTCGGAAAAGAGAGCGAGAAGAGGGGGCAAAGC	69	719689837	ENA|MKGO01000007|MKGO01000007.1 Triticum urartu cultivar G1812 chromosome 7, whole genome shotgun sequence.
SNP_1155881	ENA|MKGO01000007|MKGO01000007.1	95.652	69	3	0	1	69	328536636	328536568	4.15e-23	111	ENA|MKGO01000007|MKGO01000007.1	60	66	66	0	95.65	1	-1	TGCAGCAAGCGACTAGCATATATGGTGGCTAACTTATTCGCAAAAGAGAGCGAGAAGAGGAGGCAAGGC	TGCAGCAAGCGACTAGCATATATGGTGGCTAACTTATTCGGAAAAGAGAGCGAGAAGAGGGGGCAAAGC	69	719689837	ENA|MKGO01000007|MKGO01000007.1 Triticum urartu cultivar G1812 chromosome 7, whole genome shotgun sequence.
SNP_1155881	ENA|MKGO01000007|MKGO01000007.1	95.652	69	3	0	1	69	328594076	328594008	4.15e-23	111	ENA|MKGO01000007|MKGO01000007.1	60	66	66	0	95.65	1	-1	TGCAGCAAGCGACTAGCATATATGGTGGCTAACTTATTCGCAAAAGAGAGCGAGAAGAGGAGGCAAGGC	TGCAGCAAGCGACTAGCATATATGGTGGCTAACCTATTCGCAAAAGAGAGCGAGAAGAGAAGGCAAAGC	69	719689837	ENA|MKGO01000007|MKGO01000007.1 Triticum urartu cultivar G1812 chromosome 7, whole genome shotgun sequence.
SNP_1155881	ENA|MKGO01000007|MKGO01000007.1	95.652	69	3	0	1	69	330693637	330693569	4.15e-23	111	ENA|MKGO01000007|MKGO01000007.1	60	66	66	0	95.65	1	-1	TGCAGCAAGCGACTAGCATATATGGTGGCTAACTTATTCGCAAAAGAGAGCGAGAAGAGGAGGCAAGGC	TGCAGCAAGCGACTAGCATATATGGTGGCTAACCTGTTCGCAAAAGAGAGCGAGAAGAGGAGGCAAAGC	69	719689837	ENA|MKGO01000007|MKGO01000007.1 Triticum urartu cultivar G1812 chromosome 7, whole genome shotgun sequence.
SNP_1155881	ENA|MKGO01000007|MKGO01000007.1	96.97	66	2	0	1	66	330993281	330993216	4.15e-23	111	ENA|MKGO01000007|MKGO01000007.1	60	64	64	0	96.97	1	-1	TGCAGCAAGCGACTAGCATATATGGTGGCTAACTTATTCGCAAAAGAGAGCGAGAAGAGGAGGCAA	TGCAGCAAGCGACTAGCATATATGGTGGCTAACATATTCGCAAAAGAGAGCGAGAAGAGCAGGCAA	69	719689837	ENA|MKGO01000007|MKGO01000007.1 Triticum urartu cultivar G1812 chromosome 7, whole genome shotgun sequence.
SNP_1155881	ENA|MKGO01000007|MKGO01000007.1	96.97	66	2	0	1	66	333353191	333353256	4.15e-23	111	ENA|MKGO01000007|MKGO01000007.1	60	64	64	0	96.97	1	1	TGCAGCAAGCGACTAGCATATATGGTGGCTAACTTATTCGCAAAAGAGAGCGAGAAGAGGAGGCAA	TGCAGCAAGCGACTAGCAAATATGGTGGCTAACTTATTCGCAAAAGAGAGCGAGAAGAGGAGACAA	69	719689837	ENA|MKGO01000007|MKGO01000007.1 Triticum urartu cultivar G1812 chromosome 7, whole genome shotgun sequence.
SNP_1155881	ENA|MKGO01000007|MKGO01000007.1	96.97	66	2	0	1	66	334048874	334048939	4.15e-23	111	ENA|MKGO01000007|MKGO01000007.1	60	64	64	0	96.97	1	1	TGCAGCAAGCGACTAGCATATATGGTGGCTAACTTATTCGCAAAAGAGAGCGAGAAGAGGAGGCAA	TGCGGCAAGCGACTAGCATATATGGTGGCTAACTTATTCGCAAAAGAGAGCGAGAAGAGAAGGCAA	69	719689837	ENA|MKGO01000007|MKGO01000007.1 Triticum urartu cultivar G1812 chromosome 7, whole genome shotgun sequence.
SNP_1155881	ENA|MKGO01000007|MKGO01000007.1	96.97	66	2	0	1	66	334447543	334447478	4.15e-23	111	ENA|MKGO01000007|MKGO01000007.1	60	64	64	0	96.97	1	-1	TGCAGCAAGCGACTAGCATATATGGTGGCTAACTTATTCGCAAAAGAGAGCGAGAAGAGGAGGCAA	TGCGGCAAGCGACTAGCATATATGGTGGCTAACTTATTCGCAAAAGAGAGCGAGAAGAGAAGGCAA	69	719689837	ENA|MKGO01000007|MKGO01000007.1 Triticum urartu cultivar G1812 chromosome 7, whole genome shotgun sequence.
SNP_1155881	ENA|MKGO01000007|MKGO01000007.1	96.97	66	2	0	1	66	334578624	334578689	4.15e-23	111	ENA|MKGO01000007|MKGO01000007.1	60	64	64	0	96.97	1	1	TGCAGCAAGCGACTAGCATATATGGTGGCTAACTTATTCGCAAAAGAGAGCGAGAAGAGGAGGCAA	TGCGGCAAGCGACTAGCATATATGGTGGCTAACTTATTCGCAAAAGAGAGCGAGAAGAGAAGGCAA	69	719689837	ENA|MKGO01000007|MKGO01000007.1 Triticum urartu cultivar G1812 chromosome 7, whole genome shotgun sequence.
SNP_1155881	ENA|MKGO01000007|MKGO01000007.1	96.97	66	2	0	1	66	336072972	336073037	4.15e-23	111	ENA|MKGO01000007|MKGO01000007.1	60	64	64	0	96.97	1	1	TGCAGCAAGCGACTAGCATATATGGTGGCTAACTTATTCGCAAAAGAGAGCGAGAAGAGGAGGCAA	TGCAGCAAGCGACTAGCAAATATGGTGGCTAACTAATTCGCAAAAGAGAGCGAGAAGAGGAGGCAA	69	719689837	ENA|MKGO01000007|MKGO01000007.1 Triticum urartu cultivar G1812 chromosome 7, whole genome shotgun sequence.
SNP_1155881	ENA|MKGO01000007|MKGO01000007.1	96.97	66	2	0	1	66	336082591	336082656	4.15e-23	111	ENA|MKGO01000007|MKGO01000007.1	60	64	64	0	96.97	1	1	TGCAGCAAGCGACTAGCATATATGGTGGCTAACTTATTCGCAAAAGAGAGCGAGAAGAGGAGGCAA	TGCAGCAAGCGACTAGCAAATATGGTGGCTAACTAATTCGCAAAAGAGAGCGAGAAGAGGAGGCAA	69	719689837	ENA|MKGO01000007|MKGO01000007.1 Triticum urartu cultivar G1812 chromosome 7, whole genome shotgun sequence.
SNP_1155881	ENA|MKGO01000007|MKGO01000007.1	96.97	66	2	0	1	66	336815539	336815604	4.15e-23	111	ENA|MKGO01000007|MKGO01000007.1	60	64	64	0	96.97	1	1	TGCAGCAAGCGACTAGCATATATGGTGGCTAACTTATTCGCAAAAGAGAGCGAGAAGAGGAGGCAA	TGCAGCAAGCGACTAGCAAGTATGGTGGCTAACTTATTCGCAAAAGAGAGCGAGAAGAGGAGGCAA	69	719689837	ENA|MKGO01000007|MKGO01000007.1 Triticum urartu cultivar G1812 chromosome 7, whole genome shotgun sequence.
SNP_1155881	ENA|MKGO01000007|MKGO01000007.1	95.652	69	3	0	1	69	336922755	336922687	4.15e-23	111	ENA|MKGO01000007|MKGO01000007.1	60	66	66	0	95.65	1	-1	TGCAGCAAGCGACTAGCATATATGGTGGCTAACTTATTCGCAAAAGAGAGCGAGAAGAGGAGGCAAGGC	TGCAGCAAGCGACTAGCAAGTATGGTGGCTAACTTATTCGCAAAAGAGAGCGAGAAGAGGAGGCAAAGC	69	719689837	ENA|MKGO01000007|MKGO01000007.1 Triticum urartu cultivar G1812 chromosome 7, whole genome shotgun sequence.
SNP_1155881	ENA|MKGO01000007|MKGO01000007.1	96.97	66	2	0	1	66	340675983	340676048	4.15e-23	111	ENA|MKGO01000007|MKGO01000007.1	60	64	64	0	96.97	1	1	TGCAGCAAGCGACTAGCATATATGGTGGCTAACTTATTCGCAAAAGAGAGCGAGAAGAGGAGGCAA	TGCAGCAAGCGACTAGCATATATGGTGGCTAACATATTCGCAAAAGAGAGCGAGAAGAGAAGGCAA	69	719689837	ENA|MKGO01000007|MKGO01000007.1 Triticum urartu cultivar G1812 chromosome 7, whole genome shotgun sequence.
SNP_1155881	ENA|MKGO01000007|MKGO01000007.1	96.97	66	2	0	1	66	341576697	341576762	4.15e-23	111	ENA|MKGO01000007|MKGO01000007.1	60	64	64	0	96.97	1	1	TGCAGCAAGCGACTAGCATATATGGTGGCTAACTTATTCGCAAAAGAGAGCGAGAAGAGGAGGCAA	TGCAGCAAGCGACTAGCTAATATGGTGGCTAACTTATTCGCAAAAGAGAGCGAGAAGAGGAGGCAA	69	719689837	ENA|MKGO01000007|MKGO01000007.1 Triticum urartu cultivar G1812 chromosome 7, whole genome shotgun sequence.
SNP_1155881	ENA|MKGO01000007|MKGO01000007.1	96.97	66	2	0	1	66	342231670	342231735	4.15e-23	111	ENA|MKGO01000007|MKGO01000007.1	60	64	64	0	96.97	1	1	TGCAGCAAGCGACTAGCATATATGGTGGCTAACTTATTCGCAAAAGAGAGCGAGAAGAGGAGGCAA	TGCAGCAAGCGACTAGCAAGTATGGTGGCTAACTTATTCGCAAAAGAGAGCGAGAAGAGGAGGCAA	69	719689837	ENA|MKGO01000007|MKGO01000007.1 Triticum urartu cultivar G1812 chromosome 7, whole genome shotgun sequence.
SNP_1155881	ENA|MKGO01000007|MKGO01000007.1	96.97	66	2	0	1	66	343446607	343446672	4.15e-23	111	ENA|MKGO01000007|MKGO01000007.1	60	64	64	0	96.97	1	1	TGCAGCAAGCGACTAGCATATATGGTGGCTAACTTATTCGCAAAAGAGAGCGAGAAGAGGAGGCAA	TGCAGCAAGCGACTAGCATATATGGTGGCTAACATATTCGCAAAAGAGAGCGAGAAGAGAAGGCAA	69	719689837	ENA|MKGO01000007|MKGO01000007.1 Triticum urartu cultivar G1812 chromosome 7, whole genome shotgun sequence.
SNP_1155881	ENA|MKGO01000007|MKGO01000007.1	95.652	69	3	0	1	69	345548440	345548372	4.15e-23	111	ENA|MKGO01000007|MKGO01000007.1	60	66	66	0	95.65	1	-1	TGCAGCAAGCGACTAGCATATATGGTGGCTAACTTATTCGCAAAAGAGAGCGAGAAGAGGAGGCAAGGC	TGCAGCAAGCGACTAGCATATATGGTGGCTAACCTGTTCGCAAAAGAGAGCGAGAAGAGGAGGCAAAGC	69	719689837	ENA|MKGO01000007|MKGO01000007.1 Triticum urartu cultivar G1812 chromosome 7, whole genome shotgun sequence.
SNP_1155881	ENA|MKGO01000007|MKGO01000007.1	95.714	70	2	1	1	69	347902152	347902083	4.15e-23	111	ENA|MKGO01000007|MKGO01000007.1	60	67	67	1	95.71	1	-1	TGCAGCAAGCGACTAGCA-TATATGGTGGCTAACTTATTCGCAAAAGAGAGCGAGAAGAGGAGGCAAGGC	TGCAGCAAGCGACTAGCAAAATATGGTGGCTAACTTATTCGCAAAAGAGAGCGAGAAGAGGAGGCAAAGC	69	719689837	ENA|MKGO01000007|MKGO01000007.1 Triticum urartu cultivar G1812 chromosome 7, whole genome shotgun sequence.
SNP_1155881	ENA|MKGO01000007|MKGO01000007.1	95.714	70	2	1	1	69	348281103	348281034	4.15e-23	111	ENA|MKGO01000007|MKGO01000007.1	60	67	67	1	95.71	1	-1	TGCAGCAAGCGACTAGCA-TATATGGTGGCTAACTTATTCGCAAAAGAGAGCGAGAAGAGGAGGCAAGGC	TGCAGCAAGCGACTAGCAAAATATGGTGGCTAACTTATTCGCAAAAGAGAGCGAGAAGAGGAGGCAAAGC	69	719689837	ENA|MKGO01000007|MKGO01000007.1 Triticum urartu cultivar G1812 chromosome 7, whole genome shotgun sequence.
SNP_1155881	ENA|MKGO01000007|MKGO01000007.1	95.714	70	2	1	1	69	348290689	348290620	4.15e-23	111	ENA|MKGO01000007|MKGO01000007.1	60	67	67	1	95.71	1	-1	TGCAGCAAGCGACTAGCA-TATATGGTGGCTAACTTATTCGCAAAAGAGAGCGAGAAGAGGAGGCAAGGC	TGCAGCAAGCGACTAGCAAAATATGGTGGCTAACTTATTCGCAAAAGAGAGCGAGAAGAGGAGGCAAAGC	69	719689837	ENA|MKGO01000007|MKGO01000007.1 Triticum urartu cultivar G1812 chromosome 7, whole genome shotgun sequence.
SNP_1155881	ENA|MKGO01000007|MKGO01000007.1	95.652	69	3	0	1	69	349234319	349234251	4.15e-23	111	ENA|MKGO01000007|MKGO01000007.1	60	66	66	0	95.65	1	-1	TGCAGCAAGCGACTAGCATATATGGTGGCTAACTTATTCGCAAAAGAGAGCGAGAAGAGGAGGCAAGGC	TGCAGCAAGCGACTAGCATATATGGTGGCTAACATGTTCGCAAAAGAGAGCGAGAAGAGGAGGCAAAGC	69	719689837	ENA|MKGO01000007|MKGO01000007.1 Triticum urartu cultivar G1812 chromosome 7, whole genome shotgun sequence.
[truncated: 80,189 more rows]
