# Supplementary material for: Mapping of prehaustorial resistance against wheat leaf rust in einkorn (Triticum monococcum), a progenitor of wheat
Source: Front Plant Sci. 2023 Oct 23;14:1252123. doi: 10.3389/fpls.2023.1252123 (PMC10626456; doi:10.3389/fpls.2023.1252123)
Supplement: Supplementary file 6 [file Table_6.xlsx]

## Sheet: Table_S6
Table S6: Relative expression values of MACE that could be anchored to genes on chromosome 5.
This table includes the relative expression values that were calculated for the respective MACE for inoculated and not inoculated samples 8,. 16 and 24 hours after inoculation (hai).
To anchor the genes to the MACE, transcripts of the genes, a BLASTN search was performed with standard parameters.
Abbreviations and more detailed informateion are explained at the bottom of the table.
Chromosome	Position	Gene	Query accession dot version	Subject accession dot version (database hit)	Percentage of identical matches	Alignment length	Number of mismatches	Number of gap openings	Start of alignment in query	End of alignment in query	Start of alignment in subject (database hit)	End of alignment in subject (database hit)	Expectation value (E-value)	Bit score	Relative expression value (REV) 1						Relative expression value (REV) 2
			(qaccver)	(saccver )	(pident )	(length )	(mismatch )	(gapopen )	(qstart )	(qend)	(sstart )	(send )	(evalue )	(bitscore )	REV1-8hai_nin	REV1-8hai_in	REV1-24hai_nin	REV1-24hai_in	REV1-16hai_nin	REV1-16hai_in	REV2-8hai_nin	REV2-8hai_in	REV2-24hai_nin	REV2-24hai_in	REV2-16hai_nin	REV2-16hai_in
5A	884363	TuG1812G0500000010.01	TuG1812G0500000010.01.T01	TC241949	95.407	479	20	2	1	479	2134	2610	0	761	1.14901	0.494938	1.92099	0.153418	0.792286	0.448777	-0.870313	-2.02046	-0.520566	-6.51816	-1.26217	-2.22828
5A	884363	TuG1812G0500000010.01	TuG1812G0500000010.01.T01	TC435088	97	500	8	4	1	500	2026	2518	0	833	2.06822	0.692913	NA	0	NA	NA	-0.483507	-1.44318	NA	NA	0	NA
5A	884363	TuG1812G0500000010.01	TuG1812G0500000010.01.T01	comp5651_c0_seq1	97.832	369	8	0	7	375	2217	2585	0	638	1.16942	0.931758	0.993163	0.932903	1.20617	0.941507	-0.855128	-1.07324	-1.00688	-1.07192	-0.829073	-1.06213
5A	1550123	TuG1812G0500000012.01	TuG1812G0500000012.01.T01	comp19698_c0_seq1	95.082	61	3	0	220	280	737	677	1.37e-19	97.1	2.19749	1.15485	0.82328	1.07392	1.23597	1.12441	-0.455065	-0.86591	-1.21465	-0.931165	-0.809084	-0.889357
5A	1554463	TuG1812G0500000013.01	TuG1812G0500000013.01.T01	CD894776	99.485	194	1	0	1	194	2107	2300	1.38e-96	353	NA	NA	NA	2.14785	NA	NA	0	0	0	-0.465583	0	NA
5A	1799645	TuG1812G0500000014.01	TuG1812G0500000014.01.T01	TC409720	98.99	396	4	0	1	396	3493	3888	0	710	1.16338	0.962379	1.92099	0.565223	0.713057	0.730865	-0.859568	-1.03909	-0.520566	-1.76921	-1.40241	-1.36824
5A	2583025	TuG1812G0500000018.01	TuG1812G0500000018.01.T01	AV940713	96.603	471	16	0	30	500	385	855	0	782	NA	NA	0	0.536962	0.594214	1.21811	NA	NA	NA	-1.86233	-1.68289	-0.820945
5A	2583025	TuG1812G0500000018.01	TuG1812G0500000018.01.T01	TC266299	94.406	286	16	0	8	293	1550	1835	1.03e-122	440	1.55117	1.53981	0.548853	0.268481	2.37686	2.43622	-0.644676	-0.649432	-1.82198	-3.72466	-0.420724	-0.410473
5A	2583025	TuG1812G0500000018.01	TuG1812G0500000018.01.T01	TC368944	92.039	515	17	24	1	494	758	1269	0	702	NA	0	NA	0.715949	0.475371	0.609054	0	NA	0	-1.39675	-2.10362	-1.64189
5A	2583025	TuG1812G0500000018.01	TuG1812G0500000018.01.T01	TC370146	99.437	355	1	1	1	354	1678	2032	0	643	1.55117	2.69466	1.09771	0.536962	0.198071	1.21811	-0.644676	-0.371104	-0.91099	-1.86233	-5.04868	-0.820945
5A	2583025	TuG1812G0500000018.01	TuG1812G0500000018.01.T01	TC381186	89.002	491	30	24	1	467	1417	1907	3.46e-167	588	NA	0	0.274427	NA	1.18843	1.82716	0	NA	-3.64396	NA	-0.841447	-0.547297
5A	2583025	TuG1812G0500000018.01	TuG1812G0500000018.01.T01	TC448121	97.791	498	10	1	1	498	1576	2072	0	857	0	1.15485	NA	2.14785	NA	NA	NA	-0.86591	0	-0.465583	NA	0
5A	2583025	TuG1812G0500000018.01	TuG1812G0500000018.01.T01	TC452415	99.457	184	1	0	17	200	1918	1735	4.84e-91	335	1.63734	1.24369	0.768394	1.81741	0.594214	0.957085	-0.610746	-0.804059	-1.30141	-0.550234	-1.68289	-1.04484
5A	2583025	TuG1812G0500000018.01	TuG1812G0500000018.01.T01	comp3687_c0_seq1	99.443	359	2	0	17	375	2032	1674	0	652	1.07978	1.1917	0.609925	0.777252	0.667849	1.11509	-0.926111	-0.839139	-1.63955	-1.28658	-1.49734	-0.896792
5A	2891359	TuG1812G0500000025.01	TuG1812G0500000025.01.T01	comp19602_c0_seq1	93.836	146	9	0	29	174	146	1	9.38e-57	220	0.206822	0.329958	NA	2.14785	2.773	1.21811	-4.83507	-3.03068	0	-0.465583	-0.36062	-0.820945
5A	2891359	TuG1812G0500000025.01	TuG1812G0500000025.01.T01	comp19602_c0_seq2	95.205	146	7	0	29	174	146	1	4.26e-60	231	0.258528	0.769903	0.82328	1.07392	14.2611	1.70535	-3.86806	-1.29886	-1.21465	-0.931165	-0.0701206	-0.586389
5A	3158658	TuG1812G0500000029.01	TuG1812G0500000029.01.T01	TC407487	98.603	501	6	1	1	500	2056	2556	0	885	1.41015	1.50131	1.395	0.968636	0.702253	0.999473	-0.709144	-0.666085	-0.716845	-1.03238	-1.42399	-1.00053
5A	3158658	TuG1812G0500000029.01	TuG1812G0500000029.01.T01	comp10043_c0_seq1	98.592	213	3	0	1	213	2343	2555	3.28e-104	377	2.19749	1.58457	0.768394	0.800178	0.733286	1.20165	-0.455065	-0.631087	-1.30141	-1.24972	-1.36373	-0.832191
5A	3158658	TuG1812G0500000029.01	TuG1812G0500000029.01.T01	comp9975_c0_seq1	96.429	308	8	1	1	308	2081	2385	2.14e-142	505	1.79738	1.3077	0.762296	0.847315	0.722859	1.0963	-0.556364	-0.7647	-1.31183	-1.1802	-1.3834	-0.912161
5A	3180212	TuG1812G0500000030.01	TuG1812G0500000030.01.T02	BJ246777	99.392	329	2	0	1	329	467	795	5.76e-170	597	0.517056	NA	NA	0	NA	0	-1.93403	NA	0	NA	NA	NA
5A	3180212	TuG1812G0500000030.01	TuG1812G0500000030.01.T01	TC247384	85.575	513	33	18	1	478	1223	1729	1.67e-140	499	0.206822	0.692913	NA	1.07392	0.848877	0.487243	-4.83507	-1.44318	0	-0.931165	-1.17803	-2.05236
5A	3180212	TuG1812G0500000030.01	TuG1812G0500000030.01.T01	TC369512	87.747	506	32	12	1	490	1226	1717	5.84e-160	564	2.06822	1.73228	0.686067	1.07392	4.75371	0	-0.483507	-0.577273	-1.45758	-0.931165	-0.210362	NA
5A	3180212	TuG1812G0500000030.01	TuG1812G0500000030.01.T01	TC370071	88.298	470	27	7	1	456	1283	1738	3.54e-152	538	3.10233	1.15485	NA	NA	NA	0.243622	-0.322338	-0.86591	NA	NA	0	-4.10473
5A	3180212	TuG1812G0500000030.01	TuG1812G0500000030.01.T02	TC392754	89.824	511	37	15	1	496	692	1202	0	641	1.03411	NA	NA	NA	0	NA	-0.967014	NA	0	NA	NA	0
5A	3180212	TuG1812G0500000030.01	TuG1812G0500000030.01.T01	comp319_c0_seq1	91.333	450	23	7	18	461	1299	1738	4.1e-171	601	0.840363	0.946192	1.1937	1.01448	1.07483	1.15368	-1.18996	-1.05687	-0.837734	-0.985723	-0.930381	-0.866791
5A	3234977	TuG1812G0500000032.01	TuG1812G0500000032.01.T01	comp15350_c0_seq1	98.857	350	4	0	1	350	1413	1762	2.14e-178	625	0.875017	2.15573	1.35102	0.756042	0.601205	1.56909	-1.14283	-0.46388	-0.74018	-1.32268	-1.66333	-0.637313
5A	3234977	TuG1812G0500000032.01	TuG1812G0500000032.01.T01	comp15350_c0_seq2	90.21	143	13	1	1	142	1492	1634	2.16e-46	185	1.37882	1.03937	1.64656	1.4319	1.58457	2.43622	-0.72526	-0.962122	-0.607327	-0.698374	-0.631086	-0.410473
5A	3239874	TuG1812G0500000034.01	TuG1812G0500000034.01.T01	comp20275_c0_seq1	99.497	199	1	0	1	199	199	1	1.57e-99	363	3.10233	4.7844	0.886609	0.981873	0.289861	0.801387	-0.322338	-0.209013	-1.12789	-1.01846	-3.44993	-1.24784
5A	3249008	TuG1812G0500000035.01	TuG1812G0500000035.01.T01	TC368623	94.589	499	23	2	2	499	585	90	0	769	13.4434	NA	NA	0.781035	0	0.609054	-0.0743857	0	0	-1.28035	NA	-1.64189
5A	3249008	TuG1812G0500000035.01	TuG1812G0500000035.01.T01	TC422581	92.231	502	36	3	1	500	522	22	0	708	17.2805	24.4719	0.744551	0.890098	0.291955	1.68604	-0.0578685	-0.0408632	-1.34309	-1.12347	-3.42519	-0.593106
5A	3249008	TuG1812G0500000035.01	TuG1812G0500000035.01.T01	TC433437	93.548	496	26	6	4	497	498	7	0	743	4.90464	6.54418	0.29829	1.06741	0.114272	1.80143	-0.203888	-0.152808	-3.35244	-0.936843	-8.75105	-0.555115
5A	3249008	TuG1812G0500000035.01	TuG1812G0500000035.01.T01	comp20238_c0_seq1	91.906	383	26	5	1	381	404	25	4.44e-150	531	9.49166	42.7296	0.656238	1.9092	0.165827	3.36771	-0.105356	-0.023403	-1.52384	-0.523781	-6.03037	-0.296938
5A	3598721	TuG1812G0500000039.01	TuG1812G0500000039.01.T01	comp12818_c0_seq1	93.048	187	6	3	177	363	3131	2952	1.31e-70	267	2.33414	1.97005	1.24145	0.823006	0.735694	0.987655	-0.428424	-0.507602	-0.805507	-1.21506	-1.35926	-1.0125
5A	4488068	TuG1812G0500000050.01	TuG1812G0500000050.01.T04	CJ629812	96.011	351	14	0	1	351	559	909	3.49e-162	571	NA	NA	NA	0	0.594214	1.21811	NA	NA	NA	NA	-1.68289	-0.820945
5A	4488068	TuG1812G0500000050.01	TuG1812G0500000050.01.T03	TC262703	97.8	500	10	1	1	500	2501	2999	0	861	0.517056	0.911727	0.673593	0.920505	0.826733	0.837449	-1.93403	-1.09682	-1.48458	-1.08636	-1.20958	-1.1941
5A	4488068	TuG1812G0500000050.01	TuG1812G0500000050.01.T02	TC390448	97.012	502	10	5	1	500	2840	3338	0	846	1.10798	1.31983	0.686067	1.17155	0.594214	1.21811	-0.902546	-0.757671	-1.45758	-0.853568	-1.68289	-0.820945
5A	4488068	TuG1812G0500000050.01	TuG1812G0500000050.01.T03	TC406026	97.018	503	9	6	1	500	2583	3082	0	841	0.9307	0.673665	0.503115	0.704762	0.676175	0.906499	-1.07446	-1.48442	-1.98762	-1.41892	-1.47891	-1.10315
5A	4488068	TuG1812G0500000050.01	TuG1812G0500000050.01.T03	comp13881_c0_seq1	98.855	262	3	0	84	345	3151	2890	4.46e-131	468	0.978213	1.04987	0.86661	0.920505	0.806434	1.01923	-1.02227	-0.952501	-1.15392	-1.08636	-1.24003	-0.98113
5A	4488068	TuG1812G0500000050.01	TuG1812G0500000050.01.T02	comp24902_c0_seq1	99.038	208	2	0	1	208	2886	3093	4.09e-103	374	3.10233	0.256634	0.0914755	0.429569	1.58457	4.87243	-0.322338	-3.89659	-10.9319	-2.32791	-0.631086	-0.205236
5A	4494050	TuG1812G0500000051.01	TuG1812G0500000051.01.T01	TC396120	99.8	500	1	0	1	500	1869	2368	0	918	1.79246	1.90211	2.01246	0.954598	0.62005	1.50472	-0.557893	-0.525731	-0.496904	-1.04756	-1.61277	-0.664575
5A	4494050	TuG1812G0500000051.01	TuG1812G0500000051.01.T01	comp20411_c0_seq3	97.297	111	3	0	1	111	2430	2540	9.34e-48	189	0	0	NA	2.14785	0	0.812072	NA	NA	0	-0.465583	NA	-1.23142
5A	4494050	TuG1812G0500000051.01	TuG1812G0500000051.01.T01	comp6097_c0_seq1	98.175	274	2	1	1	274	2127	2397	1.47e-133	475	2.16442	1.16877	1.3852	0.80326	1.20729	1.19273	-0.462018	-0.855602	-0.721917	-1.24493	-0.8283	-0.838412
5A	4690788	TuG1812G0500000052.01	TuG1812G0500000052.01.T01	TC393505	99.4	500	2	1	1	500	599	101	0	905	NA	0.461942	NA	3.22177	0.594214	1.21811	0	-2.16477	0	-0.310388	-1.68289	-0.820945
5A	4842468	TuG1812G0500000059.01	TuG1812G0500000059.01.T01	TC395795	97.992	498	8	2	1	498	427	922	0	863	NA	0	NA	0	1.18843	1.21811	0	NA	0	NA	-0.841447	-0.820945
5A	4842468	TuG1812G0500000059.01	TuG1812G0500000059.01.T01	TC415658	96.646	477	7	2	1	468	1936	2412	0	784	0.443191	8.08398	0.891886	0.805442	0.475371	0.696062	-2.25637	-0.123701	-1.12122	-1.24155	-2.10362	-1.43665
5A	4842468	TuG1812G0500000059.01	TuG1812G0500000059.01.T01	comp45850_c0_seq1	99.065	107	1	0	1	107	2160	2266	5.62e-49	193	1.03411	NA	NA	0	0	1.21811	-0.967014	NA	NA	NA	NA	-0.820945
5A	5092796	TuG1812G0500000060.01	TuG1812G0500000060.01.T01	AJ481419	96.8	500	16	0	1	500	1084	1583	0	835	NA	NA	NA	4.29569	NA	0	0	NA	0	-0.232791	NA	NA
5A	5092796	TuG1812G0500000060.01	TuG1812G0500000060.01.T01	TC377822	96.643	417	1	2	1	405	1992	2407	0	680	1.03411	1.15485	NA	0.536962	NA	0	-0.967014	-0.86591	0	-1.86233	0	NA
5A	5092796	TuG1812G0500000060.01	TuG1812G0500000060.01.T01	TC379368	86.239	327	25	20	1	326	1908	2215	1.39e-91	337	NA	NA	NA	2.14785	NA	NA	NA	NA	NA	-0.465583	NA	0
5A	5092796	TuG1812G0500000060.01	TuG1812G0500000060.01.T01	comp2979_c0_seq1	95.105	143	1	1	1	137	2265	2407	8.86e-57	220	1.30835	1.5501	0.884833	0.904053	1.00245	1.07997	-0.764321	-0.64512	-1.13016	-1.10613	-0.997553	-0.92595
5A	5095072	TuG1812G0500000061.01	TuG1812G0500000061.01.T01	TC272451	91.892	222	11	5	36	256	887	1102	9.2e-82	303	1.37882	0.461942	0.548853	1.07392	0	0.730865	-0.72526	-2.16477	-1.82198	-0.931165	NA	-1.36824
5A	5095072	TuG1812G0500000061.01	TuG1812G0500000061.01.T01	comp1262_c0_seq1	96.142	337	6	2	1	337	932	1261	5.33e-154	544	0.302921	0.0640438	0.106367	0.0824283	0.0619896	0.144277	-3.30119	-15.6143	-9.40142	-12.1318	-16.1317	-6.93112
5A	5347280	TuG1812G0500000063.01	TuG1812G0500000063.01.T01	comp11301_c0_seq1	97.222	108	3	0	1	108	1360	1467	1.63e-45	183	2.23501	1.73228	0.887313	0.905465	0.660238	1.32134	-0.447424	-0.577273	-1.127	-1.10441	-1.51461	-0.756809
5A	5438297	TuG1812G0500000064.01	TuG1812G0500000064.01.T01	comp5595_c0_seq1	99.659	293	0	1	1	293	1597	1888	2.81e-151	534	0.988151	1.01181	1.14864	1.26304	1.34021	0.990261	-1.01199	-0.988328	-0.870594	-0.79174	-0.746151	-1.00984
5A	5444576	TuG1812G0500000065.01	TuG1812G0500000065.01.T01	comp13239_c0_seq1	96	75	3	0	1	75	169	243	3.39e-27	122	1.82958	1.60189	1.84258	0.942957	0.933765	1.1572	-0.546573	-0.624261	-0.542718	-1.06049	-1.07093	-0.864153
5A	5592498	TuG1812G0500000068.01	TuG1812G0500000068.01.T01	comp21534_c0_seq1	78.367	245	16	14	1	232	921	1141	5.14e-28	124	0.689408	0.461942	0.457378	1.19325	1.58457	0.852676	-1.45052	-2.16477	-2.18638	-0.838049	-0.631086	-1.17278
5A	5592498	TuG1812G0500000068.01	TuG1812G0500000068.01.T01	comp4726_c0_seq1	85.153	229	28	6	32	260	1143	921	1.66e-59	230	0.636376	0.508136	1.79902	0.859138	1.38189	1.14353	-1.5714	-1.96798	-0.555859	-1.16396	-0.723645	-0.874485
5A	5767992	TuG1812G0500000070.01	TuG1812G0500000070.01.T01	CA643665	92.581	310	13	8	192	499	3064	3365	1.33e-121	436	1.55117	1.73228	2.74427	0.758063	2.73339	0.893279	-0.644676	-0.577273	-0.364396	-1.31915	-0.365847	-1.11947
5A	5767992	TuG1812G0500000070.01	TuG1812G0500000070.01.T01	CD863291	96.078	255	6	2	78	331	3059	3310	1.82e-114	412	0.827289	1.02654	0.603739	1.71828	0.713057	2.13169	-1.20877	-0.974149	-1.65635	-0.581978	-1.40241	-0.469112
5A	5767992	TuG1812G0500000070.01	TuG1812G0500000070.01.T01	CD920961	90.323	403	29	3	103	500	3074	3471	1.28e-146	520	0	0	0.274427	0	0	0	NA	NA	-3.64396	NA	NA	NA
5A	5767992	TuG1812G0500000070.01	TuG1812G0500000070.01.T01	TC383726	92.048	415	13	8	89	500	3074	3471	1.62e-160	566	0.965171	1.77078	0.695214	0.908704	1.31137	1.57903	-1.03609	-0.564724	-1.43841	-1.10047	-0.762562	-0.633301
5A	5767992	TuG1812G0500000070.01	TuG1812G0500000070.01.T01	TC390834	98.218	505	2	5	1	500	2855	3357	0	876	1.72352	1.15485	4.93968	0.511392	0.685632	1.66106	-0.580208	-0.86591	-0.202442	-1.95545	-1.45851	-0.602026
5A	5767992	TuG1812G0500000070.01	TuG1812G0500000070.01.T01	TC412309	94.92	374	14	3	128	500	3074	3443	5.8e-165	580	1.03411	6.92913	1.37213	2.14785	1.78264	2.43622	-0.967014	-0.144318	-0.728792	-0.465583	-0.560965	-0.410473
5A	5767992	TuG1812G0500000070.01	TuG1812G0500000070.01.T01	TC440643	91.811	403	24	4	69	466	3074	3472	1.26e-156	553	0	1.15485	NA	2.14785	1.18843	1.62414	NA	-0.86591	0	-0.465583	-0.841447	-0.615709
5A	5767992	TuG1812G0500000070.01	TuG1812G0500000070.01.T01	TC455141	87.261	314	34	3	112	422	3053	3363	1.38e-96	353	2.48187	6.15922	2.28689	4.60253	5.14986	6.57778	-0.402922	-0.162358	-0.437275	-0.217272	-0.19418	-0.152027
5A	5767992	TuG1812G0500000070.01	TuG1812G0500000070.01.T01	comp11903_c0_seq2	86.567	134	12	2	3	130	3337	3470	7.92e-34	143	0.861759	1.15485	1.37213	1.19325	0.633828	5.27847	-1.16042	-0.86591	-0.728792	-0.838049	-1.57771	-0.189449
5A	5767992	TuG1812G0500000070.01	TuG1812G0500000070.01.T01	comp7657_c0_seq1	87.978	183	21	1	2	183	3137	3319	4.58e-55	215	1.84663	1.37837	0.960493	0.811409	1.15715	1.09927	-0.541528	-0.725492	-1.04113	-1.23242	-0.864189	-0.909696
5A	5767992	TuG1812G0500000070.01	TuG1812G0500000070.01.T01	comp7657_c0_seq6	87.978	183	21	1	2	183	3137	3319	2.53e-55	215	0.775583	0.769903	NA	2.14785	1.78264	3.65432	-1.28935	-1.29886	0	-0.465583	-0.560965	-0.273648
5A	5784122	TuG1812G0500000071.01	TuG1812G0500000071.01.T01	GR305049	95.031	161	8	0	9	169	215	375	1.44e-66	254	NA	0	NA	0	1.18843	NA	NA	NA	NA	NA	-0.841447	NA
5A	5784122	TuG1812G0500000071.01	TuG1812G0500000071.01.T01	comp29769_c0_seq1	97.98	99	2	0	1	99	284	382	1.79e-42	172	NA	1.15485	2.19541	0	0.950743	1.82716	0	-0.86591	-0.455495	NA	-1.05181	-0.547297
5A	5932255	TuG1812G0500000073.01	TuG1812G0500000073.01.T01	TC399716	96.393	499	16	2	1	499	2273	1777	0	828	1.03411	NA	NA	NA	0	1.21811	-0.967014	0	NA	NA	NA	-0.820945
5A	5932255	TuG1812G0500000073.01	TuG1812G0500000073.01.T01	TC423337	89.62	395	17	9	1	394	1775	1404	6.05e-135	481	NA	NA	0.82328	2.14785	0	2.74074	0	0	-1.21465	-0.465583	NA	-0.364865
5A	5932255	TuG1812G0500000073.01	TuG1812G0500000073.01.T01	comp1923_c0_seq1	92.407	540	22	8	57	596	1404	1924	0	752	3.10233	3.18151	0.683535	0.476759	0.817164	1.24454	-0.322338	-0.314316	-1.46298	-2.0975	-1.22374	-0.803509
5A	6362628	TuG1812G0500000085.01	TuG1812G0500000085.01.T01	CA643150	98.513	269	3	1	1	269	1680	1413	5.24e-133	473	0.846091	2.05307	1.37213	0	0.792286	0.609054	-1.18191	-0.487074	-0.728792	NA	-1.26217	-1.64189
5A	6362628	TuG1812G0500000085.01	TuG1812G0500000085.01.T01	TC257818	93.4	500	25	8	1	500	886	1377	0	736	NA	1.15485	NA	0	0.792286	0.609054	0	-0.86591	0	NA	-1.26217	-1.64189
5A	6362628	TuG1812G0500000085.01	TuG1812G0500000085.01.T01	TC369114	91.194	511	21	22	1	500	571	1068	0	673	1.03411	2.30971	0.548853	NA	0.792286	NA	-0.967014	-0.432955	-1.82198	NA	-1.26217	NA
5A	6362628	TuG1812G0500000085.01	TuG1812G0500000085.01.T01	TC381545	97.154	492	14	0	1	492	3356	3847	0	832	1.569	1.27515	1.17842	1.10748	1.02451	1.42457	-0.63735	-0.78422	-0.848594	-0.902948	-0.976079	-0.701968
5A	6362628	TuG1812G0500000085.01	TuG1812G0500000085.01.T01	TC390367	96.378	497	16	2	1	497	1029	1523	0	817	NA	1.15485	NA	2.14785	1.18843	NA	NA	-0.86591	0	-0.465583	-0.841447	0
5A	6362628	TuG1812G0500000085.01	TuG1812G0500000085.01.T01	comp24059_c0_seq1	100	193	0	0	1	193	1321	1513	3.79e-98	357	1.03411	1.34733	NA	1.07392	1.3865	1.01509	-0.967014	-0.742209	0	-0.931165	-0.721241	-0.985134
5A	6380340	TuG1812G0500000087.01	TuG1812G0500000087.01.T01	TC402924	96.429	504	13	2	1	500	131	633	0	826	NA	2.30971	NA	0	0.792286	0.406036	NA	-0.432955	0	NA	-1.26217	-2.46284
5A	6579544	TuG1812G0500000094.01	TuG1812G0500000094.01.T01	TC390714	94.79	499	18	2	1	493	1235	1731	0	771	NA	1.15485	NA	NA	0	1.21811	NA	-0.86591	NA	NA	NA	-0.820945
5A	6579544	TuG1812G0500000094.01	TuG1812G0500000094.01.T01	comp4874_c0_seq1	97.97	394	7	1	15	408	1341	1733	0	682	0.441652	0.387342	1.08399	0.247097	0.562381	0.623218	-2.26423	-2.58169	-0.922522	-4.04699	-1.77815	-1.60457
5A	7344088	TuG1812G0500000106.01	TuG1812G0500000106.01.T01	TC251357	92.057	491	24	7	1	483	2286	2769	0	676	1.80969	1.51575	0.525984	0.942957	0.231888	0.966086	-0.552579	-0.659741	-1.9012	-1.06049	-4.31242	-1.0351
5A	7344088	TuG1812G0500000106.01	TuG1812G0500000106.01.T01	TC368813	99.16	476	4	0	1	476	2313	2788	0	857	0.940101	1.92476	0.891886	0.429569	0.475371	2.67984	-1.06372	-0.519546	-1.12122	-2.32791	-2.10362	-0.373157
5A	7344088	TuG1812G0500000106.01	TuG1812G0500000106.01.T01	TC431896	94.177	498	14	15	1	484	1411	1907	0	745	NA	NA	NA	2.14785	0	NA	NA	NA	NA	-0.465583	NA	NA
5A	7344088	TuG1812G0500000106.01	TuG1812G0500000106.01.T01	comp12315_c0_seq1	98.964	386	3	1	45	429	2793	2408	0	689	1.60085	1.38875	0.926771	0.687518	0.528637	1.46911	-0.624669	-0.720072	-1.07901	-1.45451	-1.89166	-0.680683
5A	7634663	TuG1812G0500000109.01	TuG1812G0500000109.01.T01	TC450529	93.646	362	20	3	1	361	360	1	3.54e-152	538	0.689408	5.00437	0.82328	0.859138	1.3865	6.09054	-1.45052	-0.199825	-1.21465	-1.16396	-0.721241	-0.164189
5A	7634663	TuG1812G0500000109.01	TuG1812G0500000109.01.T01	comp34750_c0_seq1	86.792	159	18	1	1	156	477	635	3.22e-43	174	0.517056	0	NA	0	NA	NA	-1.93403	NA	NA	NA	NA	NA
5A	7674802	TuG1812G0500000110.01	TuG1812G0500000110.01.T01	TC411049	99.2	500	3	1	1	500	2564	3062	0	900	2.06822	4.23447	4.1164	NA	9.50743	3.04527	-0.483507	-0.236157	-0.242931	0	-0.105181	-0.328378
5A	7674802	TuG1812G0500000110.01	TuG1812G0500000110.01.T01	comp1531_c0_seq1	97.485	676	15	1	4	679	3401	2728	0	1153	2.96307	2.4014	10.9218	5.59974	28.0559	2.54968	-0.337488	-0.416425	-0.09156	-0.17858	-0.0356431	-0.392207
5A	8043886	TuG1812G0500000116.01	TuG1812G0500000116.01.T01	comp12511_c0_seq1	88.462	52	2	2	176	227	1219	1266	2.16e-08	60.2	0	0	0	0	0	0.270691	NA	NA	NA	NA	NA	-3.69425
5A	8048347	TuG1812G0500000118.01	TuG1812G0500000118.01.T01	TC406222	85.075	67	10	0	17	83	241	175	5.58e-11	69.4	0	0	0.82328	0	2.37686	0	NA	NA	-1.21465	NA	-0.420724	NA
5A	8251981	TuG1812G0500000122.01	TuG1812G0500000122.01.T01	TC368611	99	500	4	1	1	500	1234	1732	0	894	4.8751	1.78478	1.09771	0.299699	0.265833	3.74133	-0.205124	-0.560295	-0.91099	-3.33668	-3.76176	-0.267284
5A	8251981	TuG1812G0500000122.01	TuG1812G0500000122.01.T01	comp25034_c0_seq1	98.734	237	2	1	1	237	1496	1731	6.34e-117	420	4.92094	2.94606	0.51199	0.624091	0.249607	1.92957	-0.203213	-0.339437	-1.95316	-1.60233	-4.00629	-0.51825
5A	8471075	TuG1812G0500000132.01	TuG1812G0500000132.01.T01	comp15399_c0_seq1	97.143	35	1	0	319	353	1687	1721	3.28e-08	60.2	0.319634	1.6168	0.0633292	0.153418	0.0300868	0.541381	-3.12857	-0.618507	-15.7905	-6.51816	-33.2372	-1.84713
5A	8493447	TuG1812G0500000134.01	TuG1812G0500000134.01.T01	TC409555	97.416	387	4	1	1	387	620	1000	0	654	0	0.384951	NA	0	0	2.43622	NA	-2.59773	0	NA	NA	-0.410473
5A	8493447	TuG1812G0500000134.01	TuG1812G0500000134.01.T01	TC456890	96.897	419	12	1	1	419	749	1166	0	701	1.49456	1.86414	0.659587	0.952347	0.575987	1.08679	-0.669095	-0.536442	-1.5161	-1.05004	-1.73615	-0.920143
5A	8493447	TuG1812G0500000134.01	TuG1812G0500000134.01.T01	comp9669_c0_seq2	98.361	305	5	0	1	305	781	1085	7.5e-152	536	1.3523	1.62793	0.645958	0.845833	0.55377	1.2837	-0.739481	-0.614278	-1.54809	-1.18227	-1.8058	-0.778999
5A	8534783	TuG1812G0500000136.01	TuG1812G0500000136.01.T01	comp9767_c0_seq1	98.242	455	5	2	1	453	4928	5381	0	793	1.4018	1.65425	0.976773	0.595692	0.670697	0.903382	-0.713371	-0.604503	-1.02378	-1.67872	-1.49099	-1.10695
5A	8541500	TuG1812G0500000137.01	TuG1812G0500000137.01.T01	TC257548	89.27	466	37	11	1	460	391	849	3.49e-162	571	NA	NA	1.64656	2.14785	1.18843	4.87243	0	0	-0.607327	-0.465583	-0.841447	-0.205236
5A	8541500	TuG1812G0500000137.01	TuG1812G0500000137.01.T01	TC454174	96.2	500	18	1	1	500	358	856	0	828	NA	0	NA	0	NA	1.21811	NA	NA	NA	NA	NA	-0.820945
5A	8960276	TuG1812G0500000145.01	TuG1812G0500000145.01.T01	TC436622	97.211	502	10	4	2	500	1174	1674	0	846	1.55117	0.824896	1.64656	0.536962	0.950743	0	-0.644676	-1.21227	-0.607327	-1.86233	-1.05181	NA
5A	8960276	TuG1812G0500000145.01	TuG1812G0500000145.01.T01	comp6792_c0_seq1	99.071	323	3	0	98	420	1673	1351	4.82e-165	580	1.32957	0.992362	1.45853	0.648607	1.01335	1.08107	-0.752122	-1.0077	-0.685623	-1.54177	-0.986828	-0.925009
5A	8987258	TuG1812G0500000146.01	TuG1812G0500000146.01.T01	comp10697_c0_seq1	98.48	329	5	0	2	330	435	763	5.06e-165	580	5.18218	15.2331	0.569032	0.504904	0.198071	1.12441	-0.192969	-0.0656466	-1.75737	-1.98057	-5.04868	-0.889357
5A	9142623	TuG1812G0500000149.01	TuG1812G0500000149.01.T01	comp8214_c0_seq1	96.285	323	12	0	38	360	1011	689	4.18e-150	531	1.40105	0.911052	1.5497	0.692854	0.909512	0.915804	-0.713748	-1.09763	-0.645285	-1.44331	-1.09949	-1.09194
5A	9146677	TuG1812G0500000150.01	TuG1812G0500000150.01.T01	TC262553	89.178	499	39	9	1	488	1221	1715	2.66e-173	608	NA	NA	NA	2.14785	0	NA	NA	NA	NA	-0.465583	NA	NA
5A	9146677	TuG1812G0500000150.01	TuG1812G0500000150.01.T01	TC395605	96.208	501	17	2	1	500	1216	1715	0	819	NA	2.30971	0.137213	0	1.18843	1.21811	0	-0.432955	-7.28792	NA	-0.841447	-0.820945
5A	9146677	TuG1812G0500000150.01	TuG1812G0500000150.01.T01	comp5020_c0_seq1	98.072	415	8	0	19	433	1702	1288	0	723	1.21724	1.08035	0.632013	0.976294	0.714289	1.0423	-0.821534	-0.925628	-1.58225	-1.02428	-1.39999	-0.959418
5A	9222749	TuG1812G0500000152.01	TuG1812G0500000152.01.T01	comp10054_c0_seq1	88.542	192	9	4	1	191	248	69	2.2e-56	220	0.992747	2.23864	1.75211	1.27023	0.940839	1.18605	-1.00731	-0.4467	-0.570741	-0.787258	-1.06288	-0.843133
5A	9497233	TuG1812G0500000159.01	TuG1812G0500000159.01.T01	comp16628_c0_seq1	98.675	151	2	0	163	313	176	26	3.12e-71	268	0.723878	0.524934	1.37213	0.585776	1.06333	0.812072	-1.38145	-1.905	-0.728792	-1.70714	-0.940441	-1.23142
5A	9684106	TuG1812G0500000164.01	TuG1812G0500000164.01.T01	TC428481	96.31	271	10	0	147	417	105	375	1.86e-124	446	4.61373	13.4733	0.960493	1.78987	0.880317	0.963155	-0.216744	-0.0742209	-1.04113	-0.558699	-1.13595	-1.03825
5A	9775161	TuG1812G0500000167.01	TuG1812G0500000167.01.T01	comp11241_c0_seq1	98.925	279	3	0	1	279	1009	1287	9.98e-141	499	1.42951	0.878694	1.26759	0.609091	0.792286	1.17682	-0.699542	-1.13805	-0.788899	-1.64179	-1.26217	-0.84975
5A	10201758	TuG1812G0500000170.01	TuG1812G0500000170.01.T01	comp4237_c0_seq1	97.561	164	4	0	587	750	2921	2758	1e-74	281	0.501698	0.644678	0.520562	0.66216	0.588555	0.524037	-1.99323	-1.55116	-1.921	-1.51021	-1.69908	-1.90826
5A	10796676	TuG1812G0500000175.01	TuG1812G0500000175.01.T01	TC429906	81.846	325	37	17	1	309	330	648	1.18e-66	254	0	0	NA	NA	1.18843	0	NA	NA	0	0	-0.841447	NA
5A	10796676	TuG1812G0500000175.01	TuG1812G0500000175.01.T01	comp8599_c0_seq1	91.083	314	18	4	1	305	408	720	1.14e-115	416	1.24444	1.19685	1.18918	0.698902	0.843401	1.25617	-0.803575	-0.835527	-0.840914	-1.43082	-1.18568	-0.796068
5A	10801638	TuG1812G0500000176.01	TuG1812G0500000176.01.T01	TC370175	92.182	307	15	5	1	299	575	880	2.87e-118	425	NA	NA	NA	NA	1.18843	NA	NA	NA	NA	NA	-0.841447	NA
5A	10801638	TuG1812G0500000176.01	TuG1812G0500000176.01.T01	TC371439	96.573	321	11	0	1	321	652	972	1.65e-150	532	0.435415	0.593925	NA	2.86379	14.2611	0.721842	-2.29666	-1.68371	0	-0.349187	-0.0701206	-1.38534
5A	10801638	TuG1812G0500000176.01	TuG1812G0500000176.01.T01	comp4325_c0_seq1	91.948	385	31	0	116	500	972	588	9.86e-153	540	0.582166	0.828483	5.93184	1.57661	2.2316	1.63504	-1.71772	-1.20703	-0.168582	-0.634272	-0.448108	-0.611604
5A	10811953	TuG1812G0500000177.01	TuG1812G0500000177.01.T01	TC399363	98.514	471	6	1	1	471	530	999	0	830	0.443191	0.521547	3.56755	3.22177	2.05994	1.78656	-2.25637	-1.91737	-0.280305	-0.310388	-0.48545	-0.559735
5A	10811953	TuG1812G0500000177.01	TuG1812G0500000177.01.T01	comp16677_c0_seq1	97.842	139	2	1	1	139	720	857	9.74e-63	239	0.517056	0.808398	NA	2.14785	0.594214	4.87243	-1.93403	-1.23701	0	-0.465583	-1.68289	-0.205236
5A	10879630	TuG1812G0500000180.01	TuG1812G0500000180.01.T01	TC397253	92.042	289	14	1	1	280	380	668	6.26e-110	398	2.75763	4.74774	34.0289	NA	104.582	10.4216	-0.36263	-0.210627	-0.0293868	0	-0.0095619	-0.0959546
5A	10879630	TuG1812G0500000180.01	TuG1812G0500000180.01.T01	comp49085_c0_seq1	100	58	0	0	1	58	611	668	2.32e-23	108	NA	2.30971	NA	NA	NA	NA	0	-0.432955	0	0	0	0
5A	10930779	TuG1812G0500000181.01	TuG1812G0500000181.01.T01	comp14056_c0_seq1	95.595	227	7	1	1	227	3218	2995	3.52e-99	361	1.03411	0.629921	1.74947	0.998998	0.583003	1.47455	-0.967014	-1.5875	-0.571602	-1.001	-1.71526	-0.678172
5A	10930779	TuG1812G0500000181.01	TuG1812G0500000181.01.T01	comp17961_c0_seq1	95.833	312	9	3	1	312	3017	2710	2.8e-141	501	2.58528	0.384951	0.640329	1.07392	0.731341	1.1166	-0.386806	-2.59773	-1.5617	-0.931165	-1.36735	-0.895577
5A	10937690	TuG1812G0500000182.01	TuG1812G0500000182.01.T01	TC404157	91.616	489	36	4	10	496	2308	2793	0	671	1.03411	NA	NA	NA	NA	NA	-0.967014	NA	NA	NA	NA	NA
5A	11827978	TuG1812G0500000187.01	TuG1812G0500000187.01.T01	TC373453	95.556	495	19	2	1	494	3042	3534	0	789	0.517056	NA	NA	0	2.37686	0.913581	-1.93403	0	0	NA	-0.420724	-1.09459
5A	11827978	TuG1812G0500000187.01	TuG1812G0500000187.01.T01	TC408131	99.2	500	4	0	1	500	3034	3533	0	902	1.55117	1.53981	0.686067	0	1.18843	2.43622	-0.644676	-0.649432	-1.45758	NA	-0.841447	-0.410473
5A	11838594	TuG1812G0500000189.01	TuG1812G0500000189.01.T01	TC394784	98.907	366	4	0	93	458	236	601	0	654	NA	NA	NA	2.14785	NA	NA	NA	0	0	-0.465583	0	0
5A	11922608	TuG1812G0500000191.01	TuG1812G0500000191.01.T01	comp5351_c0_seq1	97.101	414	10	2	1	412	725	1138	0	697	0.298435	0.0870493	0.041164	0.0159494	0.0163921	0.0864929	-3.35082	-11.4877	-24.2931	-62.6985	-61.0049	-11.5616
5A	11938256	TuG1812G0500000192.01	TuG1812G0500000192.01.T01	TC266316	95.156	289	12	1	1	287	901	1189	3.67e-127	455	NA	0.577427	NA	NA	NA	3.65432	NA	-1.73182	NA	0	NA	-0.273648
5A	11938256	TuG1812G0500000192.01	TuG1812G0500000192.01.T01	comp1562_c0_seq1	94.242	330	9	3	64	388	1429	1105	1.65e-139	496	2.16283	1.73228	0.747493	0.603082	0.59951	1.56289	-0.462357	-0.577273	-1.3378	-1.65815	-1.66803	-0.639841
5A	11943053	TuG1812G0500000193.01	TuG1812G0500000193.01.T01	TC383884	99.002	501	3	2	1	499	1309	1809	0	896	1.22035	1.14311	1.22281	0.856503	1.07376	1.03596	-0.819437	-0.874806	-0.817787	-1.16754	-0.931311	-0.965287
5A	11943053	TuG1812G0500000193.01	TuG1812G0500000193.01.T01	comp503_c0_seq1	94.833	329	12	2	2	325	1830	1502	1.75e-143	508	1.32395	1.22936	1.35494	0.793568	1.03003	0.838557	-0.755316	-0.813431	-0.73804	-1.26013	-0.970848	-1.19252
5A	12059472	TuG1812G0500000194.01	TuG1812G0500000194.01.T01	TC371565	86.179	246	18	8	1	246	2822	3051	5.16e-66	252	2.06822	0.866141	NA	NA	0	1.21811	-0.483507	-1.15455	NA	0	NA	-0.820945
5A	12059472	TuG1812G0500000194.01	TuG1812G0500000194.01.T01	comp12606_c0_seq1	89.724	399	28	7	1	399	2761	3146	5.23e-140	497	1.57838	1.9007	0.794891	0.932084	0.594214	0.774006	-0.633561	-0.526123	-1.25803	-1.07286	-1.68289	-1.29198
5A	12232654	TuG1812G0500000195.01	TuG1812G0500000195.01.T02	CX628086	96.717	396	13	0	1	396	644	1039	0	660	NA	0	NA	2.14785	NA	NA	NA	NA	0	-0.465583	NA	NA
5A	12232654	TuG1812G0500000195.01	TuG1812G0500000195.01.T01	comp2923_c0_seq1	96.451	479	11	3	37	511	1798	1322	0	785	1.04083	0.965287	1.38913	0.975744	1.19651	0.977287	-0.960769	-1.03596	-0.719877	-1.02486	-0.835766	-1.02324
5A	12433030	TuG1812G0500000196.01	TuG1812G0500000196.01.T02	TC406508	98.597	499	7	0	1	499	830	1328	0	883	1.24955	0.731408	1.15259	0.966531	1.05995	1.18605	-0.800287	-1.36723	-0.86761	-1.03463	-0.943441	-0.843133
5A	12488984	TuG1812G0500000197.01	TuG1812G0500000197.01.T01	comp10428_c0_seq1	98.313	415	6	1	1	415	1896	1483	0	726	1.24702	1.12186	1.15984	0.796904	0.898568	0.983226	-0.801914	-0.891378	-0.862187	-1.25486	-1.11288	-1.01706
5A	12488984	TuG1812G0500000197.01	TuG1812G0500000197.01.T04	comp38615_c0_seq1	98.77	244	3	0	13	256	1731	1488	2.33e-121	435	0.517056	0	0.82328	0.536962	0.509326	0	-1.93403	NA	-1.21465	-1.86233	-1.96338	NA
5A	12488984	TuG1812G0500000197.01	TuG1812G0500000197.01.T04	comp42478_c0_seq1	96.337	273	10	0	3	275	1101	829	8.98e-126	449	0.258528	0	NA	1.07392	0.594214	2.43622	-3.86806	NA	0	-0.931165	-1.68289	-0.410473
5A	12613905	TuG1812G0500000198.01	TuG1812G0500000198.01.T01	comp3544_c0_seq1	94.161	274	4	2	1	273	595	857	9.62e-113	407	0.965171	2.09974	2.19541	0.781035	1.18843	1.37037	-1.03609	-0.47625	-0.455495	-1.28035	-0.841447	-0.729729
5A	12615292	TuG1812G0500000199.01	TuG1812G0500000199.01.T01	TC398471	98.597	499	4	1	1	496	500	998	0	880	1.03411	0.866141	NA	3.57974	0.713057	1.08276	-0.967014	-1.15455	0	-0.27935	-1.40241	-0.923563
5A	12615292	TuG1812G0500000199.01	TuG1812G0500000199.01.T01	TC405394	96.57	379	5	1	1	379	626	996	3.41e-177	621	2.68869	1.29072	0.651763	0.282611	0.463777	0.64712	-0.371928	-0.774762	-1.5343	-3.53843	-2.15621	-1.54531
5A	12615292	TuG1812G0500000199.01	TuG1812G0500000199.01.T01	comp16_c0_seq1	96.487	427	3	1	20	446	584	998	0	695	1.279	1.06833	0.584363	0.705111	0.686872	0.623306	-0.781858	-0.936045	-1.71127	-1.41822	-1.45588	-1.60435
5A	12638990	TuG1812G0500000200.01	TuG1812G0500000200.01.T01	comp12701_c0_seq1	98.471	327	4	1	1	326	2280	1954	1.71e-163	575	0.904847	0.824896	0.744872	0.630346	0.821414	0.767575	-1.10516	-1.21227	-1.34251	-1.58643	-1.21741	-1.3028
5A	12638990	TuG1812G0500000200.01	TuG1812G0500000200.01.T01	comp17409_c0_seq1	97.03	202	6	0	2	203	1766	1967	4.04e-93	340	1.09494	1.15485	0.384197	1.12062	1.01865	0.964336	-0.913291	-0.86591	-2.60283	-0.892367	-0.981689	-1.03698
5A	12744788	TuG1812G0500000202.01	TuG1812G0500000202.01.T01	comp4571_c0_seq1	90.594	202	11	1	130	323	717	918	6.32e-69	261	1.68412	1.52555	1.22394	0.831424	1.00441	0.833705	-0.59378	-0.655502	-0.817032	-1.20276	-0.995606	-1.19946
5A	13613482	TuG1812G0500000209.01	TuG1812G0500000209.01.T01	TC412918	96.185	498	17	1	1	496	50	547	0	813	NA	1.73228	0.548853	NA	0.297107	1.21811	0	-0.577273	-1.82198	NA	-3.36579	-0.820945
5A	13613482	TuG1812G0500000209.01	TuG1812G0500000209.01.T01	comp8466_c0_seq1	91.608	286	14	7	1	286	219	494	7.48e-107	387	1.26914	1.43361	0.891886	0.569837	0.419445	1.1572	-0.787937	-0.697539	-1.12122	-1.75489	-2.3841	-0.864153
5A	13613482	TuG1812G0500000209.01	TuG1812G0500000209.01.T01	comp8466_c0_seq2	95.053	283	8	4	1	283	219	495	5.57e-123	440	1.68043	2.21347	1.6923	1.08863	1.14881	1.31795	-0.595085	-0.451779	-0.590913	-0.918582	-0.870463	-0.758752
5A	13613482	TuG1812G0500000209.01	TuG1812G0500000209.01.T01	comp8466_c0_seq3	87.402	254	23	5	1	247	394	645	9.59e-76	283	0.703196	0.846893	0.450844	0.888764	0.396143	0.862827	-1.42208	-1.18079	-2.21806	-1.12516	-2.52434	-1.15898
5A	13613482	TuG1812G0500000209.01	TuG1812G0500000209.01.T01	comp8466_c0_seq4	89.6	250	11	7	1	235	396	645	6.87e-82	303	1.37882	1.92476	3.56755	0.565223	1.35049	2.59863	-0.72526	-0.519546	-0.280305	-1.76921	-0.740474	-0.384818
5A	13670925	TuG1812G0500000211.01	TuG1812G0500000211.01.T01	comp27473_c0_seq1	97.033	337	10	0	1	337	1038	1374	2.96e-161	568	1.26391	1.44357	NA	1.53418	0.891321	1.33992	-0.791193	-0.692728	0	-0.651816	-1.12193	-0.746314
5A	13689712	TuG1812G0500000212.01	TuG1812G0500000212.01.T01	comp15565_c0_seq1	98.1	421	6	2	1	419	1431	1851	0	732	2.7876	2.99212	0.569963	0.959676	0.194029	1.32559	-0.358731	-0.334211	-1.7545	-1.04202	-5.15387	-0.754382
5A	13752499	TuG1812G0500000214.01	TuG1812G0500000214.01.T03	TC377624	96.2	500	12	3	1	500	1499	1991	0	811	1.00616	0.936957	0.939383	0.623568	0.857474	0.750889	-0.993875	-1.06728	-1.06453	-1.60367	-1.16622	-1.33176
5A	13752499	TuG1812G0500000214.01	TuG1812G0500000214.01.T03	TC419839	99.644	281	1	0	220	500	1777	1497	5.96e-145	514	1.768	1.8076	1.88668	0.85232	1.43366	1.19375	-0.565612	-0.55322	-0.530031	-1.17327	-0.697516	-0.837699
5A	13752499	TuG1812G0500000214.01	TuG1812G0500000214.01.T03	TC423093	94.563	515	12	3	1	500	1263	1776	0	782	1.44776	NA	2.46984	0.644354	0.848877	2.43622	-0.690724	0	-0.404885	-1.55194	-1.17803	-0.410473
5A	13752499	TuG1812G0500000214.01	TuG1812G0500000214.01.T03	comp21124_c0_seq1	99.095	221	2	0	1	221	1776	1996	2.86e-110	398	1.0182	1.17795	0.993424	0.54792	0.831284	0.858398	-0.982123	-0.848931	-1.00662	-1.82508	-1.20296	-1.16496
5A	13752499	TuG1812G0500000214.01	TuG1812G0500000214.01.T03	comp9497_c0_seq1	98.522	406	2	1	17	418	1799	1394	0	713	1.17276	0.957684	1.21604	0.752782	0.910433	1.20976	-0.852687	-1.04419	-0.822343	-1.32841	-1.09838	-0.826607
5A	14019463	TuG1812G0500000217.01	TuG1812G0500000217.01.T01	TC385584	98.988	494	4	1	1	493	1881	2374	0	883	1.34051	0.943402	1.05197	1.11604	1.13839	1.16324	-0.745982	-1.05999	-0.950599	-0.896027	-0.878434	-0.859669
5A	14019463	TuG1812G0500000217.01	TuG1812G0500000217.01.T01	TC400018	95.951	494	16	3	1	491	1830	2322	0	798	3.10233	3.46456	1.37213	1.07392	0.198071	4.87243	-0.322338	-0.288637	-0.728792	-0.931165	-5.04868	-0.205236
5A	14023263	TuG1812G0500000218.01	TuG1812G0500000218.01.T01	TC377554	99	500	5	0	1	500	551	1050	0	896	2.06822	0.577427	NA	0	0	2.43622	-0.483507	-1.73182	0	NA	NA	-0.410473
5A	14023263	TuG1812G0500000218.01	TuG1812G0500000218.01.T01	comp13668_c0_seq1	97.975	395	7	1	1	395	648	1041	0	684	3.16799	1.90428	0.512483	0.70886	0.536548	1.05522	-0.315657	-0.525132	-1.95128	-1.41072	-1.86377	-0.947668
5A	14037381	TuG1812G0500000219.01	TuG1812G0500000219.01.T01	TC262413	93.372	513	20	7	1	500	580	1091	0	747	2.32675	1.83418	0.569963	1.04324	0.445661	1.0876	-0.429784	-0.545203	-1.7545	-0.958553	-2.24386	-0.919459
5A	14037381	TuG1812G0500000219.01	TuG1812G0500000219.01.T01	TC381910	97.505	481	10	1	1	479	682	1162	0	821	NA	NA	0.82328	2.14785	NA	2.43622	0	NA	-1.21465	-0.465583	0	-0.410473
5A	14037381	TuG1812G0500000219.01	TuG1812G0500000219.01.T01	comp2880_c0_seq1	95.378	476	16	4	1	476	741	1210	0	752	1.71711	2.0183	0.677308	0.838012	0.594214	1.13133	-0.582375	-0.495467	-1.47643	-1.1933	-1.68289	-0.883915
5A	14380347	TuG1812G0500000220.01	TuG1812G0500000220.01.T01	TC392574	99.448	362	2	0	1	362	362	1	0	658	3.10233	0	0.274427	0.536962	0	0	-0.322338	NA	-3.64396	-1.86233	NA	NA
5A	14380347	TuG1812G0500000220.01	TuG1812G0500000220.01.T01	comp1664_c0_seq1	96.253	427	13	1	22	445	1	427	0	697	1.17317	0.974877	0.982689	0.925872	0.797818	0.970222	-0.852389	-1.02577	-1.01762	-1.08006	-1.25342	-1.03069
5A	14721986	TuG1812G0500000221.01	TuG1812G0500000221.01.T01	comp2157_c0_seq1	99.383	324	2	0	2	325	1138	1461	2.19e-167	588	0.793767	0.769903	0.741152	0.75301	0.886931	0.730865	-1.25981	-1.29886	-1.34925	-1.328	-1.12748	-1.36824
5A	15292006	TuG1812G0500000228.01	TuG1812G0500000228.01.T01	TC378613	99.394	495	3	0	1	495	447	941	0	898	7.54195	31.3254	7.63821	0.624317	0.83873	1.25697	-0.132592	-0.0319229	-0.130921	-1.60175	-1.19228	-0.795562
5A	15292006	TuG1812G0500000228.01	TuG1812G0500000228.01.T01	TC405974	90.4	500	31	12	1	495	454	941	0	641	6.20467	NA	NA	0	NA	0	-0.161169	0	0	NA	NA	NA
5A	15292006	TuG1812G0500000228.01	TuG1812G0500000228.01.T01	comp10387_c0_seq1	98.522	203	0	1	1	200	739	941	1.54e-97	355	6.24345	22.2309	8.12265	0.552848	1.05766	1.21773	-0.160168	-0.0449823	-0.123113	-1.80882	-0.945479	-0.821197
5A	15311048	TuG1812G0500000229.01	TuG1812G0500000229.01.T01	TC267536	93.939	363	18	4	1	359	461	823	2.11e-154	545	1.03411	0.577427	NA	NA	NA	NA	-0.967014	-1.73182	NA	NA	0	NA
5A	15311048	TuG1812G0500000229.01	TuG1812G0500000229.01.T01	TC408485	90.909	462	22	9	1	444	518	977	1.24e-171	603	0	NA	NA	NA	1.18843	NA	NA	NA	NA	0	-0.841447	NA
5A	15311048	TuG1812G0500000229.01	TuG1812G0500000229.01.T01	comp267_c0_seq1	91.874	443	17	6	1	428	580	1018	4.06e-171	601	0.782923	0.665795	1.28716	0.80318	1.46053	0.641295	-1.27726	-1.50196	-0.776907	-1.24505	-0.684685	-1.55934
5A	15331168	TuG1812G0500000230.01	TuG1812G0500000230.01.T01	comp11968_c0_seq1	100	84	0	0	1	84	614	697	1.59e-37	156	0.443191	0.133252	0.480247	0.904356	0.286862	0.217519	-2.25637	-7.50455	-2.08226	-1.10576	-3.486	-4.59729
5A	15342976	TuG1812G0500000231.01	TuG1812G0500000231.01.T01	TC381268	100	500	0	0	1	500	268	767	0	924	6.47035	14.6795	0.507964	0.610971	0.500158	0.651988	-0.154551	-0.0681223	-1.96864	-1.63674	-1.99937	-1.53377
5A	15342976	TuG1812G0500000231.01	TuG1812G0500000231.01.T01	comp7286_c0_seq1	99.548	221	1	0	17	237	768	548	6.04e-112	403	6.7177	11.1626	0.492381	0.566065	0.537514	0.664083	-0.14886	-0.089585	-2.03095	-1.76658	-1.86042	-1.50584
5A	15353653	TuG1812G0500000232.01	TuG1812G0500000232.01.T01	GH721597	94.521	365	20	0	1	365	163	527	5.84e-160	564	4.13645	1.73228	0.31363	0	0.8319	1.62414	-0.241753	-0.577273	-3.18847	NA	-1.20207	-0.615709
5A	15353653	TuG1812G0500000232.01	TuG1812G0500000232.01.T01	comp13548_c0_seq1	100	88	0	0	1	88	440	527	1.17e-39	163	2.5628	2.93526	1.32224	1.31885	1.13561	1.74772	-0.390199	-0.340686	-0.756294	-0.758235	-0.880584	-0.572174
5A	15912315	TuG1812G0500000238.01	TuG1812G0500000238.01.T01	comp19438_c0_seq1	95.954	173	4	1	1	173	995	1164	3e-74	278	0.64632	0.461942	1.50935	2.14785	0.990357	0.913581	-1.54722	-2.16477	-0.662538	-0.465583	-1.00974	-1.09459
5A	17276646	TuG1812G0500000244.01	TuG1812G0500000244.01.T01	comp46544_c0_seq1	97.917	48	1	0	1	48	1206	1253	5.41e-16	84.2	0	NA	NA	NA	0	1.21811	NA	NA	0	NA	NA	-0.820945
5A	17276646	TuG1812G0500000244.01	TuG1812G0500000244.01.T01	comp6904_c0_seq1	99.231	390	3	0	14	403	1229	840	0	704	0.733412	0.514935	1.24145	0.997989	3.47146	0.888502	-1.36349	-1.94199	-0.805507	-1.00201	-0.288063	-1.12549
5A	17546862	TuG1812G0500000249.01	TuG1812G0500000249.01.T01	TC437252	91.6	250	15	3	10	259	662	419	7.98e-93	340	1.03411	0	NA	NA	0	NA	-0.967014	NA	0	NA	NA	NA
5A	17546862	TuG1812G0500000249.01	TuG1812G0500000249.01.T01	comp31177_c0_seq1	98.246	57	0	1	1	56	57	1	2.37e-20	99	1.03411	0.577427	NA	NA	1.18843	0.609054	-0.967014	-1.73182	0	0	-0.841447	-1.64189
5A	18407164	TuG1812G0500000252.01	TuG1812G0500000252.01.T01	TC386487	100	500	0	0	1	500	1954	2453	0	924	1.72352	1.31983	0	0	1.18843	1.39212	-0.580208	-0.757671	NA	NA	-0.841447	-0.718327
5A	18407164	TuG1812G0500000252.01	TuG1812G0500000252.01.T01	comp13585_c0_seq1	96.565	262	6	2	63	324	2442	2184	3.89e-120	431	1.37882	0.913141	0.82328	1.01932	0.639923	1.14353	-0.72526	-1.09512	-1.21465	-0.981049	-1.56269	-0.874485
5A	18427207	TuG1812G0500000253.01	TuG1812G0500000253.01.T01	comp17386_c0_seq1	98.326	239	4	0	2	240	2102	2340	6.95e-117	420	0.91921	0.329958	0.686067	2.14785	2.37686	0.374802	-1.08789	-3.03068	-1.45758	-0.465583	-0.420724	-2.66807
5A	18452309	TuG1812G0500000254.01	TuG1812G0500000254.01.T01	comp36720_c0_seq1	94.194	155	9	0	1	155	1334	1488	3.99e-62	237	NA	0.384951	NA	0	0.594214	0	NA	-2.59773	0	NA	-1.68289	NA
5A	18687591	TuG1812G0500000256.01	TuG1812G0500000256.01.T01	comp4048_c0_seq1	99.242	396	3	0	69	464	1	396	0	715	1.26032	1.31262	1.11215	1.12462	1.42737	1.2232	-0.793447	-0.761834	-0.899159	-0.889187	-0.700588	-0.817525
5A	19210756	TuG1812G0500000257.01	TuG1812G0500000257.01.T01	CA639895	89.662	503	17	34	1	468	472	974	2.06e-174	612	NA	NA	NA	4.29569	0	0.406036	0	NA	NA	-0.232791	NA	-2.46284
5A	19210756	TuG1812G0500000257.01	TuG1812G0500000257.01.T01	CK125392	93.973	448	26	1	1	448	409	855	0	676	NA	NA	NA	0	0	0.609054	NA	NA	NA	NA	NA	-1.64189
5A	19210756	TuG1812G0500000257.01	TuG1812G0500000257.01.T01	CK216966	86.028	501	50	19	1	499	640	1122	1.28e-146	520	2.06822	NA	0.137213	0.715949	0.396143	0.812072	-0.483507	0	-7.28792	-1.39675	-2.52434	-1.23142
5A	19210756	TuG1812G0500000257.01	TuG1812G0500000257.01.T01	TC239628	91.553	367	25	4	1	367	1004	1364	4.64e-141	501	4.4237	2.76465	0.750099	0.20994	0.518357	0.693062	-0.226055	-0.361709	-1.33316	-4.76327	-1.92917	-1.44287
5A	19210756	TuG1812G0500000257.01	TuG1812G0500000257.01.T01	TC266142	84.49	490	35	18	1	471	1039	1506	2.21e-124	446	NA	NA	NA	0.715949	1.58457	0	0	0	0	-1.39675	-0.631086	NA
5A	19210756	TuG1812G0500000257.01	TuG1812G0500000257.01.T01	TC381713	93.432	472	27	4	1	472	742	1209	0	699	NA	NA	NA	NA	0.594214	NA	NA	NA	0	NA	-1.68289	0
5A	19210756	TuG1812G0500000257.01	TuG1812G0500000257.01.T01	TC440039	91.794	524	17	26	1	499	595	1117	0	708	0	NA	NA	2.14785	1.18843	NA	NA	NA	NA	-0.465583	-0.841447	NA
5A	19210756	TuG1812G0500000257.01	TuG1812G0500000257.01.T01	comp72_c0_seq1	99.798	494	1	0	1	494	990	1483	0	907	2.8095	2.12174	0.343004	0.741399	0.682048	0.940654	-0.355935	-0.471311	-2.91542	-1.3488	-1.46617	-1.06309
5A	19210756	TuG1812G0500000257.01	TuG1812G0500000257.01.T01	comp7976_c0_seq1	98.333	60	1	0	1	60	1460	1519	2.28e-22	106	5.17056	2.77165	0.597281	0.520005	0.818695	0.77303	-0.193403	-0.360796	-1.67425	-1.92306	-1.22146	-1.29361
5A	20122577	TuG1812G0500000268.01	TuG1812G0500000268.01.T01	TC374223	99.399	499	3	0	1	499	1094	1592	0	905	NA	NA	NA	1.07392	NA	0.609054	NA	NA	NA	-0.931165	NA	-1.64189
5A	20122577	TuG1812G0500000268.01	TuG1812G0500000268.01.T01	comp10758_c0_seq1	96.447	394	9	3	14	403	1634	1242	0	645	1.15343	1.77961	0.815208	0.82985	0.665857	0.986088	-0.866978	-0.56192	-1.22668	-1.20504	-1.50182	-1.01411
5A	20548065	TuG1812G0500000272.01	TuG1812G0500000272.01.T02	comp44235_c0_seq1	100	81	0	0	3	83	565	645	6.86e-36	150	NA	0	NA	2.14785	NA	NA	NA	NA	NA	-0.465583	NA	NA
5A	20552651	TuG1812G0500000273.01	TuG1812G0500000273.01.T01	comp26031_c0_seq1	96	50	2	0	89	138	496	545	3.09e-15	82.4	0.590921	0.769903	1.37213	0	2.37686	0.812072	-1.69227	-1.29886	-0.728792	NA	-0.420724	-1.23142
5A	20946817	TuG1812G0500000277.01	TuG1812G0500000277.01.T03	BJ465195	95.276	254	12	0	1	254	685	938	1.41e-113	409	NA	1.15485	NA	0	0	1.21811	NA	-0.86591	NA	NA	NA	-0.820945
5A	20946817	TuG1812G0500000277.01	TuG1812G0500000277.01.T02	TC255020	91.617	501	25	5	1	498	500	986	0	676	NA	NA	NA	NA	NA	1.21811	NA	0	NA	0	NA	-0.820945
5A	20946817	TuG1812G0500000277.01	TuG1812G0500000277.01.T01	TC379292	93.415	410	21	4	80	487	947	1352	1.24e-171	603	NA	0.577427	NA	NA	NA	1.21811	NA	-1.73182	0	NA	NA	-0.820945
5A	20946817	TuG1812G0500000277.01	TuG1812G0500000277.01.T03	TC396980	99.599	499	2	0	1	499	536	1034	0	911	2.06822	1.92476	0.548853	0.715949	0.108039	1.39212	-0.483507	-0.519546	-1.82198	-1.39675	-9.25592	-0.718327
5A	20946817	TuG1812G0500000277.01	TuG1812G0500000277.01.T02	TC416601	95.418	502	13	8	1	500	501	994	0	791	NA	NA	NA	NA	0	1.21811	NA	NA	NA	NA	NA	-0.820945
5A	20946817	TuG1812G0500000277.01	TuG1812G0500000277.01.T03	TC451521	96.903	226	7	0	1	226	524	749	2.27e-104	379	5.17056	0	0.686067	0	0.594214	0.609054	-0.193403	NA	-1.45758	NA	-1.68289	-1.64189
5A	20946817	TuG1812G0500000277.01	TuG1812G0500000277.01.T01	comp3868_c0_seq1	98.834	429	5	0	45	473	1374	946	0	765	1.38803	1.54893	0.842727	0.838543	0.747941	0.86724	-0.720445	-0.645608	-1.18662	-1.19255	-1.337	-1.15308
5A	20952052	TuG1812G0500000278.01	TuG1812G0500000278.01.T01	TC423400	97.2	500	14	0	1	500	900	1399	0	846	NA	0.577427	NA	1.07392	1.18843	1.21811	0	-1.73182	NA	-0.931165	-0.841447	-0.820945
5A	20952052	TuG1812G0500000278.01	TuG1812G0500000278.01.T01	comp4197_c0_seq1	99.709	344	1	0	1	344	1072	1415	4.97e-180	630	2.40153	2.00666	0.448321	1.16386	0.955403	1.46798	-0.416401	-0.49834	-2.23055	-0.859212	-1.04668	-0.68121
5A	21557627	TuG1812G0500000294.01	TuG1812G0500000294.01.T01	CA614192	92.113	355	23	5	1	353	514	865	3.44e-141	501	NA	2.30971	NA	2.14785	NA	NA	0	-0.432955	0	-0.465583	NA	0
5A	21557627	TuG1812G0500000294.01	TuG1812G0500000294.01.T01	TC390966	94.212	311	12	5	1	308	747	1054	1.31e-131	470	3.61939	3.46456	NA	4.29569	0.891321	NA	-0.27629	-0.288637	0	-0.232791	-1.12193	0
5A	21557627	TuG1812G0500000294.01	TuG1812G0500000294.01.T01	comp20078_c0_seq1	90.171	468	22	1	1	444	535	1002	3.06e-167	588	1.03411	3.17585	NA	NA	4.75371	10.963	-0.967014	-0.314876	0	0	-0.210362	-0.0912161
5A	21557627	TuG1812G0500000294.01	TuG1812G0500000294.01.T01	comp20078_c0_seq3	95.413	218	9	1	1	217	535	752	9.36e-95	346	0	0.384951	1.64656	NA	NA	1.21811	NA	-2.59773	-0.607327	NA	NA	-0.820945
5A	21806427	TuG1812G0500000300.01	TuG1812G0500000300.01.T01	comp3245_c0_seq1	93.284	134	6	1	1	134	1104	1234	6.22e-49	195	3.05127	3.23848	1.82247	1.02985	1.47921	1.93066	-0.327733	-0.308787	-0.548705	-0.971013	-0.676035	-0.517957
5A	21813994	TuG1812G0500000302.01	TuG1812G0500000302.01.T01	comp31343_c0_seq1	96.875	32	1	0	226	257	578	547	7.67e-07	54.7	1.55117	0.43307	NA	1.07392	5.94214	3.04527	-0.644676	-2.30909	0	-0.931165	-0.168289	-0.328378
5A	21872572	TuG1812G0500000304.01	TuG1812G0500000304.01.T01	comp26326_c0_seq1	98.23	226	3	1	1	225	2177	2402	3.55e-109	394	1.37882	0	0.82328	1.28871	5.94214	1.62414	-0.72526	NA	-1.21465	-0.775971	-0.168289	-0.615709
5A	21963560	TuG1812G0500000307.01	TuG1812G0500000307.01.T01	comp20078_c0_seq2	92.42	343	26	0	1	343	272	614	6.73e-138	490	1.77276	6.10423	9.3305	6.44354	0.704254	5.27847	-0.564091	-0.163821	-0.107175	-0.155194	-1.41994	-0.189449
5A	22472124	TuG1812G0500000312.01	TuG1812G0500000312.01.T01	TC386909	99.6	500	2	0	1	500	2009	2508	0	913	0	2.30971	NA	0	NA	NA	NA	-0.432955	NA	NA	NA	0
5A	23588519	TuG1812G0500000319.01	TuG1812G0500000319.01.T01	TC371649	99.799	498	1	0	1	498	891	1388	0	915	1.03411	NA	0.274427	NA	NA	NA	-0.967014	0	-3.64396	0	NA	NA
5A	23588519	TuG1812G0500000319.01	TuG1812G0500000319.01.T01	comp22410_c0_seq1	96.875	224	7	0	16	239	1159	1382	1.43e-103	375	2.06822	1.95225	0.707176	1.01313	0.838891	0.848325	-0.483507	-0.512228	-1.41407	-0.987035	-1.19205	-1.17879
5A	23588519	TuG1812G0500000319.01	TuG1812G0500000319.01.T01	comp45121_c0_seq1	96.296	81	3	0	45	125	1097	1177	4.15e-31	134	0.517056	NA	NA	2.14785	NA	NA	-1.93403	0	0	-0.465583	NA	NA
5A	23888523	TuG1812G0500000324.01	TuG1812G0500000324.01.T02	TC414129	99	500	5	0	1	500	313	812	0	896	0	NA	0.274427	NA	1.18843	NA	NA	NA	-3.64396	NA	-0.841447	NA
5A	24288771	TuG1812G0500000328.01	TuG1812G0500000328.01.T01	comp21909_c0_seq1	98.828	256	3	0	1	256	872	1127	6.52e-128	457	1.00457	0.824896	0.771008	0.560308	0.484175	0.609054	-0.995455	-1.21227	-1.297	-1.78473	-2.06537	-1.64189
5A	25779139	TuG1812G0500000332.01	TuG1812G0500000332.01.T01	TC387696	96.421	503	13	4	1	500	2748	3248	0	824	NA	0.577427	NA	0	0.396143	NA	NA	-1.73182	NA	NA	-2.52434	NA
5A	25779139	TuG1812G0500000332.01	TuG1812G0500000332.01.T01	comp8345_c0_seq1	99.422	346	2	0	1	346	2966	3311	1.38e-179	628	1.31085	1.37413	1.13312	0.838683	0.941329	1.18876	-0.762867	-0.727733	-0.882522	-1.19235	-1.06233	-0.841215
5A	25962211	TuG1812G0500000333.01	TuG1812G0500000333.01.T01	comp21809_c0_seq1	96.341	246	3	2	1	245	598	838	8.11e-111	399	0.689408	0.721784	0.109771	0.488147	0.0660238	0.0609054	-1.45052	-1.38546	-9.1099	-2.04856	-15.1461	-16.4189
5A	26124439	TuG1812G0500000334.01	TuG1812G0500000334.01.T02	comp31380_c0_seq1	97.927	193	4	0	1	193	2624	2816	1.77e-91	335	NA	0.577427	0	1.07392	0.792286	0.406036	0	-1.73182	NA	-0.931165	-1.26217	-2.46284
5A	27005102	TuG1812G0500000338.01	TuG1812G0500000338.01.T01	comp19767_c0_seq1	100	105	0	0	1	105	2602	2706	5.89e-49	195	1.30987	1.22703	0.673593	0.596624	1.03342	0.766957	-0.763432	-0.814974	-1.48458	-1.6761	-0.967665	-1.30385
5A	27188002	TuG1812G0500000340.01	TuG1812G0500000340.01.T01	comp27032_c0_seq1	84.946	186	14	8	1	176	400	581	1.81e-43	176	1.93896	6.46719	5.03115	3.04278	4.08199	2.03018	-0.515741	-0.154627	-0.198762	-0.328647	-0.244978	-0.492567
5A	27761375	TuG1812G0500000348.01	TuG1812G0500000348.01.T01	AV836323	98.81	420	5	0	81	500	767	1186	0	749	NA	NA	NA	NA	NA	0.304527	NA	0	0	NA	NA	-3.28378
5A	27761375	TuG1812G0500000348.01	TuG1812G0500000348.01.T01	TC246143	86.035	401	46	5	9	400	2928	3327	3.72e-117	422	0.517056	NA	NA	NA	0	NA	-1.93403	0	0	NA	NA	NA
5A	27761375	TuG1812G0500000348.01	TuG1812G0500000348.01.T01	comp19443_c0_seq1	92.205	526	36	5	7	529	3179	2656	0	739	1.87125	1.52606	1.29729	1.10295	0.990357	0.967321	-0.534402	-0.655283	-0.770838	-0.906661	-1.00974	-1.03378
5A	28370412	TuG1812G0500000357.01	TuG1812G0500000357.01.T01	TC252770	94.298	456	22	1	1	452	318	773	0	695	1.8708	2.18139	1.12737	1.06098	0.973778	1.73242	-0.53453	-0.458423	-0.887017	-0.942521	-1.02693	-0.577227
5A	28370412	TuG1812G0500000357.01	TuG1812G0500000357.01.T01	TC386220	99.8	500	1	0	1	500	296	795	0	918	12.0215	5.48556	2.37836	6.03049	2.72639	3.57574	-0.083184	-0.182297	-0.420457	-0.165824	-0.366785	-0.279663
5A	28370412	TuG1812G0500000357.01	TuG1812G0500000357.01.T01	comp11317_c0_seq1	98.734	237	3	0	17	253	846	610	2e-117	422	0.857037	0.87854	0.642736	0.355929	0.465207	0.727832	-1.16681	-1.13825	-1.55585	-2.80955	-2.14958	-1.37394
5A	28399172	TuG1812G0500000358.01	TuG1812G0500000358.01.T01	comp26537_c0_seq1	98.333	120	2	0	1	120	1452	1571	2.18e-54	211	3.10233	0.230971	NA	0	0.198071	0.152264	-0.322338	-4.32955	0	NA	-5.04868	-6.56756
5A	28992951	TuG1812G0500000362.01	TuG1812G0500000362.01.T01	comp6539_c0_seq1	96.682	422	14	0	1	422	1877	2298	0	702	1.23618	1.22085	1.12629	1.06066	0.651719	1.17162	-0.808944	-0.819104	-0.887869	-0.942805	-1.5344	-0.853522
5A	29002801	TuG1812G0500000363.01	TuG1812G0500000363.01.T01	comp1816_c0_seq1	93.784	370	20	2	1	370	373	739	1.43e-156	553	0.553053	0.467313	2.24467	0.955978	1.40214	0.938542	-1.80814	-2.13989	-0.4455	-1.04605	-0.713197	-1.06548
5A	29009207	TuG1812G0500000364.01	TuG1812G0500000364.01.T01	comp11703_c0_seq1	98.577	281	3	1	1	280	2178	2458	1.58e-139	496	1.86936	0.958747	0.738841	0.601397	0.946714	0.626967	-0.534944	-1.04303	-1.35347	-1.6628	-1.05629	-1.59498
5A	29244628	TuG1812G0500000365.01	TuG1812G0500000365.01.T01	CD924012	98.397	499	8	0	1	499	3034	3532	0	878	NA	NA	0.548853	0	1.18843	NA	NA	NA	-1.82198	NA	-0.841447	NA
5A	29244628	TuG1812G0500000365.01	TuG1812G0500000365.01.T01	TC240476	93.469	490	12	8	1	489	3261	3731	0	710	3.10233	0	1.64656	0.357974	0.891321	0.406036	-0.322338	NA	-0.607327	-2.7935	-1.12193	-2.46284
5A	29244628	TuG1812G0500000365.01	TuG1812G0500000365.01.T01	TC250332	94.477	344	5	5	1	343	3316	3646	4.61e-146	518	NA	NA	NA	0	1.98071	0.812072	0	NA	0	NA	-0.504868	-1.23142
5A	29244628	TuG1812G0500000365.01	TuG1812G0500000365.01.T01	TC404055	98.4	500	5	2	1	500	3237	3733	0	876	1.2166	2.06224	1.04282	0.733411	0.806434	1.33992	-0.821962	-0.48491	-0.958937	-1.36349	-1.24003	-0.746314
5A	29244628	TuG1812G0500000365.01	TuG1812G0500000365.01.T01	TC437537	99.6	500	2	0	1	500	2424	2923	0	917	NA	NA	NA	1.07392	NA	1.21811	NA	NA	0	-0.931165	NA	-0.820945
5A	29244628	TuG1812G0500000365.01	TuG1812G0500000365.01.T01	comp5121_c0_seq1	100	277	0	0	98	374	3492	3768	1.62e-144	512	1.4895	1.22795	0.864036	0.813386	0.67748	1.03071	-0.671366	-0.814368	-1.15736	-1.22943	-1.47606	-0.970208
5A	29257502	TuG1812G0500000366.01	TuG1812G0500000366.01.T03	CA683130	94.86	428	7	15	1	413	1917	2344	0	664	2.06822	2.30971	NA	0	0.950743	0	-0.483507	-0.432955	0	NA	-1.05181	NA
5A	29257502	TuG1812G0500000366.01	TuG1812G0500000366.01.T03	TC275263	90.744	497	46	0	1	497	2092	2588	0	664	NA	0.577427	0.640329	0.859138	1.01865	0.304527	0	-1.73182	-1.5617	-1.16396	-0.981689	-3.28378
5A	29257502	TuG1812G0500000366.01	TuG1812G0500000366.01.T01	TC400410	99.004	502	3	1	1	500	2604	3105	0	898	0.804309	0.747259	1.01327	0.69805	0.654848	1.37528	-1.2433	-1.33822	-0.986906	-1.43256	-1.52707	-0.727123
5A	29257502	TuG1812G0500000366.01	TuG1812G0500000366.01.T01	comp554_c0_seq1	97.526	485	8	2	1	482	2622	3105	0	826	0.908541	0.967537	0.911538	0.807657	0.639445	1.11408	-1.10067	-1.03355	-1.09705	-1.23815	-1.56386	-0.897603
5A	29274381	TuG1812G0500000367.01	TuG1812G0500000367.01.T01	TC238736	89.305	374	34	4	1	373	626	994	6.09e-130	464	0.834949	1.04237	0.874983	0.678267	0.609549	1.2595	-1.19768	-0.959353	-1.14288	-1.47435	-1.64056	-0.793966
5A	29274381	TuG1812G0500000367.01	TuG1812G0500000367.01.T01	TC385679	98.617	506	1	1	1	500	292	797	0	891	0.620467	1.34733	0.792788	2.72061	0.445661	1.49921	-1.61169	-0.742209	-1.26137	-0.367565	-2.24386	-0.667018
5A	29274381	TuG1812G0500000367.01	TuG1812G0500000367.01.T01	TC439999	95.792	499	12	4	1	492	378	874	0	797	0.517056	1.06602	1.26922	0.781035	0.396143	1.26683	-1.93403	-0.938069	-0.787884	-1.28035	-2.52434	-0.78937
5A	29274381	TuG1812G0500000367.01	TuG1812G0500000367.01.T01	comp1612_c0_seq1	97.568	329	8	0	1	329	837	509	6.57e-160	564	0.873473	0.787551	0.995324	0.93513	0.603885	1.22543	-1.14486	-1.26976	-1.0047	-1.06937	-1.65594	-0.816041
5A	29274381	TuG1812G0500000367.01	TuG1812G0500000367.01.T01	comp44545_c0_seq1	100	127	0	0	2	128	406	532	1.14e-61	235	0.689408	2.30971	0.548853	4.29569	1.18843	NA	-1.45052	-0.432955	-1.82198	-0.232791	-0.841447	0
5A	29353435	TuG1812G0500000368.01	TuG1812G0500000368.01.T02	CO349695	96.495	485	12	2	5	484	284	768	0	797	NA	1.15485	NA	NA	NA	0	NA	-0.86591	NA	NA	NA	NA
5A	29816947	TuG1812G0500000369.01	TuG1812G0500000369.01.T01	TC249785	95.753	259	11	0	9	267	259	1	4.81e-116	418	NA	0	NA	4.29569	0	0.406036	0	NA	0	-0.232791	NA	-2.46284
5A	30566401	TuG1812G0500000374.01	TuG1812G0500000374.01.T01	TC242448	89.303	402	33	7	1	399	1270	1664	2.16e-139	496	0.517056	NA	NA	0	0	1.21811	-1.93403	0	NA	NA	NA	-0.820945
5A	30566401	TuG1812G0500000374.01	TuG1812G0500000374.01.T01	comp1067_c0_seq1	98.068	207	3	1	120	325	1590	1384	1.87e-98	359	1.75359	1.52525	0.575686	0.54459	0.646755	1.42314	-0.570259	-0.655632	-1.73706	-1.83624	-1.54618	-0.702673
5A	31096446	TuG1812G0500000375.01	TuG1812G0500000375.01.T01	comp38575_c0_seq1	96.429	224	2	1	1	218	2157	2380	2.72e-100	364	1.37882	1.15485	6.44903	0.715949	1.18843	6.09054	-0.72526	-0.86591	-0.155062	-1.39675	-0.841447	-0.164189
5A	31220834	TuG1812G0500000376.01	TuG1812G0500000376.01.T01	TC393429	99.799	498	1	0	1	498	928	1425	0	915	NA	0	NA	NA	0.396143	NA	0	NA	0	NA	-2.52434	NA
5A	31220834	TuG1812G0500000376.01	TuG1812G0500000376.01.T01	comp2172_c0_seq1	96.984	431	7	3	21	446	1043	1472	0	719	0.617781	0.768113	1.51211	1.01224	0.680796	1.43625	-1.6187	-1.30189	-0.661328	-0.987912	-1.46887	-0.696257
5A	31542004	TuG1812G0500000379.01	TuG1812G0500000379.01.T01	comp3272_c0_seq1	99.517	207	0	1	1	206	878	1084	2.89e-103	375	0.951794	0.938994	0.939054	0.741633	0.910058	1.01842	-1.05065	-1.06497	-1.0649	-1.34838	-1.09883	-0.981915
5A	31551188	TuG1812G0500000380.01	TuG1812G0500000380.01.T01	EX583786	95.436	482	12	2	1	482	557	1028	0	760	1.72352	0.944881	1.92099	1.61088	0.339551	0.913581	-0.580208	-1.05833	-0.520566	-0.620777	-2.94507	-1.09459
5A	31551188	TuG1812G0500000380.01	TuG1812G0500000380.01.T01	TC253409	98.008	251	5	0	1	251	778	1028	1.33e-121	436	1.03411	1.15485	NA	0	NA	NA	-0.967014	-0.86591	0	NA	NA	NA
5A	31551188	TuG1812G0500000380.01	TuG1812G0500000380.01.T01	comp7392_c0_seq1	100	248	0	0	17	264	1037	790	1.44e-128	459	0.846091	0.613071	1.31115	0.747077	1.07248	1.10983	-1.18191	-1.63113	-0.76269	-1.33855	-0.932415	-0.901037
5A	31556576	TuG1812G0500000381.01	TuG1812G0500000381.01.T02	GH728440	99.571	233	1	0	1	233	654	886	1.92e-118	425	NA	NA	NA	2.14785	1.18843	NA	0	NA	0	-0.465583	-0.841447	NA
5A	31556576	TuG1812G0500000381.01	TuG1812G0500000381.01.T02	comp12836_c0_seq1	98.039	51	1	0	1	51	1245	1295	3.05e-17	89.8	1.42951	1.08556	0.787485	0.523193	0.513518	0.905351	-0.699542	-0.921181	-1.26987	-1.91134	-1.94735	-1.10454
5A	31565414	TuG1812G0500000383.01	TuG1812G0500000383.01.T01	TC451094	93.769	337	21	0	2	338	645	981	8.8e-143	507	0.517056	0.989875	0.82328	0.805442	0.509326	0.609054	-1.93403	-1.01023	-1.21465	-1.24155	-1.96338	-1.64189
5A	31565414	TuG1812G0500000383.01	TuG1812G0500000383.01.T01	TC452709	95.425	153	3	1	1	149	153	1	1.12e-62	241	2.06822	NA	NA	1.4319	2.37686	NA	-0.483507	0	0	-0.698374	-0.420724	0
5A	31565414	TuG1812G0500000383.01	TuG1812G0500000383.01.T01	comp1287_c0_seq1	97.661	171	4	0	199	369	981	811	6.12e-79	294	1.25072	1.33601	1.04416	0.949728	0.989054	1.27543	-0.799542	-0.748498	-0.957708	-1.05293	-1.01107	-0.784049
5A	31873584	TuG1812G0500000385.01	TuG1812G0500000385.01.T01	CA500179	99.455	367	2	0	16	382	2136	2502	0	667	2.06822	0.577427	NA	0	0.396143	0	-0.483507	-1.73182	0	NA	-2.52434	NA
5A	31883921	TuG1812G0500000387.01	TuG1812G0500000387.01.T01	comp21451_c0_seq1	93.651	189	3	1	133	312	788	976	1.11e-72	274	2.32675	0.577427	1.64656	0.671202	0.792286	0.931494	-0.429784	-1.73182	-0.607327	-1.48986	-1.26217	-1.07354
5A	31883921	TuG1812G0500000387.01	TuG1812G0500000387.01.T01	comp21451_c0_seq2	100	117	0	0	1	117	381	497	1.86e-55	217	1.55117	1.15485	2.46984	2.14785	1.18843	0.913581	-0.644676	-0.86591	-0.404885	-0.465583	-0.841447	-1.09459
5A	32334418	TuG1812G0500000389.01	TuG1812G0500000389.01.T01	comp25686_c0_seq1	98.742	159	2	0	1	159	2119	2277	1.14e-75	283	0.574506	1.15485	2.74427	0	0.950743	1.21811	-1.74063	-0.86591	-0.364396	NA	-1.05181	-0.820945
5A	32334418	TuG1812G0500000389.01	TuG1812G0500000389.01.T01	comp29710_c0_seq1	97.5	320	7	1	5	323	1804	2123	1.33e-154	545	0.620467	0.769903	NA	0	0	0	-1.61169	-1.29886	NA	NA	NA	NA
5A	32399374	TuG1812G0500000392.01	TuG1812G0500000392.01.T01	TC383909	96.586	498	13	4	1	496	273	768	0	822	0.517056	0	NA	0	0	0	-1.93403	NA	NA	NA	NA	NA
5A	32399374	TuG1812G0500000392.01	TuG1812G0500000392.01.T01	TC390843	100	500	0	0	1	500	286	785	0	924	22.7504	36.9553	2.40123	19.3306	28.5223	26.7984	-0.0439552	-0.0270597	-0.416453	-0.0517314	-0.0350603	-0.0373157
5A	32399374	TuG1812G0500000392.01	TuG1812G0500000392.01.T01	comp1977_c0_seq1	95.738	305	9	2	1	301	451	755	2.24e-137	488	1.06334	0.744881	0.702431	0.446912	0.496931	0.440592	-0.940429	-1.3425	-1.42363	-2.23758	-2.01235	-2.26967
5A	32429544	TuG1812G0500000393.01	TuG1812G0500000393.01.T02	TC390701	97	500	11	4	1	498	312	809	0	837	3.10233	NA	0.82328	NA	1.18843	0.304527	-0.322338	0	-1.21465	0	-0.841447	-3.28378
5A	32429544	TuG1812G0500000393.01	TuG1812G0500000393.01.T02	comp6783_c0_seq1	94.02	301	8	5	43	343	608	898	4.11e-125	448	1.49258	1.26824	0.765627	0.740321	0.644365	1.32917	-0.669979	-0.788494	-1.30612	-1.35076	-1.55191	-0.752349
5A	32432968	TuG1812G0500000394.01	TuG1812G0500000394.01.T01	CA638587	98.919	185	2	0	1	185	796	980	2.19e-90	331	0	NA	NA	0	0	0.304527	NA	NA	NA	NA	NA	-3.28378
5A	32432968	TuG1812G0500000394.01	TuG1812G0500000394.01.T01	CA681566	93.548	496	15	16	1	479	421	916	0	737	NA	1.15485	NA	NA	NA	0	NA	-0.86591	NA	0	NA	NA
5A	32432968	TuG1812G0500000394.01	TuG1812G0500000394.01.T01	TC387200	97.206	501	11	3	1	500	432	930	0	845	2.06822	1.53981	NA	0.715949	1.18843	1.52264	-0.483507	-0.649432	0	-1.39675	-0.841447	-0.656756
5A	32743513	TuG1812G0500000399.01	TuG1812G0500000399.01.T01	comp22528_c0_seq1	98.75	80	1	0	1	80	2432	2511	1.74e-33	143	0.443191	1.31983	0.548853	0.477299	0.648234	0.931494	-2.25637	-0.757671	-1.82198	-2.09512	-1.54265	-1.07354
5A	32748494	TuG1812G0500000400.01	TuG1812G0500000400.01.T01	CA734930	99.789	474	1	0	1	474	1344	1817	0	870	0.729961	0.824896	3.56755	0.268481	2.11276	0.937006	-1.36994	-1.21227	-0.280305	-3.72466	-0.473314	-1.06723
5A	32748494	TuG1812G0500000400.01	TuG1812G0500000400.01.T01	comp6751_c0_seq1	99.462	372	2	0	10	381	2068	1697	0	676	0.998038	0.815731	1.65963	0.820525	1.07873	1.04079	-1.00197	-1.22589	-0.602545	-1.21873	-0.927018	-0.96081
5A	32920804	TuG1812G0500000401.01	TuG1812G0500000401.01.T01	comp2235_c0_seq1	97.358	265	5	1	403	667	831	569	2.3e-125	449	1.66532	1.22213	0.783906	0.853631	0.680332	1.15757	-0.600484	-0.818245	-1.27566	-1.17147	-1.46987	-0.863882
5A	33169379	TuG1812G0500000407.01	TuG1812G0500000407.01.T01	TC424422	94.008	484	19	6	1	484	980	1453	0	725	1.77276	0.87489	1.85238	0	0.814922	0.609054	-0.564091	-1.143	-0.539846	NA	-1.22711	-1.64189
5A	33169379	TuG1812G0500000407.01	TuG1812G0500000407.01.T01	comp1283_c0_seq1	94.828	464	15	5	2	465	1125	1579	0	715	1.30311	1.00109	0.989674	0.711226	0.931393	1.11715	-0.767393	-0.998909	-1.01043	-1.40602	-1.07366	-0.895134
5A	33278615	TuG1812G0500000411.01	TuG1812G0500000411.01.T01	BJ244453	96	500	20	0	1	500	204	703	0	813	1.03411	NA	NA	NA	NA	NA	-0.967014	NA	NA	NA	NA	NA
5A	33278615	TuG1812G0500000411.01	TuG1812G0500000411.01.T01	comp2067_c0_seq1	100	213	0	0	3	215	1730	1942	1.05e-108	394	0.925257	0.949265	1.51632	1.07691	1.32598	0.946889	-1.08078	-1.05345	-0.65949	-0.928579	-0.75416	-1.05609
5A	34681627	TuG1812G0500000414.01	TuG1812G0500000414.01.T01	TC250195	86.835	357	23	15	1	347	482	140	8.16e-104	377	NA	0.577427	NA	NA	1.18843	NA	0	-1.73182	NA	0	-0.841447	0
5A	34681627	TuG1812G0500000414.01	TuG1812G0500000414.01.T01	TC422297	97.61	502	10	1	1	500	506	5	0	859	0.91921	0.769903	1.37213	0	NA	0.812072	-1.08789	-1.29886	-0.728792	NA	0	-1.23142
5A	34681627	TuG1812G0500000414.01	TuG1812G0500000414.01.T01	comp21466_c0_seq1	95.652	138	3	2	1	136	181	45	1.24e-56	219	NA	2.30971	NA	NA	0	0	0	-0.432955	0	0	NA	NA
5A	34681627	TuG1812G0500000414.01	TuG1812G0500000414.01.T01	comp4906_c0_seq1	97.377	305	8	0	19	323	159	463	8.44e-147	520	0.602927	0.652978	1.40262	1.14955	1.0513	0.408196	-1.65858	-1.53144	-0.712949	-0.869905	-0.951201	-2.4498
5A	34693638	TuG1812G0500000415.01	TuG1812G0500000415.01.T01	TC431349	98.985	394	4	0	12	405	394	1	0	706	0.379174	0.167979	1.82951	0.452178	0.427834	0.152264	-2.63731	-5.95313	-0.546594	-2.21152	-2.33735	-6.56756
5A	38799958	TuG1812G0500000432.01	TuG1812G0500000432.01.T01	DR733927	90.543	497	34	10	1	493	827	1314	0	647	3.10233	0	NA	0	1.18843	NA	-0.322338	NA	0	NA	-0.841447	0
5A	38799958	TuG1812G0500000432.01	TuG1812G0500000432.01.T01	TC414652	99.197	498	4	0	1	498	964	1461	0	898	0.98915	1.07236	1.92099	0.920505	1.11415	1.52264	-1.01097	-0.932518	-0.520566	-1.08636	-0.897544	-0.656756
5A	38799958	TuG1812G0500000432.01	TuG1812G0500000432.01.T01	comp23437_c0_seq1	100	71	0	0	271	341	1006	1076	5.86e-30	132	0.904847	0.88835	0.914755	0.505376	0.475371	1.46173	-1.10516	-1.12568	-1.09319	-1.97873	-2.10362	-0.684121
5A	38831327	TuG1812G0500000433.01	TuG1812G0500000433.01.T01	CA619119	93.957	513	8	20	3	497	1271	764	0	761	2.32675	1.44357	0.960493	1.78987	0.990357	1.0963	-0.429784	-0.692728	-1.04113	-0.558699	-1.00974	-0.912161
5A	38831327	TuG1812G0500000433.01	TuG1812G0500000433.01.T01	TC257891	93.196	485	28	2	1	484	946	1426	0	708	0.593738	0.744044	1.34203	1.09361	1.48295	1.0948	-1.68425	-1.34401	-0.745137	-0.914404	-0.674331	-0.913407
5A	38831327	TuG1812G0500000433.01	TuG1812G0500000433.01.T01	comp13707_c0_seq1	100	37	0	0	1	37	1391	1427	1.52e-11	69.4	0	0.577427	NA	2.14785	NA	0.609054	NA	-1.73182	NA	-0.465583	NA	-1.64189
5A	38831327	TuG1812G0500000433.01	TuG1812G0500000433.01.T01	comp3617_c0_seq1	98.969	485	1	1	18	502	1414	934	0	865	0.692538	0.670885	1.56791	1.04109	1.48473	0.98136	-1.44396	-1.49057	-0.637791	-0.960531	-0.673525	-1.01899
5A	39219866	TuG1812G0500000440.01	TuG1812G0500000440.01.T01	comp13734_c0_seq1	97.778	270	2	2	1	270	1104	1369	1.65e-129	462	1.66607	2.59842	0.705668	1.25908	1.78264	0.730865	-0.600216	-0.384849	-1.4171	-0.794229	-0.560965	-1.36824
5A	39753105	TuG1812G0500000443.01	TuG1812G0500000443.01.T01	CB881947	90.751	519	23	6	1	500	1988	1476	0	669	0.517056	0.749095	0.82328	0	1.18843	0.304527	-1.93403	-1.33494	-1.21465	NA	-0.841447	-3.28378
5A	39753105	TuG1812G0500000443.01	TuG1812G0500000443.01.T01	TC245422	97.374	495	13	0	1	495	1112	1606	0	843	NA	0.577427	0.548853	6.44354	NA	0.487243	NA	-1.73182	-1.82198	-0.155194	0	-2.05236
5A	39753105	TuG1812G0500000443.01	TuG1812G0500000443.01.T03	TC260374	95.625	320	14	0	100	419	856	1175	5.71e-145	514	NA	2.30971	NA	NA	NA	0	0	-0.432955	0	NA	NA	NA
5A	39753105	TuG1812G0500000443.01	TuG1812G0500000443.01.T01	TC371654	97.405	501	12	1	1	500	1533	2033	0	852	NA	0	NA	NA	1.18843	0	NA	NA	0	NA	-0.841447	NA
5A	39753105	TuG1812G0500000443.01	TuG1812G0500000443.01.T03	TC427086	92.476	412	14	17	1	396	790	1200	7.5e-164	577	NA	1.15485	NA	0	0.713057	NA	NA	-0.86591	0	NA	-1.40241	0
5A	39753105	TuG1812G0500000443.01	TuG1812G0500000443.01.T01	TC452557	88.544	515	13	43	1	470	1162	1675	5.76e-170	597	0	0	NA	4.29569	NA	NA	NA	NA	0	-0.232791	0	NA
5A	39753105	TuG1812G0500000443.01	TuG1812G0500000443.01.T01	comp24448_c0_seq1	100	146	0	0	67	212	1576	1431	6.24e-72	270	0.689408	0.384951	1.64656	0	1.90149	0.974487	-1.45052	-2.59773	-0.607327	NA	-0.525905	-1.02618
5A	39753105	TuG1812G0500000443.01	TuG1812G0500000443.01.T01	comp398_c0_seq1	98.507	335	5	0	1	335	1652	1986	1.75e-168	592	0.645848	0.678024	1.7162	1.35526	1.5982	0.913348	-1.54835	-1.47487	-0.582683	-0.737865	-0.625704	-1.09487
5A	39753105	TuG1812G0500000443.01	TuG1812G0500000443.01.T01	comp398_c0_seq2	99.023	307	3	0	1	307	1835	2141	2.9e-156	551	0.617239	0.631507	1.67227	1.13887	1.81763	0.839404	-1.62012	-1.58351	-0.597989	-0.878063	-0.550167	-1.19132
5A	39753105	TuG1812G0500000443.01	TuG1812G0500000443.01.T01	comp398_c0_seq3	99	200	2	0	1	200	1835	2034	1.21e-98	359	0.665905	0.75557	1.3651	1.04639	1.80604	0.781855	-1.50172	-1.3235	-0.732549	-0.95567	-0.553699	-1.27901
5A	39776430	TuG1812G0500000447.01	TuG1812G0500000447.01.T01	comp13771_c0_seq1	97.947	341	4	2	14	352	687	348	2.38e-167	588	1.82201	2.60912	1.09771	1.23914	1.16142	1.66376	-0.548846	-0.383272	-0.91099	-0.80701	-0.861016	-0.601049
5A	39994705	TuG1812G0500000448.01	TuG1812G0500000448.01.T01	TC374256	95.862	435	15	2	1	432	276	710	0	701	0.827289	1.73228	2.19541	1.07392	0.356529	0.522046	-1.20877	-0.577273	-0.455495	-0.931165	-2.80482	-1.91554
5A	39994705	TuG1812G0500000448.01	TuG1812G0500000448.01.T01	TC433779	94.416	197	11	0	2	198	181	377	6.49e-85	315	0.556829	0.747259	2.46984	1.4319	0.924333	1.43307	-1.79588	-1.33822	-0.404885	-0.698374	-1.08186	-0.697803
5A	39994705	TuG1812G0500000448.01	TuG1812G0500000448.01.T01	comp29031_c0_seq1	95.455	198	5	3	1	194	513	710	1.18e-84	313	7.75583	1.46981	1.57795	0.653692	0.735694	1.31962	-0.128935	-0.680358	-0.633732	-1.52977	-1.35926	-0.757796
5A	39994705	TuG1812G0500000448.01	TuG1812G0500000448.01.T01	comp33742_c0_seq1	96.133	181	7	0	1	181	314	494	7.78e-80	296	1.37882	1.15485	NA	NA	0	NA	-0.72526	-0.86591	0	0	NA	0
5A	40019043	TuG1812G0500000451.01	TuG1812G0500000451.01.T01	TC387174	93.558	326	14	4	1	319	2285	2610	2.17e-134	479	NA	0	NA	0	NA	0.406036	NA	NA	NA	NA	0	-2.46284
5A	40019043	TuG1812G0500000451.01	TuG1812G0500000451.01.T01	TC391349	95.372	497	21	2	1	497	1139	1633	0	789	NA	0	NA	NA	NA	1.21811	NA	NA	0	NA	NA	-0.820945
5A	40019043	TuG1812G0500000451.01	TuG1812G0500000451.01.T01	TC440429	92.489	466	11	24	1	443	1897	2361	0	647	2.06822	NA	NA	2.14785	NA	NA	-0.483507	0	0	-0.465583	0	0
5A	40019043	TuG1812G0500000451.01	TuG1812G0500000451.01.T01	comp1064_c0_seq1	99.174	363	2	1	1	362	2248	2610	0	652	0.682686	0.624078	2.92184	2.55755	11.939	1.4779	-1.4648	-1.60236	-0.342251	-0.390999	-0.083759	-0.676635
5A	40019043	TuG1812G0500000451.01	TuG1812G0500000451.01.T01	comp41098_c0_seq1	100	174	0	0	1	174	1460	1633	1.85e-87	322	0.620467	0.288714	NA	2.14785	21.3917	2.16553	-1.61169	-3.46364	0	-0.465583	-0.0467471	-0.461782
5A	40215178	TuG1812G0500000452.01	TuG1812G0500000452.01.T01	comp5637_c0_seq1	92.375	341	7	6	1	334	3228	3556	3.4e-131	468	0.546771	1.03741	4.68636	1.60287	2.00547	5.19487	-1.82892	-0.963938	-0.213385	-0.623881	-0.498635	-0.192497
5A	40618941	TuG1812G0500000456.01	TuG1812G0500000456.01.T01	comp27453_c0_seq1	98.876	89	1	0	1	89	485	573	2.76e-38	159	2.84381	1.6168	1.0634	1.47664	2.85223	0.649658	-0.351641	-0.618507	-0.940377	-0.677211	-0.350603	-1.53927
5A	40920954	TuG1812G0500000458.01	TuG1812G0500000458.01.T01	AL822226	94.2	500	23	2	4	500	64	560	0	758	0	NA	NA	NA	1.18843	0	NA	0	0	0	-0.841447	NA
5A	40920954	TuG1812G0500000458.01	TuG1812G0500000458.01.T01	TC240618	93.939	495	30	0	1	495	1117	1611	0	749	0.851621	0.756276	2.26763	0.993379	1.80641	1.28431	-1.17423	-1.32227	-0.440989	-1.00667	-0.553584	-0.778628
5A	40920954	TuG1812G0500000458.01	TuG1812G0500000458.01.T02	TC383692	99.6	500	1	1	1	499	1147	1646	0	911	2.06822	NA	NA	0	1.18843	0.812072	-0.483507	NA	0	NA	-0.841447	-1.23142
5A	40920954	TuG1812G0500000458.01	TuG1812G0500000458.01.T01	comp18424_c0_seq1	97.744	133	3	0	1	133	1205	1337	5.55e-60	230	0.861759	0.71068	0.891886	1.71828	0.792286	0.761318	-1.16042	-1.4071	-1.12122	-0.581978	-1.26217	-1.31351
5A	40920954	TuG1812G0500000458.01	TuG1812G0500000458.01.T01	comp8814_c0_seq1	98.521	338	5	0	22	359	1654	1317	4.1e-170	597	0.992747	0.844369	1.69155	1.01132	1.62334	1.04054	-1.00731	-1.18432	-0.591175	-0.988809	-0.616013	-0.961038
5A	41171215	TuG1812G0500000461.01	TuG1812G0500000461.01.T01	CV763848	90.385	364	26	6	1	357	887	1248	1.31e-131	470	0	2.30971	0.82328	2.14785	1.18843	NA	NA	-0.432955	-1.21465	-0.465583	-0.841447	0
5A	41171215	TuG1812G0500000461.01	TuG1812G0500000461.01.T01	TC260716	93.186	499	32	2	1	497	672	1170	0	732	0.846091	0.611394	1.71517	0.560308	1.51855	1.01509	-1.18191	-1.63561	-0.583034	-1.78473	-0.658524	-0.985134
5A	41171215	TuG1812G0500000461.01	TuG1812G0500000461.01.T01	TC424775	98.798	499	3	3	1	499	671	1166	0	885	1.50416	2.13204	1.18918	0.791312	0.810292	1.58354	-0.664822	-0.469035	-0.840914	-1.26372	-1.23412	-0.631496
5A	41171215	TuG1812G0500000461.01	TuG1812G0500000461.01.T01	comp13230_c0_seq3	98.246	228	3	1	1	227	923	1150	2.68e-110	398	0.827289	0.734907	1.64656	0.357974	2.37686	1.04409	-1.20877	-1.36072	-0.607327	-2.7935	-0.420724	-0.957769
5A	41171215	TuG1812G0500000461.01	TuG1812G0500000461.01.T01	comp13230_c0_seq5	95.652	161	6	1	1	160	838	998	3.18e-68	257	1.03411	3.46456	NA	2.14785	1.18843	2.03018	-0.967014	-0.288637	0	-0.465583	-0.841447	-0.492567
5A	41171215	TuG1812G0500000461.01	TuG1812G0500000461.01.T01	comp29562_c0_seq1	87.912	91	0	1	1	91	1172	1251	1.21e-19	97.1	1.37882	3.17585	0.878165	1.26344	0.950743	1.31181	-0.72526	-0.314876	-1.13874	-0.791491	-1.05181	-0.762306
5A	41720344	TuG1812G0500000464.01	TuG1812G0500000464.01.T01	TC243459	95.517	290	13	0	1	290	1649	1938	6.09e-130	464	NA	NA	NA	NA	0.594214	0.609054	NA	NA	NA	0	-1.68289	-1.64189
5A	41720344	TuG1812G0500000464.01	TuG1812G0500000464.01.T01	TC425330	99.518	415	0	1	1	415	2042	2454	0	754	2.24057	2.50218	0.274427	1.4319	0.639923	0.761318	-0.446314	-0.399651	-3.64396	-0.698374	-1.56269	-1.31351
5A	41720344	TuG1812G0500000464.01	TuG1812G0500000464.01.T01	comp20115_c0_seq1	97.551	245	2	1	1	245	2189	2429	8.52e-116	416	3.01616	1.98892	0.509649	0.743485	0.867232	1.05413	-0.331548	-0.502786	-1.96213	-1.34502	-1.15309	-0.948648
5A	41839657	TuG1812G0500000468.01	TuG1812G0500000468.01.T01	comp32680_c0_seq1	100	107	0	0	1	107	1481	1587	3.32e-50	198	2.06822	0.288714	0.548853	1.61088	3.56529	3.24829	-0.483507	-3.46364	-1.82198	-0.620777	-0.280482	-0.307854
5A	41862089	TuG1812G0500000469.01	TuG1812G0500000469.01.T01	TC373159	98.611	504	1	1	3	500	389	892	0	887	0.775583	0.425473	3.29312	0.429569	2.13917	1.59877	-1.28935	-2.35033	-0.303663	-2.32791	-0.467471	-0.625482
5A	41862089	TuG1812G0500000469.01	TuG1812G0500000469.01.T01	comp3089_c0_seq1	96.644	298	2	2	1	292	707	1002	3.68e-137	488	0.789592	0.670561	1.3142	0.952347	2.64495	1.47775	-1.26648	-1.49129	-0.76092	-1.05004	-0.378078	-0.676704
5A	43056525	TuG1812G0500000476.01	TuG1812G0500000476.01.T02	TC380938	99.202	501	3	1	1	500	668	1168	0	902	NA	NA	NA	NA	0	1.21811	0	0	0	NA	NA	-0.820945
5A	43284497	TuG1812G0500000482.01	TuG1812G0500000482.01.T01	comp12122_c0_seq1	98.773	326	4	0	1	326	1407	1732	3.95e-165	580	0.636376	0.682414	1.60082	1.38076	4.33776	1.47913	-1.5714	-1.46539	-0.624679	-0.72424	-0.230534	-0.676073
5A	44537578	TuG1812G0500000491.01	TuG1812G0500000491.01.T03	TC258884	84.568	162	19	5	7	164	713	872	4.16e-37	156	NA	NA	0.548853	6.44354	0	1.82716	0	0	-1.82198	-0.155194	NA	-0.547297
5A	44537578	TuG1812G0500000491.01	TuG1812G0500000491.01.T05	TC381201	99.618	262	1	0	1	262	1602	1863	2.17e-134	479	1.20646	2.30971	1.14344	1.67055	0.930074	1.82716	-0.828869	-0.432955	-0.874551	-0.598606	-1.07518	-0.547297
5A	44537578	TuG1812G0500000491.01	TuG1812G0500000491.01.T01	TC404912	94.422	502	24	4	1	500	302	801	0	769	NA	NA	NA	2.14785	0.396143	0	NA	NA	0	-0.465583	-2.52434	NA
5A	44537578	TuG1812G0500000491.01	TuG1812G0500000491.01.T05	comp9392_c0_seq1	99.237	131	1	0	46	176	1731	1861	1.41e-61	237	0.536206	0.35534	0.142702	0.063924	0.0418461	0.286614	-1.86496	-2.81421	-7.00762	-15.6436	-23.8971	-3.48902
5A	44537578	TuG1812G0500000491.01	TuG1812G0500000491.01.T05	comp9392_c0_seq2	99.237	131	1	0	46	176	1731	1861	1.3e-61	237	3.10233	11.9335	2.28689	17.1828	1.09701	12.0071	-0.322338	-0.0837977	-0.437275	-0.0581978	-0.911568	-0.0832843
5A	44681028	TuG1812G0500000495.01	TuG1812G0500000495.01.T01	TC384016	98.4	500	8	0	1	500	1309	1808	0	881	4.13645	0.384951	0.548853	0	0.396143	4.87243	-0.241753	-2.59773	-1.82198	NA	-2.52434	-0.205236
5A	44681028	TuG1812G0500000495.01	TuG1812G0500000495.01.T01	TC412552	99.4	500	3	0	1	500	1501	2000	0	907	1.03411	1.09512	2.43064	0.981873	1.14272	1.16735	-0.967014	-0.913141	-0.411415	-1.01846	-0.875105	-0.856638
5A	44681028	TuG1812G0500000495.01	TuG1812G0500000495.01.T01	comp5702_c0_seq1	96.783	373	11	1	14	385	2153	1781	2.71e-177	621	1.25664	1.66952	1.04968	0.805442	0.875684	1.13172	-0.795772	-0.598975	-0.95267	-1.24155	-1.14196	-0.883613
5A	44878695	TuG1812G0500000500.01	TuG1812G0500000500.01.T01	CA670327	92.814	501	19	17	1	500	1252	1736	0	726	NA	NA	0.274427	NA	0	0	NA	NA	-3.64396	0	NA	NA
5A	44878695	TuG1812G0500000500.01	TuG1812G0500000500.01.T01	TC387976	97.791	498	5	1	1	498	1693	2184	0	856	1.19321	1.31983	0.594591	1.13045	0.475371	0.487243	-0.838079	-0.757671	-1.68183	-0.884607	-2.10362	-2.05236
5A	45185264	TuG1812G0500000505.01	TuG1812G0500000505.01.T01	comp5964_c0_seq1	87.283	346	24	7	20	349	84	425	7.34e-104	377	6.27698	17.1945	0.801658	4.56722	0.485073	2.27152	-0.159312	-0.0581581	-1.24741	-0.218952	-2.06155	-0.440233
5A	45246078	TuG1812G0500000508.01	TuG1812G0500000508.01.T01	TC404518	97.59	249	6	0	1	249	890	1138	7.99e-119	427	NA	0	NA	1.07392	0.396143	1.21811	0	NA	0	-0.931165	-2.52434	-0.820945
5A	45382743	TuG1812G0500000511.01	TuG1812G0500000511.01.T01	comp11614_c0_seq1	97.632	380	9	0	23	402	922	1301	0	652	0.590921	0.948015	0.723488	0.455604	0.401288	0.401574	-1.69227	-1.05484	-1.38219	-2.19489	-2.49198	-2.4902
5A	45614138	TuG1812G0500000514.01	TuG1812G0500000514.01.T01	comp15166_c0_seq1	94.714	227	11	1	2	228	572	797	2.7e-96	351	2.06822	1.15485	22.503	12.8871	12.2804	2.82088	-0.483507	-0.86591	-0.0444386	-0.0775971	-0.0814304	-0.354499
5A	45638313	TuG1812G0500000515.01	TuG1812G0500000515.01.T02	TC242553	95.833	504	15	5	1	500	1203	1704	0	809	0.413645	NA	0.274427	0	2.37686	1.52264	-2.41753	0	-3.64396	NA	-0.420724	-0.656756
5A	45638313	TuG1812G0500000515.01	TuG1812G0500000515.01.T02	TC413134	98.597	499	4	3	1	499	1238	1733	0	880	1.21877	0.590259	1.12058	1.09677	0.612783	1.05009	-0.820497	-1.69417	-0.892399	-0.911766	-1.6319	-0.952296
5A	45638313	TuG1812G0500000515.01	TuG1812G0500000515.01.T02	comp14766_c0_seq1	98.705	386	3	1	16	401	1778	1395	0	684	1.08951	1.12757	0.762906	0.794703	0.944648	0.936564	-0.917844	-0.886859	-1.31078	-1.25833	-1.0586	-1.06773
5A	45645103	TuG1812G0500000516.01	TuG1812G0500000516.01.T01	TC416188	96.333	409	12	3	1	407	2386	2793	0	669	NA	1.15485	NA	NA	NA	NA	0	-0.86591	NA	NA	NA	0
5A	45659662	TuG1812G0500000517.01	TuG1812G0500000517.01.T01	CV778606	98.174	438	7	1	2	438	4377	4814	0	763	NA	1.15485	NA	1.07392	1.18843	0	NA	-0.86591	0	-0.931165	-0.841447	NA
5A	45659662	TuG1812G0500000517.01	TuG1812G0500000517.01.T07	TC400735	99.799	497	0	1	1	497	3970	4465	0	911	1.17199	1.31414	1.0766	1.02723	0.91608	0.974487	-0.853248	-0.760951	-0.928853	-0.973491	-1.09161	-1.02618
5A	45659662	TuG1812G0500000517.01	TuG1812G0500000517.01.T07	TC457060	97.8	500	11	0	1	500	2856	3355	0	863	1.03411	3.46456	0.274427	0	4.75371	0.406036	-0.967014	-0.288637	-3.64396	NA	-0.210362	-2.46284
5A	45763982	TuG1812G0500000522.01	TuG1812G0500000522.01.T02	TC390990	92	450	16	2	1	433	1466	1912	5.71e-175	614	NA	NA	NA	0	0	2.43622	NA	0	NA	NA	NA	-0.410473
5A	46194462	TuG1812G0500000523.01	TuG1812G0500000523.01.T01	TC261446	94.488	508	15	5	1	499	1333	1836	0	771	0	NA	0.548853	0	NA	NA	NA	NA	-1.82198	NA	NA	NA
5A	46194462	TuG1812G0500000523.01	TuG1812G0500000523.01.T01	TC372029	99.2	500	4	0	1	500	1331	1830	0	902	5.17056	0.989875	0.731804	4.29569	2.61454	1.21811	-0.193403	-1.01023	-1.36649	-0.232791	-0.382476	-0.820945
5A	46194462	TuG1812G0500000523.01	TuG1812G0500000523.01.T01	comp25947_c0_seq1	98.396	187	3	0	1	187	1651	1837	8.74e-90	329	0.387792	1.73228	1.82951	0.859138	1.58457	1.72565	-2.5787	-0.577273	-0.546594	-1.16396	-0.631086	-0.579491
5A	46333825	TuG1812G0500000525.01	TuG1812G0500000525.01.T01	CA597446	97.614	503	7	2	1	498	31	533	0	863	2.02513	2.30971	1.8661	1.56614	0.0174769	6.61259	-0.493794	-0.432955	-0.535877	-0.638513	-57.2184	-0.151227
5A	46333825	TuG1812G0500000525.01	TuG1812G0500000525.01.T01	comp12121_c0_seq1	97.63	211	0	2	1	206	323	533	5.11e-98	357	2.23368	17.0918	2.26402	2.3865	0.0742768	36.5432	-0.447692	-0.0585074	-0.441692	-0.419024	-13.4632	-0.0273648
5A	46858388	TuG1812G0500000531.01	TuG1812G0500000531.01.T03	TC390011	98.204	501	5	2	1	498	849	1348	0	872	NA	0	0.548853	0	NA	0	0	NA	-1.82198	NA	0	NA
5A	46858388	TuG1812G0500000531.01	TuG1812G0500000531.01.T03	comp5520_c0_seq1	95.918	392	10	3	10	397	1352	963	4.44e-180	630	1.24624	0.887173	0.803909	0.902916	0.679102	0.990602	-0.802416	-1.12718	-1.24392	-1.10752	-1.47253	-1.00949
5A	46976051	TuG1812G0500000532.01	TuG1812G0500000532.01.T01	TC389564	93.964	497	27	3	1	497	2544	3037	0	749	1.03411	1.15485	NA	2.14785	1.18843	0	-0.967014	-0.86591	0	-0.465583	-0.841447	NA
5A	46976051	TuG1812G0500000532.01	TuG1812G0500000532.01.T01	TC391950	99.395	496	3	0	1	496	2452	2947	0	900	1.03411	2.30971	1.92099	1.07392	0.594214	0.696062	-0.967014	-0.432955	-0.520566	-0.931165	-1.68289	-1.43665
5A	46976051	TuG1812G0500000532.01	TuG1812G0500000532.01.T01	comp10810_c0_seq1	85.938	128	10	5	18	138	2621	2747	1.62e-29	130	0.48474	0.494938	1.18003	0.621745	0.924333	1.8046	-2.06296	-2.02046	-0.847433	-1.60838	-1.08186	-0.554138
5A	46981207	TuG1812G0500000533.01	TuG1812G0500000533.01.T01	TC250004	94.939	494	19	3	1	488	145	638	0	769	0.689408	1.73228	0.548853	0	1.18843	1.21811	-1.45052	-0.577273	-1.82198	NA	-0.841447	-0.820945
5A	46981207	TuG1812G0500000533.01	TuG1812G0500000533.01.T01	TC272256	93.782	386	24	0	115	500	238	623	5.8e-165	580	1.03411	NA	NA	2.14785	0	2.43622	-0.967014	0	NA	-0.465583	NA	-0.410473
5A	46981207	TuG1812G0500000533.01	TuG1812G0500000533.01.T01	TC389001	82.353	136	14	3	1	134	616	743	3.29e-23	110	0.689408	0.421966	1.45054	0.70218	1.72862	1.26994	-1.45052	-2.36986	-0.689398	-1.42414	-0.578495	-0.787437
5A	46981207	TuG1812G0500000533.01	TuG1812G0500000533.01.T01	comp9123_c0_seq1	97.5	680	13	1	3	678	449	1128	0	1158	0.937163	0.943278	0.925392	0.653061	0.858791	0.797144	-1.06705	-1.06013	-1.08062	-1.53125	-1.16443	-1.25448
5A	47402637	TuG1812G0500000536.01	TuG1812G0500000536.01.T02	BG906814	96.543	405	13	1	96	500	13	416	0	669	NA	1.15485	NA	NA	1.18843	NA	0	-0.86591	0	NA	-0.841447	NA
5A	47402637	TuG1812G0500000536.01	TuG1812G0500000536.01.T01	TC430792	96.586	498	14	2	1	498	2268	2762	0	822	0.689408	0.769903	0.82328	0	0.396143	1.82716	-1.45052	-1.29886	-1.21465	NA	-2.52434	-0.547297
5A	47402637	TuG1812G0500000536.01	TuG1812G0500000536.01.T01	comp9766_c0_seq1	98.95	381	4	0	1	381	2451	2831	0	682	0.840215	1.34733	1.11018	0.932617	0.846755	1.02476	-1.19017	-0.742209	-0.900755	-1.07225	-1.18098	-0.975841
5A	47819929	TuG1812G0500000542.01	TuG1812G0500000542.01.T01	TC401195	97.587	373	9	0	1	373	384	756	0	640	1.55117	1.02654	3.01869	1.26344	0.396143	0.870077	-0.644676	-0.974149	-0.331269	-0.791491	-2.52434	-1.14932
5A	47819929	TuG1812G0500000542.01	TuG1812G0500000542.01.T01	comp858_c0_seq3	96.591	88	3	0	2	89	658	745	1.56e-34	147	0.855816	1.24569	0.613606	0.531368	0.421174	0.905075	-1.16848	-0.802771	-1.62971	-1.88193	-2.37432	-1.10488
5A	47819929	TuG1812G0500000542.01	TuG1812G0500000542.01.T01	comp858_c0_seq8	97.283	184	5	0	1	184	562	745	8.26e-85	313	1.12029	1.86815	0.697132	0.863299	0.48675	0.89625	-0.892628	-0.53529	-1.43445	-1.15835	-2.05444	-1.11576
5A	47988553	TuG1812G0500000545.01	TuG1812G0500000545.01.T01	TC247129	83.694	509	52	21	1	494	94	586	4.74e-126	451	4.13645	NA	2.10394	32.2177	1.40451	NA	-0.241753	0	-0.475299	-0.0310388	-0.711994	0
5A	47988553	TuG1812G0500000545.01	TuG1812G0500000545.01.T01	TC392299	92.617	447	23	2	1	443	114	554	0	634	6.20467	7.21784	3.01869	6.80151	0.99828	2.43622	-0.161169	-0.138546	-0.331269	-0.147026	-1.00172	-0.410473
5A	47988553	TuG1812G0500000545.01	TuG1812G0500000545.01.T01	comp858_c0_seq2	96.508	315	6	1	1	315	292	601	1.16e-145	516	0.712559	0.816903	0.466945	0.609251	0.373929	0.515484	-1.40339	-1.22414	-2.14158	-1.64136	-2.6743	-1.93992
5A	48069768	TuG1812G0500000546.01	TuG1812G0500000546.01.T03	TC268975	96.907	291	9	0	1	291	1867	2157	3.61e-137	488	NA	0.461942	1.92099	2.14785	0.891321	1.21811	0	-2.16477	-0.520566	-0.465583	-1.12193	-0.820945
5A	48069768	TuG1812G0500000546.01	TuG1812G0500000546.01.T01	comp27263_c0_seq1	99.526	211	1	0	2	212	1635	1845	3.07e-106	385	0.258528	1.03937	1.09771	1.19325	0.792286	0.913581	-3.86806	-0.962122	-0.91099	-0.838049	-1.26217	-1.09459
5A	48106673	TuG1812G0500000547.01	TuG1812G0500000547.01.T01	BI778412	91.068	515	31	7	1	500	688	174	0	684	1.55117	0.769903	2.46984	0.859138	0.594214	1.82716	-0.644676	-1.29886	-0.404885	-1.16396	-1.68289	-0.547297
5A	48106673	TuG1812G0500000547.01	TuG1812G0500000547.01.T01	TC381556	99	500	5	0	1	500	500	1	0	896	1.12812	1.36483	0.960493	0.805442	0.455564	0.885897	-0.886429	-0.732693	-1.04113	-1.24155	-2.19508	-1.1288
5A	48106673	TuG1812G0500000547.01	TuG1812G0500000547.01.T01	TC426537	83.7	454	38	21	1	421	506	56	2.25e-109	396	0.689408	0.824896	0.480247	1.71828	0.594214	0.870077	-1.45052	-1.21227	-2.08226	-0.581978	-1.68289	-1.14932
5A	48106673	TuG1812G0500000547.01	TuG1812G0500000547.01.T01	comp1488_c0_seq1	89.954	438	21	10	108	524	1	436	7.99e-154	544	1.1781	1.39227	0.677264	1.03116	0.523401	0.994943	-0.848823	-0.71825	-1.47653	-0.969785	-1.91058	-1.00508
5A	48128782	TuG1812G0500000549.01	TuG1812G0500000549.01.T01	comp858_c0_seq11	97.521	121	2	1	1	120	251	131	8.51e-53	206	1.52296	1.71748	0.544876	1.07392	0.56294	0.983035	-0.656614	-0.58225	-1.83528	-0.931165	-1.77639	-1.01726
5A	48128782	TuG1812G0500000549.01	TuG1812G0500000549.01.T01	comp858_c0_seq13	100	112	0	0	1	112	251	140	2.13e-53	207	1.19739	1.99475	0.684078	1.42866	0.629867	1.29586	-0.835148	-0.501316	-1.46182	-0.699958	-1.58764	-0.771688
5A	48128782	TuG1812G0500000549.01	TuG1812G0500000549.01.T01	comp858_c0_seq5	96.053	152	6	0	1	152	152	1	3.25e-65	248	0.868898	1.25866	0.520707	0.547422	0.574407	0.815832	-1.15088	-0.794495	-1.92047	-1.82674	-1.74093	-1.22574
5A	48128782	TuG1812G0500000549.01	TuG1812G0500000549.01.T01	comp858_c0_seq9	85.864	191	15	10	2	191	214	35	1.12e-48	193	NA	15.0131	NA	4.29569	0.792286	1.42113	0	-0.0666085	0	-0.232791	-1.26217	-0.703667
5A	48160999	TuG1812G0500000550.01	TuG1812G0500000550.01.T01	TC390967	87.593	403	34	8	1	398	152	543	1.32e-126	453	0.775583	1.79644	0.666465	1.89516	0.427834	0.522046	-1.28935	-0.556656	-1.50045	-0.52766	-2.33735	-1.91554
5A	48160999	TuG1812G0500000550.01	TuG1812G0500000550.01.T01	TC407182	94.236	399	22	1	1	399	110	507	2.66e-173	608	2.27504	3.46456	1.70144	2.90591	0.62005	1.4888	-0.439552	-0.288637	-0.587736	-0.344126	-1.61277	-0.671682
5A	48160999	TuG1812G0500000550.01	TuG1812G0500000550.01.T01	TC407602	98.4	500	8	0	1	500	58	557	0	880	1.21052	1.83575	0.902952	1.2788	0.641126	1.00822	-0.826092	-0.544736	-1.10748	-0.781982	-1.55976	-0.991848
5A	48160999	TuG1812G0500000550.01	TuG1812G0500000550.01.T01	comp858_c0_seq1	94.565	92	4	1	1	92	312	402	1.03e-32	141	1.4773	1.98849	0.358814	0.855291	0.369149	0.955859	-0.67691	-0.502894	-2.78696	-1.16919	-2.70893	-1.04618
5A	48160999	TuG1812G0500000550.01	TuG1812G0500000550.01.T01	comp858_c0_seq12	94.872	117	6	0	2	118	411	527	3.86e-46	183	1.58564	0.995564	0.223874	0.644354	0.371384	0.597112	-0.630661	-1.00446	-4.46679	-1.55194	-2.69263	-1.67473
5A	48160999	TuG1812G0500000550.01	TuG1812G0500000550.01.T01	comp858_c0_seq14	96.25	80	2	1	31	109	425	504	4.57e-30	130	1.24093	1.37139	0.351266	0.937242	0.537622	1.06584	-0.805845	-0.729187	-2.84685	-1.06696	-1.86004	-0.938223
5A	48160999	TuG1812G0500000550.01	TuG1812G0500000550.01.T01	comp858_c0_seq4	93.878	294	17	1	1	294	134	426	1.77e-123	442	1.19649	1.49959	0.848228	0.723993	0.476146	0.719558	-0.835776	-0.66685	-1.17893	-1.38123	-2.1002	-1.38974
5A	48160999	TuG1812G0500000550.01	TuG1812G0500000550.01.T01	comp858_c0_seq6	99.138	116	1	0	1	116	446	561	1.29e-53	209	0.603232	2.54068	0.470446	0.668219	0.328714	1.05922	-1.65774	-0.393595	-2.12564	-1.49652	-3.04216	-0.944087
5A	48251758	TuG1812G0500000551.01	TuG1812G0500000551.01.T03	CD909320	99.203	502	2	2	1	500	535	1036	0	904	2.06822	NA	NA	NA	1.18843	NA	-0.483507	0	0	NA	-0.841447	0
5A	48382752	TuG1812G0500000552.01	TuG1812G0500000552.01.T02	BU101138	97.468	395	10	0	1	395	906	1300	0	675	NA	0.384951	NA	0	2.37686	1.21811	NA	-2.59773	0	NA	-0.420724	-0.820945
5A	48382752	TuG1812G0500000552.01	TuG1812G0500000552.01.T01	TC251072	93.333	180	5	4	3	182	1855	2027	3.08e-68	259	NA	1.73228	1.37213	0	2.37686	2.43622	NA	-0.577273	-0.728792	NA	-0.420724	-0.410473
5A	48382752	TuG1812G0500000552.01	TuG1812G0500000552.01.T01	TC391347	98.193	166	1	2	1	165	2302	2466	3.93e-77	289	NA	NA	NA	2.14785	1.18843	0.609054	NA	NA	NA	-0.465583	-0.841447	-1.64189
5A	48382752	TuG1812G0500000552.01	TuG1812G0500000552.01.T01	TC432818	97.712	437	8	2	1	435	1588	2024	0	750	0.443191	2.88714	NA	0.644354	0.108039	0.609054	-2.25637	-0.346364	0	-1.55194	-9.25592	-1.64189
5A	48382752	TuG1812G0500000552.01	TuG1812G0500000552.01.T01	comp21505_c0_seq1	97.656	256	3	2	1	256	1792	2044	7.07e-122	436	1.03411	1.51955	0.891886	0.523865	0.718585	0.974487	-0.967014	-0.658092	-1.12122	-1.90889	-1.39162	-1.02618
5A	48382752	TuG1812G0500000552.01	TuG1812G0500000552.01.T01	comp7527_c0_seq1	96.681	452	14	1	1	451	2088	2539	0	750	0.517056	1.73228	NA	0.805442	0.237686	0.812072	-1.93403	-0.577273	0	-1.24155	-4.20724	-1.23142
5A	48382752	TuG1812G0500000552.01	TuG1812G0500000552.01.T01	comp7527_c0_seq2	96.689	453	14	1	1	452	2088	2540	0	752	2.06822	NA	NA	NA	0.792286	0	-0.483507	0	0	NA	-1.26217	NA
5A	48520666	TuG1812G0500000553.01	TuG1812G0500000553.01.T01	BE445524	97.773	449	10	0	4	452	1046	1494	0	774	NA	NA	0	1.07392	0.594214	0	NA	0	NA	-0.931165	-1.68289	NA
5A	48520666	TuG1812G0500000553.01	TuG1812G0500000553.01.T01	comp13238_c0_seq1	96.04	404	13	1	1	404	1801	2201	0	654	1.41712	0.878694	0.563297	0.568548	0.615186	1.01197	-0.705659	-1.13805	-1.77526	-1.75887	-1.62552	-0.988175
5A	48532132	TuG1812G0500000555.01	TuG1812G0500000555.01.T01	AJ434565	99.119	454	4	0	32	485	881	1334	0	817	NA	NA	NA	NA	NA	1.21811	NA	NA	0	0	NA	-0.820945
5A	48532132	TuG1812G0500000555.01	TuG1812G0500000555.01.T01	TC257592	92.829	516	20	7	1	500	1271	1785	0	732	0.770083	0.569728	1.18918	0.578266	2.03731	1.09423	-1.29856	-1.75522	-0.840914	-1.72931	-0.490844	-0.913882
5A	48532132	TuG1812G0500000555.01	TuG1812G0500000555.01.T01	TC416913	98.974	390	4	0	1	390	1347	1736	0	699	0.70755	0.329958	2.33263	0.379032	2.37686	0.798071	-1.41333	-3.03068	-0.428701	-2.6383	-0.420724	-1.25302
5A	48594030	TuG1812G0500000561.01	TuG1812G0500000561.01.T01	TC263354	94.411	501	21	2	1	500	137	631	0	763	0	0	0.274427	0	NA	NA	NA	NA	-3.64396	NA	NA	NA
5A	48594030	TuG1812G0500000561.01	TuG1812G0500000561.01.T01	TC380265	96.177	497	19	0	1	497	1259	1755	0	813	NA	3.46456	1.09771	4.29569	1.18843	0.406036	0	-0.288637	-0.91099	-0.232791	-0.841447	-2.46284
5A	48594030	TuG1812G0500000561.01	TuG1812G0500000561.01.T01	TC397517	94.49	490	5	15	1	474	386	869	0	743	1.55117	NA	NA	0.859138	0	1.21811	-0.644676	0	0	-1.16396	NA	-0.820945
5A	48594030	TuG1812G0500000561.01	TuG1812G0500000561.01.T01	TC416285	98.371	491	8	0	1	491	1293	1783	0	865	1.03411	2.30971	NA	0	0.594214	0.609054	-0.967014	-0.432955	0	NA	-1.68289	-1.64189
5A	48594030	TuG1812G0500000561.01	TuG1812G0500000561.01.T01	comp1396_c0_seq1	95.989	374	13	1	22	395	1469	1840	7.45e-173	606	1.01012	1.21929	0.652835	0.633244	0.466883	0.905148	-0.989977	-0.82015	-1.53178	-1.57917	-2.14187	-1.10479
5A	48594030	TuG1812G0500000561.01	TuG1812G0500000561.01.T01	comp41739_c0_seq1	100	89	0	0	1	89	471	559	1.4e-40	165	1.03411	0	NA	NA	NA	NA	-0.967014	NA	NA	NA	NA	NA
5A	48678602	TuG1812G0500000562.01	TuG1812G0500000562.01.T01	CA696045	94.602	389	11	10	36	414	14	402	3.44e-172	604	0	NA	NA	4.29569	1.18843	0.609054	NA	0	0	-0.232791	-0.841447	-1.64189
5A	48678602	TuG1812G0500000562.01	TuG1812G0500000562.01.T01	CA697518	93.367	392	18	6	6	392	14	402	7.5e-164	577	NA	2.30971	NA	0.429569	1.18843	0.609054	0	-0.432955	0	-2.32791	-0.841447	-1.64189
5A	48678602	TuG1812G0500000562.01	TuG1812G0500000562.01.T01	CK194855	98.429	191	2	1	1	191	733	544	4.98e-91	335	0	NA	NA	NA	NA	1.21811	NA	NA	0	NA	NA	-0.820945
5A	48678602	TuG1812G0500000562.01	TuG1812G0500000562.01.T01	TC422627	99.148	352	2	1	1	351	365	14	1.58e-180	632	2.01263	1.80197	1.36603	1.10327	1.14495	1.61662	-0.496863	-0.554948	-0.732046	-0.9064	-0.873401	-0.618573
5A	48678602	TuG1812G0500000562.01	TuG1812G0500000562.01.T01	TC441771	92.182	307	6	10	1	307	121	409	4.81e-116	418	1.9678	1.93103	1.11946	1.29135	0.996719	1.94466	-0.508182	-0.517858	-0.893285	-0.774381	-1.00329	-0.514228
5A	48678602	TuG1812G0500000562.01	TuG1812G0500000562.01.T01	TC444235	99.49	196	1	0	263	458	544	739	9.69e-98	357	1.71921	1.65021	1.19765	1.11083	1.05476	1.67755	-0.581662	-0.605983	-0.834967	-0.900225	-0.948086	-0.596108
5A	48678602	TuG1812G0500000562.01	TuG1812G0500000562.01.T01	comp19871_c0_seq1	95.161	186	9	0	1	186	373	188	2.9e-79	294	1.18184	3.13461	1.09771	4.83265	0.848877	2.92346	-0.846137	-0.319019	-0.91099	-0.206926	-1.17803	-0.34206
5A	48678602	TuG1812G0500000562.01	TuG1812G0500000562.01.T01	comp990_c0_seq1	99.545	220	0	1	310	529	761	543	2.37e-110	399	1.90115	1.81851	1.21858	1.20615	1.0524	1.58828	-0.525998	-0.549902	-0.820626	-0.829083	-0.950213	-0.629614
5A	49101509	TuG1812G0500000565.01	TuG1812G0500000565.01.T01	CA613354	96.887	257	4	1	1	257	3851	4103	4.54e-119	427	0.258528	1.44357	0.82328	1.07392	1.18843	0.696062	-3.86806	-0.692728	-1.21465	-0.931165	-0.841447	-1.43665
5A	49101509	TuG1812G0500000565.01	TuG1812G0500000565.01.T01	TC379010	98.283	466	6	2	1	465	3707	4171	0	815	1.95332	2.18139	0.713509	1.20816	0.768983	0.953302	-0.511949	-0.458423	-1.40152	-0.827703	-1.30042	-1.04899
5A	49101509	TuG1812G0500000565.01	TuG1812G0500000565.01.T01	comp31197_c0_seq1	98.089	157	3	0	1	157	3874	4030	3.09e-73	274	1.2823	0.759773	0.800411	0.787544	1.04438	1.57175	-0.77985	-1.31618	-1.24936	-1.26977	-0.957509	-0.636233
5A	49496306	TuG1812G0500000568.01	TuG1812G0500000568.01.T01	TC415929	91.714	350	23	4	154	499	1738	2085	6.05e-135	481	NA	NA	NA	NA	0	1.21811	0	NA	NA	NA	NA	-0.820945
5A	49496306	TuG1812G0500000568.01	TuG1812G0500000568.01.T01	comp13078_c0_seq1	96.473	482	1	2	43	517	2465	1993	0	782	1.58158	1.24926	1.19924	0.910796	1.00109	0.992447	-0.632278	-0.800476	-0.833858	-1.09794	-0.998911	-1.00761
5A	49514430	TuG1812G0500000571.01	TuG1812G0500000571.01.T02	TC444686	96.222	450	15	1	9	456	742	1191	0	736	0.738651	2.30971	NA	1.07392	0.891321	0.406036	-1.35382	-0.432955	0	-0.931165	-1.12193	-2.46284
5A	49514430	TuG1812G0500000571.01	TuG1812G0500000571.01.T02	comp42376_c0_seq1	89.683	126	12	1	1	126	880	1004	6.92e-39	159	0	0	NA	2.14785	NA	NA	NA	NA	NA	-0.465583	NA	NA
5A	50057361	TuG1812G0500000577.01	TuG1812G0500000577.01.T01	comp40710_c0_seq1	100	138	0	0	1	138	197	60	9.58e-68	255	NA	0.577427	1.09771	0	2.37686	NA	NA	-1.73182	-0.91099	NA	-0.420724	0
5A	50306725	TuG1812G0500000578.01	TuG1812G0500000578.01.T04	comp11450_c0_seq1	91.86	344	3	2	95	413	2040	1697	8.32e-128	457	1.26391	1.27859	1.04625	0.722457	1.20366	1.36666	-0.791193	-0.782112	-0.955793	-1.38416	-0.830796	-0.731712
5A	51041646	TuG1812G0500000581.01	TuG1812G0500000581.01.T01	TC385034	98	500	6	1	1	500	1384	1879	0	865	7.75583	4.61942	0.137213	0.214785	0.339551	1.70535	-0.128935	-0.216477	-7.28792	-4.65583	-2.94507	-0.586389
5A	51041646	TuG1812G0500000581.01	TuG1812G0500000581.01.T01	comp7252_c0_seq1	95.531	358	13	1	1	358	1525	1879	1.2e-161	569	3.06151	2.99771	0.338745	0.953914	0.491577	1.33832	-0.326636	-0.333588	-2.95207	-1.04831	-2.03427	-0.747208
5A	51045250	TuG1812G0500000583.01	TuG1812G0500000583.01.T02	TC414965	98.6	500	7	0	1	500	2219	2718	0	885	0.517056	NA	NA	0	0.297107	0	-1.93403	NA	0	NA	-3.36579	NA
5A	51072869	TuG1812G0500000585.01	TuG1812G0500000585.01.T01	CA648578	90.403	521	18	28	1	495	741	1255	0	665	1.03411	1.15485	NA	0.715949	2.37686	0.406036	-0.967014	-0.86591	0	-1.39675	-0.420724	-2.46284
5A	51072869	TuG1812G0500000585.01	TuG1812G0500000585.01.T01	TC249614	87.978	366	17	4	159	500	914	1276	1.04e-112	407	0.517056	6.15922	1.64656	1.07392	1.48554	1.33992	-1.93403	-0.162358	-0.607327	-0.931165	-0.673158	-0.746314
5A	51072869	TuG1812G0500000585.01	TuG1812G0500000585.01.T01	comp24510_c0_seq1	97.826	46	1	0	3	48	1283	1328	1.38e-14	80.5	1.37882	0.769903	1.23492	0.859138	0.713057	1.21811	-0.72526	-1.29886	-0.809769	-1.16396	-1.40241	-0.820945
5A	51072869	TuG1812G0500000585.01	TuG1812G0500000585.01.T01	comp2588_c0_seq1	95.202	396	6	2	1	384	910	1304	4.51e-175	614	1.49745	1.41944	0.782051	0.833448	0.668276	1.36821	-0.667803	-0.704501	-1.27869	-1.19983	-1.49639	-0.730884
5A	51078745	TuG1812G0500000587.01	TuG1812G0500000587.01.T01	CD895380	99.2	500	3	1	1	500	175	673	0	900	3.10233	0.384951	NA	1.4319	0.792286	0.812072	-0.322338	-2.59773	0	-0.698374	-1.26217	-1.23142
5A	51078745	TuG1812G0500000587.01	TuG1812G0500000587.01.T01	TC240039	91.885	419	14	3	1	399	812	1230	4.51e-161	568	1.50416	2.07874	0.33541	0.653692	0.509326	2.07078	-0.664822	-0.481061	-2.98142	-1.52977	-1.96338	-0.482909
5A	51078745	TuG1812G0500000587.01	TuG1812G0500000587.01.T01	TC429623	97.704	392	1	1	1	392	872	1255	0	667	1.80012	2.2595	0.431242	0.941522	0.355163	1.54294	-0.555519	-0.442576	-2.31888	-1.06211	-2.81561	-0.648115
5A	51078745	TuG1812G0500000587.01	TuG1812G0500000587.01.T01	comp15205_c0_seq1	100	105	0	0	1	105	1151	1255	3.61e-49	195	2.58528	2.6744	0.63667	0.689432	0.824909	1.87792	-0.386806	-0.373916	-1.57067	-1.45047	-1.21225	-0.532505
5A	51159632	TuG1812G0500000588.01	TuG1812G0500000588.01.T01	TC420455	97.8	500	4	5	1	500	1664	2156	0	856	0.517056	0.543461	0.788976	0.715949	0.737645	1.15044	-1.93403	-1.84006	-1.26746	-1.39675	-1.35567	-0.869236
5A	51516150	TuG1812G0500000600.01	TuG1812G0500000600.01.T01	TC417847	99.2	500	4	0	1	500	782	1281	0	902	11.3752	3.69553	0.503115	0.747077	0.206683	1.55032	-0.0879104	-0.270597	-1.98762	-1.33855	-4.83832	-0.645028
5A	51516150	TuG1812G0500000600.01	TuG1812G0500000600.01.T01	comp6628_c0_seq1	99.095	221	2	0	1	221	946	1166	1.04e-109	398	5.58645	4.09448	0.480595	0.651532	0.482685	1.95518	-0.179005	-0.244231	-2.08075	-1.53484	-2.07175	-0.511462
5A	52120814	TuG1812G0500000605.01	TuG1812G0500000605.01.T01	TC240391	92.615	501	33	1	1	497	277	777	0	717	1.03411	1.73228	0.137213	0	0	2.43622	-0.967014	-0.577273	-7.28792	NA	NA	-0.410473
5A	52120814	TuG1812G0500000605.01	TuG1812G0500000605.01.T02	TC370528	99.639	277	1	0	1	277	317	593	9.98e-143	507	1.41329	0.842081	0.340289	0.289133	0.322943	0.56845	-0.707571	-1.18753	-2.93868	-3.45861	-3.09653	-1.75917
5A	52120814	TuG1812G0500000605.01	TuG1812G0500000605.01.T02	TC381056	96.233	292	7	1	1	288	442	733	2.81e-133	475	NA	NA	NA	2.14785	NA	NA	NA	0	0	-0.465583	0	0
5A	52120814	TuG1812G0500000605.01	TuG1812G0500000605.01.T01	TC430505	91.118	304	9	18	32	335	6	291	6.26e-110	398	NA	NA	NA	1.07392	NA	NA	NA	NA	NA	-0.931165	NA	NA
5A	52120814	TuG1812G0500000605.01	TuG1812G0500000605.01.T02	TC431648	100	220	0	0	11	230	430	649	9.55e-113	407	NA	0	0.0914755	0	0	0	NA	NA	-10.9319	NA	NA	NA
5A	52120814	TuG1812G0500000605.01	TuG1812G0500000605.01.T02	comp6877_c0_seq1	99.744	390	1	0	23	412	701	312	0	715	1.1297	1.04684	0.497281	0.454484	0.347373	0.706803	-0.88519	-0.955257	-2.01094	-2.2003	-2.87875	-1.41482
5A	52790529	TuG1812G0500000607.01	TuG1812G0500000607.01.T01	TC401781	99.4	500	3	0	1	500	96	595	0	907	3.10233	2.88714	0.548853	1.22734	0.950743	1.21811	-0.322338	-0.346364	-1.82198	-0.81477	-1.05181	-0.820945
5A	52920069	TuG1812G0500000610.01	TuG1812G0500000610.01.T01	TC378696	97.938	194	4	0	1	194	347	540	1.39e-91	337	1.86367	1.22985	0.972967	0.874728	1.0223	1.48007	-0.536575	-0.813111	-1.02778	-1.14321	-0.978183	-0.675645
5A	53211412	TuG1812G0500000612.01	TuG1812G0500000612.01.T01	TC387028	84.588	279	41	2	9	286	351	628	3.06e-73	276	NA	0.577427	0.457378	0.61367	0	0.913581	0	-1.73182	-2.18638	-1.62954	NA	-1.09459
5A	53272991	TuG1812G0500000616.01	TuG1812G0500000616.01.T01	TC386290	86.288	423	47	7	3	425	1629	1218	1.71e-125	449	2.06822	NA	NA	NA	NA	NA	-0.483507	NA	NA	NA	NA	NA
5A	53272991	TuG1812G0500000616.01	TuG1812G0500000616.01.T01	comp7989_c0_seq1	98.016	252	5	0	1	252	1457	1206	3.78e-122	438	3.07192	3.17585	0.502	0.786416	0.558496	0.765547	-0.325529	-0.314876	-1.99203	-1.27159	-1.79052	-1.30626
5A	53279655	TuG1812G0500000617.01	TuG1812G0500000617.01.T01	comp17428_c0_seq1	83.448	145	21	2	4	148	749	890	6.72e-30	132	0.590921	0.192476	0.0914755	0	0	0	-1.69227	-5.19546	-10.9319	NA	NA	NA
5A	53279655	TuG1812G0500000617.01	TuG1812G0500000617.01.T01	comp17428_c0_seq2	84.444	135	18	2	4	138	749	880	1.64e-29	130	0.775583	1.15485	0.548853	0	0	0	-1.28935	-0.86591	-1.82198	NA	NA	NA
5A	53279655	TuG1812G0500000617.01	TuG1812G0500000617.01.T01	comp19906_c0_seq1	98.281	349	6	0	1	349	1363	1711	1.49e-174	612	6.68725	7.1068	0.198723	0.655275	0.369908	1.0535	-0.149538	-0.14071	-5.03214	-1.52608	-2.70337	-0.949218
5A	53338151	TuG1812G0500000619.01	TuG1812G0500000619.01.T01	TC375167	97.4	500	9	4	1	500	2164	2659	0	848	NA	NA	NA	2.14785	NA	3.65432	0	0	NA	-0.465583	0	-0.273648
5A	53356956	TuG1812G0500000621.01	TuG1812G0500000621.01.T01	BJ464262	97.8	500	11	0	1	500	343	842	0	863	0.206822	0	NA	0	0.297107	0	-4.83507	NA	NA	NA	-3.36579	NA
5A	53356956	TuG1812G0500000621.01	TuG1812G0500000621.01.T01	comp9075_c0_seq1	99.052	211	2	0	1	211	2016	2226	1.71e-104	379	0.454	0.2794	0.274427	0.0965324	0.105638	0.0870077	-2.20264	-3.57909	-3.64396	-10.3592	-9.46628	-11.4932
5A	53398603	TuG1812G0500000623.01	TuG1812G0500000623.01.T01	comp4736_c0_seq1	94.273	227	12	1	254	480	228	3	2.43e-94	346	2.37463	2.11413	0.388771	0.511827	0.329922	1.0975	-0.421119	-0.473008	-2.57221	-1.95378	-3.03102	-0.911159
5A	53509468	TuG1812G0500000624.01	TuG1812G0500000624.01.T01	TC371947	98.73	315	2	1	1	313	1814	2128	2.72e-158	558	NA	5.77427	NA	NA	NA	NA	NA	-0.173182	0	0	NA	0
5A	53510803	TuG1812G0500000625.01	TuG1812G0500000625.01.T01	comp22153_c0_seq1	96	100	4	0	1	100	129	30	1.77e-39	163	0.574506	0.153981	NA	1.71828	2.67396	0.609054	-1.74063	-6.49432	0	-0.581978	-0.373977	-1.64189
5A	53515158	TuG1812G0500000627.01	TuG1812G0500000627.01.T01	TC400179	96.951	328	3	7	1	326	670	992	7.6e-154	544	0	1.73228	NA	NA	1.18843	NA	NA	-0.577273	0	0	-0.841447	0
5A	53515422	TuG1812G0500000626.01	TuG1812G0500000626.01.T01	TC239923	91.317	357	14	6	150	499	361	15	3.64e-132	472	0.775583	0.577427	NA	10.7392	0.475371	0.761318	-1.28935	-1.73182	0	-0.0931165	-2.10362	-1.31351
5A	53515422	TuG1812G0500000626.01	TuG1812G0500000626.01.T01	comp5217_c0_seq1	99.718	355	1	0	66	420	361	7	0	651	0.40526	0.365704	1.79902	0.592509	1.03228	0.458092	-2.46755	-2.73445	-0.555859	-1.68774	-0.968725	-2.18297
5A	53518816	TuG1812G0500000628.01	TuG1812G0500000628.01.T01	comp26017_c0_seq1	99.412	340	2	0	1	340	657	996	3.19e-176	617	0.114901	0.824896	0.0392038	0	0	0	-8.70313	-1.21227	-25.5077	NA	NA	NA
5A	54191953	TuG1812G0500000629.01	TuG1812G0500000629.01.T01	comp18280_c0_seq1	90.805	174	10	4	1	172	1825	1994	7.18e-59	228	1.83842	1.70189	0.168016	0.405254	0.147583	0.798071	-0.543945	-0.587582	-5.9518	-2.46759	-6.77587	-1.25302
5A	54407954	TuG1812G0500000632.01	TuG1812G0500000632.01.T01	comp6968_c0_seq1	98.465	391	6	0	1	391	2014	2404	0	689	7.44288	18.4285	0.0952555	0.397749	0.157114	1.03071	-0.134357	-0.0542637	-10.4981	-2.51415	-6.36479	-0.970208
5A	54619971	TuG1812G0500000633.01	TuG1812G0500000633.01.T01	TC392430	100	194	0	0	1	194	537	730	2.96e-98	359	3.10233	4.61942	NA	2.14785	0.237686	0.609054	-0.322338	-0.216477	0	-0.465583	-4.20724	-1.64189
5A	54624750	TuG1812G0500000634.01	TuG1812G0500000634.01.T01	TC378538	96.244	426	6	10	1	416	770	1195	0	689	0	2.30971	0.274427	NA	2.97107	0.406036	NA	-0.432955	-3.64396	0	-0.336579	-2.46284
5A	54624750	TuG1812G0500000634.01	TuG1812G0500000634.01.T01	TC390615	99.102	334	3	0	1	334	1215	1548	4.45e-171	601	0	0	NA	2.14785	0	NA	NA	NA	0	-0.465583	NA	NA
5A	54624750	TuG1812G0500000634.01	TuG1812G0500000634.01.T01	TC398399	94.77	478	16	2	1	478	1071	1539	0	736	5.17056	0.384951	0.82328	0.357974	NA	0.609054	-0.193403	-2.59773	-1.21465	-2.7935	0	-1.64189
5A	54624750	TuG1812G0500000634.01	TuG1812G0500000634.01.T01	TC456090	99.192	495	1	3	1	495	258	749	0	889	NA	NA	NA	NA	NA	1.21811	NA	NA	0	NA	NA	-0.820945
5A	56189449	TuG1812G0500000641.01	TuG1812G0500000641.01.T02	TC433868	99.8	500	1	0	1	500	951	1450	0	918	NA	NA	NA	NA	10.6959	NA	0	0	0	0	-0.0934942	0
5A	57079494	TuG1812G0500000644.01	TuG1812G0500000644.01.T01	comp47424_c0_seq1	84.286	70	8	3	1	68	540	608	1.28e-10	65.8	0	NA	NA	2.14785	NA	NA	NA	NA	0	-0.465583	NA	NA
5A	57114404	TuG1812G0500000645.01	TuG1812G0500000645.01.T01	CD903196	99.6	500	2	0	1	500	1032	1531	0	913	3.51598	2.18139	0.914755	0.536962	0.198071	1.72565	-0.284416	-0.458423	-1.09319	-1.86233	-5.04868	-0.579491
5A	57114404	TuG1812G0500000645.01	TuG1812G0500000645.01.T01	TC402559	93.387	499	24	4	1	491	727	1224	0	730	NA	2.30971	NA	0.536962	0	1.21811	0	-0.432955	0	-1.86233	NA	-0.820945
5A	57114404	TuG1812G0500000645.01	TuG1812G0500000645.01.T01	comp26421_c0_seq1	97.122	139	4	0	1	139	1326	1464	1.27e-61	235	12.4093	6.92913	2.46984	0.585776	0.237686	2.43622	-0.0805845	-0.144318	-0.404885	-1.70714	-4.20724	-0.410473
5A	57125324	TuG1812G0500000647.01	TuG1812G0500000647.01.T02	CK161948	91.884	345	21	7	1	338	2219	2563	2.81e-133	475	4.13645	1.15485	0.548853	2.14785	4.75371	NA	-0.241753	-0.86591	-1.82198	-0.465583	-0.210362	0
5A	57125324	TuG1812G0500000647.01	TuG1812G0500000647.01.T02	TC242349	93.362	467	29	2	1	467	2081	2545	0	689	2.06822	NA	NA	1.07392	0	NA	-0.483507	0	0	-0.931165	NA	NA
5A	57125324	TuG1812G0500000647.01	TuG1812G0500000647.01.T02	TC374833	98.333	300	1	4	1	299	2255	2551	9.91e-148	523	2.62505	2.43803	1.59666	0.61367	0.636658	1.94897	-0.380945	-0.410168	-0.626306	-1.62954	-1.5707	-0.513091
5A	57125324	TuG1812G0500000647.01	TuG1812G0500000647.01.T02	comp11262_c0_seq1	96.744	215	5	2	1	214	2303	2516	5.37e-98	357	2.693	2.73995	1.73575	0.56814	0.673443	1.25871	-0.371333	-0.36497	-0.57612	-1.76013	-1.48491	-0.794463
5A	57266617	TuG1812G0500000650.01	TuG1812G0500000650.01.T01	TC250587	80.534	262	18	20	1	257	644	877	1.49e-41	171	3.10233	1.92476	NA	1.07392	2.37686	2.43622	-0.322338	-0.519546	NA	-0.931165	-0.420724	-0.410473
5A	57266617	TuG1812G0500000650.01	TuG1812G0500000650.01.T01	TC370858	97.699	478	10	1	1	478	400	876	0	821	5.17056	4.61942	0.731804	1.4319	0.891321	1.21811	-0.193403	-0.216477	-1.36649	-0.698374	-1.12193	-0.820945
5A	57266617	TuG1812G0500000650.01	TuG1812G0500000650.01.T01	TC412153	97	500	13	2	1	500	555	1052	0	839	NA	NA	8.64444	62.2875	NA	NA	0	0	-0.115681	-0.0160546	0	0
5A	57266617	TuG1812G0500000650.01	TuG1812G0500000650.01.T01	comp1128_c0_seq1	98.635	513	3	2	73	581	1053	541	0	905	1.11353	1.15485	0.833081	0.805208	0.75637	0.933237	-0.898049	-0.86591	-1.20036	-1.24191	-1.3221	-1.07154
5A	57271146	TuG1812G0500000651.01	TuG1812G0500000651.01.T01	TC265480	92.008	488	26	8	1	482	735	1215	0	673	0.206822	0.384951	1.37213	0.477299	0.198071	0.812072	-4.83507	-2.59773	-0.728792	-2.09512	-5.04868	-1.23142
5A	57271146	TuG1812G0500000651.01	TuG1812G0500000651.01.T01	TC375610	96.607	501	12	3	1	500	729	1225	0	826	0.914791	0.785301	1.13201	0.754649	0.724651	1.0535	-1.09315	-1.2734	-0.883385	-1.32512	-1.37997	-0.949218
5A	57550510	TuG1812G0500000652.01	TuG1812G0500000652.01.T01	comp14555_c0_seq1	91.534	189	4	2	1	182	4950	5133	6.49e-66	250	2.24057	0.399757	2.92722	0.859138	3.11962	0.957085	-0.446314	-2.50152	-0.341621	-1.16396	-0.320551	-1.04484
5A	57709611	TuG1812G0500000653.01	TuG1812G0500000653.01.T01	TC243828	86.531	490	41	17	1	478	2518	2994	1.66e-145	516	NA	0	NA	0	1.18843	NA	NA	NA	0	NA	-0.841447	0
5A	57709611	TuG1812G0500000653.01	TuG1812G0500000653.01.T01	TC276518	98.4	500	8	0	1	500	1104	1603	0	880	NA	0.384951	NA	0	0.594214	NA	NA	-2.59773	0	NA	-1.68289	0
5A	57709611	TuG1812G0500000653.01	TuG1812G0500000653.01.T01	TC426489	82.772	505	13	70	1	433	1764	2266	1.36e-106	387	NA	NA	NA	2.14785	1.18843	NA	0	0	0	-0.465583	-0.841447	NA
5A	57709611	TuG1812G0500000653.01	TuG1812G0500000653.01.T01	comp7203_c0_seq1	98.753	401	4	1	27	427	3011	2612	0	712	0.627067	0.745406	0.729397	0.399865	0.412748	0.65119	-1.59472	-1.34155	-1.371	-2.50084	-2.42279	-1.53565
5A	57716621	TuG1812G0500000654.01	TuG1812G0500000654.01.T01	TC426827	99	500	2	3	1	500	867	1363	0	893	1.48654	1.25528	0.640329	0.954598	0.450783	0.947417	-0.672705	-0.796637	-1.5617	-1.04756	-2.21836	-1.0555
5A	57716621	TuG1812G0500000654.01	TuG1812G0500000654.01.T01	comp13522_c0_seq1	96.886	289	8	1	60	348	1133	1420	1.15e-135	483	0.344704	5.77427	0.82328	0	0	6.09054	-2.90104	-0.173182	-1.21465	NA	NA	-0.164189
5A	57716621	TuG1812G0500000654.01	TuG1812G0500000654.01.T01	comp13522_c0_seq3	98.175	274	4	1	60	333	1133	1405	5.09e-134	477	NA	NA	NA	NA	1.18843	NA	NA	NA	0	NA	-0.841447	NA
5A	57975899	TuG1812G0500000656.01	TuG1812G0500000656.01.T01	TC394126	99.4	500	3	0	1	500	1993	2492	0	907	0.775583	1.15485	NA	2.86379	0.495179	0.870077	-1.28935	-0.86591	0	-0.349187	-2.01947	-1.14932
5A	57975899	TuG1812G0500000656.01	TuG1812G0500000656.01.T01	comp24904_c0_seq1	93.363	226	0	3	1	213	2334	2557	6.44e-87	320	0.827289	0.192476	2.74427	2.86379	1.98071	0.913581	-1.20877	-5.19546	-0.364396	-0.349187	-0.504868	-1.09459
5A	58059188	TuG1812G0500000657.01	TuG1812G0500000657.01.T01	TC373415	94.815	405	14	6	1	403	2189	2588	2.64e-178	625	2.06822	0	NA	0.357974	0.297107	3.65432	-0.483507	NA	0	-2.7935	-3.36579	-0.273648
5A	59641166	TuG1812G0500000663.01	TuG1812G0500000663.01.T01	comp26801_c0_seq1	97.786	271	5	1	1	270	1261	1531	9.16e-131	466	0	0.192476	NA	0	0	0	NA	-5.19546	NA	NA	NA	NA
5A	59649219	TuG1812G0500000665.01	TuG1812G0500000665.01.T01	comp26912_c0_seq1	99.718	354	1	0	15	368	474	827	0	649	2.75763	0.839894	0.82328	0.894936	0.822758	2.43622	-0.36263	-1.19063	-1.21465	-1.1174	-1.21542	-0.410473
5A	59715871	TuG1812G0500000667.01	TuG1812G0500000667.01.T01	comp12285_c0_seq1	92.124	419	5	5	1	406	504	907	1.3e-160	566	1.21067	1.05862	0.754673	1.01426	0.802189	1.28771	-0.825991	-0.944629	-1.32508	-0.98594	-1.24659	-0.77657
5A	60121086	TuG1812G0500000668.01	TuG1812G0500000668.01.T01	TC242881	90.993	433	15	10	3	435	475	67	2.1e-159	562	2.21595	1.84777	0.41164	0.536962	NA	2.43622	-0.451273	-0.541194	-2.42931	-1.86233	0	-0.410473
5A	60121086	TuG1812G0500000668.01	TuG1812G0500000668.01.T01	TC384642	98.913	460	2	1	1	457	460	1	0	819	3.70557	2.57621	1.73804	0.596624	1.98071	1.52264	-0.269864	-0.388167	-0.575362	-1.6761	-0.504868	-0.656756
5A	60550015	TuG1812G0500000672.01	TuG1812G0500000672.01.T03	TC251886	94.4	500	28	0	1	500	634	1133	0	769	2.58528	2.30971	0.0914755	1.61088	0	1.82716	-0.386806	-0.432955	-10.9319	-0.620777	NA	-0.547297
5A	60550015	TuG1812G0500000672.01	TuG1812G0500000672.01.T04	TC256321	93.496	492	29	3	9	500	1680	2168	0	728	NA	0	0.274427	NA	2.37686	NA	NA	NA	-3.64396	NA	-0.420724	NA
5A	60550015	TuG1812G0500000672.01	TuG1812G0500000672.01.T04	TC275048	94.606	482	14	7	1	481	756	1226	0	736	4.13645	0	0.137213	0	1.18843	NA	-0.241753	NA	-7.28792	NA	-0.841447	0
5A	60550015	TuG1812G0500000672.01	TuG1812G0500000672.01.T03	TC397248	97.098	448	10	1	1	448	763	1207	0	752	2.41293	1.53981	0.274427	0.894936	0.891321	0.843306	-0.414435	-0.649432	-3.64396	-1.1174	-1.12193	-1.18581
5A	60550015	TuG1812G0500000672.01	TuG1812G0500000672.01.T04	TC405392	96.2	500	8	2	1	500	769	1257	0	808	6.20467	2.30971	1.64656	0.429569	1.98071	6.09054	-0.161169	-0.432955	-0.607327	-2.32791	-0.504868	-0.164189
5A	60550015	TuG1812G0500000672.01	TuG1812G0500000672.01.T05	TC406078	99.4	500	2	1	1	500	242	740	0	905	1.03411	0	0	0	0	NA	-0.967014	NA	NA	NA	NA	NA
5A	60550015	TuG1812G0500000672.01	TuG1812G0500000672.01.T03	comp3372_c0_seq1	96.154	338	13	0	207	544	1207	870	1.39e-156	553	1.66953	2.03137	0.320956	1.50215	0.839711	1.03977	-0.598971	-0.492278	-3.11569	-0.665714	-1.19089	-0.961755
5A	60550015	TuG1812G0500000672.01	TuG1812G0500000672.01.T04	comp44398_c0_seq1	98.585	212	2	1	1	211	1177	1388	4.16e-103	374	1.03411	1.92476	0.274427	6.44354	0	1.21811	-0.967014	-0.519546	-3.64396	-0.155194	NA	-0.820945
5A	60605707	TuG1812G0500000673.01	TuG1812G0500000673.01.T01	comp4415_c0_seq1	79.412	170	28	4	48	216	768	605	2.25e-24	113	0.18614	0.0387535	0.0203279	0	0.0355817	0.0306442	-5.3723	-25.8041	-49.1935	NA	-28.1043	-32.6326
5A	61734345	TuG1812G0500000682.01	TuG1812G0500000682.01.T02	BJ217739	99.8	500	1	0	1	500	1620	1121	0	918	NA	1.15485	NA	NA	0	0	NA	-0.86591	0	NA	NA	NA
5A	61734345	TuG1812G0500000682.01	TuG1812G0500000682.01.T01	comp3925_c0_seq1	95.614	456	15	5	27	478	1568	1114	0	726	1.23258	1.39336	1.01639	0.815597	0.972351	0.971194	-0.811308	-0.717691	-0.98387	-1.2261	-1.02844	-1.02966
5A	62857602	TuG1812G0500000685.01	TuG1812G0500000685.01.T01	comp36334_c0_seq1	98.238	227	3	1	1	227	1616	1841	1.03e-109	396	1.55117	0.866141	NA	0	0	0	-0.644676	-1.15455	0	NA	NA	NA
5A	62863939	TuG1812G0500000686.01	TuG1812G0500000686.01.T01	TC380549	99	500	5	0	1	500	1030	1529	0	896	0.517056	0.288714	0.274427	2.14785	NA	NA	-1.93403	-3.46364	-3.64396	-0.465583	NA	NA
5A	62863939	TuG1812G0500000686.01	TuG1812G0500000686.01.T03	comp15191_c0_seq1	98.919	370	4	0	6	375	899	1268	0	662	1.09345	1.24369	0.594012	0.740356	0.706775	0.736279	-0.91454	-0.804059	-1.68347	-1.3507	-1.41488	-1.35818
5A	62868765	TuG1812G0500000687.01	TuG1812G0500000687.01.T01	TC269956	96.429	420	12	1	1	420	768	1184	0	689	1.03411	0.288714	NA	0	NA	0.812072	-0.967014	-3.46364	NA	NA	0	-1.23142
5A	62868765	TuG1812G0500000687.01	TuG1812G0500000687.01.T01	TC378966	99.002	501	1	2	1	500	832	1329	0	894	NA	0.577427	NA	NA	NA	0.243622	NA	-1.73182	NA	NA	0	-4.10473
5A	62868765	TuG1812G0500000687.01	TuG1812G0500000687.01.T02	TC382853	97.8	500	6	2	1	500	605	1099	0	857	0	2.30971	NA	NA	NA	0	NA	-0.432955	0	NA	0	NA
5A	62868765	TuG1812G0500000687.01	TuG1812G0500000687.01.T02	TC405530	98	500	10	0	1	500	539	1038	0	869	0	0.577427	NA	NA	NA	0.406036	NA	-1.73182	NA	NA	0	-2.46284
5A	62868765	TuG1812G0500000687.01	TuG1812G0500000687.01.T01	comp4244_c0_seq1	96.977	397	6	3	16	411	964	1355	0	662	0.636376	0.438048	1.58558	0.69805	2.51551	0.549095	-1.5714	-2.28285	-0.630686	-1.43256	-0.397534	-1.82118
5A	63027113	TuG1812G0500000689.01	TuG1812G0500000689.01.T01	TC249327	92.008	488	18	6	1	487	628	1095	0	665	0.505566	0.692913	1.05197	0.565223	0.731341	0.913581	-1.97798	-1.44318	-0.950599	-1.76921	-1.36735	-1.09459
5A	63027113	TuG1812G0500000689.01	TuG1812G0500000689.01.T01	TC399636	97.8	500	9	2	1	499	558	1056	0	861	NA	0	0.274427	NA	0	0	NA	NA	-3.64396	0	NA	NA
5A	63027113	TuG1812G0500000689.01	TuG1812G0500000689.01.T01	comp7200_c0_seq1	98.438	320	4	1	16	334	1095	776	1.37e-159	562	0.716827	0.611394	0.999697	0.891559	1.15129	0.755227	-1.39504	-1.63561	-1.0003	-1.12163	-0.868591	-1.32411
5A	64229529	TuG1812G0500000692.01	TuG1812G0500000692.01.T02	AV836231	98.2	500	9	0	1	500	907	1406	0	874	NA	NA	NA	0	0	1.21811	0	NA	0	NA	NA	-0.820945
5A	64229529	TuG1812G0500000692.01	TuG1812G0500000692.01.T01	TC239556	97.006	501	13	2	1	500	3283	3782	0	841	1.39909	1.66812	1.37213	0.644354	0.806434	0.925762	-0.714749	-0.599476	-0.728792	-1.55194	-1.24003	-1.08019
5A	64229529	TuG1812G0500000692.01	TuG1812G0500000692.01.T02	TC257696	98	500	10	0	1	500	1447	1946	0	869	4.13645	0	1.23492	0	2.07975	0	-0.241753	NA	-0.809769	NA	-0.480827	NA
5A	64229529	TuG1812G0500000692.01	TuG1812G0500000692.01.T01	TC376890	98.802	501	5	1	1	500	3282	3782	0	891	2.65914	1.53981	0.960493	0.805442	0.688038	0.961664	-0.376061	-0.649432	-1.04113	-1.24155	-1.45341	-1.03986
5A	64229529	TuG1812G0500000692.01	TuG1812G0500000692.01.T02	TC387700	99.8	499	0	1	1	498	1009	1507	0	915	1.37882	1.53981	2.19541	0	7.13057	1.04409	-0.72526	-0.649432	-0.455495	NA	-0.140241	-0.957769
5A	64229529	TuG1812G0500000692.01	TuG1812G0500000692.01.T02	TC408490	94.024	502	21	9	1	497	2011	2508	0	754	NA	NA	NA	2.14785	NA	NA	NA	NA	0	-0.465583	NA	NA
5A	64229529	TuG1812G0500000692.01	TuG1812G0500000692.01.T02	TC417437	98.6	500	6	1	1	500	1291	1789	0	883	NA	0	NA	2.14785	0	NA	NA	NA	0	-0.465583	NA	0
5A	64229529	TuG1812G0500000692.01	TuG1812G0500000692.01.T02	comp42195_c0_seq1	100	143	0	0	7	149	1398	1540	1.75e-70	265	1.34434	0.673665	NA	0.715949	0.594214	1.01509	-0.743857	-1.48442	0	-1.39675	-1.68289	-0.985134
5A	64229529	TuG1812G0500000692.01	TuG1812G0500000692.01.T01	comp8473_c0_seq1	99.634	273	0	1	21	293	3523	3794	3.73e-140	497	0	NA	NA	0	NA	3.65432	NA	0	0	NA	0	-0.273648
5A	64229529	TuG1812G0500000692.01	TuG1812G0500000692.01.T01	comp8473_c0_seq2	99.618	262	0	1	21	282	3523	3783	4.46e-134	477	0	2.30971	NA	2.14785	0	0.304527	NA	-0.432955	0	-0.465583	NA	-3.28378
5A	64987730	TuG1812G0500000694.01	TuG1812G0500000694.01.T01	TC412582	99.8	500	1	0	1	500	363	862	0	918	1.03411	1.15485	NA	NA	0	0	-0.967014	-0.86591	NA	NA	NA	NA
5A	64997357	TuG1812G0500000695.01	TuG1812G0500000695.01.T01	TC274914	97.988	497	10	0	1	497	674	1170	0	863	0	NA	NA	0.715949	2.37686	0	NA	0	0	-1.39675	-0.420724	NA
5A	64997357	TuG1812G0500000695.01	TuG1812G0500000695.01.T01	TC368836	97.849	465	9	1	1	465	1018	1481	0	802	0	1.15485	0	2.14785	0	NA	NA	-0.86591	NA	-0.465583	NA	NA
5A	64997357	TuG1812G0500000695.01	TuG1812G0500000695.01.T01	comp12065_c0_seq1	100	216	0	0	1	216	1353	1568	8.59e-111	399	1.34884	1.44617	0.902138	0.604622	0.628953	0.798538	-0.741377	-0.691482	-1.10848	-1.65393	-1.58994	-1.25229
5A	64997357	TuG1812G0500000695.01	TuG1812G0500000695.01.T01	comp32407_c0_seq1	100	99	0	0	16	114	1257	1355	3.99e-46	183	0.258528	3.46456	0.960493	1.75733	0.396143	0.609054	-3.86806	-0.288637	-1.04113	-0.569046	-2.52434	-1.64189
5A	65006897	TuG1812G0500000696.01	TuG1812G0500000696.01.T01	TC383542	99.2	500	2	1	1	500	1047	1544	0	900	1.03411	NA	0.41164	0.859138	1.18843	1.21811	-0.967014	0	-2.42931	-1.16396	-0.841447	-0.820945
5A	65006897	TuG1812G0500000696.01	TuG1812G0500000696.01.T01	TC414852	92.877	365	10	7	1	364	1145	1494	1.66e-145	516	NA	NA	0.274427	0	0	0	NA	0	-3.64396	NA	NA	NA
5A	65006897	TuG1812G0500000696.01	TuG1812G0500000696.01.T01	comp28314_c0_seq1	92.523	214	12	4	1	212	971	1182	5.59e-82	303	0.775583	0.769903	0.82328	2.86379	0.198071	1.82716	-1.28935	-1.29886	-1.21465	-0.349187	-5.04868	-0.547297
5A	65012961	TuG1812G0500000697.01	TuG1812G0500000697.01.T01	CV758832	93.625	502	26	5	1	500	1840	2337	0	745	NA	NA	NA	NA	NA	2.43622	NA	0	NA	NA	0	-0.410473
5A	65012961	TuG1812G0500000697.01	TuG1812G0500000697.01.T01	TC402902	96.413	446	13	2	1	446	1935	2377	0	732	0.933222	0.993712	1.08246	1.68345	1.56525	0.687873	-1.07156	-1.00633	-0.923821	-0.594019	-0.638877	-1.45376
5A	65012961	TuG1812G0500000697.01	TuG1812G0500000697.01.T01	TC407467	95.188	478	15	3	1	472	1902	2377	0	749	4.13645	1.38583	3.01869	1.50349	2.97107	0.498317	-0.241753	-0.721592	-0.331269	-0.665118	-0.336579	-2.00675
5A	65012961	TuG1812G0500000697.01	TuG1812G0500000697.01.T01	comp10502_c0_seq1	99.444	180	1	0	40	219	2377	2198	3.42e-89	327	0.91921	0.862291	1.39708	0.658998	1.39384	1.12642	-1.08789	-1.1597	-0.715778	-1.51745	-0.717445	-0.887766
5A	65012961	TuG1812G0500000697.01	TuG1812G0500000697.01.T01	comp25107_c0_seq1	96.178	157	6	0	1	157	1914	2070	3.11e-68	257	1.03411	1.15485	0.274427	0	0.594214	0.812072	-0.967014	-0.86591	-3.64396	NA	-1.68289	-1.23142
5A	65148783	TuG1812G0500000698.01	TuG1812G0500000698.01.T01	TC238927	93.762	513	19	4	1	500	426	938	0	758	NA	1.15485	NA	NA	0.297107	0.609054	0	-0.86591	0	NA	-3.36579	-1.64189
5A	65148783	TuG1812G0500000698.01	TuG1812G0500000698.01.T01	TC421422	99.6	500	1	1	1	499	523	1022	0	911	4.13645	2.41013	1.55508	1.00537	0.792286	0.877038	-0.241753	-0.414915	-0.643052	-0.994654	-1.26217	-1.1402
5A	65148783	TuG1812G0500000698.01	TuG1812G0500000698.01.T01	comp11460_c0_seq1	98.321	417	6	1	25	440	1141	725	0	730	2.2238	2.62271	1.01699	0.673206	0.584392	0.945327	-0.449681	-0.381285	-0.983291	-1.48543	-1.71118	-1.05783
5A	65249436	TuG1812G0500000700.01	TuG1812G0500000700.01.T01	TC391149	99.6	500	2	0	1	500	999	1498	0	913	0	1.15485	NA	2.14785	1.18843	NA	NA	-0.86591	0	-0.465583	-0.841447	NA
5A	65249436	TuG1812G0500000700.01	TuG1812G0500000700.01.T01	comp18591_c0_seq1	89.31	290	12	5	1	283	1281	1558	1.25e-94	346	1.72352	1.81477	0.594591	0.390517	0.679102	0.609054	-0.580208	-0.551034	-1.68183	-2.5607	-1.47253	-1.64189
5A	65452384	TuG1812G0500000702.01	TuG1812G0500000702.01.T01	TC405785	87.374	396	48	1	3	396	736	1131	1.32e-126	453	NA	1.15485	NA	0	0.396143	2.43622	NA	-0.86591	0	NA	-2.52434	-0.410473
5A	66047185	TuG1812G0500000706.01	TuG1812G0500000706.01.T01	CA639047	99.691	324	1	0	1	324	324	1	4.7e-169	593	3.10233	0.384951	1.37213	0.715949	0.713057	0.522046	-0.322338	-2.59773	-0.728792	-1.39675	-1.40241	-1.91554
5A	66047185	TuG1812G0500000706.01	TuG1812G0500000706.01.T01	TC275608	90.33	455	34	4	1	449	496	46	3.14e-167	588	NA	6.92913	1.64656	NA	NA	NA	NA	-0.144318	-0.607327	NA	NA	0
5A	66047185	TuG1812G0500000706.01	TuG1812G0500000706.01.T01	comp28994_c0_seq1	98.354	243	1	3	1	240	243	1	4.73e-118	424	0.64632	1.82852	3.61328	1.0174	1.72862	0.989713	-1.54722	-0.54689	-0.276757	-0.982897	-0.578495	-1.01039
5A	66674374	TuG1812G0500000710.01	TuG1812G0500000710.01.T01	TC252628	94.231	468	22	2	1	468	1154	1616	0	710	1.03411	0.577427	0	1.28871	0.475371	0.609054	-0.967014	-1.73182	NA	-0.775971	-2.10362	-1.64189
5A	66681833	TuG1812G0500000711.01	TuG1812G0500000711.01.T01	CV781409	92.986	499	21	7	1	492	2978	3469	0	717	1.29264	2.88714	0.548853	1.07392	1.78264	2.43622	-0.773611	-0.346364	-1.82198	-0.931165	-0.560965	-0.410473
5A	67173405	TuG1812G0500000715.01	TuG1812G0500000715.01.T01	TC413415	100	500	0	0	1	500	943	1442	0	924	1.18184	2.39854	1.26236	1.50349	1.03342	0.664423	-0.846137	-0.41692	-0.792166	-0.665118	-0.967665	-1.50507
5A	67843301	TuG1812G0500000718.01	TuG1812G0500000718.01.T01	comp21260_c0_seq1	88.053	226	22	5	1	224	437	659	1.06e-69	263	0	0.144357	0	0	0.060945	0	NA	-6.92728	NA	NA	-16.4082	NA
5A	68202022	TuG1812G0500000721.01	TuG1812G0500000721.01.T01	TC267496	94.311	457	15	7	1	454	1342	1790	0	689	3.10233	1.53981	NA	2.14785	1.78264	3.65432	-0.322338	-0.649432	0	-0.465583	-0.560965	-0.273648
5A	68202022	TuG1812G0500000721.01	TuG1812G0500000721.01.T01	TC389884	99.793	484	1	0	1	484	1311	1794	0	889	3.10233	0.769903	1.18918	2.41633	0.792286	1.4888	-0.322338	-1.29886	-0.840914	-0.413851	-1.26217	-0.671682
5A	68202022	TuG1812G0500000721.01	TuG1812G0500000721.01.T01	comp4763_c0_seq1	97.569	288	5	1	247	534	1794	1509	2.99e-138	492	1.61861	1.20629	1.75934	0.925552	1.08491	0.987088	-0.617814	-0.828991	-0.568396	-1.08044	-0.921738	-1.01308
5A	68256084	TuG1812G0500000722.01	TuG1812G0500000722.01.T01	TC370372	99.202	501	3	1	1	500	1363	1863	0	902	1.4151	1.08415	2.2564	0.650006	0.776117	0.898604	-0.706664	-0.922382	-0.443185	-1.53845	-1.28847	-1.11284
5A	68256084	TuG1812G0500000722.01	TuG1812G0500000722.01.T01	comp10668_c0_seq1	98.113	212	4	0	1	212	1700	1911	9.92e-102	370	1.81457	1.15485	1.42525	0.740637	0.818262	0.744399	-0.551094	-0.86591	-0.701632	-1.35019	-1.2221	-1.34336
5A	68262548	TuG1812G0500000723.01	TuG1812G0500000723.01.T02	CD889357	96.509	487	6	2	11	497	934	1409	0	795	NA	NA	0.548853	0	NA	0	0	0	-1.82198	NA	NA	NA
5A	68262548	TuG1812G0500000723.01	TuG1812G0500000723.01.T02	TC251229	86.364	440	42	6	1	423	1393	1831	6.09e-130	464	4.13645	2.77165	2.60705	0.357974	0.648234	9.74487	-0.241753	-0.360796	-0.383575	-2.7935	-1.54265	-0.102618
5A	68262548	TuG1812G0500000723.01	TuG1812G0500000723.01.T02	TC374859	96.6	500	17	0	1	500	1227	1726	0	830	NA	3.46456	NA	NA	NA	NA	NA	-0.288637	0	NA	NA	NA
5A	68262548	TuG1812G0500000723.01	TuG1812G0500000723.01.T02	TC427364	89.045	356	34	3	1	356	1501	1851	1.33e-121	436	2.06822	NA	NA	0	0	NA	-0.483507	0	0	NA	NA	NA
5A	68262548	TuG1812G0500000723.01	TuG1812G0500000723.01.T02	comp7580_c0_seq1	91.028	457	39	1	133	589	1851	1397	1.88e-175	616	2.13206	1.49703	1.45217	0.693773	0.939829	2.24532	-0.469031	-0.667988	-0.688623	-1.44139	-1.06402	-0.445371
5A	68270272	TuG1812G0500000724.01	TuG1812G0500000724.01.T01	TC457537	98.738	317	4	0	1	317	561	877	5.84e-160	564	0	NA	NA	2.14785	NA	NA	NA	NA	NA	-0.465583	0	0
5A	69704354	TuG1812G0500000732.01	TuG1812G0500000732.01.T01	TC238843	92.629	502	27	7	1	494	754	1253	0	713	0.258528	0.288714	0.274427	4.29569	0	2.43622	-3.86806	-3.46364	-3.64396	-0.232791	NA	-0.410473
5A	69704354	TuG1812G0500000732.01	TuG1812G0500000732.01.T01	TC375693	100	500	0	0	1	500	656	1155	0	924	0.749731	1.39107	1.09771	0.836823	0.567204	1.72082	-1.33381	-0.718869	-0.91099	-1.195	-1.76303	-0.581119
5A	69704354	TuG1812G0500000732.01	TuG1812G0500000732.01.T01	comp5364_c0_seq1	98.596	356	2	1	1	353	836	1191	6.12e-179	627	1.42241	1.37626	0.881223	1.01374	0.688038	1.11938	-0.703034	-0.726607	-1.13479	-0.986448	-1.45341	-0.893354
5A	69825731	TuG1812G0500000734.01	TuG1812G0500000734.01.T01	comp22075_c0_seq1	92.612	379	24	3	1	376	2191	1814	2.02e-153	542	4.23046	2.10591	0.403569	0.457738	0.351127	1.58884	-0.236381	-0.474854	-2.47789	-2.18466	-2.84798	-0.629391
5A	69825731	TuG1812G0500000734.01	TuG1812G0500000734.01.T01	comp2544_c0_seq2	97.302	556	12	2	7	562	1233	681	0	941	1.14901	1.73228	0.862484	1.02278	0.565918	1.14645	-0.870313	-0.577273	-1.15944	-0.977724	-1.76704	-0.872254
5A	69825731	TuG1812G0500000734.01	TuG1812G0500000734.01.T01	comp2544_c0_seq4	98.724	392	4	1	1	391	1692	1301	0	695	2.97307	1.01899	0.548853	17.1828	1.3865	2.03018	-0.336353	-0.981365	-1.82198	-0.0581978	-0.721241	-0.492567
5A	69830105	TuG1812G0500000735.01	TuG1812G0500000735.01.T01	CA620327	93.145	496	15	19	10	488	2777	3270	0	713	2.68869	2.69466	0.182951	2.14785	0.297107	1.82716	-0.371928	-0.371104	-5.46594	-0.465583	-3.36579	-0.547297
5A	69830105	TuG1812G0500000735.01	TuG1812G0500000735.01.T01	TC267752	88.548	489	48	4	4	488	2763	3247	1.21e-166	586	0.620467	0.721784	0.343033	0	0.198071	0.609054	-1.61169	-1.38546	-2.91517	NA	-5.04868	-1.64189
5A	69830105	TuG1812G0500000735.01	TuG1812G0500000735.01.T01	comp2544_c0_seq1	98.101	632	12	0	1	632	2858	3489	0	1101	1.11783	1.25018	0.611324	1.08568	0.767087	0.903263	-0.894588	-0.799882	-1.63579	-0.921084	-1.30363	-1.1071
5A	69830105	TuG1812G0500000735.01	TuG1812G0500000735.01.T01	comp2544_c0_seq3	97.658	555	13	0	1	555	2935	3489	0	953	0.846091	2.54068	0.53271	0.942957	0.891321	1.08642	-1.18191	-0.393595	-1.87719	-1.06049	-1.12193	-0.920454
5A	69973198	TuG1812G0500000738.01	TuG1812G0500000738.01.T01	TC428477	95.304	362	15	1	1	360	1535	1896	9.7e-163	573	1.03411	1.15485	NA	NA	NA	0	-0.967014	-0.86591	NA	NA	0	NA
5A	69973198	TuG1812G0500000738.01	TuG1812G0500000738.01.T01	comp24063_c0_seq1	99.598	249	1	0	1	249	1648	1896	1.83e-127	455	0.517056	0.17767	0.754673	0.536962	0.36567	0.406036	-1.93403	-5.62841	-1.32508	-1.86233	-2.7347	-2.46284
5A	69979926	TuG1812G0500000739.01	TuG1812G0500000739.01.T01	TC246799	93.2	500	32	2	1	500	288	785	0	734	5.17056	9.23884	1.26922	2.80872	2.52541	2.17519	-0.193403	-0.108239	-0.787884	-0.356034	-0.395975	-0.459729
5A	69979926	TuG1812G0500000739.01	TuG1812G0500000739.01.T01	comp8112_c0_seq1	98.567	349	5	0	1	349	459	807	3.05e-176	617	1.28917	1.06621	1.67997	0.756146	1.00863	0.803592	-0.775691	-0.937902	-0.595249	-1.3225	-0.991445	-1.24441
5A	70059637	TuG1812G0500000740.01	TuG1812G0500000740.01.T01	comp362_c0_seq1	93.862	391	14	6	18	400	28	416	4.58e-165	580	0.967215	0.819383	1.27579	0.941262	0.769436	1.18852	-1.0339	-1.22043	-0.783827	-1.0624	-1.29965	-0.841384
5A	70695376	TuG1812G0500000743.01	TuG1812G0500000743.01.T01	TC424039	99.594	493	2	0	1	493	1378	1870	0	900	NA	NA	NA	NA	1.18843	8.52676	0	0	0	0	-0.841447	-0.117278
5A	70718471	TuG1812G0500000745.01	TuG1812G0500000745.01.T02	comp9794_c0_seq1	99.023	512	3	2	1	512	3186	3695	0	917	1.07493	0.937136	0.839112	0.69595	0.504675	0.77516	-0.930292	-1.06708	-1.19174	-1.43688	-1.98147	-1.29006
5A	70874635	TuG1812G0500000747.01	TuG1812G0500000747.01.T01	TC245246	87.611	339	24	7	1	339	9222	9542	8.16e-104	377	1.55117	0.494938	0.548853	0	0.169775	0.812072	-0.644676	-2.02046	-1.82198	NA	-5.89013	-1.23142
5A	70874635	TuG1812G0500000747.01	TuG1812G0500000747.01.T01	TC278884	98.4	500	8	0	1	500	8374	8873	0	880	NA	NA	0.82328	0.536962	NA	NA	NA	NA	-1.21465	-1.86233	0	0
5A	70874635	TuG1812G0500000747.01	TuG1812G0500000747.01.T01	TC406187	96.393	499	15	3	1	499	7887	8382	0	821	NA	NA	0.548853	NA	NA	NA	0	NA	-1.82198	0	0	NA
5A	70874635	TuG1812G0500000747.01	TuG1812G0500000747.01.T01	comp39796_c0_seq1	98.649	74	1	0	1	74	158	231	3.31e-30	132	0.517056	0.384951	0.548853	NA	0	0	-1.93403	-2.59773	-1.82198	NA	NA	NA
5A	70874635	TuG1812G0500000747.01	TuG1812G0500000747.01.T01	comp9757_c0_seq1	99.094	331	3	0	42	372	9649	9319	1.51e-169	595	0.508848	0.343533	0.516294	0.406349	0.463536	0.429601	-1.96522	-2.91093	-1.93688	-2.46094	-2.15733	-2.32774
5A	70978907	TuG1812G0500000748.01	TuG1812G0500000748.01.T02	TC380070	100	500	0	0	1	500	1144	1643	0	924	0	0	NA	0	2.37686	0.609054	NA	NA	0	NA	-0.420724	-1.64189
5A	70978907	TuG1812G0500000748.01	TuG1812G0500000748.01.T01	TC383844	99.4	500	2	1	1	500	1115	1613	0	905	NA	0.384951	NA	1.07392	NA	0	0	-2.59773	NA	-0.931165	0	NA
5A	70978907	TuG1812G0500000748.01	TuG1812G0500000748.01.T02	TC459791	85.223	494	73	0	1	494	423	916	2.77e-143	508	0	0.230971	NA	0	0	NA	NA	-4.32955	0	NA	NA	NA
5A	71173859	TuG1812G0500000751.01	TuG1812G0500000751.01.T01	comp8273_c0_seq1	99.196	373	3	0	1	373	754	1126	0	673	0.827289	0.816097	0.931774	1.02319	0.871259	1.14428	-1.20877	-1.22534	-1.07322	-0.977339	-1.14776	-0.873909
5A	71225720	TuG1812G0500000752.01	TuG1812G0500000752.01.T01	BQ743810	92.969	512	24	7	1	500	1185	1696	0	736	NA	NA	NA	2.14785	0	3.65432	0	0	0	-0.465583	NA	-0.273648
5A	71225720	TuG1812G0500000752.01	TuG1812G0500000752.01.T01	comp30913_c0_seq1	96.694	242	7	1	1	242	1550	1790	2.22e-111	401	1.44776	3.46456	0.640329	1.71828	0.648234	1.91417	-0.690724	-0.288637	-1.5617	-0.581978	-1.54265	-0.52242
5A	71379301	TuG1812G0500000753.01	TuG1812G0500000753.01.T01	comp26120_c0_seq1	100	33	0	0	1	33	1610	1642	4.09e-09	62.1	1.62503	18.4777	1.23492	7.51746	0.445661	2.19259	-0.615372	-0.0541194	-0.809769	-0.133024	-2.24386	-0.456081
5A	71608555	TuG1812G0500000754.01	TuG1812G0500000754.01.T02	comp8341_c0_seq1	99.545	220	1	0	1	220	220	1	8.07e-111	401	0.704076	0.846131	1.20062	1.38521	0.818009	1.25641	-1.4203	-1.18185	-0.832906	-0.721915	-1.22248	-0.795916
5A	71848337	TuG1812G0500000755.01	TuG1812G0500000755.01.T01	TC405566	98.8	500	6	0	1	500	2661	3160	0	891	2.06822	1.6168	NA	1.61088	0.990357	0.609054	-0.483507	-0.618507	0	-0.620777	-1.00974	-1.64189
5A	71848337	TuG1812G0500000755.01	TuG1812G0500000755.01.T01	comp7828_c0_seq1	96.439	337	7	3	9	341	3185	2850	3.02e-156	551	1.21578	1.52307	0.76678	0.672227	0.658055	0.856691	-0.822518	-0.656569	-1.30415	-1.48759	-1.51963	-1.16728
5A	72428535	TuG1812G0500000760.01	TuG1812G0500000760.01.T01	TC376571	99.601	501	1	1	1	500	1829	2329	0	913	1.10668	1.28811	0.593116	0.679233	0.599666	0.952085	-0.903603	-0.776333	-1.68601	-1.47225	-1.6676	-1.05033
5A	72497544	TuG1812G0500000761.01	TuG1812G0500000761.01.T01	TC432979	93.857	293	18	0	1	293	1123	1415	2.85e-123	442	NA	NA	NA	0.715949	0	0	0	0	0	-1.39675	NA	NA
5A	72554401	TuG1812G0500000762.01	TuG1812G0500000762.01.T01	comp31389_c0_seq1	96.386	166	6	0	1	166	834	999	5.94e-73	274	0.689408	0.164979	0.274427	0	0.148554	0.152264	-1.45052	-6.06137	-3.64396	NA	-6.73158	-6.56756
5A	72610929	TuG1812G0500000767.01	TuG1812G0500000767.01.T01	TC423739	92	500	22	5	1	500	2472	2953	0	686	NA	1.15485	NA	0	0	0.913581	NA	-0.86591	0	NA	NA	-1.09459
5A	72610929	TuG1812G0500000767.01	TuG1812G0500000767.01.T01	comp18198_c0_seq1	98.928	653	6	1	2	654	2423	3074	0	1166	1.83842	1.19094	0.948019	1.07392	0.921032	1.1311	-0.543945	-0.83967	-1.05483	-0.931165	-1.08574	-0.884095
5A	75065314	TuG1812G0500000774.01	TuG1812G0500000774.01.T01	TC255509	92.34	483	32	3	1	483	912	1389	0	682	5.17056	2.30971	1.37213	0.536962	0.594214	0.487243	-0.193403	-0.432955	-0.728792	-1.86233	-1.68289	-2.05236
5A	75065314	TuG1812G0500000774.01	TuG1812G0500000774.01.T01	TC371347	99.8	500	1	0	1	500	876	1375	0	918	NA	0.288714	NA	0	1.18843	NA	0	-3.46364	0	NA	-0.841447	0
5A	75065314	TuG1812G0500000774.01	TuG1812G0500000774.01.T01	TC412566	99.404	503	0	1	1	500	52	554	0	909	NA	NA	NA	NA	0.594214	NA	NA	NA	NA	NA	-1.68289	0
5A	75065314	TuG1812G0500000774.01	TuG1812G0500000774.01.T01	comp10107_c0_seq1	96.764	309	10	0	1	309	1084	1392	1.1e-145	516	1.37882	1.45612	1.59574	0.633537	1.08939	0.842048	-0.72526	-0.686756	-0.626669	-1.57844	-0.917943	-1.18758
5A	75341163	TuG1812G0500000775.01	TuG1812G0500000775.01.T01	comp28908_c0_seq1	96.04	202	8	0	1	202	2306	2507	9.77e-90	329	3.10233	2.69466	0.274427	3.57974	0.679102	2.43622	-0.322338	-0.371104	-3.64396	-0.27935	-1.47253	-0.410473
5A	75602350	TuG1812G0500000776.01	TuG1812G0500000776.01.T01	TC259773	96.188	446	15	2	1	446	3129	3572	0	728	NA	0	NA	2.14785	NA	1.21811	NA	NA	NA	-0.465583	NA	-0.820945
5A	75602350	TuG1812G0500000776.01	TuG1812G0500000776.01.T01	comp25996_c0_seq1	99.422	346	2	0	1	346	3221	3566	1.45e-179	628	1.03411	0.659917	0.713509	1.78987	0.990357	0.655904	-0.967014	-1.51534	-1.40152	-0.558699	-1.00974	-1.52461
5A	75859489	TuG1812G0500000786.01	TuG1812G0500000786.01.T01	TC392695	96.145	441	13	2	1	440	8926	9363	0	717	2.06822	0.769903	NA	4.29569	1.78264	1.21811	-0.483507	-1.29886	0	-0.232791	-0.560965	-0.820945
5A	77127806	TuG1812G0500000793.01	TuG1812G0500000793.01.T02	TC444494	99.8	500	1	0	1	500	1393	1892	0	918	7.23878	0.808398	0.235223	0.306835	1.54496	1.77179	-0.138145	-1.23701	-4.25129	-3.25908	-0.647267	-0.5644
5A	77127806	TuG1812G0500000793.01	TuG1812G0500000793.01.T02	comp24481_c0_seq1	98.315	178	0	1	1	175	1455	1632	9.61e-84	309	0.517056	0.494938	2.74427	1.53418	2.37686	2.63923	-1.93403	-2.02046	-0.364396	-0.651816	-0.420724	-0.378898
5A	77573175	TuG1812G0500000798.01	TuG1812G0500000798.01.T01	comp23102_c0_seq1	94.652	187	10	0	3	189	767	953	6.49e-78	291	1.55117	1.15485	0.891886	0.715949	0.594214	2.03018	-0.644676	-0.86591	-1.12122	-1.39675	-1.68289	-0.492567
5A	77573175	TuG1812G0500000798.01	TuG1812G0500000798.01.T01	comp28122_c0_seq1	99.398	166	1	0	1	166	1574	1739	1.51e-81	302	0.344704	1.15485	NA	NA	2.37686	NA	-2.90104	-0.86591	0	0	-0.420724	0
5A	77672596	TuG1812G0500000799.01	TuG1812G0500000799.01.T02	BY857664	97.717	438	10	0	1	438	728	1165	0	754	2.06822	1.92476	NA	0.859138	1.18843	0	-0.483507	-0.519546	0	-1.16396	-0.841447	NA
5A	77672596	TuG1812G0500000799.01	TuG1812G0500000799.01.T02	TC251060	88.713	505	29	12	3	500	3300	3783	2.68e-168	592	1.96481	2.47469	0.392038	0.991314	0.792286	0.996634	-0.508955	-0.404091	-2.55077	-1.00876	-1.26217	-1.00338
5A	77672596	TuG1812G0500000799.01	TuG1812G0500000799.01.T02	TC374241	99	500	5	0	1	500	3177	3676	0	896	7.23878	0.824896	1.09771	0	0	NA	-0.138145	-1.21227	-0.91099	NA	NA	0
5A	77672596	TuG1812G0500000799.01	TuG1812G0500000799.01.T02	TC404079	98.684	304	3	1	1	304	1706	2008	3.54e-152	538	1.03411	NA	NA	0	0	0.812072	-0.967014	0	0	NA	NA	-1.23142
5A	77672596	TuG1812G0500000799.01	TuG1812G0500000799.01.T01	comp3310_c0_seq1	98.374	492	8	0	1	492	3675	4166	0	865	2.00096	1.46951	0.46807	0.757235	0.622874	0.926182	-0.499759	-0.680499	-2.13643	-1.32059	-1.60546	-1.0797
5A	78544652	TuG1812G0500000803.01	TuG1812G0500000803.01.T01	TC279279	94.49	490	21	5	1	490	616	1099	0	750	NA	NA	NA	0	2.37686	3.65432	NA	0	0	NA	-0.420724	-0.273648
5A	78544652	TuG1812G0500000803.01	TuG1812G0500000803.01.T01	TC422853	99.194	496	2	2	1	496	843	1336	0	893	0.258528	1.15485	NA	0	1.48554	0.609054	-3.86806	-0.86591	0	NA	-0.673158	-1.64189
5A	78544652	TuG1812G0500000803.01	TuG1812G0500000803.01.T01	TC424482	93.902	492	5	24	1	467	732	1223	0	723	NA	1.15485	NA	0	NA	1.21811	0	-0.86591	0	NA	0	-0.820945
5A	78544652	TuG1812G0500000803.01	TuG1812G0500000803.01.T01	TC438798	96.855	159	4	1	1	158	1123	1281	6.63e-70	265	NA	0	0	NA	2.37686	1.21811	NA	NA	NA	0	-0.420724	-0.820945
5A	78544652	TuG1812G0500000803.01	TuG1812G0500000803.01.T01	comp9264_c0_seq1	94.955	337	4	3	1	329	1008	1339	1.27e-145	516	1.84342	1.35397	0.836348	1.10748	0.8319	1.04409	-0.542471	-0.73857	-1.19567	-0.902948	-1.20207	-0.957769
5A	78778446	TuG1812G0500000804.01	TuG1812G0500000804.01.T01	TC377952	97.379	496	11	2	1	495	1158	1652	0	843	NA	NA	0.548853	0.715949	NA	NA	NA	NA	-1.82198	-1.39675	NA	NA
5A	78778446	TuG1812G0500000804.01	TuG1812G0500000804.01.T01	comp16155_c0_seq1	98.603	358	3	2	1	357	1377	1733	1.11e-180	632	1.65458	1.74978	1.01195	0.458529	0.78646	1.13952	-0.604384	-0.571501	-0.988193	-2.18089	-1.27152	-0.877562
5A	78791048	TuG1812G0500000806.01	TuG1812G0500000806.01.T02	TC255177	93.625	502	28	2	1	498	1893	2394	0	747	NA	NA	NA	0.715949	NA	0	NA	NA	0	-1.39675	NA	NA
5A	78791048	TuG1812G0500000806.01	TuG1812G0500000806.01.T02	comp5807_c0_seq1	89.849	463	29	12	1	447	2058	2518	1.94e-164	579	1.09678	1.04762	1.27334	0.739044	1.08509	0.975871	-0.911756	-0.954546	-0.785337	-1.3531	-0.921585	-1.02473
5A	79504756	TuG1812G0500000808.01	TuG1812G0500000808.01.T03	comp16917_c0_seq1	88.66	194	21	1	97	290	1686	1494	2.9e-61	235	0.790791	2.20472	2.56131	0.966531	2.02732	1.15044	-1.26456	-0.453572	-0.390424	-1.03463	-0.493262	-0.869236
5A	80589562	TuG1812G0500000814.01	TuG1812G0500000814.01.T01	CA649491	89.956	458	27	19	1	450	608	162	9.06e-168	590	1.24093	1.38583	1.37213	1.4319	2.37686	1.52264	-0.805845	-0.721592	-0.728792	-0.698374	-0.420724	-0.656756
5A	80589562	TuG1812G0500000814.01	TuG1812G0500000814.01.T01	TC273678	93.788	499	26	2	1	499	511	18	0	745	0.970798	0.975933	1.7757	0.859138	1.18843	0.794418	-1.03008	-1.02466	-0.563158	-1.16396	-0.841447	-1.25878
5A	80589562	TuG1812G0500000814.01	TuG1812G0500000814.01.T01	TC410679	99.4	500	3	0	1	500	540	41	0	907	0.797743	0.621845	1.92099	1.93306	3.10312	1.01509	-1.25354	-1.60812	-0.520566	-0.517314	-0.322256	-0.985134
5A	80589562	TuG1812G0500000814.01	TuG1812G0500000814.01.T01	comp4756_c0_seq1	99.784	463	1	0	13	475	463	1	0	850	0.769022	0.80296	1.46135	1.14104	1.25776	0.950645	-1.30035	-1.24539	-0.684299	-0.876391	-0.795062	-1.05192
5A	80584037	TuG1812G0500000813.01	TuG1812G0500000813.01.T01	TC258976	91.721	459	30	3	1	451	1218	1676	5.67e-180	630	0.689408	0	0.548853	0	1.18843	0.812072	-1.45052	NA	-1.82198	NA	-0.841447	-1.23142
5A	80584037	TuG1812G0500000813.01	TuG1812G0500000813.01.T01	TC425724	98	500	6	4	1	500	1419	1914	0	865	1.55117	0.641586	2.19541	1.4319	0.891321	0.749605	-0.644676	-1.55864	-0.455495	-0.698374	-1.12193	-1.33404
5A	80584037	TuG1812G0500000813.01	TuG1812G0500000813.01.T01	comp16311_c0_seq1	98.201	389	7	0	17	405	1796	1408	0	680	0.572454	0.986263	1.26922	0.985102	0.990357	1.16515	-1.74686	-1.01393	-0.787884	-1.01512	-1.00974	-0.858261
5A	80594749	TuG1812G0500000815.01	TuG1812G0500000815.01.T01	TC391249	99.4	500	2	1	1	500	1167	1665	0	905	0	0.577427	0.82328	1.07392	0.475371	0.974487	NA	-1.73182	-1.21465	-0.931165	-2.10362	-1.02618
5A	80964948	TuG1812G0500000817.01	TuG1812G0500000817.01.T01	TC390977	96.627	504	12	2	1	500	878	1380	0	832	0	0	0.274427	0	1.18843	0.406036	NA	NA	-3.64396	NA	-0.841447	-2.46284
5A	80964948	TuG1812G0500000817.01	TuG1812G0500000817.01.T01	comp1866_c0_seq1	97.878	377	8	0	52	428	1444	1068	0	652	0.509934	0.335362	0.194517	0.201361	0.169412	0.316091	-1.96104	-2.98186	-5.14094	-4.96622	-5.90279	-3.16364
5A	81196695	TuG1812G0500000819.01	TuG1812G0500000819.01.T01	TC379482	99	500	5	0	1	500	2145	2644	0	896	1.8332	1.12364	1.04282	0.685483	1.12748	1.1311	-0.545495	-0.889963	-0.958937	-1.45883	-0.886931	-0.884095
5A	81196695	TuG1812G0500000819.01	TuG1812G0500000819.01.T01	comp10609_c0_seq1	99.578	237	1	0	62	298	2504	2740	1.02e-120	433	1.43509	1.25356	1.30465	0.908704	0.988604	1.32178	-0.696819	-0.797728	-0.766488	-1.10047	-1.01153	-0.756557
5A	81803400	TuG1812G0500000822.01	TuG1812G0500000822.01.T02	comp44974_c0_seq1	97.403	154	4	0	5	158	650	803	6.73e-70	263	2.06822	0	NA	NA	NA	NA	-0.483507	NA	NA	NA	NA	NA
5A	81987253	TuG1812G0500000824.01	TuG1812G0500000824.01.T01	TC264878	93.014	501	30	5	1	498	2127	2625	0	726	1.03411	0	NA	2.14785	0.396143	0	-0.967014	NA	0	-0.465583	-2.52434	NA
5A	81987253	TuG1812G0500000824.01	TuG1812G0500000824.01.T01	TC267053	93.682	459	19	10	1	458	1585	2034	0	678	NA	0	NA	0.536962	NA	NA	0	NA	0	-1.86233	0	0
5A	81987253	TuG1812G0500000824.01	TuG1812G0500000824.01.T01	TC370111	96.806	501	11	5	1	496	2108	2608	0	832	1.31614	1.5673	NA	1.48697	1.27985	1.59291	-0.759797	-0.638039	0	-0.672508	-0.781344	-0.627782
5A	81997928	TuG1812G0500000825.01	TuG1812G0500000825.01.T01	TC260880	95.04	504	21	3	1	500	2289	2792	0	789	2.06822	NA	NA	0	0	NA	-0.483507	NA	0	NA	NA	0
5A	81997928	TuG1812G0500000825.01	TuG1812G0500000825.01.T01	TC263439	94.036	503	23	5	3	498	2396	2898	0	756	0	2.021	0.960493	0.61367	1.6638	1.62414	NA	-0.494806	-1.04113	-1.62954	-0.601034	-0.615709
5A	81997928	TuG1812G0500000825.01	TuG1812G0500000825.01.T01	TC379343	91.139	474	27	15	1	463	1475	1944	2.04e-179	628	1.03411	NA	NA	0	NA	NA	-0.967014	NA	NA	NA	NA	NA
5A	81997928	TuG1812G0500000825.01	TuG1812G0500000825.01.T01	TC404379	96.429	504	14	3	1	500	2387	2890	0	828	1.11366	1.82852	1.28066	1.20816	0.792286	1.55032	-0.897941	-0.54689	-0.780849	-0.827703	-1.26217	-0.645028
5A	81997928	TuG1812G0500000825.01	TuG1812G0500000825.01.T01	TC438288	98.557	485	7	0	2	486	2448	2932	0	857	1.4219	1.55585	0.795277	1.34445	0.714663	0.972144	-0.703283	-0.642737	-1.25742	-0.743797	-1.39926	-1.02865
5A	81997928	TuG1812G0500000825.01	TuG1812G0500000825.01.T01	comp19379_c0_seq1	99.628	269	1	0	1	269	2770	3038	1.44e-138	492	2.24057	1.81477	0.997083	0.75934	0.984167	1.10737	-0.446314	-0.551034	-1.00293	-1.31693	-1.01609	-0.90304
5A	81997928	TuG1812G0500000825.01	TuG1812G0500000825.01.T01	comp4251_c0_seq1	98.382	309	5	0	16	324	2793	2485	4.8e-154	544	1.79875	1.48341	0.846149	1.00451	0.672932	1.11914	-0.55594	-0.674124	-1.18183	-0.995514	-1.48603	-0.893546
5A	82152652	TuG1812G0500000830.01	TuG1812G0500000830.01.T01	TC402277	99.598	498	1	1	1	498	1391	1887	0	907	1.31614	1.36483	0.878165	0.471478	1.98071	1.79816	-0.759797	-0.732693	-1.13874	-2.12099	-0.504868	-0.556124
5A	82152652	TuG1812G0500000830.01	TuG1812G0500000830.01.T01	comp6614_c0_seq1	99.273	275	2	0	17	291	1952	1678	3.36e-140	497	1.39431	0.937777	1.08107	0.669001	0.822758	0.750695	-0.717202	-1.06635	-0.925006	-1.49477	-1.21542	-1.3321
5A	83323635	TuG1812G0500000834.01	TuG1812G0500000834.01.T01	TC438015	99.8	500	1	0	1	500	748	1247	0	918	1.03411	0.577427	0.274427	0.715949	1.18843	0	-0.967014	-1.73182	-3.64396	-1.39675	-0.841447	NA
5A	83327431	TuG1812G0500000835.01	TuG1812G0500000835.01.T01	comp18995_c0_seq1	98.471	327	5	0	1	327	1338	1664	5.43e-164	577	2.49127	11.3176	0.104543	0.647763	0.245882	0.931494	-0.401402	-0.0883582	-9.5654	-1.54377	-4.067	-1.07354
5A	83771209	TuG1812G0500000842.01	TuG1812G0500000842.01.T01	CA671056	88.305	419	14	9	1	391	485	74	2.81e-133	475	2.04101	5.77427	0.201246	0.555226	0.0220079	0.617175	-0.489954	-0.173182	-4.96904	-1.80107	-45.4382	-1.62029
5A	83771209	TuG1812G0500000842.01	TuG1812G0500000842.01.T01	CJ886227	87.413	429	16	7	1	407	426	14	2.83e-128	459	1.12812	12.7034	0	0.795499	0.0660238	0.448777	-0.886429	-0.0787191	NA	-1.25707	-15.1461	-2.22828
5A	83771209	TuG1812G0500000842.01	TuG1812G0500000842.01.T01	TC253215	93.891	311	15	1	1	307	2358	2668	1.69e-130	466	2.06822	2.30971	NA	0.429569	0.792286	0.730865	-0.483507	-0.432955	0	-2.32791	-1.26217	-1.36824
5A	83771209	TuG1812G0500000842.01	TuG1812G0500000842.01.T01	TC411512	94.949	495	20	2	1	494	2463	2953	0	771	NA	NA	0.137213	0.429569	0.396143	NA	NA	0	-7.28792	-2.32791	-2.52434	NA
5A	83771209	TuG1812G0500000842.01	TuG1812G0500000842.01.T01	comp2770_c0_seq1	87.56	418	14	13	1	383	2934	2520	1.29e-125	449	1.97527	2.07691	0.419578	0.583637	0.408809	0.637118	-0.50626	-0.481484	-2.38335	-1.71339	-2.44613	-1.56957
5A	83771209	TuG1812G0500000842.01	TuG1812G0500000842.01.T01	comp33053_c0_seq1	96.094	128	4	1	7	134	375	501	2.79e-53	207	2.24057	1.92476	0.274427	0.536962	0.0396143	0.870077	-0.446314	-0.519546	-3.64396	-1.86233	-25.2434	-1.14932
5A	83913399	TuG1812G0500000844.01	TuG1812G0500000844.01.T01	TC240180	97	500	15	0	1	500	996	1495	0	841	1.054	1.22703	1.25913	1.24575	0.6724	0.857823	-0.948768	-0.814974	-0.794197	-0.802729	-1.48721	-1.16574
5A	83913399	TuG1812G0500000844.01	TuG1812G0500000844.01.T01	TC378864	99.198	499	4	0	1	499	952	1450	0	900	1.03411	1.15485	0.329312	0.536962	0.148554	4.87243	-0.967014	-0.86591	-3.03663	-1.86233	-6.73158	-0.205236
5A	84345461	TuG1812G0500000845.01	TuG1812G0500000845.01.T01	comp2112_c0_seq1	97	200	6	0	1	200	1371	1570	1.23e-91	337	1.81063	1.59569	0.72667	0.817354	0.929	0.948765	-0.552295	-0.62669	-1.37614	-1.22346	-1.07643	-1.054
5A	84593108	TuG1812G0500000847.01	TuG1812G0500000847.01.T01	TC411343	98.857	350	3	1	1	349	866	1215	2.64e-178	625	NA	NA	NA	0	1.18843	NA	0	0	0	NA	-0.841447	NA
5A	84593108	TuG1812G0500000847.01	TuG1812G0500000847.01.T01	comp9531_c0_seq1	100	71	0	0	310	380	901	831	5.24e-30	132	2.29443	2.02606	0.856211	1.27626	1.26271	1.57247	-0.435837	-0.493569	-1.16794	-0.783542	-0.79195	-0.635943
5A	84703938	TuG1812G0500000850.01	TuG1812G0500000850.01.T01	TC455220	99.401	501	2	1	1	500	1344	1844	0	907	0.344704	2.30971	0.82328	0	0.237686	1.21811	-2.90104	-0.432955	-1.21465	NA	-4.20724	-0.820945
5A	85657270	TuG1812G0500000854.01	TuG1812G0500000854.01.T01	TC380088	97.279	294	8	0	1	294	3630	3923	1.67e-140	499	0.517056	0	0.274427	0.715949	NA	1.21811	-1.93403	NA	-3.64396	-1.39675	0	-0.820945
5A	85657270	TuG1812G0500000854.01	TuG1812G0500000854.01.T01	comp35085_c0_seq1	97.895	190	4	0	1	190	3734	3923	9.67e-90	329	2.41293	0.577427	0.640329	0.805442	1.3865	1.82716	-0.414435	-1.73182	-1.5617	-1.24155	-0.721241	-0.547297
5A	85696762	TuG1812G0500000855.01	TuG1812G0500000855.01.T04	TC449657	97.8	500	10	1	1	500	1584	2082	0	861	NA	NA	1.37213	0	NA	NA	0	NA	-0.728792	NA	0	0
5A	86347401	TuG1812G0500000856.01	TuG1812G0500000856.01.T01	TC412791	97.872	282	1	2	1	282	551	827	1.68e-135	483	0.517056	0.230971	NA	NA	NA	0.348031	-1.93403	-4.32955	0	NA	0	-2.87331
5A	86347401	TuG1812G0500000856.01	TuG1812G0500000856.01.T01	comp4112_c0_seq1	97.411	309	8	0	1	309	519	827	4.82e-149	527	0.533113	0.236893	14.6361	3.63482	81.5262	0.674243	-1.87577	-4.22131	-0.0683243	-0.275117	-0.012266	-1.48314
5A	86373529	TuG1812G0500000858.01	TuG1812G0500000858.01.T01	TC247377	90.419	501	39	8	1	500	1090	1582	0	669	1.37882	5.19685	NA	NA	2.37686	2.43622	-0.72526	-0.192424	0	NA	-0.420724	-0.410473
5A	86373529	TuG1812G0500000858.01	TuG1812G0500000858.01.T01	TC380431	92.961	483	25	9	1	481	1994	2469	0	699	1.46499	2.49826	0.669924	0.807152	0.635397	1.01048	-0.682598	-0.400279	-1.49271	-1.23892	-1.57382	-0.989633
5A	86373529	TuG1812G0500000858.01	TuG1812G0500000858.01.T01	comp516_c0_seq1	98.068	207	4	0	88	294	2492	2286	4.65e-99	361	1.67381	1.60964	0.746544	0.78286	0.514129	0.937755	-0.597439	-0.621256	-1.33951	-1.27737	-1.94504	-1.06638
5A	86777081	TuG1812G0500000859.01	TuG1812G0500000859.01.T01	TC269246	98.92	463	4	1	1	463	1619	2080	0	826	1.24563	1.2058	1.07198	0.579578	1.11092	0.886868	-0.802804	-0.829322	-0.932854	-1.72539	-0.900153	-1.12756
5A	86777081	TuG1812G0500000859.01	TuG1812G0500000859.01.T01	TC430906	99.601	501	0	2	1	500	1603	2102	0	913	2.58528	1.15485	2.19541	0.214785	0.237686	0.609054	-0.386806	-0.86591	-0.455495	-4.65583	-4.20724	-1.64189
5A	86777081	TuG1812G0500000859.01	TuG1812G0500000859.01.T01	comp25141_c0_seq1	98.601	143	1	1	1	143	1986	2127	1.5e-66	252	0.344704	2.88714	NA	1.71828	0.396143	0.947417	-2.90104	-0.346364	0	-0.581978	-2.52434	-1.0555
5A	86781330	TuG1812G0500000860.01	TuG1812G0500000860.01.T01	CJ880756	99.717	353	1	0	1	353	1694	2046	0	647	1.03411	3.17585	0.329312	0.390517	0.0742768	0.730865	-0.967014	-0.314876	-3.03663	-2.5607	-13.4632	-1.36824
5A	86781330	TuG1812G0500000860.01	TuG1812G0500000860.01.T01	comp10236_c0_seq1	97.814	366	8	0	18	383	2133	1768	1.19e-180	632	1.94601	2.32403	0.42293	0.640991	0.322801	0.980954	-0.513872	-0.430288	-2.36446	-1.56008	-3.09788	-1.01942
5A	87213437	TuG1812G0500000861.01	TuG1812G0500000861.01.T01	TC419890	96.6	500	7	10	1	500	1636	2125	0	821	1.29264	0.962379	0.82328	0.357974	0.594214	1.52264	-0.773611	-1.03909	-1.21465	-2.7935	-1.68289	-0.656756
5A	87213437	TuG1812G0500000861.01	TuG1812G0500000861.01.T01	TC459617	86.627	501	66	1	1	500	611	1111	1.26e-156	553	NA	0	NA	0.477299	2.37686	1.21811	0	NA	0	-2.09512	-0.420724	-0.820945
5A	87213437	TuG1812G0500000861.01	TuG1812G0500000861.01.T01	comp10779_c0_seq1	98.153	379	4	1	1	376	1809	2187	0	658	0.52908	0.812675	1.05197	0.976294	1.02104	0.990728	-1.89007	-1.2305	-0.950599	-1.02428	-0.97939	-1.00936
5A	87530494	TuG1812G0500000862.01	TuG1812G0500000862.01.T01	BQ825892	87.852	461	20	11	1	457	1853	2281	2.52e-143	508	1.03411	1.15485	0.329312	0.715949	1.3865	1.21811	-0.967014	-0.86591	-3.03663	-1.39675	-0.721241	-0.820945
5A	87530494	TuG1812G0500000862.01	TuG1812G0500000862.01.T01	TC372650	94.336	512	7	8	1	499	1752	2254	0	765	NA	0.769903	NA	0	NA	0	0	-1.29886	0	NA	0	NA
5A	87530494	TuG1812G0500000862.01	TuG1812G0500000862.01.T01	TC409572	96.643	417	5	4	1	415	1897	2306	0	684	NA	NA	NA	0	1.18843	0.812072	0	NA	NA	NA	-0.841447	-1.23142
5A	87858433	TuG1812G0500000863.01	TuG1812G0500000863.01.T01	DN158464	94.578	166	5	2	1	163	4451	4615	4.2e-67	254	1.03411	0	NA	0	0	NA	-0.967014	NA	0	NA	NA	0
5A	89586908	TuG1812G0500000872.01	TuG1812G0500000872.01.T01	comp29706_c0_seq1	100	84	0	0	1	84	159	242	2.19e-37	156	1.24093	1.53981	3.01869	0.357974	0.648234	0.974487	-0.805845	-0.649432	-0.331269	-2.7935	-1.54265	-1.02618
5A	90729395	TuG1812G0500000880.01	TuG1812G0500000880.01.T02	TC420645	98.6	500	7	0	1	500	1925	2424	0	885	1.03411	0.747259	0.82328	1.62716	0.891321	0.820899	-0.967014	-1.33822	-1.21465	-0.614569	-1.12193	-1.21818
5A	91055736	TuG1812G0500000881.01	TuG1812G0500000881.01.T01	TC440716	99.2	500	2	2	1	500	794	1291	0	900	1.55117	1.67255	0.480247	0.86555	0.567608	1.53044	-0.644676	-0.59789	-2.08226	-1.15533	-1.76178	-0.653405
5A	91055736	TuG1812G0500000881.01	TuG1812G0500000881.01.T01	comp12531_c0_seq1	99.134	231	2	0	1	231	1059	1289	8.27e-116	416	2.0885	1.37413	0.600308	0.556487	0.492177	1.03139	-0.478813	-0.727733	-1.66581	-1.79699	-2.03179	-0.969565
5A	91060546	TuG1812G0500000882.01	TuG1812G0500000882.01.T01	TC421519	95.219	502	15	9	1	499	284	779	0	785	NA	0	0	1.07392	0.594214	0.609054	0	NA	NA	-0.931165	-1.68289	-1.64189
5A	91060546	TuG1812G0500000882.01	TuG1812G0500000882.01.T01	comp4497_c0_seq1	89.873	316	15	8	18	330	770	469	6.73e-108	390	2.9494	2.53929	0.82328	0.696929	0.676999	1.1319	-0.339052	-0.393811	-1.21465	-1.43487	-1.47711	-0.883467
5A	91336028	TuG1812G0500000883.01	TuG1812G0500000883.01.T01	comp26561_c0_seq1	100	283	0	0	1	283	2389	2107	5.38e-148	523	0	0.89822	0.548853	0.306835	1.86753	2.13169	NA	-1.11331	-1.82198	-3.25908	-0.535467	-0.469112
5A	91337921	TuG1812G0500000884.01	TuG1812G0500000884.01.T01	comp33422_c0_seq1	98.925	93	1	0	1	93	1055	1147	7.5e-41	167	1.03411	0.230971	NA	NA	4.75371	2.43622	-0.967014	-4.32955	0	NA	-0.210362	-0.410473
5A	91473709	TuG1812G0500000885.01	TuG1812G0500000885.01.T01	TC397962	99.4	500	2	1	1	500	2291	2789	0	905	1.83555	1.68416	0.885247	0.66388	0.945631	1.31427	-0.544797	-0.593767	-1.12963	-1.5063	-1.05749	-0.760876
5A	91473709	TuG1812G0500000885.01	TuG1812G0500000885.01.T01	TC440461	90.278	360	27	4	5	356	2267	2626	4.41e-130	464	NA	NA	NA	NA	0.297107	0.609054	0	NA	0	NA	-3.36579	-1.64189
5A	91473709	TuG1812G0500000885.01	TuG1812G0500000885.01.T01	comp27531_c0_seq1	100	112	0	0	1	112	2549	2660	2.46e-53	207	5.17056	1.38583	2.19541	0.379032	0.990357	1.0963	-0.193403	-0.721592	-0.455495	-2.6383	-1.00974	-0.912161
5A	91473709	TuG1812G0500000885.01	TuG1812G0500000885.01.T01	comp30679_c0_seq1	100	156	0	0	1	156	2637	2792	2.7e-77	289	4.13645	0.35534	0.61746	0.536962	0.8319	1.0963	-0.241753	-2.81421	-1.61954	-1.86233	-1.20207	-0.912161
5A	92635365	TuG1812G0500000887.01	TuG1812G0500000887.01.T01	TC436790	96.607	501	16	1	1	500	1226	1726	0	830	0	NA	NA	0	NA	1.21811	NA	NA	0	NA	NA	-0.820945
5A	93524827	TuG1812G0500000889.01	TuG1812G0500000889.01.T01	comp3586_c0_seq1	99.529	425	2	0	1	425	617	1041	0	774	0.584498	0.640972	1.2018	1.66154	1.81312	0.825607	-1.71087	-1.56013	-0.832086	-0.601851	-0.551537	-1.21123
5A	94316050	TuG1812G0500000892.01	TuG1812G0500000892.01.T01	CA678158	94.199	362	13	8	1	360	3005	3360	4.21e-156	551	1.03411	NA	NA	NA	NA	NA	-0.967014	NA	NA	NA	NA	NA
5A	94316050	TuG1812G0500000892.01	TuG1812G0500000892.01.T01	TC376322	99.374	479	3	0	1	479	3049	3527	0	869	0.620467	1.73228	1.37213	1.07392	1.42611	1.04409	-1.61169	-0.577273	-0.728792	-0.931165	-0.701206	-0.957769
5A	94316050	TuG1812G0500000892.01	TuG1812G0500000892.01.T01	comp6745_c0_seq1	98.344	483	5	2	18	500	3790	3311	0	845	1.16338	0.919796	1.07026	0.86555	1.01712	1.0504	-0.859568	-1.0872	-0.934349	-1.15533	-0.983165	-0.95202
5A	94319866	TuG1812G0500000893.01	TuG1812G0500000893.01.T01	CV780041	98.28	465	7	1	1	464	249	713	0	813	0	0	NA	NA	NA	1.21811	NA	NA	NA	NA	NA	-0.820945
5A	94319866	TuG1812G0500000893.01	TuG1812G0500000893.01.T01	TC374710	99.441	179	0	1	1	179	601	778	1.08e-87	324	0	0	NA	0	3.56529	0.456791	NA	NA	NA	NA	-0.280482	-2.18919
5A	94811827	TuG1812G0500000895.01	TuG1812G0500000895.01.T01	TC372642	92.917	480	20	9	1	477	557	89	0	686	NA	NA	NA	NA	0	1.21811	NA	NA	0	NA	NA	-0.820945
5A	94811827	TuG1812G0500000895.01	TuG1812G0500000895.01.T01	comp29664_c0_seq1	96.471	255	5	2	4	258	341	91	2.53e-116	418	0.443191	4.61942	NA	0	2.773	4.38519	-2.25637	-0.216477	0	NA	-0.36062	-0.22804
5A	94877107	TuG1812G0500000898.01	TuG1812G0500000898.01.T01	TC247260	94.213	432	16	2	1	424	700	1130	0	651	0.861759	1.30884	2.12681	0.740637	1.18843	1.41044	-1.16042	-0.764038	-0.470189	-1.35019	-0.841447	-0.708998
5A	94877107	TuG1812G0500000898.01	TuG1812G0500000898.01.T01	TC426784	99.101	445	3	1	1	445	687	1130	0	798	2.01652	1.3353	1.07026	1.05508	1.10147	1.32885	-0.495905	-0.748895	-0.934349	-0.947793	-0.907877	-0.752533
5A	94877107	TuG1812G0500000898.01	TuG1812G0500000898.01.T01	comp10163_c0_seq1	100	271	0	0	1	271	884	1154	2.83e-141	501	1.15138	1.13722	0.82328	0.73099	0.763211	1.44601	-0.868522	-0.879335	-1.21465	-1.36801	-1.31025	-0.691557
5A	94923738	TuG1812G0500000899.01	TuG1812G0500000899.01.T01	DR737816	95.652	368	8	8	1	363	418	54	4.48e-166	584	0.710952	0.629921	1.82951	1.35653	1.88168	0.824014	-1.40657	-1.5875	-0.546594	-0.737173	-0.53144	-1.21357
5A	94923738	TuG1812G0500000899.01	TuG1812G0500000899.01.T01	TC257127	95.354	452	17	1	1	452	449	2	0	715	0.799086	0.664437	2.67566	1.591	1.65347	0.991288	-1.25143	-1.50503	-0.37374	-0.628537	-0.60479	-1.00879
5A	94923738	TuG1812G0500000899.01	TuG1812G0500000899.01.T01	TC405613	99.4	500	3	0	1	500	502	3	0	907	0.640164	0.188548	3.29312	0.409114	1.72322	0.286614	-1.5621	-5.3037	-0.303663	-2.44431	-0.580309	-3.48902
5A	94923738	TuG1812G0500000899.01	TuG1812G0500000899.01.T02	comp314_c0_seq1	99.387	326	1	1	19	343	25	350	6.99e-168	590	0.707832	0.719433	3.15762	1.05566	2.10546	0.906432	-1.41276	-1.38998	-0.316694	-0.947273	-0.474956	-1.10323
5A	95040307	TuG1812G0500000901.01	TuG1812G0500000901.01.T01	TC241545	86.745	513	41	16	1	493	1786	2291	2.11e-154	545	NA	NA	0.274427	NA	NA	NA	NA	NA	-3.64396	NA	NA	NA
5A	95040307	TuG1812G0500000901.01	TuG1812G0500000901.01.T01	TC244234	95.661	484	19	2	1	483	1660	2142	0	776	NA	NA	NA	0	1.18843	0.609054	0	NA	0	NA	-0.841447	-1.64189
5A	95040307	TuG1812G0500000901.01	TuG1812G0500000901.01.T01	TC381889	99.399	499	3	0	1	499	1818	2316	0	905	1.78619	1.29072	0.48787	1.4319	0.875684	1.56614	-0.55985	-0.774762	-2.04973	-0.698374	-1.14196	-0.638513
5A	95040307	TuG1812G0500000901.01	TuG1812G0500000901.01.T01	TC397784	91.496	341	25	4	2	342	1536	1872	1.69e-130	466	NA	0	0.274427	0	0.594214	0.609054	NA	NA	-3.64396	NA	-1.68289	-1.64189
5A	95040307	TuG1812G0500000901.01	TuG1812G0500000901.01.T01	TC423354	94.291	508	20	5	1	500	1795	2301	0	769	0.344704	NA	NA	2.14785	NA	NA	-2.90104	0	NA	-0.465583	0	NA
5A	95040307	TuG1812G0500000901.01	TuG1812G0500000901.01.T01	TC423880	95.088	509	16	9	1	500	858	1366	0	795	NA	0.384951	NA	0	NA	0	NA	-2.59773	0	NA	NA	NA
5A	95040307	TuG1812G0500000901.01	TuG1812G0500000901.01.T01	TC441921	91.2	500	38	6	1	499	1422	1916	0	675	NA	NA	0.274427	4.29569	NA	NA	0	0	-3.64396	-0.232791	0	0
5A	95040307	TuG1812G0500000901.01	TuG1812G0500000901.01.T02	TC460299	90.405	469	44	1	1	468	496	964	1.59e-175	616	NA	1.15485	NA	NA	1.18843	1.21811	0	-0.86591	0	NA	-0.841447	-0.820945
5A	95040307	TuG1812G0500000901.01	TuG1812G0500000901.01.T01	comp301_c0_seq2	89.014	355	20	3	1	344	1992	2338	2.9e-117	422	2.02543	1.56901	0.984791	1.04615	0.835645	1.10563	-0.493722	-0.637345	-1.01544	-0.955887	-1.19668	-0.904458
5A	95040307	TuG1812G0500000901.01	TuG1812G0500000901.01.T01	comp305_c0_seq1	84.298	242	21	14	153	381	2247	2010	1.1e-56	220	1.37713	1.21459	0.616339	0.703727	0.679427	0.698729	-0.726146	-0.823324	-1.62248	-1.42101	-1.47183	-1.43117
5A	95948237	TuG1812G0500000902.01	TuG1812G0500000902.01.T01	comp19647_c0_seq1	99.598	249	1	0	1	249	1492	1740	2.21e-127	455	0.413645	0.216535	0.768394	0.715949	0.495179	1.08276	-2.41753	-4.61819	-1.30141	-1.39675	-2.01947	-0.923563
5A	96554111	TuG1812G0500000903.01	TuG1812G0500000903.01.T01	CA690800	98.065	465	7	2	1	465	1936	2398	0	809	NA	3.46456	0.82328	1.07392	0	0.609054	0	-0.288637	-1.21465	-0.931165	NA	-1.64189
5A	96554111	TuG1812G0500000903.01	TuG1812G0500000903.01.T01	TC240107	88.105	496	49	7	1	495	2073	2559	5.8e-165	580	NA	1.15485	NA	NA	0	NA	NA	-0.86591	NA	NA	NA	NA
5A	96554111	TuG1812G0500000903.01	TuG1812G0500000903.01.T01	TC391916	98.397	499	7	1	1	499	911	1408	0	878	NA	NA	NA	0	0	1.21811	0	0	NA	NA	NA	-0.820945
5A	96554111	TuG1812G0500000903.01	TuG1812G0500000903.01.T01	comp2417_c0_seq1	98.565	418	4	1	1	416	2217	2634	0	737	2.23187	2.15528	0.558316	0.73946	0.500988	1.15801	-0.448055	-0.463977	-1.7911	-1.35234	-1.99605	-0.863549
5A	96917329	TuG1812G0500000905.01	TuG1812G0500000905.01.T01	CK207271	93.023	258	11	6	1	256	2442	2694	1.37e-101	370	1.55117	1.92476	NA	1.4319	0.475371	1.82716	-0.644676	-0.519546	0	-0.698374	-2.10362	-0.547297
5A	96917329	TuG1812G0500000905.01	TuG1812G0500000905.01.T01	TC441924	96.593	499	17	0	2	500	1874	2372	0	830	NA	2.30971	NA	0	1.18843	0.609054	NA	-0.432955	0	NA	-0.841447	-1.64189
5A	96917329	TuG1812G0500000905.01	TuG1812G0500000905.01.T01	comp43398_c0_seq1	98.387	124	2	0	1	124	2243	2366	1.1e-56	219	0	0	NA	0	1.18843	NA	NA	NA	NA	NA	-0.841447	NA
5A	96917329	TuG1812G0500000905.01	TuG1812G0500000905.01.T01	comp8398_c0_seq1	92.355	327	5	2	1	307	2434	2760	3.82e-125	448	0.689408	0.577427	0.41164	0	NA	NA	-1.45052	-1.73182	-2.42931	NA	0	0
5A	96917329	TuG1812G0500000905.01	TuG1812G0500000905.01.T01	comp8398_c0_seq2	93.289	298	5	1	1	283	2434	2731	1.72e-118	425	NA	NA	NA	NA	1.18843	NA	NA	NA	0	NA	-0.841447	NA
5A	98220660	TuG1812G0500000909.01	TuG1812G0500000909.01.T01	TC280551	98.2	500	9	0	1	500	3535	4034	0	874	1.03411	NA	NA	0	1.18843	NA	-0.967014	0	0	NA	-0.841447	NA
5A	98220660	TuG1812G0500000909.01	TuG1812G0500000909.01.T01	TC381677	99.6	500	2	0	1	500	4044	4543	0	913	2.97307	1.49452	0.884263	1.02723	0.792286	2.03018	-0.336353	-0.669112	-1.13088	-0.973491	-1.26217	-0.492567
5A	98220660	TuG1812G0500000909.01	TuG1812G0500000909.01.T01	TC421845	99	500	5	0	1	500	1894	2393	0	896	NA	3.46456	1.64656	0.357974	2.37686	0.406036	0	-0.288637	-0.607327	-2.7935	-0.420724	-2.46284
5A	98220660	TuG1812G0500000909.01	TuG1812G0500000909.01.T01	comp17872_c0_seq1	97.701	174	0	2	1	174	4268	4437	7.43e-80	296	2.9546	1.51019	5.21411	1.32175	0.950743	1.4465	-0.338455	-0.662166	-0.191787	-0.756572	-1.05181	-0.691322
5A	99880162	TuG1812G0500000912.01	TuG1812G0500000912.01.T02	TC404748	95.918	441	4	1	1	427	1037	1477	0	702	0	1.15485	0	NA	1.18843	NA	NA	-0.86591	NA	NA	-0.841447	NA
5A	99880162	TuG1812G0500000912.01	TuG1812G0500000912.01.T03	TC406005	98	500	10	0	1	500	776	1275	0	869	NA	1.15485	NA	NA	1.18843	NA	NA	-0.86591	NA	NA	-0.841447	0
5A	99880162	TuG1812G0500000912.01	TuG1812G0500000912.01.T01	comp8145_c0_seq1	98.667	225	3	0	49	273	2040	1816	9.09e-111	399	1.91086	1.38233	0.999697	0.946075	0.985526	1.50057	-0.523325	-0.723418	-1.0003	-1.057	-1.01469	-0.666414
5A	100810118	TuG1812G0500000913.01	TuG1812G0500000913.01.T01	comp16176_c0_seq1	99.679	312	1	0	35	346	1327	1016	2.36e-162	571	1.33979	1.18874	0.77882	0.823286	0.711493	1.1166	-0.746385	-0.841228	-1.28399	-1.21465	-1.40549	-0.895577
5A	101176844	TuG1812G0500000915.01	TuG1812G0500000915.01.T01	TC273836	91.207	489	35	6	2	485	156	641	0	658	0.590921	0.923884	1.09771	0	0	3.65432	-1.69227	-1.08239	-0.91099	NA	NA	-0.273648
5A	101176844	TuG1812G0500000915.01	TuG1812G0500000915.01.T01	TC417514	97.536	487	12	0	1	487	121	607	0	833	1.37882	2.30971	0.82328	0.286379	0.742768	1.0963	-0.72526	-0.432955	-1.21465	-3.49187	-1.34632	-0.912161
5A	101176844	TuG1812G0500000915.01	TuG1812G0500000915.01.T01	TC452507	99.367	474	3	0	27	500	91	564	0	859	1.11366	0.716806	3.70476	0.572759	0.544696	0.609054	-0.897941	-1.39508	-0.269923	-1.74594	-1.83589	-1.64189
5A	101176844	TuG1812G0500000915.01	TuG1812G0500000915.01.T01	comp2939_c0_seq1	97.233	253	3	1	15	263	607	355	1.45e-118	425	1.09305	1.01689	0.860059	0.571294	0.525576	0.837004	-0.914871	-0.983395	-1.16271	-1.75041	-1.90268	-1.19474
5A	101398848	TuG1812G0500000916.01	TuG1812G0500000916.01.T01	TC246353	92.262	504	29	5	1	500	2434	2931	0	706	NA	0.577427	NA	0	1.18843	NA	NA	-1.73182	NA	NA	-0.841447	0
5A	101398848	TuG1812G0500000916.01	TuG1812G0500000916.01.T01	comp15383_c0_seq1	98.927	466	5	0	1	466	2624	3089	0	833	2.01077	1.41882	1.15651	1.50349	1.07631	1.54492	-0.497321	-0.70481	-0.864669	-0.665118	-0.929098	-0.647284
5A	104371323	TuG1812G0500000926.01	TuG1812G0500000926.01.T01	comp17100_c0_seq1	93.939	165	7	1	4	165	600	764	1.82e-64	246	0.0608301	0	0	0	0	0	-16.4392	NA	NA	NA	NA	NA
5A	105096710	TuG1812G0500000931.01	TuG1812G0500000931.01.T01	comp8603_c0_seq1	96.517	201	3	2	408	608	3207	3011	2.84e-89	329	0.369325	0.135865	0.182951	0.247828	0.504182	0.529612	-2.70764	-7.36023	-5.46594	-4.03505	-1.98341	-1.88817
5A	105712675	TuG1812G0500000933.01	TuG1812G0500000933.01.T01	TC373418	94.521	292	15	1	98	388	536	827	1.71e-125	449	0.89623	1.21564	0.583157	0.536962	0.679102	0.730865	-1.11579	-0.822614	-1.71481	-1.86233	-1.47253	-1.36824
5A	105712675	TuG1812G0500000933.01	TuG1812G0500000933.01.T01	comp26707_c0_seq1	92.627	217	14	2	1	215	558	774	3.38e-84	311	1.72352	0.641586	1.37213	0.23865	0.990357	0.730865	-0.580208	-1.55864	-0.728792	-4.19024	-1.00974	-1.36824
5A	106183555	TuG1812G0500000935.01	TuG1812G0500000935.01.T01	TC254280	94.343	495	23	3	3	496	2198	2688	0	754	NA	NA	0.274427	0	0	0.609054	0	0	-3.64396	NA	NA	-1.64189
5A	106183555	TuG1812G0500000935.01	TuG1812G0500000935.01.T01	TC406388	97.976	494	6	3	1	492	2238	2729	0	856	1.72352	2.30971	0.699788	1.02979	0.352815	1.24856	-0.580208	-0.432955	-1.429	-0.971072	-2.83435	-0.800922
5A	106183555	TuG1812G0500000935.01	TuG1812G0500000935.01.T01	comp33180_c0_seq1	100	181	0	0	1	181	2389	2569	1.65e-91	335	1.62503	1.7205	0.666465	0.555226	0.396143	0.917995	-0.615372	-0.581227	-1.50045	-1.80107	-2.52434	-1.08933
5A	106183555	TuG1812G0500000936.01	TuG1812G0500000936.01.T01	CA642114	95.165	455	7	14	1	440	624	170	0	713	2.75763	3.27209	0.82328	0.683406	0.216078	0.664423	-0.36263	-0.305615	-1.21465	-1.46326	-4.62796	-1.50507
5A	106183555	TuG1812G0500000936.01	TuG1812G0500000936.01.T01	TC387228	97.551	490	8	3	1	489	538	52	0	835	2.06822	3.46456	0.274427	0.715949	0	3.65432	-0.483507	-0.288637	-3.64396	-1.39675	NA	-0.273648
5A	106267494	TuG1812G0500000937.01	TuG1812G0500000937.01.T01	comp38599_c0_seq1	100	134	0	0	1	134	1476	1609	1.81e-65	248	4.13645	1.73228	0.137213	0.429569	0.594214	2.43622	-0.241753	-0.577273	-7.28792	-2.32791	-1.68289	-0.410473
5A	107845475	TuG1812G0500000938.01	TuG1812G0500000938.01.T01	CA682946	100	30	0	0	1	30	2096	2125	4.34e-07	56.5	2.06822	5.77427	0.0914755	1.07392	0.594214	1.62414	-0.483507	-0.173182	-10.9319	-0.931165	-1.68289	-0.615709
5A	107845475	TuG1812G0500000938.01	TuG1812G0500000938.01.T01	TC458924	80.822	511	85	10	1	500	467	975	3.77e-107	388	1.03411	0	NA	4.29569	0	0	-0.967014	NA	0	-0.232791	NA	NA
5A	107845475	TuG1812G0500000938.01	TuG1812G0500000938.01.T01	comp36661_c0_seq1	98.077	52	1	0	1	52	2074	2125	3.54e-18	91.6	2.06822	0.769903	0.82328	1.07392	0	1.21811	-0.483507	-1.29886	-1.21465	-0.931165	NA	-0.820945
5A	108069839	TuG1812G0500000941.01	TuG1812G0500000941.01.T01	TC404907	97.006	501	14	1	1	500	1610	2110	0	843	0	3.46456	NA	1.07392	0.594214	1.21811	NA	-0.288637	0	-0.931165	-1.68289	-0.820945
5A	108069839	TuG1812G0500000941.01	TuG1812G0500000941.01.T01	comp11479_c0_seq1	99.057	212	2	0	1	212	1925	2136	2.5e-105	381	0.979684	1.01272	0.731804	0.527541	0.730388	0.64793	-1.02074	-0.987441	-1.36649	-1.89559	-1.36913	-1.54338
5A	108076130	TuG1812G0500000942.01	TuG1812G0500000942.01.T01	comp12954_c0_seq1	98.54	274	4	0	1	274	2024	2297	3.34e-136	484	1.9489	1.51955	0.518361	1.04409	0.806434	1.15314	-0.513109	-0.658092	-1.92916	-0.95777	-1.24003	-0.867196
5A	108445604	TuG1812G0500000945.01	TuG1812G0500000945.01.T01	TC372281	99.197	498	4	0	1	498	456	953	0	898	0.912451	0.739107	1.88668	1.0068	0.749227	0.583677	-1.09595	-1.35298	-0.530031	-0.993243	-1.33471	-1.71328
5A	108448536	TuG1812G0500000946.01	TuG1812G0500000946.01.T01	comp7636_c0_seq1	98.011	352	6	1	1	351	381	732	5.2e-174	610	1.10019	1.13041	0.584648	0.597662	0.447814	0.816609	-0.908935	-0.884632	-1.71043	-1.67319	-2.23307	-1.22458
5A	108465109	TuG1812G0500000947.01	TuG1812G0500000947.01.T01	CK210042	96.104	385	15	0	1	385	724	1108	2.04e-179	628	NA	NA	NA	3.22177	0	NA	0	0	NA	-0.310388	NA	0
5A	108465109	TuG1812G0500000947.01	TuG1812G0500000947.01.T01	TC384160	99.366	473	1	2	2	472	720	1192	0	856	NA	1.15485	NA	2.14785	NA	NA	0	-0.86591	NA	-0.465583	0	NA
5A	108465109	TuG1812G0500000947.01	TuG1812G0500000947.01.T01	comp9160_c0_seq1	97.414	348	7	2	31	377	1303	957	1.98e-168	592	1.68344	1.20507	0.812303	0.607472	0.679102	0.669411	-0.594023	-0.82983	-1.23107	-1.64617	-1.47253	-1.49385
5A	108651964	TuG1812G0500000949.01	TuG1812G0500000949.01.T01	comp12709_c0_seq1	100	270	0	0	1	270	2612	2881	9.98e-141	499	1.06858	1.02654	1.39958	1.45499	0.460819	0.692107	-0.93582	-0.974149	-0.714502	-0.687289	-2.17005	-1.44486
5A	108651964	TuG1812G0500000949.01	TuG1812G0500000949.01.T01	comp26224_c0_seq1	97.26	146	4	0	1	146	2543	2688	1.72e-65	248	0	3.46456	NA	NA	1.18843	0	NA	-0.288637	0	0	-0.841447	NA
5A	108660127	TuG1812G0500000951.01	TuG1812G0500000951.01.T01	TC436864	100	500	0	0	1	500	1276	1775	0	924	1.39909	1.18882	1.2775	0.826095	0.679102	1.21811	-0.714749	-0.84117	-0.782777	-1.21052	-1.47253	-0.820945
5A	108660127	TuG1812G0500000951.01	TuG1812G0500000951.01.T01	comp10066_c0_seq1	97.727	176	0	1	1	176	1532	1703	5.82e-81	300	1.10083	1.03539	2.69853	0.902095	0.885	1.51213	-0.908407	-0.965823	-0.370572	-1.10853	-1.12994	-0.661317
5A	108665876	TuG1812G0500000952.01	TuG1812G0500000952.01.T01	TC368603	99.399	499	3	0	1	499	2481	2979	0	905	2.32675	2.07874	5.48853	0.826095	1.58457	1.37037	-0.429784	-0.481061	-0.182198	-1.21052	-0.631086	-0.729729
5A	108665876	TuG1812G0500000952.01	TuG1812G0500000952.01.T01	TC498631	94.083	507	22	5	1	500	2466	2971	0	763	NA	NA	NA	2.14785	NA	NA	0	NA	NA	-0.465583	NA	NA
5A	108665876	TuG1812G0500000952.01	TuG1812G0500000952.01.T01	comp19519_c0_seq1	97.674	215	4	1	1	214	2978	2764	1.97e-101	368	1.73284	2.65617	2.5965	0.412386	1.54808	0.909912	-0.577089	-0.376483	-0.385134	-2.42491	-0.64596	-1.09901
5A	108721868	TuG1812G0500000953.01	TuG1812G0500000953.01.T01	BX901642	89.738	497	44	7	1	494	4938	5430	2.04e-179	628	NA	NA	0.548853	0	1.18843	1.21811	NA	0	-1.82198	NA	-0.841447	-0.820945
5A	108721868	TuG1812G0500000953.01	TuG1812G0500000953.01.T01	TC368580	98.8	500	2	1	1	500	4035	4530	0	887	3.30916	0.88835	1.55508	2.14785	1.45252	1.99327	-0.302192	-1.12568	-0.643052	-0.465583	-0.688457	-0.501689
5A	109173798	TuG1812G0500000954.01	TuG1812G0500000954.01.T02	CJ800441	97.5	160	4	0	1	160	2906	3065	1.1e-72	274	NA	NA	NA	0	1.18843	NA	NA	NA	NA	NA	-0.841447	0
5A	109173798	TuG1812G0500000954.01	TuG1812G0500000954.01.T01	TC381555	98.204	501	8	1	1	500	3276	3776	0	874	0.379174	0.43307	0.189988	0.300698	0.334245	0.304527	-2.63731	-2.30909	-5.2635	-3.32559	-2.99181	-3.28378
5A	109173798	TuG1812G0500000954.01	TuG1812G0500000954.01.T01	TC424186	89.515	515	35	16	1	498	3089	3601	0	652	1.80969	2.88714	0.274427	1.19325	1.18843	4.26338	-0.552579	-0.346364	-3.64396	-0.838049	-0.841447	-0.234556
5A	109173798	TuG1812G0500000954.01	TuG1812G0500000954.01.T01	comp13252_c0_seq1	98.516	539	6	2	2	539	3836	3299	0	950	1.55117	1.14692	0.987398	0.935008	1.06924	0.83668	-0.644676	-0.871902	-1.01276	-1.06951	-0.935248	-1.1952
5A	109199779	TuG1812G0500000955.01	TuG1812G0500000955.01.T01	comp21010_c0_seq1	100	266	0	0	1	266	547	812	1.42e-138	492	2.17163	1.88976	3.20164	0.536962	2.57493	5.78601	-0.460483	-0.529167	-0.31234	-1.86233	-0.38836	-0.172831
5A	109199779	TuG1812G0500000955.01	TuG1812G0500000955.01.T01	comp43324_c0_seq1	100	154	0	0	1	154	805	958	1.59e-76	285	1.03411	2.30971	0.82328	0	NA	3.65432	-0.967014	-0.432955	-1.21465	NA	NA	-0.273648
5A	110297674	TuG1812G0500000959.01	TuG1812G0500000959.01.T01	TC390529	99.8	500	1	0	1	500	562	1061	0	918	21.3716	16.5529	3.0971	16.7532	10.8656	8.96971	-0.046791	-0.0604123	-0.322883	-0.0596901	-0.0920333	-0.111486
5A	110297674	TuG1812G0500000959.01	TuG1812G0500000959.01.T01	comp608_c0_seq1	97.842	556	11	1	5	560	1213	659	0	959	0.944578	0.655013	0.973131	0.524149	0.74089	0.658217	-1.05867	-1.52669	-1.02761	-1.90785	-1.34973	-1.51926
5A	110541583	TuG1812G0500000960.01	TuG1812G0500000960.01.T01	comp6885_c0_seq1	95.419	764	24	4	5	764	746	1502	0	1206	1.13659	1.01861	1.68989	0.875937	1.12787	1.02058	-0.879824	-0.981732	-0.591754	-1.14163	-0.886626	-0.979838
5A	110831782	TuG1812G0500000962.01	TuG1812G0500000962.01.T01	CA732293	97.83	507	4	1	1	500	1272	1778	0	869	NA	NA	NA	0	NA	1.21811	NA	0	NA	NA	NA	-0.820945
5A	111016949	TuG1812G0500000963.01	TuG1812G0500000963.01.T01	comp39133_c0_seq1	96.129	155	6	0	1	155	325	479	3.96e-67	254	0.517056	1.15485	NA	NA	0	0.609054	-1.93403	-0.86591	NA	NA	NA	-1.64189
5A	111743235	TuG1812G0500000964.01	TuG1812G0500000964.01.T03	TC239290	94.589	462	20	3	1	462	823	1279	0	710	2.06822	1.96325	0.384197	0.768982	0.555629	0.960431	-0.483507	-0.509359	-2.60283	-1.30042	-1.79976	-1.0412
5A	111743235	TuG1812G0500000964.01	TuG1812G0500000964.01.T03	TC374213	98.8	500	5	1	1	500	781	1279	0	889	1.40344	0.769903	0.371283	0.996103	0.507256	0.666153	-0.712537	-1.29886	-2.69336	-1.00391	-1.97139	-1.50116
5A	111743235	TuG1812G0500000964.01	TuG1812G0500000964.01.T03	comp20907_c0_seq1	99.254	134	1	0	1	134	1144	1277	8.31e-64	243	1.37882	0.824896	0.548853	1.07392	0.475371	0.730865	-0.72526	-1.21227	-1.82198	-0.931165	-2.10362	-1.36824
5A	111754132	TuG1812G0500000965.01	TuG1812G0500000965.01.T02	TC378390	98.994	497	5	0	1	497	1086	1582	0	891	1.27275	2.30971	0.928828	0.969995	1.50839	1.52264	-0.785699	-0.432955	-1.07663	-1.03093	-0.662959	-0.656756
5A	111754132	TuG1812G0500000965.01	TuG1812G0500000965.01.T02	comp10169_c0_seq1	99.504	403	2	0	1	403	1694	1292	0	734	0.846426	1.00355	0.806923	0.906767	1.22347	1.15501	-1.18144	-0.996463	-1.23928	-1.10282	-0.817349	-0.865795
5A	111799432	TuG1812G0500000968.01	TuG1812G0500000968.01.T01	TC397250	99.8	500	1	0	1	500	1326	1825	0	918	1.03411	5.77427	0.686067	1.28871	8.319	1.52264	-0.967014	-0.173182	-1.45758	-0.775971	-0.120207	-0.656756
5A	111799432	TuG1812G0500000968.01	TuG1812G0500000968.01.T01	comp14898_c0_seq2	100	248	0	0	24	271	1584	1831	1.55e-128	459	0	1.15485	0	0	0	0	NA	-0.86591	NA	NA	NA	NA
5A	111800558	TuG1812G0500000969.01	TuG1812G0500000969.01.T01	comp27293_c0_seq1	93.878	147	1	4	1	147	139	1	2.55e-55	215	1.44776	1.15485	11.5259	0.61367	2.05274	4.87243	-0.690724	-0.86591	-0.086761	-1.62954	-0.487154	-0.205236
5A	112978933	TuG1812G0500000970.01	TuG1812G0500000970.01.T01	comp40455_c0_seq1	98.425	127	2	0	1	127	1833	1959	2.89e-58	224	NA	1.53981	NA	NA	NA	1.21811	0	-0.649432	0	NA	NA	-0.820945
5A	113558716	TuG1812G0500000974.01	TuG1812G0500000974.01.T01	TC447785	99.597	248	0	1	1	247	989	1236	2.23e-126	451	NA	NA	NA	0	2.773	4.87243	0	NA	0	NA	-0.36062	-0.205236
5A	114094128	TuG1812G0500000975.01	TuG1812G0500000975.01.T01	BJ245368	99.2	500	4	0	1	500	1077	1576	0	904	0.689408	1.15485	NA	0	0	0.609054	-1.45052	-0.86591	0	NA	NA	-1.64189
5A	114094128	TuG1812G0500000975.01	TuG1812G0500000975.01.T01	BU972188	95.2	500	21	1	1	500	2612	3108	0	787	2.06822	NA	NA	NA	NA	0	-0.483507	0	NA	NA	0	NA
5A	114094128	TuG1812G0500000975.01	TuG1812G0500000975.01.T01	CD886646	98.603	501	6	1	1	500	3019	3519	0	885	NA	NA	NA	NA	0	0.609054	NA	NA	NA	NA	NA	-1.64189
5A	114094128	TuG1812G0500000975.01	TuG1812G0500000975.01.T01	TC254453	94.722	360	16	2	1	360	4332	3976	9.77e-158	556	0.738651	0.135865	1.09771	4.29569	1.01865	0.913581	-1.35382	-7.36023	-0.91099	-0.232791	-0.981689	-1.09459
5A	114094128	TuG1812G0500000975.01	TuG1812G0500000975.01.T01	TC375004	83.503	491	62	19	2	484	4315	4794	1.03e-122	440	0.258528	1.38583	0.82328	0.644354	0.396143	2.03018	-3.86806	-0.721592	-1.21465	-1.55194	-2.52434	-0.492567
5A	114094128	TuG1812G0500000975.01	TuG1812G0500000975.01.T01	TC378838	97.605	501	9	3	1	500	4335	3837	0	856	0.590921	1.10674	1.37213	3.75873	0.648234	1.6749	-1.69227	-0.903558	-0.728792	-0.266047	-1.54265	-0.597051
5A	114094128	TuG1812G0500000975.01	TuG1812G0500000975.01.T01	TC420406	96.146	493	14	5	1	491	2289	2778	0	806	5.17056	0.923884	2.46984	0	0.356529	1.21811	-0.193403	-1.08239	-0.404885	NA	-2.80482	-0.820945
5A	114094128	TuG1812G0500000975.01	TuG1812G0500000975.01.T01	TC428653	94.632	503	19	5	1	500	3368	3865	0	773	2.29803	1.67454	0.891886	0.631719	0.848877	1.21811	-0.435156	-0.597179	-1.12122	-1.58298	-1.17803	-0.820945
5A	114094128	TuG1812G0500000975.01	TuG1812G0500000975.01.T01	comp2442_c0_seq1	98.179	604	6	2	1	603	3625	4224	0	1050	0.937396	0.724643	1.2018	0.809333	1.39423	0.972851	-1.06679	-1.37999	-0.832086	-1.23558	-0.71724	-1.02791
5A	114101583	TuG1812G0500000976.01	TuG1812G0500000976.01.T01	TC430740	99.705	339	0	1	2	339	3637	3975	1.07e-176	619	0.517056	1.73228	1.37213	1.07392	0.475371	7.30865	-1.93403	-0.577273	-0.728792	-0.931165	-2.10362	-0.136824
5A	114101583	TuG1812G0500000976.01	TuG1812G0500000976.01.T01	comp22517_c0_seq1	97.403	77	1	1	138	213	3959	4035	1.24e-29	130	3.10233	0.673665	0.914755	0.991314	0.5546	2.43622	-0.322338	-1.48442	-1.09319	-1.00876	-1.8031	-0.410473
5A	114613279	TuG1812G0500000980.01	TuG1812G0500000980.01.T01	comp5676_c0_seq1	81.416	226	33	6	3	221	288	511	2.03e-43	176	0.723878	0.548067	1.23492	0.660876	0.606857	0.701335	-1.38145	-1.8246	-0.809769	-1.51314	-1.64783	-1.42585
5A	116313876	TuG1812G0500000985.01	TuG1812G0500000985.01.T01	TC395459	97.8	500	10	1	1	500	2094	2592	0	861	1.37882	1.6168	1.64656	0.357974	1.3582	0.456791	-0.72526	-0.618507	-0.607327	-2.7935	-0.736266	-2.18919
5A	116740793	TuG1812G0500000986.01	TuG1812G0500000986.01.T01	CA697007	88.84	457	26	25	1	437	203	654	9.77e-158	556	NA	2.30971	NA	0	0	0	NA	-0.432955	NA	NA	NA	NA
5A	116740793	TuG1812G0500000986.01	TuG1812G0500000986.01.T01	TC258044	95.21	501	23	1	1	500	188	688	0	791	NA	NA	NA	NA	0	2.43622	NA	NA	NA	NA	NA	-0.410473
5A	116740793	TuG1812G0500000986.01	TuG1812G0500000986.01.T01	TC379700	90.688	247	23	0	1	247	198	444	2.32e-89	329	1.72352	1.44357	1.64656	1.22734	0.891321	0.304527	-0.580208	-0.692728	-0.607327	-0.81477	-1.12193	-3.28378
5A	116740793	TuG1812G0500000986.01	TuG1812G0500000986.01.T01	TC419848	99.718	355	1	0	1	355	314	668	0	651	0.172352	1.84777	2.74427	1.07392	2.37686	0.696062	-5.80208	-0.541194	-0.364396	-0.931165	-0.420724	-1.43665
5A	116740793	TuG1812G0500000986.01	TuG1812G0500000986.01.T01	TC438412	82.836	268	23	9	1	268	200	444	5.24e-56	219	0.517056	0	0	2.14785	1.18843	1.21811	-1.93403	NA	NA	-0.465583	-0.841447	-0.820945
5A	116740793	TuG1812G0500000986.01	TuG1812G0500000986.01.T01	comp21122_c0_seq1	99.728	367	1	0	1	367	805	439	0	673	1.19569	0.790631	1.3607	1.07392	1.04141	1.04409	-0.836336	-1.26481	-0.734917	-0.931165	-0.96024	-0.957769
5A	116747286	TuG1812G0500000987.01	TuG1812G0500000987.01.T01	TC381799	98.403	501	7	1	1	500	2467	2967	0	880	0.861759	1.38583	0.137213	0.644354	0.125098	1.42113	-1.16042	-0.721592	-7.28792	-1.55194	-7.99375	-0.703667
5A	117111540	TuG1812G0500000990.01	TuG1812G0500000990.01.T01	comp3009_c0_seq1	99.511	614	3	0	118	731	1027	414	0	1118	0.808412	0.824896	1.54101	0.94941	1.09985	1.00809	-1.23699	-1.21227	-0.648925	-1.05329	-0.909215	-0.991975
5A	118060947	TuG1812G0500000996.01	TuG1812G0500000996.01.T01	comp10752_c0_seq1	94.062	421	20	3	3	423	3296	3711	0	634	1.58282	2.239	1.33178	1.4319	1.20984	1.22949	-0.631782	-0.446627	-0.750877	-0.698374	-0.826555	-0.813344
5A	118060947	TuG1812G0500000996.01	TuG1812G0500000996.01.T02	comp3842_c0_seq1	97.15	386	7	3	43	427	3202	2820	0	649	1.20165	1.14523	1.06851	0.834823	0.930874	1.30276	-0.83219	-0.873187	-0.935881	-1.19786	-1.07426	-0.767599
5A	118135420	TuG1812G0500000997.01	TuG1812G0500000997.01.T01	TC390606	90.119	253	21	2	1	253	2762	3010	3e-88	326	0	1.15485	0.548853	1.07392	0.297107	0.609054	NA	-0.86591	-1.82198	-0.931165	-3.36579	-1.64189
5A	118135420	TuG1812G0500000997.01	TuG1812G0500000997.01.T01	TC401071	98.8	500	6	0	1	500	2753	3252	0	891	3.10233	1.15485	0.274427	1.07392	0	0.812072	-0.322338	-0.86591	-3.64396	-0.931165	NA	-1.23142
5A	118135420	TuG1812G0500000997.01	TuG1812G0500000997.01.T01	comp14195_c0_seq1	98.109	423	4	2	129	551	3006	3424	0	734	1.09188	1.02551	0.749553	0.916184	0.579602	1.10942	-0.915849	-0.975124	-1.33413	-1.09148	-1.72532	-0.901376
5A	118773114	TuG1812G0500000998.01	TuG1812G0500000998.01.T02	CA595364	90.64	203	19	0	295	497	1493	1291	1.1e-72	274	0	NA	0.82328	NA	1.18843	NA	NA	0	-1.21465	0	-0.841447	0
5A	118773114	TuG1812G0500000998.01	TuG1812G0500000998.01.T02	GR303387	97.826	230	5	0	1	230	888	1117	6.26e-110	398	0.517056	0	NA	0	0.297107	2.43622	-1.93403	NA	0	NA	-3.36579	-0.410473
5A	118773114	TuG1812G0500000998.01	TuG1812G0500000998.01.T02	TC269344	97.487	199	5	0	1	199	919	1117	1.07e-92	340	NA	0.230971	NA	0	0.594214	NA	NA	-4.32955	NA	NA	-1.68289	0
5A	118773114	TuG1812G0500000998.01	TuG1812G0500000998.01.T06	TC371981	96.916	454	14	0	1	454	713	1166	0	761	0	0	NA	0	NA	1.21811	NA	NA	0	NA	NA	-0.820945
5A	118773114	TuG1812G0500000998.01	TuG1812G0500000998.01.T01	TC441837	99.274	413	1	2	89	500	1078	1489	0	747	0.947935	0.705744	0.82328	1.07392	1.36449	1.42113	-1.05492	-1.41694	-1.21465	-0.931165	-0.732874	-0.703667
5A	118773114	TuG1812G0500000998.01	TuG1812G0500000998.01.T02	TC457691	93.532	402	13	12	1	402	444	832	1.25e-166	586	0	NA	0	1.07392	1.18843	NA	NA	NA	NA	-0.931165	-0.841447	NA
5A	118773114	TuG1812G0500000998.01	TuG1812G0500000998.01.T01	comp14144_c0_seq1	99.167	120	0	1	1	119	1370	1489	2.94e-55	215	0.631957	0.962379	0.82328	1.02723	1.1164	1.82716	-1.58239	-1.03909	-1.21465	-0.973491	-0.895734	-0.547297
5A	118773114	TuG1812G0500000998.01	TuG1812G0500000998.01.T02	comp17500_c0_seq1	99.13	115	1	0	50	164	1849	1963	3.65e-53	207	0.443191	0.43307	0.603739	0.644354	0.639923	0.696062	-2.25637	-2.30909	-1.65635	-1.55194	-1.56269	-1.43665
5A	118773114	TuG1812G0500000998.01	TuG1812G0500000998.01.T01	comp2847_c0_seq1	99.705	339	1	0	13	351	1391	1053	2.34e-177	621	0.703573	0.608033	0.899958	1.13772	1.00489	1.08658	-1.42132	-1.64465	-1.11116	-0.878951	-0.995136	-0.920323
5A	118773114	TuG1812G0500000998.01	TuG1812G0500000998.01.T02	comp5346_c0_seq1	85.538	325	37	9	1	323	1436	1120	4.15e-90	331	1.10711	0.977185	1.26475	0.834208	1.58734	1.40775	-0.903255	-1.02335	-0.790671	-1.19874	-0.629984	-0.710352
5A	118983797	TuG1812G0500001000.01	TuG1812G0500001000.01.T01	TC429783	97.217	503	11	1	1	500	544	42	0	848	1.32957	1.1176	2.92722	1.96886	3.80297	1.21811	-0.752122	-0.894774	-0.341621	-0.507908	-0.262952	-0.820945
5A	119007330	TuG1812G0500001001.01	TuG1812G0500001001.01.T01	comp13891_c0_seq1	99.512	205	0	1	13	216	911	707	1.68e-102	372	1.99436	1.51019	0.80407	0.609245	0.516437	1.12728	-0.501415	-0.662166	-1.24367	-1.64138	-1.93634	-0.887088
5A	119299249	TuG1812G0500001003.01	TuG1812G0500001003.01.T01	BF267442	95.6	500	22	0	1	500	57	556	0	802	0.517056	2.30971	NA	NA	2.37686	2.43622	-1.93403	-0.432955	0	0	-0.420724	-0.410473
5A	119299249	TuG1812G0500001003.01	TuG1812G0500001003.01.T01	TC240556	94.6	500	24	1	1	500	604	1100	0	771	1.55117	0.923884	1.09771	0.715949	0	1.21811	-0.644676	-1.08239	-0.91099	-1.39675	NA	-0.820945
5A	119299249	TuG1812G0500001003.01	TuG1812G0500001003.01.T01	TC372476	98.171	492	9	0	1	492	674	1165	0	861	2.75763	1.73228	1.09771	0.536962	0.396143	0.406036	-0.36263	-0.577273	-0.91099	-1.86233	-2.52434	-2.46284
5A	119299249	TuG1812G0500001003.01	TuG1812G0500001003.01.T01	comp6471_c0_seq1	99.012	405	3	1	1	404	769	1173	0	725	1.16111	1.28117	0.838526	0.46374	0.785212	1.53515	-0.861247	-0.780539	-1.19257	-2.15638	-1.27354	-0.651402
5A	119299249	TuG1812G0500001003.01	TuG1812G0500001003.01.T01	comp6471_c0_seq2	99.42	345	1	1	1	344	769	1113	1.85e-178	625	1.03411	0.288714	NA	0	0.237686	NA	-0.967014	-3.46364	0	NA	-4.20724	0
5A	119302950	TuG1812G0500001004.01	TuG1812G0500001004.01.T01	TC401013	96.97	429	8	2	1	424	1758	2186	0	715	0.940101	0.444175	0.509649	0.452178	0.616222	1.21811	-1.06372	-2.25137	-1.96213	-2.21152	-1.62279	-0.820945
5A	119302950	TuG1812G0500001004.01	TuG1812G0500001004.01.T01	comp18329_c0_seq1	98.276	174	2	1	1	173	1980	2153	4.91e-82	303	1.03411	0.679326	1.78377	0.884407	1.3865	0.961664	-0.967014	-1.47205	-0.560609	-1.1307	-0.721241	-1.03986
5A	119361522	TuG1812G0500001005.01	TuG1812G0500001005.01.T01	TC398685	98.8	500	3	3	1	500	672	1168	0	887	NA	0	NA	2.14785	NA	1.21811	0	NA	NA	-0.465583	0	-0.820945
5A	119361522	TuG1812G0500001005.01	TuG1812G0500001005.01.T01	comp8521_c0_seq1	99.407	337	2	0	43	379	1947	1611	1.53e-174	612	1.11031	0.911727	0.986629	0.660876	0.912406	0.868226	-0.90065	-1.09682	-1.01355	-1.51314	-1.096	-1.15177
5A	119641103	TuG1812G0500001007.01	TuG1812G0500001007.01.T01	TC390413	98.996	498	5	0	1	498	680	1177	0	893	2.36368	2.51968	0.603739	1.32175	0.633828	0.374802	-0.423069	-0.396875	-1.65635	-0.756572	-1.57771	-2.66807
5A	120623800	TuG1812G0500001010.01	TuG1812G0500001010.01.T02	TC246074	95.437	504	18	5	1	500	443	945	0	800	NA	NA	NA	2.14785	0	NA	NA	0	NA	-0.465583	NA	NA
5A	120623800	TuG1812G0500001010.01	TuG1812G0500001010.01.T01	TC246652	88.462	494	27	11	1	467	1425	1915	1.25e-161	569	NA	NA	NA	0	2.37686	1.21811	0	NA	0	NA	-0.420724	-0.820945
5A	120623800	TuG1812G0500001010.01	TuG1812G0500001010.01.T02	TC270259	90.323	527	22	11	1	500	1538	2062	0	664	NA	NA	NA	NA	2.37686	NA	0	NA	NA	NA	-0.420724	0
5A	120623800	TuG1812G0500001010.01	TuG1812G0500001010.01.T02	TC398016	98.798	499	6	0	1	499	1603	2101	0	889	NA	5.77427	2.46984	2.14785	0.950743	0.456791	0	-0.173182	-0.404885	-0.465583	-1.05181	-2.18919
5A	120623800	TuG1812G0500001010.01	TuG1812G0500001010.01.T02	TC457651	98.204	501	8	1	1	500	780	1280	0	874	0.344704	1.15485	NA	0	0.594214	0	-2.90104	-0.86591	0	NA	-1.68289	NA
5A	120623800	TuG1812G0500001010.01	TuG1812G0500001010.01.T01	comp9363_c0_seq1	93.769	321	17	3	1	320	1599	1917	1.47e-134	479	1.72707	1.38583	0.988807	0.611176	0.825645	0.937533	-0.579014	-0.721592	-1.01132	-1.63619	-1.21117	-1.06663
5A	120627329	TuG1812G0500001011.01	TuG1812G0500001011.01.T01	TC274658	95.277	487	21	2	1	487	170	654	0	771	1.03411	0.866141	1.09771	1.36681	1.03987	1.14198	-0.967014	-1.15455	-0.91099	-0.73163	-0.961654	-0.875675
5A	120627329	TuG1812G0500001011.01	TuG1812G0500001011.01.T01	TC393172	97.868	469	10	0	1	469	317	785	0	811	2.06822	2.22087	1.13691	0.644354	0.690055	1.43307	-0.483507	-0.450273	-0.879577	-1.55194	-1.44916	-0.697803
5A	120627329	TuG1812G0500001011.01	TuG1812G0500001011.01.T01	TC438860	98.496	266	4	0	1	266	396	661	1.31e-131	470	0.689408	3.46456	0.548853	0	0.594214	1.21811	-1.45052	-0.288637	-1.82198	NA	-1.68289	-0.820945
5A	120627329	TuG1812G0500001011.01	TuG1812G0500001011.01.T01	comp6570_c0_seq1	99.52	417	2	0	16	432	667	251	0	760	1.11397	1.2262	1.15507	1.02095	1.00182	0.938331	-0.897687	-0.815528	-0.865747	-0.979481	-0.998188	-1.06572
5A	120629304	TuG1812G0500001012.01	TuG1812G0500001012.01.T03	TC248006	94.048	252	12	2	4	252	461	210	2.27e-104	379	0.517056	4.61942	NA	0	0	1.21811	-1.93403	-0.216477	NA	NA	NA	-0.820945
5A	120629304	TuG1812G0500001012.01	TuG1812G0500001012.01.T01	TC392618	99.2	500	4	0	1	500	551	52	0	902	127.023	90.7005	5.62575	82.3852	61.0477	69.3039	-0.00787257	-0.0110253	-0.177754	-0.0121381	-0.0163806	-0.0144292
5A	120728051	TuG1812G0500001013.01	TuG1812G0500001013.01.T01	TC379354	96.024	503	10	5	1	500	2053	2548	0	809	0.517056	NA	NA	NA	NA	NA	-1.93403	NA	NA	NA	NA	NA
5A	120973211	TuG1812G0500001018.01	TuG1812G0500001018.01.T01	TC445458	93.204	206	10	4	291	493	1168	1372	1.82e-80	300	0.738651	1.67979	0.960493	1.4319	1.41126	1.54294	-1.35382	-0.595313	-1.04113	-0.698374	-0.708587	-0.648115
5A	121173547	TuG1812G0500001019.01	TuG1812G0500001019.01.T01	TC244144	94.933	375	19	0	1	375	438	812	3.46e-167	588	4.13645	0.769903	NA	0	1.18843	0	-0.241753	-1.29886	0	NA	-0.841447	NA
5A	121173547	TuG1812G0500001019.01	TuG1812G0500001019.01.T01	TC393498	99.476	191	1	0	1	191	622	812	6.4e-95	348	NA	4.61942	NA	5.36962	NA	8.52676	0	-0.216477	0	-0.186233	0	-0.117278
5A	121173547	TuG1812G0500001019.01	TuG1812G0500001019.01.T01	comp7264_c0_seq1	97.037	405	11	1	1	405	870	1273	0	680	0.17614	0.0621446	0.0152459	0	0.0236335	0.043349	-5.67731	-16.0915	-65.5913	NA	-42.3128	-23.0686
5A	121180075	TuG1812G0500001020.01	TuG1812G0500001020.01.T01	comp30447_c0_seq1	99.457	184	1	0	1	184	1124	1307	1.68e-91	335	2.06822	0.577427	1.09771	0.536962	0	0.609054	-0.483507	-1.73182	-0.91099	-1.86233	NA	-1.64189
5A	121182220	TuG1812G0500001021.01	TuG1812G0500001021.01.T01	TC252121	87.669	519	31	13	1	500	622	1126	9.7e-163	573	3.10233	NA	NA	4.29569	NA	NA	-0.322338	0	0	-0.232791	NA	0
5A	121182220	TuG1812G0500001021.01	TuG1812G0500001021.01.T01	TC432604	99.2	500	4	0	1	500	641	1140	0	902	3.61939	2.59842	1.23492	0.826095	1.18843	1.40551	-0.27629	-0.384849	-0.809769	-1.21052	-0.841447	-0.711486
5A	121182220	TuG1812G0500001021.01	TuG1812G0500001021.01.T01	comp36673_c0_seq1	99.462	186	1	0	1	186	789	974	1.31e-92	339	1.83842	1.04987	1.37213	1.07392	1.18843	1.31181	-0.543945	-0.952501	-0.728792	-0.931165	-0.841447	-0.762306
5A	121400164	TuG1812G0500001022.01	TuG1812G0500001022.01.T01	AL502727	96.421	475	10	7	1	474	882	414	0	776	2.06822	0.866141	0.960493	0.805442	0.198071	0.380659	-0.483507	-1.15455	-1.04113	-1.24155	-5.04868	-2.62702
5A	121400164	TuG1812G0500001022.01	TuG1812G0500001022.01.T01	BJ222560	99.52	417	1	1	84	500	537	952	0	760	2.58528	1.15485	1.64656	0.178987	0.679102	0.664423	-0.386806	-0.86591	-0.607327	-5.58699	-1.47253	-1.50507
5A	121400164	TuG1812G0500001022.01	TuG1812G0500001022.01.T01	TC370828	97.773	494	11	0	4	497	617	1110	0	852	1.8702	1.86976	1.11486	0.853963	0.607781	1.52471	-0.534702	-0.534827	-0.896975	-1.17101	-1.64533	-0.655864
5A	121400164	TuG1812G0500001022.01	TuG1812G0500001022.01.T01	TC387017	96.477	511	7	6	1	500	526	1036	0	833	NA	NA	NA	0	0.396143	0	NA	NA	0	NA	-2.52434	NA
5A	121400164	TuG1812G0500001022.01	TuG1812G0500001022.01.T01	comp1456_c0_seq1	97.783	451	6	3	1	449	1127	679	0	774	0.835532	0.680352	0.332759	0.247423	0.20839	0.445378	-1.19684	-1.46983	-3.00518	-4.04165	-4.79869	-2.24529
5A	121788982	TuG1812G0500001024.01	TuG1812G0500001024.01.T01	TC434268	100	290	0	0	1	290	336	47	1.27e-151	536	1.03411	0.577427	3.56755	0.23865	0.594214	0.913581	-0.967014	-1.73182	-0.280305	-4.19024	-1.68289	-1.09459
5A	121788982	TuG1812G0500001024.01	TuG1812G0500001024.01.T01	comp16137_c0_seq1	100	267	0	0	1	267	267	1	4.17e-139	494	1.7621	1.34056	0.919926	0.66458	0.724615	1.23741	-0.567506	-0.745957	-1.08704	-1.50471	-1.38004	-0.808138
5A	121940579	TuG1812G0500001027.01	TuG1812G0500001027.01.T01	TC258187	88.52	331	35	3	85	412	1605	1935	6.26e-110	398	NA	0	NA	2.14785	NA	NA	NA	NA	0	-0.465583	NA	NA
5A	122591079	TuG1812G0500001028.01	TuG1812G0500001028.01.T01	TC388038	97.8	500	10	1	1	500	1281	1779	0	861	0.310233	0.824896	0.548853	0	0.396143	0.304527	-3.22338	-1.21227	-1.82198	NA	-2.52434	-3.28378
5A	122591079	TuG1812G0500001028.01	TuG1812G0500001028.01.T01	comp3518_c0_seq1	99.07	430	4	0	11	440	1439	1868	0	773	1.15946	1.30941	1.00041	0.864576	0.744239	1.15063	-0.862472	-0.763704	-0.99959	-1.15664	-1.34366	-0.869087
5A	123185615	TuG1812G0500001031.01	TuG1812G0500001031.01.T06	comp33489_c0_seq1	96.575	146	3	1	1	144	328	473	2.82e-63	241	0	0	NA	NA	0.594214	NA	NA	NA	0	NA	-1.68289	NA
5A	123745351	TuG1812G0500001032.01	TuG1812G0500001032.01.T02	TC381488	97.566	493	12	0	1	493	698	1190	0	845	2.06822	2.30971	NA	0.715949	1.18843	NA	-0.483507	-0.432955	0	-1.39675	-0.841447	0
5A	123745351	TuG1812G0500001032.01	TuG1812G0500001032.01.T02	comp5126_c0_seq1	98.745	478	6	0	1	478	711	1188	0	850	1.45123	1.14119	0.95565	0.780384	0.750195	0.983292	-0.68907	-0.87628	-1.04641	-1.28142	-1.33299	-1.01699
5A	124063919	TuG1812G0500001033.01	TuG1812G0500001033.01.T01	comp18992_c0_seq1	92.308	169	4	3	2	166	1226	1389	2.01e-60	231	0.344704	1.38583	0.41164	0.429569	0	0.730865	-2.90104	-0.721592	-2.42931	-2.32791	NA	-1.36824
5A	125475412	TuG1812G0500001038.01	TuG1812G0500001038.01.T01	TC400912	97.324	411	3	4	1	411	1572	1974	0	691	2.41293	2.30971	0.431242	0.954598	1.18843	1.88253	-0.414435	-0.432955	-2.31888	-1.04756	-0.841447	-0.5312
5A	125475412	TuG1812G0500001038.01	TuG1812G0500001038.01.T01	comp14751_c0_seq1	99.078	217	2	0	3	219	1726	1942	4.64e-108	390	0.574506	1.28317	1.85238	0.904356	1.6638	0.922809	-1.74063	-0.779319	-0.539846	-1.10576	-0.601034	-1.08365
5A	125651790	TuG1812G0500001039.01	TuG1812G0500001039.01.T01	comp7232_c0_seq1	90.176	397	19	7	81	473	2306	2686	1.57e-140	499	0.310233	0	0.137213	0	0	0	-3.22338	NA	-7.28792	NA	NA	NA
5A	126433492	TuG1812G0500001042.01	TuG1812G0500001042.01.T02	TC396592	96.512	516	1	2	1	500	1657	2171	0	837	1.49372	1.78478	2.56131	0.805442	0.484175	1.57638	-0.669471	-0.560295	-0.390424	-1.24155	-2.06537	-0.634367
5A	127149936	TuG1812G0500001044.01	TuG1812G0500001044.01.T01	TC263556	92.857	266	16	3	1	264	582	846	1.75e-105	383	NA	NA	NA	1.07392	1.18843	0	NA	0	0	-0.931165	-0.841447	NA
5A	127149936	TuG1812G0500001044.01	TuG1812G0500001044.01.T01	TC384265	99.2	500	4	0	1	500	295	794	0	902	0	0	NA	2.14785	2.37686	0	NA	NA	NA	-0.465583	-0.420724	NA
5A	127149936	TuG1812G0500001044.01	TuG1812G0500001044.01.T01	comp4775_c0_seq1	95.498	311	11	2	378	685	1032	722	1.08e-138	494	1.24188	1.15894	1.0006	0.993177	0.699503	0.836966	-0.805232	-0.862861	-0.999399	-1.00687	-1.42959	-1.19479
5A	127509305	TuG1812G0500001047.01	TuG1812G0500001047.01.T01	TC376330	96.223	503	15	4	1	500	886	1387	0	822	1.55117	4.04199	NA	0.715949	5.34793	1.21811	-0.644676	-0.247403	0	-1.39675	-0.186988	-0.820945
5A	127554581	TuG1812G0500001048.01	TuG1812G0500001048.01.T01	CK161276	94.578	332	13	5	1	327	2460	2791	7.71e-144	510	1.12812	1.51019	0.509649	0.488147	0.432156	1.1369	-0.886429	-0.662166	-1.96213	-2.04856	-2.31398	-0.879584
5A	127554581	TuG1812G0500001048.01	TuG1812G0500001048.01.T01	TC383521	97.222	288	5	3	1	286	2505	2791	1.3e-136	486	1.94656	2.30971	0.93305	0.773225	0.632143	2.67984	-0.513726	-0.432955	-1.07175	-1.29329	-1.58192	-0.373157
5A	127554581	TuG1812G0500001048.01	TuG1812G0500001048.01.T01	comp5353_c0_seq1	97.417	271	6	1	1	271	2542	2811	4.31e-129	460	1.41791	1.35059	0.603061	0.487586	0.566576	0.792737	-0.705266	-0.740416	-1.65821	-2.05092	-1.76499	-1.26145
5A	127594847	TuG1812G0500001049.01	TuG1812G0500001049.01.T03	TC402138	99.4	500	3	0	1	500	198	697	0	907	0.642402	0.724855	0.969641	0.705721	1.10813	0.883557	-1.55666	-1.37959	-1.03131	-1.41699	-0.902422	-1.13179
5A	128068348	TuG1812G0500001051.01	TuG1812G0500001051.01.T01	comp37980_c0_seq1	96.324	136	5	0	1	136	1151	1286	2.65e-58	224	0.689408	NA	NA	1.4319	0.891321	1.21811	-1.45052	0	0	-0.698374	-1.12193	-0.820945
5A	128289182	TuG1812G0500001052.01	TuG1812G0500001052.01.T01	CD928278	98.394	498	8	0	1	498	1618	1121	0	876	2.06822	0.384951	NA	NA	0	0.243622	-0.483507	-2.59773	0	0	NA	-4.10473
5A	128289182	TuG1812G0500001052.01	TuG1812G0500001052.01.T01	comp22868_c0_seq1	95.413	109	5	0	1	109	979	871	2.08e-43	174	0.517056	0	NA	1.07392	5.94214	0.609054	-1.93403	NA	0	-0.931165	-0.168289	-1.64189
5A	128301562	TuG1812G0500001053.01	TuG1812G0500001053.01.T01	TC380085	94.278	367	17	4	1	364	3895	4260	2.72e-158	558	2.06822	NA	NA	NA	NA	NA	-0.483507	0	NA	0	0	NA
5A	128301562	TuG1812G0500001053.01	TuG1812G0500001053.01.T01	TC392215	97.087	309	7	1	1	307	3746	4054	1.28e-146	520	1.03411	0.577427	0.274427	0	3.56529	0	-0.967014	-1.73182	-3.64396	NA	-0.280482	NA
5A	128301562	TuG1812G0500001053.01	TuG1812G0500001053.01.T01	comp5173_c0_seq1	97.514	362	2	3	59	415	4262	3903	1.69e-174	612	0.906078	0.769903	0.537419	0.553918	0.632551	0.560716	-1.10366	-1.29886	-1.86075	-1.80532	-1.5809	-1.78343
5A	128951558	TuG1812G0500001054.01	TuG1812G0500001054.01.T01	TC389402	99.398	498	3	0	1	498	496	993	0	904	1.74506	1.46282	0.457378	0.5087	0.753638	1.25871	-0.573045	-0.683613	-2.18638	-1.96579	-1.3269	-0.794463
5A	128951558	TuG1812G0500001054.01	TuG1812G0500001054.01.T01	comp8776_c0_seq1	99.296	284	2	0	14	297	940	657	3.41e-145	514	1.71884	1.63746	0.669356	0.589232	0.458681	1.28022	-0.581787	-0.610702	-1.49397	-1.69712	-2.18016	-0.781113
5A	128987726	TuG1812G0500001056.01	TuG1812G0500001056.01.T01	CD920048	95.732	164	6	1	77	239	528	365	2.38e-69	263	5.17056	4.15748	2.0582	5.90658	1.78264	2.61023	-0.193403	-0.240531	-0.485862	-0.169303	-0.560965	-0.383108
5A	129024800	TuG1812G0500001059.01	TuG1812G0500001059.01.T01	TC404968	100	500	0	0	1	500	546	1045	0	924	0.928049	0.95401	0.762296	1.0174	0.891321	0.981254	-1.07753	-1.04821	-1.31183	-0.982897	-1.12193	-1.0191
5A	129024800	TuG1812G0500001059.01	TuG1812G0500001059.01.T01	comp6669_c0_seq1	100	328	0	0	15	342	1058	731	6.52e-173	606	0.746765	0.576282	1.44226	0.901276	1.88795	1.06199	-1.33911	-1.73526	-0.693354	-1.10954	-0.529676	-0.941631
5A	129342323	TuG1812G0500001060.01	TuG1812G0500001060.01.T02	BQ904358	99.112	338	3	0	163	500	2792	2455	2.66e-173	608	0.344704	1.15485	1.64656	0	0.594214	0.913581	-2.90104	-0.86591	-0.607327	NA	-1.68289	-1.09459
5A	129342323	TuG1812G0500001060.01	TuG1812G0500001060.01.T02	CA642300	95.136	514	4	21	1	493	2733	3246	0	798	0	1.53981	0.457378	4.29569	NA	2.43622	NA	-0.649432	-2.18638	-0.232791	NA	-0.410473
5A	129342323	TuG1812G0500001060.01	TuG1812G0500001060.01.T04	DN160077	94.375	320	17	1	80	399	1245	1563	1e-137	490	1.03411	NA	NA	NA	NA	NA	-0.967014	0	0	0	0	0
5A	129342323	TuG1812G0500001060.01	TuG1812G0500001060.01.T02	TC397423	100	499	0	0	1	499	2597	3095	0	922	1.03411	0.577427	NA	1.71828	0.594214	1.21811	-0.967014	-1.73182	0	-0.581978	-1.68289	-0.820945
5A	129342323	TuG1812G0500001060.01	TuG1812G0500001060.01.T02	TC397458	96.356	494	11	5	1	491	3133	3622	0	808	1.83608	1.45288	0.887313	1.01492	0.962777	0.89908	-0.54464	-0.688287	-1.127	-0.985303	-1.03866	-1.11225
5A	129342323	TuG1812G0500001060.01	TuG1812G0500001060.01.T04	comp17031_c0_seq1	99.087	219	2	0	1	219	1387	1605	3.33e-109	394	1.27275	1.27034	2.74427	0.113045	1.24785	0.421653	-0.785699	-0.787191	-0.364396	-8.84607	-0.801378	-2.37162
5A	129342323	TuG1812G0500001060.01	TuG1812G0500001060.01.T02	comp7640_c0_seq1	99.526	211	1	0	26	236	3098	3308	2.18e-106	385	1.84463	0.973377	0.538298	0.899098	0.684857	1.12257	-0.542114	-1.02735	-1.85771	-1.11223	-1.46016	-0.890813
5A	129523870	TuG1812G0500001062.01	TuG1812G0500001062.01.T01	comp2395_c0_seq1	99.133	346	3	0	127	472	828	483	9.18e-178	623	0.855006	0.768176	1.22169	0.755995	1.76071	0.923589	-1.16958	-1.30179	-0.818538	-1.32276	-0.567954	-1.08273
5A	130689021	TuG1812G0500001063.01	TuG1812G0500001063.01.T01	TC243301	95.522	469	19	2	1	467	833	1301	0	749	0	0.577427	NA	NA	0	NA	NA	-1.73182	NA	NA	NA	NA
5A	130689021	TuG1812G0500001063.01	TuG1812G0500001063.01.T01	TC372659	99	500	5	0	1	500	844	1343	0	896	1.60862	1.95823	0.828997	1.17734	0.626774	1.49351	-0.621652	-0.510665	-1.20628	-0.849374	-1.59547	-0.669565
5A	130689021	TuG1812G0500001063.01	TuG1812G0500001063.01.T02	comp12202_c0_seq1	98.479	263	4	0	14	276	1341	1079	4.12e-130	464	2.02845	2.12011	1.05066	1.1371	1.01512	1.40972	-0.492987	-0.471675	-0.951781	-0.879434	-0.985109	-0.70936
5A	130693974	TuG1812G0500001064.01	TuG1812G0500001064.01.T02	TC248544	95.418	502	19	4	1	500	1606	2105	0	797	0.713811	0.749281	2.03399	0.974023	1.16776	1.10456	-1.40093	-1.33461	-0.491646	-1.02667	-0.85634	-0.905341
5A	130693974	TuG1812G0500001064.01	TuG1812G0500001064.01.T01	TC377970	99.2	500	2	2	1	500	425	922	0	900	0.344704	0.577427	0.548853	0.859138	1.06959	0.761318	-2.90104	-1.73182	-1.82198	-1.16396	-0.934942	-1.31351
5A	130693974	TuG1812G0500001064.01	TuG1812G0500001064.01.T02	TC382296	99.763	422	1	0	1	422	1639	2060	0	774	0.387792	0.808398	2.46984	1.4319	0.742768	0.812072	-2.5787	-1.23701	-0.404885	-0.698374	-1.34632	-1.23142
5A	130693974	TuG1812G0500001064.01	TuG1812G0500001064.01.T01	TC427891	99.2	500	3	1	1	500	2915	3413	0	900	0.775583	1.79644	1.78377	0.715949	1.86753	1.94897	-1.28935	-0.556656	-0.560609	-1.39675	-0.535467	-0.513091
5A	130693974	TuG1812G0500001064.01	TuG1812G0500001064.01.T02	TC454224	98.06	464	5	1	6	469	1742	2201	0	804	0.775583	0.7919	1.18918	2.36263	1.04582	0.959722	-1.28935	-1.26279	-0.840914	-0.423257	-0.95619	-1.04197
5A	130693974	TuG1812G0500001064.01	TuG1812G0500001064.01.T02	comp13088_c0_seq1	99.259	135	1	0	1	135	2067	2201	2.66e-64	244	0.775583	0.557516	3.56755	1.93306	1.2651	1.48291	-1.28935	-1.79367	-0.280305	-0.517314	-0.790451	-0.674348
5A	130693974	TuG1812G0500001064.01	TuG1812G0500001064.01.T01	comp25328_c0_seq1	98.802	167	2	0	1	167	809	975	2.01e-80	298	3.10233	0.384951	0.731804	2.14785	1.05638	1.82716	-0.322338	-2.59773	-1.36649	-0.465583	-0.946628	-0.547297
5A	130693974	TuG1812G0500001064.01	TuG1812G0500001064.01.T01	comp2875_c0_seq1	98.928	373	3	1	16	388	3403	3032	0	665	0.700156	0.700763	1.13394	0.606042	1.15545	0.875447	-1.42825	-1.42702	-0.881883	-1.65005	-0.865465	-1.14227
5A	130693974	TuG1812G0500001064.01	TuG1812G0500001064.01.T02	comp7566_c0_seq1	99.654	289	1	0	15	303	2090	1802	1.3e-149	529	0.668542	0.709007	1.47968	1.0662	1.2508	1.19581	-1.49579	-1.41042	-0.675822	-0.937913	-0.799485	-0.836254
5A	130699131	TuG1812G0500001065.01	TuG1812G0500001065.01.T03	CK165254	89.49	314	26	7	1	314	290	596	1.05e-107	390	NA	NA	0.274427	0	0	NA	NA	NA	-3.64396	NA	NA	NA
5A	130699131	TuG1812G0500001065.01	TuG1812G0500001065.01.T03	TC248088	96.774	372	12	0	1	372	187	558	3.41e-177	621	NA	NA	NA	2.14785	1.18843	0	NA	NA	NA	-0.465583	-0.841447	NA
5A	130699131	TuG1812G0500001065.01	TuG1812G0500001065.01.T02	TC368984	89.344	488	33	18	3	480	766	1244	2.07e-169	595	1.94656	1.15485	0.397919	0.828993	0.470887	1.51213	-0.513726	-0.86591	-2.51308	-1.20628	-2.12365	-0.661317
5A	130699131	TuG1812G0500001065.01	TuG1812G0500001065.01.T02	comp4945_c0_seq1	99.543	219	1	0	122	340	1276	1058	1.3e-110	399	1.52869	1.44201	0.346943	0.679196	0.388612	1.04536	-0.654156	-0.693478	-2.88231	-1.47233	-2.57326	-0.95661
5A	131143427	TuG1812G0500001069.01	TuG1812G0500001069.01.T01	comp20510_c0_seq1	90.291	412	27	5	1	404	3147	2741	6.11e-149	527	1.43185	1.58792	2.01246	0.447468	0.396143	0.992533	-0.698399	-0.629753	-0.496904	-2.2348	-2.52434	-1.00752
5A	131150220	TuG1812G0500001070.01	TuG1812G0500001070.01.T01	CA627855	100	290	0	0	1	290	968	1257	7.31e-152	536	NA	NA	6.67771	30.0698	NA	81.6132	0	0	-0.149752	-0.0332559	0	-0.0122529
5A	131150220	TuG1812G0500001070.01	TuG1812G0500001070.01.T01	TC258747	91.383	499	29	5	1	494	757	1246	0	671	1.03411	NA	0.82328	NA	NA	1.21811	-0.967014	NA	-1.21465	NA	NA	-0.820945
5A	131159651	TuG1812G0500001071.01	TuG1812G0500001071.01.T01	TC266361	94.622	502	21	3	1	500	1097	1594	0	773	1.55117	1.34733	0.365902	2.14785	1.18843	1.21811	-0.644676	-0.742209	-2.73297	-0.465583	-0.841447	-0.820945
5A	131159651	TuG1812G0500001071.01	TuG1812G0500001071.01.T02	TC272980	96	500	19	1	1	500	499	997	0	811	NA	NA	NA	NA	NA	0.609054	NA	NA	NA	NA	NA	-1.64189
5A	131159651	TuG1812G0500001071.01	TuG1812G0500001071.01.T01	TC376796	98.597	499	7	0	1	499	1194	1692	0	883	1.3148	1.08556	1.64656	1.01565	0.805381	1.08724	-0.760573	-0.921181	-0.607327	-0.984593	-1.24165	-0.919763
5A	131166199	TuG1812G0500001072.01	TuG1812G0500001072.01.T01	TC254679	96.347	438	16	0	1	438	1162	1599	0	721	NA	NA	NA	NA	NA	1.21811	NA	NA	NA	NA	0	-0.820945
5A	131166199	TuG1812G0500001072.01	TuG1812G0500001072.01.T01	TC411446	98.403	501	6	2	1	499	1632	2132	0	880	NA	NA	NA	4.29569	0	NA	NA	0	NA	-0.232791	NA	NA
5A	131171262	TuG1812G0500001073.01	TuG1812G0500001073.01.T01	comp7070_c0_seq1	96.577	409	8	3	1	403	554	962	0	673	1.53334	1.11503	1.24407	0.932903	0.965598	1.13823	-0.652172	-0.896835	-0.803815	-1.07192	-1.03563	-0.878555
5A	131590229	TuG1812G0500001075.01	TuG1812G0500001075.01.T01	TC252923	93.319	479	20	5	1	467	2720	3198	0	697	1.03411	1.15485	0.731804	0	0.52819	0.609054	-0.967014	-0.86591	-1.36649	NA	-1.89326	-1.64189
5A	131590229	TuG1812G0500001075.01	TuG1812G0500001075.01.T01	TC379169	96.214	449	11	3	1	449	2759	3201	0	730	1.03411	3.46456	NA	NA	NA	0.406036	-0.967014	-0.288637	0	0	NA	-2.46284
5A	131590229	TuG1812G0500001075.01	TuG1812G0500001075.01.T02	TC451608	98.8	500	6	0	1	500	1070	1569	0	891	NA	NA	NA	NA	NA	1.21811	NA	NA	NA	NA	NA	-0.820945
5A	131596382	TuG1812G0500001076.01	TuG1812G0500001076.01.T01	TC380219	98.592	497	7	0	1	497	2408	2904	0	880	0.206822	2.30971	0.82328	0.429569	1.18843	0.487243	-4.83507	-0.432955	-1.21465	-2.32791	-0.841447	-2.05236
5A	132472180	TuG1812G0500001077.01	TuG1812G0500001077.01.T01	TC411280	96.781	497	14	1	1	497	156	650	0	828	NA	0.577427	NA	NA	0	NA	0	-1.73182	NA	NA	NA	NA
5A	132472180	TuG1812G0500001077.01	TuG1812G0500001077.01.T01	comp1900_c0_seq1	99.208	379	3	0	1	379	291	669	0	684	0.836281	0.714317	0.273041	1.04667	0.659656	0.486911	-1.19577	-1.39994	-3.66246	-0.955414	-1.51594	-2.05376
5A	132524727	TuG1812G0500001078.01	TuG1812G0500001078.01.T01	TC275368	96.364	220	8	0	1	220	235	454	2.29e-99	363	1.03411	NA	0	3.22177	0	0	-0.967014	0	NA	-0.310388	NA	NA
5A	132524727	TuG1812G0500001078.01	TuG1812G0500001078.01.T01	TC456065	99.085	437	3	1	13	449	1	436	0	784	0.477282	0.192476	0.0686067	0.23865	0.297107	0.243622	-2.0952	-5.19546	-14.5758	-4.19024	-3.36579	-4.10473
5A	132524727	TuG1812G0500001078.01	TuG1812G0500001078.01.T01	comp2471_c0_seq1	99.286	140	1	0	1	140	315	454	1.31e-66	254	0.910813	0.851893	0.294265	0.751574	0.393643	0.545668	-1.09792	-1.17386	-3.3983	-1.33054	-2.54037	-1.83262
5A	132640837	TuG1812G0500001079.01	TuG1812G0500001079.01.T01	TC449170	95.238	378	14	1	123	500	2101	2474	2.07e-169	595	0.517056	NA	NA	2.14785	1.18843	0	-1.93403	0	NA	-0.465583	-0.841447	NA
5A	132640837	TuG1812G0500001079.01	TuG1812G0500001079.01.T01	comp26109_c0_seq1	95.102	245	9	2	18	259	1870	1626	8.64e-106	383	2.06822	1.15485	1.09771	0.536962	0.891321	0.913581	-0.483507	-0.86591	-0.91099	-1.86233	-1.12193	-1.09459
5A	132640837	TuG1812G0500001079.01	TuG1812G0500001079.01.T01	comp7910_c0_seq1	94.898	196	6	2	177	370	3072	2879	1.18e-81	303	0.829694	0.798774	1.09771	0.761048	1.27581	1.00697	-1.20526	-1.25192	-0.91099	-1.31398	-0.783814	-0.993079
5A	132718640	TuG1812G0500001080.01	TuG1812G0500001080.01.T01	comp3321_c0_seq1	99.721	359	1	0	1	359	325	683	0	658	0.955429	0.638209	0.405496	0.799028	0.516378	0.578601	-1.04665	-1.56688	-2.46612	-1.25152	-1.93657	-1.72831
5A	132913602	TuG1812G0500001082.01	TuG1812G0500001082.01.T01	comp3235_c0_seq1	99	400	4	0	1	400	255	654	0	717	1.33142	1.30596	0.241561	0.88231	0.606341	0.92045	-0.751079	-0.765722	-4.13974	-1.13339	-1.64924	-1.08642
5A	132920969	TuG1812G0500001083.01	TuG1812G0500001083.01.T01	TC403982	99.601	501	1	1	1	500	916	1416	0	913	0.758348	1.15485	0.869018	0.947579	0.396143	0.802169	-1.31866	-0.86591	-1.15072	-1.05532	-2.52434	-1.24662
5A	132920969	TuG1812G0500001083.01	TuG1812G0500001083.01.T01	TC429343	95.556	495	15	4	1	493	971	1460	0	785	0	0	NA	NA	NA	1.21811	NA	NA	0	0	NA	-0.820945
5A	132920969	TuG1812G0500001083.01	TuG1812G0500001083.01.T01	comp13643_c0_seq1	99.036	415	2	2	17	429	1047	1461	0	743	1.11024	1.01212	0.72699	0.743485	0.649866	0.91473	-0.900704	-0.988025	-1.37554	-1.34502	-1.53878	-1.09322
5A	132926926	TuG1812G0500001084.01	TuG1812G0500001084.01.T02	TC390260	95.354	495	22	1	1	495	1774	2267	0	785	2.1544	1.68786	0.664401	1.00884	0.683346	1.30116	-0.464167	-0.592465	-1.50511	-0.991241	-1.46339	-0.768544
5A	133197622	TuG1812G0500001086.01	TuG1812G0500001086.01.T01	TC419436	99.8	500	1	0	1	500	1522	2021	0	918	0.658071	1.78478	1.09771	1.13045	0.731341	0.609054	-1.51959	-0.560295	-0.91099	-0.884607	-1.36735	-1.64189
5A	133200399	TuG1812G0500001087.01	TuG1812G0500001087.01.T01	TC391148	99.718	355	1	0	1	355	1282	1636	0	651	1.51475	1.44661	1.35384	1.47548	0.932459	1.6587	-0.660173	-0.691273	-0.738641	-0.677747	-1.07243	-0.602882
5A	133200399	TuG1812G0500001087.01	TuG1812G0500001087.01.T01	comp16575_c0_seq1	100	188	0	0	51	238	1449	1636	3.33e-95	348	1.08941	1.04987	0.891207	0.934166	0.8615	1.09584	-0.917927	-0.952501	-1.12207	-1.07047	-1.16077	-0.912538
5A	133204750	TuG1812G0500001089.01	TuG1812G0500001089.01.T01	TC247956	88.822	501	33	14	1	500	1951	2429	7.44e-169	593	2.06822	0	0	0	0	NA	-0.483507	NA	NA	NA	NA	0
5A	133204750	TuG1812G0500001089.01	TuG1812G0500001089.01.T01	TC377383	87.873	503	35	14	1	500	1936	2415	4.51e-161	568	NA	1.92476	NA	0.429569	0.169775	1.82716	0	-0.519546	0	-2.32791	-5.89013	-0.547297
5A	133204750	TuG1812G0500001089.01	TuG1812G0500001089.01.T01	TC385818	99	500	5	0	1	500	1872	2371	0	896	NA	NA	NA	NA	1.18843	NA	0	0	0	NA	-0.841447	0
5A	133204750	TuG1812G0500001089.01	TuG1812G0500001089.01.T01	comp12838_c0_seq1	99.043	418	4	0	37	454	2462	2045	0	750	1.3523	1.5728	0.722657	1.08035	0.69325	0.960868	-0.739481	-0.635808	-1.38378	-0.925623	-1.44248	-1.04073
5A	134104011	TuG1812G0500001093.01	TuG1812G0500001093.01.T03	TC271546	95.6	500	17	1	1	500	322	816	0	797	2.06822	5.77427	0.182951	2.14785	0	0	-0.483507	-0.173182	-5.46594	-0.465583	NA	NA
5A	134104011	TuG1812G0500001093.01	TuG1812G0500001093.01.T03	TC381124	99.391	493	1	2	1	493	334	824	0	893	1.03411	1.58792	0.480247	1.15653	1.3865	1.33992	-0.967014	-0.629753	-2.08226	-0.864654	-0.721241	-0.746314
5A	134104011	TuG1812G0500001093.01	TuG1812G0500001093.01.T01	TC385327	98.204	501	8	1	1	500	488	988	0	874	2.06822	4.61942	NA	2.14785	2.37686	NA	-0.483507	-0.216477	0	-0.465583	-0.420724	0
5A	134104011	TuG1812G0500001093.01	TuG1812G0500001093.01.T02	TC453696	98.537	410	5	1	1	410	553	961	0	723	3.61939	2.30971	1.78377	0.23865	0.792286	5.48149	-0.27629	-0.432955	-0.560609	-4.19024	-1.26217	-0.182432
5A	134104011	TuG1812G0500001093.01	TuG1812G0500001093.01.T02	comp40821_c0_seq1	99.206	126	1	0	1	126	450	575	2.13e-59	228	NA	NA	NA	NA	1.18843	0	NA	0	0	NA	-0.841447	NA
5A	135875634	TuG1812G0500001097.01	TuG1812G0500001097.01.T02	CD909690	88.119	202	23	1	195	395	441	642	3.13e-62	239	NA	0	0.274427	NA	NA	NA	0	NA	-3.64396	0	0	NA
5A	135875634	TuG1812G0500001097.01	TuG1812G0500001097.01.T02	TC373823	89.773	264	25	2	197	458	439	702	1.39e-91	337	0.517056	0.384951	0.548853	0	0.148554	0.676727	-1.93403	-2.59773	-1.82198	NA	-6.73158	-1.4777
5A	135883631	TuG1812G0500001098.01	TuG1812G0500001098.01.T06	comp17631_c0_seq1	88.174	482	18	15	85	531	2960	2483	3.77e-152	538	1.18923	0.931334	0.686067	0.666573	1.46268	1.56614	-0.840882	-1.07373	-1.45758	-1.50021	-0.683676	-0.638513
5A	136707607	TuG1812G0500001100.01	TuG1812G0500001100.01.T02	TC377133	97.6	500	12	0	1	500	371	870	0	857	3.10233	4.04199	2.46984	1.53418	0.924333	0.870077	-0.322338	-0.247403	-0.404885	-0.651816	-1.08186	-1.14932
5A	136806590	TuG1812G0500001102.01	TuG1812G0500001102.01.T01	TC269728	94.96	496	20	4	1	494	1801	2293	0	773	1.95332	2.07874	0.396394	0.894936	0.356529	0.837449	-0.511949	-0.481061	-2.52274	-1.1174	-2.80482	-1.1941
5A	136806590	TuG1812G0500001102.01	TuG1812G0500001102.01.T01	TC280464	98.39	497	8	0	1	497	1278	1774	0	874	0	2.30971	0	2.14785	NA	1.21811	NA	-0.432955	NA	-0.465583	0	-0.820945
5A	136806590	TuG1812G0500001102.01	TuG1812G0500001102.01.T01	TC404195	100	499	0	0	2	500	298	796	0	922	NA	0	NA	0	0.594214	NA	NA	NA	0	NA	-1.68289	NA
5A	136806590	TuG1812G0500001102.01	TuG1812G0500001102.01.T01	comp9048_c0_seq1	99.714	350	1	0	20	369	2293	1944	0	641	1.63578	1.36316	0.562807	0.838111	0.523931	0.987209	-0.611331	-0.733591	-1.77681	-1.19316	-1.90865	-1.01296
5A	137734399	TuG1812G0500001103.01	TuG1812G0500001103.01.T01	TC417419	98.817	338	4	0	1	338	1793	2130	1.24e-171	603	1.09678	1.24147	0.886609	0.5087	0.826733	0.643529	-0.911756	-0.805498	-1.12789	-1.96579	-1.20958	-1.55393
5A	137745384	TuG1812G0500001104.01	TuG1812G0500001104.01.T02	TC261039	98	500	10	0	1	500	949	1448	0	869	NA	1.15485	NA	NA	1.18843	NA	0	-0.86591	0	0	-0.841447	NA
5A	137745384	TuG1812G0500001104.01	TuG1812G0500001104.01.T02	TC371156	98.8	500	5	1	1	500	1199	1697	0	893	NA	NA	NA	NA	NA	1.21811	NA	NA	0	NA	0	-0.820945
5A	137745384	TuG1812G0500001104.01	TuG1812G0500001104.01.T01	TC375608	99.202	501	3	1	1	500	2400	2900	0	902	0	NA	0.82328	NA	NA	NA	NA	NA	-1.21465	NA	0	0
5A	137745384	TuG1812G0500001104.01	TuG1812G0500001104.01.T01	TC382201	93.362	467	11	7	1	461	2339	2791	0	673	4.48115	0.494938	3.01869	0.920505	1.98071	0.281102	-0.223157	-2.02046	-0.331269	-1.08636	-0.504868	-3.55743
5A	137745384	TuG1812G0500001104.01	TuG1812G0500001104.01.T01	TC413395	87.891	479	33	16	1	475	2444	2901	9.84e-153	540	0.775583	1.92476	NA	0.429569	0.950743	1.35345	-1.28935	-0.519546	0	-2.32791	-1.05181	-0.738851
5A	137873628	TuG1812G0500001105.01	TuG1812G0500001105.01.T01	comp14656_c0_seq4	90.234	256	25	0	2	257	1552	1807	2.45e-91	335	0.775583	1.15485	1.09771	0	0.594214	0.996634	-1.28935	-0.86591	-0.91099	NA	-1.68289	-1.00338
5A	138139763	TuG1812G0500001106.01	TuG1812G0500001106.01.T01	TC373705	99.202	501	3	1	1	500	562	1062	0	904	4.01479	3.7212	1.59167	4.83265	2.5089	5.37998	-0.249079	-0.268731	-0.628269	-0.206926	-0.39858	-0.185874
5A	138139763	TuG1812G0500001106.01	TuG1812G0500001106.01.T01	comp4717_c0_seq1	99.112	338	0	1	17	351	1111	774	2.51e-172	604	0.813346	0.793033	0.776503	0.455776	0.51537	0.641651	-1.22949	-1.26098	-1.28783	-2.19406	-1.94035	-1.55848
5A	140351160	TuG1812G0500001108.01	TuG1812G0500001108.01.T03	TC396560	93.681	364	17	4	1	363	2809	3167	9.84e-153	540	NA	NA	0	0	0	1.21811	0	NA	NA	NA	NA	-0.820945
5A	141040409	TuG1812G0500001109.01	TuG1812G0500001109.01.T01	TC435955	94.4	500	4	3	1	500	488	963	0	747	0.707827	0.619017	1.17767	0.880834	0.714056	0.860919	-1.41277	-1.61546	-0.849133	-1.13529	-1.40045	-1.16155
5A	141040409	TuG1812G0500001109.01	TuG1812G0500001109.01.T01	comp22971_c0_seq1	97.024	168	5	0	1	168	509	676	5.55e-76	283	0.517056	0.962379	0.960493	0.536962	0.509326	1.21811	-1.93403	-1.03909	-1.04113	-1.86233	-1.96338	-0.820945
5A	141040409	TuG1812G0500001109.01	TuG1812G0500001109.01.T01	comp4724_c0_seq1	98.374	369	5	1	6	374	1045	678	0	647	0.890602	0.674221	0.899054	0.73066	0.683868	0.910081	-1.12284	-1.48319	-1.11228	-1.36863	-1.46227	-1.0988
5A	141043837	TuG1812G0500001110.01	TuG1812G0500001110.01.T01	TC371384	99	500	5	0	1	500	932	1431	0	896	0	0	0	0.429569	0.132048	0	NA	NA	NA	-2.32791	-7.57303	NA
5A	141043837	TuG1812G0500001110.01	TuG1812G0500001110.01.T01	TC424481	99.183	367	3	0	1	367	841	1207	0	662	0.689408	0.192476	NA	0.536962	NA	0.406036	-1.45052	-5.19546	0	-1.86233	0	-2.46284
5A	141043837	TuG1812G0500001110.01	TuG1812G0500001110.01.T01	comp17735_c0_seq1	99.213	254	2	0	1	254	1220	1473	1.59e-128	459	1.40105	1.23543	1.21967	1.32962	1.45853	1.80813	-0.713748	-0.809438	-0.819891	-0.752095	-0.685624	-0.553058
5A	141131927	TuG1812G0500001111.01	TuG1812G0500001111.01.T03	TC239668	95.604	364	15	1	1	363	1582	1945	1.61e-165	582	1.77738	1.60189	0.620001	0.61367	0.799488	1.21811	-0.562626	-0.624261	-1.6129	-1.62954	-1.2508	-0.820945
5A	141131927	TuG1812G0500001111.01	TuG1812G0500001111.01.T03	TC395518	96.983	464	13	1	3	465	1613	2076	0	778	1.16338	2.021	1.37213	1.07392	0.875684	1.87401	-0.859568	-0.494806	-0.728792	-0.931165	-1.14196	-0.533614
5A	141131927	TuG1812G0500001111.01	TuG1812G0500001111.01.T03	TC400561	99.315	438	3	0	1	438	1834	2271	0	793	1.8614	1.6168	0.901687	0.343655	1.32824	0.79177	-0.53723	-0.618507	-1.10903	-2.90989	-0.752874	-1.26299
5A	141131927	TuG1812G0500001111.01	TuG1812G0500001111.01.T03	TC403542	96.4	500	16	2	1	500	452	949	0	835	1.03411	0	NA	0.715949	0.396143	0.609054	-0.967014	NA	0	-1.39675	-2.52434	-1.64189
5A	141131927	TuG1812G0500001111.01	TuG1812G0500001111.01.T03	comp24060_c0_seq1	98.276	232	4	0	1	232	1843	2074	4.87e-113	407	1.41937	1.51019	0.621496	0.809573	0.475371	0.974487	-0.704539	-0.662166	-1.60902	-1.23522	-2.10362	-1.02618
5A	141131927	TuG1812G0500001111.01	TuG1812G0500001111.01.T03	comp25018_c0_seq1	100	76	0	0	1	76	2196	2271	4.74e-33	141	2.24057	2.07874	0.640329	0.536962	0.822758	2.57156	-0.446314	-0.481061	-1.5617	-1.86233	-1.21542	-0.388869
5A	142739650	TuG1812G0500001116.01	TuG1812G0500001116.01.T03	TC276798	96.393	305	10	1	194	497	1367	1671	4.64e-141	501	0.206822	0.659917	1.82951	1.17155	1.34689	0.70522	-4.83507	-1.51534	-0.546594	-0.853568	-0.742454	-1.418
5A	142739650	TuG1812G0500001116.01	TuG1812G0500001116.01.T03	TC392741	98.802	501	5	1	1	500	1440	1940	0	891	1.13106	0.617713	0.949938	0.477299	0.648234	0.870077	-0.884127	-1.61888	-1.0527	-2.09512	-1.54265	-1.14932
5A	142739650	TuG1812G0500001116.01	TuG1812G0500001116.01.T03	comp11369_c0_seq1	98.23	226	4	0	17	242	1940	1715	1.1e-109	396	0.740557	0.500964	1.04845	0.499085	0.580066	0.652558	-1.35033	-1.99615	-0.953789	-2.00367	-1.72394	-1.53243
5A	142938817	TuG1812G0500001118.01	TuG1812G0500001118.01.T01	comp5022_c0_seq1	97	300	9	0	11	310	1246	947	2.39e-142	505	0.904847	0.852393	1.28313	1.13804	1.11198	1.22587	-1.10516	-1.17317	-0.779344	-0.878705	-0.899297	-0.815749
5A	143049399	TuG1812G0500001119.01	TuG1812G0500001119.01.T02	CJ681035	100	404	0	0	1	404	479	882	0	747	2.06822	0.866141	0.548853	0.268481	0.475371	2.43622	-0.483507	-1.15455	-1.82198	-3.72466	-2.10362	-0.410473
5A	143049399	TuG1812G0500001119.01	TuG1812G0500001119.01.T01	TC402800	98.598	428	6	0	1	428	1474	1901	0	758	0.935625	1.67454	0.591073	1.35653	1.4484	0.922809	-1.0688	-0.597179	-1.69184	-0.737173	-0.690418	-1.08365
5A	144154244	TuG1812G0500001120.01	TuG1812G0500001120.01.T01	TC381731	98.093	367	6	1	1	366	476	842	0	638	0	0.577427	NA	NA	NA	NA	NA	-1.73182	NA	NA	NA	NA
5A	144626237	TuG1812G0500001121.01	TuG1812G0500001121.01.T01	TC411203	96.04	505	14	5	1	500	1604	2107	0	817	0.413645	1.15485	NA	2.14785	0.339551	2.43622	-2.41753	-0.86591	0	-0.465583	-2.94507	-0.410473
5A	144626237	TuG1812G0500001121.01	TuG1812G0500001121.01.T01	TC461038	84.067	477	74	2	1	476	340	815	2.83e-128	459	1.91615	1.51955	1.47504	0.480439	1.12419	0.571325	-0.521881	-0.658092	-0.677946	-2.08143	-0.88953	-1.75032
5A	144626237	TuG1812G0500001121.01	TuG1812G0500001121.01.T01	comp46891_c0_seq1	99.099	111	1	0	1	111	1707	1817	3.52e-51	200	1.03411	NA	NA	0	0	1.21811	-0.967014	NA	0	NA	NA	-0.820945
5A	144626237	TuG1812G0500001121.01	TuG1812G0500001121.01.T01	comp9803_c0_seq1	100	217	0	0	1	217	1817	2033	1.97e-111	401	1.59094	1.19763	1.05197	0.869366	0.867232	1.44913	-0.628559	-0.834985	-0.950599	-1.15026	-1.15309	-0.69007
5A	145370209	TuG1812G0500001122.01	TuG1812G0500001122.01.T04	TC429063	97.339	451	10	2	1	450	478	927	0	765	0.470051	0	0	0	0	0.270691	-2.12743	NA	NA	NA	NA	-3.69425
5A	145370209	TuG1812G0500001122.01	TuG1812G0500001122.01.T04	comp7606_c0_seq1	99.104	335	2	1	77	411	927	594	3.62e-171	601	1.04456	1.11636	0.837001	0.514273	0.79463	0.747017	-0.957344	-0.895769	-1.19474	-1.94449	-1.25845	-1.33866
5A	145372164	TuG1812G0500001123.01	TuG1812G0500001123.01.T01	comp22899_c0_seq1	97.143	105	3	0	1	105	538	642	4.9e-44	178	1.37882	0.742406	1.09771	2.76152	0.864312	1.52264	-0.72526	-1.34697	-0.91099	-0.36212	-1.15699	-0.656756
5A	148013015	TuG1812G0500001127.01	TuG1812G0500001127.01.T01	TC272988	94.488	508	19	7	1	500	1358	1864	0	776	1.03411	1.15485	0.82328	2.14785	1.18843	NA	-0.967014	-0.86591	-1.21465	-0.465583	-0.841447	0
5A	148013015	TuG1812G0500001127.01	TuG1812G0500001127.01.T01	TC390452	92.148	433	21	6	1	420	1475	1907	1.6e-170	599	1.03411	0.577427	NA	2.14785	1.78264	0.609054	-0.967014	-1.73182	0	-0.465583	-0.560965	-1.64189
5A	148013015	TuG1812G0500001127.01	TuG1812G0500001127.01.T01	comp6446_c0_seq1	98.921	278	3	0	17	294	1855	1578	3.4e-140	497	0.620467	0.879889	1.38984	0.615816	1.23286	1.23029	-1.61169	-1.13651	-0.719508	-1.62386	-0.811125	-0.812817
5A	149767516	TuG1812G0500001129.01	TuG1812G0500001129.01.T01	CK210451	94.757	267	11	3	2	267	1932	2196	2.24e-114	412	NA	1.15485	NA	0	1.18843	NA	0	-0.86591	NA	NA	-0.841447	0
5A	149767516	TuG1812G0500001129.01	TuG1812G0500001129.01.T02	TC280967	95.4	500	22	1	1	500	611	1109	0	795	NA	NA	NA	NA	0.594214	NA	NA	NA	NA	0	-1.68289	NA
5A	149767516	TuG1812G0500001129.01	TuG1812G0500001129.01.T01	comp894_c0_seq1	98.873	355	3	1	1	355	1843	2196	1.39e-180	632	0.868173	0.792731	0.954119	0.958199	0.870856	0.966311	-1.15184	-1.26146	-1.04809	-1.04362	-1.1483	-1.03486
5A	151341204	TuG1812G0500001131.01	TuG1812G0500001131.01.T01	TC372486	97.2	500	13	1	1	500	1609	2107	0	845	1.24093	0.461942	1.09771	0	1.98071	0.270691	-0.805845	-2.16477	-0.91099	NA	-0.504868	-3.69425
5A	151341204	TuG1812G0500001131.01	TuG1812G0500001131.01.T01	TC395016	93.281	506	22	12	1	500	1196	1695	0	737	0	1.15485	NA	0	NA	NA	NA	-0.86591	NA	NA	NA	0
5A	151341204	TuG1812G0500001131.01	TuG1812G0500001131.01.T01	comp2214_c0_seq1	99.54	435	2	0	2	436	1688	2122	0	793	0.951489	0.803122	1.17827	0.697418	1.50117	0.799768	-1.05098	-1.24514	-0.8487	-1.43386	-0.666146	-1.25036
5A	151909869	TuG1812G0500001132.01	TuG1812G0500001132.01.T01	TC391489	96.2	500	16	2	1	500	395	891	0	815	0.947935	1.01487	0.622034	0.859138	1.61287	1.11934	-1.05492	-0.985346	-1.60763	-1.16396	-0.620014	-0.893382
5A	151909869	TuG1812G0500001132.01	TuG1812G0500001132.01.T02	TC418357	95.316	427	18	1	1	427	173	597	0	676	NA	5.77427	0	0	0.594214	1.21811	0	-0.173182	NA	NA	-1.68289	-0.820945
5A	151909869	TuG1812G0500001132.01	TuG1812G0500001132.01.T01	comp9436_c0_seq1	98.674	377	4	1	27	402	934	558	0	667	1.97421	0.91709	1.01639	0.926522	1.20449	1.55846	-0.506531	-1.09041	-0.98387	-1.07931	-0.830228	-0.641658
5A	152149688	TuG1812G0500001134.01	TuG1812G0500001134.01.T01	TC379168	98.8	500	6	0	1	500	2359	2858	0	891	1.70324	0.664916	0.975739	0.838184	0.792286	1.1311	-0.587116	-1.50395	-1.02486	-1.19306	-1.26217	-0.884095
5A	152149688	TuG1812G0500001134.01	TuG1812G0500001134.01.T02	TC414969	97.892	427	9	0	1	427	2256	2682	0	739	0.689408	0.692913	1.37213	0	NA	2.43622	-1.45052	-1.44318	-0.728792	NA	NA	-0.410473
5A	152461502	TuG1812G0500001135.01	TuG1812G0500001135.01.T01	TC245367	90.652	353	32	1	122	473	1510	1862	4.71e-131	468	NA	NA	NA	NA	1.18843	NA	NA	NA	NA	NA	-0.841447	NA
5A	152461502	TuG1812G0500001135.01	TuG1812G0500001135.01.T01	comp4488_c0_seq1	99.286	420	3	0	1	420	1544	1963	0	760	1.49577	1.11336	0.962373	0.833962	0.87186	1.30023	-0.668553	-0.89818	-1.0391	-1.1991	-1.14697	-0.769096
5A	153236990	TuG1812G0500001138.01	TuG1812G0500001138.01.T01	TC369669	100	232	0	0	1	232	673	904	2.22e-119	429	0.823784	1.15485	0.942596	0.588101	1.18843	0.792504	-1.21391	-0.86591	-1.0609	-1.70039	-0.841447	-1.26182
5A	153236990	TuG1812G0500001138.01	TuG1812G0500001138.01.T01	TC381621	83.636	275	43	2	1	274	627	900	1.11e-67	257	1.8614	1.53981	0.82328	1.25291	0.198071	1.05569	-0.53723	-0.649432	-1.21465	-0.798142	-5.04868	-0.947244
5A	153236990	TuG1812G0500001138.01	TuG1812G0500001138.01.T01	comp13316_c0_seq1	100	50	0	0	220	269	903	952	1.7e-18	93.5	1.11853	0.879264	1.42702	0.668743	1.03987	0.961919	-0.894032	-1.13731	-0.700762	-1.49534	-0.961654	-1.03959
5A	153470848	TuG1812G0500001139.01	TuG1812G0500001139.01.T01	CA661144	97.761	402	7	2	1	400	817	416	0	702	NA	NA	NA	NA	1.18843	NA	NA	NA	NA	NA	-0.841447	0
5A	153470848	TuG1812G0500001139.01	TuG1812G0500001139.01.T01	TC243171	91.781	292	17	3	1	288	457	745	1.74e-110	399	NA	NA	0	NA	1.18843	NA	NA	NA	NA	0	-0.841447	0
5A	153470848	TuG1812G0500001139.01	TuG1812G0500001139.01.T01	TC253112	92.277	505	27	6	1	498	296	795	0	706	0.641677	0.992241	1.29373	1.24642	1.08984	0.932714	-1.55842	-1.00782	-0.772962	-0.802299	-0.91757	-1.07214
5A	153470848	TuG1812G0500001139.01	TuG1812G0500001139.01.T01	TC256034	90.094	212	14	3	1	208	544	752	5.13e-71	268	0.689408	1.15485	NA	1.71828	0.990357	1.21811	-1.45052	-0.86591	0	-0.581978	-1.00974	-0.820945
5A	153470848	TuG1812G0500001139.01	TuG1812G0500001139.01.T01	TC374014	99.2	500	4	0	1	500	372	871	0	904	1.03411	NA	0.548853	0	NA	NA	-0.967014	0	-1.82198	NA	0	NA
5A	153470848	TuG1812G0500001139.01	TuG1812G0500001139.01.T01	comp22438_c0_seq1	99.088	329	3	0	15	343	54	382	1.79e-168	592	0.932157	0.529967	0.532221	1.20947	1.24556	1.10935	-1.07278	-1.88691	-1.87892	-0.826811	-0.802849	-0.90143
5A	153470848	TuG1812G0500001139.01	TuG1812G0500001139.01.T01	comp339_c0_seq1	99.811	529	1	0	32	560	914	386	0	972	0.677866	0.907467	1.33908	1.13523	1.05198	0.942184	-1.47522	-1.10197	-0.746779	-0.880878	-0.95059	-1.06136
5A	154876846	TuG1812G0500001142.01	TuG1812G0500001142.01.T05	CN010872	87.097	93	9	2	84	173	1356	1448	5.5e-21	102	0.14773	1.38583	1.64656	0.357974	1.78264	0.812072	-6.7691	-0.721592	-0.607327	-2.7935	-0.560965	-1.23142
5A	155296320	TuG1812G0500001144.01	TuG1812G0500001144.01.T01	TC384317	98.41	503	5	2	1	500	1341	1843	0	881	NA	0	0.548853	NA	NA	1.21811	0	NA	-1.82198	0	0	-0.820945
5A	155296320	TuG1812G0500001144.01	TuG1812G0500001144.01.T01	comp2288_c0_seq1	98.523	474	7	0	1	474	1423	1896	0	837	0.94577	0.66357	2.0386	1.68411	4.82908	0.721613	-1.05734	-1.507	-0.490533	-0.593787	-0.207079	-1.38578
5A	155811156	TuG1812G0500001145.01	TuG1812G0500001145.01.T05	comp14484_c0_seq1	98.165	218	4	0	400	617	1046	829	9.28e-105	381	0.443191	0.486255	0.713509	0.488147	0.220079	0.669959	-2.25637	-2.05654	-1.40152	-2.04856	-4.54382	-1.49263
5A	155811156	TuG1812G0500001145.01	TuG1812G0500001145.01.T02	comp30384_c0_seq1	98.438	192	3	0	1	192	1511	1702	1.36e-92	339	0.344704	0	0	0	0	0	-2.90104	NA	NA	NA	NA	NA
5A	155811156	TuG1812G0500001145.01	TuG1812G0500001145.01.T05	comp32554_c0_seq1	97.959	49	1	0	1	49	679	727	3.45e-16	86.1	0.827289	1.15485	0.0686067	0	0.950743	0.174015	-1.20877	-0.86591	-14.5758	NA	-1.05181	-5.74662
5A	155814591	TuG1812G0500001146.01	TuG1812G0500001146.01.T01	CD902938	100	309	0	0	1	309	557	865	3.49e-162	571	NA	NA	NA	NA	1.18843	NA	NA	NA	NA	NA	-0.841447	NA
5A	155814591	TuG1812G0500001146.01	TuG1812G0500001146.01.T02	CD902939	97.41	502	11	1	1	500	1572	1071	0	854	2.84381	1.81477	2.83574	2.3865	1.6638	1.62414	-0.351641	-0.551034	-0.352641	-0.419024	-0.601034	-0.615709
5A	155814591	TuG1812G0500001146.01	TuG1812G0500001146.01.T01	comp14484_c0_seq2	96.907	291	7	1	1	289	1790	2080	1.42e-136	486	0.14773	0.384951	0.914755	1.15653	1.18843	0.281102	-6.7691	-2.59773	-1.09319	-0.864654	-0.841447	-3.55743
5A	155814591	TuG1812G0500001146.01	TuG1812G0500001146.01.T02	comp28988_c0_seq1	99.275	138	0	1	1	137	1367	1504	1.59e-65	248	1.55117	1.73228	NA	NA	NA	1.82716	-0.644676	-0.577273	0	0	0	-0.547297
5A	156230215	TuG1812G0500001147.01	TuG1812G0500001147.01.T01	TC408373	99.205	503	1	1	1	500	657	1159	0	904	2.80687	1.45426	0.572716	0.605803	0.611192	0.819455	-0.356268	-0.687634	-1.74606	-1.6507	-1.63615	-1.22032
5A	156230215	TuG1812G0500001147.01	TuG1812G0500001147.01.T03	comp492_c0_seq1	100	244	0	0	32	275	908	1151	2.66e-126	451	1.35078	1.31414	0.819264	0.724178	0.611965	0.974487	-0.740315	-0.760951	-1.22061	-1.38088	-1.63408	-1.02618
5A	156238734	TuG1812G0500001149.01	TuG1812G0500001149.01.T01	TC246633	91.765	340	20	5	1	335	1052	1388	1.69e-130	466	0.775583	1.0105	1.92099	1.81741	0.972351	0.730865	-1.28935	-0.989611	-0.520566	-0.550234	-1.02844	-1.36824
5A	156238734	TuG1812G0500001149.01	TuG1812G0500001149.01.T01	TC426043	97.847	511	0	1	1	500	901	1411	0	872	1.58564	1.38583	1.64656	1.9092	1.02997	0.885897	-0.630661	-0.721592	-0.607327	-0.523781	-0.970901	-1.1288
5A	156238734	TuG1812G0500001149.01	TuG1812G0500001149.01.T01	TC436772	97	500	10	3	1	498	899	1395	0	835	2.24057	0.846893	1.64656	0.767088	1.33698	1.88253	-0.446314	-1.18079	-0.607327	-1.30363	-0.747953	-0.5312
5A	156436484	TuG1812G0500001150.01	TuG1812G0500001150.01.T02	comp15985_c0_seq1	98.03	203	3	1	1	203	367	568	3.29e-96	351	0.861759	0.944881	1.81122	0.715949	2.2283	1.92333	-1.16042	-1.05833	-0.552115	-1.39675	-0.448772	-0.519932
5A	157300356	TuG1812G0500001151.01	TuG1812G0500001151.01.T01	TC409646	99.155	355	2	1	1	354	3105	3459	0	638	0.103411	0	1.64656	0.536962	1.48554	0.609054	-9.67014	NA	-0.607327	-1.86233	-0.673158	-1.64189
5A	158426798	TuG1812G0500001156.01	TuG1812G0500001156.01.T03	TC402407	98.428	318	5	0	1	318	1987	2304	7.55e-159	560	NA	NA	0.82328	0	NA	NA	0	NA	-1.21465	NA	0	NA
5A	158426798	TuG1812G0500001156.01	TuG1812G0500001156.01.T02	comp35618_c0_seq1	100	170	0	0	1	170	1920	2089	2e-85	315	NA	0.577427	NA	0	0.594214	2.43622	0	-1.73182	0	NA	-1.68289	-0.410473
5A	158441960	TuG1812G0500001158.01	TuG1812G0500001158.01.T01	TC395274	98.291	234	4	0	132	365	268	35	8.05e-114	411	0	3.46456	1.64656	6.44354	2.37686	2.43622	NA	-0.288637	-0.607327	-0.155194	-0.420724	-0.410473
5A	161438410	TuG1812G0500001162.01	TuG1812G0500001162.01.T01	TC411074	96.286	350	11	1	153	500	232	581	9.7e-163	573	NA	5.77427	0.274427	6.44354	NA	NA	NA	-0.173182	-3.64396	-0.155194	0	0
5A	161438410	TuG1812G0500001162.01	TuG1812G0500001162.01.T01	TC429829	96.845	317	8	1	157	471	232	548	5.56e-150	531	13.4434	3.46456	5.07689	10.7392	8.71514	3.30629	-0.0743857	-0.288637	-0.196971	-0.0931165	-0.114743	-0.302453
5A	161438410	TuG1812G0500001162.01	TuG1812G0500001162.01.T01	comp7626_c0_seq1	96.175	366	11	3	16	380	595	232	1.57e-169	595	1.03411	0.743355	3.1216	1.30172	3.73034	1.65743	-0.967014	-1.34525	-0.320348	-0.768211	-0.268072	-0.603345
5A	161478778	TuG1812G0500001163.01	TuG1812G0500001163.01.T01	CD869527	98.204	501	6	3	1	499	383	882	0	876	0.443191	0.494938	1.09771	0	0.792286	1.21811	-2.25637	-2.02046	-0.91099	NA	-1.26217	-0.820945
5A	161478778	TuG1812G0500001163.01	TuG1812G0500001163.01.T01	TC252395	95.58	362	16	0	1	362	368	729	5.8e-165	580	1.37882	2.11723	0.457378	1.07392	0.445661	1.21811	-0.72526	-0.472315	-2.18638	-0.931165	-2.24386	-0.820945
5A	161478778	TuG1812G0500001163.01	TuG1812G0500001163.01.T01	TC420642	98.19	221	4	0	185	405	509	729	1.36e-106	387	NA	0	NA	0.715949	1.18843	0	0	NA	0	-1.39675	-0.841447	NA
5A	161478778	TuG1812G0500001163.01	TuG1812G0500001163.01.T01	comp8383_c0_seq1	99.383	162	1	0	238	399	729	568	6.66e-79	294	1.18253	1.04163	1.03708	0.843565	0.748409	1.03636	-0.845648	-0.960031	-0.964248	-1.18545	-1.33617	-0.964917
5A	162239498	TuG1812G0500001164.01	TuG1812G0500001164.01.T03	comp33174_c0_seq1	98.476	328	5	0	15	342	340	13	1.39e-164	579	3.51598	3.07961	0.72037	1.48697	0.639923	1.34633	-0.284416	-0.324716	-1.38818	-0.672508	-1.56269	-0.74276
5A	162483982	TuG1812G0500001165.01	TuG1812G0500001165.01.T01	TC404326	95.276	508	16	1	1	500	545	1052	0	798	1.03411	1.15485	0.960493	0	0.891321	1.21811	-0.967014	-0.86591	-1.04113	NA	-1.12193	-0.820945
5A	162483982	TuG1812G0500001165.01	TuG1812G0500001165.01.T01	TC428375	96.208	501	16	3	1	500	605	1103	0	817	0.517056	1.15485	NA	0.536962	0.792286	2.43622	-1.93403	-0.86591	0	-1.86233	-1.26217	-0.410473
5A	163020011	TuG1812G0500001167.01	TuG1812G0500001167.01.T01	TC435286	98.41	503	4	3	1	500	1671	2172	0	883	0	1.53981	NA	1.07392	1.18843	3.04527	NA	-0.649432	0	-0.931165	-0.841447	-0.328378
5A	163020011	TuG1812G0500001167.01	TuG1812G0500001167.01.T01	comp5982_c0_seq1	98.477	394	5	1	1	394	2281	1889	0	693	1.45013	1.17112	1.01538	0.640087	0.901225	0.795499	-0.689592	-0.853883	-0.984854	-1.56229	-1.1096	-1.25707
5A	163830715	TuG1812G0500001169.01	TuG1812G0500001169.01.T01	TC280601	91.239	331	21	3	1	326	1081	1408	6.87e-124	444	2.58528	1.24369	1.78377	3.57974	1.18843	6.09054	-0.386806	-0.804059	-0.560609	-0.27935	-0.841447	-0.164189
5A	163830715	TuG1812G0500001169.01	TuG1812G0500001169.01.T01	TC426446	99.799	498	1	0	1	498	1116	1613	0	915	2.60596	2.35095	1.12265	1.09727	1.01366	1.6749	-0.383736	-0.425359	-0.890746	-0.911353	-0.986525	-0.597051
5A	163830715	TuG1812G0500001169.01	TuG1812G0500001169.01.T01	TC432682	95.868	484	16	1	3	482	1096	1579	0	780	1.62503	1.50131	0.878165	0.572759	0.908798	2.43622	-0.615372	-0.666085	-1.13874	-1.74594	-1.10035	-0.410473
5A	163830715	TuG1812G0500001169.01	TuG1812G0500001169.01.T01	comp2219_c0_seq1	98.571	140	2	0	43	182	1251	1390	5.61e-65	248	2.23551	1.978	1.25819	1.2853	1.09882	2.09636	-0.447326	-0.505562	-0.794793	-0.778029	-0.91007	-0.477018
5A	163844685	TuG1812G0500001170.01	TuG1812G0500001170.01.T01	TC249054	95.628	366	12	2	1	365	1559	1921	4.48e-166	584	0.567325	0.512881	1.23863	0.909925	1.2209	0.574392	-1.76266	-1.94977	-0.807345	-1.09899	-0.819068	-1.74097
5A	163844685	TuG1812G0500001170.01	TuG1812G0500001170.01.T01	TC389800	97.192	463	7	3	1	457	1594	2056	0	778	1.08112	0.753166	2.46984	2.30126	2.27782	1.21811	-0.92497	-1.32773	-0.404885	-0.434544	-0.439016	-0.820945
5A	163844685	TuG1812G0500001170.01	TuG1812G0500001170.01.T01	comp381_c0_seq1	99.376	481	0	1	1	481	1658	2135	0	869	0.573563	0.447475	1.00676	0.857045	1.19151	0.517685	-1.74349	-2.23476	-0.993283	-1.1668	-0.83927	-1.93168
5A	164519942	TuG1812G0500001171.01	TuG1812G0500001171.01.T01	TC393922	99.6	500	1	1	1	500	1988	2486	0	911	1.55117	0.769903	0.274427	0.859138	0.52819	0.406036	-0.644676	-1.29886	-3.64396	-1.16396	-1.89326	-2.46284
5A	165158153	TuG1812G0500001172.01	TuG1812G0500001172.01.T01	TC252615	92.585	499	25	4	1	499	2518	3004	0	706	1.03411	0.346456	4.66525	0.805442	0.924333	1.06584	-0.967014	-2.88637	-0.214351	-1.24155	-1.08186	-0.938223
5A	165158153	TuG1812G0500001172.01	TuG1812G0500001172.01.T01	TC279492	97.4	500	13	0	1	500	1017	1516	0	852	1.03411	NA	NA	NA	NA	NA	-0.967014	NA	0	NA	NA	NA
5A	165158153	TuG1812G0500001172.01	TuG1812G0500001172.01.T01	TC445819	100	499	0	0	1	499	2466	2964	0	922	0.775583	1.58792	1.12999	0.686118	0.700033	1.04757	-1.28935	-0.629753	-0.884962	-1.45748	-1.4285	-0.954587
5A	165158153	TuG1812G0500001172.01	TuG1812G0500001172.01.T01	comp18090_c0_seq1	99.342	152	1	0	1	152	2871	3022	9.36e-74	276	1.55117	0	NA	0.536962	2.97107	0	-0.644676	NA	0	-1.86233	-0.336579	NA
5A	165158153	TuG1812G0500001172.01	TuG1812G0500001172.01.T01	comp18090_c0_seq2	99.281	139	1	0	1	139	2871	3009	1.4e-66	252	1.03411	NA	NA	0	0.594214	1.21811	-0.967014	0	0	NA	-1.68289	-0.820945
5A	165537825	TuG1812G0500001174.01	TuG1812G0500001174.01.T01	comp20958_c0_seq1	98.784	329	4	0	1	329	889	1217	8.47e-167	586	1.09874	0.692913	1.25017	0.399599	0.174769	1.01509	-0.910131	-1.44318	-0.799894	-2.50251	-5.72184	-0.985134
5A	165560817	TuG1812G0500001175.01	TuG1812G0500001175.01.T01	comp1186_c0_seq1	99.841	630	0	1	1	629	1769	2398	0	1157	0.953915	0.956053	0.756154	1.05605	0.822103	1.04527	-1.04831	-1.04597	-1.32248	-0.946927	-1.21639	-0.956692
5A	166136543	TuG1812G0500001176.01	TuG1812G0500001176.01.T01	TC250231	85.545	505	47	11	1	482	1509	2010	3.59e-142	505	NA	NA	NA	2.14785	0	NA	0	0	0	-0.465583	NA	0
5A	166136543	TuG1812G0500001176.01	TuG1812G0500001176.01.T05	TC379531	96.62	503	11	4	1	500	1215	1714	0	830	NA	0	NA	NA	1.18843	0	NA	NA	NA	0	-0.841447	NA
5A	166136543	TuG1812G0500001176.01	TuG1812G0500001176.01.T02	TC420065	99.4	500	3	0	1	500	343	842	0	907	NA	NA	NA	2.14785	NA	1.21811	NA	0	0	-0.465583	NA	-0.820945
5A	166136543	TuG1812G0500001176.01	TuG1812G0500001176.01.T01	comp4955_c0_seq1	98.128	374	3	2	7	380	2029	1660	0	649	1.26063	1.08642	1.18918	0.998458	1.01865	1.00854	-0.793254	-0.920455	-0.840914	-1.00154	-0.981689	-0.991531
5A	166887300	TuG1812G0500001177.01	TuG1812G0500001177.01.T01	TC440736	98.054	257	5	0	14	270	257	1	4.02e-125	448	NA	0	NA	0	1.18843	NA	NA	NA	0	NA	-0.841447	0
5A	166964550	TuG1812G0500001179.01	TuG1812G0500001179.01.T01	TC389138	99.6	500	2	0	1	500	1152	1651	0	913	4.13645	4.61942	NA	0.306835	0.792286	1.52264	-0.241753	-0.216477	0	-3.25908	-1.26217	-0.656756
5A	167788181	TuG1812G0500001182.01	TuG1812G0500001182.01.T01	TC260012	93.097	507	27	4	1	500	1210	1715	0	736	0	NA	NA	2.14785	NA	NA	NA	0	0	-0.465583	0	0
5A	167788181	TuG1812G0500001182.01	TuG1812G0500001182.01.T01	TC379128	95.783	498	21	0	1	498	1187	1684	0	804	1.31614	2.16535	1.09771	1.25291	1.23795	1.86777	-0.759797	-0.461819	-0.91099	-0.798142	-0.80779	-0.535399
5A	167788181	TuG1812G0500001182.01	TuG1812G0500001182.01.T01	comp26272_c0_seq1	99.371	159	1	0	7	165	1557	1715	1.28e-77	289	1.84663	3.46456	1.25017	2.31307	1.44678	1.39212	-0.541528	-0.288637	-0.799894	-0.432327	-0.691189	-0.718327
5A	167792881	TuG1812G0500001183.01	TuG1812G0500001183.01.T01	TC370824	96.6	500	17	0	1	500	796	1295	0	830	1.03411	0.577427	NA	NA	0.594214	1.21811	-0.967014	-1.73182	NA	NA	-1.68289	-0.820945
5A	167792881	TuG1812G0500001183.01	TuG1812G0500001183.01.T02	TC377558	100	500	0	0	1	500	282	781	0	924	0.329035	0.303909	0.82328	0.511392	0.621224	0.406036	-3.03919	-3.29046	-1.21465	-1.95545	-1.60973	-2.46284
5A	167834793	TuG1812G0500001184.01	TuG1812G0500001184.01.T01	TC409929	96.842	380	10	2	1	380	301	678	0	634	1.03411	0	NA	0	0	NA	-0.967014	NA	0	NA	NA	NA
5A	167834793	TuG1812G0500001184.01	TuG1812G0500001184.01.T01	comp9801_c0_seq1	98.765	162	1	1	1	162	518	678	8.22e-77	287	1.67283	1.36169	1.3573	0.324884	0.617365	1.56003	-0.59779	-0.734379	-0.736757	-3.07802	-1.61979	-0.641012
5A	168302572	TuG1812G0500001185.01	TuG1812G0500001185.01.T01	TC407646	98.4	500	6	2	1	500	343	840	0	878	2.06822	1.02654	1.92099	0.536962	0.756273	0.852676	-0.483507	-0.974149	-0.520566	-1.86233	-1.32227	-1.17278
5A	169633160	TuG1812G0500001188.01	TuG1812G0500001188.01.T01	CK151727	99.309	434	2	1	25	457	664	231	0	785	1.03411	1.15485	0	NA	NA	0	-0.967014	-0.86591	NA	NA	0	NA
5A	169633160	TuG1812G0500001188.01	TuG1812G0500001188.01.T01	CK217663	99.701	334	1	0	1	334	349	682	2.06e-174	612	NA	NA	NA	1.07392	1.78264	0	0	0	0	-0.931165	-0.560965	NA
5A	169633160	TuG1812G0500001188.01	TuG1812G0500001188.01.T05	TC416530	96.729	428	9	2	6	428	229	656	0	708	1.03411	2.30971	NA	NA	1.18843	0.913581	-0.967014	-0.432955	0	NA	-0.841447	-1.09459
5A	169633160	TuG1812G0500001188.01	TuG1812G0500001188.01.T01	TC422931	100	500	0	0	1	500	329	828	0	924	1.43015	1.8325	0.744455	0.559909	0.624283	1.32204	-0.699225	-0.545704	-1.34326	-1.78601	-1.60184	-0.756405
5A	169633160	TuG1812G0500001188.01	TuG1812G0500001188.01.T05	comp22245_c0_seq1	97.701	87	2	0	1	87	570	656	9.02e-36	150	0.827289	0.577427	0.914755	0.585776	0.254663	0.487243	-1.20877	-1.73182	-1.09319	-1.70714	-3.92675	-2.05236
5A	169964912	TuG1812G0500001189.01	TuG1812G0500001189.01.T01	comp3020_c0_seq1	100	116	0	0	1	116	1429	1544	9.4e-55	215	0.855376	0.868567	0.399378	0.518959	0.273871	0.647552	-1.16908	-1.15132	-2.50389	-1.92693	-3.65135	-1.54428
5A	170563474	TuG1812G0500001190.01	TuG1812G0500001190.01.T01	comp2120_c0_seq1	99.563	229	1	0	1	229	1562	1790	5e-116	418	0.941727	0.727832	1.31399	1.10315	1.32204	1.02677	-1.06188	-1.37394	-0.76104	-0.906499	-0.756408	-0.97393
5A	171785437	TuG1812G0200005403.01	TuG1812G0200005403.01.T01	CK155747	96.512	86	3	0	3	88	153	238	3.24e-33	143	0	2.30971	NA	0	1.18843	1.21811	NA	-0.432955	0	NA	-0.841447	-0.820945
5A	171785437	TuG1812G0200005403.01	TuG1812G0200005403.01.T01	CK160687	94.366	142	8	0	58	199	97	238	5.24e-56	219	NA	0	NA	0	0	1.21811	0	NA	NA	NA	NA	-0.820945
5A	171785437	TuG1812G0200005403.01	TuG1812G0200005403.01.T01	TC371860	92.958	142	10	0	104	245	97	238	1.13e-52	207	1.79935	1.89726	0.58921	0.755102	0.599983	1.01718	-0.555755	-0.527076	-1.69719	-1.32432	-1.66671	-0.983107
5A	171785437	TuG1812G0200005403.01	TuG1812G0200005403.01.T01	TC456641	92.908	141	10	0	68	208	97	237	4.08e-52	206	0.14773	0.866141	1.37213	0.805442	1.18843	1.70535	-6.7691	-1.15455	-0.728792	-1.24155	-0.841447	-0.586389
5A	172469546	TuG1812G0500001193.01	TuG1812G0500001193.01.T01	CK157094	98.291	351	6	0	1	351	597	247	1.34e-175	616	0.98915	1.15485	1.22073	0.912835	0.888127	1.10427	-1.01097	-0.86591	-0.819185	-1.09549	-1.12597	-0.905579
5A	172469546	TuG1812G0500001193.01	TuG1812G0500001193.01.T01	TC259808	92.713	494	24	8	8	498	215	699	0	702	1.43767	1.50849	0.94376	1.05869	0.92846	1.10974	-0.695571	-0.662913	-1.05959	-0.944563	-1.07705	-0.901116
5A	172469546	TuG1812G0500001193.01	TuG1812G0500001193.01.T01	TC422447	99.8	500	0	1	1	500	467	965	0	917	1.41344	1.42889	0.852552	0.720706	0.783857	1.16262	-0.707496	-0.699845	-1.17295	-1.38753	-1.27574	-0.860123
5A	172469546	TuG1812G0500001193.01	TuG1812G0500001193.01.T01	comp34203_c0_seq1	93.333	45	3	0	8	52	422	466	3.72e-11	67.6	NA	1.15485	NA	NA	NA	NA	NA	-0.86591	NA	NA	NA	NA
5A	172469546	TuG1812G0500001193.01	TuG1812G0500001193.01.T01	comp782_c0_seq1	96.318	516	17	2	5	520	813	300	0	846	1.41015	1.46439	0.983763	0.79698	0.753149	1.09185	-0.709144	-0.682879	-1.0165	-1.25474	-1.32776	-0.915879
5A	173874147	TuG1812G0500001195.01	TuG1812G0500001195.01.T01	TC371117	98.986	493	3	1	1	493	538	1028	0	881	0.715923	1.34733	2.46984	1.14552	1.12901	1.26496	-1.3968	-0.742209	-0.404885	-0.872968	-0.885734	-0.79054
5A	173874147	TuG1812G0500001195.01	TuG1812G0500001195.01.T01	comp14992_c0_seq1	100	337	0	0	2	338	733	1069	6.58e-178	623	1.04586	1.24818	1.48569	0.980906	1.18843	1.23526	-0.956149	-0.801169	-0.673088	-1.01947	-0.841447	-0.809543
5A	174364383	TuG1812G0500001196.01	TuG1812G0500001196.01.T01	comp12274_c0_seq1	95.62	137	6	0	6	142	2552	2688	1.25e-56	220	0.0480982	0	0.00980095	0.00910104	0.0343476	0.0261023	-20.7908	NA	-102.031	-109.878	-29.1141	-38.3108
5A	176089005	TuG1812G0500001200.01	TuG1812G0500001200.01.T01	TC413970	100	500	0	0	1	500	422	921	0	924	1.24093	0.923884	0.548853	0.306835	0.237686	0.121811	-0.805845	-1.08239	-1.82198	-3.25908	-4.20724	-8.20945
5A	176089005	TuG1812G0500001200.01	TuG1812G0500001200.01.T01	TC427990	99.558	226	1	0	243	468	226	1	2.24e-114	412	1.03411	0	NA	NA	1.18843	0	-0.967014	NA	0	NA	-0.841447	NA
5A	176589571	TuG1812G0500001204.01	TuG1812G0500001204.01.T01	CA671152	91.361	463	17	21	1	441	1130	1591	1.59e-175	616	0.258528	NA	NA	0.536962	0.396143	1.21811	-3.86806	0	0	-1.86233	-2.52434	-0.820945
5A	176589571	TuG1812G0500001204.01	TuG1812G0500001204.01.T01	TC393346	98.998	499	5	0	1	499	259	757	0	894	NA	0	NA	4.29569	NA	NA	NA	NA	0	-0.232791	NA	NA
5A	176589571	TuG1812G0500001204.01	TuG1812G0500001204.01.T01	TC407642	95.879	364	9	3	1	363	1265	1623	4.48e-166	584	0.658071	0.866141	0.548853	0.585776	0.594214	0.744399	-1.51959	-1.15455	-1.82198	-1.70714	-1.68289	-1.34336
5A	176589571	TuG1812G0500001204.01	TuG1812G0500001204.01.T01	comp5930_c0_seq1	99.072	431	4	0	1	431	1227	1657	0	774	0.986049	0.908913	0.313373	0.55953	0.334027	0.895697	-1.01415	-1.10022	-3.19109	-1.78721	-2.99377	-1.11645
5A	178470180	TuG1812G0500001206.01	TuG1812G0500001206.01.T01	TC414588	96.819	503	13	1	1	500	1425	1927	0	837	1.44776	0.461942	1.50935	1.71828	0.891321	2.67984	-0.690724	-2.16477	-0.662538	-0.581978	-1.12193	-0.373157
5A	178748745	TuG1812G0500001208.01	TuG1812G0500001208.01.T01	TC386644	87.901	405	29	18	1	387	731	1133	2.83e-128	459	NA	NA	NA	0.715949	NA	NA	NA	0	0	-1.39675	NA	0
5A	178748745	TuG1812G0500001208.01	TuG1812G0500001208.01.T02	TC394219	97.796	499	10	1	1	499	590	1087	0	859	NA	4.04199	0.686067	0.715949	0	0	0	-0.247403	-1.45758	-1.39675	NA	NA
5A	178748745	TuG1812G0500001208.01	TuG1812G0500001208.01.T01	TC454627	97	500	12	2	1	500	1560	1064	0	837	1.29264	0.692913	1.78377	0.805442	1.18843	1.06584	-0.773611	-1.44318	-0.560609	-1.24155	-0.841447	-0.938223
5A	178748745	TuG1812G0500001208.01	TuG1812G0500001208.01.T01	comp10944_c0_seq1	98.542	343	5	0	15	357	1162	1504	6.68e-173	606	1.10494	0.903302	0.731804	1.12928	0.896037	0.77516	-0.905026	-1.10705	-1.36649	-0.88552	-1.11602	-1.29006
5A	178748745	TuG1812G0500001208.01	TuG1812G0500001208.01.T01	comp17083_c0_seq1	97.826	276	4	2	1	274	1137	862	1.47e-133	475	5.26457	1.73228	0.493968	0.438336	0.216078	0.82935	-0.189949	-0.577273	-2.02442	-2.28136	-4.62796	-1.20576
5A	178748745	TuG1812G0500001208.01	TuG1812G0500001208.01.T01	comp28312_c0_seq1	97.297	74	2	0	1	74	833	760	1.57e-28	126	4.6535	1.87664	0.731804	1.07392	2.71641	3.65432	-0.214892	-0.532868	-1.36649	-0.931165	-0.368133	-0.273648
5A	180166654	TuG1812G0500001212.01	TuG1812G0500001212.01.T01	TC271657	90.535	243	21	2	1	243	514	754	9.99e-87	320	0.517056	0	NA	1.07392	0.792286	0.304527	-1.93403	NA	0	-0.931165	-1.26217	-3.28378
5A	180166654	TuG1812G0500001212.01	TuG1812G0500001212.01.T01	TC438186	93.447	351	21	2	1	351	401	749	3.56e-147	521	0.689408	0.577427	0.41164	0.536962	0.237686	3.65432	-1.45052	-1.73182	-2.42931	-1.86233	-4.20724	-0.273648
5A	181012298	TuG1812G0500001220.01	TuG1812G0500001220.01.T01	TC241053	92.216	501	31	4	1	498	2508	3003	0	702	NA	NA	0.274427	NA	0	NA	NA	NA	-3.64396	NA	NA	NA
5A	181012298	TuG1812G0500001220.01	TuG1812G0500001220.01.T01	TC380189	98.4	500	4	1	1	500	2503	2998	0	876	0.574506	0.944881	3.97919	1.14552	1.18843	0.859841	-1.74063	-1.05833	-0.251308	-0.872968	-0.841447	-1.16301
5A	181012298	TuG1812G0500001220.01	TuG1812G0500001220.01.T01	comp20984_c0_seq1	99.55	222	1	0	1	222	2841	3062	1.56e-112	405	1.32957	1.48481	2.10394	0.357974	0.950743	0.669959	-0.752122	-0.673486	-0.475299	-2.7935	-1.05181	-1.49263
5A	181613501	TuG1812G0500001223.01	TuG1812G0500001223.01.T01	TC247936	96.167	287	11	0	1	287	1545	1831	1.31e-131	470	4.6535	0.824896	NA	0	0.594214	0.696062	-0.214892	-1.21227	0	NA	-1.68289	-1.43665
5A	181613501	TuG1812G0500001223.01	TuG1812G0500001223.01.T01	TC393951	99.8	499	1	0	1	499	1550	2048	0	917	0.664786	1.44357	3.01869	1.16342	1.35049	1.21811	-1.50424	-0.692728	-0.331269	-0.859537	-0.740474	-0.820945
5A	181613501	TuG1812G0500001223.01	TuG1812G0500001223.01.T01	comp7934_c0_seq1	90.671	343	2	2	1	343	1836	2148	1.49e-119	429	1.00324	0.97521	1.20581	0.966531	1.03987	0.956366	-0.996768	-1.02542	-0.829315	-1.03463	-0.961654	-1.04562
5A	181616887	TuG1812G0500001224.01	TuG1812G0500001224.01.T01	TC266339	89.003	391	26	7	1	391	177	550	4.71e-131	468	0.689408	4.61942	NA	0	NA	NA	-1.45052	-0.216477	0	NA	NA	0
5A	181616887	TuG1812G0500001224.01	TuG1812G0500001224.01.T01	comp1786_c0_seq1	98.777	327	2	2	22	346	698	372	4.17e-165	580	1.1688	1.15689	1.13861	0.872037	0.910873	0.983919	-0.855581	-0.864385	-0.878267	-1.14674	-1.09785	-1.01634
5A	182375591	TuG1812G0500001226.01	TuG1812G0500001226.01.T01	CA618135	94.99	519	2	24	1	495	749	1267	0	793	NA	1.15485	0	NA	0	NA	NA	-0.86591	NA	NA	NA	NA
5A	182375591	TuG1812G0500001226.01	TuG1812G0500001226.01.T01	TC267546	88.273	469	28	11	1	443	879	1346	1.12e-151	536	1.12812	0.799515	0.594591	0.357974	0.933765	0.843306	-0.886429	-1.25076	-1.68183	-2.7935	-1.07093	-1.18581
5A	182375591	TuG1812G0500001226.01	TuG1812G0500001226.01.T01	TC388481	96.429	504	14	2	1	500	788	1291	0	828	1.89587	0.923884	1.44074	0.395656	0.519937	1.16515	-0.527462	-1.08239	-0.694088	-2.52745	-1.92331	-0.858261
5A	182375591	TuG1812G0500001226.01	TuG1812G0500001226.01.T01	TC416632	96.64	506	8	1	1	497	844	1349	0	832	0.517056	1.50131	4.66525	0.683406	0.713057	1.62414	-1.93403	-0.666085	-0.214351	-1.46326	-1.40241	-0.615709
5A	182375591	TuG1812G0500001226.01	TuG1812G0500001226.01.T01	comp31696_c0_seq1	99.281	139	1	0	2	140	1211	1349	1.46e-66	252	1.49372	1.84777	0.795837	0.644354	0.514986	0.953302	-0.669471	-0.541194	-1.25654	-1.55194	-1.9418	-1.04899
5A	182834273	TuG1812G0500001227.01	TuG1812G0500001227.01.T02	TC244467	95.484	465	18	1	1	462	778	1242	0	739	1.16338	0.734907	NA	1.50349	1.40451	1.52264	-0.859568	-1.36072	0	-0.665118	-0.711994	-0.656756
5A	182834273	TuG1812G0500001227.01	TuG1812G0500001227.01.T02	comp9064_c0_seq1	100	342	0	0	19	360	922	1263	1.15e-180	632	0.875387	0.766129	1.4902	0.853002	1.17489	0.872024	-1.14235	-1.30526	-0.671051	-1.17233	-0.851147	-1.14676
5A	183514715	TuG1812G0500001228.01	TuG1812G0500001228.01.T01	TC420914	99.6	500	2	0	1	500	86	585	0	913	1.08112	0.923884	0.795837	0.628638	0.535958	1.62414	-0.92497	-1.08239	-1.25654	-1.59074	-1.86582	-0.615709
5A	183514715	TuG1812G0500001228.01	TuG1812G0500001228.01.T01	comp15491_c0_seq1	98.69	229	3	0	14	242	587	359	4.78e-113	407	1.05551	0.730012	0.780809	0.490344	0.621378	1.55969	-0.947412	-1.36984	-1.28072	-2.03938	-1.60933	-0.641151
5A	183525059	TuG1812G0500001229.01	TuG1812G0500001229.01.T01	TC386677	94.118	306	17	1	195	500	1400	1704	6.09e-130	464	NA	NA	NA	2.14785	NA	1.21811	NA	0	NA	-0.465583	NA	-0.820945
5A	183525059	TuG1812G0500001229.01	TuG1812G0500001229.01.T01	TC402009	97.674	344	7	1	1	344	1412	1754	9.63e-168	590	2.21595	0.729382	1.09771	0.439332	0.198071	0.659809	-0.451273	-1.37102	-0.91099	-2.27618	-5.04868	-1.51559
5A	183525059	TuG1812G0500001229.01	TuG1812G0500001229.01.T01	comp25327_c0_seq1	98.958	192	2	0	1	192	1563	1754	3.91e-94	344	1.77276	2.54068	0.41164	1.0174	0.465037	1.62414	-0.564091	-0.393595	-2.42931	-0.982897	-2.15037	-0.615709
5A	183530593	TuG1812G0500001230.01	TuG1812G0500001230.01.T01	GH733193	97.761	134	3	0	159	292	3510	3643	3.78e-60	231	NA	NA	NA	0	0	1.21811	0	0	0	NA	NA	-0.820945
5A	183530593	TuG1812G0500001230.01	TuG1812G0500001230.01.T01	comp40349_c0_seq1	99.545	220	1	0	1	220	3361	3580	2e-111	401	4.13645	1.15485	NA	0	1.18843	1.82716	-0.241753	-0.86591	0	NA	-0.841447	-0.547297
5A	183537754	TuG1812G0500001231.01	TuG1812G0500001231.01.T01	TC425762	100	490	0	0	1	490	1341	1830	0	905	0.620467	0.384951	2.19541	0	0.509326	0.203018	-1.61169	-2.59773	-0.455495	NA	-1.96338	-4.92567
5A	184385555	TuG1812G0500001236.01	TuG1812G0500001236.01.T04	TC382243	100	259	0	0	1	259	530	788	2.17e-134	479	NA	0	0.82328	0.715949	2.773	1.82716	0	NA	-1.21465	-1.39675	-0.36062	-0.547297
5A	185087617	TuG1812G0500001238.01	TuG1812G0500001238.01.T02	AV942070	97.2	500	14	0	1	500	162	661	0	846	NA	0	NA	NA	NA	1.82716	NA	NA	NA	NA	NA	-0.547297
5A	185087617	TuG1812G0500001238.01	TuG1812G0500001238.01.T02	BI955984	91.075	493	32	11	1	493	1618	2098	0	656	2.06822	2.30971	NA	0.357974	2.37686	1.21811	-0.483507	-0.432955	0	-2.7935	-0.420724	-0.820945
5A	185087617	TuG1812G0500001238.01	TuG1812G0500001238.01.T02	BI956031	93.613	501	30	2	1	500	1374	1873	0	749	1.03411	1.6168	0.900119	0.681528	0.810928	1.00059	-0.967014	-0.618507	-1.11096	-1.46729	-1.23316	-0.999412
5A	185087617	TuG1812G0500001238.01	TuG1812G0500001238.01.T02	CV776274	93.587	499	15	17	1	499	1348	1829	0	728	1.4773	0.513269	1.0193	1.24714	0.548505	0.714063	-0.67691	-1.9483	-0.981067	-0.801837	-1.82314	-1.40044
5A	185087617	TuG1812G0500001238.01	TuG1812G0500001238.01.T02	TC244531	88.501	487	49	7	1	484	1733	2215	1.61e-165	582	1.03411	0.384951	0.82328	0.61367	1.18843	0.609054	-0.967014	-2.59773	-1.21465	-1.62954	-0.841447	-1.64189
5A	185087617	TuG1812G0500001238.01	TuG1812G0500001238.01.T02	TC245265	94.81	501	23	3	1	499	2003	2502	0	787	NA	0	NA	0	1.18843	NA	NA	NA	0	NA	-0.841447	NA
5A	185087617	TuG1812G0500001238.01	TuG1812G0500001238.01.T02	TC251323	94.609	371	17	3	1	370	2577	2945	3.49e-162	571	NA	1.15485	NA	0	0	NA	0	-0.86591	0	NA	NA	NA
5A	185087617	TuG1812G0500001238.01	TuG1812G0500001238.01.T02	TC374090	100	499	0	0	1	499	2650	3148	0	922	1.24093	1.36016	1.56815	0.892611	0.322943	1.13263	-0.805845	-0.735207	-0.637693	-1.12031	-3.09653	-0.882903
5A	185087617	TuG1812G0500001238.01	TuG1812G0500001238.01.T02	TC382141	94.056	286	12	4	1	281	2864	3149	2.22e-119	429	0.775583	1.44357	0.392038	0.678267	0.339551	0.996634	-1.28935	-0.692728	-2.55077	-1.47435	-2.94507	-1.00338
5A	185087617	TuG1812G0500001238.01	TuG1812G0500001238.01.T02	TC391947	97.436	468	2	10	1	458	960	1427	0	789	1.03411	2.88714	0.274427	0	2.37686	0.203018	-0.967014	-0.346364	-3.64396	NA	-0.420724	-4.92567
5A	185087617	TuG1812G0500001238.01	TuG1812G0500001238.01.T02	TC405357	99.42	345	2	0	1	345	391	735	7.34e-179	627	NA	NA	NA	0	1.18843	0	NA	0	0	NA	-0.841447	NA
5A	185087617	TuG1812G0500001238.01	TuG1812G0500001238.01.T02	TC453927	96.471	340	5	2	1	333	2776	3115	3.51e-157	555	1.55117	0.866141	0.640329	0.330438	0.822758	6.69959	-0.644676	-1.15455	-1.5617	-3.02629	-1.21542	-0.149263
5A	185087617	TuG1812G0500001238.01	TuG1812G0500001238.01.T02	comp1502_c0_seq1	99.7	333	1	0	19	351	3150	2818	5.07e-174	610	1.21976	1.31949	0.841798	0.702707	0.599671	1.07762	-0.819836	-0.757868	-1.18793	-1.42307	-1.66758	-0.927968
5A	186995185	TuG1812G0500001240.01	TuG1812G0500001240.01.T01	TC399874	97.804	501	10	1	1	500	1437	1937	0	863	2.41293	1.96325	0.768394	0.656286	0.660238	0.691359	-0.414435	-0.509359	-1.30141	-1.52373	-1.51461	-1.44643
5A	186995185	TuG1812G0500001240.01	TuG1812G0500001240.01.T01	comp29882_c0_seq1	100	178	0	0	21	198	1636	1813	9.42e-90	329	0.975019	1.15485	0.391058	0.839388	0.856368	1.4865	-1.02562	-0.86591	-2.55717	-1.19134	-1.16772	-0.672719
5A	187014322	TuG1812G0500001241.01	TuG1812G0500001241.01.T01	CK217977	95.057	263	8	5	1	262	897	1155	2.24e-114	412	0.258528	1.15485	NA	0	0.792286	0	-3.86806	-0.86591	0	NA	-1.26217	NA
5A	187014322	TuG1812G0500001241.01	TuG1812G0500001241.01.T01	TC238741	94.99	499	17	1	1	491	653	1151	0	776	NA	NA	0.274427	0	0.594214	0.609054	NA	NA	-3.64396	NA	-1.68289	-1.64189
5A	187014322	TuG1812G0500001241.01	TuG1812G0500001241.01.T01	TC401413	92.803	264	8	1	1	264	958	1210	3.8e-102	372	NA	0	0.274427	0	NA	NA	0	NA	-3.64396	NA	NA	NA
5A	187014322	TuG1812G0500001241.01	TuG1812G0500001241.01.T01	TC410638	97.047	508	7	1	1	500	385	892	0	850	NA	NA	0.274427	0	NA	NA	NA	NA	-3.64396	NA	NA	0
5A	187014322	TuG1812G0500001241.01	TuG1812G0500001241.01.T01	TC437244	99.8	500	1	0	1	500	680	1179	0	918	0	0	0.274427	2.14785	0.198071	0	NA	NA	-3.64396	-0.465583	-5.04868	NA
5A	187014322	TuG1812G0500001241.01	TuG1812G0500001241.01.T01	comp21784_c0_seq1	100	71	0	0	1	71	1140	1210	1.2e-30	132	0	0	NA	4.29569	1.18843	NA	NA	NA	0	-0.232791	-0.841447	NA
5A	187014322	TuG1812G0500001241.01	TuG1812G0500001241.01.T01	comp574_c0_seq1	99.344	305	2	0	18	322	1163	859	8.22e-157	553	1.4724	1.33734	0.884348	0.734117	0.671814	0.944963	-0.679161	-0.747755	-1.13078	-1.36218	-1.48851	-1.05824
5A	187181572	TuG1812G0500001243.01	TuG1812G0500001243.01.T01	TC412705	98.4	500	7	1	1	500	503	5	0	878	NA	NA	0.137213	NA	1.18843	2.43622	0	NA	-7.28792	0	-0.841447	-0.410473
5A	187183472	TuG1812G0500001244.01	TuG1812G0500001244.01.T01	TC408889	94.012	501	24	3	1	500	716	221	0	754	2.06822	0.734907	3.01869	2.14785	1.03987	2.13169	-0.483507	-1.36072	-0.331269	-0.465583	-0.961654	-0.469112
5A	187183472	TuG1812G0500001244.01	TuG1812G0500001244.01.T01	comp33266_c0_seq1	98.049	205	4	0	1	205	592	388	4.05e-98	357	0.517056	0.769903	NA	1.07392	3.56529	1.21811	-1.93403	-1.29886	0	-0.931165	-0.280482	-0.820945
5A	188124551	TuG1812G0500001245.01	TuG1812G0500001245.01.T01	TC388476	100	500	0	0	1	500	3031	3530	0	924	2.13285	1.60396	1.33293	0.843797	1.1092	1.21811	-0.468855	-0.623455	-0.750227	-1.18512	-0.901551	-0.820945
5A	188317527	TuG1812G0500001246.01	TuG1812G0500001246.01.T01	BE419344	99.6	500	1	1	1	500	208	706	0	911	0.517056	1.44357	0.82328	NA	1.42611	0.913581	-1.93403	-0.692728	-1.21465	0	-0.701206	-1.09459
5A	188741709	TuG1812G0500001247.01	TuG1812G0500001247.01.T01	TC240403	94.472	199	4	2	1	195	2819	3014	1.82e-80	300	1.37882	1.22703	0.666465	0.660876	0.742768	0.679874	-0.72526	-0.814974	-1.50045	-1.51314	-1.34632	-1.47086
5A	188741709	TuG1812G0500001247.01	TuG1812G0500001247.01.T01	TC269590	99	500	5	0	1	500	1415	1914	0	896	1.03411	NA	NA	NA	NA	1.21811	-0.967014	0	0	0	0	-0.820945
5A	188741709	TuG1812G0500001247.01	TuG1812G0500001247.01.T01	TC420876	99.733	374	1	0	1	374	2645	3018	0	686	1.21553	1.6168	0.742566	1.00923	0.565369	0.945637	-0.822683	-0.618507	-1.34668	-0.990855	-1.76876	-1.05749
5A	188741709	TuG1812G0500001247.01	TuG1812G0500001247.01.T01	comp13927_c0_seq1	100	192	0	0	22	213	2827	3018	2.65e-97	355	1.26032	1.22647	0.9629	0.604082	0.578978	0.790599	-0.793447	-0.815346	-1.03853	-1.65541	-1.72718	-1.26486
5A	188747977	TuG1812G0500001248.01	TuG1812G0500001248.01.T03	comp29835_c0_seq1	97.872	47	1	0	180	226	263	217	4.86e-15	82.4	2.06822	1.15485	4.1164	0	2.07975	0.730865	-0.483507	-0.86591	-0.242931	NA	-0.480827	-1.36824
5A	189320775	TuG1812G0500001251.01	TuG1812G0500001251.01.T01	TC241355	92.495	493	21	6	20	500	2974	3462	0	691	3.10233	1.53981	1.64656	1.61088	2.37686	0	-0.322338	-0.649432	-0.607327	-0.620777	-0.420724	NA
5A	189320775	TuG1812G0500001251.01	TuG1812G0500001251.01.T01	TC370461	95.644	505	12	5	1	500	2889	3388	0	802	0.846091	0.721784	0.731804	1.22734	0.519937	1.82716	-1.18191	-1.38546	-1.36649	-0.81477	-1.92331	-0.547297
5A	189320775	TuG1812G0500001251.01	TuG1812G0500001251.01.T01	comp9304_c0_seq1	99.096	332	1	2	1	330	3154	3485	1.37e-169	595	0.992747	0.641586	0.98938	0.809333	0.820582	0.796455	-1.00731	-1.55864	-1.01073	-1.23558	-1.21865	-1.25556
5A	189365523	TuG1812G0500001252.01	TuG1812G0500001252.01.T01	TC440982	97.734	353	4	1	1	353	488	140	2.37e-172	604	1.72352	1.15485	0.686067	1.61088	0.198071	6.09054	-0.580208	-0.86591	-1.45758	-0.620777	-5.04868	-0.164189
5A	189790560	TuG1812G0500001255.01	TuG1812G0500001255.01.T01	CD909431	99.237	131	1	0	11	141	903	1033	3.56e-62	237	0.775583	0.866141	NA	0.859138	2.13917	2.43622	-1.28935	-1.15455	0	-1.16396	-0.467471	-0.410473
5A	189790560	TuG1812G0500001255.01	TuG1812G0500001255.01.T01	comp11687_c0_seq2	96.875	160	5	0	1	160	867	1026	1.47e-71	268	1.4219	0.753166	0.878165	0.596624	0.871514	0.913581	-0.703283	-1.32773	-1.13874	-1.6761	-1.14743	-1.09459
5A	189790560	TuG1812G0500001255.01	TuG1812G0500001255.01.T01	comp11687_c0_seq4	89.583	144	12	3	1	144	867	1007	6.24e-45	180	1.37882	NA	0.548853	1.07392	0	1.46173	-0.72526	0	-1.82198	-0.931165	NA	-0.684121
5A	189801379	TuG1812G0500001256.01	TuG1812G0500001256.01.T01	TC390670	99.202	501	2	1	1	499	640	1140	0	902	2.64991	1.47565	0.768394	0.406349	1.06333	1.31181	-0.377371	-0.677669	-1.30141	-2.46094	-0.940441	-0.762306
5A	189801379	TuG1812G0500001256.01	TuG1812G0500001256.01.T02	TC448038	97.368	38	1	0	334	371	887	924	7.22e-10	65.8	18.614	2.88714	1.15259	0.373538	1.11415	0.913581	-0.053723	-0.346364	-0.86761	-2.6771	-0.897544	-1.09459
5A	189801379	TuG1812G0500001256.01	TuG1812G0500001256.01.T01	comp34478_c0_seq1	97.98	99	0	1	1	97	1042	1140	3.16e-42	171	NA	1.15485	NA	2.14785	2.37686	0.609054	0	-0.86591	0	-0.465583	-0.420724	-1.64189
5A	189973265	TuG1812G0500001257.01	TuG1812G0500001257.01.T01	TC416748	98.214	504	4	2	1	500	2407	2909	0	876	NA	NA	0.548853	0	NA	1.21811	0	NA	-1.82198	NA	NA	-0.820945
5A	190054501	TuG1812G0500001260.01	TuG1812G0500001260.01.T01	TC248805	88.34	506	36	10	1	490	643	1141	1.25e-166	586	0	0.461942	0.548853	1.07392	5.94214	0	NA	-2.16477	-1.82198	-0.931165	-0.168289	NA
5A	190054501	TuG1812G0500001260.01	TuG1812G0500001260.01.T01	TC396780	99.8	500	1	0	1	500	569	1068	0	918	1.03411	0.769903	0.82328	1.61088	6.73443	0.685186	-0.967014	-1.29886	-1.21465	-0.620777	-0.148491	-1.45946
5A	190054501	TuG1812G0500001260.01	TuG1812G0500001260.01.T01	TC398418	99.6	500	2	0	1	500	632	1131	0	913	1.03411	1.15485	1.64656	2.14785	1.6638	1.21811	-0.967014	-0.86591	-0.607327	-0.465583	-0.601034	-0.820945
5A	190185169	TuG1812G0500001263.01	TuG1812G0500001263.01.T01	comp9201_c0_seq1	98.554	415	6	0	110	524	1830	1416	0	734	1.4773	1.4326	0.683478	0.683891	0.68539	1.27016	-0.67691	-0.698029	-1.46311	-1.46222	-1.45902	-0.7873
5A	190581456	TuG1812G0500001265.01	TuG1812G0500001265.01.T01	TC447961	93.676	506	22	9	1	500	1930	2431	0	749	1.03411	0.384951	NA	0	0.950743	2.43622	-0.967014	-2.59773	0	NA	-1.05181	-0.410473
5A	191885326	TuG1812G0500001268.01	TuG1812G0500001268.01.T01	comp5657_c0_seq1	100	445	0	0	1	445	539	983	0	822	1.52712	1.18716	1.96019	1.44915	1.36669	1.27566	-0.654828	-0.842348	-0.510155	-0.69006	-0.731693	-0.78391
5A	192444901	TuG1812G0500001269.01	TuG1812G0500001269.01.T02	TC379652	97.308	483	11	1	1	483	1301	1781	0	819	0.43088	0.412448	0.61746	0.452178	0.41595	1.1369	-2.32083	-2.42455	-1.61954	-2.21152	-2.40414	-0.879584
5A	192699695	TuG1812G0500001270.01	TuG1812G0500001270.01.T01	TC373064	99.002	501	4	1	1	500	1326	1826	0	896	0.804309	0.769903	2.0582	0.585776	0.924333	2.03018	-1.2433	-1.29886	-0.485862	-1.70714	-1.08186	-0.492567
5A	192699695	TuG1812G0500001270.01	TuG1812G0500001270.01.T01	comp20619_c0_seq1	100	191	0	0	1	191	1676	1866	5.36e-97	353	2.06822	0.824896	0.740952	0.687311	0.920074	0.801387	-0.483507	-1.21227	-1.34962	-1.45495	-1.08687	-1.24784
5A	192699695	TuG1812G0500001270.01	TuG1812G0500001270.01.T01	comp23502_c0_seq1	99.13	230	2	0	1	230	1453	1682	2.7e-115	414	0.459605	1.03937	0.640329	1.07392	0.679102	1.97943	-2.17578	-0.962122	-1.5617	-0.931165	-1.47253	-0.505197
5A	192710570	TuG1812G0500001271.01	TuG1812G0500001271.01.T01	TC397756	98.403	501	6	2	1	500	4507	5006	0	880	NA	NA	0.137213	0.536962	0.594214	0	0	0	-7.28792	-1.86233	-1.68289	NA
5A	192710570	TuG1812G0500001271.01	TuG1812G0500001271.01.T01	TC432213	98.309	414	7	0	1	414	5826	6239	0	726	0.979684	1.38583	3.11017	0.715949	0.696665	1.36141	-1.02074	-0.721592	-0.321526	-1.39675	-1.43541	-0.73453
5A	193972849	TuG1812G0500001277.01	TuG1812G0500001277.01.T01	comp22792_c0_seq1	100	84	0	0	2	85	1772	1855	3.01e-37	156	1.14901	0.769903	NA	1.28871	3.56529	1.74015	-0.870313	-1.29886	0	-0.775971	-0.280482	-0.574662
5A	195303488	TuG1812G0500001278.01	TuG1812G0500001278.01.T02	TC399534	99.601	501	1	1	1	500	1329	1829	0	913	1.58564	3.00262	0.431242	0.13424	0.349538	1.62414	-0.630661	-0.333042	-2.31888	-7.44932	-2.86092	-0.615709
5A	195303488	TuG1812G0500001278.01	TuG1812G0500001278.01.T02	TC401517	96.341	492	17	1	10	500	1292	1783	0	808	8.27289	0.659917	0.548853	0.920505	0.297107	0.487243	-0.120877	-1.51534	-1.82198	-1.08636	-3.36579	-2.05236
5A	195963274	TuG1812G0500001282.01	TuG1812G0500001282.01.T01	TC247261	90.385	468	24	16	1	462	349	801	2.07e-169	595	1.03411	NA	NA	NA	0	0	-0.967014	NA	0	0	NA	NA
5A	195963274	TuG1812G0500001282.01	TuG1812G0500001282.01.T01	comp6384_c0_seq1	98.729	472	5	1	87	557	1296	825	0	837	1.28196	1.06428	0.716558	0.594493	0.776226	0.860554	-0.780058	-0.939604	-1.39556	-1.68211	-1.28828	-1.16204
5A	195964872	TuG1812G0500001283.01	TuG1812G0500001283.01.T01	TC386744	99.593	492	2	0	1	492	257	748	0	898	1.20646	1.68786	5.76296	3.22177	NA	4.75062	-0.828869	-0.592465	-0.173522	-0.310388	0	-0.210499
5A	195967149	TuG1812G0500001284.01	TuG1812G0500001284.01.T01	TC410205	99.598	498	2	0	1	498	171	668	0	909	1.37882	1.15485	NA	NA	2.37686	1.04409	-0.72526	-0.86591	0	0	-0.420724	-0.957769
5A	195971244	TuG1812G0500001285.01	TuG1812G0500001285.01.T01	comp47038_c0_seq1	97.74	177	1	1	1	177	1187	1360	1.66e-81	302	1.03411	1.15485	NA	NA	0	0.609054	-0.967014	-0.86591	0	NA	NA	-1.64189
5A	195971244	TuG1812G0500001285.01	TuG1812G0500001285.01.T01	comp48913_c0_seq1	100	141	0	0	3	143	1342	1482	2.73e-69	261	2.06822	1.15485	NA	NA	0	2.43622	-0.483507	-0.86591	0	NA	NA	-0.410473
5A	196131893	TuG1812G0500001286.01	TuG1812G0500001286.01.T02	CV758939	99.4	500	1	2	1	500	1352	1849	0	905	NA	1.15485	NA	0	NA	NA	NA	-0.86591	NA	NA	NA	NA
5A	196131893	TuG1812G0500001286.01	TuG1812G0500001286.01.T02	TC262470	92.095	506	30	8	1	496	1620	2125	0	706	1.55117	1.15485	NA	0.781035	1.58457	0	-0.644676	-0.86591	0	-1.28035	-0.631086	NA
5A	196131893	TuG1812G0500001286.01	TuG1812G0500001286.01.T02	TC392485	99.4	500	3	0	1	500	1767	2266	0	907	1.45173	1.60301	1.37213	1.16962	0.788116	0.715219	-0.688832	-0.623828	-0.728792	-0.854979	-1.26885	-1.39817
5A	196131893	TuG1812G0500001286.01	TuG1812G0500001286.01.T01	comp18672_c0_seq1	99.672	305	1	0	16	320	2352	2048	1.69e-158	558	1.49527	1.62199	1.26541	0.90643	0.855308	0.96397	-0.668776	-0.616528	-0.790257	-1.10323	-1.16917	-1.03738
5A	196272224	TuG1812G0500001287.01	TuG1812G0500001287.01.T01	TC248741	90.766	509	26	9	1	488	596	88	0	660	NA	1.15485	NA	NA	NA	NA	0	-0.86591	NA	NA	NA	NA
5A	196272224	TuG1812G0500001287.01	TuG1812G0500001287.01.T01	TC449894	88.985	463	51	0	1	463	672	210	9.7e-163	573	NA	1.15485	NA	NA	NA	3.65432	0	-0.86591	0	NA	0	-0.273648
5A	196272224	TuG1812G0500001287.01	TuG1812G0500001287.01.T01	TC451375	100	218	0	0	1	218	227	10	5.5e-112	403	5.51526	0.164979	1.64656	0	NA	1.46173	-0.181315	-6.06137	-0.607327	NA	0	-0.684121
5A	196272224	TuG1812G0500001287.01	TuG1812G0500001287.01.T01	comp27273_c0_seq1	80.102	196	30	6	2	188	411	216	9.75e-32	137	1.20646	0.673665	NA	NA	21.3917	6.33416	-0.828869	-1.48442	0	0	-0.0467471	-0.157874
5A	196539131	TuG1812G0500001288.01	TuG1812G0500001288.01.T01	TC445107	96.825	378	12	0	1	378	1252	1629	1.58e-180	632	1.62503	1.66812	2.37836	1.07392	2.773	1.08276	-0.615372	-0.599476	-0.420457	-0.931165	-0.36062	-0.923563
5A	196539131	TuG1812G0500001288.01	TuG1812G0500001288.01.T01	comp24593_c0_seq1	98.571	70	1	0	293	362	458	389	8.33e-28	124	0.861759	0.505249	3.56755	1.28871	2.13917	0.468503	-1.16042	-1.97922	-0.280305	-0.775971	-0.467471	-2.13446
5A	196539131	TuG1812G0500001288.01	TuG1812G0500001288.01.T01	comp2591_c1_seq1	93.694	111	7	0	1	111	1519	1629	1.4e-40	167	0.719823	0.954389	2.12136	0.755524	1.62167	1.1225	-1.38923	-1.04779	-0.471395	-1.32359	-0.616649	-0.890868
5A	196566018	TuG1812G0500001289.01	TuG1812G0500001289.01.T01	TC424976	96.622	444	15	0	3	446	1268	1711	0	737	1.03411	NA	0.41164	0	1.78264	1.21811	-0.967014	0	-2.42931	NA	-0.560965	-0.820945
5A	196566018	TuG1812G0500001289.01	TuG1812G0500001289.01.T01	comp9245_c0_seq1	99.177	243	2	0	1	243	1469	1711	1.88e-122	438	0.658071	0.742406	0.768394	1.04773	1.00559	0.913581	-1.51959	-1.34697	-1.30141	-0.954445	-0.994438	-1.09459
5A	198585602	TuG1812G0500001292.01	TuG1812G0500001292.01.T01	comp5658_c0_seq1	89.714	350	4	12	1	350	843	1160	5.37e-116	418	0.742439	0.728884	1.0766	1.10972	1.07447	1.00875	-1.34691	-1.37196	-0.928853	-0.901128	-0.930692	-0.99133
5A	198585602	TuG1812G0500001292.01	TuG1812G0500001292.01.T01	comp8042_c0_seq3	96.078	51	2	0	76	126	1	51	4.28e-16	84.2	2.06822	0	NA	NA	0	1.21811	-0.483507	NA	NA	0	NA	-0.820945
5A	198614178	TuG1812G0500001293.01	TuG1812G0500001293.01.T01	TC443555	96.976	496	10	4	3	498	802	312	0	828	0.517056	2.30971	NA	0	0	0	-1.93403	-0.432955	0	NA	NA	NA
5A	198627064	TuG1812G0500001296.01	TuG1812G0500001296.01.T01	TC408985	99.6	500	2	0	1	500	1075	1574	0	913	1.26914	0.95401	0.531702	0.826095	0.396143	1.11063	-0.787937	-1.04821	-1.88075	-1.21052	-2.52434	-0.900391
5A	198627064	TuG1812G0500001296.01	TuG1812G0500001296.01.T01	comp23831_c0_seq1	99.64	278	1	0	17	294	1326	1603	1.57e-143	508	1.6316	1.3015	0.82328	0.491337	0.62005	0.699284	-0.612896	-0.768343	-1.21465	-2.03526	-1.61277	-1.43003
5A	198700671	TuG1812G0500001297.01	TuG1812G0500001297.01.T01	comp18457_c0_seq1	100	71	0	0	368	438	337	267	7.65e-30	132	4.34327	3.09501	1.02453	0.851732	0.506182	1.813	-0.230241	-0.323101	-0.976061	-1.17408	-1.97557	-0.551573
5A	200043843	TuG1812G0500001300.01	TuG1812G0500001300.01.T03	CD921493	99.676	309	0	1	193	500	754	1062	5.84e-160	564	0.517056	NA	NA	1.4319	NA	1.21811	-1.93403	NA	0	-0.698374	NA	-0.820945
5A	200043843	TuG1812G0500001300.01	TuG1812G0500001300.01.T03	TC240871	93.625	502	28	4	1	500	994	1493	0	747	1.21185	1.00087	0.570807	0.603328	0.573143	1.1166	-0.825185	-0.999127	-1.7519	-1.65747	-1.74477	-0.895577
5A	200043843	TuG1812G0500001300.01	TuG1812G0500001300.01.T03	TC383996	96.788	467	15	0	1	467	1112	1578	0	780	NA	NA	0	0	0.594214	0	0	NA	NA	NA	-1.68289	NA
5A	200043843	TuG1812G0500001300.01	TuG1812G0500001300.01.T03	TC391533	95.263	190	2	7	295	484	3	185	8.46e-79	294	0	0	0.548853	0	1.18843	0	NA	NA	-1.82198	NA	-0.841447	NA
5A	200043843	TuG1812G0500001300.01	TuG1812G0500001300.01.T03	TC434516	96.559	494	12	5	7	500	967	1455	0	813	1.11366	1.34733	0.548853	0.787544	0.475371	1.94897	-0.897941	-0.742209	-1.82198	-1.26977	-2.10362	-0.513091
5A	200043843	TuG1812G0500001300.01	TuG1812G0500001300.01.T02	comp3880_c0_seq1	98.374	492	8	0	14	505	1613	1122	0	865	1.30914	1.16395	0.609434	0.787106	0.638418	1.20055	-0.76386	-0.859145	-1.64087	-1.27048	-1.56637	-0.832952
5A	200043843	TuG1812G0500001300.01	TuG1812G0500001300.01.T05	comp42556_c0_seq1	98.551	138	2	0	1	138	850	987	2.07e-64	244	NA	0.577427	NA	0.715949	0.198071	NA	0	-1.73182	0	-1.39675	-5.04868	0
5A	200072150	TuG1812G0500001301.01	TuG1812G0500001301.01.T01	comp4568_c0_seq1	98.438	320	4	1	1	319	973	1292	1.37e-159	562	0.463196	0.698084	1.86	1.02619	1.40065	0.68463	-2.15891	-1.43249	-0.537634	-0.974475	-0.713955	-1.46064
5A	200166615	TuG1812G0500001302.01	TuG1812G0500001302.01.T01	TC246822	94.6	500	22	2	1	499	1388	1883	0	769	2.06822	0.679326	0.713509	0.226089	0.704254	0.788188	-0.483507	-1.47205	-1.40152	-4.42304	-1.41994	-1.26873
5A	200166615	TuG1812G0500001302.01	TuG1812G0500001302.01.T01	TC390831	98.39	497	8	0	1	497	1383	1879	0	874	0.459605	0.769903	5.76296	0.429569	0.495179	0.664423	-2.17578	-1.29886	-0.173522	-2.32791	-2.01947	-1.50507
5A	200407203	TuG1812G0500001304.01	TuG1812G0500001304.01.T01	TC383628	97.576	495	12	0	1	495	323	817	0	848	0.574506	0.481189	0.82328	0	0.297107	0.406036	-1.74063	-2.07818	-1.21465	NA	-3.36579	-2.46284
5A	200407203	TuG1812G0500001304.01	TuG1812G0500001304.01.T01	TC422728	99.482	193	1	0	308	500	1	193	4.95e-96	351	0.344704	0.494938	1.64656	0	2.37686	1.82716	-2.90104	-2.02046	-0.607327	NA	-0.420724	-0.547297
5A	200407203	TuG1812G0500001304.01	TuG1812G0500001304.01.T01	comp6671_c0_seq1	99.208	379	2	1	1	378	379	757	0	682	0.672172	0.637161	0.480247	0.291233	0.55926	0.384666	-1.48771	-1.56946	-2.08226	-3.43367	-1.78808	-2.59966
5A	200407203	TuG1812G0500001304.01	TuG1812G0500001304.01.T01	comp6671_c0_seq3	99.54	435	2	0	1	435	379	813	0	793	1.12812	1.78478	1.41787	0.390517	1.63409	1.21811	-0.886429	-0.560295	-0.705283	-2.5607	-0.611962	-0.820945
5A	200762628	TuG1812G0500001307.01	TuG1812G0500001307.01.T01	TC259669	97.6	500	11	1	1	500	487	985	0	856	NA	NA	NA	NA	NA	1.21811	NA	NA	NA	NA	NA	-0.820945
5A	200762628	TuG1812G0500001307.01	TuG1812G0500001307.01.T01	TC381370	100	499	0	0	1	499	1640	2138	0	922	0.944189	1.2345	1.1282	0.843797	0.705629	1.02321	-1.05911	-0.810045	-0.886369	-1.18512	-1.41717	-0.977316
5A	200762628	TuG1812G0500001307.01	TuG1812G0500001307.01.T01	comp17176_c0_seq1	100	275	0	0	21	295	2156	1882	1.58e-143	508	1.3665	1.05235	1.26759	0.482355	0.750237	0.70118	-0.731794	-0.950252	-0.788899	-2.07316	-1.33291	-1.42617
5A	201813673	TuG1812G0500001309.01	TuG1812G0500001309.01.T01	TC241610	91.304	368	23	6	1	365	381	742	7.77e-139	494	0	2.30971	NA	2.14785	1.18843	0	NA	-0.432955	NA	-0.465583	-0.841447	NA
5A	201813673	TuG1812G0500001309.01	TuG1812G0500001309.01.T01	TC435945	98.478	460	7	0	2	461	150	609	0	811	1.31253	2.6305	2.60705	1.22037	0.708	1.19042	-0.76189	-0.380156	-0.383575	-0.819426	-1.41243	-0.840037
5A	201813673	TuG1812G0500001309.01	TuG1812G0500001309.01.T01	comp3574_c0_seq1	98.802	334	4	0	62	395	796	463	1.61e-169	595	1.09287	1.17032	1.1123	0.965324	1.01127	0.990103	-0.915024	-0.854466	-0.899035	-1.03592	-0.988854	-1.01
5A	202214710	TuG1812G0500001310.01	TuG1812G0500001310.01.T01	TC262156	89.303	402	29	7	1	400	1551	1940	2.79e-138	492	1.03411	0.824896	NA	0	3.56529	0.609054	-0.967014	-1.21227	0	NA	-0.280482	-1.64189
5A	202214710	TuG1812G0500001310.01	TuG1812G0500001310.01.T01	TC385443	99.2	500	3	1	1	500	1470	1968	0	900	1.51139	1.92476	1.12265	1.12274	1.30161	1.57339	-0.661641	-0.519546	-0.890746	-0.89068	-0.768278	-0.63557
5A	202214710	TuG1812G0500001310.01	TuG1812G0500001310.01.T01	comp14378_c0_seq1	100	304	0	0	17	320	1991	1688	1.31e-159	562	1.47312	1.98946	0.985441	1.27498	0.99828	1.09444	-0.678831	-0.50265	-1.01477	-0.784328	-1.00172	-0.913707
5A	202214710	TuG1812G0500001310.01	TuG1812G0500001310.01.T01	comp24483_c0_seq1	93.548	217	4	3	3	209	9	225	2.53e-85	315	4.6535	1.15485	1.64656	0.585776	0.891321	0.996634	-0.214892	-0.86591	-0.607327	-1.70714	-1.12193	-1.00338
5A	202349588	TuG1812G0300001556.01	TuG1812G0300001556.01.T01	TC376424	99.6	500	2	0	1	500	363	862	0	913	1.03411	1.15485	NA	4.29569	NA	NA	-0.967014	-0.86591	0	-0.232791	0	0
5A	202349588	TuG1812G0300001556.01	TuG1812G0300001556.01.T01	comp3057_c0_seq1	99.359	312	2	0	247	558	1080	769	1.82e-160	566	1.42301	1.32162	1.15421	0.786884	0.946473	1.09569	-0.702737	-0.756647	-0.866396	-1.27084	-1.05655	-0.912671
5A	202571824	TuG1812G0500001311.01	TuG1812G0500001311.01.T01	comp17908_c0_seq1	99.111	225	2	0	1	225	551	775	1.67e-112	405	1.55117	1.03329	3.22451	1.30172	0.731341	1.4888	-0.644676	-0.967782	-0.310124	-0.768211	-1.36735	-0.671682
5A	202990864	TuG1812G0500001315.01	TuG1812G0500001315.01.T01	TC396920	98.793	497	5	1	1	497	165	660	0	883	NA	NA	NA	2.14785	0	NA	NA	NA	NA	-0.465583	NA	NA
5A	202990864	TuG1812G0500001315.01	TuG1812G0500001315.01.T01	TC404158	98.2	500	9	0	1	500	582	1081	0	880	0	0.577427	NA	NA	0	NA	NA	-1.73182	NA	NA	NA	NA
5A	202990864	TuG1812G0500001315.01	TuG1812G0500001315.01.T01	TC410808	99.799	497	1	0	1	497	1362	1858	0	913	NA	NA	0	2.14785	1.18843	0	NA	NA	NA	-0.465583	-0.841447	NA
5A	202990864	TuG1812G0500001315.01	TuG1812G0500001315.01.T01	TC441523	93.177	469	24	8	1	466	1155	1618	0	682	1.12812	1.79644	0.548853	0.715949	0.594214	1.46173	-0.886429	-0.556656	-1.82198	-1.39675	-1.68289	-0.684121
5A	202990864	TuG1812G0500001315.01	TuG1812G0500001315.01.T01	TC441911	100	175	0	0	1	175	593	767	7.47e-88	324	1.4773	0.43307	0.82328	2.14785	0.540195	2.84225	-0.67691	-2.30909	-1.21465	-0.465583	-1.85118	-0.351834
5A	202990864	TuG1812G0500001315.01	TuG1812G0500001315.01.T01	comp930_c0_seq1	98.969	485	5	0	127	611	1862	1378	0	869	1.09028	1.22847	0.860559	0.727329	0.855718	0.98518	-0.917194	-0.814022	-1.16204	-1.37489	-1.16861	-1.01504
5A	203588444	TuG1812G0500001321.01	TuG1812G0500001321.01.T01	comp37849_c0_seq1	97.03	101	2	1	1	100	885	985	1.78e-41	169	2.06822	0.769903	0.640329	1.71828	0.475371	1.01509	-0.483507	-1.29886	-1.5617	-0.581978	-2.10362	-0.985134
5A	203588444	TuG1812G0500001321.01	TuG1812G0500001321.01.T01	comp39815_c0_seq1	98.81	168	0	1	1	168	216	381	2e-80	298	NA	0	0.82328	0	3.56529	1.21811	0	NA	-1.21465	NA	-0.280482	-0.820945
5A	203599838	TuG1812G0500001322.01	TuG1812G0500001322.01.T01	TC244855	94.85	233	12	0	1	233	1646	1878	6.35e-100	364	2.41293	0.577427	NA	1.61088	0.792286	0.812072	-0.414435	-1.73182	0	-0.620777	-1.26217	-1.23142
5A	203599838	TuG1812G0500001322.01	TuG1812G0500001322.01.T01	TC379349	94.257	505	21	8	1	497	725	1229	0	767	NA	NA	NA	0	0.297107	NA	NA	NA	0	NA	-3.36579	0
5A	203599838	TuG1812G0500001322.01	TuG1812G0500001322.01.T01	TC393090	98.998	499	5	0	1	499	1299	1797	0	894	1.66196	1.45426	0.777542	0.781035	0.579359	1.13952	-0.601698	-0.687634	-1.2861	-1.28035	-1.72605	-0.877562
5A	203599838	TuG1812G0500001322.01	TuG1812G0500001322.01.T01	TC421912	100	500	0	0	1	500	196	695	0	924	NA	1.15485	2.19541	0	0.594214	0.304527	0	-0.86591	-0.455495	NA	-1.68289	-3.28378
5A	203599838	TuG1812G0500001322.01	TuG1812G0500001322.01.T01	comp21853_c0_seq1	98.425	254	4	0	1	254	1651	1904	2.97e-125	448	1.63456	2.24893	0.865499	1.01885	0.792286	1.35564	-0.611784	-0.444656	-1.1554	-0.981499	-1.26217	-0.737661
5A	205658634	TuG1812G0500001323.01	TuG1812G0500001323.01.T01	TC252891	92.478	452	23	6	1	450	1658	2100	0	636	NA	NA	NA	0	NA	1.21811	NA	0	NA	NA	0	-0.820945
5A	205658634	TuG1812G0500001323.01	TuG1812G0500001323.01.T01	TC376050	98	500	10	0	1	500	1765	2264	0	869	1.8614	1.15485	0.960493	1.78987	0.891321	0.77516	-0.53723	-0.86591	-1.04113	-0.558699	-1.12193	-1.29006
5A	205658634	TuG1812G0500001323.01	TuG1812G0500001323.01.T04	TC396223	99.398	498	2	1	1	498	784	1280	0	902	0.689408	2.30971	NA	2.14785	NA	2.43622	-1.45052	-0.432955	0	-0.465583	0	-0.410473
5A	205658634	TuG1812G0500001323.01	TuG1812G0500001323.01.T01	comp26327_c0_seq1	98.462	325	5	0	1	325	1977	2301	6.66e-163	573	1.2041	1.53474	1.05985	0.659426	0.835818	0.97951	-0.830494	-0.651576	-0.943526	-1.51647	-1.19643	-1.02092
5A	207147922	TuG1812G0500001326.01	TuG1812G0500001326.01.T02	TC383722	99.567	462	2	0	1	462	972	1433	0	843	0.620467	1.19094	1.17255	1.22734	1.27332	0.986088	-1.61169	-0.83967	-0.852842	-0.81477	-0.785351	-1.01411
5A	207147922	TuG1812G0500001326.01	TuG1812G0500001326.01.T01	comp20753_c0_seq1	98.78	82	1	0	345	426	658	739	2.26e-34	147	0.827289	0.505249	1.37213	0.536962	0.768983	1.31181	-1.20877	-1.97922	-0.728792	-1.86233	-1.30042	-0.762306
5A	207147922	TuG1812G0500001326.01	TuG1812G0500001326.01.T02	comp4404_c0_seq1	89.299	271	10	7	11	262	400	670	1.94e-87	322	0.936049	0.823742	0.805382	0.690916	1.21585	0.72539	-1.06832	-1.21397	-1.24165	-1.44735	-0.822467	-1.37857
5A	207147922	TuG1812G0500001326.01	TuG1812G0500001326.01.T02	comp6022_c0_seq1	95.616	365	5	1	1	365	1080	1433	3.11e-163	575	0.530881	0.411128	0.437915	0.309721	0.340032	0.34693	-1.88366	-2.43233	-2.28355	-3.22871	-2.9409	-2.88243
5A	207158757	TuG1812G0500001327.01	TuG1812G0500001327.01.T01	TC407984	99.8	501	0	1	1	500	3111	3611	0	918	0.827289	0.769903	0.666465	0.306835	0.270097	0.487243	-1.20877	-1.29886	-1.50045	-3.25908	-3.70237	-2.05236
5A	207635599	TuG1812G0500001328.01	TuG1812G0500001328.01.T01	TC415249	99.601	501	1	1	1	500	1348	1848	0	913	0.344704	1.44357	3.56755	2.14785	5.94214	3.65432	-2.90104	-0.692728	-0.280305	-0.465583	-0.168289	-0.273648
5A	207635599	TuG1812G0500001328.01	TuG1812G0500001328.01.T01	TC426221	89.409	491	27	24	1	490	1324	1790	2.07e-169	595	0.517056	NA	NA	NA	NA	NA	-1.93403	NA	0	NA	NA	NA
5A	207635599	TuG1812G0500001328.01	TuG1812G0500001328.01.T01	TC447857	99.206	126	1	0	375	500	437	562	2.42e-59	230	NA	NA	NA	0.23865	1.18843	0.913581	0	0	0	-4.19024	-0.841447	-1.09459
5A	207635599	TuG1812G0500001328.01	TuG1812G0500001328.01.T01	comp5380_c0_seq1	99.425	696	4	0	1	696	2314	1619	0	1264	1.14901	1.17578	1.02469	0.786459	0.792286	1.1775	-0.870313	-0.850502	-0.975901	-1.27152	-1.26217	-0.849254
5A	207664790	TuG1812G0500001329.01	TuG1812G0500001329.01.T01	comp4773_c0_seq2	97.696	217	5	0	67	283	498	714	7.25e-103	374	0.612807	0.890888	1.75633	0.536962	1.09335	1.12066	-1.63184	-1.12248	-0.569369	-1.86233	-0.914617	-0.892332
5A	207664790	TuG1812G0500001329.01	TuG1812G0500001329.01.T01	comp4773_c0_seq3	98.039	51	1	0	1	51	664	714	2.08e-17	89.8	0.517056	0.384951	0.137213	0.536962	1.58457	0.406036	-1.93403	-2.59773	-7.28792	-1.86233	-0.631086	-2.46284
5A	207664790	TuG1812G0500001329.01	TuG1812G0500001329.01.T01	comp4773_c0_seq4	98.039	51	1	0	1	51	664	714	1.75e-17	89.8	2.06822	0.769903	NA	0.536962	3.56529	NA	-0.483507	-1.29886	0	-1.86233	-0.280482	NA
5A	207967484	TuG1812G0500001330.01	TuG1812G0500001330.01.T02	TC452767	96.634	505	11	4	1	500	2420	2923	0	833	0.689408	0.649606	1.09771	1.84101	0.891321	1.46173	-1.45052	-1.5394	-0.91099	-0.54318	-1.12193	-0.684121
5A	207967484	TuG1812G0500001330.01	TuG1812G0500001330.01.T01	comp15613_c0_seq1	98.864	88	0	1	16	103	2344	2430	4.07e-37	156	0.764343	0.836274	0.723488	0.696599	1.44678	0.991483	-1.30831	-1.19578	-1.38219	-1.43555	-0.691189	-1.00859
5A	207987570	TuG1812G0500001331.01	TuG1812G0500001331.01.T01	TC453675	98.039	153	3	0	1	153	1294	1446	1.84e-70	267	NA	NA	0.548853	0.536962	3.56529	NA	NA	0	-1.82198	-1.86233	-0.280482	0
5A	207987570	TuG1812G0500001331.01	TuG1812G0500001331.01.T01	comp10377_c0_seq1	99.2	125	1	0	271	395	1566	1442	3.54e-58	226	1.44345	1.22703	0.949059	0.817322	0.699076	1.00059	-0.692786	-0.814974	-1.05368	-1.22351	-1.43046	-0.999412
5A	208293766	TuG1812G0500001332.01	TuG1812G0500001332.01.T01	comp17185_c0_seq1	97.59	249	1	2	1	244	1734	1982	2.11e-117	422	0.517056	0.243127	0.914755	0	0.660238	0.203018	-1.93403	-4.11307	-1.09319	NA	-1.51461	-4.92567
5A	209156394	TuG1812G0500001334.01	TuG1812G0500001334.01.T01	TC405084	98.802	501	4	2	1	500	1727	2226	0	893	1.03411	0.164979	2.19541	0	1.18843	0.609054	-0.967014	-6.06137	-0.455495	NA	-0.841447	-1.64189
5A	209156394	TuG1812G0500001334.01	TuG1812G0500001334.01.T01	comp8064_c0_seq1	99.474	190	0	1	1	189	1872	2061	6.66e-94	344	1.27648	0.925875	0.98392	0.711858	0.858309	1.15964	-0.783404	-1.08006	-1.01634	-1.40478	-1.16508	-0.862337
5A	210060193	TuG1812G0500001336.01	TuG1812G0500001336.01.T01	TC371417	97.009	468	6	8	1	462	845	1310	0	780	1.03411	1.15485	0.274427	0	0	NA	-0.967014	-0.86591	-3.64396	NA	NA	0
5A	210060193	TuG1812G0500001336.01	TuG1812G0500001336.01.T01	TC454286	95.71	373	16	0	1	373	1321	1693	4.45e-171	601	0.517056	3.46456	0.457378	1.4319	1.18843	1.21811	-1.93403	-0.288637	-2.18638	-0.698374	-0.841447	-0.820945
5A	210060193	TuG1812G0500001336.01	TuG1812G0500001336.01.T01	comp17967_c0_seq1	98.361	122	2	0	1	122	1572	1693	4.18e-55	215	1.63281	1.47821	0.886609	0.868278	0.898568	1.04893	-0.612442	-0.676492	-1.12789	-1.1517	-1.11288	-0.953356
5A	210623702	TuG1812G0500001337.01	TuG1812G0500001337.01.T02	TC238625	97.2	500	13	1	1	500	921	1419	0	845	0.856835	0.99958	0.942198	1.29421	0.611192	0.980087	-1.16709	-1.00042	-1.06135	-0.772669	-1.63615	-1.02032
5A	210623702	TuG1812G0500001337.01	TuG1812G0500001337.01.T02	TC25791	86.339	366	50	0	1	366	912	1277	1.74e-110	399	NA	0.577427	NA	NA	NA	NA	0	-1.73182	NA	NA	NA	NA
5A	210623702	TuG1812G0500001337.01	TuG1812G0500001337.01.T02	TC379685	92	450	13	23	1	428	624	1072	5.71e-175	614	NA	NA	NA	NA	1.18843	0	0	NA	NA	0	-0.841447	NA
5A	210623702	TuG1812G0500001337.01	TuG1812G0500001337.01.T02	TC380891	86.164	159	20	2	1	158	1121	1278	1.49e-41	171	2.58528	1.28317	3.01869	0.495657	0.514986	1.00315	-0.386806	-0.779319	-0.331269	-2.01753	-1.9418	-0.996862
5A	210623702	TuG1812G0500001337.01	TuG1812G0500001337.01.T01	TC387265	99.4	500	2	1	1	500	266	764	0	909	NA	NA	NA	NA	NA	1.21811	NA	NA	NA	0	NA	-0.820945
5A	210623702	TuG1812G0500001337.01	TuG1812G0500001337.01.T02	comp1981_c0_seq1	97.602	417	2	2	99	515	1518	1110	0	708	0.898075	0.910812	1.15562	1.18504	0.869308	1.12446	-1.11349	-1.09792	-0.865338	-0.843853	-1.15034	-0.889313
5A	210623702	TuG1812G0500001337.01	TuG1812G0500001337.01.T01	comp3176_c0_seq1	100	54	0	0	34	87	1712	1765	5.63e-21	100	0.265515	0.180446	0.535132	0.5087	0.529873	0.530747	-3.76626	-5.54182	-1.8687	-1.96579	-1.88725	-1.88414
5A	210926606	TuG1812G0500001339.01	TuG1812G0500001339.01.T02	comp18794_c0_seq1	100	48	0	0	190	237	88	41	1.92e-17	89.8	0	0.769903	NA	NA	0.594214	0	NA	-1.29886	0	0	-1.68289	NA
5A	211514647	TuG1812G0500001341.01	TuG1812G0500001341.01.T02	TC244230	95.706	326	14	0	1	326	629	954	2.75e-148	525	1.03411	0.256634	NA	0.715949	3.56529	2.03018	-0.967014	-3.89659	0	-1.39675	-0.280482	-0.492567
5A	211514647	TuG1812G0500001341.01	TuG1812G0500001341.01.T02	TC400249	98.8	500	5	1	1	499	539	1038	0	889	0	0.577427	NA	0	0.396143	0.812072	NA	-1.73182	0	NA	-2.52434	-1.23142
5A	211514647	TuG1812G0500001341.01	TuG1812G0500001341.01.T01	comp11129_c0_seq1	97.761	134	2	1	51	184	987	1119	1.45e-59	230	0.369325	0.481189	0.857583	0.634591	1.54856	1.04409	-2.70764	-2.07818	-1.16607	-1.57582	-0.645762	-0.957769
5A	211514647	TuG1812G0500001341.01	TuG1812G0500001341.01.T02	comp27969_c0_seq1	97.525	202	1	1	1	202	754	951	1.21e-93	342	0.477282	0.494938	2.01246	1.07392	0.813135	1.1166	-2.0952	-2.02046	-0.496904	-0.931165	-1.22981	-0.895577
5A	211642952	TuG1812G0500001343.01	TuG1812G0500001343.01.T01	TC400816	95.984	498	20	0	1	498	638	1135	0	809	NA	NA	NA	1.07392	0.594214	0	NA	0	NA	-0.931165	-1.68289	NA
5A	211644120	TuG1812G0500001344.01	TuG1812G0500001344.01.T01	TC394692	98.6	500	7	0	1	500	132	631	0	885	2.63228	3.17585	1.37213	0.747077	1.1224	1.82716	-0.379898	-0.314876	-0.728792	-1.33855	-0.890944	-0.547297
5A	211764015	TuG1812G0500001347.01	TuG1812G0500001347.01.T02	TC382287	99.558	452	2	0	1	452	3480	3931	0	824	1.96481	1.1729	1.63042	0.677038	0.7973	1.49921	-0.508955	-0.852588	-0.61334	-1.47702	-1.25423	-0.667018
5A	211764015	TuG1812G0500001347.01	TuG1812G0500001347.01.T02	comp24103_c0_seq1	98.291	117	2	0	43	159	3815	3931	2.51e-52	206	1.15577	1.6168	1.60736	0.644354	0.899351	1.44368	-0.865223	-0.618507	-0.62214	-1.55194	-1.11191	-0.692673
5A	212733603	TuG1812G0500001348.01	TuG1812G0500001348.01.T01	CB307326	100	469	0	0	9	477	1231	1699	0	867	NA	NA	0.274427	NA	NA	NA	NA	NA	-3.64396	NA	NA	NA
5A	212733603	TuG1812G0500001348.01	TuG1812G0500001348.01.T01	TC371312	95.483	487	22	0	11	497	1779	2265	0	778	NA	0.384951	NA	0	3.56529	NA	NA	-2.59773	0	NA	-0.280482	0
5A	212745083	TuG1812G0500001349.01	TuG1812G0500001349.01.T01	CA677654	94.42	448	12	13	1	441	661	1102	0	682	1.03411	0.892388	0.658624	0.572759	3.07011	1.12441	-0.967014	-1.12059	-1.51832	-1.74594	-0.325722	-0.889357
5A	212745083	TuG1812G0500001349.01	TuG1812G0500001349.01.T01	TC385682	95.217	460	10	5	1	448	643	1102	0	717	0.689408	1.36483	0.594591	0.826095	0.817045	0.749605	-1.45052	-0.732693	-1.68183	-1.21052	-1.22392	-1.33404
5A	212745083	TuG1812G0500001349.01	TuG1812G0500001349.01.T01	comp1828_c0_seq1	98.142	323	1	2	1	318	780	1102	2.18e-158	558	0.517056	0.515283	0.696995	0.700385	0.759815	0.476545	-1.93403	-1.94068	-1.43473	-1.42779	-1.31611	-2.09844
5A	213387909	TuG1812G0500001353.01	TuG1812G0500001353.01.T01	TC406132	98.416	505	3	1	1	500	156	660	0	883	1.37882	2.69466	1.50935	0.791312	0.938233	0.56845	-0.72526	-0.371104	-0.662538	-1.26372	-1.06583	-1.75917
5A	214004527	TuG1812G0500001355.01	TuG1812G0500001355.01.T01	CA648992	94.272	419	8	16	1	406	672	1087	0	636	NA	NA	NA	2.14785	NA	NA	NA	NA	NA	-0.465583	0	NA
5A	214004527	TuG1812G0500001355.01	TuG1812G0500001355.01.T01	TC240174	94.81	501	21	3	1	498	880	1378	0	776	0.344704	0.164979	0.274427	0	0	0	-2.90104	-6.06137	-3.64396	NA	NA	NA
5A	214004527	TuG1812G0500001355.01	TuG1812G0500001355.01.T01	TC244566	94.779	498	14	11	1	498	463	948	0	765	NA	NA	NA	NA	NA	1.21811	NA	NA	NA	NA	NA	-0.820945
5A	214004527	TuG1812G0500001355.01	TuG1812G0500001355.01.T01	TC378479	99.2	500	2	2	1	500	1019	1516	0	900	0.608301	0.783651	0.640329	0.536962	0.603083	1.21811	-1.64392	-1.27608	-1.5617	-1.86233	-1.65815	-0.820945
5A	214004527	TuG1812G0500001355.01	TuG1812G0500001355.01.T01	TC380158	97.804	501	9	2	1	500	876	1375	0	863	1.03411	0.288714	NA	2.14785	0.792286	0	-0.967014	-3.46364	0	-0.465583	-1.26217	NA
5A	214004527	TuG1812G0500001355.01	TuG1812G0500001355.01.T01	TC451542	98.462	65	1	0	1	65	1296	1360	1.96e-25	117	0.517056	4.61942	1.09771	1.07392	0.848877	0.609054	-1.93403	-0.216477	-0.91099	-0.931165	-1.17803	-1.64189
5A	214004527	TuG1812G0500001355.01	TuG1812G0500001355.01.T01	comp523_c0_seq1	99.538	433	2	0	16	448	1382	950	0	789	0.882434	0.836543	0.611558	0.994799	0.735012	0.984574	-1.13323	-1.1954	-1.63517	-1.00523	-1.36052	-1.01567
5A	214665407	TuG1812G0500001357.01	TuG1812G0500001357.01.T02	TC394821	97.614	503	9	3	1	500	2119	2621	0	859	1.55117	1.15485	NA	3.22177	0.396143	3.65432	-0.644676	-0.86591	0	-0.310388	-2.52434	-0.273648
5A	214665407	TuG1812G0500001357.01	TuG1812G0500001357.01.T03	comp24875_c0_seq1	98.283	233	4	0	2	234	2301	2533	1.28e-113	409	0.954564	1.04987	1.78377	1.1371	2.37686	1.52264	-1.0476	-0.952501	-0.560609	-0.879434	-0.420724	-0.656756
5A	214671159	TuG1812G0500001358.01	TuG1812G0500001358.01.T01	TC396852	98.79	496	6	0	3	498	921	1416	0	883	1.03411	NA	NA	NA	NA	NA	-0.967014	0	NA	NA	0	0
5A	215456810	TuG1812G0500001361.01	TuG1812G0500001361.01.T02	TC427843	100	358	0	0	1	358	589	946	0	662	1.26391	1.96325	0.788976	1.07392	0.772478	1.21811	-0.791193	-0.509359	-1.26746	-0.931165	-1.29453	-0.820945
5A	215456810	TuG1812G0500001361.01	TuG1812G0500001361.01.T01	comp5531_c0_seq3	98.058	103	2	0	1	103	1597	1699	5.21e-45	180	2.06822	NA	1.37213	0	0.396143	0	-0.483507	0	-0.728792	NA	-2.52434	NA
5A	216904427	TuG1812G0500001364.01	TuG1812G0500001364.01.T01	CA605892	96.389	360	11	2	1	360	1432	1789	4.65e-170	597	6.20467	1.15485	0.82328	1.28871	0.396143	1.21811	-0.161169	-0.86591	-1.21465	-0.775971	-2.52434	-0.820945
5A	216904427	TuG1812G0500001364.01	TuG1812G0500001364.01.T01	TC277753	92.516	481	24	4	1	477	1319	1791	0	678	2.06822	1.15485	0.274427	3.22177	0.594214	1.21811	-0.483507	-0.86591	-3.64396	-0.310388	-1.68289	-0.820945
5A	216904427	TuG1812G0500001364.01	TuG1812G0500001364.01.T01	TC398341	99.202	501	3	1	1	500	1283	1783	0	902	0.658071	1.15485	0.548853	0.61367	0.509326	0.913581	-1.51959	-0.86591	-1.82198	-1.62954	-1.96338	-1.09459
5A	216904427	TuG1812G0500001364.01	TuG1812G0500001364.01.T01	comp36328_c0_seq1	98.214	112	2	0	23	134	1468	1579	5.68e-50	196	1.03411	0.577427	0.686067	0.536962	0.792286	1.01509	-0.967014	-1.73182	-1.45758	-1.86233	-1.26217	-0.985134
5A	216904427	TuG1812G0500001364.01	TuG1812G0500001364.01.T01	comp6984_c0_seq1	98.507	201	3	0	192	392	1792	1592	3.04e-97	355	0.969479	0.885916	0.703658	1.05155	0.646425	0.866327	-1.03148	-1.12878	-1.42115	-0.950977	-1.54697	-1.1543
5A	218080047	TuG1812G0500001368.01	TuG1812G0500001368.01.T01	AJ434575	99.551	445	2	0	4	448	3638	4082	0	813	0.827289	1.44357	NA	1.84101	0.432156	1.42113	-1.20877	-0.692728	0	-0.54318	-2.31398	-0.703667
5A	218080047	TuG1812G0500001368.01	TuG1812G0500001368.01.T01	AJ464893	100	238	0	0	3	240	829	1066	4.67e-123	440	1.65458	1.73228	30.5986	8.59138	3.31062	0.763348	-0.604384	-0.577273	-0.0326813	-0.116396	-0.302058	-1.31002
5A	218080047	TuG1812G0500001368.01	TuG1812G0500001368.01.T01	BE034563	96.121	464	16	2	9	470	3654	4117	0	758	NA	1.15485	NA	NA	0	NA	0	-0.86591	NA	NA	NA	NA
5A	218080047	TuG1812G0500001368.01	TuG1812G0500001368.01.T01	BE217028	90.057	352	26	9	1	345	3984	4333	6.13e-125	448	NA	NA	NA	0.715949	0	1.21811	NA	0	0	-1.39675	NA	-0.820945
5A	218080047	TuG1812G0500001368.01	TuG1812G0500001368.01.T01	BF065393	98.718	312	4	0	90	401	6356	6045	2.78e-157	555	1.84663	1.51575	20.0331	0.826095	2.85223	0.539448	-0.541528	-0.659741	-0.0499173	-1.21052	-0.350603	-1.85375
5A	218080047	TuG1812G0500001368.01	TuG1812G0500001368.01.T01	BF267960	87.251	502	42	22	2	500	4219	4701	1.26e-156	553	0	NA	NA	2.14785	0	NA	NA	NA	NA	-0.465583	NA	NA
5A	218080047	TuG1812G0500001368.01	TuG1812G0500001368.01.T01	BF616307	92	450	34	2	1	448	3659	4108	5.05e-180	630	NA	3.46456	0.41164	0	0.594214	1.21811	0	-0.288637	-2.42931	NA	-1.68289	-0.820945
5A	218080047	TuG1812G0500001368.01	TuG1812G0500001368.01.T01	BF616526	88.102	353	31	10	1	350	3840	4184	8.05e-114	411	NA	NA	NA	0.715949	0.594214	1.52264	0	NA	0	-1.39675	-1.68289	-0.656756
5A	218080047	TuG1812G0500001368.01	TuG1812G0500001368.01.T01	BF617231	91.079	482	34	9	4	485	3654	4126	0	643	2.68869	1.25109	0.940891	1.61088	1.32048	1.21811	-0.371928	-0.799301	-1.06282	-0.620777	-0.757303	-0.820945
5A	218080047	TuG1812G0500001368.01	TuG1812G0500001368.01.T01	BF617347	93.772	289	16	2	3	290	3674	3961	1.17e-120	433	7.23878	2.07874	0.82328	0.402721	0.5546	1.04409	-0.138145	-0.481061	-1.21465	-2.48311	-1.8031	-0.957769
5A	218080047	TuG1812G0500001368.01	TuG1812G0500001368.01.T01	BF617375	94.534	494	25	2	1	493	3677	4169	0	761	1.03411	NA	NA	0	0.475371	3.65432	-0.967014	0	0	NA	-2.10362	-0.273648
5A	218080047	TuG1812G0500001368.01	TuG1812G0500001368.01.T01	BF618258	97.674	301	7	0	1	301	3665	3965	1.01e-146	520	NA	NA	NA	NA	2.37686	NA	NA	NA	0	0	-0.420724	NA
5A	218080047	TuG1812G0500001368.01	TuG1812G0500001368.01.T01	BF618785	90.776	477	40	4	1	476	4236	4709	0	634	NA	NA	NA	0	0	0.609054	NA	NA	0	NA	NA	-1.64189
5A	218080047	TuG1812G0500001368.01	TuG1812G0500001368.01.T01	BF618971	94.407	447	23	2	1	446	4287	4732	0	691	1.31849	0.63969	0.640793	1.43619	2.42132	2.23007	-0.758442	-1.56326	-1.56057	-0.696284	-0.412999	-0.448415
5A	218080047	TuG1812G0500001368.01	TuG1812G0500001368.01.T01	BF619384	91.613	465	37	2	1	465	3679	4141	0	647	NA	0	NA	0	NA	1.21811	0	NA	0	NA	0	-0.820945
5A	218080047	TuG1812G0500001368.01	TuG1812G0500001368.01.T01	BF619482	88.889	477	33	18	1	477	3887	4343	1.25e-161	569	NA	NA	NA	0	0.396143	NA	NA	NA	0	NA	-2.52434	NA
5A	218080047	TuG1812G0500001368.01	TuG1812G0500001368.01.T01	BF619666	91.158	475	21	21	1	475	4271	4724	7.34e-179	627	NA	NA	NA	1.4319	4.75371	NA	NA	NA	NA	-0.698374	-0.210362	0
5A	218080047	TuG1812G0500001368.01	TuG1812G0500001368.01.T01	BG299463	91.387	476	40	1	1	476	3925	4399	0	667	NA	NA	0.82328	0	3.56529	0.304527	NA	0	-1.21465	NA	-0.280482	-3.28378
5A	218080047	TuG1812G0500001368.01	TuG1812G0500001368.01.T01	BG299519	91.063	414	33	4	1	413	3857	4267	3.49e-162	571	NA	NA	0.274427	NA	NA	0	NA	NA	-3.64396	NA	0	NA
5A	218080047	TuG1812G0500001368.01	TuG1812G0500001368.01.T01	BG308972	92.569	471	31	4	1	468	3958	4427	0	673	NA	NA	NA	NA	2.37686	NA	NA	NA	NA	NA	-0.420724	NA
5A	218080047	TuG1812G0500001368.01	TuG1812G0500001368.01.T01	BG308973	94.068	472	17	10	19	482	4839	5307	0	708	2.12265	1.27034	10.8856	0.915475	3.1939	0.980087	-0.471109	-0.787191	-0.0918646	-1.09233	-0.313097	-1.02032
5A	218080047	TuG1812G0500001368.01	TuG1812G0500001368.01.T01	BG308989	92.191	397	29	2	1	396	4222	4617	5.9e-159	560	NA	1.73228	NA	1.4319	1.18843	0.913581	0	-0.577273	NA	-0.698374	-0.841447	-1.09459
5A	218080047	TuG1812G0500001368.01	TuG1812G0500001368.01.T01	BG309071	92.2	500	32	6	1	498	3687	4181	0	701	NA	NA	NA	0	1.18843	0.406036	NA	0	0	NA	-0.841447	-2.46284
5A	218080047	TuG1812G0500001368.01	TuG1812G0500001368.01.T01	BG309118	97.173	283	8	0	1	283	4276	4558	4.21e-135	481	NA	NA	NA	2.14785	NA	NA	NA	NA	NA	-0.465583	0	0
5A	218080047	TuG1812G0500001368.01	TuG1812G0500001368.01.T01	BG309161	87.111	450	27	30	1	449	3924	4343	6.05e-135	481	NA	NA	NA	2.14785	0	NA	0	NA	0	-0.465583	NA	NA
5A	218080047	TuG1812G0500001368.01	TuG1812G0500001368.01.T01	BG309169	86.905	504	52	14	1	499	3949	4443	1.26e-156	553	NA	NA	0.274427	0	NA	NA	NA	NA	-3.64396	NA	NA	NA
5A	218080047	TuG1812G0500001368.01	TuG1812G0500001368.01.T01	BG309282	96.532	173	6	0	1	173	3677	3849	8.55e-77	287	0	NA	1.92099	0.477299	0.679102	0.270691	NA	0	-0.520566	-2.09512	-1.47253	-3.69425
5A	218080047	TuG1812G0500001368.01	TuG1812G0500001368.01.T01	BG309291	87.553	474	47	12	1	471	3686	4150	9.84e-153	540	NA	1.53981	0.548853	0.536962	0.509326	0.243622	0	-0.649432	-1.82198	-1.86233	-1.96338	-4.10473
5A	218080047	TuG1812G0500001368.01	TuG1812G0500001368.01.T01	BG309589	88.2	500	40	19	1	500	3942	4422	2.08e-164	579	0	NA	NA	0	2.37686	NA	NA	NA	0	NA	-0.420724	NA
5A	218080047	TuG1812G0500001368.01	TuG1812G0500001368.01.T01	BG309648	89.841	502	37	14	1	492	3872	4369	1.58e-180	632	NA	NA	NA	0	1.18843	NA	NA	NA	NA	NA	-0.841447	NA
5A	218080047	TuG1812G0500001368.01	TuG1812G0500001368.01.T01	BG309716	93.373	498	26	7	1	495	3689	4182	0	730	NA	0	NA	NA	NA	1.21811	NA	NA	NA	NA	NA	-0.820945
5A	218080047	TuG1812G0500001368.01	TuG1812G0500001368.01.T01	BG309832	89.937	477	36	11	1	477	4583	5047	3.44e-172	604	NA	1.15485	0	NA	NA	NA	NA	-0.86591	NA	NA	NA	NA
5A	218080047	TuG1812G0500001368.01	TuG1812G0500001368.01.T01	BG309931	92.009	438	26	9	1	431	3866	4301	2.66e-173	608	NA	0.384951	NA	0.976294	1.32048	2.74074	NA	-2.59773	0	-1.02428	-0.757303	-0.364865
5A	218080047	TuG1812G0500001368.01	TuG1812G0500001368.01.T01	BG309933	94.502	291	13	3	1	289	3879	4168	2.21e-124	446	0	0	0.274427	0	7.13057	0.203018	NA	NA	-3.64396	NA	-0.140241	-4.92567
5A	218080047	TuG1812G0500001368.01	TuG1812G0500001368.01.T01	BG309936	93.548	465	27	3	1	464	3727	4189	0	689	NA	NA	NA	NA	0.594214	NA	NA	NA	0	NA	-1.68289	NA
5A	218080047	TuG1812G0500001368.01	TuG1812G0500001368.01.T01	BG309942	95.856	362	14	1	1	362	3853	4213	4.48e-166	584	NA	0	1.37213	2.14785	1.90149	0.730865	NA	NA	-0.728792	-0.465583	-0.525905	-1.36824
5A	218080047	TuG1812G0500001368.01	TuG1812G0500001368.01.T01	BG309992	88.85	287	19	13	1	283	3758	4035	1.07e-92	340	NA	NA	NA	NA	0.594214	NA	NA	NA	NA	NA	-1.68289	NA
5A	218080047	TuG1812G0500001368.01	TuG1812G0500001368.01.T01	BG310049	94.954	218	9	2	4	221	3656	3871	6.11e-93	340	2.98743	2.35906	1.05132	0.26085	0.761645	2.27976	-0.334736	-0.423897	-0.951181	-3.83363	-1.31295	-0.438642
5A	218080047	TuG1812G0500001368.01	TuG1812G0500001368.01.T01	BG310113	92.665	409	23	7	1	405	3860	4265	1.61e-165	582	0	1.15485	NA	0.357974	1.6638	1.04409	NA	-0.86591	0	-2.7935	-0.601034	-0.957769
5A	218080047	TuG1812G0500001368.01	TuG1812G0500001368.01.T01	BG310132	95.07	284	14	0	10	293	3688	3971	1.66e-125	449	NA	4.04199	0.548853	0.357974	0.891321	0.913581	NA	-0.247403	-1.82198	-2.7935	-1.12193	-1.09459
5A	218080047	TuG1812G0500001368.01	TuG1812G0500001368.01.T01	BG310198	88	500	51	9	1	495	3978	4473	4.48e-166	584	NA	NA	0.548853	0	0.396143	1.82716	0	NA	-1.82198	NA	-2.52434	-0.547297
5A	218080047	TuG1812G0500001368.01	TuG1812G0500001368.01.T01	BG310303	90.31	258	19	6	1	257	4105	4357	1.79e-90	333	NA	NA	NA	NA	2.37686	NA	NA	NA	NA	NA	-0.420724	NA
5A	218080047	TuG1812G0500001368.01	TuG1812G0500001368.01.T01	BG310305	89.919	248	23	2	1	248	4210	4455	5.02e-86	318	NA	NA	NA	2.14785	0	0	0	NA	NA	-0.465583	NA	NA
5A	218080047	TuG1812G0500001368.01	TuG1812G0500001368.01.T01	BM097437	99.203	251	2	0	1	251	690	940	1.09e-126	453	1.21241	0.71068	2.43064	2.65924	1.5541	3.3643	-0.824806	-1.4071	-0.411415	-0.376048	-0.64346	-0.297239
5A	218080047	TuG1812G0500001368.01	TuG1812G0500001368.01.T01	BM334106	97.407	270	7	0	126	395	3908	3639	6.14e-129	460	NA	NA	0.274427	0	0	NA	0	0	-3.64396	NA	NA	NA
5A	218080047	TuG1812G0500001368.01	TuG1812G0500001368.01.T01	BY841253	100	92	0	0	4	95	6611	6702	3.57e-42	171	1.27129	0.805581	3.33232	1.30405	6.74858	0.633416	-0.786601	-1.24134	-0.300091	-0.766842	-0.148179	-1.57874
5A	218080047	TuG1812G0500001368.01	TuG1812G0500001368.01.T01	CA683627	93.035	402	13	15	2	390	3754	4153	4.48e-166	584	4.13645	NA	NA	0.715949	0.792286	0	-0.241753	NA	0	-1.39675	-1.26217	NA
5A	218080047	TuG1812G0500001368.01	TuG1812G0500001368.01.T01	CD234018	98.788	165	2	0	1	165	1185	1349	4.41e-79	294	NA	NA	NA	NA	1.18843	1.21811	NA	0	0	NA	-0.841447	-0.820945
5A	218080047	TuG1812G0500001368.01	TuG1812G0500001368.01.T01	CJ955359	100	68	0	0	1	68	1185	1252	2.19e-28	126	1.03411	0.659917	0.82328	1.61088	0.713057	0.609054	-0.967014	-1.51534	-1.21465	-0.620777	-1.40241	-1.64189
5A	218080047	TuG1812G0500001368.01	TuG1812G0500001368.01.T01	CN010440	100	79	0	0	65	143	4462	4540	2.09e-34	147	0.886381	0.266505	0.334085	2.14785	5.34793	2.27011	-1.12818	-3.75228	-2.99325	-0.465583	-0.186988	-0.440507
5A	218080047	TuG1812G0500001368.01	TuG1812G0500001368.01.T01	CV779850	100	246	0	0	12	257	3639	3884	2.45e-127	455	NA	2.30971	1.92099	0	1.6638	3.65432	0	-0.432955	-0.520566	NA	-0.601034	-0.273648
5A	218080047	TuG1812G0500001368.01	TuG1812G0500001368.01.T01	DN475690	92.83	265	9	8	51	314	3623	3878	2.32e-103	375	1.03411	0	NA	0	NA	NA	-0.967014	NA	0	NA	0	NA
5A	218080047	TuG1812G0500001368.01	TuG1812G0500001368.01.T01	DT696914	100	323	0	0	1	323	3726	4048	5.76e-170	597	NA	NA	0.137213	1.07392	NA	NA	0	NA	-7.28792	-0.931165	0	0
5A	218080047	TuG1812G0500001368.01	TuG1812G0500001368.01.T01	EL773043	93.377	453	6	22	2	433	3645	4094	0	649	NA	NA	NA	NA	1.18843	NA	NA	0	NA	NA	-0.841447	0
5A	218080047	TuG1812G0500001368.01	TuG1812G0500001368.01.T01	EV253946	98.462	195	3	0	1	195	3639	3833	4.41e-94	344	2.67443	2.1264	0.981837	0.262178	0.822325	2.18081	-0.373912	-0.470279	-1.0185	-3.8142	-1.21606	-0.458546
5A	218080047	TuG1812G0500001368.01	TuG1812G0500001368.01.T01	FC868841	93.837	503	22	5	1	500	2361	2857	0	749	1.03411	NA	NA	NA	NA	NA	-0.967014	NA	NA	NA	NA	NA
5A	218080047	TuG1812G0500001368.01	TuG1812G0500001368.01.T01	FL220463	90.596	436	27	14	1	428	3929	4358	1.62e-160	566	NA	NA	NA	0	NA	0.609054	NA	0	0	NA	0	-1.64189
5A	218080047	TuG1812G0500001368.01	TuG1812G0500001368.01.T01	TC130768	98.54	411	6	0	90	500	5674	6084	0	726	0	2.30971	NA	NA	NA	NA	NA	-0.432955	NA	NA	NA	NA
5A	218080047	TuG1812G0500001368.01	TuG1812G0500001368.01.T01	TC131511	98.201	389	6	1	1	389	4103	4490	0	678	NA	NA	0	0	1.18843	NA	NA	NA	NA	NA	-0.841447	NA
5A	218080047	TuG1812G0500001368.01	TuG1812G0500001368.01.T01	TC238845	100	438	0	0	1	438	4736	5173	0	809	2.06822	0.577427	5.48853	0.536962	4.75371	3.24829	-0.483507	-1.73182	-0.182198	-1.86233	-0.210362	-0.307854
5A	218080047	TuG1812G0500001368.01	TuG1812G0500001368.01.T01	TC245100	97.593	457	9	2	43	498	4502	4957	0	782	1.50113	0.747259	3.40289	0.473254	0.826733	0.865033	-0.666165	-1.33822	-0.293868	-2.11303	-1.20958	-1.15602
5A	218080047	TuG1812G0500001368.01	TuG1812G0500001368.01.T01	TC246075	99.6	500	2	0	1	500	2155	2654	0	913	0.893096	0.683621	1.395	1.07392	2.93612	0.96895	-1.1197	-1.4628	-0.716845	-0.931165	-0.340586	-1.03205
5A	218080047	TuG1812G0500001368.01	TuG1812G0500001368.01.T01	TC246370	99.304	431	2	1	59	489	4075	3646	0	780	NA	NA	0.274427	0	0.594214	NA	NA	NA	-3.64396	NA	-1.68289	NA
5A	218080047	TuG1812G0500001368.01	TuG1812G0500001368.01.T01	TC251317	100	444	0	0	1	444	4905	4462	0	821	1.28462	0.568306	0.645044	1.44855	2.56038	2.37706	-0.778439	-1.75961	-1.55028	-0.690347	-0.390568	-0.420689
5A	218080047	TuG1812G0500001368.01	TuG1812G0500001368.01.T01	TC261242	99.353	464	3	0	1	464	6673	6210	0	841	NA	0	NA	NA	NA	1.21811	0	NA	NA	NA	NA	-0.820945
5A	218080047	TuG1812G0500001368.01	TuG1812G0500001368.01.T01	TC261893	98.517	472	2	5	1	472	4619	4153	0	828	1.10261	0.655047	0.60566	1.50935	2.44159	2.274	-0.906936	-1.52661	-1.65109	-0.662536	-0.409569	-0.439754
5A	218080047	TuG1812G0500001368.01	TuG1812G0500001368.01.T01	TC263920	99.399	499	1	2	1	499	6134	5638	0	904	1.27443	0.75557	3.78816	1.76804	2.53979	1.74857	-0.784663	-1.3235	-0.26398	-0.565597	-0.393734	-0.571894
5A	218080047	TuG1812G0500001368.01	TuG1812G0500001368.01.T01	TC265008	93.661	489	23	8	1	489	4341	4821	0	725	NA	1.15485	NA	2.14785	2.37686	NA	0	-0.86591	0	-0.465583	-0.420724	0
5A	218080047	TuG1812G0500001368.01	TuG1812G0500001368.01.T01	TC268438	99.652	287	1	0	1	287	6227	6513	2.24e-148	525	1.2848	1.57408	5.82808	1.87725	1.87752	1.54253	-0.778328	-0.635291	-0.171583	-0.532694	-0.532618	-0.648286
5A	218080047	TuG1812G0500001368.01	TuG1812G0500001368.01.T01	TC270371	90.045	442	35	9	1	438	4272	4708	5.84e-160	564	1.18259	0.62446	0.644931	1.73266	2.69841	2.01374	-0.845602	-1.60138	-1.55055	-0.577146	-0.370588	-0.496589
5A	218080047	TuG1812G0500001368.01	TuG1812G0500001368.01.T01	TC273116	99.038	208	1	1	187	394	3627	3833	3.17e-102	372	10.3411	1.73228	1.07026	0.0767088	0.940839	2.52322	-0.0967014	-0.577273	-0.934349	-13.0363	-1.06288	-0.396318
5A	218080047	TuG1812G0500001368.01	TuG1812G0500001368.01.T01	TC275044	95.187	187	8	1	35	220	3647	3833	4.5e-79	294	1.14138	0.904576	NA	NA	NA	NA	-0.876129	-1.10549	0	0	0	0
5A	218080047	TuG1812G0500001368.01	TuG1812G0500001368.01.T01	TC278524	99.153	354	2	1	1	354	5101	5453	0	636	1.2264	1.17067	1.66236	1.16591	0.858032	1.45988	-0.815396	-0.854208	-0.601553	-0.857697	-1.16546	-0.684987
5A	218080047	TuG1812G0500001368.01	TuG1812G0500001368.01.T01	TC280507	99.795	487	1	0	1	487	1520	1034	0	894	0.965522	1.79447	13.1161	1.42367	1.52868	1.42152	-1.03571	-0.557269	-0.0762422	-0.702411	-0.654157	-0.703474
5A	218080047	TuG1812G0500001368.01	TuG1812G0500001368.01.T01	TC401567	100	314	0	0	1	314	3792	4105	5.8e-165	580	NA	0.577427	0	0	0	0	0	-1.73182	NA	NA	NA	NA
5A	218080047	TuG1812G0500001368.01	TuG1812G0500001368.01.T01	TC423201	100	500	0	0	1	500	6403	6902	0	924	2.58528	0.769903	NA	NA	NA	1.21811	-0.386806	-1.29886	NA	NA	0	-0.820945
5A	218080047	TuG1812G0500001368.01	TuG1812G0500001368.01.T01	TC428313	91.807	415	10	23	1	393	3748	4160	5.84e-160	564	NA	NA	0.274427	0	NA	NA	NA	NA	-3.64396	NA	0	NA
5A	218080047	TuG1812G0500001368.01	TuG1812G0500001368.01.T01	TC433405	99.385	488	2	1	1	488	2993	3479	0	887	NA	0.866141	NA	1.07392	NA	NA	0	-1.15455	0	-0.931165	0	0
5A	218080047	TuG1812G0500001368.01	TuG1812G0500001368.01.T01	TC446852	99.482	193	1	0	9	201	3649	3841	2.79e-96	351	NA	NA	NA	NA	0.594214	NA	NA	0	NA	NA	-1.68289	NA
5A	218080047	TuG1812G0500001368.01	TuG1812G0500001368.01.T01	TC457935	98.225	169	1	2	56	224	797	963	5.73e-79	294	0.689408	0.839894	2.0582	1.07392	1.63409	0.749605	-1.45052	-1.19063	-0.485862	-0.931165	-0.611962	-1.33404
5A	218080047	TuG1812G0500001368.01	TuG1812G0500001368.01.T01	TC75858	96.4	500	17	1	1	500	5630	6128	0	822	NA	NA	0.274427	0	0	NA	NA	NA	-3.64396	NA	NA	NA
5A	218080047	TuG1812G0500001368.01	TuG1812G0500001368.01.T01	comp12584_c0_seq1	91.829	257	18	2	1	255	2292	2547	1.96e-97	355	0.904847	1.15485	NA	NA	NA	NA	-1.10516	-0.86591	0	NA	NA	NA
5A	218080047	TuG1812G0500001368.01	TuG1812G0500001368.01.T01	comp1397_c0_seq1	100	499	0	0	24	522	6299	6797	0	922	1.21508	0.676415	0.82328	1.4319	3.3276	3.58267	-0.822991	-1.47838	-1.21465	-0.698374	-0.300517	-0.279121
5A	218080047	TuG1812G0500001368.01	TuG1812G0500001368.01.T01	comp1397_c0_seq2	99.387	489	3	0	24	512	6299	6787	0	887	1.70628	0.746806	4.66525	0.636399	4.02532	1.04409	-0.586069	-1.33904	-0.214351	-1.57134	-0.248427	-0.957769
5A	218080047	TuG1812G0500001368.01	TuG1812G0500001368.01.T01	comp140_c0_seq2	92.661	218	10	3	1	217	3564	3776	1.23e-83	309	1.12169	0.976059	NA	NA	8.71514	NA	-0.891509	-1.02453	0	0	-0.114743	0
5A	218080047	TuG1812G0500001368.01	TuG1812G0500001368.01.T01	comp140_c0_seq3	100	119	0	0	1	119	3721	3839	3.37e-57	220	2.90844	1.52848	0.556075	0.320574	0.946536	1.46173	-0.343827	-0.654243	-1.79832	-3.1194	-1.05648	-0.684121
5A	218080047	TuG1812G0500001368.01	TuG1812G0500001368.01.T01	comp1797_c0_seq1	96.66	479	12	2	1	475	4103	4581	0	793	0.904847	0.412448	0.93305	1.07392	2.00547	1.92867	-1.10516	-2.42455	-1.07175	-0.931165	-0.498635	-0.518492
5A	218080047	TuG1812G0500001368.01	TuG1812G0500001368.01.T01	comp1797_c0_seq2	100	121	0	0	92	212	4461	4581	4.79e-58	224	2.41293	0.684358	0.403569	1.37462	1.78264	2.55803	-0.414435	-1.46122	-2.47789	-0.727473	-0.560965	-0.390926
5A	218080047	TuG1812G0500001368.01	TuG1812G0500001368.01.T01	comp1797_c0_seq3	100	127	0	0	53	179	4455	4581	1.85e-61	235	1.03411	0.461942	0.20582	1.28871	4.75371	1.82716	-0.967014	-2.16477	-4.85862	-0.775971	-0.210362	-0.547297
5A	218080047	TuG1812G0500001368.01	TuG1812G0500001368.01.T01	comp23497_c0_seq1	100	135	0	0	17	151	3027	2893	4.97e-66	250	1.72352	0.203798	NA	2.14785	0.660238	0.174015	-0.580208	-4.90682	0	-0.465583	-1.51461	-5.74662
5A	218080047	TuG1812G0500001368.01	TuG1812G0500001368.01.T01	comp28060_c0_seq1	100	421	0	0	1	421	790	1210	0	778	1.51139	1.23184	57.1722	1.80419	2.67396	0.866054	-0.661641	-0.811791	-0.017491	-0.554265	-0.373977	-1.15466
5A	218080047	TuG1812G0500001368.01	TuG1812G0500001368.01.T01	comp38503_c0_seq1	100	240	0	0	1	240	2802	2563	3.61e-124	444	0.775583	0.84119	0.914755	0.805442	4.1595	0.553686	-1.28935	-1.18879	-1.09319	-1.24155	-0.240414	-1.80608
5A	218080047	TuG1812G0500001368.01	TuG1812G0500001368.01.T01	comp4802_c0_seq1	94.881	1387	53	11	2	1378	5962	4584	0	2152	1.23053	0.931611	1.89304	1.46264	1.41156	1.00991	-0.812655	-1.07341	-0.528252	-0.683694	-0.708435	-0.990186
5A	218424550	TuG1812G0500001369.01	TuG1812G0500001369.01.T01	comp15748_c0_seq1	90.294	340	16	4	1	332	1102	1432	1.71e-119	429	0.812516	0.240595	0.93305	1.4319	0.933765	1.03539	-1.23074	-4.15637	-1.07175	-0.698374	-1.07093	-0.965818
5A	218457742	TuG1812G0200003161.01	TuG1812G0200003161.01.T01	TC437949	91.61	441	24	12	1	438	1882	2312	2.06e-174	612	1.03411	0.923884	1.09771	1.61088	0.396143	1.21811	-0.967014	-1.08239	-0.91099	-0.620777	-2.52434	-0.820945
5A	219636007	TuG1812G0500001371.01	TuG1812G0500001371.01.T01	TC403583	97.879	330	6	1	1	329	330	1	1.25e-161	569	NA	NA	NA	NA	0.594214	NA	0	NA	NA	NA	-1.68289	NA
5A	219636007	TuG1812G0500001371.01	TuG1812G0500001371.01.T01	comp23840_c0_seq1	100	96	0	0	1	96	96	1	5.26e-44	178	0.723878	1.81477	1.92099	0.631719	3.26818	0.937006	-1.38145	-0.551034	-0.520566	-1.58298	-0.305981	-1.06723
5A	219642612	TuG1812G0500001372.01	TuG1812G0500001372.01.T01	comp16704_c0_seq1	93.023	86	6	0	332	417	170	85	2.69e-28	126	1.55117	0.739107	0.627261	1.14552	0.62005	0.696062	-0.644676	-1.35298	-1.59423	-0.872968	-1.61277	-1.43665
5A	221563012	TuG1812G0500001375.01	TuG1812G0500001375.01.T01	TC446086	93.622	439	12	3	1	425	873	1309	0	641	NA	0	NA	NA	NA	1.21811	NA	NA	0	NA	0	-0.820945
5A	222554748	TuG1812G0500001378.01	TuG1812G0500001378.01.T01	TC245846	93.952	496	20	5	3	491	1287	1779	0	741	0	1.15485	NA	1.07392	0	0	NA	-0.86591	NA	-0.931165	NA	NA
5A	222554748	TuG1812G0500001378.01	TuG1812G0500001378.01.T01	TC393684	96.531	490	16	1	1	489	1396	1885	0	809	1.22213	0.425473	0.224531	0.306835	0.67172	1.0748	-0.818243	-2.35033	-4.45373	-3.25908	-1.48871	-0.930405
5A	222554748	TuG1812G0500001378.01	TuG1812G0500001378.01.T01	comp20955_c0_seq1	99.58	238	1	0	1	238	1705	1942	2.26e-121	435	1.73214	1.18985	1.07026	0.820087	0.656465	0.796455	-0.577322	-0.840442	-0.934349	-1.21938	-1.52331	-1.25556
5A	222659858	TuG1812G0500001379.01	TuG1812G0500001379.01.T01	TC415465	98.978	489	5	0	1	489	555	1043	0	876	1.85051	1.22936	1.27234	1.14552	1.27985	1.65034	-0.54039	-0.813431	-0.785953	-0.872968	-0.781344	-0.605936
5A	222659858	TuG1812G0500001379.01	TuG1812G0500001379.01.T01	comp13428_c0_seq1	99.517	207	1	0	1	207	903	1109	3.68e-104	377	1.64241	1.64979	1.01327	0.998998	1.70341	1.42113	-0.608861	-0.606137	-0.986906	-1.001	-0.587056	-0.703667
5A	223878969	TuG1812G0500001381.01	TuG1812G0500001381.01.T01	comp17498_c0_seq1	89.922	129	13	0	2	130	377	505	1.58e-40	167	1.30987	0.600524	0.92619	0.596624	0.815588	0.673165	-0.763432	-1.66521	-1.07969	-1.6761	-1.22611	-1.48552
5A	224594231	TuG1812G0500001383.01	TuG1812G0500001383.01.T05	CJ657697	100	342	0	0	1	342	1602	1943	1.05e-180	632	NA	NA	0.274427	NA	NA	NA	NA	NA	-3.64396	NA	0	NA
5A	224594231	TuG1812G0500001383.01	TuG1812G0500001383.01.T01	TC279237	94.894	470	20	2	1	467	1513	1981	0	732	1.37882	2.09585	1.95148	1.1371	1.23694	1.89798	-0.72526	-0.477134	-0.512432	-0.879434	-0.808449	-0.526875
5A	224594231	TuG1812G0500001383.01	TuG1812G0500001383.01.T01	TC415011	95.238	504	16	4	1	500	1483	1982	0	791	0.689408	3.46456	NA	0.715949	2.37686	1.70535	-1.45052	-0.288637	0	-1.39675	-0.420724	-0.586389
5A	224594231	TuG1812G0500001383.01	TuG1812G0500001383.01.T05	comp16676_c0_seq1	88.571	175	0	1	1	175	3084	3238	4.59e-49	195	0.861759	1.15485	3.01869	1.4319	1.27985	1.94897	-1.16042	-0.86591	-0.331269	-0.698374	-0.781344	-0.513091
5A	224594231	TuG1812G0500001383.01	TuG1812G0500001383.01.T05	comp8131_c0_seq1	99.338	453	3	0	26	478	2042	1590	0	821	1.23325	1.11751	1.20286	0.932676	0.937513	1.18051	-0.810867	-0.894848	-0.831352	-1.07218	-1.06665	-0.84709
5A	224599173	TuG1812G0500001384.01	TuG1812G0500001384.01.T01	TC246057	96.62	503	11	6	1	500	447	946	0	830	NA	NA	NA	2.14785	NA	0	NA	NA	NA	-0.465583	NA	NA
5A	224599173	TuG1812G0500001384.01	TuG1812G0500001384.01.T01	TC248291	93.776	482	23	4	1	479	1116	1593	0	717	0.620467	0.577427	0.365902	1.07392	1.01865	1.21811	-1.61169	-1.73182	-2.73297	-0.931165	-0.981689	-0.820945
5A	224599173	TuG1812G0500001384.01	TuG1812G0500001384.01.T01	TC449743	91.04	346	19	12	1	334	1136	1481	2.19e-129	462	NA	NA	NA	0	0	1.21811	NA	NA	0	NA	NA	-0.820945
5A	224599173	TuG1812G0500001384.01	TuG1812G0500001384.01.T01	comp640_c0_seq1	99.502	402	2	0	1	402	1197	1598	0	732	0.719912	0.698375	1.09943	0.86555	1.00503	0.908564	-1.38906	-1.4319	-0.90956	-1.15533	-0.994996	-1.10064
5A	224603912	TuG1812G0500001385.01	TuG1812G0500001385.01.T01	TC387087	98.397	499	5	3	1	497	382	879	0	874	0	NA	NA	1.07392	NA	NA	NA	0	0	-0.931165	NA	NA
5A	224603912	TuG1812G0500001385.01	TuG1812G0500001385.01.T02	TC429363	98.721	391	5	0	1	391	1164	1554	0	695	1.43627	1.87664	1.55508	0.644354	0.608707	0.992533	-0.69625	-0.532868	-0.643052	-1.55194	-1.64283	-1.00752
5A	224603912	TuG1812G0500001385.01	TuG1812G0500001385.01.T01	comp6932_c0_seq1	94.236	347	18	2	8	353	1073	1418	1.64e-149	529	1.80307	1.76978	0.675512	0.667366	0.537078	1.29138	-0.554611	-0.565043	-1.48036	-1.49843	-1.86193	-0.774367
5A	225083422	TuG1812G0500001386.01	TuG1812G0500001386.01.T01	TC386483	99.398	498	3	0	1	498	2427	2924	0	904	1.37882	0.815191	8.78165	0.805442	0.41595	0.941265	-0.72526	-1.22671	-0.113874	-1.24155	-2.40414	-1.0624
5A	225083422	TuG1812G0500001386.01	TuG1812G0500001386.01.T01	TC421310	98.6	500	7	0	1	500	1455	1954	0	887	1.77276	0.824896	4.39083	0.536962	0.990357	0.580051	-0.564091	-1.21227	-0.227748	-1.86233	-1.00974	-1.72398
5A	225608999	TuG1812G0500001388.01	TuG1812G0500001388.01.T02	TC260061	95.547	494	21	1	7	500	494	986	0	789	0.669988	0.876261	2.42672	1.91908	3.10457	0.898674	-1.49256	-1.14121	-0.41208	-0.521083	-0.322105	-1.11275
5A	225608999	TuG1812G0500001388.01	TuG1812G0500001388.01.T02	TC429436	91.235	502	25	18	1	500	411	895	0	665	0	0.577427	NA	0	NA	NA	NA	-1.73182	0	NA	0	NA
5A	225608999	TuG1812G0500001388.01	TuG1812G0500001388.01.T02	TC436205	97.8	500	11	0	1	500	459	958	0	863	0.517056	0.577427	0.82328	NA	2.37686	0	-1.93403	-1.73182	-1.21465	0	-0.420724	NA
5A	225608999	TuG1812G0500001388.01	TuG1812G0500001388.01.T01	TC457191	94.98	498	9	15	1	498	580	1061	0	767	0.722192	0.783139	2.20848	1.83412	2.83994	0.98404	-1.38467	-1.27691	-0.4528	-0.545222	-0.35212	-1.01622
5A	225608999	TuG1812G0500001388.01	TuG1812G0500001388.01.T01	comp1417_c0_seq1	98.936	282	2	1	42	322	880	1161	8.56e-142	503	0.798621	0.994692	1.70754	1.6549	4.04066	1.56389	-1.25216	-1.00534	-0.585637	-0.604267	-0.247485	-0.63943
5A	225608999	TuG1812G0500001388.01	TuG1812G0500001388.01.T01	comp1417_c0_seq2	98.907	183	2	0	42	224	880	1062	3.83e-89	327	0.67442	0.563679	5.62575	0.536962	1.6506	0.862827	-1.48275	-1.77406	-0.177754	-1.86233	-0.605842	-1.15898
5A	225610893	TuG1812G0500001389.01	TuG1812G0500001389.01.T01	TC245343	92.2	500	29	9	1	495	244	738	0	699	0	1.15485	NA	NA	1.18843	NA	NA	-0.86591	NA	0	-0.841447	NA
5A	225610893	TuG1812G0500001389.01	TuG1812G0500001389.01.T01	TC397614	93.061	490	20	3	1	477	328	816	0	704	0.258528	0.989875	0.274427	1.07392	2.97107	0	-3.86806	-1.01023	-3.64396	-0.931165	-0.336579	NA
5A	225610893	TuG1812G0500001389.01	TuG1812G0500001389.01.T01	comp891_c0_seq1	98.886	359	4	0	154	512	885	527	0	641	0.564168	0.598559	1.44199	1.04031	1.36947	0.967187	-1.77252	-1.67068	-0.693488	-0.961249	-0.730211	-1.03393
5A	226697397	TuG1812G0500001397.01	TuG1812G0500001397.01.T01	comp5762_c0_seq1	98.718	156	2	0	1	156	1036	1191	6.35e-74	278	1.2166	1.05323	1.0532	0.746578	1.21564	0.93866	-0.821962	-0.949463	-0.949483	-1.33945	-0.822609	-1.06535
5A	226793132	TuG1812G0500001398.01	TuG1812G0500001398.01.T01	comp42179_c0_seq1	97.753	178	2	1	1	176	671	848	1.25e-82	305	1.03411	2.30971	NA	0	0	0	-0.967014	-0.432955	0	NA	NA	NA
5A	227222877	TuG1812G0500001399.01	TuG1812G0500001399.01.T01	comp11227_c0_seq1	94.35	177	10	0	1	177	100	276	3.03e-72	272	1.03411	0.845015	1.0634	0.795499	0.69325	0.982345	-0.967014	-1.18341	-0.940377	-1.25707	-1.44248	-1.01797
5A	227598495	TuG1812G0500001400.01	TuG1812G0500001400.01.T01	TC382019	98.361	488	8	0	1	488	2223	2710	0	857	1.03411	1.00584	1.26922	0.887154	1.01366	1.39212	-0.967014	-0.994193	-0.787884	-1.1272	-0.986525	-0.718327
5A	227669463	TuG1812G0500001402.01	TuG1812G0500001402.01.T01	comp17369_c0_seq1	84.366	339	42	5	1	329	154	491	2.65e-87	322	1.50416	0.879889	0.748436	0.960879	0.726262	1.0789	-0.664822	-1.13651	-1.33612	-1.04071	-1.37691	-0.926874
5A	229747956	TuG1812G0500001404.01	TuG1812G0500001404.01.T01	comp7736_c0_seq1	100	251	0	0	575	825	1421	1171	1.02e-129	464	1.29264	1.23734	1.4819	1.32962	0.695665	1.21811	-0.773611	-0.808183	-0.674808	-0.752095	-1.43747	-0.820945
5A	231770988	TuG1812G0500001406.01	TuG1812G0500001406.01.T01	TC268541	93.127	291	18	1	15	305	1262	1550	2.87e-118	425	1.75799	1.71578	0.848228	1.1626	0.808621	1.05815	-0.568832	-0.582824	-1.17893	-0.860144	-1.23667	-0.945042
5A	231770988	TuG1812G0500001406.01	TuG1812G0500001406.01.T01	TC380750	98.039	459	9	0	2	460	1147	1605	0	798	1.92049	2.30971	0.648645	0.859138	0.275885	0.928082	-0.5207	-0.432955	-1.54168	-1.16396	-3.6247	-1.07749
5A	231770988	TuG1812G0500001406.01	TuG1812G0500001406.01.T01	TC435646	91.979	374	19	11	1	366	955	1325	9.91e-148	523	NA	NA	NA	NA	NA	0.609054	NA	NA	0	NA	NA	-1.64189
5A	231770988	TuG1812G0500001406.01	TuG1812G0500001406.01.T01	TC439517	96.101	436	11	6	1	432	1064	1497	0	708	1.55117	1.15485	NA	0.715949	1.18843	NA	-0.644676	-0.86591	0	-1.39675	-0.841447	0
5A	231813788	TuG1812G0500001408.01	TuG1812G0500001408.01.T01	comp24372_c0_seq1	94.545	220	12	0	1	220	86	305	5.21e-93	340	2.27504	0.230971	0.548853	0.536962	1.18843	0.348031	-0.439552	-4.32955	-1.82198	-1.86233	-0.841447	-2.87331
5A	232645792	TuG1812G0500001411.01	TuG1812G0500001411.01.T01	TC453176	99.8	500	1	0	1	500	1973	2472	0	918	0.775583	0.192476	0.365902	1.61088	1.33698	0.541381	-1.28935	-5.19546	-2.73297	-0.620777	-0.747953	-1.84713
5A	232648606	TuG1812G0500001412.01	TuG1812G0500001412.01.T01	CA660384	94.071	506	19	11	1	498	2133	1631	0	769	1.21877	1.51019	0.598749	0.590658	1.14441	1.49921	-0.820497	-0.662166	-1.67015	-1.69303	-0.873811	-0.667018
5A	232648606	TuG1812G0500001412.01	TuG1812G0500001412.01.T01	TC243803	95.6	500	21	1	1	500	1675	2173	0	800	1.29264	1.53981	0.548853	1.07392	0.891321	1.21811	-0.773611	-0.649432	-1.82198	-0.931165	-1.12193	-0.820945
5A	233947934	TuG1812G0500001414.01	TuG1812G0500001414.01.T01	TC451387	98.165	327	4	1	1	327	2187	2511	1.25e-161	569	1.24093	1.20735	1.41134	0.847834	0.696665	0.800471	-0.805845	-0.828262	-0.708548	-1.17948	-1.43541	-1.24926
5A	233947934	TuG1812G0500001414.01	TuG1812G0500001414.01.T01	comp3148_c0_seq1	99.113	451	2	1	6	456	2778	2330	0	809	0.997179	0.856828	1.06093	0.762439	0.691855	1.01657	-1.00283	-1.1671	-0.942571	-1.31158	-1.44539	-0.983698
5A	237931830	TuG1812G0500001419.01	TuG1812G0500001419.01.T01	TC376958	99.601	501	1	1	1	500	1960	2460	0	913	1.4773	1.44357	1.92099	1.82567	1.9312	2.15511	-0.67691	-0.692728	-0.520566	-0.547744	-0.517814	-0.464012
5A	237931830	TuG1812G0500001419.01	TuG1812G0500001419.01.T01	comp8108_c0_seq1	99.191	371	1	1	31	401	2472	2104	0	667	1.10516	1.19309	0.669601	0.633339	0.664274	0.776855	-0.904849	-0.838156	-1.49343	-1.57893	-1.5054	-1.28724
5A	238181418	TuG1812G0500001421.01	TuG1812G0500001421.01.T01	TC451814	99.598	497	2	0	1	497	2301	2797	0	907	2.21595	1.33252	0.623697	0.920505	0.990357	0.992533	-0.451273	-0.750455	-1.60334	-1.08636	-1.00974	-1.00752
5A	238181418	TuG1812G0500001421.01	TuG1812G0500001421.01.T01	comp21129_c0_seq1	97.987	149	0	1	2	147	2617	2765	1.33e-67	255	3.61939	2.09974	1.23492	0.644354	1.78264	1.33992	-0.27629	-0.47625	-0.809769	-1.55194	-0.560965	-0.746314
5A	239198799	TuG1812G0500001422.01	TuG1812G0500001422.01.T01	TC382283	99.6	500	1	1	1	500	3069	3567	0	911	NA	2.30971	0.82328	0	NA	1.21811	0	-0.432955	-1.21465	NA	NA	-0.820945
5A	239198799	TuG1812G0500001422.01	TuG1812G0500001422.01.T01	TC402745	97.6	375	6	1	1	375	3127	3498	0	640	4.13645	0.461942	0.686067	0.268481	0.475371	1.62414	-0.241753	-2.16477	-1.45758	-3.72466	-2.10362	-0.615709
5A	239756299	TuG1812G0500001423.01	TuG1812G0500001423.01.T01	CK205695	90.543	497	35	12	1	491	1231	741	0	647	0.413645	0.43307	0.82328	0.322177	0.66552	0.730865	-2.41753	-2.30909	-1.21465	-3.10388	-1.50258	-1.36824
5A	239756299	TuG1812G0500001423.01	TuG1812G0500001423.01.T01	DR736470	95.054	465	17	6	1	460	718	1181	0	726	0	NA	NA	NA	1.18843	NA	NA	NA	NA	NA	-0.841447	0
5A	239756299	TuG1812G0500001423.01	TuG1812G0500001423.01.T02	comp20647_c0_seq1	95.639	321	14	0	1	321	866	1186	1.04e-145	516	1.29264	1.15485	3.56755	1.53418	1.18843	0.913581	-0.773611	-0.86591	-0.280305	-0.651816	-0.841447	-1.09459
5A	241040729	TuG1812G0500001424.01	TuG1812G0500001424.01.T01	TC379147	100	71	0	0	174	244	1619	1689	7.02e-30	132	1.62503	0.53301	1.78377	0.715949	0.633828	1.15044	-0.615372	-1.87614	-0.560609	-1.39675	-1.57771	-0.869236
5A	241040729	TuG1812G0500001424.01	TuG1812G0500001424.01.T01	TC387938	97.744	133	3	0	66	198	1347	1479	2.42e-59	230	1.72352	2.021	0.41164	0	0.639923	0.730865	-0.580208	-0.494806	-2.42931	NA	-1.56269	-1.36824
5A	242323018	TuG1812G0500001425.01	TuG1812G0500001425.01.T02	TC389860	94.503	473	15	8	30	493	1641	2111	0	719	1.03411	0.742406	1.37213	0.268481	1.29647	1.21811	-0.967014	-1.34697	-0.728792	-3.72466	-0.771327	-0.820945
5A	242323018	TuG1812G0500001425.01	TuG1812G0500001425.01.T01	comp4738_c0_seq1	97.21	466	9	2	33	496	2428	1965	0	785	0.935936	0.877508	0.951583	1.08608	1.00749	1.11901	-1.06845	-1.13959	-1.05088	-0.920742	-0.992564	-0.893649
5A	242626120	TuG1812G0500001426.01	TuG1812G0500001426.01.T02	TC427655	99.562	457	2	0	6	462	579	1035	0	833	4.13645	1.34733	4.66525	0.390517	1.78264	1.46173	-0.241753	-0.742209	-0.214351	-2.5607	-0.560965	-0.684121
5A	242626120	TuG1812G0500001426.01	TuG1812G0500001426.01.T01	comp4069_c0_seq1	99.765	425	1	0	18	442	856	432	0	780	1.16966	0.897074	1.14502	0.500892	0.807971	0.861389	-0.854949	-1.11473	-0.873346	-1.99644	-1.23767	-1.16092
5A	243648927	TuG1812G0500001428.01	TuG1812G0500001428.01.T01	TC385120	93.281	506	24	4	1	500	1416	1917	0	737	0	1.15485	NA	0	0	0	NA	-0.86591	0	NA	NA	NA
5A	243648927	TuG1812G0500001428.01	TuG1812G0500001428.01.T01	TC389576	99.399	499	3	0	1	499	1437	1935	0	905	2.32675	0.659917	0.82328	0.585776	0.594214	0.243622	-0.429784	-1.51534	-1.21465	-1.70714	-1.68289	-4.10473
5A	243648927	TuG1812G0500001428.01	TuG1812G0500001428.01.T01	comp6639_c0_seq1	99.729	369	1	0	111	479	1956	1588	0	676	1.42776	1.39687	0.973187	0.742343	0.761813	1.04695	-0.700397	-0.715884	-1.02755	-1.34709	-1.31266	-0.955152
5A	244095174	TuG1812G0500001433.01	TuG1812G0500001433.01.T01	comp6382_c0_seq1	96.296	243	4	1	7	244	1476	1718	4.73e-109	394	2.45382	1.62441	0.630165	0.958108	0.700324	0.738724	-0.407527	-0.615608	-1.58689	-1.04372	-1.42791	-1.35369
5A	244367694	TuG1812G0500001434.01	TuG1812G0500001434.01.T01	TC393755	100	470	0	0	1	470	960	1429	0	869	NA	2.30971	NA	0	NA	1.21811	0	-0.432955	NA	NA	NA	-0.820945
5A	244367694	TuG1812G0500001434.01	TuG1812G0500001434.01.T02	comp39478_c0_seq1	99.286	140	1	0	1	140	539	678	3.51e-67	254	4.48115	0.6686	0.960493	1.57509	0.858309	1.28578	-0.223157	-1.49566	-1.04113	-0.634885	-1.16508	-0.777738
5A	244455207	TuG1812G0500001435.01	TuG1812G0500001435.01.T01	TC390951	99.6	500	2	0	1	500	890	1389	0	913	0.89623	1.15485	2.01246	0.678267	1.18843	2.65769	-1.11579	-0.86591	-0.496904	-1.47435	-0.841447	-0.376267
5A	244455207	TuG1812G0500001435.01	TuG1812G0500001435.01.T01	comp10869_c0_seq1	97.902	143	3	0	125	267	1440	1298	3.4e-65	248	2.22732	1.33059	1.12384	0.402721	0.760041	1.57339	-0.448971	-0.751544	-0.889805	-2.48311	-1.31572	-0.63557
5A	244993711	TuG1812G0500001438.01	TuG1812G0500001438.01.T01	TC260984	91.525	472	23	4	1	470	2684	3140	0	634	0	3.46456	NA	NA	0	NA	NA	-0.288637	0	0	NA	NA
5A	244993711	TuG1812G0500001438.01	TuG1812G0500001438.01.T01	TC393170	98.4	500	8	0	1	500	2637	3136	0	880	2.58528	1.15485	0.82328	3.43655	2.61454	0.655904	-0.386806	-0.86591	-1.21465	-0.290989	-0.382476	-1.52461
5A	244993711	TuG1812G0500001438.01	TuG1812G0500001438.01.T01	comp22529_c0_seq1	98.739	238	3	0	1	238	2740	2977	4.66e-118	424	0.29546	1.73228	0.274427	0.214785	0.950743	0.974487	-3.38455	-0.577273	-3.64396	-4.65583	-1.05181	-1.02618
5A	245414665	TuG1812G0500001440.01	TuG1812G0500001440.01.T01	TC274870	92.338	509	23	9	1	496	1150	1655	0	710	2.06822	1.31983	1.78377	1.3424	1.18843	1.82716	-0.483507	-0.757671	-0.560609	-0.744932	-0.841447	-0.547297
5A	245414665	TuG1812G0500001440.01	TuG1812G0500001440.01.T01	TC413388	97.6	500	12	0	1	500	873	1372	0	869	NA	0	NA	NA	NA	1.21811	NA	NA	0	0	NA	-0.820945
5A	245414665	TuG1812G0500001440.01	TuG1812G0500001440.01.T01	comp7648_c0_seq1	97.423	388	4	2	1	384	1287	1672	0	656	1.01934	0.982222	0.82328	0.682149	0.939543	0.961123	-0.981029	-1.0181	-1.21465	-1.46596	-1.06435	-1.04045
5A	247068613	TuG1812G0500001443.01	TuG1812G0500001443.01.T01	TC373594	99.203	502	1	2	1	500	2120	2620	0	902	2.06822	3.00262	0.705668	0.626455	0.908798	0.947417	-0.483507	-0.333042	-1.4171	-1.59628	-1.10035	-1.0555
5A	247306999	TuG1812G0500001444.01	TuG1812G0500001444.01.T01	comp24897_c0_seq1	97.917	96	2	0	8	103	397	492	1.18e-40	167	4.00718	11.5485	1.38928	12.8871	6.62124	10.3539	-0.249552	-0.086591	-0.719795	-0.0775971	-0.151029	-0.0965818
5A	248394470	TuG1812G0500001445.01	TuG1812G0500001445.01.T01	TC272432	92.8	500	25	3	1	499	920	1409	0	713	NA	1.15485	0.548853	NA	0	NA	0	-0.86591	-1.82198	0	NA	0
5A	248394470	TuG1812G0500001445.01	TuG1812G0500001445.01.T01	TC372191	100	451	0	0	1	451	969	1419	0	833	1.94798	1.95823	1.02148	0.585776	1.03437	2.46667	-0.513353	-0.510665	-0.978975	-1.70714	-0.966769	-0.405405
5A	248394470	TuG1812G0500001445.01	TuG1812G0500001445.01.T01	comp9442_c0_seq1	99.377	321	2	0	20	340	1239	1559	1.07e-165	582	1.85718	1.72807	1.05466	0.810707	0.881939	1.79776	-0.538451	-0.578681	-0.948174	-1.23349	-1.13387	-0.556248
5A	249123040	TuG1812G0500001448.01	TuG1812G0500001448.01.T01	TC268010	89.587	509	40	7	1	500	1421	1925	0	634	1.03411	NA	NA	0	NA	NA	-0.967014	NA	NA	NA	0	NA
5A	249123040	TuG1812G0500001448.01	TuG1812G0500001448.01.T01	TC404716	96.26	508	9	3	1	500	1444	1949	0	824	NA	36.9553	17.5633	70.8789	30.8991	21.3169	0	-0.0270597	-0.0569369	-0.0141086	-0.0323634	-0.0469112
5A	249123040	TuG1812G0500001448.01	TuG1812G0500001448.01.T01	comp30196_c0_seq1	98.907	183	1	1	1	183	1583	1764	1.03e-88	326	1.55117	0	NA	1.07392	0.396143	1.82716	-0.644676	NA	0	-0.931165	-2.52434	-0.547297
5A	249123040	TuG1812G0500001448.01	TuG1812G0500001448.01.T01	comp5502_c0_seq1	93.103	203	3	2	1	192	1751	1953	5.57e-77	287	0.425811	0.227932	0.41164	0.191772	0.293769	0.225085	-2.34846	-4.38728	-2.42931	-5.21453	-3.40404	-4.44276
5A	249278031	TuG1812G0500001450.01	TuG1812G0500001450.01.T01	CA638214	92.137	496	10	28	1	467	807	1302	0	676	NA	NA	NA	0	0.594214	1.21811	0	NA	0	NA	-1.68289	-0.820945
5A	249278031	TuG1812G0500001450.01	TuG1812G0500001450.01.T01	CA677159	90.891	505	29	17	1	494	673	1171	0	686	NA	0.866141	NA	0	1.06959	0.487243	0	-1.15455	0	NA	-0.934942	-2.05236
5A	249278031	TuG1812G0500001450.01	TuG1812G0500001450.01.T01	CB882463	97.746	355	8	0	1	355	166	520	2.06e-174	612	1.03411	3.46456	NA	0.357974	0.475371	2.43622	-0.967014	-0.288637	0	-2.7935	-2.10362	-0.410473
5A	249278031	TuG1812G0500001450.01	TuG1812G0500001450.01.T01	CJ539790	100	69	0	0	432	500	519	587	9.08e-29	128	NA	NA	NA	NA	1.18843	NA	NA	NA	0	NA	-0.841447	0
5A	249278031	TuG1812G0500001450.01	TuG1812G0500001450.01.T01	comp1707_c0_seq1	97.727	396	4	2	29	420	1175	1569	0	676	1.08212	0.892312	0.921289	0.555939	0.956246	0.628903	-0.924115	-1.12068	-1.08544	-1.79876	-1.04576	-1.59007
5A	249283671	TuG1812G0500001451.01	TuG1812G0500001451.01.T01	comp9632_c0_seq1	98.047	512	9	1	1	512	201	711	0	889	1.26762	1.13709	0.903994	0.814103	0.468676	1.10098	-0.78888	-0.87944	-1.1062	-1.22835	-2.13367	-0.90828
5A	249283671	TuG1812G0500001451.01	TuG1812G0500001451.01.T01	comp9632_c0_seq3	97.872	94	2	0	1	94	201	294	1.08e-39	163	0.886381	1.92476	0.640329	0	0.139815	0.974487	-1.12818	-0.519546	-1.5617	NA	-7.1523	-1.02618
5A	249313432	TuG1812G0500001452.01	TuG1812G0500001452.01.T01	CD875587	97.405	501	10	3	1	499	187	686	0	850	NA	1.15485	NA	0	0	0	0	-0.86591	NA	NA	NA	NA
5A	249313432	TuG1812G0500001452.01	TuG1812G0500001452.01.T01	comp3304_c0_seq1	96.939	196	6	0	1	196	875	1070	9.91e-90	329	1.03411	1.03641	1.6923	0.971645	1.75887	0.961664	-0.967014	-0.964871	-0.590913	-1.02918	-0.568546	-1.03986
5A	249655548	TuG1812G0500001454.01	TuG1812G0500001454.01.T02	comp35941_c0_seq1	95.349	129	6	0	1	129	2141	2269	9.02e-53	206	0	1.15485	0.274427	0	NA	0.609054	NA	-0.86591	-3.64396	NA	0	-1.64189
5A	249768729	TuG1812G0500001455.01	TuG1812G0500001455.01.T03	TC240924	93.939	495	27	3	1	492	497	991	0	745	1.68043	2.11723	1.92099	1.28871	1.84867	2.43622	-0.595085	-0.472315	-0.520566	-0.775971	-0.54093	-0.410473
5A	251523656	TuG1812G0500001456.01	TuG1812G0500001456.01.T01	CA640665	96.885	321	6	4	114	431	1	320	1.21e-151	536	NA	NA	9.3305	NA	8.319	51.1605	0	0	-0.107175	0	-0.120207	-0.0195463
5A	251624188	TuG1812G0500001457.01	TuG1812G0500001457.01.T01	TC445464	97.426	505	4	9	1	500	168	668	0	852	1.29264	2.69466	NA	1.4319	1.58457	0.974487	-0.773611	-0.371104	0	-0.698374	-0.631086	-1.02618
5A	252595633	TuG1812G0500001459.01	TuG1812G0500001459.01.T01	DR738575	93.046	417	12	17	1	417	486	885	2.07e-169	595	NA	1.15485	NA	0	0	NA	NA	-0.86591	0	NA	NA	NA
5A	252595633	TuG1812G0500001459.01	TuG1812G0500001459.01.T02	TC241328	90.398	427	20	7	1	418	979	1393	2.74e-153	542	1.03411	0.577427	NA	0	NA	NA	-0.967014	-1.73182	0	NA	NA	NA
5A	252595633	TuG1812G0500001459.01	TuG1812G0500001459.01.T02	TC376072	99.551	445	2	0	1	445	939	1383	0	811	1.94798	1.43812	1.31374	0.805442	0.860335	1.24067	-0.513353	-0.695352	-0.761183	-1.24155	-1.16234	-0.806019
5A	252595633	TuG1812G0500001459.01	TuG1812G0500001459.01.T02	comp7371_c0_seq1	99.671	304	1	0	1	304	1219	1522	5.76e-158	556	1.81753	1.39399	1.70567	0.771022	1.02179	1.01699	-0.550198	-0.717365	-0.586281	-1.29698	-0.978679	-0.983296
5A	253046280	TuG1812G0500001461.01	TuG1812G0500001461.01.T01	TC246825	90.816	490	36	5	1	489	1818	2299	0	647	1.03411	NA	NA	NA	NA	NA	-0.967014	NA	NA	NA	NA	NA
5A	253554341	TuG1812G0500001463.01	TuG1812G0500001463.01.T01	TC262556	94.681	470	23	2	28	497	2429	2896	0	728	1.31614	1.51955	0.731804	0.383544	0.565918	0.897553	-0.759797	-0.658092	-1.36649	-2.60726	-1.76704	-1.11414
5A	253554341	TuG1812G0500001463.01	TuG1812G0500001463.01.T01	comp12572_c0_seq1	98.947	190	2	0	1	190	2749	2938	4.94e-93	340	1.33573	1.30387	1.0585	0.592509	0.997431	1.24711	-0.748656	-0.766949	-0.944731	-1.68774	-1.00258	-0.801853
5A	253699564	TuG1812G0500001464.01	TuG1812G0500001464.01.T01	comp16093_c0_seq1	98.316	297	5	0	1	297	385	681	2.61e-147	521	0.775583	0.441562	1.16631	0.585776	1.50534	1.16938	-1.28935	-2.26469	-0.857403	-1.70714	-0.664301	-0.855151
5A	253713134	TuG1812G0500001466.01	TuG1812G0500001466.01.T01	comp18555_c0_seq1	93.651	252	2	1	1	252	1127	1364	4.52e-100	364	1.67049	1.07611	1.58775	1.07392	0.681885	1.52264	-0.598628	-0.929269	-0.629821	-0.931165	-1.46652	-0.656756
5A	255248165	TuG1812G0500001469.01	TuG1812G0500001469.01.T01	TC263852	96.953	361	11	0	1	361	492	852	9.56e-173	606	NA	NA	NA	0	1.18843	NA	NA	0	0	NA	-0.841447	NA
5A	256631729	TuG1812G0500001471.01	TuG1812G0500001471.01.T01	TC238714	93.214	501	30	3	1	500	2326	2823	0	734	0.590921	3.46456	0.61746	0.23865	3.16914	0.406036	-1.69227	-0.288637	-1.61954	-4.19024	-0.315543	-2.46284
5A	256631729	TuG1812G0500001471.01	TuG1812G0500001471.01.T01	TC388682	97.996	499	5	1	1	499	2343	2836	0	861	0.517056	4.61942	0.82328	0.61367	1.18843	1.21811	-1.93403	-0.216477	-1.21465	-1.62954	-0.841447	-0.820945
5A	256631729	TuG1812G0500001471.01	TuG1812G0500001471.01.T01	TC399157	98.6	500	7	0	1	500	2318	2817	0	885	0.278415	0.088835	0	0.0859138	0	0.0716534	-3.59177	-11.2568	NA	-11.6396	NA	-13.9561
5A	256631729	TuG1812G0500001471.01	TuG1812G0500001471.01.T01	comp12015_c0_seq1	99.01	404	2	1	36	437	2894	2491	0	723	2.30236	2.90705	1.73804	1.52557	1.38246	1.60569	-0.434337	-0.343992	-0.575362	-0.655491	-0.72335	-0.622786
5A	256839514	TuG1812G0500001472.01	TuG1812G0500001472.01.T02	TC239376	90.447	492	36	7	1	487	2101	2586	0	638	1.03411	0	NA	NA	0	NA	-0.967014	NA	NA	NA	NA	NA
5A	256839514	TuG1812G0500001472.01	TuG1812G0500001472.01.T02	TC242767	95.582	249	11	0	1	249	1162	1410	1.74e-110	399	NA	NA	NA	0	2.37686	NA	NA	0	0	NA	-0.420724	NA
5A	256839514	TuG1812G0500001472.01	TuG1812G0500001472.01.T02	TC260026	96.8	500	14	2	1	500	1593	2090	0	833	1.03411	0.230971	2.46984	1.07392	0.713057	NA	-0.967014	-4.32955	-0.404885	-0.931165	-1.40241	0
5A	256839514	TuG1812G0500001472.01	TuG1812G0500001472.01.T02	TC265986	96.794	499	16	0	2	500	144	642	0	833	2.06822	NA	NA	1.07392	1.58457	1.21811	-0.483507	0	0	-0.931165	-0.631086	-0.820945
5A	256839514	TuG1812G0500001472.01	TuG1812G0500001472.01.T02	TC371019	99.517	207	1	0	1	207	2311	2517	8.16e-104	377	1.07987	1.13623	0.778121	0.666104	0.723391	0.892292	-0.926039	-0.880105	-1.28515	-1.50127	-1.38238	-1.12071
5A	256839514	TuG1812G0500001472.01	TuG1812G0500001472.01.T02	TC373120	98.6	500	7	0	1	500	2102	2601	0	885	1.79609	1.35283	0.640329	0.797771	0.636658	0.730865	-0.556766	-0.739191	-1.5617	-1.25349	-1.5707	-1.36824
5A	256839514	TuG1812G0500001472.01	TuG1812G0500001472.01.T02	TC401878	97.473	277	5	2	1	276	2242	2517	2.81e-133	475	0.854266	0.727717	1.18003	1.27848	1.3964	1.12788	-1.1706	-1.37416	-0.847433	-0.782179	-0.716125	-0.886621
5A	256839514	TuG1812G0500001472.01	TuG1812G0500001472.01.T02	TC410655	97.479	357	8	1	92	448	2261	2616	2.66e-173	608	0.786965	0.901494	0.888619	0.650404	1.25098	1.23887	-1.2707	-1.10927	-1.12534	-1.53751	-0.799375	-0.807186
5A	256839514	TuG1812G0500001472.01	TuG1812G0500001472.01.T02	TC437945	98.218	505	4	5	1	500	1933	2437	0	878	NA	1.15485	NA	1.07392	1.18843	0.243622	0	-0.86591	0	-0.931165	-0.841447	-4.10473
5A	256839514	TuG1812G0500001472.01	TuG1812G0500001472.01.T02	comp12878_c0_seq1	100	124	0	0	1	124	2217	2340	5.09e-60	230	1.05566	0.864064	1.0683	0.805442	1.24245	0.952339	-0.947279	-1.15732	-0.936064	-1.24155	-0.804863	-1.05005
5A	256839514	TuG1812G0500001472.01	TuG1812G0500001472.01.T01	comp2129_c0_seq1	98.881	447	5	0	1	447	1999	2445	0	798	0.818361	0.894837	0.590614	0.669528	0.585269	0.859286	-1.22195	-1.11752	-1.69315	-1.49359	-1.70862	-1.16376
5A	256839514	TuG1812G0500001472.01	TuG1812G0500001472.01.T02	comp2903_c0_seq1	100	132	0	0	18	149	2448	2317	1.18e-63	244	0.993741	0.963242	0.934534	0.626455	1.08656	0.994895	-1.0063	-1.03816	-1.07005	-1.59628	-0.920333	-1.00513
5A	256839514	TuG1812G0500001472.01	TuG1812G0500001472.01.T02	comp5886_c0_seq1	99.479	192	1	0	52	243	2616	2425	8.21e-96	350	1.35337	1.05923	0.798332	0.740503	0.768155	0.994943	-0.738898	-0.944082	-1.25261	-1.35043	-1.30182	-1.00508
5A	258065870	TuG1812G0500001475.01	TuG1812G0500001475.01.T01	TC450656	93.825	502	26	4	1	500	1380	1878	0	750	3.10233	NA	0.82328	1.07392	0.297107	0	-0.322338	0	-1.21465	-0.931165	-3.36579	NA
5A	258065870	TuG1812G0500001475.01	TuG1812G0500001475.01.T01	comp5289_c0_seq1	98.807	419	3	1	1	419	1513	1929	0	745	1.44002	1.85602	0.865499	0.958543	0.68689	1.1341	-0.694433	-0.538788	-1.1554	-1.04325	-1.45584	-0.881756
5A	258069749	TuG1812G0500001476.01	TuG1812G0500001476.01.T01	TC382212	97.172	495	13	1	1	494	657	163	0	850	1.03411	NA	NA	0	0	NA	-0.967014	0	NA	NA	NA	NA
5A	258077156	TuG1812G0500001477.01	TuG1812G0500001477.01.T01	TC266234	93.443	488	16	7	1	480	328	807	0	710	0.960246	2.07874	0.274427	0.751746	0.548505	0.870077	-1.0414	-0.481061	-3.64396	-1.33024	-1.82314	-1.14932
5A	258077156	TuG1812G0500001477.01	TuG1812G0500001477.01.T01	TC410434	96.8	375	8	4	1	374	477	848	9.49e-178	623	2.84381	0.962379	1.92099	0.357974	1.3582	1.39212	-0.351641	-1.03909	-0.520566	-2.7935	-0.736266	-0.718327
5A	258077156	TuG1812G0500001477.01	TuG1812G0500001477.01.T01	comp1219_c0_seq1	99.702	336	1	0	1	336	560	895	1.39e-175	616	1.40764	1.33481	0.656572	0.73334	0.844538	1.19276	-0.710408	-0.749168	-1.52306	-1.36362	-1.18408	-0.838389
5A	259331740	TuG1812G0500001478.01	TuG1812G0500001478.01.T01	BE424466	97.785	316	6	1	1	315	822	1137	4.64e-154	544	0.539536	0.378314	0.470446	0.394502	0.267063	0.537401	-1.85344	-2.6433	-2.12564	-2.53484	-3.74444	-1.86081
5A	259331740	TuG1812G0500001478.01	TuG1812G0500001478.01.T01	TC449475	96.065	432	12	3	71	500	636	1064	0	699	0.601665	0.6202	0.35013	0.243727	0.324961	0.406036	-1.66206	-1.61238	-2.85608	-4.10295	-3.07729	-2.46284
5A	259331740	TuG1812G0500001478.01	TuG1812G0500001478.01.T01	comp2434_c0_seq1	97.907	430	7	1	42	471	1148	721	0	743	1.20259	1.18385	0.947593	0.733295	0.619472	0.822435	-0.831539	-0.844704	-1.05531	-1.36371	-1.61428	-1.2159
5A	259506971	TuG1812G0500001479.01	TuG1812G0500001479.01.T01	TC271691	89.546	507	28	9	1	482	1655	2161	1.23e-176	619	0.775583	1.15485	NA	2.14785	0.339551	0	-1.28935	-0.86591	0	-0.465583	-2.94507	NA
5A	259506971	TuG1812G0500001479.01	TuG1812G0500001479.01.T01	TC457527	99.2	500	4	0	1	500	1406	1905	0	904	1.20646	0.923884	3.01869	0.460253	0.990357	3.95885	-0.828869	-1.08239	-0.331269	-2.17272	-1.00974	-0.252599
5A	259506971	TuG1812G0500001479.01	TuG1812G0500001479.01.T01	comp7471_c0_seq1	97.159	352	10	0	1	352	1882	2233	1.48e-169	595	1.32209	1.0196	0.877089	0.903197	0.761813	1.03704	-0.756377	-0.980776	-1.14014	-1.10718	-1.31266	-0.964285
5A	260003703	TuG1812G0500001480.01	TuG1812G0500001480.01.T01	TC244413	88.017	484	34	10	1	484	3789	4248	4.54e-156	551	0.775583	3.46456	0.41164	0.357974	0.198071	1.62414	-1.28935	-0.288637	-2.42931	-2.7935	-5.04868	-0.615709
5A	260003703	TuG1812G0500001480.01	TuG1812G0500001480.01.T01	TC264576	98.8	500	6	0	1	500	673	1172	0	891	NA	NA	1.09771	0.715949	NA	2.43622	NA	NA	-0.91099	-1.39675	NA	-0.410473
5A	260003703	TuG1812G0500001480.01	TuG1812G0500001480.01.T01	TC266353	98	500	10	0	1	500	1910	2409	0	869	1.55117	1.67255	1.95148	0.47379	0.864312	0.597112	-0.644676	-0.59789	-0.512432	-2.11064	-1.15699	-1.67473
5A	260003703	TuG1812G0500001480.01	TuG1812G0500001480.01.T01	TC373552	98.603	501	6	1	1	500	3596	4096	0	885	1.72352	1.15485	1.09771	0	0.594214	1.21811	-0.580208	-0.86591	-0.91099	NA	-1.68289	-0.820945
5A	260003703	TuG1812G0500001480.01	TuG1812G0500001480.01.T01	TC451822	98.295	352	6	0	1	352	1618	1969	4.42e-176	617	NA	0.962379	NA	0	0.297107	0.406036	0	-1.03909	0	NA	-3.36579	-2.46284
5A	260800112	TuG1812G0500001482.01	TuG1812G0500001482.01.T01	TC248729	96.137	466	18	0	1	466	190	655	0	761	NA	2.88714	0.686067	NA	0	1.21811	0	-0.346364	-1.45758	0	NA	-0.820945
5A	260799654	TuG1812G0500001481.01	TuG1812G0500001481.01.T01	TC422552	98.96	481	5	0	1	481	26	506	0	861	0.12166	0.866141	1.09771	0.390517	0.324117	0.182716	-8.21962	-1.15455	-0.91099	-2.5607	-3.08531	-5.47297
5A	260799654	TuG1812G0500001481.01	TuG1812G0500001481.01.T01	comp2496_c0_seq1	99.065	428	4	0	55	482	272	699	0	769	0.59455	0.387643	0.427088	0.355052	0.452069	0.460218	-1.68194	-2.57969	-2.34144	-2.81649	-2.21205	-2.17288
5A	260972529	TuG1812G0500001488.01	TuG1812G0500001488.01.T01	TC391297	96.414	502	10	4	1	500	850	1345	0	821	1.03411	NA	0.548853	NA	NA	NA	-0.967014	NA	-1.82198	NA	NA	0
5A	260972529	TuG1812G0500001488.01	TuG1812G0500001488.01.T01	comp13021_c0_seq1	99.712	347	1	0	1	347	1028	1374	0	636	1.46874	1.04188	0.978085	0.914823	0.6129	1.14138	-0.680857	-0.959804	-1.02241	-1.09311	-1.63159	-0.876135
5A	261275644	TuG1812G0500001491.01	TuG1812G0500001491.01.T01	CV775689	98.837	86	1	0	1	86	1264	1349	1.5e-36	154	0	0	0.548853	2.14785	0	0.406036	NA	NA	-1.82198	-0.465583	NA	-2.46284
5A	261275644	TuG1812G0500001491.01	TuG1812G0500001491.01.T01	TC373730	98.8	500	5	1	1	500	857	1355	0	889	NA	NA	0	2.14785	NA	0	0	NA	NA	-0.465583	0	NA
5A	261275644	TuG1812G0500001491.01	TuG1812G0500001491.01.T01	TC398220	99.367	316	2	0	153	468	1166	1481	9.7e-163	573	1.70628	1.76436	1.67885	0.826095	0.993313	1.23526	-0.586069	-0.566777	-0.595648	-1.21052	-1.00673	-0.809543
5A	261275644	TuG1812G0500001491.01	TuG1812G0500001491.01.T01	comp10003_c0_seq1	99.333	150	1	0	1	150	1332	1481	1.65e-72	272	1.8556	1.13243	1.66851	0.808249	1.41697	1.36866	-0.538909	-0.883057	-0.599336	-1.23724	-0.70573	-0.730641
5A	261275644	TuG1812G0500001491.01	TuG1812G0500001491.01.T01	comp4243_c0_seq1	98.947	190	2	0	19	208	1355	1166	4.96e-93	340	1.06655	0.762578	1.09211	0.725732	1.04651	0.730738	-0.937602	-1.31134	-0.915662	-1.37792	-0.955554	-1.36848
5A	261274176	TuG1812G0500001492.01	TuG1812G0500001492.01.T01	comp31398_c0_seq1	99.296	142	1	0	1	142	1235	1376	2.76e-68	257	0	4.61942	1.09771	0.357974	0.475371	NA	NA	-0.216477	-0.91099	-2.7935	-2.10362	0
5A	261274176	TuG1812G0500001492.01	TuG1812G0500001492.01.T01	comp34250_c0_seq1	99.248	133	0	1	1	133	1058	1189	9.23e-63	239	3.10233	0	0.82328	0	1.78264	0	-0.322338	NA	-1.21465	NA	-0.560965	NA
5A	262527426	TuG1812G0500001493.01	TuG1812G0500001493.01.T01	comp12340_c0_seq1	100	326	0	0	1	326	2055	2380	8.44e-172	603	0.742439	1.47966	1.31725	0.82985	0.939688	0.756704	-1.34691	-0.675832	-0.759159	-1.20504	-1.06418	-1.32152
5A	262906154	TuG1812G0500001494.01	TuG1812G0500001494.01.T01	CA640416	96.252	507	1	18	1	489	445	951	0	815	1.75799	0.577427	4.93968	1.0174	1.28746	1.42113	-0.568832	-1.73182	-0.202442	-0.982897	-0.776721	-0.703667
5A	262911585	TuG1812G0500001495.01	TuG1812G0500001495.01.T01	comp16418_c0_seq1	99.387	163	1	0	1	163	823	985	1.83e-79	296	1.95332	1.11636	2.0925	1.63645	1.80313	1.82716	-0.511949	-0.895769	-0.477897	-0.611077	-0.55459	-0.547297
5A	262940832	TuG1812G0500001496.01	TuG1812G0500001496.01.T01	TC258127	93.346	511	22	9	1	500	2397	2906	0	745	0.954564	0.769903	0.480247	0.904356	1.03987	0.749605	-1.0476	-1.29886	-2.08226	-1.10576	-0.961654	-1.33404
5A	262940832	TuG1812G0500001496.01	TuG1812G0500001496.01.T01	TC378196	99.786	468	1	0	1	468	2362	2829	0	859	1.22801	1.25109	0.937624	1.00537	0.639923	1.06194	-0.814327	-0.799301	-1.06653	-0.994654	-1.56269	-0.941672
5A	262940832	TuG1812G0500001496.01	TuG1812G0500001496.01.T01	comp20389_c0_seq1	100	274	0	0	18	291	2906	2633	5.8e-143	507	1.40137	1.58667	1.13622	0.926135	0.926974	1.0884	-0.71359	-0.630251	-0.880109	-1.07976	-1.07878	-0.918778
5A	263709875	TuG1812G0500001498.01	TuG1812G0500001498.01.T01	TC243110	95.312	320	15	0	1	320	292	611	2.77e-143	508	0.486641	1.06602	2.0582	1.15653	1.10354	1.82716	-2.0549	-0.938069	-0.485862	-0.864654	-0.906174	-0.547297
5A	263709875	TuG1812G0500001498.01	TuG1812G0500001498.01.T01	TC371248	99.004	502	3	1	1	500	279	780	0	898	NA	NA	0.548853	0	NA	NA	NA	NA	-1.82198	NA	0	NA
5A	263709875	TuG1812G0500001498.01	TuG1812G0500001498.01.T01	TC414004	97.742	310	5	2	1	310	905	1212	4.58e-151	534	2.06822	0.577427	1.09771	0.920505	0.594214	0.812072	-0.483507	-1.73182	-0.91099	-1.08636	-1.68289	-1.23142
5A	263709875	TuG1812G0500001498.01	TuG1812G0500001498.01.T01	comp14503_c0_seq1	97.849	279	3	3	1	277	935	1212	2.21e-134	479	0.818671	0.843932	0.850722	0.811409	0.560579	0.555628	-1.22149	-1.18493	-1.17547	-1.23242	-1.78387	-1.79976
5A	263709875	TuG1812G0500001498.01	TuG1812G0500001498.01.T01	comp699_c0_seq1	97.17	424	9	1	1	421	433	856	0	713	0.947473	1.00535	1.47227	1.1064	1.21453	1.14416	-1.05544	-0.994682	-0.679221	-0.903832	-0.823367	-0.874002
5A	264171280	TuG1812G0500001502.01	TuG1812G0500001502.01.T01	TC251055	89.597	298	23	6	4	299	1211	1502	3.8e-102	372	2.06822	1.15485	NA	NA	NA	NA	-0.483507	-0.86591	0	NA	0	0
5A	264171280	TuG1812G0500001502.01	TuG1812G0500001502.01.T01	TC452016	98.701	462	4	1	39	500	895	1354	0	819	NA	NA	NA	0	2.37686	NA	0	NA	NA	NA	-0.420724	0
5A	264171280	TuG1812G0500001502.01	TuG1812G0500001502.01.T02	comp26745_c0_seq1	98.625	291	2	1	1	291	1277	1565	3.67e-145	514	5.51526	1.15485	1.64656	3.00698	1.45252	1.99327	-0.181315	-0.86591	-0.607327	-0.332559	-0.688457	-0.501689
5A	264501943	TuG1812G0500001503.01	TuG1812G0500001503.01.T02	BF474936	98.6	500	7	0	1	500	130	629	0	885	NA	2.30971	NA	2.14785	NA	NA	NA	-0.432955	0	-0.465583	0	NA
5A	264501943	TuG1812G0500001503.01	TuG1812G0500001503.01.T01	TC244036	92.731	454	27	4	1	450	1475	1926	0	652	NA	NA	0.82328	2.14785	NA	NA	0	0	-1.21465	-0.465583	0	0
5A	264501943	TuG1812G0500001503.01	TuG1812G0500001503.01.T01	TC376438	98.004	501	8	2	1	500	1406	1905	0	869	0	0.384951	NA	3.22177	0	3.65432	NA	-2.59773	0	-0.310388	NA	-0.273648
5A	264501943	TuG1812G0500001503.01	TuG1812G0500001503.01.T02	TC461809	76.016	492	90	19	6	490	312	782	2.42e-59	230	3.44704	1.78478	0.891886	1.53418	1.02997	1.30512	-0.290104	-0.560295	-1.12122	-0.651816	-0.970901	-0.766216
5A	264501943	TuG1812G0500001503.01	TuG1812G0500001503.01.T01	comp7859_c0_seq1	99.711	346	1	0	32	377	1926	1581	0	634	0.838174	1.03078	1.82951	0.765569	1.12851	0.760016	-1.19307	-0.97014	-0.546594	-1.30622	-0.886126	-1.31576
5A	265065473	TuG1812G0500001504.01	TuG1812G0500001504.01.T01	BU969444	96.711	456	9	2	45	500	130	579	0	754	NA	1.15485	0.274427	NA	0	0	0	-0.86591	-3.64396	NA	NA	NA
5A	265065473	TuG1812G0500001504.01	TuG1812G0500001504.01.T01	TC388991	98.802	501	5	1	1	500	615	1115	0	891	2.06822	2.30971	1.64656	0.61367	0.713057	0.304527	-0.483507	-0.432955	-0.607327	-1.62954	-1.40241	-3.28378
5A	265065473	TuG1812G0500001504.01	TuG1812G0500001504.01.T01	TC398810	96.632	475	9	7	1	469	439	912	0	791	NA	2.30971	0.41164	0.429569	1.18843	1.21811	NA	-0.432955	-2.42931	-2.32791	-0.841447	-0.820945
5A	265065473	TuG1812G0500001504.01	TuG1812G0500001504.01.T01	comp10795_c0_seq1	99.115	339	2	1	1	338	795	1133	1.85e-173	608	1.66706	2.17738	0.691148	0.835273	0.812497	0.807295	-0.599859	-0.459267	-1.44687	-1.19721	-1.23077	-1.2387
5A	265240195	TuG1812G0500001505.01	TuG1812G0500001505.01.T01	TC254449	90.683	322	17	7	3	313	1214	1533	1.73e-115	416	NA	2.30971	NA	0	0.594214	0	0	-0.432955	NA	NA	-1.68289	NA
5A	265240195	TuG1812G0500001505.01	TuG1812G0500001505.01.T01	TC389832	98.207	502	7	2	1	500	1016	1517	0	878	8.27289	9.56879	1.18215	3.57974	3.56529	10.5569	-0.120877	-0.104506	-0.84592	-0.27935	-0.280482	-0.0947244
5A	265240195	TuG1812G0500001505.01	TuG1812G0500001505.01.T01	TC394720	99.4	500	3	0	1	500	250	749	0	907	NA	1.15485	0	NA	1.18843	NA	NA	-0.86591	NA	NA	-0.841447	NA
5A	265255806	TuG1812G0500001506.01	TuG1812G0500001506.01.T01	BJ267795	98.4	500	1	1	1	500	764	1256	0	872	NA	1.15485	NA	NA	0	NA	NA	-0.86591	0	NA	NA	NA
5A	265255806	TuG1812G0500001506.01	TuG1812G0500001506.01.T01	TC384486	85.101	396	31	15	126	500	1183	1571	2.27e-104	379	4.13645	2.88714	0.82328	4.29569	0.792286	0.812072	-0.241753	-0.346364	-1.21465	-0.232791	-1.26217	-1.23142
5A	265255806	TuG1812G0500001506.01	TuG1812G0500001506.01.T01	TC394958	83.871	155	22	3	160	313	1816	1968	9.01e-34	145	0.413645	1.38583	0.731804	2.14785	1.58457	1.46173	-2.41753	-0.721592	-1.36649	-0.465583	-0.631086	-0.684121
5A	265255806	TuG1812G0500001506.01	TuG1812G0500001506.01.T01	TC414158	85.161	155	20	3	86	239	1816	1968	4.16e-37	156	NA	0	NA	NA	NA	3.65432	NA	NA	NA	NA	NA	-0.273648
5A	265255806	TuG1812G0500001506.01	TuG1812G0500001506.01.T01	TC440823	98.467	261	3	1	1	260	1714	1974	2.83e-128	459	0.726673	0.846893	0.89646	0.838184	1.06333	0.870077	-1.37614	-1.18079	-1.1155	-1.19306	-0.940441	-1.14932
5A	265255806	TuG1812G0500001506.01	TuG1812G0500001506.01.T01	comp12762_c0_seq1	87.879	99	7	2	93	189	1174	1269	3.18e-24	111	1.62503	2.80465	0.754673	0.743485	1.46268	1.82716	-0.615372	-0.356551	-1.32508	-1.34502	-0.683676	-0.547297
5A	265255806	TuG1812G0500001506.01	TuG1812G0500001506.01.T01	comp20215_c0_seq1	96.154	104	4	0	9	112	1183	1286	2.79e-42	171	1.55117	0	NA	1.07392	1.58457	1.21811	-0.644676	NA	0	-0.931165	-0.631086	-0.820945
5A	265255806	TuG1812G0500001506.01	TuG1812G0500001506.01.T01	comp4496_c0_seq1	94.048	168	9	1	224	391	1974	1808	1.11e-66	254	1.00229	0.774838	1.04816	1.06964	1.44752	0.913581	-0.997713	-1.29059	-0.954055	-0.93489	-0.690838	-1.09459
5A	265257221	TuG1812G0500001507.01	TuG1812G0500001507.01.T01	comp12550_c0_seq1	91.765	170	13	1	6	175	754	922	2.94e-61	235	0.629459	1.20297	1.1975	0.884407	0.817045	2.28395	-1.58867	-0.831274	-0.835075	-1.1307	-1.22392	-0.437837
5A	265257221	TuG1812G0500001507.01	TuG1812G0500001507.01.T01	comp7339_c0_seq1	90.116	172	7	1	213	374	751	922	5.47e-55	215	1.14215	0.979877	1.09771	1.12062	0.961229	1.00771	-0.87554	-1.02054	-0.91099	-0.892367	-1.04033	-0.992351
5A	266444661	TuG1812G0500001508.01	TuG1812G0500001508.01.T02	TC372066	98.403	501	6	2	1	499	2089	2589	0	880	NA	0.577427	NA	0.536962	0	4.87243	0	-1.73182	0	-1.86233	NA	-0.205236
5A	266444661	TuG1812G0500001508.01	TuG1812G0500001508.01.T02	TC379072	99	500	5	0	1	500	1898	2397	0	896	2.80687	1.6168	0.848228	0.762139	0.383364	0.953302	-0.356268	-0.618507	-1.17893	-1.3121	-2.60849	-1.04899
5A	266444661	TuG1812G0500001508.01	TuG1812G0500001508.01.T02	TC397973	99.2	500	4	0	1	500	1572	2071	0	904	NA	NA	0	NA	1.18843	1.21811	0	NA	NA	NA	-0.841447	-0.820945
5A	266444661	TuG1812G0500001508.01	TuG1812G0500001508.01.T01	TC407398	99.6	500	2	0	1	500	1325	1824	0	913	NA	NA	NA	NA	0	0.609054	NA	0	0	NA	NA	-1.64189
5A	266444661	TuG1812G0500001508.01	TuG1812G0500001508.01.T02	comp21094_c0_seq1	99.666	299	1	0	16	314	2568	2270	3.59e-155	547	1.58453	1.63809	0.739876	0.702293	0.625106	0.966228	-0.631104	-0.610467	-1.35158	-1.42391	-1.59973	-1.03495
5A	269560740	TuG1812G0500001514.01	TuG1812G0500001514.01.T03	TC244987	96.364	220	8	0	1	220	531	750	2.29e-99	363	0.940101	1.15485	2.46984	3.57974	1.52798	1.33992	-1.06372	-0.86591	-0.404885	-0.27935	-0.654459	-0.746314
5A	269560740	TuG1812G0500001514.01	TuG1812G0500001514.01.T03	TC378893	100	305	0	0	1	305	446	750	5.84e-160	564	1.32136	0.968588	1.41787	1.22734	0.810292	1.42113	-0.756793	-1.03243	-0.705283	-0.81477	-1.23412	-0.703667
5A	269560740	TuG1812G0500001514.01	TuG1812G0500001514.01.T01	comp2810_c0_seq1	98.983	295	3	0	93	387	838	1132	1.94e-149	529	1.3675	1.27653	1.02301	0.78243	1.17042	1.29825	-0.731263	-0.783371	-0.977507	-1.27807	-0.854393	-0.77027
5A	270377429	TuG1812G0500001519.01	TuG1812G0500001519.01.T02	TC392318	99.8	500	1	0	1	500	1704	2203	0	918	NA	NA	NA	4.29569	2.37686	1.21811	0	0	0	-0.232791	-0.420724	-0.820945
5A	270377429	TuG1812G0500001519.01	TuG1812G0500001519.01.T02	comp11106_c0_seq1	96.783	373	3	2	15	378	2482	2110	4.25e-175	614	1.06366	1.80021	1.75633	1.30555	1.13441	1.50472	-0.940152	-0.555489	-0.569369	-0.765959	-0.881516	-0.664575
5A	273675714	TuG1812G0500001522.01	TuG1812G0500001522.01.T01	TC436278	98.6	500	6	1	1	500	1932	2430	0	883	1.30388	1.52441	1.38193	1.12762	1.34689	1.20165	-0.766942	-0.655992	-0.723624	-0.886824	-0.742454	-0.832191
5A	273675714	TuG1812G0500001522.01	TuG1812G0500001522.01.T01	comp10771_c0_seq1	100	251	0	0	9	259	2202	2452	3.24e-130	464	1.17018	1.67389	1.36007	1.1021	1.17658	1.1369	-0.85457	-0.597411	-0.735256	-0.907357	-0.849918	-0.879584
5A	274218547	TuG1812G0500001523.01	TuG1812G0500001523.01.T01	TC409030	88.298	470	29	13	1	468	1330	1775	9.84e-153	540	NA	1.15485	0.548853	0	0	3.65432	0	-0.86591	-1.82198	NA	NA	-0.273648
5A	274218547	TuG1812G0500001523.01	TuG1812G0500001523.01.T01	TC444644	81.525	341	28	19	1	323	1460	1783	4.23e-65	248	NA	6.92913	NA	0	NA	1.21811	0	-0.144318	0	NA	0	-0.820945
5A	274218547	TuG1812G0500001523.01	TuG1812G0500001523.01.T01	comp2320_c0_seq1	99.054	317	3	0	70	386	1785	1469	9.53e-162	569	4.68516	3.56019	1.78085	0.769645	0.468087	1.84242	-0.21344	-0.280884	-0.561529	-1.2993	-2.13635	-0.542765
5A	274476583	TuG1812G0500001525.01	TuG1812G0500001525.01.T01	TC378192	100	500	0	0	1	500	1357	1856	0	924	1.13752	2.30971	0.548853	0.715949	0.629168	1.12441	-0.879104	-0.432955	-1.82198	-1.39675	-1.5894	-0.889357
5A	274725403	TuG1812G0500001527.01	TuG1812G0500001527.01.T01	TC446638	99.8	500	1	0	1	500	718	1217	0	918	182.004	71.601	4.41827	NA	17.8264	126.683	-0.0054944	-0.0139663	-0.226333	0	-0.0560965	-0.0078937
5A	274725403	TuG1812G0500001527.01	TuG1812G0500001527.01.T01	comp12479_c0_seq1	99.512	205	1	0	1	205	143	347	4.76e-103	374	0.861759	0	0	0	0	0	-1.16042	NA	NA	NA	NA	NA
5A	275218735	TuG1812G0500001535.01	TuG1812G0500001535.01.T01	comp24682_c0_seq1	98.333	240	4	0	149	388	852	1091	2.96e-117	422	0.14773	1.29921	0.603739	0.585776	1.01865	0.730865	-6.7691	-0.769698	-1.65635	-1.70714	-0.981689	-1.36824
5A	275263822	TuG1812G0500001537.01	TuG1812G0500001537.01.T01	TC457862	97.143	175	5	0	1	175	2663	2837	2.35e-79	296	5.17056	4.61942	0.274427	0.214785	0	3.65432	-0.193403	-0.216477	-3.64396	-4.65583	NA	-0.273648
5A	275263822	TuG1812G0500001537.01	TuG1812G0500001537.01.T01	comp25234_c0_seq1	100	40	0	0	1	40	2798	2837	2.83e-13	75	1.03411	2.021	0.274427	0.429569	0.297107	5.48149	-0.967014	-0.494806	-3.64396	-2.32791	-3.36579	-0.182432
5A	275393362	TuG1812G0500001538.01	TuG1812G0500001538.01.T01	TC243224	97.315	447	12	0	1	447	335	781	0	760	1.14901	1.08268	0.686067	0.452178	0.52819	1.21811	-0.870313	-0.923637	-1.45758	-2.21152	-1.89326	-0.820945
5A	275393362	TuG1812G0500001538.01	TuG1812G0500001538.01.T01	TC277444	85.958	527	21	15	1	500	988	488	5.96e-145	514	NA	1.15485	0	NA	NA	NA	NA	-0.86591	NA	NA	NA	NA
5A	275393362	TuG1812G0500001538.01	TuG1812G0500001538.01.T01	TC398624	95.418	502	16	2	1	497	537	1036	0	793	1.03411	NA	NA	0	0	0	-0.967014	NA	0	NA	NA	NA
5A	275393362	TuG1812G0500001538.01	TuG1812G0500001538.01.T01	comp546_c0_seq1	99.544	658	3	0	23	680	448	1105	0	1199	0.739101	0.831879	1.13032	1.08602	0.893812	1.03919	-1.353	-1.2021	-0.884703	-0.92079	-1.1188	-0.962292
5A	275421971	TuG1812G0500001539.01	TuG1812G0500001539.01.T01	comp22894_c0_seq1	100	31	0	0	1	31	474	504	6.89e-08	58.4	1.8614	0.692913	1.46361	0.920505	2.13917	3.04527	-0.53723	-1.44318	-0.683243	-1.08636	-0.467471	-0.328378
5A	275421971	TuG1812G0500001539.01	TuG1812G0500001539.01.T01	comp8504_c0_seq1	91.558	154	13	0	100	253	943	1096	2.29e-54	213	1.66467	0.778007	2.0017	0.501164	1.08656	1.03071	-0.600721	-1.28534	-0.499575	-1.99535	-0.920333	-0.970208
5A	276624490	TuG1812G0500001540.01	TuG1812G0500001540.01.T04	TC267411	91.626	406	30	3	1	403	877	1281	2.72e-158	558	NA	2.30971	NA	2.14785	0	0.609054	NA	-0.432955	0	-0.465583	NA	-1.64189
5A	276624490	TuG1812G0500001540.01	TuG1812G0500001540.01.T03	comp14462_c0_seq1	99.242	264	2	0	2	265	1531	1794	4.13e-134	477	1.29635	1.51295	0.764329	0.967498	0.845866	1.36222	-0.771397	-0.660961	-1.30834	-1.03359	-1.18222	-0.734095
5A	277780075	TuG1812G0500001547.01	TuG1812G0500001547.01.T01	comp1967_c0_seq1	96.085	281	11	0	108	388	1253	973	2.43e-128	459	0.796102	0.839443	0.792975	0.597464	0.621301	0.903118	-1.25612	-1.19127	-1.26107	-1.67374	-1.60953	-1.10727
5A	277818581	TuG1812G0500001548.01	TuG1812G0500001548.01.T02	comp18548_c0_seq1	98.616	289	4	0	1	289	683	971	1.92e-144	512	0.940101	1.64979	2.0582	0.954598	0.713057	1.35345	-1.06372	-0.606137	-0.485862	-1.04756	-1.40241	-0.738851
5A	277818581	TuG1812G0500001548.01	TuG1812G0500001548.01.T01	comp18548_c0_seq2	98.635	293	4	0	1	293	661	953	9.42e-147	520	3.10233	0.769903	NA	0.660876	0.891321	1.01509	-0.322338	-1.29886	0	-1.51314	-1.12193	-0.985134
5A	277995462	TuG1812G0500001549.01	TuG1812G0500001549.01.T01	CJ631243	99.6	500	1	1	1	500	481	979	0	911	0	NA	NA	0	0.594214	0	NA	0	0	NA	-1.68289	NA
5A	277995462	TuG1812G0500001549.01	TuG1812G0500001549.01.T01	TC250976	95.635	504	18	3	1	500	1991	2494	0	806	0.723878	1.0105	1.09771	0.379032	0.668491	1.21811	-1.38145	-0.989611	-0.91099	-2.6383	-1.49591	-0.820945
5A	277995462	TuG1812G0500001549.01	TuG1812G0500001549.01.T01	TC406203	99.6	500	1	1	1	500	2082	2580	0	911	1.05225	1.24369	0.891886	1.10194	0.465468	1.00565	-0.950341	-0.804059	-1.12122	-0.907492	-2.14838	-0.994384
5A	277995462	TuG1812G0500001549.01	TuG1812G0500001549.01.T01	comp23128_c0_seq1	99.554	224	1	0	18	241	2377	2600	1.34e-113	409	1.11684	1.58792	0.477264	0.606451	0.658207	1.02703	-0.895383	-0.629753	-2.09528	-1.64894	-1.51928	-0.973679
5A	277998578	TuG1812G0500001550.01	TuG1812G0500001550.01.T01	TC428853	95.322	513	7	3	1	500	1059	1567	0	798	NA	0.577427	NA	0.429569	NA	0.609054	0	-1.73182	0	-2.32791	0	-1.64189
5A	277998578	TuG1812G0500001550.01	TuG1812G0500001550.01.T01	comp19653_c0_seq1	96.417	307	0	2	1	296	1297	1603	1.23e-139	496	1.46499	1.34733	2.4241	0.631719	2.01516	1.36576	-0.682598	-0.742209	-0.412524	-1.58298	-0.496238	-0.732194
5A	278824291	TuG1812G0500001556.01	TuG1812G0500001556.01.T01	TC260612	86.01	386	38	9	43	418	418	39	1.72e-110	399	NA	NA	NA	NA	NA	1.21811	NA	NA	0	NA	NA	-0.820945
5A	279543438	TuG1812G0500001560.01	TuG1812G0500001560.01.T01	comp29735_c0_seq1	99.49	196	1	0	1	196	958	1153	3.85e-98	357	0.620467	4.04199	0.686067	0.357974	0.198071	2.43622	-1.61169	-0.247403	-1.45758	-2.7935	-5.04868	-0.410473
5A	279549411	TuG1812G0500001561.01	TuG1812G0500001561.01.T01	DR734531	100	266	0	0	1	266	854	1119	2.79e-138	492	2.06822	NA	0.274427	0	NA	0	-0.483507	NA	-3.64396	NA	NA	NA
5A	280008812	TuG1812G0500001563.01	TuG1812G0500001563.01.T01	comp16136_c0_seq1	94.624	93	5	0	147	239	62	154	4.08e-34	145	2.58528	1.0105	1.64656	0.536962	0.594214	1.21811	-0.386806	-0.989611	-0.607327	-1.86233	-1.68289	-0.820945
5A	280008812	TuG1812G0500001563.01	TuG1812G0500001563.01.T01	comp16136_c0_seq2	93.651	126	8	0	1	126	93	218	8.91e-48	189	1.03411	NA	0	1.07392	1.18843	1.21811	-0.967014	0	NA	-0.931165	-0.841447	-0.820945
5A	280060801	TuG1812G0500001564.01	TuG1812G0500001564.01.T01	comp10629_c0_seq1	98.667	225	0	1	20	244	222	1	1.91e-109	396	0.662892	0.534336	1.26658	0.637642	0.651719	0.546048	-1.50854	-1.87148	-0.789525	-1.56828	-1.5344	-1.83134
5A	280080892	TuG1812G0500001565.01	TuG1812G0500001565.01.T01	TC376853	99.725	363	1	0	1	363	1655	2017	0	665	NA	NA	0.274427	0	5.94214	2.43622	NA	0	-3.64396	NA	-0.168289	-0.410473
5A	280080892	TuG1812G0500001565.01	TuG1812G0500001565.01.T01	TC385015	100	497	0	0	1	497	1506	2002	0	918	3.10233	0.962379	0.274427	4.29569	1.18843	1.42113	-0.322338	-1.03909	-3.64396	-0.232791	-0.841447	-0.703667
5A	280080892	TuG1812G0500001565.01	TuG1812G0500001565.01.T01	comp9959_c0_seq1	99.022	511	5	0	1	511	1666	2176	0	917	1.31893	1.23877	0.972855	1.05102	0.908798	1.25841	-0.75819	-0.807252	-1.0279	-0.95146	-1.10035	-0.794656
5A	280786767	TuG1812G0500001566.01	TuG1812G0500001566.01.T03	TC441506	98.906	457	5	0	1	457	517	973	0	821	0.517056	0.692913	NA	1.07392	0.509326	0.348031	-1.93403	-1.44318	0	-0.931165	-1.96338	-2.87331
5A	280786767	TuG1812G0500001566.01	TuG1812G0500001566.01.T01	TC449292	99.6	500	2	0	1	500	1070	1569	0	913	1.25949	1.18579	1.0029	1.12438	0.856259	1.1058	-0.793969	-0.843321	-0.997104	-0.889382	-1.16787	-0.904322
5A	280786767	TuG1812G0500001566.01	TuG1812G0500001566.01.T01	comp10000_c0_seq1	100	213	0	0	44	256	1635	1423	4.4e-109	394	1.0476	1.2797	1.26957	1.05188	0.817239	1.44719	-0.954563	-0.781431	-0.787669	-0.950681	-1.22363	-0.690997
5A	280786767	TuG1812G0500001566.01	TuG1812G0500001566.01.T03	comp35083_c0_seq1	98.54	137	2	0	24	160	1277	1413	8.9e-64	243	1.39909	1.48481	1.64656	2.00466	1.02997	0.630056	-0.714749	-0.673486	-0.607327	-0.498839	-0.970901	-1.58716
5A	281677203	TuG1812G0500001569.01	TuG1812G0500001569.01.T01	TC245609	95.69	348	15	0	1	348	275	622	7.55e-159	560	0	NA	0.274427	0	0.594214	NA	NA	0	-3.64396	NA	-1.68289	0
5A	281677203	TuG1812G0500001569.01	TuG1812G0500001569.01.T02	TC392681	91.129	496	17	27	1	470	1361	1855	0	664	NA	1.15485	NA	0	NA	0	NA	-0.86591	NA	NA	NA	NA
5A	281677203	TuG1812G0500001569.01	TuG1812G0500001569.01.T02	TC398709	100	500	0	0	1	500	2216	2715	0	924	1.68834	1.1966	0.786338	0.623955	0.851286	1.27963	-0.592296	-0.835704	-1.27172	-1.60268	-1.17469	-0.781477
5A	281677203	TuG1812G0500001569.01	TuG1812G0500001569.01.T01	TC440493	96.783	373	2	1	1	373	742	1104	4.19e-175	614	1.55117	0.577427	1.04282	0.859138	0.756273	3.04527	-0.644676	-1.73182	-0.958937	-1.16396	-1.32227	-0.328378
5A	281677203	TuG1812G0500001569.01	TuG1812G0500001569.01.T01	comp31935_c0_seq1	99.187	246	2	0	10	255	795	550	4.13e-124	444	2.35907	1.27551	0.86661	0.533358	0.738959	0.812072	-0.423897	-0.784	-1.15392	-1.87491	-1.35326	-1.23142
5A	283394280	TuG1812G0500001583.01	TuG1812G0500001583.01.T01	TC440779	99.6	500	1	1	1	500	552	1050	0	911	NA	0	NA	0	0	1.21811	NA	NA	NA	NA	NA	-0.820945
5A	283394280	TuG1812G0500001583.01	TuG1812G0500001583.01.T01	comp6740_c0_seq1	87.029	239	12	11	1	231	695	922	3.54e-66	252	0.497905	0.368031	0.82328	0.592509	0.400185	0.62428	-2.00841	-2.71717	-1.21465	-1.68774	-2.49884	-1.60184
5A	283910509	TuG1812G0500001589.01	TuG1812G0500001589.01.T02	TC254585	95.729	398	17	0	2	399	251	648	0	641	NA	NA	NA	NA	0.594214	NA	NA	NA	0	0	-1.68289	NA
5A	283910509	TuG1812G0500001589.01	TuG1812G0500001589.01.T01	TC421687	99.599	499	2	0	1	499	1122	1620	0	911	1.06483	1.14391	1.18483	1.18626	0.858309	1.11219	-0.939119	-0.874196	-0.844006	-0.842987	-1.16508	-0.89913
5A	283910509	TuG1812G0500001589.01	TuG1812G0500001589.01.T01	comp6104_c0_seq1	98.485	132	2	0	1	132	1452	1583	9.49e-61	233	1.05225	0.870724	0.57992	0.651209	0.440955	0.562752	-0.950341	-1.14847	-1.72437	-1.53561	-2.2678	-1.77698
5A	283907014	TuG1812G0500001588.01	TuG1812G0500001588.01.T01	CA614694	92.285	337	21	5	1	334	4980	5314	2.51e-137	488	0	0	0.274427	3.22177	NA	0.609054	NA	NA	-3.64396	-0.310388	NA	-1.64189
5A	283907014	TuG1812G0500001588.01	TuG1812G0500001588.01.T03	TC267059	98.202	445	8	0	1	445	2612	3056	0	778	NA	NA	NA	NA	NA	0.609054	NA	NA	0	NA	NA	-1.64189
5A	283907014	TuG1812G0500001588.01	TuG1812G0500001588.01.T01	TC416201	96.715	487	15	1	1	486	5194	5680	0	809	1.80969	0.808398	1.18918	1.07392	0.848877	2.2332	-0.552579	-1.23701	-0.840914	-0.931165	-1.17803	-0.447788
5A	283907014	TuG1812G0500001588.01	TuG1812G0500001588.01.T01	comp6276_c0_seq1	99.459	370	2	0	1	370	5404	5773	0	673	1.18544	1.22485	0.910863	0.969995	0.662933	0.915681	-0.843565	-0.816429	-1.09786	-1.03093	-1.50845	-1.09208
5A	284164287	TuG1812G0500001590.01	TuG1812G0500001590.01.T01	CA629541	91.898	469	9	22	1	440	49	517	1.58e-180	632	1.03411	NA	NA	NA	NA	NA	-0.967014	NA	NA	NA	NA	0
5A	284164287	TuG1812G0500001590.01	TuG1812G0500001590.01.T01	TC403012	97.006	501	14	1	1	500	1386	1886	0	841	1.03411	1.15485	NA	0	3.56529	1.21811	-0.967014	-0.86591	0	NA	-0.280482	-0.820945
5A	284164287	TuG1812G0500001590.01	TuG1812G0500001590.01.T01	comp1639_c0_seq1	98.104	211	4	0	1	211	1508	1718	5.44e-101	368	0.907808	1.09274	1.10634	0.690493	0.972193	1.13165	-1.10155	-0.91513	-0.903884	-1.44824	-1.0286	-0.883666
5A	284164287	TuG1812G0500001590.01	TuG1812G0500001590.01.T01	comp28252_c0_seq1	91.667	108	9	0	226	333	1715	1822	1.32e-35	150	0	0	0	0.715949	0.792286	0.406036	NA	NA	NA	-1.39675	-1.26217	-2.46284
5A	284164287	TuG1812G0500001590.01	TuG1812G0500001590.01.T01	comp36439_c0_seq1	99.567	231	1	0	1	231	234	464	1.7e-117	422	1.16338	1.51019	1.71517	0.409114	0.803937	1.37037	-0.859568	-0.662166	-0.583034	-2.44431	-1.24388	-0.729729
5A	284229802	TuG1812G0500001591.01	TuG1812G0500001591.01.T01	TC396079	97.787	497	10	1	5	500	1507	2003	0	856	0	NA	NA	0	0.594214	2.43622	NA	0	0	NA	-1.68289	-0.410473
5A	284230343	TuG1812G0500001592.01	TuG1812G0500001592.01.T01	comp25188_c0_seq1	97.712	306	2	2	1	301	651	346	2.07e-147	521	0.574506	1.29921	1.09771	2.62515	1.51255	0.442948	-1.74063	-0.769698	-0.91099	-0.380931	-0.661137	-2.2576
5A	285144840	TuG1812G0500001594.01	TuG1812G0500001594.01.T02	TC253429	93.316	374	17	1	1	374	554	919	2.11e-154	545	1.29264	1.03937	0.274427	1.87937	0.950743	0.710563	-0.773611	-0.962122	-3.64396	-0.532095	-1.05181	-1.40733
5A	285144840	TuG1812G0500001594.01	TuG1812G0500001594.01.T02	TC437770	95.609	501	13	9	1	494	411	909	0	806	1.12812	0.513269	0.320164	0.826095	0.864312	0.812072	-0.886429	-1.9483	-3.1234	-1.21052	-1.15699	-1.23142
5A	285144840	TuG1812G0500001594.01	TuG1812G0500001594.01.T02	comp12433_c0_seq1	98.868	265	3	0	1	265	677	941	5.48e-133	473	0.866418	0.778554	0.620727	0.811784	0.613078	1.10956	-1.15418	-1.28443	-1.61101	-1.23185	-1.63111	-0.901255
5A	285182715	TuG1812G0500001595.01	TuG1812G0500001595.01.T01	comp49688_c0_seq1	99.107	112	1	0	1	112	976	865	9.89e-52	202	NA	0	NA	NA	0.396143	0.406036	NA	NA	0	0	-2.52434	-2.46284
5A	285443469	TuG1812G0500001596.01	TuG1812G0500001596.01.T02	TC241590	95.858	507	14	4	1	500	1106	1612	0	813	0.865074	0.586593	0.923071	0.590174	0.720586	0.663434	-1.15597	-1.70476	-1.08334	-1.69442	-1.38776	-1.50731
5A	285443469	TuG1812G0500001596.01	TuG1812G0500001596.01.T02	TC256701	94.059	505	21	6	3	500	1172	1674	0	758	NA	NA	NA	NA	1.18843	0	0	0	NA	NA	-0.841447	NA
5A	285443469	TuG1812G0500001596.01	TuG1812G0500001596.01.T04	TC372916	99	500	3	2	1	500	1681	1184	0	894	0.820723	0.880821	0.719187	0.700385	1.02502	1.3318	-1.21844	-1.1353	-1.39046	-1.42779	-0.975591	-0.750864
5A	285443469	TuG1812G0500001596.01	TuG1812G0500001596.01.T02	TC390453	94.769	497	17	9	1	497	349	836	0	765	2.06822	NA	0.274427	0	1.78264	NA	-0.483507	0	-3.64396	NA	-0.560965	NA
5A	285443469	TuG1812G0500001596.01	TuG1812G0500001596.01.T02	TC422308	96	500	10	6	1	500	1136	1625	0	804	0.344704	1.53981	0.82328	0	0.891321	0.812072	-2.90104	-0.649432	-1.21465	NA	-1.12193	-1.23142
5A	285443469	TuG1812G0500001596.01	TuG1812G0500001596.01.T07	comp3459_c0_seq1	99.291	564	4	0	84	647	1589	1026	0	1020	1.14775	1.43888	1.45408	1.29251	1.16597	1.2362	-0.87127	-0.694985	-0.68772	-0.773689	-0.857653	-0.808931
5A	285443469	TuG1812G0500001596.01	TuG1812G0500001596.01.T04	comp4784_c0_seq1	98.921	278	3	0	1	278	1129	1406	3.2e-140	497	1.06244	0.879385	0.847673	0.967242	1.06166	1.08666	-0.941227	-1.13716	-1.1797	-1.03387	-0.941919	-0.920253
5A	285618885	TuG1812G0500001598.01	TuG1812G0500001598.01.T02	CA698405	95.136	514	8	17	1	498	3711	3199	0	802	1.37882	3.46456	0.41164	0.920505	1.58457	0.974487	-0.72526	-0.288637	-2.42931	-1.08636	-0.631086	-1.02618
5A	285618885	TuG1812G0500001598.01	TuG1812G0500001598.01.T02	TC393529	89.047	493	24	29	1	493	2673	3135	4.48e-166	584	NA	NA	NA	1.07392	NA	0	NA	NA	0	-0.931165	NA	NA
5A	285618885	TuG1812G0500001598.01	TuG1812G0500001598.01.T02	TC447260	99	500	5	0	1	500	1007	1506	0	896	1.50416	1.92476	1.44074	0.678267	0.565918	1.32403	-0.664822	-0.519546	-0.694088	-1.47435	-1.76704	-0.75527
5A	285618885	TuG1812G0500001598.01	TuG1812G0500001598.01.T02	TC457507	100	314	0	0	1	314	3131	3444	5.8e-165	580	NA	0	0	NA	2.37686	NA	NA	NA	NA	NA	-0.420724	NA
5A	285618885	TuG1812G0500001598.01	TuG1812G0500001598.01.T02	TC457524	100	500	0	0	1	500	2991	3490	0	924	1.55117	1.15485	0.82328	0	1.18843	4.87243	-0.644676	-0.86591	-1.21465	NA	-0.841447	-0.205236
5A	285618885	TuG1812G0500001598.01	TuG1812G0500001598.01.T02	comp1768_c0_seq1	98.301	412	2	2	17	426	3531	3123	0	717	1.5167	1.83727	0.829082	1.16051	0.710534	1.51235	-0.659328	-0.544286	-1.20615	-0.861691	-1.40739	-0.661224
5A	285613566	TuG1812G0500001599.01	TuG1812G0500001599.01.T01	TC264911	91.583	499	25	3	1	499	852	1333	0	673	3.10233	1.84777	2.19541	0	0.297107	1.62414	-0.322338	-0.541194	-0.455495	NA	-3.36579	-0.615709
5A	285613566	TuG1812G0500001599.01	TuG1812G0500001599.01.T01	TC425821	99.556	450	2	0	1	450	851	1300	0	822	1.58348	1.06172	1.17089	1.49415	0.941773	0.767575	-0.631519	-0.941867	-0.854054	-0.669275	-1.06183	-1.3028
5A	285885497	TuG1812G0500001601.01	TuG1812G0500001601.01.T02	CK125337	96.781	497	14	2	1	496	902	1397	0	832	NA	0	NA	1.07392	0	NA	0	NA	0	-0.931165	NA	NA
5A	285885497	TuG1812G0500001601.01	TuG1812G0500001601.01.T02	TC244393	92.807	431	30	1	1	430	1226	1656	9.49e-178	623	1.03411	2.88714	0.82328	3.22177	2.773	1.21811	-0.967014	-0.346364	-1.21465	-0.310388	-0.36062	-0.820945
5A	285885497	TuG1812G0500001601.01	TuG1812G0500001601.01.T02	TC421485	95.858	338	14	0	1	338	1320	1657	5.88e-155	547	3.21724	1.69379	1.20748	0.872562	0.631353	0.943051	-0.310826	-0.590393	-0.828173	-1.14605	-1.5839	-1.06039
5A	285885497	TuG1812G0500001601.01	TuG1812G0500001601.01.T02	TC432017	97.546	489	10	1	1	487	1169	1657	0	835	1.47985	1.62917	1.17255	1.24238	0.859105	0.918266	-0.675745	-0.61381	-0.852842	-0.804906	-1.164	-1.08901
5A	285885497	TuG1812G0500001601.01	TuG1812G0500001601.01.T02	TC447003	99.799	498	1	0	1	498	428	925	0	915	2.06822	0.673665	1.73804	0.61367	1.03987	0.913581	-0.483507	-1.48442	-0.575362	-1.62954	-0.961654	-1.09459
5A	285885497	TuG1812G0500001601.01	TuG1812G0500001601.01.T02	comp3995_c0_seq1	99.528	212	1	0	8	219	1651	1440	5.6e-107	387	1.82726	1.70918	1.13871	0.912484	0.802067	1.01146	-0.547266	-0.585074	-0.878185	-1.09591	-1.24678	-0.988665
5A	285894814	TuG1812G0500001602.01	TuG1812G0500001602.01.T01	TC381547	96.258	481	18	0	1	481	884	1364	0	789	NA	NA	NA	2.14785	NA	NA	NA	NA	NA	-0.465583	NA	NA
5A	285894814	TuG1812G0500001602.01	TuG1812G0500001602.01.T01	comp5827_c0_seq1	98.503	334	5	0	1	334	1047	1380	6.95e-168	590	1.23853	1.19094	0.965771	1.05391	0.833767	1.01878	-0.80741	-0.83967	-1.03544	-0.948846	-1.19938	-0.981565
5A	286060261	TuG1812G0500001603.01	TuG1812G0500001603.01.T01	comp35346_c0_seq1	100	72	0	0	66	137	1	72	8.42e-31	134	1.03411	1.15485	0.960493	0.715949	0.713057	0.609054	-0.967014	-0.86591	-1.04113	-1.39675	-1.40241	-1.64189
5A	286356853	TuG1812G0500001604.01	TuG1812G0500001604.01.T01	TC445104	98.6	500	3	4	1	500	2354	2849	0	881	1.29264	0.721784	0.777542	0.653692	0.486175	0.487243	-0.773611	-1.38546	-1.2861	-1.52977	-2.05687	-2.05236
5A	287336993	TuG1812G0500001608.01	TuG1812G0500001608.01.T01	TC273279	93.035	402	24	2	2	401	335	734	4.48e-166	584	2.21595	3.07961	0.548853	0.2322	0	1.82716	-0.451273	-0.324716	-1.82198	-4.30664	NA	-0.547297
5A	287336993	TuG1812G0500001608.01	TuG1812G0500001608.01.T01	TC372943	97.196	214	4	1	1	214	595	806	8.22e-99	361	1.03411	0.288714	NA	0.429569	0.139815	1.21811	-0.967014	-3.46364	0	-2.32791	-7.1523	-0.820945
5A	287336993	TuG1812G0500001608.01	TuG1812G0500001608.01.T01	comp5093_c0_seq1	99.346	306	2	0	1	306	527	832	2.17e-157	555	1.77618	2.38558	0.48971	0.455512	0.171119	1.33142	-0.563005	-0.419186	-2.04203	-2.19533	-5.8439	-0.751078
5A	287835282	TuG1812G0500001609.01	TuG1812G0500001609.01.T01	GH726326	98.8	500	3	1	1	500	497	1	0	887	0	1.15485	NA	0	2.37686	0.406036	NA	-0.86591	NA	NA	-0.420724	-2.46284
5A	289034840	TuG1812G0500001613.01	TuG1812G0500001613.01.T02	BJ239974	99.4	500	3	0	1	500	2026	1527	0	907	NA	NA	NA	0	0.792286	0.812072	NA	0	0	NA	-1.26217	-1.23142
5A	289034840	TuG1812G0500001613.01	TuG1812G0500001613.01.T01	TC435345	95.973	447	6	2	1	447	1938	2372	0	715	1.23853	1.01826	1.01276	0.536962	1.05463	0.921194	-0.80741	-0.982069	-0.987396	-1.86233	-0.948198	-1.08555
5A	289222804	TuG1812G0500001614.01	TuG1812G0500001614.01.T01	BY839818	91.241	411	18	1	1	411	87	479	1.72e-154	545	2.06822	NA	NA	NA	1.18843	0.609054	-0.483507	NA	0	0	-0.841447	-1.64189
5A	289222804	TuG1812G0500001614.01	TuG1812G0500001614.01.T01	TC243528	85.859	297	20	7	1	291	1354	1634	2.35e-79	296	3.10233	0.769903	1.37213	0.805442	0.540195	0.304527	-0.322338	-1.29886	-0.728792	-1.24155	-1.85118	-3.28378
5A	289222804	TuG1812G0500001614.01	TuG1812G0500001614.01.T01	TC385227	91.502	506	11	6	1	484	1099	1594	0	667	1.03411	0	NA	0	1.18843	0.203018	-0.967014	NA	NA	NA	-0.841447	-4.92567
5A	289222804	TuG1812G0500001614.01	TuG1812G0500001614.01.T01	TC405381	98.4	500	7	1	1	500	999	1497	0	878	1.66085	2.02974	0.607659	0.568548	0.347181	1.12984	-0.602103	-0.492673	-1.64566	-1.75887	-2.88034	-0.885082
5A	289570669	TuG1812G0500001615.01	TuG1812G0500001615.01.T01	TC373783	98.795	498	6	0	3	500	1150	1647	0	887	1.19739	1.08268	2.54825	1.07392	1.28746	1.41698	-0.835148	-0.923637	-0.392427	-0.931165	-0.776721	-0.705725
5A	289570669	TuG1812G0500001615.01	TuG1812G0500001615.01.T01	comp14844_c0_seq1	100	214	0	0	1	214	1492	1705	1.19e-109	396	0.890485	0.801328	2.14552	1.10551	1.14946	1.21811	-1.12298	-1.24793	-0.466088	-0.904561	-0.869971	-0.820945
5A	289828490	TuG1812G0500001617.01	TuG1812G0500001617.01.T01	TC417336	97.286	479	12	1	1	478	1381	1859	0	811	1.59817	1.31983	4.25361	0.840462	0.990357	3.65432	-0.625715	-0.757671	-0.235094	-1.18982	-1.00974	-0.273648
5A	290792655	TuG1812G0500001618.01	TuG1812G0500001618.01.T01	TC270818	95.4	500	21	2	1	500	1387	1884	0	795	NA	NA	0	2.14785	NA	0	NA	0	NA	-0.465583	NA	NA
5A	290792655	TuG1812G0500001618.01	TuG1812G0500001618.01.T01	TC377187	99.589	487	2	0	1	487	1705	2191	0	889	2.16223	1.69379	0.777542	1.03097	0.688038	1.59877	-0.462485	-0.590393	-1.2861	-0.969964	-1.45341	-0.625482
5A	290792655	TuG1812G0500001618.01	TuG1812G0500001618.01.T01	comp21724_c0_seq1	99.744	391	1	0	1	391	1801	2191	0	717	1.32519	1.28317	0.832582	0.881168	0.889989	1.16688	-0.754606	-0.779319	-1.20108	-1.13486	-1.12361	-0.856987
5A	291470285	TuG1812G0500001620.01	TuG1812G0500001620.01.T01	TC262728	93.613	501	20	7	4	500	851	359	0	737	1.65458	0.615922	1.92099	0.165219	2.85223	0.541381	-0.604384	-1.62358	-0.520566	-6.05258	-0.350603	-1.84713
5A	291470285	TuG1812G0500001620.01	TuG1812G0500001620.01.T01	TC389153	97.012	502	8	5	1	500	840	344	0	837	NA	0.577427	1.09771	1.07392	NA	NA	0	-1.73182	-0.91099	-0.931165	NA	0
5A	291470285	TuG1812G0500001620.01	TuG1812G0500001620.01.T01	comp1563_c0_seq1	98.526	407	5	1	10	415	294	700	0	717	1.49096	1.20433	1.19289	0.649349	0.846755	0.866437	-0.670708	-0.83034	-0.8383	-1.54	-1.18098	-1.15415
5A	292690503	TuG1812G0500001629.01	TuG1812G0500001629.01.T02	TC369055	99.573	468	2	0	1	468	1026	1493	0	854	1.14901	0.989875	0.914755	1.28871	1.10354	0.890156	-0.870313	-1.01023	-1.09319	-0.775971	-0.906174	-1.1234
5A	292722274	TuG1812G0500001631.01	TuG1812G0500001631.01.T03	TC276949	89.863	365	20	5	1	365	1875	2222	1.32e-126	453	0	1.15485	NA	0	0	2.43622	NA	-0.86591	0	NA	NA	-0.410473
5A	292722274	TuG1812G0500001631.01	TuG1812G0500001631.01.T03	TC388784	96.757	370	2	1	1	370	1863	2222	2.66e-173	608	1.20646	0.835427	1.00623	0.618871	0.630595	1.36141	-0.828869	-1.19699	-0.993808	-1.61585	-1.5858	-0.73453
5A	292722274	TuG1812G0500001631.01	TuG1812G0500001631.01.T03	TC411383	95.766	496	18	1	1	496	1358	1850	0	797	NA	0	0.274427	0	0	0	NA	NA	-3.64396	NA	NA	NA
5A	293187820	TuG1812G0500001632.01	TuG1812G0500001632.01.T01	TC386007	94.866	409	12	3	1	409	1168	1567	5.67e-180	630	NA	NA	NA	NA	NA	3.65432	0	NA	0	NA	0	-0.273648
5A	293342645	TuG1812G0500001633.01	TuG1812G0500001633.01.T01	TC269160	91.833	502	28	8	1	496	1134	1628	0	688	NA	NA	0	0	0	2.43622	0	0	NA	NA	NA	-0.410473
5A	293342645	TuG1812G0500001633.01	TuG1812G0500001633.01.T01	TC417410	96.192	499	16	3	1	498	973	1469	0	813	NA	0	0.548853	NA	0.594214	1.21811	0	NA	-1.82198	0	-1.68289	-0.820945
5A	293342645	TuG1812G0500001633.01	TuG1812G0500001633.01.T01	comp10242_c0_seq1	97.964	442	6	2	1	442	1707	1269	0	763	1.39909	1.07786	0.903321	0.631719	0.895892	0.962698	-0.714749	-0.927761	-1.10703	-1.58298	-1.11621	-1.03875
5A	293354354	TuG1812G0500001635.01	TuG1812G0500001635.01.T01	AL819056	99.2	500	3	1	1	500	593	1091	0	902	5.5842	1.25984	NA	0.214785	0.396143	1.43958	-0.179077	-0.793751	0	-4.65583	-2.52434	-0.694646
5A	294260063	TuG1812G0500001638.01	TuG1812G0500001638.01.T02	TC371139	96.809	470	9	2	1	470	1371	1834	0	780	1.29264	1.25528	1.00623	0.976294	1.08939	0.885897	-0.773611	-0.796637	-0.993808	-1.02428	-0.917943	-1.1288
5A	294260063	TuG1812G0500001638.01	TuG1812G0500001638.01.T02	TC410397	96.97	462	14	0	1	462	1306	1767	0	776	3.10233	2.54068	0.82328	0.859138	1.03987	1.91417	-0.322338	-0.393595	-1.21465	-1.16396	-0.961654	-0.52242
5A	294260063	TuG1812G0500001638.01	TuG1812G0500001638.01.T02	comp26446_c0_seq1	98.266	173	3	0	25	197	1601	1773	5.98e-82	303	1.53719	1.75739	1.43312	0.791312	0.891321	0.67933	-0.650537	-0.569027	-0.69778	-1.26372	-1.12193	-1.47204
5A	294427694	TuG1812G0500001639.01	TuG1812G0500001639.01.T01	TC400893	97.39	498	12	1	1	498	2128	2624	0	846	0.517056	1.73228	NA	1.4319	0.237686	3.04527	-1.93403	-0.577273	0	-0.698374	-4.20724	-0.328378
5A	294427694	TuG1812G0500001639.01	TuG1812G0500001639.01.T01	TC437766	96.242	479	14	4	1	476	2198	2675	0	797	4.25811	3.56955	0.64571	1.31885	1.02451	1.24403	-0.234846	-0.280147	-1.54868	-0.758235	-0.976079	-0.803842
5A	294427694	TuG1812G0500001639.01	TuG1812G0500001639.01.T01	TC443059	98.2	500	9	0	1	500	1295	1794	0	876	NA	1.15485	0.548853	0	0	0	0	-0.86591	-1.82198	NA	NA	NA
5A	294434729	TuG1812G0500001640.01	TuG1812G0500001640.01.T01	TC391466	98.793	497	6	0	1	497	339	835	0	885	0.517056	2.30971	1.09771	1.4319	0.297107	1.21811	-1.93403	-0.432955	-0.91099	-0.698374	-3.36579	-0.820945
5A	294965421	TuG1812G0500001644.01	TuG1812G0500001644.01.T01	TC373338	93.484	399	15	6	1	398	1603	1991	1.61e-165	582	NA	0	NA	0.715949	0	1.01509	0	NA	0	-1.39675	NA	-0.985134
5A	294965421	TuG1812G0500001644.01	TuG1812G0500001644.01.T04	comp5828_c0_seq1	94.915	354	11	3	31	377	1884	1531	4.36e-155	547	0.775583	0.694288	0.711956	1.11973	0.808565	0.915245	-1.28935	-1.44033	-1.40458	-0.893072	-1.23676	-1.0926
5A	295199267	TuG1812G0500001646.01	TuG1812G0500001646.01.T01	BJ454284	96.2	500	19	0	1	500	1041	1540	0	819	NA	NA	NA	NA	NA	1.21811	NA	NA	NA	NA	NA	-0.820945
5A	295199267	TuG1812G0500001646.01	TuG1812G0500001646.01.T01	CA497516	98.6	500	7	0	1	500	867	1366	0	885	1.03411	0	NA	0	1.78264	0.304527	-0.967014	NA	0	NA	-0.560965	-3.28378
5A	295199267	TuG1812G0500001646.01	TuG1812G0500001646.01.T01	TC244647	95.102	490	16	2	1	482	2492	2981	0	765	1.04888	0.809589	1.70373	1.12506	0.911426	1.04945	-0.953394	-1.2352	-0.586947	-0.88884	-1.09718	-0.952883
5A	295199267	TuG1812G0500001646.01	TuG1812G0500001646.01.T01	TC378458	98.807	503	3	2	1	500	2554	3056	0	893	0.886381	1.79644	0.509649	0.444382	0.806434	1.45013	-1.12818	-0.556656	-1.96213	-2.25032	-1.24003	-0.689594
5A	295199267	TuG1812G0500001646.01	TuG1812G0500001646.01.T01	comp11702_c0_seq1	100	422	0	0	1	422	2643	3064	0	780	1.11216	0.847712	0.98392	0.959676	1.23522	1.25163	-0.899153	-1.17965	-1.01634	-1.04202	-0.809574	-0.798956
5A	295322255	TuG1812G0500001647.01	TuG1812G0500001647.01.T01	TC422512	99.203	502	1	3	1	499	59	560	0	902	1.72352	1.29921	0.754673	0.429569	1.18843	0.507545	-0.580208	-0.769698	-1.32508	-2.32791	-0.841447	-1.97027
5A	295322255	TuG1812G0500001647.01	TuG1812G0500001647.01.T01	TC448439	98.608	431	6	0	1	431	233	663	0	763	1.29264	2.88714	3.29312	0.536962	0.950743	1.01509	-0.773611	-0.346364	-0.303663	-1.86233	-1.05181	-0.985134
5A	295322255	TuG1812G0500001647.01	TuG1812G0500001647.01.T01	comp6394_c0_seq1	98.655	223	3	0	115	337	672	450	1.48e-109	396	1.38171	1.3557	0.928061	0.758063	0.785656	1.46611	-0.72374	-0.737627	-1.07752	-1.31915	-1.27282	-0.682079
5A	295379482	TuG1812G0500001649.01	TuG1812G0500001649.01.T04	TC256161	94	500	21	1	1	500	2191	2681	0	749	0.344704	NA	NA	0	0.792286	1.82716	-2.90104	NA	0	NA	-1.26217	-0.547297
5A	295379482	TuG1812G0500001649.01	TuG1812G0500001649.01.T04	TC379261	98.2	500	9	0	1	500	2283	2782	0	874	2.68869	1.73228	1.18918	0.954598	0.8319	1.82716	-0.371928	-0.577273	-0.840914	-1.04756	-1.20207	-0.547297
5A	295379482	TuG1812G0500001649.01	TuG1812G0500001649.01.T01	comp18163_c0_seq1	96.437	449	9	2	1	442	2636	3084	0	734	0.868653	0.95401	0.661852	0.657504	0.581571	1.0789	-1.15121	-1.04821	-1.51091	-1.5209	-1.71948	-0.926874
5A	295476995	TuG1812G0500001651.01	TuG1812G0500001651.01.T01	BJ233467	98.881	268	3	0	1	268	838	1105	2.17e-134	479	NA	NA	NA	2.14785	NA	NA	NA	NA	NA	-0.465583	NA	NA
5A	295476995	TuG1812G0500001651.01	TuG1812G0500001651.01.T01	TC396515	97.206	501	10	3	1	500	1339	1836	0	845	NA	0	NA	0	2.37686	0.406036	0	NA	0	NA	-0.420724	-2.46284
5A	295614255	TuG1812G0500001652.01	TuG1812G0500001652.01.T01	TC246509	87.629	388	31	3	1	375	1080	1463	4.78e-121	435	NA	NA	NA	NA	NA	2.43622	0	NA	0	0	0	-0.410473
5A	295614255	TuG1812G0500001652.01	TuG1812G0500001652.01.T01	TC384766	100	500	0	0	1	500	893	1392	0	924	1.03411	0.384951	1.71517	0.715949	1.42611	0.535968	-0.967014	-2.59773	-0.583034	-1.39675	-0.701206	-1.86578
5A	295614255	TuG1812G0500001652.01	TuG1812G0500001652.01.T01	comp21975_c0_seq1	98.684	304	3	1	1	304	1161	1463	2.12e-152	538	0.890485	0.832828	1.21878	0.659696	0.510466	0.818896	-1.12298	-1.20073	-0.820495	-1.51585	-1.95899	-1.22116
5A	295703418	TuG1812G0500001655.01	TuG1812G0500001655.01.T03	TC247693	92.008	488	39	0	1	488	2183	2670	0	686	NA	NA	NA	0	1.18843	NA	NA	NA	0	NA	-0.841447	NA
5A	295703418	TuG1812G0500001655.01	TuG1812G0500001655.01.T03	TC378820	99.599	499	1	1	1	499	2300	2797	0	909	1.03411	0.769903	1.55508	0.55844	0.627226	1.21811	-0.967014	-1.29886	-0.643052	-1.7907	-1.59432	-0.820945
5A	295709627	TuG1812G0500001656.01	TuG1812G0500001656.01.T03	TC376103	99.8	500	1	0	1	500	1268	1767	0	918	2.38641	0.866141	0.377337	0.263771	0.696665	0.493828	-0.419039	-1.15455	-2.65015	-3.79117	-1.43541	-2.025
5A	295709627	TuG1812G0500001656.01	TuG1812G0500001656.01.T01	TC384596	89.565	345	15	11	1	329	1553	1892	4.81e-116	418	0.517056	3.46456	NA	1.07392	0.713057	1.21811	-1.93403	-0.288637	0	-0.931165	-1.40241	-0.820945
5A	295709627	TuG1812G0500001656.01	TuG1812G0500001656.01.T03	comp17202_c0_seq1	99.01	202	0	1	1	202	1491	1690	3.31e-99	361	1.85278	1.25675	1.04781	0.805442	1.49654	1.45387	-0.539729	-0.795701	-0.954371	-1.24155	-0.668208	-0.687819
5A	295825385	TuG1812G0500001660.01	TuG1812G0500001660.01.T01	TC373517	99.598	498	2	0	1	498	333	830	0	909	1.24093	4.04199	NA	0.536962	3.56529	1.21811	-0.805845	-0.247403	0	-1.86233	-0.280482	-0.820945
5A	296226645	TuG1812G0500001665.01	TuG1812G0500001665.01.T02	comp2870_c0_seq3	96.279	215	8	0	1	215	445	659	6.83e-97	353	0.425811	1.03937	3.29312	1.07392	1.00559	0.812072	-2.34846	-0.962122	-0.303663	-0.931165	-0.994438	-1.23142
5A	296226645	TuG1812G0500001665.01	TuG1812G0500001665.01.T02	comp31810_c0_seq1	96.313	217	8	0	11	227	1101	885	5.8e-98	357	NA	1.38583	0.219541	1.19325	1.01865	0.974487	0	-0.721592	-4.55495	-0.838049	-0.981689	-1.02618
5A	296357378	TuG1812G0500001666.01	TuG1812G0500001666.01.T01	TC431501	98.585	212	3	0	7	218	1042	1253	2.79e-103	375	3.10233	0.384951	1.64656	4.29569	NA	0.730865	-0.322338	-2.59773	-0.607327	-0.232791	0	-1.36824
5A	296427969	TuG1812G0500001669.01	TuG1812G0500001669.01.T04	BE488637	99.8	500	1	0	1	500	1033	1532	0	918	0.517056	NA	NA	2.14785	NA	NA	-1.93403	0	0	-0.465583	NA	0
5A	296427969	TuG1812G0500001669.01	TuG1812G0500001669.01.T01	TC245621	94.048	504	24	6	1	499	1431	1933	0	760	1.03411	NA	0.82328	0	0	1.21811	-0.967014	0	-1.21465	NA	NA	-0.820945
5A	296427969	TuG1812G0500001669.01	TuG1812G0500001669.01.T01	TC392908	96.607	501	14	3	1	499	1715	2214	0	828	2.75763	6.92913	1.37213	0.536962	0	8.52676	-0.36263	-0.144318	-0.728792	-1.86233	NA	-0.117278
5A	296427969	TuG1812G0500001669.01	TuG1812G0500001669.01.T01	comp10249_c0_seq1	99.475	381	2	0	15	395	1859	2239	0	693	1.26304	1.32744	1.63467	0.882869	0.998129	1.18978	-0.791743	-0.753332	-0.611742	-1.13267	-1.00187	-0.840491
5A	296995316	TuG1812G0500001673.01	TuG1812G0500001673.01.T01	TC241584	90.625	512	30	9	1	498	1357	1864	0	664	1.16338	1.16844	0.722657	0.692281	0.801718	1.42376	-0.859568	-0.855841	-1.38378	-1.4445	-1.24732	-0.702364
5A	296995316	TuG1812G0500001673.01	TuG1812G0500001673.01.T01	TC376629	97.036	506	8	3	1	500	1362	1866	0	845	NA	0.577427	NA	0	1.78264	0	NA	-1.73182	0	NA	-0.560965	NA
5A	296995316	TuG1812G0500001673.01	TuG1812G0500001673.01.T01	TC384484	100	500	0	0	1	500	1364	1863	0	924	NA	1.73228	NA	0	0.792286	0.609054	0	-0.577273	0	NA	-1.26217	-1.64189
5A	296995316	TuG1812G0500001673.01	TuG1812G0500001673.01.T02	TC412260	97.395	499	12	1	1	499	722	1219	0	848	1.03411	1.15485	0.82328	0.429569	1.18843	1.39212	-0.967014	-0.86591	-1.21465	-2.32791	-0.841447	-0.718327
5A	296995316	TuG1812G0500001673.01	TuG1812G0500001673.01.T01	comp9391_c0_seq1	100	402	0	0	4	405	1895	1494	0	743	1.18462	1.26087	0.798175	0.768661	0.722781	1.08194	-0.844156	-0.793101	-1.25286	-1.30096	-1.38355	-0.924265
5A	297081370	TuG1812G0500001674.01	TuG1812G0500001674.01.T01	TC369981	99.602	502	0	1	1	500	1351	1852	0	915	1.55117	1.15485	0.274427	0	0.297107	1.82716	-0.644676	-0.86591	-3.64396	NA	-3.36579	-0.547297
5A	297081370	TuG1812G0500001674.01	TuG1812G0500001674.01.T01	comp34295_c0_seq1	100	32	0	0	95	126	1792	1761	9.48e-09	60.2	1.03411	2.30971	NA	0	1.18843	NA	-0.967014	-0.432955	0	NA	-0.841447	0
5A	297237965	TuG1812G0500001675.01	TuG1812G0500001675.01.T01	CK210711	92.262	504	22	15	1	490	630	1130	0	702	1.29264	0.824896	0.640329	1.07392	0.396143	0.696062	-0.773611	-1.21227	-1.5617	-0.931165	-2.52434	-1.43665
5A	297237965	TuG1812G0500001675.01	TuG1812G0500001675.01.T01	TC407519	99.598	498	2	0	1	498	955	1452	0	909	0.780461	0.671427	0.94605	0.94584	0.872622	0.697029	-1.28129	-1.48937	-1.05703	-1.05726	-1.14597	-1.43466
5A	297237965	TuG1812G0500001675.01	TuG1812G0500001675.01.T01	comp2757_c0_seq1	99.213	254	2	0	1	254	1098	845	1.44e-128	459	0.463258	0.667703	1.21468	1.04171	1.26329	0.803074	-2.15862	-1.49767	-0.823265	-0.959964	-0.791584	-1.24522
5A	297221692	TuG1812G0500001676.01	TuG1812G0500001676.01.T01	TC238646	93.696	349	20	2	1	349	687	1033	3.56e-147	521	1.03411	0	NA	0.61367	0.198071	0.406036	-0.967014	NA	0	-1.62954	-5.04868	-2.46284
5A	297221692	TuG1812G0500001676.01	TuG1812G0500001676.01.T01	TC392329	97.8	500	11	0	1	500	787	1286	0	863	0.387792	0.144357	NA	0.536962	1.90149	0.365432	-2.5787	-6.92728	0	-1.86233	-0.525905	-2.73648
5A	297467138	TuG1812G0500001679.01	TuG1812G0500001679.01.T02	comp10095_c0_seq2	98.777	327	4	0	57	383	514	188	1.61e-165	582	1.34434	1.3557	1.05438	0.785234	0.837994	1.06852	-0.743857	-0.737627	-0.948428	-1.27351	-1.19333	-0.935878
5A	297716805	TuG1812G0500001681.01	TuG1812G0500001681.01.T01	comp5765_c0_seq1	93.789	322	20	0	1	322	913	1234	3.26e-136	484	1.22975	1.11905	0.85595	0.818227	1.24286	1.46586	-0.813171	-0.893619	-1.16829	-1.22215	-0.804596	-0.682194
5A	299207121	TuG1812G0500001689.01	TuG1812G0500001689.01.T01	TC275448	95.821	335	14	0	1	335	840	1174	2.29e-153	542	NA	NA	NA	NA	1.18843	0	NA	0	0	NA	-0.841447	NA
5A	299218800	TuG1812G0500001690.01	TuG1812G0500001690.01.T01	TC247307	98.571	490	5	1	1	490	4631	4144	0	865	1.08199	1.10674	0.792016	0.849148	0.890012	1.12604	-0.924226	-0.903558	-1.2626	-1.17765	-1.12358	-0.888066
5A	299218800	TuG1812G0500001690.01	TuG1812G0500001690.01.T01	TC397477	98.221	506	2	2	1	500	4719	5223	0	878	1.55117	1.53981	0.686067	0.402721	0.731341	0.730865	-0.644676	-0.649432	-1.45758	-2.48311	-1.36735	-1.36824
5A	299218800	TuG1812G0500001690.01	TuG1812G0500001690.01.T01	comp27780_c0_seq1	100	121	0	0	1	121	5030	5150	2.7e-58	224	1.1582	0.962379	0.627261	1.49944	0.706168	0.64289	-0.863405	-1.03909	-1.59423	-0.666916	-1.41609	-1.55548
5A	299246530	TuG1812G0500001691.01	TuG1812G0500001691.01.T01	BI954651	90.191	418	32	7	17	428	1381	1795	1.27e-151	536	0.344704	0.577427	0	0.715949	0.594214	0.406036	-2.90104	-1.73182	NA	-1.39675	-1.68289	-2.46284
5A	299246530	TuG1812G0500001691.01	TuG1812G0500001691.01.T01	TC385747	99.588	485	2	0	1	485	1465	1949	0	885	0.689408	0.384951	NA	0	1.18843	3.65432	-1.45052	-2.59773	0	NA	-0.841447	-0.273648
5A	299246530	TuG1812G0500001691.01	TuG1812G0500001691.01.T01	TC444475	97.154	492	14	0	1	492	1480	1971	0	835	0	3.46456	0.82328	0.715949	NA	0	NA	-0.288637	-1.21465	-1.39675	NA	NA
5A	299246530	TuG1812G0500001691.01	TuG1812G0500001691.01.T02	TC457228	96.4	500	18	0	1	500	554	1053	0	824	NA	NA	NA	0	1.18843	0	NA	NA	NA	NA	-0.841447	NA
5A	299246530	TuG1812G0500001691.01	TuG1812G0500001691.01.T01	comp6082_c0_seq1	98.529	408	5	1	1	407	1642	2049	0	719	1.60862	1.23249	0.567564	0.806657	0.546339	1.15437	-0.621652	-0.811364	-1.76192	-1.23968	-1.83036	-0.866273
5A	300491991	TuG1812G0500001694.01	TuG1812G0500001694.01.T01	TC408512	99.4	500	1	2	1	500	882	1379	0	905	3.10233	NA	NA	0.715949	NA	0	-0.322338	0	0	-1.39675	NA	NA
5A	300491991	TuG1812G0500001694.01	TuG1812G0500001694.01.T01	comp8128_c0_seq1	97.568	370	9	0	54	423	1454	1085	0	634	1.04688	1.49539	1.4819	1.23079	1.14041	1.53205	-0.955221	-0.668723	-0.674808	-0.812487	-0.876877	-0.652719
5A	300504189	TuG1812G0500001695.01	TuG1812G0500001695.01.T01	TC436036	97.015	469	12	2	1	469	900	1366	0	787	0.517056	2.30971	2.46984	0.920505	0.792286	2.43622	-1.93403	-0.432955	-0.404885	-1.08636	-1.26217	-0.410473
5A	300510650	TuG1812G0500001696.01	TuG1812G0500001696.01.T01	TC251029	94.523	493	18	5	1	491	1373	1858	0	752	1.12029	2.021	0.784076	0.859138	1.45252	0.609054	-0.892628	-0.494806	-1.27539	-1.16396	-0.688457	-1.64189
5A	300510650	TuG1812G0500001696.01	TuG1812G0500001696.01.T01	TC387523	96.4	500	10	2	1	500	1447	1938	0	817	1.03411	1.53981	1.09771	0.715949	2.37686	0.913581	-0.967014	-0.649432	-0.91099	-1.39675	-0.420724	-1.09459
5A	300510650	TuG1812G0500001696.01	TuG1812G0500001696.01.T01	comp4524_c0_seq1	98.98	392	4	0	17	408	1965	1574	0	702	0.775583	0.543461	0.916702	0.588207	0.488464	0.579176	-1.28935	-1.84006	-1.09087	-1.70008	-2.04723	-1.72659
5A	300685009	TuG1812G0500001699.01	TuG1812G0500001699.01.T01	TC411291	99.4	500	3	0	1	500	1757	2256	0	907	3.00539	2.25124	0.712546	0.818646	0.591198	1.30804	-0.332736	-0.444201	-1.40342	-1.22153	-1.69148	-0.764505
5A	300685009	TuG1812G0500001699.01	TuG1812G0500001699.01.T01	comp9779_c0_seq1	99.338	151	1	0	174	324	2257	2107	6.93e-73	274	2.60161	2.68629	0.713509	0.741749	0.767332	1.23666	-0.384378	-0.37226	-1.40152	-1.34817	-1.30322	-0.808631
5A	300837669	TuG1812G0500001701.01	TuG1812G0500001701.01.T01	TC239261	91.886	493	30	3	1	483	3227	3719	0	680	1.03411	NA	NA	NA	NA	NA	-0.967014	NA	NA	NA	NA	NA
5A	300837669	TuG1812G0500001701.01	TuG1812G0500001701.01.T01	TC369936	99	500	5	0	1	500	3236	3735	0	896	1.60041	1.37694	1.27412	0.739422	1.27985	1.21811	-0.62484	-0.726247	-0.784853	-1.35241	-0.781344	-0.820945
5A	300837669	TuG1812G0500001701.01	TuG1812G0500001701.01.T01	comp2881_c0_seq1	99.003	301	2	1	1	301	3443	3742	2.33e-152	538	1.62971	1.29542	1.08137	0.794189	0.777215	1.03183	-0.613607	-0.77195	-0.924752	-1.25915	-1.28665	-0.969148
5A	301559668	TuG1812G0500001704.01	TuG1812G0500001704.01.T01	TC255523	89.844	512	24	13	1	499	1173	1669	1.58e-180	632	NA	1.15485	0	NA	0	NA	NA	-0.86591	NA	NA	NA	NA
5A	301668873	TuG1812G0500001705.01	TuG1812G0500001705.01.T01	TC383687	94.262	488	10	4	1	479	1921	2399	0	730	0	NA	NA	NA	2.37686	NA	NA	NA	NA	NA	-0.420724	NA
5A	301668873	TuG1812G0500001705.01	TuG1812G0500001705.01.T01	comp10799_c0_seq1	96.244	426	11	4	19	440	2533	2109	0	693	0.922315	1.02412	0.507689	0.594493	0.789039	0.701335	-1.08423	-0.976452	-1.96971	-1.68211	-1.26737	-1.42585
5A	301893373	TuG1812G0500001706.01	TuG1812G0500001706.01.T01	comp4036_c0_seq1	88.462	390	16	11	1	362	840	1228	5.96e-124	444	1.19897	0.905006	0.710281	0.815849	0.819923	1.20678	-0.834049	-1.10496	-1.40789	-1.22572	-1.21963	-0.828654
5A	301964663	TuG1812G0500001709.01	TuG1812G0500001709.01.T01	comp12737_c0_seq1	100	331	0	0	1	331	697	1027	2.53e-174	612	1.32957	0.6686	0.658624	0.886413	0.696665	1.20045	-0.752122	-1.49566	-1.51832	-1.12814	-1.43541	-0.833018
5A	301981749	TuG1812G0500001711.01	TuG1812G0500001711.01.T01	comp10511_c0_seq1	87.172	343	38	4	3	341	385	725	3.84e-106	385	0.227	0.0378641	0	0.0271879	0.039179	0	-4.40529	-26.4103	NA	-36.781	-25.5239	NA
5A	301981749	TuG1812G0500001711.01	TuG1812G0500001711.01.T01	comp17460_c0_seq1	98.039	102	2	0	268	369	993	1094	6.43e-44	178	1.4219	0.831495	0.571722	0.373538	0.580395	0.696062	-0.703283	-1.20265	-1.7491	-2.6771	-1.72296	-1.43665
5A	301981749	TuG1812G0500001711.01	TuG1812G0500001711.01.T01	comp7909_c0_seq1	98.387	310	3	1	1	310	1483	1790	5.89e-154	544	2.75763	0.962379	0.470446	1.20816	0.67172	1.06584	-0.36263	-1.03909	-2.12564	-0.827703	-1.48871	-0.938223
5A	301981749	TuG1812G0500001711.01	TuG1812G0500001711.01.T01	comp7909_c0_seq2	98.377	308	4	1	1	307	1483	1790	7.25e-153	540	0.387792	1.03937	0.686067	0.357974	0.924333	1.62414	-2.5787	-0.962122	-1.45758	-2.7935	-1.08186	-0.615709
5A	301984714	TuG1812G0500001712.01	TuG1812G0500001712.01.T04	comp13175_c0_seq1	97.701	87	2	0	278	364	443	529	1.42e-35	150	0.620467	0.494938	0.274427	0.429569	0.396143	1.46173	-1.61169	-2.02046	-3.64396	-2.32791	-2.52434	-0.684121
5A	301984714	TuG1812G0500001712.01	TuG1812G0500001712.01.T04	comp13175_c0_seq2	96.97	132	2	1	27	158	400	529	4.42e-57	220	NA	NA	NA	0	1.18843	0	NA	NA	0	NA	-0.841447	NA
5A	301984714	TuG1812G0500001712.01	TuG1812G0500001712.01.T06	comp40876_c0_seq1	88.535	157	5	5	1	157	95	238	2.9e-44	178	1.03411	0.577427	0	2.14785	NA	0	-0.967014	-1.73182	NA	-0.465583	NA	NA
5A	302103949	TuG1812G0500001715.01	TuG1812G0500001715.01.T02	CB610949	76.378	254	60	0	1	254	209	462	1.51e-31	137	1.03411	NA	NA	NA	NA	NA	-0.967014	0	NA	NA	NA	NA
5A	302103949	TuG1812G0500001715.01	TuG1812G0500001715.01.T01	TC38076	76.632	291	68	0	10	300	153	443	8.95e-39	161	NA	1.15485	NA	NA	NA	NA	NA	-0.86591	NA	NA	NA	NA
5A	302103949	TuG1812G0500001715.01	TuG1812G0500001715.01.T01	TC392492	99.598	498	2	0	1	498	176	673	0	909	1.18184	0.621845	0.10291	0.429569	0.848877	2.43622	-0.846137	-1.60812	-9.71723	-2.32791	-1.17803	-0.410473
5A	302103949	TuG1812G0500001715.01	TuG1812G0500001715.01.T01	comp12630_c0_seq1	99.329	149	1	0	1	149	650	798	5.52e-72	270	0.413645	2.30971	0.82328	1.4319	0.792286	0.304527	-2.41753	-0.432955	-1.21465	-0.698374	-1.26217	-3.28378
5A	302103949	TuG1812G0500001715.01	TuG1812G0500001715.01.T01	comp4720_c0_seq1	99.071	323	3	0	19	341	673	351	3.99e-165	580	1.09766	0.988876	0.881122	0.687542	0.660094	1.06055	-0.911026	-1.01125	-1.13492	-1.45446	-1.51493	-0.942904
5A	302113176	TuG1812G0500001717.01	TuG1812G0500001717.01.T03	AJ463251	95.429	350	12	3	1	347	1571	1919	2.92e-157	555	1.03411	0.769903	1.37213	2.14785	0.713057	NA	-0.967014	-1.29886	-0.728792	-0.465583	-1.40241	0
5A	302113176	TuG1812G0500001717.01	TuG1812G0500001717.01.T01	comp9281_c0_seq1	99.429	525	3	0	30	554	2205	1681	0	953	1.09567	1.01584	0.808836	0.601869	0.65395	1.15226	-0.912687	-0.984403	-1.23634	-1.66149	-1.52917	-0.867856
5A	302120012	TuG1812G0500001719.01	TuG1812G0500001719.01.T01	TC243736	94.8	500	26	0	1	500	1567	2066	0	785	1.01912	1.05296	0.347166	0.764138	0.3258	1.64584	-0.981235	-0.949708	-2.88046	-1.30866	-3.06937	-0.607592
5A	302120012	TuG1812G0500001719.01	TuG1812G0500001719.01.T01	TC376216	97.2	500	14	0	1	500	1583	2082	0	846	1.04868	0.866141	0.498033	0.796242	0.374696	2.13429	-0.953583	-1.15455	-2.0079	-1.2559	-2.66883	-0.468539
5A	302120012	TuG1812G0500001719.01	TuG1812G0500001719.01.T01	comp13309_c0_seq1	98.901	182	2	0	1	182	1956	2137	1.46e-88	326	1.27903	0.949547	0.461951	0.641787	0.382883	1.68215	-0.781841	-1.05313	-2.16473	-1.55815	-2.61177	-0.594478
5A	302120012	TuG1812G0500001719.01	TuG1812G0500001719.01.T01	comp24790_c0_seq1	98.893	271	3	0	1	271	1698	1968	2.42e-136	484	0.404652	0.692913	0.365902	0.572759	0.227918	1.43307	-2.47126	-1.44318	-2.73297	-1.74594	-4.38755	-0.697803
5A	302538737	TuG1812G0500001721.01	TuG1812G0500001721.01.T01	TC407381	94.578	498	26	1	3	500	1966	2462	0	769	NA	0	0.274427	0	NA	NA	NA	NA	-3.64396	NA	0	0
5A	302542011	TuG1812G0500001722.01	TuG1812G0500001722.01.T01	TC408998	99.793	484	1	0	1	484	582	1065	0	889	NA	0	2.46984	0.61367	0.792286	2.43622	0	NA	-0.404885	-1.62954	-1.26217	-0.410473
5A	302542011	TuG1812G0500001722.01	TuG1812G0500001722.01.T01	comp45318_c0_seq1	96.552	116	4	0	3	118	945	1060	6.68e-49	193	NA	1.15485	NA	NA	NA	NA	NA	-0.86591	0	0	0	NA
5A	302926483	TuG1812G0500001723.01	TuG1812G0500001723.01.T01	TC397455	83.832	334	54	0	1	334	1724	2057	5.02e-86	318	2.06822	5.19685	0.343033	0.61367	1.78264	0.522046	-0.483507	-0.192424	-2.91517	-1.62954	-0.560965	-1.91554
5A	302926483	TuG1812G0500001723.01	TuG1812G0500001723.01.T01	comp11836_c0_seq1	100	218	0	0	1	218	1976	2193	1.03e-111	403	1.44776	1.46981	0.626036	0.812699	1.20928	1.26322	-0.690724	-0.680358	-1.59735	-1.23047	-0.82694	-0.791626
5A	303365829	TuG1812G0500001724.01	TuG1812G0500001724.01.T02	TC248106	91.054	503	36	7	1	499	496	993	0	671	2.06822	0.577427	NA	1.07392	0.594214	1.21811	-0.483507	-1.73182	0	-0.931165	-1.68289	-0.820945
5A	303365829	TuG1812G0500001724.01	TuG1812G0500001724.01.T02	TC385630	99.4	500	3	0	1	500	466	965	0	907	1.8802	1.41149	0.47401	0.660876	0.631353	0.655904	-0.531858	-0.708472	-2.10966	-1.51314	-1.5839	-1.52461
5A	303365829	TuG1812G0500001724.01	TuG1812G0500001724.01.T02	TC391140	93.774	514	15	2	1	497	454	967	0	756	NA	NA	0.274427	NA	0	NA	0	NA	-3.64396	NA	NA	NA
5A	303365829	TuG1812G0500001724.01	TuG1812G0500001724.01.T02	TC391243	86.111	504	57	9	1	494	511	1011	5.92e-150	531	2.06822	NA	NA	NA	0	NA	-0.483507	NA	0	NA	NA	NA
5A	303365829	TuG1812G0500001724.01	TuG1812G0500001724.01.T02	comp9902_c0_seq1	98.724	392	5	0	1	392	702	1093	0	697	1.36146	1.36483	0.750904	0.636591	0.652401	1.20319	-0.734508	-0.732693	-1.33173	-1.57087	-1.5328	-0.831122
5A	303404154	TuG1812G0500001726.01	TuG1812G0500001726.01.T01	TC241823	86.193	507	33	11	1	496	1565	2045	5.96e-145	514	NA	1.15485	NA	NA	NA	0	NA	-0.86591	NA	NA	NA	NA
5A	303404154	TuG1812G0500001726.01	TuG1812G0500001726.01.T01	TC400734	93.426	502	17	4	1	500	1486	1973	0	730	0	0	NA	0	2.37686	NA	NA	NA	NA	NA	-0.420724	NA
5A	303404154	TuG1812G0500001726.01	TuG1812G0500001726.01.T01	comp23601_c0_seq1	98.113	212	4	0	1	212	1788	1999	5.7e-102	370	1.09874	0.747259	0.625083	0.894936	0.900325	1.17299	-0.910131	-1.33822	-1.59979	-1.1174	-1.11071	-0.85252
5A	303684425	TuG1812G0500001728.01	TuG1812G0500001728.01.T01	comp16000_c0_seq1	99.353	309	1	1	2	309	1484	1792	1.81e-158	558	0.556829	0.705744	1.45054	1.87937	1.90997	0.721842	-1.79588	-1.41694	-0.689398	-0.532095	-0.523567	-1.38534
5A	304039956	TuG1812G0500001730.01	TuG1812G0500001730.01.T01	TC397516	99.599	499	1	1	1	499	491	988	0	909	0.620467	0.577427	0.891886	0.390517	0.8319	1.21811	-1.61169	-1.73182	-1.12122	-2.5607	-1.20207	-0.820945
5A	304052413	TuG1812G0500001732.01	TuG1812G0500001732.01.T01	comp11132_c0_seq1	98.235	340	4	1	1	338	738	1077	5.11e-169	593	1.63944	2.0058	1.21071	0.665832	0.57545	0.788188	-0.609963	-0.498554	-0.825965	-1.50188	-1.73777	-1.26873
5A	304056800	TuG1812G0500001733.01	TuG1812G0500001733.01.T01	TC264785	95.541	471	18	3	24	494	846	1313	0	750	1.03411	1.53981	0.274427	0.859138	4.1595	2.43622	-0.967014	-0.649432	-3.64396	-1.16396	-0.240414	-0.410473
5A	304056800	TuG1812G0500001733.01	TuG1812G0500001733.01.T01	comp41126_c0_seq1	98.305	118	2	0	1	118	900	1017	2.27e-53	207	0	NA	NA	0	NA	0.609054	NA	NA	0	NA	NA	-1.64189
5A	304084706	TuG1812G0500001734.01	TuG1812G0500001734.01.T01	comp12496_c0_seq1	96.364	330	6	3	1	326	769	1096	2.51e-152	538	0.667169	1.5706	2.19541	0.536962	0.778626	1.46173	-1.49887	-0.636698	-0.455495	-1.86233	-1.28431	-0.684121
5A	304913791	TuG1812G0500001737.01	TuG1812G0500001737.01.T01	comp861_c0_seq1	98.636	660	9	0	600	1259	1956	1297	0	1170	0.686149	0.79114	1.31	1.20801	1.59944	0.827668	-1.45741	-1.264	-0.76336	-0.82781	-0.62522	-1.20821
5A	304918890	TuG1812G0500001739.01	TuG1812G0500001739.01.T01	TC254601	94.831	503	20	3	1	500	1604	2103	0	780	0	2.30971	NA	2.14785	0	NA	NA	-0.432955	0	-0.465583	NA	0
5A	304918890	TuG1812G0500001739.01	TuG1812G0500001739.01.T01	TC442084	98.673	226	3	0	1	226	2013	2238	4.84e-111	401	0.689408	1.25984	1.0634	0.52069	1.08509	0.903758	-1.45052	-0.793751	-0.940377	-1.92053	-0.921585	-1.10649
5A	304950711	TuG1812G0500001741.01	TuG1812G0500001741.01.T01	TC376042	98.6	500	6	1	1	500	1766	2264	0	883	0.614004	0.725909	3.84197	1.19325	1.6506	0.58137	-1.62865	-1.37758	-0.260283	-0.838049	-0.605842	-1.72008
5A	304950711	TuG1812G0500001741.01	TuG1812G0500001741.01.T01	comp3889_c0_seq1	96.486	313	9	2	16	328	2013	2323	1.46e-145	516	0.427908	0.43307	1.67847	0.543935	1.60212	0.762326	-2.33695	-2.30909	-0.595781	-1.83845	-0.624172	-1.31177
5A	306385861	TuG1812G0500001753.01	TuG1812G0500001753.01.T01	TC420518	97.4	500	11	2	1	500	753	1250	0	850	1.03411	0.577427	0.82328	NA	5.94214	0.487243	-0.967014	-1.73182	-1.21465	0	-0.168289	-2.05236
5A	306461314	TuG1812G0500001755.01	TuG1812G0500001755.01.T01	comp30427_c0_seq1	97.153	281	7	1	1	280	1168	1448	6.05e-133	473	2.58528	1.34733	1.04282	5.36962	0.457088	1.75949	-0.386806	-0.742209	-0.958937	-0.186233	-2.18776	-0.568347
5A	307738683	TuG1812G0500001758.01	TuG1812G0500001758.01.T01	CB863469	87.586	435	30	15	27	456	2056	2471	1.68e-135	483	NA	4.04199	NA	1.07392	3.56529	1.21811	0	-0.247403	0	-0.931165	-0.280482	-0.820945
5A	307738683	TuG1812G0500001758.01	TuG1812G0500001758.01.T01	TC390451	99.4	500	3	0	1	500	1994	2493	0	907	0.965171	0.692913	1.25017	0.734789	1.18843	0.931494	-1.03609	-1.44318	-0.799894	-1.36093	-0.841447	-1.07354
5A	307738683	TuG1812G0500001758.01	TuG1812G0500001758.01.T01	comp28074_c0_seq1	98.76	242	3	0	17	258	2415	2174	3.04e-120	431	1.18184	0.781568	1.15259	1.25468	1.11852	0.846966	-0.846137	-1.27948	-0.86761	-0.797014	-0.894038	-1.18069
5A	307738683	TuG1812G0500001758.01	TuG1812G0500001758.01.T01	comp28206_c0_seq1	98.095	105	2	0	1	105	2392	2496	3.82e-46	183	0	NA	0	NA	0	1.62414	NA	0	NA	NA	NA	-0.615709
5A	307740843	TuG1812G0500001759.01	TuG1812G0500001759.01.T01	TC430519	98.606	502	4	3	1	500	560	1060	0	885	0	0	NA	NA	NA	1.21811	NA	NA	0	NA	0	-0.820945
5A	307740843	TuG1812G0500001759.01	TuG1812G0500001759.01.T01	comp1817_c0_seq1	99.102	334	3	0	56	389	708	1041	3.54e-171	601	0.474847	0.488704	14.0415	2.17687	7.30198	0.853264	-2.10594	-2.04623	-0.0712175	-0.459375	-0.136949	-1.17197
5A	307810498	TuG1812G0500001760.01	TuG1812G0500001760.01.T01	TC256591	95.556	360	16	0	99	458	392	33	7.5e-164	577	1.03411	1.15485	NA	NA	NA	0	-0.967014	-0.86591	NA	0	NA	NA
5A	307810498	TuG1812G0500001760.01	TuG1812G0500001760.01.T01	TC374988	99.599	499	2	0	1	499	230	728	0	911	1.34783	1.18472	1.17394	0.896903	1.56656	1.4324	-0.741933	-0.84408	-0.851835	-1.11495	-0.638339	-0.698127
5A	307810498	TuG1812G0500001760.01	TuG1812G0500001760.01.T01	comp806_c0_seq1	96.943	229	4	1	1	226	722	494	2.68e-105	381	1.30776	1.21968	1.20988	1.23833	1.54584	1.71374	-0.764665	-0.819884	-0.826528	-0.807536	-0.646899	-0.583519
5A	307814844	TuG1812G0500001761.01	TuG1812G0500001761.01.T01	comp36401_c0_seq1	97.945	146	3	0	1	146	1087	1232	3.78e-67	254	0	0	NA	0	0.594214	0	NA	NA	NA	NA	-1.68289	NA
5A	308733492	TuG1812G0500001767.01	TuG1812G0500001767.01.T01	TC272505	86.92	474	21	19	1	472	1939	2373	7.77e-139	494	1.03411	1.73228	0.466525	0.715949	0.228544	6.09054	-0.967014	-0.577273	-2.14351	-1.39675	-4.37553	-0.164189
5A	308733492	TuG1812G0500001767.01	TuG1812G0500001767.01.T01	TC374304	93.825	502	13	4	4	500	1832	2320	0	739	1.63734	1.32469	0.661852	0.779121	0.404311	1.66475	-0.610746	-0.754896	-1.51091	-1.2835	-2.47335	-0.600692
5A	308733492	TuG1812G0500001767.01	TuG1812G0500001767.01.T01	TC416325	100	500	0	0	1	500	1868	2367	0	924	NA	NA	NA	0	1.18843	NA	0	NA	0	NA	-0.841447	NA
5A	308733492	TuG1812G0500001767.01	TuG1812G0500001767.01.T01	comp3674_c0_seq1	96.623	385	5	1	1	385	2057	2433	1.54e-180	632	1.7171	1.57909	0.729926	0.692625	0.407066	1.52537	-0.582379	-0.633277	-1.37	-1.44378	-2.4566	-0.65558
5A	308742682	TuG1812G0500001768.01	TuG1812G0500001768.01.T01	TC423738	99.202	501	3	1	1	500	2481	2981	0	902	1.80969	1.25109	1.0634	0.954598	0.843401	0.989713	-0.552579	-0.799301	-0.940377	-1.04756	-1.18568	-1.01039
5A	308742682	TuG1812G0500001768.01	TuG1812G0500001768.01.T01	comp40408_c0_seq1	100	119	0	0	1	119	2634	2752	2.95e-57	220	1.03411	NA	NA	0	NA	NA	-0.967014	NA	NA	NA	NA	NA
5A	309125052	TuG1812G0500001769.01	TuG1812G0500001769.01.T01	TC427517	99.6	500	2	0	1	500	211	710	0	913	3.79174	3.84951	4.25361	0.644354	0.735694	1.65315	-0.263731	-0.259773	-0.235094	-1.55194	-1.35926	-0.604907
5A	309125052	TuG1812G0500001769.01	TuG1812G0500001769.01.T01	comp32226_c0_seq1	100	104	0	0	1	104	621	724	7.09e-49	193	3.61939	1.15485	0.82328	4.29569	0.198071	1.82716	-0.27629	-0.86591	-1.21465	-0.232791	-5.04868	-0.547297
5A	309447630	TuG1812G0500001770.01	TuG1812G0500001770.01.T01	TC246257	99.219	128	1	0	1	128	214	341	6.72e-60	231	1.72352	1.15485	NA	0	2.37686	0.406036	-0.580208	-0.86591	0	NA	-0.420724	-2.46284
5A	309447630	TuG1812G0500001770.01	TuG1812G0500001770.01.T01	TC401568	100	148	0	0	1	148	194	341	1.1e-72	274	0.517056	NA	NA	0	NA	0	-1.93403	NA	0	NA	0	NA
5A	309482660	TuG1812G0500001772.01	TuG1812G0500001772.01.T01	TC242252	88.867	512	34	10	1	498	1009	1511	2.66e-173	608	0.517056	NA	NA	4.29569	NA	0.243622	-1.93403	NA	NA	-0.232791	NA	-4.10473
5A	309482660	TuG1812G0500001772.01	TuG1812G0500001772.01.T01	TC382106	93.117	523	13	2	1	500	963	1485	0	745	NA	NA	NA	0.715949	1.78264	0	0	0	0	-1.39675	-0.560965	NA
5A	309482660	TuG1812G0500001772.01	TuG1812G0500001772.01.T01	TC387147	97.172	495	10	4	1	494	910	1401	0	833	1.03411	5.77427	2.19541	2.14785	NA	0.812072	-0.967014	-0.173182	-0.455495	-0.465583	0	-1.23142
5A	309482660	TuG1812G0500001772.01	TuG1812G0500001772.01.T01	comp2021_c0_seq1	96.309	596	18	1	1	596	926	1517	0	976	0.811553	0.929567	0.815256	0.939683	1.52081	1.01004	-1.23221	-1.07577	-1.22661	-1.06419	-0.657546	-0.99006
5A	309517017	TuG1812G0500001773.01	TuG1812G0500001773.01.T02	TC415145	94.274	489	23	2	1	489	654	1137	0	743	NA	NA	NA	4.29569	NA	6.09054	0	0	0	-0.232791	0	-0.164189
5A	309523715	TuG1812G0500001774.01	TuG1812G0500001774.01.T01	comp24406_c0_seq1	98	300	5	1	1	299	890	1189	7.39e-147	520	1.4219	0.734907	8.2328	NA	5.34793	0.913581	-0.703283	-1.36072	-0.121465	0	-0.186988	-1.09459
5A	310508319	TuG1812G0500001780.01	TuG1812G0500001780.01.T02	TC256777	93.439	503	22	6	1	499	974	1469	0	736	1.56942	1.53004	1.00129	0.774302	0.689713	0.933019	-0.63718	-0.65358	-0.998715	-1.29149	-1.44988	-1.07179
5A	310508319	TuG1812G0500001780.01	TuG1812G0500001780.01.T02	TC388766	99.399	499	3	0	1	499	985	1483	0	905	5.17056	0.769903	0.548853	NA	0.594214	NA	-0.193403	-1.29886	-1.82198	0	-1.68289	0
5A	310508319	TuG1812G0500001780.01	TuG1812G0500001780.01.T02	comp1057_c0_seq1	95.812	382	9	4	1	378	1075	1453	5.77e-174	610	1.1533	0.964659	0.715928	0.573544	0.555145	0.833263	-0.867075	-1.03664	-1.39679	-1.74355	-1.80133	-1.2001
5A	311908730	TuG1812G0500001784.01	TuG1812G0500001784.01.T02	TC443422	99.213	254	1	1	1	254	3	255	7.04e-128	457	NA	NA	0.274427	0	NA	NA	NA	NA	-3.64396	NA	NA	NA
5A	311908730	TuG1812G0500001784.01	TuG1812G0500001784.01.T01	comp26706_c0_seq1	99.556	225	1	0	285	509	1076	852	8.2e-114	411	0.689408	1.15485	1.64656	0.357974	0.540195	2.63923	-1.45052	-0.86591	-0.607327	-2.7935	-1.85118	-0.378898
5A	312059561	TuG1812G0500001785.01	TuG1812G0500001785.01.T01	TC423905	99.6	500	1	1	1	500	1538	2036	0	911	0.910018	1.02654	1.64656	1.02723	0.633828	0.996634	-1.09888	-0.974149	-0.607327	-0.973491	-1.57771	-1.00338
5A	312559998	TuG1812G0500001786.01	TuG1812G0500001786.01.T01	comp17778_c0_seq1	97.842	139	3	0	1	139	559	697	4.05e-63	241	0.574506	0.649606	1.09771	0	4.75371	0.812072	-1.74063	-1.5394	-0.91099	NA	-0.210362	-1.23142
5A	312646651	TuG1812G0500001787.01	TuG1812G0500001787.01.T01	TC263697	90.316	506	40	3	1	498	691	1195	0	654	2.58528	3.46456	NA	0.536962	0.594214	0.913581	-0.386806	-0.288637	0	-1.86233	-1.68289	-1.09459
5A	312646651	TuG1812G0500001787.01	TuG1812G0500001787.01.T01	comp1978_c0_seq1	96.524	489	9	2	1	481	805	1293	0	802	1.99928	1.90755	0.573122	0.89819	0.799959	1.74908	-0.50018	-0.524233	-1.74483	-1.11335	-1.25006	-0.57173
5A	312649315	TuG1812G0500001788.01	TuG1812G0500001788.01.T01	CV768321	89.614	414	20	23	1	412	345	737	3.59e-142	505	0	NA	NA	NA	NA	0.406036	NA	NA	0	0	NA	-2.46284
5A	312649315	TuG1812G0500001788.01	TuG1812G0500001788.01.T01	TC238805	94.303	509	13	8	1	500	412	913	0	765	0.861759	1.29921	0.686067	0.339134	0.990357	0.487243	-1.16042	-0.769698	-1.45758	-2.94869	-1.00974	-2.05236
5A	312649315	TuG1812G0500001788.01	TuG1812G0500001788.01.T01	TC374197	97.8	500	5	3	1	500	463	956	0	857	NA	0	NA	NA	0	0.609054	NA	NA	NA	NA	NA	-1.64189
5A	312649315	TuG1812G0500001788.01	TuG1812G0500001788.01.T01	TC422241	99.8	500	1	0	1	500	507	1006	0	918	1.20646	0.659917	0.82328	0.536962	0	1.21811	-0.828869	-1.51534	-1.21465	-1.86233	NA	-0.820945
5A	312649315	TuG1812G0500001788.01	TuG1812G0500001788.01.T01	comp19504_c0_seq1	96.591	264	3	1	19	282	1000	743	9.29e-121	433	0.950264	0.859427	1.16992	0.590068	0.926571	0.937006	-1.05234	-1.16357	-0.854756	-1.69472	-1.07925	-1.06723
5A	313545428	TuG1812G0500001789.01	TuG1812G0500001789.01.T01	comp7105_c0_seq1	99.461	371	2	0	50	420	976	606	0	675	1.6846	1.20105	1.55803	1.55122	1.17877	1.22675	-0.593612	-0.832606	-0.641834	-0.644653	-0.848345	-0.815164
5A	313805423	TuG1812G0500001790.01	TuG1812G0500001790.01.T01	TC413293	97.446	509	4	1	1	500	1807	2315	0	859	0.477282	0.505249	1.16631	1.15653	1.18843	1.11219	-2.0952	-1.97922	-0.857403	-0.864654	-0.841447	-0.89913
5A	314083846	TuG1812G0500001791.01	TuG1812G0500001791.01.T01	CV769873	98.008	251	5	0	1	251	643	893	1.33e-121	436	0	NA	NA	NA	0	0.609054	NA	NA	NA	NA	NA	-1.64189
5A	314083846	TuG1812G0500001791.01	TuG1812G0500001791.01.T01	TC259828	90.635	299	5	1	1	276	595	893	2.94e-103	375	1.23988	1.39717	0.875552	0.998488	0.628616	1.15133	-0.806531	-0.715734	-1.14214	-1.00151	-1.5908	-0.868557
5A	314083846	TuG1812G0500001791.01	TuG1812G0500001791.01.T02	comp2662_c0_seq1	98.492	199	3	0	96	294	1001	803	2.8e-96	351	1.39648	1.35746	0.927607	0.820373	0.70122	1.16222	-0.716087	-0.73667	-1.07804	-1.21896	-1.42609	-0.860421
5A	314083846	TuG1812G0500001791.01	TuG1812G0500001791.01.T01	comp850_c0_seq1	95.455	198	9	0	1	198	840	643	7.41e-86	316	1.007	1.50314	0.945579	1.15484	0.682627	1.26322	-0.993049	-0.665272	-1.05755	-0.865925	-1.46493	-0.791626
5A	314089631	TuG1812G0500001792.01	TuG1812G0500001792.01.T01	TC257337	96.982	497	11	4	1	497	572	1064	0	833	NA	0	NA	4.29569	2.37686	NA	0	NA	0	-0.232791	-0.420724	0
5A	314089631	TuG1812G0500001792.01	TuG1812G0500001792.01.T01	TC257934	94.886	352	14	3	1	348	1087	1438	5.88e-155	547	1.03411	0.577427	0.548853	2.14785	2.37686	0	-0.967014	-1.73182	-1.82198	-0.465583	-0.420724	NA
[truncated: 3,908 more rows]
