# Supplementary material for: Mapping of prehaustorial resistance against wheat leaf rust in einkorn (Triticum monococcum), a progenitor of wheat
Source: Front Plant Sci. 2023 Oct 23;14:1252123. doi: 10.3389/fpls.2023.1252123 (PMC10626456; doi:10.3389/fpls.2023.1252123)
Supplement: Supplementary file 7 [file Table_7.xlsx]

## Sheet: Table_S7
Table S7: Relative expression values of all MACE.
This table includes the relative expression values that were calculated for the respective MACE- tags in inoculated and not inoculated samples 8,16 and 24 hours after incetion (hai), respectively.
Abbreviations and more detailed information are explored at the bottom of the table.
	MACE-Annotatioin ( according to GeneXPro (https://genxpro.net)	TOTAL tags per million (TPM)						TOTAL tags per million (TPM)						Relative expression value (REV) 1						Relative expression value (REV) 2
MACE_id		8h TB nin	8h TB in	24h TB nin	24h TB in	16h TB nin	16h TB in	8h PI nin	8h PI in	24h PI nin	24h PI in	16h PI nin	16h PI in	REV1-8hai_nin	REV1-8hai_in	REV1-24hai_nin	REV1-24hai_in	REV1-16hai_nin	REV1-16hai_in	REV2-8hai_nin	REV2-8hai_in	REV2-24hai_nin	REV2-24hai_in	REV2-16hai_nin	REV2-16hai_in
comp9187_c1_seq1	comp9187_c1_seq1 len=166 path=[255:0-165]	3.3898e-06	2.62125e-06	3.97096e-06	4.99178e-06	4.50779e-06	3.73479e-06	5.13587e-06	4.71674e-06	4.72219e-06	5.42102e-06	3.86531e-06	5.75363e-06	1.51509	1.79942	1.18918	1.08599	0.857474	1.54055	-0.660025	-0.555733	-0.840914	-0.920819	-1.16622	-0.649119
comp568_c0_seq1	comp568_c0_seq1 len=397 path=[0:0-396]	0.000100512	0.000127954	5.0677e-05	4.88521e-05	6.33943e-05	8.85915e-05	9.66033e-05	9.92628e-05	5.09063e-05	3.79471e-05	9.9413e-05	8.27586e-05	0.961115	0.775772	1.00452	0.776776	1.56817	0.93416	-1.04046	-1.28904	-0.995496	-1.28737	-0.637686	-1.07048
comp8566_c0_seq1	comp8566_c0_seq1 len=518 path=[0:0-517] : tr|F5CPS4|F5CPS4_WHEAT Putative uncharacterized protein OS=Triticum aestivum GN=TAANSRALLha_1144N5.t00004 PE=4 SV=1 e-value: 4e-07 blast score: 55.1	6.54311e-06	5.2425e-06	1.19129e-05	1.31805e-05	1.72323e-05	7.63435e-06	6.84783e-06	7.67351e-06	7.78383e-06	1.04806e-05	8.74781e-06	1.21094e-05	1.04657	1.46371	0.653397	0.79516	0.50764	1.58617	-0.955502	-0.683195	-1.53046	-1.25761	-1.9699	-0.63045
comp612_c0_seq1	comp612_c0_seq1 len=408 path=[0:0-407]	4.02047e-05	4.76092e-05	4.12223e-05	4.65525e-05	4.96427e-05	3.93801e-05	3.88043e-05	4.25211e-05	5.36566e-05	4.28863e-05	4.02128e-05	3.48563e-05	0.965171	0.893127	1.30164	0.921245	0.810044	0.885125	-1.03609	-1.11966	-0.768263	-1.08549	-1.2345	-1.12978
comp45940_c0_seq1	comp45940_c0_seq1 len=207 path=[0:0-206]	3.15331e-07	0	0	5.60874e-08	5.70606e-08	5.49234e-08	8.15217e-08	7.03992e-08	4.6703e-07	1.20467e-07	6.78124e-08	3.34513e-07	0.258528	0	0	2.14785	1.18843	6.09054	-3.86806	0	0	-0.465583	-0.841447	-0.164189
TC370863	TC370863 similar to UniRef100_Q0DRL1 Cluster: Os03g0374500 protein; n=3; Oryza sativa|Rep: Os03g0374500 protein - Oryza sativa subsp. japonica (Rice), partial (17%) #or# TC399872 similar to UniRef100_Q0DRL1 Cluster: Os03g0374500 protein; n=3; Oryza sativa|Rep: Os03g0374500 protein - Oryza sativa subsp. japonica (Rice), partial (17%)	1.34016e-06	1.9507e-06	2.08003e-06	2.80437e-06	1.82594e-06	1.6477e-06	2.36413e-06	3.59036e-06	2.85407e-06	1.92747e-06	2.44125e-06	3.21133e-06	1.76407	1.84055	1.37213	0.687311	1.33698	1.94897	-0.56687	-0.543316	-0.728792	-1.45495	-0.747953	-0.513091
comp18062_c0_seq1	comp18062_c0_seq1 len=257 path=[0:0-256]	5.51829e-07	7.31512e-07	3.78187e-07	2.80437e-07	5.70606e-07	3.2954e-07	5.70652e-07	1.40798e-07	4.6703e-07	4.81868e-07	5.425e-07	2.67611e-07	1.03411	0.192476	1.23492	1.71828	0.950743	0.812072	-0.967014	-5.19546	-0.809769	-0.581978	-1.05181	-1.23142
comp11006_c0_seq1	comp11006_c0_seq1 len=384 path=[0:0-383]	2.95622e-05	2.88338e-05	5.14334e-05	5.99013e-05	6.24814e-05	4.55864e-05	2.85326e-05	2.87933e-05	4.72738e-05	5.44511e-05	4.10943e-05	4.6698e-05	0.965171	0.998595	0.919127	0.909014	0.657706	1.02438	-1.03609	-1.00141	-1.08799	-1.10009	-1.52044	-0.976196
comp8353_c0_seq1	comp8353_c0_seq1 len=444 path=[0:0-160 161:161-175 637:176-283 284:284-443] : tr|F2DND3|F2DND3_HORVD Predicted protein OS=Hordeum vulgare var. distichum PE=2 SV=1 e-value: 6e-04 blast score: 43.9	3.78397e-06	5.05962e-06	8.3201e-06	7.74006e-06	6.04842e-06	6.04157e-06	5.38044e-06	5.13914e-06	5.29301e-06	6.38476e-06	6.71343e-06	6.35575e-06	1.4219	1.01572	0.636171	0.824897	1.10995	1.052	-0.703283	-0.984528	-1.57191	-1.21227	-0.900944	-0.950568
comp2134_c0_seq1	comp2134_c0_seq1 len=401 path=[0:0-400] : tr|B8B8M0|B8B8M0_ORYSI Putative uncharacterized protein OS=Oryza sativa subsp. indica GN=OsI_26899 PE=4 SV=1 e-value: 4e-11 blast score: 67.8	2.38863e-05	1.93241e-05	3.38477e-05	3.7859e-05	3.41793e-05	2.69125e-05	3.06522e-05	2.76669e-05	2.91634e-05	3.45741e-05	2.21069e-05	3.03069e-05	1.28325	1.43173	0.861608	0.913232	0.646791	1.12613	-0.779269	-0.698457	-1.16062	-1.09501	-1.5461	-0.887998
comp2619_c0_seq1	comp2619_c0_seq1 len=538 path=[2:0-537] : tr|F2DN04|F2DN04_HORVD Predicted protein OS=Hordeum vulgare var. distichum PE=2 SV=1 e-value: 5e-14 blast score: 78.2	1.71067e-05	1.8044e-05	2.04221e-05	2.76511e-05	1.98571e-05	2.51549e-05	2.70652e-05	2.21757e-05	2.13277e-05	1.87929e-05	2.21747e-05	2.19441e-05	1.58214	1.22898	1.04435	0.679643	1.11671	0.872357	-0.632054	-0.81368	-0.957537	-1.47136	-0.895485	-1.14632
TC419409	TC419409 similar to UniRef100_P23345 Cluster: Superoxide dismutase [Cu-Zn] 4A; n=2; Zea mays|Rep: Superoxide dismutase [Cu-Zn] 4A - Zea mays (Maize), partial (89%)	1.97082e-06	2.07262e-06	2.08003e-06	3.70177e-06	1.65476e-06	2.03217e-06	2.85326e-06	1.90078e-06	2.43893e-06	2.04794e-06	1.35625e-06	1.73947e-06	1.44776	0.91709	1.17255	0.553233	0.819606	0.855968	-0.690724	-1.09041	-0.852842	-1.80756	-1.2201	-1.16827
TC369727	TC369727 homologue to UniRef100_Q6H3Y3 Cluster: Chaperone protein dnaJ-like; n=2; Oryza sativa|Rep: Chaperone protein dnaJ-like - Oryza sativa subsp. japonica (Rice), partial (66%)	1.57665e-06	1.58494e-06	1.73966e-05	2.29958e-06	2.56773e-06	1.81247e-06	5.71467e-05	6.35e-05	6.86534e-05	8.17972e-05	6.01496e-05	7.6938e-05	36.2456	40.0646	3.94637	35.5704	23.4252	42.4492	-0.0275896	-0.0249597	-0.253397	-0.0281132	-0.042689	-0.0235576
comp198_c0_seq1	comp198_c0_seq1 len=722 path=[0:0-245 246:246-269 270:270-721]	0.000221441	0.000246946	0.000110241	0.00012687	0.000147216	0.000210741	0.000168668	0.000171704	0.000167768	0.000135766	0.000199369	0.00017776	0.761686	0.695307	1.52182	1.07012	1.35426	0.843501	-1.31288	-1.43821	-0.657108	-0.93447	-0.738413	-1.18554
CJ967264	CJ967264 homologue to UniRef100_A1E9Y8 Cluster: Photosystem Q(B) protein; n=23; Pooideae|Rep: Photosystem Q(B) protein - Agrostis stolonifera (Creeping bentgrass), partial (28%)	5.51829e-07	1.82878e-07	1.51275e-06	1.23392e-06	4.56485e-07	9.88621e-07	1.38587e-06	1.05599e-06	1.08974e-06	6.02335e-07	3.39062e-07	1.20425e-06	2.51141	5.77427	0.72037	0.488147	0.742768	1.21811	-0.398182	-0.173182	-1.38818	-2.04856	-1.34632	-0.820945
comp24359_c0_seq1	comp24359_c0_seq1 len=231 path=[15:0-230] : tr|F2EIF6|F2EIF6_HORVD Predicted protein OS=Hordeum vulgare var. distichum PE=2 SV=1 e-value: 5e-14 blast score: 77.4	3.15331e-07	4.26715e-07	3.78187e-07	1.06566e-06	4.56485e-07	3.2954e-07	6.52174e-07	7.03992e-07	7.78383e-07	4.81868e-07	3.39062e-07	8.02832e-07	2.06822	1.64979	2.0582	0.452178	0.742768	2.43622	-0.483507	-0.606137	-0.485862	-2.21152	-1.34632	-0.410473
comp23988_c0_seq1	comp23988_c0_seq1 len=318 path=[0:0-317] : tr|F2DM02|F2DM02_HORVD Predicted protein OS=Hordeum vulgare var. distichum PE=2 SV=1 e-value: 2e-14 blast score: 79.0	8.82926e-06	1.03631e-05	9.26557e-06	1.40779e-05	1.04992e-05	9.3919e-06	9.86413e-06	8.87029e-06	1.00152e-05	1.12034e-05	7.93406e-06	1.14404e-05	1.11721	0.855951	1.0809	0.795815	0.755685	1.21811	-0.895087	-1.16829	-0.925151	-1.25657	-1.3233	-0.820945
comp22033_c0_seq1	comp22033_c0_seq1 len=104 path=[0:0-103]	2.36498e-07	0	1.89093e-07	3.36524e-07	1.71182e-07	2.74617e-07	0	0	1.03784e-07	1.20467e-07	2.03437e-07	1.33805e-07	0	0	0.548853	0.357974	1.18843	0.487243	0	0	-1.82198	-2.7935	-0.841447	-2.05236
comp11667_c0_seq1	comp11667_c0_seq1 len=494 path=[0:0-493] : tr|F2CZ74|F2CZ74_HORVD Predicted protein (Fragment) OS=Hordeum vulgare var. distichum PE=2 SV=1 e-value: 3e-08 blast score: 58.5	3.15331e-06	2.62125e-06	1.19129e-05	1.21149e-05	1.19257e-05	3.57002e-06	1.46739e-06	4.22395e-07	7.26491e-07	2.28887e-06	6.10312e-07	1.33805e-06	0.46535	0.161142	0.0609837	0.188931	0.0511763	0.374803	-2.14892	-6.20569	-16.3978	-5.29294	-19.5403	-2.66807
comp5056_c0_seq1	comp5056_c0_seq1 len=776 path=[0:0-775] : tr|F2D0J0|F2D0J0_HORVD Predicted protein OS=Hordeum vulgare var. distichum PE=2 SV=1 e-value: 5e-21 blast score: 102	1.75797e-05	1.81659e-05	1.68293e-05	2.10328e-05	2.1626e-05	1.90035e-05	1.79348e-05	2.12605e-05	2.26769e-05	1.78291e-05	2.12931e-05	1.90004e-05	1.0202	1.17036	1.34747	0.847683	0.984608	0.999834	-0.9802	-0.854441	-0.742134	-1.17969	-1.01563	-1.00017
comp19693_c0_seq1	comp19693_c0_seq1 len=284 path=[0:0-283]	1.41899e-06	3.04797e-07	1.32365e-06	4.48699e-07	7.41788e-07	1.20831e-06	1.54891e-06	1.97118e-06	2.85407e-06	2.77074e-06	3.66187e-06	2.27469e-06	1.09156	6.46719	2.15621	6.17506	4.93655	1.88253	-0.916118	-0.154627	-0.463777	-0.161942	-0.202571	-0.5312
comp15471_c0_seq1	comp15471_c0_seq1 len=343 path=[0:0-342]	6.70078e-06	4.99866e-06	7.94192e-06	7.62789e-06	6.90433e-06	5.71203e-06	7.66304e-06	5.35034e-06	5.91571e-06	4.93915e-06	5.56062e-06	5.28531e-06	1.14361	1.07035	0.744872	0.647512	0.805381	0.925294	-0.874427	-0.934271	-1.34251	-1.54437	-1.24165	-1.08074
comp45598_c0_seq1	comp45598_c0_seq1 len=162 path=[0:0-161] : tr|Q8S6H5|Q8S6H5_ORYSJ Putative uncharacterized protein OSJNBb0075K12.11 OS=Oryza sativa subsp. japonica GN=OSJNBb0075K12.11 PE=4 SV=1 e-value: 8e-11 blast score: 66.6	7.88327e-08	1.82878e-07	0	0	0	1.09847e-07	0	2.81597e-07	3.11353e-07	0	0	0	0	1.53981	0	0	0	0	0	-0.649432	0	0	0	0
comp43534_c0_seq1	comp43534_c0_seq1 len=286 path=[0:0-285]	1.57665e-07	1.21919e-07	0	0	0	0	1.63043e-07	0	0	0	0	0	1.03411	0	0	0	0	0	-0.967014	0	0	0	0	0
comp22943_c0_seq1	comp22943_c0_seq1 len=260 path=[0:0-259]	7.09494e-07	3.65756e-07	0	0	0	0	1.63043e-07	2.11197e-07	0	0	0	6.69027e-08	0.229803	0.577427	0	0	0	0	-4.35156	-1.73182	0	0	0	0
comp42444_c0_seq1	comp42444_c0_seq1 len=141 path=[0:0-140] : tr|A9L9V1|A9L9V1_DIAOB ATP synthase subunit beta (Fragment) OS=Diarrhena obovata GN=atpB PE=3 SV=1 e-value: 3e-16 blast score: 84.7	4.72996e-07	1.03631e-06	3.78187e-07	7.85224e-07	3.42364e-07	1.04354e-06	8.15217e-07	4.92794e-07	9.85952e-07	2.40934e-07	2.7125e-07	2.67611e-07	1.72352	0.475528	2.60705	0.306835	0.792286	0.256444	-0.580208	-2.10292	-0.383575	-3.25908	-1.26217	-3.89949
comp22400_c0_seq1	comp22400_c0_seq1 len=498 path=[0:0-497]	9.45992e-07	5.48634e-07	2.08003e-06	1.06566e-06	6.84727e-07	7.68928e-07	1.46739e-06	9.85588e-07	8.82168e-07	9.63737e-07	9.49374e-07	1.40496e-06	1.55117	1.79644	0.424114	0.904356	1.3865	1.82716	-0.644676	-0.556656	-2.35786	-1.10576	-0.721241	-0.547297
comp8699_c0_seq1	comp8699_c0_seq1 len=440 path=[0:0-439] : tr|G7IT85|G7IT85_MEDTR Phosphoglycerate kinase OS=Medicago truncatula GN=MTR_2g066110 PE=4 SV=1 e-value: 2e-26 blast score: 118	4.96646e-06	3.16989e-06	0	0	0	0	4.07609e-06	5.27994e-06	1.03784e-07	0	6.78124e-08	0	0.820723	1.66566	0	0	0	0	-1.21844	-0.600364	0	0	0	0
comp2296_c0_seq1	comp2296_c0_seq1 len=374 path=[0:0-373]	6.88209e-05	7.36998e-05	8.77393e-05	0.000107407	8.85581e-05	7.58492e-05	6.45652e-05	6.4908e-05	6.05063e-05	5.4933e-05	5.70981e-05	5.82053e-05	0.938163	0.880708	0.689615	0.511445	0.644753	0.767382	-1.06591	-1.13545	-1.45008	-1.95524	-1.55098	-1.30313
TC369003	TC369003 similar to UniRef100_A7PVY4 Cluster: Chromosome chr8 scaffold_34, whole genome shotgun sequence; n=1; Vitis vinifera|Rep: Chromosome chr8 scaffold_34, whole genome shotgun sequence - Vitis vinifera (Grape), partial (44%) #or# TC382699	2.36498e-07	1.82878e-07	0	5.60874e-08	1.71182e-07	2.19694e-07	2.44565e-07	0	2.59461e-07	0	2.03437e-07	6.69027e-08	1.03411	0	0	0	1.18843	0.304527	-0.967014	0	0	0	-0.841447	-3.28378
TC40482	TC40482 similar to UniRef100_A7QKL8 Cluster: Chromosome chr2 scaffold_113, whole genome shotgun sequence; n=1; Vitis vinifera|Rep: Chromosome chr2 scaffold_113, whole genome shotgun sequence - Vitis vinifera (Grape), partial (78%)	0	1.21919e-07	0	0	0	0	1.63043e-07	7.03992e-08	0	0	0	0	0	0.577427	0	0	0	0	0	-1.73182	0	0	0	0
comp9271_c0_seq1	comp9271_c0_seq1 len=560 path=[0:0-559]	3.78397e-06	3.84044e-06	6.05098e-06	4.54308e-06	5.53488e-06	4.17418e-06	4.23913e-06	5.13914e-06	6.33085e-06	5.05962e-06	4.61125e-06	5.75363e-06	1.12029	1.33816	1.04625	1.1137	0.833125	1.37839	-0.892628	-0.747292	-0.955793	-0.897909	-1.2003	-0.725486
comp5507_c0_seq1	comp5507_c0_seq1 len=362 path=[0:0-361] : tr|Q9ATF6|Q9ATF6_CASSA Ribosomal protein L17 OS=Castanea sativa PE=2 SV=1 e-value: 8e-24 blast score: 109	5.47887e-05	5.51682e-05	4.2546e-05	6.85949e-05	5.40364e-05	7.71674e-05	6.49728e-05	5.42777e-05	4.67549e-05	4.57775e-05	5.03846e-05	6.43603e-05	1.18588	0.983859	1.09893	0.66736	0.932421	0.834036	-0.843256	-1.01641	-0.909979	-1.49844	-1.07248	-1.19899
TC249635	TC249635 similar to UniRef100_Q0IYQ0 Cluster: Os10g0181200 protein; n=1; Oryza sativa Japonica Group|Rep: Os10g0181200 protein - Oryza sativa subsp. japonica (Rice), partial (52%)	1.24556e-05	1.41426e-05	1.22911e-05	1.14418e-05	1.38657e-05	1.19733e-05	1.71196e-05	1.78814e-05	9.65195e-06	9.8783e-06	1.58681e-05	1.35143e-05	1.37445	1.26437	0.785282	0.86335	1.14441	1.12871	-0.727563	-0.79091	-1.27343	-1.15828	-0.873811	-0.885971
comp1118_c0_seq1	comp1118_c0_seq1 len=410 path=[0:0-409]	3.6263e-05	3.63318e-05	9.01975e-05	5.97892e-05	6.00848e-05	3.2954e-05	8.33967e-05	7.9903e-05	2.68283e-05	3.81881e-05	2.35309e-05	1.87996e-05	2.29977	2.19926	0.297439	0.638712	0.391628	0.570481	-0.434825	-0.454698	-3.36203	-1.56565	-2.55344	-1.75291
comp9125_c0_seq1	comp9125_c0_seq1 len=219 path=[0:0-90 91:91-218] #or# comp9125_c0_seq2 len=187 path=[196:0-58 91:59-186]	8.67159e-07	9.75349e-07	1.89093e-07	8.97398e-07	9.7003e-07	1.26324e-06	1.46739e-06	9.85588e-07	7.78383e-07	1.44561e-06	6.10312e-07	1.07044e-06	1.69218	1.0105	4.1164	1.61088	0.629168	0.84738	-0.590953	-0.989611	-0.242931	-0.620777	-1.5894	-1.18011
comp1872_c0_seq1	comp1872_c0_seq1 len=153 path=[0:0-152]	6.07011e-06	6.33977e-06	1.36147e-05	1.78919e-05	1.63764e-05	6.97527e-06	2.28261e-06	2.11197e-07	4.15138e-07	3.61401e-07	5.425e-07	3.34513e-07	0.37604	0.0333131	0.0304918	0.0201992	0.0331269	0.047957	-2.65929	-30.0182	-32.7957	-49.507	-30.1869	-20.852
TC379724	TC379724 UniRef100_Q5I7K5 Cluster: Ribosomal protein P1; n=1; Triticum aestivum|Rep: Ribosomal protein P1 - Triticum aestivum (Wheat), complete	1.34016e-06	1.09727e-06	1.32365e-06	9.53486e-07	2.56773e-06	2.52648e-06	1.38587e-06	8.4479e-07	6.74599e-07	2.40934e-07	4.06875e-07	1.07044e-06	1.03411	0.769903	0.509649	0.252688	0.158457	0.42369	-0.967014	-1.29886	-1.96213	-3.95745	-6.31086	-2.36022
TC425906	TC425906	5.51829e-07	2.43837e-07	1.89093e-07	3.92612e-07	3.42364e-07	4.94311e-07	4.07609e-07	6.33592e-07	8.82168e-07	7.22803e-07	7.45937e-07	8.69734e-07	0.738651	2.59842	4.66525	1.84101	2.17879	1.75949	-1.35382	-0.384849	-0.214351	-0.54318	-0.458971	-0.568347
comp8676_c0_seq1	comp8676_c0_seq1 len=349 path=[0:0-348] : tr|Q3T8Y9|Q3T8Y9_WHEAT Autophagy protein 9 OS=Triticum aestivum GN=atg9 PE=2 SV=1 e-value: 1e-04 blast score: 46.2	4.41463e-06	4.02332e-06	6.05098e-06	7.62789e-06	6.50491e-06	5.38249e-06	5.95109e-06	6.61752e-06	7.05734e-06	6.98709e-06	6.44218e-06	7.15858e-06	1.34804	1.64479	1.16631	0.915993	0.990357	1.32998	-0.741819	-0.607979	-0.857403	-1.09171	-1.00974	-0.751894
TC238539	TC238539 UniRef100_O65189 Cluster: Glucan endo-1,3-beta-glucosidase isoenzyme I; n=1; Hordeum vulgare|Rep: Glucan endo-1,3-beta-glucosidase isoenzyme I - Hordeum vulgare (Barley), complete #or# TC254114 UniRef100_O65189 Cluster: Glucan endo-1,3-beta-glucosidase isoenzyme I; n=1; Hordeum vulgare|Rep: Glucan endo-1,3-beta-glucosidase isoenzyme I - Hordeum vulgare (Barley), partial (52%)	5.51829e-07	4.26715e-07	1.89093e-07	2.80437e-07	1.14121e-07	5.49234e-07	5.70652e-07	4.22395e-07	5.18922e-07	0	4.74687e-07	2.67611e-07	1.03411	0.989875	2.74427	0	4.1595	0.487243	-0.967014	-1.01023	-0.364396	0	-0.240414	-2.05236
comp104_c0_seq1	comp104_c0_seq1 len=551 path=[0:0-550] : tr|F2ECN7|F2ECN7_HORVD Predicted protein OS=Hordeum vulgare var. distichum PE=4 SV=1 e-value: 6e-23 blast score: 107	0.0003147	0.000251823	0.000967023	0.000710515	0.00084113	0.000289996	0.000986739	0.000776432	0.00028904	0.000594867	0.000208862	0.000729774	3.13549	3.08325	0.298896	0.837233	0.248311	2.5165	-0.318929	-0.324333	-3.34564	-1.19441	-4.0272	-0.397377
TC436573	TC436573 weakly similar to UniRef100_Q0DA19 Cluster: Os06g0683600 protein; n=1; Oryza sativa Japonica Group|Rep: Os06g0683600 protein - Oryza sativa subsp. japonica (Rice), partial (14%)	3.94163e-07	5.48634e-07	5.6728e-07	1.3461e-06	6.27667e-07	6.04157e-07	1.22283e-06	1.40798e-06	7.26491e-07	6.02335e-07	1.35625e-07	8.02832e-07	3.10233	2.56634	1.28066	0.447468	0.216078	1.32885	-0.322338	-0.389659	-0.780849	-2.2348	-4.62796	-0.752533
comp7661_c0_seq1	comp7661_c0_seq1 len=342 path=[0:0-341] : tr|C5Y8S1|C5Y8S1_SORBI Putative uncharacterized protein Sb06g017270 OS=Sorghum bicolor GN=Sb06g017270 PE=3 SV=1 e-value: 6e-11 blast score: 67.0	4.3358e-06	4.14523e-06	2.08003e-06	2.63611e-06	1.94006e-06	4.06433e-06	4.23913e-06	4.15355e-06	2.90596e-06	2.77074e-06	4.13656e-06	5.0177e-06	0.977705	1.00201	1.39708	1.05107	2.13218	1.23457	-1.0228	-0.997998	-0.715778	-0.951408	-0.469003	-0.809999
comp6245_c0_seq1	comp6245_c0_seq1 len=496 path=[0:0-495]	6.22778e-06	7.92471e-06	4.72733e-06	5.72091e-06	4.90721e-06	1.0051e-05	4.97283e-06	6.75832e-06	1.0586e-05	6.86662e-06	1.03753e-05	7.82761e-06	0.798491	0.852816	2.23932	1.20027	2.1143	0.77879	-1.25236	-1.17259	-0.446564	-0.833148	-0.47297	-1.28404
CD895831	CD895831 weakly similar to UniRef100_Q0JKQ8 Cluster: Os01g0656600 protein; n=2; Oryza sativa Japonica Group|Rep: Os01g0656600 protein - Oryza sativa subsp. japonica (Rice), partial (23%)	4.72996e-07	5.48634e-07	1.89093e-07	5.04787e-07	5.13545e-07	6.59081e-07	5.70652e-07	4.22395e-07	5.70814e-07	4.81868e-07	1.35625e-06	4.01416e-07	1.20646	0.769903	3.01869	0.954598	2.64095	0.609054	-0.828869	-1.29886	-0.331269	-1.04756	-0.378651	-1.64189
comp22963_c0_seq1	comp22963_c0_seq1 len=320 path=[0:0-319]	6.30661e-07	7.92471e-07	0	0	0	0	4.8913e-07	1.40798e-07	5.18922e-08	0	0	0	0.775583	0.17767	0	0	0	0	-1.28935	-5.62841	0	0	0	0
TC399513	TC399513 similar to UniRef100_Q10A50 Cluster: Zinc finger, C3HC4 type family protein, expressed; n=1; Oryza sativa Japonica Group|Rep: Zinc finger, C3HC4 type family protein, expressed - Oryza sativa subsp. japonica (Rice), partial (92%)	7.88327e-08	6.09593e-08	0	2.2435e-07	2.28242e-07	0	8.15217e-08	1.40798e-07	1.55677e-07	1.20467e-07	1.35625e-07	6.69027e-08	1.03411	2.30971	0	0.536962	0.594214	0	-0.967014	-0.432955	0	-1.86233	-1.68289	0
comp36306_c0_seq1	comp36306_c0_seq1 len=221 path=[0:0-220]	1.57665e-07	1.21919e-07	0	0	0	0	8.15217e-08	7.03992e-08	0	0	0	0	0.517056	0.577427	0	0	0	0	-1.93403	-1.73182	0	0	0	0
comp25050_c0_seq1	comp25050_c0_seq1 len=324 path=[0:0-323]	2.36498e-07	4.87675e-07	0	0	0	0	4.8913e-07	2.81597e-07	0	0	6.78124e-08	0	2.06822	0.577427	0	0	0	0	-0.483507	-1.73182	0	0	0	0
comp6404_c0_seq1	comp6404_c0_seq1 len=278 path=[0:0-277] : tr|C5XG07|C5XG07_SORBI Putative uncharacterized protein Sb03g030650 OS=Sorghum bicolor GN=Sb03g030650 PE=3 SV=1 e-value: 4e-06 blast score: 51.2	6.30661e-06	5.91305e-06	1.17238e-05	1.03201e-05	7.36082e-06	7.41466e-06	1.65489e-05	1.43614e-05	1.02747e-05	8.55316e-06	6.57781e-06	9.09876e-06	2.62406	2.42877	0.876395	0.828788	0.893624	1.22713	-0.381089	-0.411732	-1.14104	-1.20658	-1.11904	-0.814909
comp32352_c0_seq1	comp32352_c0_seq1 len=197 path=[0:0-196]	7.88327e-08	1.82878e-07	1.89093e-07	4.48699e-07	1.71182e-07	3.2954e-07	3.26087e-07	2.11197e-07	2.59461e-07	2.40934e-07	0	6.69027e-08	4.13645	1.15485	1.37213	0.536962	0	0.203018	-0.241753	-0.86591	-0.728792	-1.86233	0	-4.92567
comp37153_c0_seq1	comp37153_c0_seq1 len=243 path=[0:0-242]	1.57665e-07	2.43837e-07	1.89093e-07	0	1.71182e-07	1.09847e-07	1.63043e-07	0	0	1.20467e-07	4.06875e-07	1.33805e-07	1.03411	0	0	0	2.37686	1.21811	-0.967014	0	0	0	-0.420724	-0.820945
TC394951	TC394951 UniRef100_Q5XUV4 Cluster: Ubiquitin carrier protein; n=1; Triticum aestivum|Rep: Ubiquitin carrier protein - Triticum aestivum (Wheat), complete	3.15331e-07	6.09593e-07	1.32365e-06	3.92612e-07	5.70606e-07	3.2954e-07	1.05978e-06	4.92794e-07	2.07569e-07	8.4327e-07	2.03437e-07	8.02832e-07	3.36086	0.808398	0.156815	2.14785	0.356529	2.43622	-0.297543	-1.23701	-6.37693	-0.465583	-2.80482	-0.410473
comp16742_c0_seq1	comp16742_c0_seq1 len=415 path=[0:0-414]	1.18249e-06	1.15823e-06	9.45466e-07	2.13132e-06	2.45361e-06	1.70263e-06	3.26087e-07	0	1.55677e-07	1.20467e-07	6.78124e-08	6.69027e-08	0.275763	0	0.164656	0.0565223	0.0276379	0.0392938	-3.6263	0	-6.07327	-17.6921	-36.1822	-25.4493
comp38246_c0_seq1	comp38246_c0_seq1 len=146 path=[0:0-145] : tr|F2EA00|F2EA00_HORVD Predicted protein OS=Hordeum vulgare var. distichum PE=2 SV=1 e-value: 3e-12 blast score: 71.6	1.57665e-07	1.82878e-07	9.45466e-07	3.36524e-07	3.42364e-07	4.94311e-07	5.70652e-07	2.81597e-07	4.15138e-07	3.61401e-07	2.7125e-07	4.01416e-07	3.61939	1.53981	0.439083	1.07392	0.792286	0.812072	-0.27629	-0.649432	-2.27748	-0.931165	-1.26217	-1.23142
TC371425	TC371425 similar to UniRef100_Q7XI07 Cluster: Auxin-regulated protein-like protein; n=2; Oryza sativa Japonica Group|Rep: Auxin-regulated protein-like protein - Oryza sativa subsp. japonica (Rice), partial (64%)	8.59276e-06	7.1932e-06	1.04001e-05	1.00396e-05	1.23822e-05	9.50175e-06	1.06793e-05	9.08149e-06	1.03266e-05	8.55316e-06	7.32374e-06	1.13065e-05	1.24283	1.26251	0.992925	0.851939	0.591476	1.18994	-0.804615	-0.792073	-1.00713	-1.17379	-1.69069	-0.840376
TC269452	TC269452 similar to UniRef100_Q5W7C9 Cluster: Unknow protein; n=1; Oryza sativa Japonica Group|Rep: Unknow protein - Oryza sativa subsp. japonica (Rice), partial (25%)	4.17813e-06	3.9014e-06	3.97096e-06	5.60874e-06	6.27667e-06	4.88818e-06	3.0163e-06	2.95676e-06	8.40654e-06	3.61401e-06	4.13656e-06	4.34867e-06	0.721927	0.757873	2.11701	0.644354	0.659038	0.88963	-1.38518	-1.31948	-0.472365	-1.55194	-1.51736	-1.12406
comp2004_c0_seq1	comp2004_c0_seq1 len=535 path=[0:0-534] : tr|B8B5U7|B8B5U7_ORYSI Putative uncharacterized protein OS=Oryza sativa subsp. indica GN=OsI_27295 PE=4 SV=1 e-value: 6e-07 blast score: 54.7	2.23096e-05	2.37132e-05	2.51494e-05	2.44541e-05	2.15118e-05	2.39466e-05	3.08152e-05	2.90045e-05	2.62575e-05	2.48162e-05	2.38022e-05	2.85005e-05	1.38125	1.22314	1.04406	1.01481	1.10647	1.19017	-0.723981	-0.81757	-0.9578	-0.985408	-0.903777	-0.840216
comp44089_c0_seq1	comp44089_c0_seq1 len=108 path=[0:0-107]	1.57665e-07	0	0	5.60874e-08	0	0	8.15217e-08	0	0	0	0	0	0.517056	0	0	0	0	0	-1.93403	0	0	0	0	0
comp8084_c0_seq1	comp8084_c0_seq1 len=339 path=[0:0-338]	6.46428e-06	7.01032e-06	1.15347e-05	1.40779e-05	1.07274e-05	1.03256e-05	1.81793e-05	1.52062e-05	1.30249e-05	1.36128e-05	1.085e-05	1.27784e-05	2.81228	2.16912	1.1292	0.966959	1.01143	1.23755	-0.355584	-0.461017	-0.885584	-1.03417	-0.988701	-0.808051
comp2150_c0_seq1	comp2150_c0_seq1 len=537 path=[0:0-536] : tr|A3BYZ3|A3BYZ3_ORYSJ Putative uncharacterized protein OS=Oryza sativa subsp. japonica GN=OsJ_29414 PE=4 SV=1 e-value: 1e-20 blast score: 100	4.40675e-05	4.30982e-05	5.50261e-05	6.2257e-05	5.86012e-05	5.30011e-05	5.64946e-05	5.60377e-05	5.76523e-05	6.38476e-05	4.86215e-05	5.66665e-05	1.282	1.30023	1.04772	1.02555	0.829701	1.06916	-0.78003	-0.769093	-0.954449	-0.975088	-1.20525	-0.935315
comp5520_c0_seq1	comp5520_c0_seq1 len=397 path=[0:0-396]	9.22342e-06	9.20486e-06	1.60729e-05	1.76114e-05	1.71752e-05	1.41153e-05	1.14946e-05	8.1663e-06	1.29212e-05	1.59017e-05	1.16637e-05	1.39827e-05	1.24624	0.887173	0.803909	0.902916	0.679102	0.990602	-0.802416	-1.12718	-1.24392	-1.10752	-1.47253	-1.00949
TC372123	TC372123 similar to UniRef100_Q7XBR1 Cluster: Expressed protein; n=2; Oryza sativa|Rep: Expressed protein - Oryza sativa subsp. japonica (Rice), partial (48%)	5.83362e-06	6.33977e-06	1.05892e-05	8.80572e-06	6.21961e-06	6.26127e-06	9.61957e-06	9.64468e-06	6.12328e-06	7.58943e-06	4.61125e-06	4.14796e-06	1.64899	1.5213	0.578256	0.861875	0.741405	0.66248	-0.606432	-0.657333	-1.72934	-1.16026	-1.34879	-1.50948
TC423454	TC423454 similar to UniRef100_A7QKL4 Cluster: Chromosome chr2 scaffold_113, whole genome shotgun sequence; n=1; Vitis vinifera|Rep: Chromosome chr2 scaffold_113, whole genome shotgun sequence - Vitis vinifera (Grape), partial (44%)	7.88327e-08	2.43837e-07	1.89093e-07	5.60874e-07	2.28242e-07	4.39387e-07	3.26087e-07	2.81597e-07	2.07569e-07	3.61401e-07	2.7125e-07	2.00708e-07	4.13645	1.15485	1.09771	0.644354	1.18843	0.456791	-0.241753	-0.86591	-0.91099	-1.55194	-0.841447	-2.18919
comp23956_c0_seq1	comp23956_c0_seq1 len=308 path=[0:0-307]	3.15331e-07	5.48634e-07	0	0	0	0	2.44565e-07	4.22395e-07	0	0	0	0	0.775583	0.769903	0	0	0	0	-1.28935	-1.29886	0	0	0	0
comp290_c0_seq1	comp290_c0_seq1 len=434 path=[0:0-433] : tr|F2E877|F2E877_HORVD Predicted protein OS=Hordeum vulgare var. distichum PE=2 SV=1 e-value: 2e-27 blast score: 122	0.000159636	0.000155934	0.000180584	0.000179255	0.000190525	0.000166253	0.000131984	0.000152414	0.0001851	0.000177328	0.000174549	0.00018057	0.826778	0.977428	1.025	0.989246	0.916147	1.08612	-1.20951	-1.02309	-0.975605	-1.01087	-1.09153	-0.920712
BQ162361	BQ162361 similar to UniRef100_Q2HSS2 Cluster: F5O11.19, related; n=1; Medicago truncatula|Rep: F5O11.19, related - Medicago truncatula (Barrel medic), partial (23%) #or# CA608167	7.09494e-07	6.09593e-07	1.13456e-06	1.3461e-06	1.14121e-06	9.88621e-07	1.1413e-06	8.4479e-07	1.03784e-06	1.68654e-06	8.13749e-07	1.27115e-06	1.60862	1.38583	0.914755	1.25291	0.713057	1.28578	-0.621652	-0.721592	-1.09319	-0.798142	-1.40241	-0.777738
comp30355_c0_seq1	comp30355_c0_seq1 len=165 path=[0:0-164]	2.36498e-07	6.09593e-08	3.78187e-07	7.29136e-07	7.41788e-07	6.59081e-07	4.07609e-07	2.81597e-07	3.11353e-07	2.40934e-07	3.39062e-07	6.02124e-07	1.72352	4.61942	0.82328	0.330438	0.457088	0.913581	-0.580208	-0.216477	-1.21465	-3.02629	-2.18776	-1.09459
CD878351	CD878351	0	0	0	0	5.70606e-08	5.49234e-08	8.15217e-08	0	0	0	6.78124e-08	0	0	0	0	0	1.18843	0	0	0	0	0	-0.841447	0
comp22343_c0_seq1	comp22343_c0_seq1 len=370 path=[0:0-369]	3.15331e-07	7.31512e-07	0	0	0	0	5.70652e-07	7.74391e-07	0	0	0	6.69027e-08	1.80969	1.05862	0	0	0	0	-0.552579	-0.944629	0	0	0	0
comp4091_c0_seq1	comp4091_c0_seq1 len=1038 path=[0:0-1037] : tr|F2D1B0|F2D1B0_HORVD Predicted protein OS=Hordeum vulgare var. distichum PE=2 SV=1 e-value: 2e-16 blast score: 78.2	0.000110681	0.000121797	0.000157893	0.000170506	0.000190868	0.000135386	0.000126196	0.000137912	0.00014561	0.00015215	0.000136235	0.000166186	1.14017	1.13231	0.922205	0.892345	0.713768	1.2275	-0.877059	-0.883149	-1.08436	-1.12064	-1.40102	-0.814666
comp4758_c0_seq1	comp4758_c0_seq1 len=500 path=[0:0-499]	1.19037e-05	1.0546e-05	9.83285e-06	1.70506e-05	1.17545e-05	1.23028e-05	7.58152e-06	3.80155e-06	3.3211e-06	2.52981e-06	4.13656e-06	5.41911e-06	0.636903	0.360475	0.337756	0.148371	0.351913	0.440477	-1.5701	-2.77412	-2.96072	-6.73986	-2.84161	-2.27027
TC411602	TC411602 similar to UniRef100_Q0DS38 Cluster: Os03g0335600 protein; n=1; Oryza sativa Japonica Group|Rep: Os03g0335600 protein - Oryza sativa subsp. japonica (Rice), partial (4%)	2.36498e-06	2.68221e-06	2.08003e-06	2.01915e-06	2.56773e-06	1.8674e-06	2.03804e-06	2.25277e-06	2.90596e-06	2.89121e-06	2.64469e-06	2.4754e-06	0.861759	0.839894	1.39708	1.4319	1.02997	1.32559	-1.16042	-1.19063	-0.715778	-0.698374	-0.970901	-0.754382
comp20684_c0_seq1	comp20684_c0_seq1 len=348 path=[0:0-347]	7.88327e-07	6.70553e-07	0	0	0	0	5.70652e-07	6.33592e-07	0	1.20467e-07	6.78124e-08	0	0.723878	0.944881	0	0	0	0	-1.38145	-1.05833	0	0	0	0
comp19198_c0_seq1	comp19198_c0_seq1 len=331 path=[0:0-330]	1.41899e-06	7.92471e-07	5.6728e-07	1.57045e-06	1.883e-06	1.26324e-06	1.1413e-06	7.74391e-07	1.60866e-06	1.56607e-06	2.10219e-06	2.67611e-06	0.804309	0.977185	2.83574	0.997214	1.1164	2.11845	-1.2433	-1.02335	-0.352641	-1.00279	-0.895734	-0.472043
comp21783_c0_seq1	comp21783_c0_seq1 len=519 path=[0:0-163 164:164-518] : tr|D6BQM8|D6BQM8_9ROSI Ubiquinol-cytochrome C reductase complex 14 kDa protein OS=Jatropha curcas PE=2 SV=1 e-value: 6e-08 blast score: 57.8	8.67159e-07	5.48634e-07	0	0	0	0	8.15217e-07	7.74391e-07	0	0	0	6.69027e-08	0.940101	1.41149	0	0	0	0	-1.06372	-0.708472	0	0	0	0
TC275048	TC275048 similar to UniRef100_Q2QMJ7 Cluster: BZIP transcription factor family protein, expressed; n=1; Oryza sativa Japonica Group|Rep: BZIP transcription factor family protein, expressed - Oryza sativa subsp. japonica (Rice), partial (50%)	7.88327e-08	2.43837e-07	3.78187e-07	3.36524e-07	2.28242e-07	0	3.26087e-07	0	5.18922e-08	0	2.7125e-07	6.69027e-08	4.13645	0	0.137213	0	1.18843	0	-0.241753	0	-7.28792	0	-0.841447	0
comp43406_c0_seq1	comp43406_c0_seq1 len=125 path=[0:0-124]	7.88327e-08	6.09593e-08	0	0	0	0	1.63043e-07	0	2.07569e-07	1.20467e-07	6.78124e-08	0	2.06822	0	0	0	0	0	-0.483507	0	0	0	0	0
TC245870	TC245870 similar to UniRef100_A7QEQ4 Cluster: Chromosome chr16 scaffold_86, whole genome shotgun sequence; n=2; Vitis vinifera|Rep: Chromosome chr16 scaffold_86, whole genome shotgun sequence - Vitis vinifera (Grape), partial (12%)	1.89198e-06	1.40206e-06	1.89093e-06	2.58002e-06	2.11124e-06	1.6477e-06	2.11957e-06	2.11197e-06	2.54272e-06	1.68654e-06	2.03437e-06	1.80637e-06	1.12029	1.50633	1.34469	0.653692	0.963591	1.0963	-0.892628	-0.663864	-0.743666	-1.52977	-1.03779	-0.912161
TC370157	TC370157 similar to UniRef100_Q94B07 Cluster: Gamma hydroxybutyrate dehydrogenase; n=1; Arabidopsis thaliana|Rep: Gamma hydroxybutyrate dehydrogenase - Arabidopsis thaliana (Mouse-ear cress), partial (98%) #or# TC382108 similar to UniRef100_A7R5T2 Cluster: Chromosome undetermined scaffold_1050, whole genome shotgun sequence; n=1; Vitis vinifera|Rep: Chromosome undetermined scaffold_1050, whole ge…	3.31097e-06	2.98701e-06	5.86189e-06	3.30916e-06	3.02421e-06	2.25186e-06	3.26087e-06	3.02716e-06	2.54272e-06	2.77074e-06	2.44125e-06	2.4754e-06	0.984868	1.01344	0.433771	0.837296	0.807234	1.09927	-1.01536	-0.986735	-2.30536	-1.19432	-1.2388	-0.909696
CA660382	CA660382 similar to UniRef100_Q2QRI7 Cluster: Expressed protein; n=1; Oryza sativa Japonica Group|Rep: Expressed protein - Oryza sativa subsp. japonica (Rice), partial (16%)	0	0	0	0	5.70606e-08	0	0	0	0	0	6.78124e-08	0	0	0	0	0	1.18843	0	0	0	0	0	-0.841447	0
comp9848_c0_seq1	comp9848_c0_seq1 len=322 path=[0:0-321] : tr|F2CR59|F2CR59_HORVD Predicted protein OS=Hordeum vulgare var. distichum PE=2 SV=1 e-value: 3e-07 blast score: 54.7	2.60148e-06	2.98701e-06	3.02549e-06	2.74828e-06	4.39367e-06	2.52648e-06	2.52717e-06	2.18237e-06	3.73624e-06	3.01168e-06	2.7125e-06	2.87681e-06	0.971438	0.730622	1.23492	1.09584	0.617365	1.13867	-1.0294	-1.3687	-0.809769	-0.912542	-1.61979	-0.87822
TC420072	TC420072 UniRef100_Q6Z041 Cluster: Splicing coactivator subunit-like; n=1; Oryza sativa Japonica Group|Rep: Splicing coactivator subunit-like - Oryza sativa subsp. japonica (Rice), partial (11%)	0	6.09593e-08	0	1.68262e-07	1.14121e-07	5.49234e-08	1.63043e-07	2.11197e-07	2.07569e-07	3.61401e-07	0	0	0	3.46456	0	2.14785	0	0	0	-0.288637	0	-0.465583	0	0
comp18382_c0_seq1	comp18382_c0_seq1 len=365 path=[0:0-364]	1.42687e-05	1.43254e-05	1.8342e-05	2.05841e-05	2.24248e-05	2.08709e-05	1.54076e-05	1.3587e-05	1.74358e-05	1.77087e-05	1.69531e-05	2.0606e-05	1.07982	0.948455	0.950591	0.860309	0.755998	0.987309	-0.926082	-1.05435	-1.05198	-1.16237	-1.32276	-1.01285
CA606239	CA606239	7.88327e-08	1.21919e-07	0	5.60874e-08	5.70606e-08	5.49234e-08	8.15217e-08	0	0	2.40934e-07	0	0	1.03411	0	0	4.29569	0	0	-0.967014	0	0	-0.232791	0	0
comp3715_c0_seq1	comp3715_c0_seq1 len=840 path=[0:0-839] : tr|F2D7S8|F2D7S8_HORVD Predicted protein OS=Hordeum vulgare var. distichum PE=2 SV=1 e-value: 2e-25 blast score: 117	3.65784e-05	3.86482e-05	2.98767e-05	2.60246e-05	3.45787e-05	4.0149e-05	2.4212e-05	2.90749e-05	4.22922e-05	2.80688e-05	4.06197e-05	4.44903e-05	0.66192	0.752295	1.41555	1.07855	1.1747	1.10813	-1.51076	-1.32927	-0.706437	-0.927169	-0.851281	-0.902422
CK213378	CK213378 homologue to UniRef100_P36213 Cluster: Photosystem I reaction center subunit II, chloroplast precursor; n=1; Hordeum vulgare|Rep: Photosystem I reaction center subunit II, chloroplast precursor - Hordeum vulgare (Barley), partial (67%) #or# CK217815 similar to UniRef100_P36213 Cluster: Photosystem I reaction center subunit II, chloroplast precursor; n=1; Hordeum vulgare|Rep: Photosystem …	7.88327e-08	1.82878e-07	0	0	1.14121e-07	0	0	7.03992e-08	1.03784e-07	0	0	0	0	0.384951	0	0	0	0	0	-2.59773	0	0	0	0
comp4309_c0_seq1	comp4309_c0_seq1 len=365 path=[0:0-364]	7.7256e-06	9.20486e-06	1.53166e-05	1.87332e-05	1.12409e-05	1.48293e-05	9.04891e-06	9.99668e-06	8.56222e-06	1.31309e-05	7.05249e-06	9.70088e-06	1.17129	1.08602	0.559017	0.700944	0.627394	0.654169	-0.85376	-0.920792	-1.78885	-1.42665	-1.5939	-1.52866
TC240588	TC240588 similar to UniRef100_A7PS35 Cluster: Chromosome chr14 scaffold_27, whole genome shotgun sequence; n=1; Vitis vinifera|Rep: Chromosome chr14 scaffold_27, whole genome shotgun sequence - Vitis vinifera (Grape), partial (25%) #or# TC243629 similar to UniRef100_A7PS35 Cluster: Chromosome chr14 scaffold_27, whole genome shotgun sequence; n=1; Vitis vinifera|Rep: Chromosome chr14 scaffold_27, …	3.15331e-07	2.43837e-07	1.51275e-06	9.53486e-07	6.84727e-07	8.23851e-07	8.15217e-07	1.05599e-06	5.70814e-07	4.81868e-07	2.03437e-07	5.35221e-07	2.58528	4.3307	0.377337	0.505376	0.297107	0.649658	-0.386806	-0.230909	-2.65015	-1.97873	-3.36579	-1.53927
comp43928_c0_seq1	comp43928_c0_seq1 len=135 path=[0:0-134]	7.88327e-08	0	0	0	5.70606e-08	1.6477e-07	8.15217e-08	7.03992e-08	9.85952e-07	1.20467e-07	0	2.67611e-07	1.03411	0	0	0	0	1.62414	-0.967014	0	0	0	0	-0.615709
TC378188	TC378188 similar to UniRef100_A7NY64 Cluster: Chromosome chr6 scaffold_3, whole genome shotgun sequence; n=1; Vitis vinifera|Rep: Chromosome chr6 scaffold_3, whole genome shotgun sequence - Vitis vinifera (Grape), partial (69%)	3.94163e-07	7.92471e-07	1.89093e-07	5.04787e-07	5.13545e-07	6.59081e-07	2.44565e-07	2.11197e-07	8.30275e-07	3.61401e-07	1.15281e-06	7.35929e-07	0.620467	0.266505	4.39083	0.715949	2.24481	1.1166	-1.61169	-3.75228	-0.227748	-1.39675	-0.445472	-0.895577
GH726846	GH726846	1.97082e-06	2.49933e-06	9.45466e-07	6.16961e-07	8.55909e-07	3.13063e-06	1.05978e-06	6.33592e-07	4.04759e-06	1.68654e-06	5.22156e-06	2.6092e-06	0.537738	0.253505	4.28105	2.73362	6.1006	0.833442	-1.85964	-3.9447	-0.233587	-0.365815	-0.163918	-1.19984
comp49849_c0_seq1	comp49849_c0_seq1 len=115 path=[0:0-114]	7.88327e-08	0	0	5.60874e-08	0	0	8.15217e-08	0	0	0	0	0	1.03411	0	0	0	0	0	-0.967014	0	0	0	0	0
comp7059_c0_seq1	comp7059_c0_seq1 len=244 path=[0:0-243]	5.67595e-06	3.2918e-06	1.0211e-05	8.58137e-06	1.46075e-05	7.68928e-06	1.02717e-05	1.09119e-05	8.51032e-06	1.39742e-05	8.74781e-06	1.41834e-05	1.80969	3.31486	0.833444	1.62843	0.598857	1.84456	-0.552579	-0.301672	-1.19984	-0.614088	-1.66985	-0.542134
comp5982_c0_seq1	comp5982_c0_seq1 len=394 path=[0:0-393]	6.85844e-06	8.65622e-06	5.6728e-06	8.4692e-06	6.84727e-06	8.07374e-06	9.94565e-06	1.01375e-05	5.76004e-06	5.42102e-06	6.17093e-06	6.42265e-06	1.45013	1.17112	1.01538	0.640087	0.901225	0.795499	-0.689592	-0.853883	-0.984854	-1.56229	-1.1096	-1.25707
CJ893648	CJ893648 weakly similar to UniRef100_Q2R0J2 Cluster: Serine carboxypeptidase family protein; n=1; Oryza sativa Japonica Group|Rep: Serine carboxypeptidase family protein - Oryza sativa subsp. japonica (Rice), partial (19%)	7.09494e-07	1.03631e-06	9.45466e-07	5.60874e-07	1.76888e-06	9.88621e-07	9.78261e-07	1.40798e-06	9.85952e-07	1.0842e-06	5.425e-07	6.69027e-07	1.37882	1.35865	1.04282	1.93306	0.306691	0.676727	-0.72526	-0.736023	-0.958937	-0.517314	-3.26061	-1.4777
comp5829_c0_seq1	comp5829_c0_seq1 len=383 path=[0:0-44 45:45-65 379:66-66 66:67-382]	5.25814e-05	4.24277e-05	5.31352e-05	5.09274e-05	5.48923e-05	5.19575e-05	4.92391e-05	4.44923e-05	5.74447e-05	4.10793e-05	5.05881e-05	5.65996e-05	0.936437	1.04866	1.0811	0.806625	0.921588	1.08934	-1.06788	-0.953597	-0.92498	-1.23973	-1.08508	-0.917984
comp17430_c0_seq1	comp17430_c0_seq1 len=320 path=[0:0-319]	7.09494e-07	1.58494e-06	3.02549e-06	3.42133e-06	2.22536e-06	2.14201e-06	1.46739e-06	1.47838e-06	1.81623e-06	2.16841e-06	1.83094e-06	2.00708e-06	2.06822	0.932767	0.600308	0.633791	0.822758	0.937006	-0.483507	-1.07208	-1.66581	-1.57781	-1.21542	-1.06723
TC240183	TC240183 similar to UniRef100_Q0DXV3 Cluster: Os02g0731600 protein; n=2; Oryza sativa Japonica Group|Rep: Os02g0731600 protein - Oryza sativa subsp. japonica (Rice), partial (87%) #or# TC246647 similar to UniRef100_Q0DXV3 Cluster: Os02g0731600 protein; n=2; Oryza sativa Japonica Group|Rep: Os02g0731600 protein - Oryza sativa subsp. japonica (Rice), partial (97%)	1.59242e-05	1.67029e-05	4.34914e-06	4.76743e-06	4.50779e-06	1.05453e-05	7.98913e-06	1.31646e-05	1.01709e-05	8.4327e-06	9.69718e-06	7.02478e-06	0.501698	0.788167	2.33859	1.76881	2.15121	0.666153	-1.99323	-1.26877	-0.427608	-0.56535	-0.464856	-1.50116
TC383170	TC383170 #or# TC392691	1.49782e-06	1.6459e-06	1.70184e-06	2.18741e-06	2.33948e-06	1.97724e-06	1.38587e-06	1.47838e-06	2.12758e-06	1.56607e-06	2.30562e-06	1.80637e-06	0.925257	0.89822	1.25017	0.715949	0.985526	0.913581	-1.08078	-1.11331	-0.799894	-1.39675	-1.01469	-1.09459
comp28385_c0_seq1	comp28385_c0_seq1 len=143 path=[0:0-142]	2.36498e-07	1.82878e-07	1.89093e-07	5.60874e-08	0	1.6477e-07	0	1.40798e-07	1.55677e-07	0	1.35625e-07	6.69027e-08	0	0.769903	0.82328	0	0	0.406036	0	-1.29886	-1.21465	0	0	-2.46284
comp35226_c0_seq1	comp35226_c0_seq1 len=124 path=[1:0-123] : tr|O81607|O81607_SORBI 1-aminocyclopropane-1-carboxylate oxidase (Fragment) OS=Sorghum bicolor GN=ACO2 PE=2 SV=1 e-value: 2e-09 blast score: 62.4	7.88327e-08	1.21919e-07	0	0	0	0	3.26087e-07	0	5.18922e-08	0	0	0	4.13645	0	0	0	0	0	-0.241753	0	0	0	0	0
comp12560_c0_seq1	comp12560_c0_seq1 len=283 path=[0:0-282]	5.51829e-06	4.75483e-06	5.29461e-06	6.95484e-06	4.96427e-06	5.71203e-06	8.80435e-06	7.11031e-06	5.24111e-06	5.90289e-06	4.20437e-06	6.15504e-06	1.59549	1.49539	0.989896	0.848746	0.846926	1.07756	-0.626768	-0.668723	-1.01021	-1.17821	-1.18074	-0.928025
CA642935	CA642935 weakly similar to UniRef100_Q8LPV6 Cluster: Pyruvate kinase; n=1; Deschampsia antarctica|Rep: Pyruvate kinase - Deschampsia antarctica (Antarctic hairgrass), partial (8%) #or# TC371532 similar to UniRef100_Q8LPV6 Cluster: Pyruvate kinase; n=1; Deschampsia antarctica|Rep: Pyruvate kinase - Deschampsia antarctica (Antarctic hairgrass), partial (32%) #or# TC391255 weakly similar to UniRef10…	1.57665e-07	6.09593e-08	0	2.80437e-07	5.70606e-07	1.09847e-07	2.44565e-07	3.51996e-07	4.15138e-07	2.40934e-07	6.78124e-08	4.68319e-07	1.55117	5.77427	0	0.859138	0.118843	4.26338	-0.644676	-0.173182	0	-1.16396	-8.41447	-0.234556
comp12131_c0_seq1	comp12131_c0_seq1 len=131 path=[0:0-130]	8.67159e-07	4.87675e-07	7.56373e-07	7.29136e-07	8.55909e-07	6.04157e-07	7.33696e-07	6.33592e-07	5.70814e-07	1.20467e-07	2.7125e-07	2.00708e-07	0.846091	1.29921	0.754673	0.165219	0.316914	0.332211	-1.18191	-0.769698	-1.32508	-6.05258	-3.15543	-3.01013
CK205670	CK205670 similar to UniRef100_A7PH84 Cluster: Chromosome chr17 scaffold_16, whole genome shotgun sequence; n=1; Vitis vinifera|Rep: Chromosome chr17 scaffold_16, whole genome shotgun sequence - Vitis vinifera (Grape), partial (11%)	6.85844e-06	5.30346e-06	8.3201e-06	1.12175e-05	7.8173e-06	1.07101e-05	1.19837e-05	1.14751e-05	8.61411e-06	1.1083e-05	6.71343e-06	9.83469e-06	1.74729	2.16369	1.03534	0.988009	0.858791	0.918266	-0.572314	-0.462173	-0.965869	-1.01214	-1.16443	-1.08901
TC376047	TC376047 homologue to UniRef100_P00871 Cluster: Ribulose bisphosphate carboxylase small chain PWS4.3, chloroplast precursor; n=1; Triticum aestivum|Rep: Ribulose bisphosphate carboxylase small chain PWS4.3, chloroplast precursor - Triticum aestivum (Wheat), complete #or# TC450117 homologue to UniRef100_Q9FEE4 Cluster: Ribulose bisphosphate carboxylase small chain; n=1; Triticum aestivum|Rep: Ribu…	6.70866e-05	6.53484e-05	3.46041e-05	3.4662e-05	3.766e-05	5.16829e-05	4.85054e-05	5.39962e-05	5.23074e-05	5.21623e-05	5.97428e-05	5.03777e-05	0.723027	0.826281	1.5116	1.50488	1.58637	0.974745	-1.38307	-1.21024	-0.661553	-0.664504	-0.630369	-1.02591
comp5197_c0_seq1	comp5197_c0_seq1 len=392 path=[0:0-391] : tr|G8H386|G8H386_MAIZE Auxin regulated gene involved in organ size 6 OS=Zea mays GN=ZAR6 PE=4 SV=1 e-value: 7e-18 blast score: 90.1	8.04093e-06	8.04663e-06	1.45602e-05	1.49753e-05	1.45505e-05	9.83129e-06	9.86413e-06	9.15189e-06	1.8785e-05	1.20467e-05	7.86624e-06	1.20425e-05	1.22674	1.13736	1.29016	0.804437	0.540618	1.22491	-0.815169	-0.879232	-0.775097	-1.24311	-1.84973	-0.816384
TC372534	TC372534 similar to UniRef100_Q43323 Cluster: Membrane protein; n=1; Saccharum hybrid cultivar H65-7052|Rep: Membrane protein - Saccharum hybrid cultivar H65-7052, partial (74%) #or# TC414048 similar to UniRef100_Q43323 Cluster: Membrane protein; n=1; Saccharum hybrid cultivar H65-7052|Rep: Membrane protein - Saccharum hybrid cultivar H65-7052, partial (61%)	0	0	0	0	5.70606e-08	1.09847e-07	0	1.40798e-07	0	0	0	1.33805e-07	0	0	0	0	0	1.21811	0	0	0	0	0	-0.820945
comp2239_c0_seq1	comp2239_c0_seq1 len=396 path=[0:0-395]	2.2152e-05	2.65783e-05	2.87422e-05	4.21216e-05	3.84018e-05	3.24597e-05	2.09511e-05	1.63326e-05	1.32844e-05	1.32514e-05	1.39016e-05	1.60566e-05	0.945789	0.61451	0.462192	0.314598	0.362003	0.494663	-1.05732	-1.62731	-2.1636	-3.17866	-2.76241	-2.02158
comp3103_c0_seq1	comp3103_c0_seq1 len=437 path=[96:0-154 251:155-163 260:164-436] : tr|B9T427|B9T427_RICCO Ribulose bisphosphate carboxylase/oxygenase activase 1, chloroplast, putative OS=Ricinus communis GN=RCOM_0233730 PE=4 SV=1 e-value: 1e-13 blast score: 75.9	9.06576e-06	1.02412e-05	0	0	0	0	9.375e-06	9.64468e-06	0	1.20467e-07	0	1.33805e-07	1.03411	0.941756	0	0	0	0	-0.967014	-1.06185	0	0	0	0
TC415151	TC415151 similar to UniRef100_O49931 Cluster: Rieske iron-sulfur protein Tic55 precursor; n=1; Pisum sativum|Rep: Rieske iron-sulfur protein Tic55 precursor - Pisum sativum (Garden pea), partial (12%)	1.11154e-05	1.06679e-05	2.76076e-05	2.70341e-05	2.49355e-05	1.76853e-05	1.76087e-05	1.79518e-05	3.08759e-05	2.42139e-05	2.32597e-05	2.8166e-05	1.58417	1.68279	1.11838	0.895679	0.932794	1.59262	-0.631245	-0.594252	-0.894149	-1.11647	-1.07205	-0.627896
comp1489_c0_seq1	comp1489_c0_seq1 len=445 path=[0:0-444]	3.17696e-05	4.07208e-05	3.91423e-05	2.1818e-05	2.28242e-05	2.23538e-05	6.41576e-05	5.85017e-05	3.03051e-05	1.61426e-05	2.10897e-05	3.04407e-05	2.01947	1.43665	0.774228	0.739875	0.924003	1.36177	-0.49518	-0.696062	-1.29161	-1.35158	-1.08225	-0.73434
comp8023_c0_seq1	comp8023_c0_seq1 len=336 path=[0:0-335]	5.20296e-06	4.93771e-06	5.10552e-06	5.83309e-06	4.56485e-06	5.93173e-06	9.04891e-06	7.39191e-06	6.6422e-06	5.42102e-06	5.01812e-06	4.61628e-06	1.73919	1.49703	1.30099	0.929356	1.0993	0.778236	-0.574981	-0.667988	-0.768648	-1.07601	-0.909673	-1.28496
CK217276	CK217276 homologue to UniRef100_Q9ZRS5 Cluster: Ribulose bisphosphate carboxylase small chain; n=1; Secale cereale|Rep: Ribulose bisphosphate carboxylase small chain - Secale cereale (Rye), complete #or# TC370862 homologue to UniRef100_Q9ZRS5 Cluster: Ribulose bisphosphate carboxylase small chain; n=1; Secale cereale|Rep: Ribulose bisphosphate carboxylase small chain - Secale cereale (Rye), compl…	5.51829e-07	3.65756e-07	9.45466e-07	2.80437e-07	3.42364e-07	2.19694e-07	1.63043e-07	2.81597e-07	2.59461e-07	8.4327e-07	3.39062e-07	5.35221e-07	0.29546	0.769903	0.274427	3.00698	0.990357	2.43622	-3.38455	-1.29886	-3.64396	-0.332559	-1.00974	-0.410473
comp14967_c0_seq1	comp14967_c0_seq1 len=197 path=[0:0-196]	1.18249e-06	6.70553e-07	1.51275e-06	1.3461e-06	1.48358e-06	1.48293e-06	1.05978e-06	1.26718e-06	1.3492e-06	1.56607e-06	1.01719e-06	1.40496e-06	0.89623	1.88976	0.891886	1.16342	0.685632	0.947417	-1.11579	-0.529167	-1.12122	-0.859537	-1.45851	-1.0555
comp4435_c0_seq1	comp4435_c0_seq1 len=343 path=[0:0-342] : tr|B9G098|B9G098_ORYSJ Putative uncharacterized protein OS=Oryza sativa subsp. japonica GN=OsJ_26861 PE=4 SV=1 e-value: 5e-05 blast score: 47.4	2.04177e-05	2.07871e-05	2.26912e-05	2.61367e-05	2.73891e-05	2.0816e-05	1.94022e-05	1.73886e-05	2.15872e-05	2.20455e-05	2.00725e-05	2.52223e-05	0.950264	0.836508	0.951346	0.843467	0.732864	1.21168	-1.05234	-1.19545	-1.05114	-1.18558	-1.36451	-0.8253
comp9501_c0_seq1	comp9501_c0_seq1 len=511 path=[0:0-510]	1.20614e-05	8.71718e-06	1.4182e-05	1.91258e-05	1.73464e-05	1.21381e-05	1.50815e-05	1.18271e-05	6.84977e-06	7.58943e-06	8.06968e-06	9.70088e-06	1.2504	1.35675	0.482991	0.396816	0.465207	0.799211	-0.799747	-0.737054	-2.07043	-2.52006	-2.14958	-1.25123
comp6605_c0_seq1	comp6605_c0_seq1 len=491 path=[0:0-490]	7.56794e-06	7.74183e-06	1.47493e-05	1.43584e-05	1.34092e-05	9.6116e-06	1.15761e-05	1.06303e-05	1.22466e-05	1.25286e-05	9.22249e-06	1.07044e-05	1.52962	1.37309	0.830316	0.872562	0.687771	1.1137	-0.653756	-0.728282	-1.20436	-1.14605	-1.45397	-0.897909
TC368776	TC368776 UniRef100_Q6B6M0 Cluster: UDP-D-glucuronate decarboxylase; n=1; Hordeum vulgare|Rep: UDP-D-glucuronate decarboxylase - Hordeum vulgare (Barley), partial (67%) #or# TC386170 homologue to UniRef100_Q6B6M0 Cluster: UDP-D-glucuronate decarboxylase; n=1; Hordeum vulgare|Rep: UDP-D-glucuronate decarboxylase - Hordeum vulgare (Barley), partial (65%) #or# TC414628 homologue to UniRef100_Q6B6M0 C…	0	6.09593e-08	0	0	5.70606e-08	0	0	0	5.18922e-08	1.20467e-07	1.35625e-07	0	0	0	0	0	2.37686	0	0	0	0	0	-0.420724	0
comp19077_c0_seq1	comp19077_c0_seq1 len=317 path=[0:0-222 304:223-261 249:262-316]	7.88327e-07	7.92471e-07	0	0	0	0	6.52174e-07	8.4479e-07	0	0	0	0	0.827289	1.06602	0	0	0	0	-1.20877	-0.938069	0	0	0	0
comp17690_c0_seq1	comp17690_c0_seq1 len=280 path=[0:0-279] : tr|F2CXS4|F2CXS4_HORVD Predicted protein OS=Hordeum vulgare var. distichum PE=2 SV=1 e-value: 2e-10 blast score: 65.5	9.45992e-07	8.53431e-07	0	1.12175e-07	2.85303e-07	7.14004e-07	6.52174e-07	2.81597e-07	4.6703e-07	0	1.15281e-06	8.69734e-07	0.689408	0.329958	0	0	4.04066	1.21811	-1.45052	-3.03068	0	0	-0.247485	-0.820945
CK208374	CK208374 weakly similar to UniRef100_Q2QXW8 Cluster: Zinc finger, C3HC4 type family protein, expressed; n=1; Oryza sativa Japonica Group|Rep: Zinc finger, C3HC4 type family protein, expressed - Oryza sativa subsp. japonica (Rice), partial (27%) #or# TC399995 weakly similar to UniRef100_Q2QXW8 Cluster: Zinc finger, C3HC4 type family protein, expressed; n=1; Oryza sativa Japonica Group|Rep: Zinc fi…	9.45992e-07	1.15823e-06	2.26912e-06	1.96306e-06	1.65476e-06	2.80109e-06	2.28261e-06	1.83038e-06	1.60866e-06	1.92747e-06	1.01719e-06	1.60566e-06	2.41293	1.58033	0.708935	0.981873	0.614704	0.573227	-0.414435	-0.63278	-1.41057	-1.01846	-1.6268	-1.74451
comp5031_c0_seq1	comp5031_c0_seq1 len=445 path=[0:0-252 253:253-444]	7.41027e-06	7.98567e-06	8.88738e-06	1.14418e-05	1.02138e-05	1.02158e-05	5.21739e-06	7.18071e-06	1.13125e-05	8.55316e-06	1.24775e-05	9.29947e-06	0.704076	0.8992	1.27287	0.747535	1.22162	0.910307	-1.4203	-1.1121	-0.785625	-1.33773	-0.818582	-1.09853
comp476_c0_seq1	comp476_c0_seq1 len=505 path=[0:0-504] : tr|Q9ATG2|Q9ATG2_CASSA Calmodulin (Fragment) OS=Castanea sativa PE=2 SV=1 e-value: 1e-05 blast score: 50.1	9.73583e-05	9.49746e-05	0.00017718	0.000229285	0.000184876	0.000164825	0.00014625	0.000132773	0.000157078	0.000196482	0.000111755	0.000143038	1.50218	1.39798	0.886541	0.856932	0.604485	0.867816	-0.665698	-0.715317	-1.12798	-1.16695	-1.6543	-1.15232
comp21560_c0_seq1	comp21560_c0_seq1 len=270 path=[0:0-269]	5.51829e-07	6.09593e-07	3.78187e-07	4.48699e-07	5.13545e-07	4.39387e-07	3.26087e-07	3.51996e-07	2.59461e-07	1.20467e-07	6.10312e-07	6.02124e-07	0.590921	0.577427	0.686067	0.268481	1.18843	1.37037	-1.69227	-1.73182	-1.45758	-3.72466	-0.841447	-0.729729
GH727124	GH727124 similar to UniRef100_Q70AH7 Cluster: Receptor-like kinase with LRR repeats; n=1; Triticum aestivum|Rep: Receptor-like kinase with LRR repeats - Triticum aestivum (Wheat), complete	2.36498e-07	3.04797e-07	9.45466e-07	1.00957e-06	5.70606e-07	3.2954e-07	1.63043e-06	8.4479e-07	6.22707e-07	3.61401e-07	2.7125e-07	5.35221e-07	6.89408	2.77165	0.658624	0.357974	0.475371	1.62414	-0.145052	-0.360796	-1.51832	-2.7935	-2.10362	-0.615709
comp44029_c0_seq1	comp44029_c0_seq1 len=186 path=[0:0-185] : tr|F2E8K9|F2E8K9_HORVD Predicted protein OS=Hordeum vulgare var. distichum PE=2 SV=1 e-value: 2e-05 blast score: 48.9	1.57665e-07	2.43837e-07	0	1.12175e-07	1.14121e-07	1.09847e-07	8.15217e-08	0	0	0	0	0	0.517056	0	0	0	0	0	-1.93403	0	0	0	0	0
comp20708_c0_seq1	comp20708_c0_seq1 len=326 path=[0:0-325]	1.41899e-06	1.76782e-06	2.45821e-06	3.02872e-06	2.28242e-06	2.41663e-06	2.6087e-06	1.97118e-06	3.06164e-06	3.01168e-06	1.89875e-06	2.4754e-06	1.83842	1.11503	1.24547	0.994373	0.8319	1.02432	-0.543945	-0.896835	-0.802907	-1.00566	-1.20207	-0.976259
comp4333_c0_seq1	comp4333_c0_seq1 len=521 path=[0:0-520]	1.33227e-05	1.35939e-05	1.60729e-05	1.02079e-05	1.17545e-05	1.12044e-05	1.26359e-05	1.3235e-05	1.30249e-05	7.95083e-06	1.6614e-05	1.28453e-05	0.948445	0.973599	0.810366	0.778889	1.41342	1.14645	-1.05436	-1.02712	-1.23401	-1.28388	-0.707503	-0.872254
comp13763_c0_seq1	comp13763_c0_seq1 len=217 path=[0:0-216]	2.99564e-06	3.9014e-06	5.86189e-06	4.8796e-06	4.39367e-06	5.65711e-06	6.19565e-06	5.42073e-06	4.41084e-06	4.33682e-06	3.7975e-06	4.54938e-06	2.06822	1.38943	0.75246	0.888764	0.864312	0.804188	-0.483507	-0.719717	-1.32897	-1.12516	-1.15699	-1.24349
CK209902	CK209902 similar to UniRef100_A5JQJ1 Cluster: IDS1 protein; n=1; Lolium multiflorum|Rep: IDS1 protein - Lolium multiflorum (Italian ryegrass) (Lolium perenne subsp.multiflorum), partial (38%)	1.26132e-06	1.09727e-06	4.91642e-06	2.74828e-06	3.88012e-06	2.19694e-06	3.09783e-06	2.32317e-06	1.71244e-06	2.65028e-06	2.03437e-06	3.27823e-06	2.45601	2.11723	0.348311	0.964339	0.524307	1.49218	-0.407164	-0.472315	-2.871	-1.03698	-1.90728	-0.670159
comp18025_c0_seq1	comp18025_c0_seq1 len=335 path=[0:0-334]	1.89198e-06	1.03631e-06	3.02549e-06	4.54308e-06	3.25245e-06	2.14201e-06	4.4837e-06	3.73116e-06	2.75029e-06	2.77074e-06	2.10219e-06	2.4754e-06	2.36984	3.60043	0.909038	0.609882	0.646338	1.15564	-0.42197	-0.277745	-1.10006	-1.63966	-1.54718	-0.865321
comp207_c0_seq1	comp207_c0_seq1 len=465 path=[0:0-464]	0.000317459	0.000346554	0.000113267	0.000163887	0.000177744	0.000278132	0.000327717	0.000340802	0.000465577	0.000193952	0.000342385	0.000221582	1.03231	0.983404	4.11044	1.18345	1.92628	0.796677	-0.968698	-1.01688	-0.243283	-0.844989	-0.519134	-1.25521
comp20374_c0_seq1	comp20374_c0_seq1 len=180 path=[0:0-179]	2.36498e-07	6.09593e-08	5.6728e-07	3.36524e-07	2.85303e-07	2.74617e-07	3.26087e-07	2.11197e-07	3.63246e-07	4.81868e-07	3.39062e-07	5.35221e-07	1.37882	3.46456	0.640329	1.4319	1.18843	1.94897	-0.72526	-0.288637	-1.5617	-0.698374	-0.841447	-0.513091
comp14115_c0_seq1	comp14115_c0_seq1 len=402 path=[0:0-401]	8.75043e-06	1.03631e-05	6.42917e-06	9.70312e-06	1.02709e-05	9.55667e-06	6.7663e-06	8.2367e-06	1.12087e-05	6.38476e-06	1.18672e-05	8.29593e-06	0.773254	0.794812	1.74342	0.658011	1.15542	0.868077	-1.29324	-1.25816	-0.573587	-1.51973	-0.865489	-1.15197
comp37766_c0_seq1	comp37766_c0_seq1 len=142 path=[0:0-141]	0	1.82878e-07	0	3.36524e-07	3.42364e-07	2.74617e-07	4.07609e-07	2.11197e-07	1.55677e-07	3.61401e-07	2.7125e-07	1.33805e-07	0	1.15485	0	1.07392	0.792286	0.487243	0	-0.86591	0	-0.931165	-1.26217	-2.05236
TC379052	TC379052 similar to UniRef100_A7P048 Cluster: Chromosome chr6 scaffold_3, whole genome shotgun sequence; n=1; Vitis vinifera|Rep: Chromosome chr6 scaffold_3, whole genome shotgun sequence - Vitis vinifera (Grape), partial (15%)	8.82926e-06	6.70553e-06	3.49823e-05	2.71463e-05	2.85303e-05	1.31267e-05	2.00543e-05	1.69662e-05	2.12239e-05	2.42139e-05	1.22062e-05	2.24793e-05	2.27135	2.53018	0.606705	0.891977	0.427834	1.71249	-0.440266	-0.395229	-1.64825	-1.1211	-2.33735	-0.583946
EY682160	EY682160 homologue to UniRef100_Q9AXP2 Cluster: Ribulose bisphosphate carboxylase small chain; n=1; Citrus reticulata|Rep: Ribulose bisphosphate carboxylase small chain - Citrus reticulata (Tangerine), partial (59%)	7.88327e-08	6.09593e-08	0	0	0	0	1.63043e-07	2.81597e-07	0	0	0	0	2.06822	4.61942	0	0	0	0	-0.483507	-0.216477	0	0	0	0
comp18835_c0_seq1	comp18835_c0_seq1 len=262 path=[0:0-261]	4.72996e-06	4.26715e-06	1.60729e-05	1.77236e-05	2.00283e-05	9.22713e-06	3.50543e-06	5.77273e-06	1.00152e-05	1.2649e-05	9.29031e-06	1.5789e-05	0.741113	1.35283	0.62311	0.713683	0.46386	1.71115	-1.34932	-0.739191	-1.60485	-1.40118	-2.15583	-0.584402
comp9627_c0_seq1	comp9627_c0_seq1 len=556 path=[0:0-555]	8.1986e-06	6.82744e-06	7.56373e-06	1.02079e-05	9.7003e-06	8.51313e-06	6.52174e-06	5.13914e-06	6.84977e-06	4.69822e-06	5.22156e-06	5.95434e-06	0.79547	0.752718	0.905608	0.460253	0.538288	0.69943	-1.25712	-1.32852	-1.10423	-2.17272	-1.85774	-1.42974
comp21434_c0_seq1	comp21434_c0_seq1 len=283 path=[0:0-282]	4.41463e-06	3.5966e-06	5.86189e-06	8.13267e-06	5.87724e-06	5.38249e-06	7.82609e-06	5.06874e-06	6.33085e-06	6.38476e-06	5.425e-06	4.68319e-06	1.77276	1.40931	1.08	0.785075	0.923051	0.870077	-0.564091	-0.709565	-0.925925	-1.27376	-1.08336	-1.14932
comp2964_c0_seq1	comp2964_c0_seq1 len=327 path=[0:0-326]	1.35592e-05	1.28624e-05	1.60729e-05	2.50711e-05	1.88871e-05	1.74107e-05	2.01359e-05	1.7459e-05	1.3959e-05	1.19262e-05	1.39016e-05	1.73278e-05	1.48503	1.35736	0.868479	0.475697	0.736036	0.995237	-0.673386	-0.736722	-1.15144	-2.10218	-1.35863	-1.00479
comp1092_c0_seq1	comp1092_c0_seq1 len=252 path=[0:0-251] : tr|Q5M9R1|Q5M9R1_TOBAC Putative uncharacterized protein orf138b OS=Nicotiana tabacum GN=orf138c PE=4 SV=1 e-value: 2e-40 blast score: 165	0.000206069	0.000223416	0	0	1.14121e-07	5.49234e-08	0.000242038	0.000235133	2.38704e-06	3.01168e-06	4.54343e-06	1.73947e-06	1.17455	1.05245	0	0	39.8124	31.6708	-0.851389	-0.950168	0	0	-0.0251178	-0.0315748
comp22139_c0_seq1	comp22139_c0_seq1 len=328 path=[0:0-327]	4.72996e-07	7.92471e-07	5.6728e-07	6.73049e-07	9.7003e-07	2.19694e-07	2.44565e-07	7.03992e-08	2.59461e-07	4.81868e-07	2.03437e-07	1.33805e-07	0.517056	0.088835	0.457378	0.715949	0.209723	0.609054	-1.93403	-11.2568	-2.18638	-1.39675	-4.7682	-1.64189
comp7380_c0_seq1	comp7380_c0_seq1 len=550 path=[0:0-549]	7.56794e-06	6.94936e-06	7.75282e-06	9.59094e-06	8.90145e-06	8.62298e-06	7.01087e-06	6.33592e-06	8.92546e-06	7.34849e-06	7.59499e-06	7.22549e-06	0.926391	0.911727	1.15125	0.766191	0.853231	0.837934	-1.07946	-1.09682	-0.868619	-1.30516	-1.17202	-1.19341
comp13666_c0_seq1	comp13666_c0_seq1 len=376 path=[0:0-375] : tr|F2DNE5|F2DNE5_HORVD Proteasome subunit beta type OS=Hordeum vulgare var. distichum PE=2 SV=1 e-value: 5e-29 blast score: 127	1.80527e-05	1.78001e-05	2.94985e-05	3.51107e-05	2.8245e-05	2.61435e-05	2.88587e-05	2.16829e-05	2.86445e-05	2.33706e-05	1.82415e-05	2.28807e-05	1.59858	1.21813	0.971048	0.665626	0.645833	0.875195	-0.625554	-0.820928	-1.02982	-1.50234	-1.54839	-1.1426
comp3426_c0_seq1	comp3426_c0_seq1 len=626 path=[0:0-625]	1.62395e-05	1.82268e-05	9.26557e-06	1.23953e-05	1.52922e-05	1.37858e-05	9.53804e-06	7.9551e-06	1.00152e-05	6.14382e-06	1.48509e-05	8.69734e-06	0.587335	0.43645	1.0809	0.495657	0.971141	0.630893	-1.70261	-2.29121	-0.925151	-2.01753	-1.02972	-1.58506
comp10783_c0_seq1	comp10783_c0_seq1 len=305 path=[176:0-156 20:157-304]	2.73549e-05	3.01139e-05	4.27351e-05	4.73938e-05	4.38796e-05	3.52608e-05	3.66033e-05	3.23836e-05	4.00608e-05	3.8429e-05	3.49912e-05	3.82683e-05	1.33809	1.07537	0.937422	0.810844	0.797437	1.08529	-0.747336	-0.929912	-1.06676	-1.23328	-1.25402	-0.921411
comp22408_c0_seq1	comp22408_c0_seq1 len=306 path=[0:0-305]	5.04529e-06	3.71852e-06	5.4837e-06	5.49656e-06	6.33373e-06	5.93173e-06	5.54348e-06	5.20954e-06	7.00545e-06	4.69822e-06	5.69625e-06	6.35575e-06	1.09874	1.40097	1.2775	0.854755	0.899351	1.07148	-0.910131	-0.713791	-0.782777	-1.16993	-1.11191	-0.933285
comp27136_c0_seq1	comp27136_c0_seq1 len=228 path=[0:0-227]	2.36498e-07	3.65756e-07	0	0	0	0	2.44565e-07	7.03992e-08	0	0	0	0	1.03411	0.192476	0	0	0	0	-0.967014	-5.19546	0	0	0	0
comp4312_c0_seq1	comp4312_c0_seq1 len=469 path=[0:0-468] : tr|C0PRC9|C0PRC9_PICSI Putative uncharacterized protein OS=Picea sitchensis PE=2 SV=1 e-value: 2e-31 blast score: 135	8.1986e-06	7.1932e-06	0	0	0	0	8.31522e-06	7.03992e-06	5.18922e-08	1.20467e-07	2.7125e-07	1.33805e-07	1.01422	0.97869	0	0	0	0	-0.985975	-1.02177	0	0	0	0
comp10148_c0_seq1	comp10148_c0_seq1 len=257 path=[0:0-256]	6.62194e-06	6.27881e-06	6.80736e-06	4.76743e-06	6.84727e-06	7.19497e-06	6.11413e-06	5.91353e-06	5.29301e-06	5.78242e-06	6.10312e-06	5.82053e-06	0.923314	0.941823	0.777542	1.2129	0.891321	0.808973	-1.08306	-1.06177	-1.2861	-0.824469	-1.12193	-1.23614
comp45_c1_seq1	comp45_c1_seq1 len=236 path=[382:0-235]	1.29286e-05	1.32282e-05	1.43711e-05	1.20027e-05	1.2268e-05	1.47195e-05	6.84783e-06	9.22229e-06	7.9914e-06	1.13239e-05	9.83281e-06	9.36637e-06	0.529667	0.69717	0.556075	0.943446	0.801498	0.636325	-1.88798	-1.43437	-1.79832	-1.05994	-1.24766	-1.57152
comp13876_c0_seq1	comp13876_c0_seq1 len=191 path=[0:0-190]	1.02482e-06	1.09727e-06	1.70184e-06	3.19698e-06	2.79597e-06	1.97724e-06	1.63043e-06	1.40798e-06	2.17947e-06	1.92747e-06	1.42406e-06	2.07398e-06	1.59094	1.28317	1.28066	0.602904	0.509326	1.04893	-0.628559	-0.779319	-0.780849	-1.65864	-1.96338	-0.953356
comp32151_c0_seq1	comp32151_c0_seq1 len=193 path=[0:0-192] : tr|F2DLF7|F2DLF7_HORVD Non-specific lipid-transfer protein OS=Hordeum vulgare var. distichum PE=2 SV=1 e-value: 3e-04 blast score: 44.7	3.94163e-07	6.09593e-08	1.89093e-07	7.85224e-07	6.27667e-07	5.49234e-08	8.96739e-07	5.63193e-07	1.55677e-06	3.61401e-07	6.10312e-07	1.80637e-06	2.27504	9.23884	8.2328	0.460253	0.972351	32.8889	-0.439552	-0.108239	-0.121465	-2.17272	-1.02844	-0.0304054
CJ622797	CJ622797 weakly similar to UniRef100_Q0DBD7 Cluster: Os06g0573700 protein; n=1; Oryza sativa Japonica Group|Rep: Os06g0573700 protein - Oryza sativa subsp. japonica (Rice), partial (14%)	2.36498e-07	1.21919e-07	0	0	0	0	8.15217e-08	0	1.55677e-07	0	1.35625e-07	0	0.344704	0	0	0	0	0	-2.90104	0	0	0	0	0
TC377467	TC377467 similar to UniRef100_A7P9P9 Cluster: Chromosome chr3 scaffold_8, whole genome shotgun sequence; n=1; Vitis vinifera|Rep: Chromosome chr3 scaffold_8, whole genome shotgun sequence - Vitis vinifera (Grape), partial (61%)	2.36498e-07	6.09593e-07	7.56373e-07	5.04787e-07	6.84727e-07	3.2954e-07	4.8913e-07	4.92794e-07	7.26491e-07	4.81868e-07	1.35625e-07	6.02124e-07	2.06822	0.808398	0.960493	0.954598	0.198071	1.82716	-0.483507	-1.23701	-1.04113	-1.04756	-5.04868	-0.547297
comp9945_c0_seq4	comp9945_c0_seq4 len=155 path=[938:0-22 526:23-23 269:24-26 272:27-38 284:39-64 400:65-69 315:70-154] : tr|Q75XV6|Q75XV6_HORVU BARE-1 retrotransposon protease (Fragment) OS=Hordeum vulgare GN=BRP PE=4 SV=1 e-value: 4e-17 blast score: 87.8	4.72996e-07	3.04797e-07	9.45466e-07	9.53486e-07	1.02709e-06	6.59081e-07	7.33696e-07	7.03992e-07	2.59461e-07	3.61401e-07	3.39062e-07	7.35929e-07	1.55117	2.30971	0.274427	0.379032	0.330119	1.1166	-0.644676	-0.432955	-3.64396	-2.6383	-3.02921	-0.895577
TC397015	TC397015 similar to UniRef100_Q9ZRI7 Cluster: Elongation factor 1-gamma 1; n=2; Oryza sativa Japonica Group|Rep: Elongation factor 1-gamma 1 - Oryza sativa subsp. japonica (Rice), partial (43%)	6.62194e-06	7.25416e-06	8.3201e-06	9.70312e-06	8.73027e-06	9.6116e-06	1.05978e-05	8.6591e-06	8.40654e-06	8.67363e-06	7.18812e-06	9.63398e-06	1.60041	1.19367	1.01039	0.893901	0.823356	1.00233	-0.62484	-0.83775	-0.989718	-1.11869	-1.21454	-0.997676
comp32620_c0_seq1	comp32620_c0_seq1 len=234 path=[0:0-233]	2.36498e-07	1.82878e-07	3.78187e-07	1.12175e-07	2.28242e-07	1.09847e-07	8.15217e-08	1.40798e-07	2.07569e-07	1.20467e-07	4.06875e-07	2.67611e-07	0.344704	0.769903	0.548853	1.07392	1.78264	2.43622	-2.90104	-1.29886	-1.82198	-0.931165	-0.560965	-0.410473
comp2061_c0_seq1	comp2061_c0_seq1 len=363 path=[0:0-362]	2.29403e-05	2.02995e-05	2.53385e-05	3.16333e-05	3.54917e-05	2.62534e-05	2.83696e-05	2.75261e-05	3.06164e-05	1.98771e-05	2.7125e-05	3.55253e-05	1.23667	1.356	1.2083	0.628359	0.764263	1.35317	-0.808624	-0.737463	-0.827612	-1.59145	-1.30845	-0.739005
comp17247_c0_seq1	comp17247_c0_seq1 len=312 path=[0:0-311] : tr|Q307Z7|Q307Z7_SOLTU Acidic ribosomal protein P1a-like OS=Solanum tuberosum PE=4 SV=1 e-value: 6e-11 blast score: 67.0	8.67159e-07	1.09727e-06	0	0	0	0	1.22283e-06	1.26718e-06	0	0	0	0	1.41015	1.15485	0	0	0	0	-0.709144	-0.86591	0	0	0	0
comp35480_c0_seq1	comp35480_c0_seq1 len=164 path=[0:0-163] : tr|B2ZGL6|B2ZGL6_WHEAT Putative amino acid permease OS=Triticum aestivum PE=4 SV=1 e-value: 1e-15 blast score: 82.8	3.15331e-07	0	1.89093e-07	1.12175e-07	7.41788e-07	3.2954e-07	1.63043e-07	2.11197e-07	0	1.20467e-07	0	6.69027e-08	0.517056	0	0	1.07392	0	0.203018	-1.93403	0	0	-0.931165	0	-4.92567
comp25894_c0_seq1	comp25894_c0_seq1 len=148 path=[0:0-147]	1.57665e-07	3.04797e-07	0	0	5.70606e-08	1.09847e-07	8.15217e-08	7.03992e-08	5.18922e-08	0	0	0	0.517056	0.230971	0	0	0	0	-1.93403	-4.32955	0	0	0	0
TC246808	TC246808 weakly similar to UniRef100_A7P0F4 Cluster: Chromosome chr19 scaffold_4, whole genome shotgun sequence; n=1; Vitis vinifera|Rep: Chromosome chr19 scaffold_4, whole genome shotgun sequence - Vitis vinifera (Grape), partial (10%)	0	1.82878e-07	0	1.68262e-07	1.71182e-07	1.09847e-07	1.63043e-07	2.11197e-07	2.59461e-07	2.40934e-07	2.03437e-07	2.67611e-07	0	1.15485	0	1.4319	1.18843	2.43622	0	-0.86591	0	-0.698374	-0.841447	-0.410473
comp13705_c0_seq1	comp13705_c0_seq1 len=148 path=[84:0-56 16:57-147]	0	6.09593e-08	0	2.2435e-07	0	1.6477e-07	2.44565e-07	7.03992e-08	1.03784e-07	0	2.7125e-07	2.67611e-07	0	1.15485	0	0	0	1.62414	0	-0.86591	0	0	0	-0.615709
comp6039_c0_seq1	comp6039_c0_seq1 len=358 path=[0:0-357] : tr|B9FRT6|B9FRT6_ORYSJ Putative uncharacterized protein OS=Oryza sativa subsp. japonica GN=OsJ_20318 PE=3 SV=1 e-value: 2e-20 blast score: 98.6	5.99128e-06	5.97401e-06	6.24008e-06	6.11353e-06	7.58906e-06	6.37112e-06	4.97283e-06	5.84313e-06	7.21302e-06	4.81868e-06	7.18812e-06	6.69027e-06	0.83001	0.978091	1.15592	0.7882	0.947169	1.05009	-1.2048	-1.0224	-0.865113	-1.26871	-1.05578	-0.952296
BJ273272	BJ273272 similar to UniRef100_Q0D3T3 Cluster: Os07g0668000 protein; n=1; Oryza sativa Japonica Group|Rep: Os07g0668000 protein - Oryza sativa subsp. japonica (Rice), partial (21%)	8.67159e-07	1.03631e-06	1.70184e-06	1.45827e-06	1.48358e-06	1.04354e-06	7.33696e-07	1.12639e-06	8.30275e-07	4.81868e-07	1.22062e-06	9.36637e-07	0.846091	1.08692	0.48787	0.330438	0.822758	0.897553	-1.18191	-0.920029	-2.04973	-3.02629	-1.21542	-1.11414
comp8474_c0_seq1	comp8474_c0_seq1 len=456 path=[0:0-455] : tr|F2E3N2|F2E3N2_HORVD Predicted protein OS=Hordeum vulgare var. distichum PE=2 SV=1 e-value: 2e-13 blast score: 75.5	3.70513e-06	4.08428e-06	3.59277e-06	7.23527e-06	5.24958e-06	5.27265e-06	6.68478e-06	5.35034e-06	5.65625e-06	4.33682e-06	4.67906e-06	8.29593e-06	1.80419	1.30998	1.57434	0.599399	0.891321	1.57339	-0.554264	-0.763368	-0.635186	-1.66834	-1.12193	-0.63557
TC375438	TC375438 homologue to UniRef100_A2X2W0 Cluster: Phosphoenolpyruvate carboxylase; n=1; Oryza sativa Indica Group|Rep: Phosphoenolpyruvate carboxylase - Oryza sativa subsp. indica (Rice), partial (22%)	5.28179e-06	6.21785e-06	9.07648e-06	8.97398e-06	7.2467e-06	7.19497e-06	1.14946e-05	9.57429e-06	9.18492e-06	8.67363e-06	5.15375e-06	8.09522e-06	2.17626	1.53981	1.01195	0.966531	0.711186	1.12512	-0.459503	-0.649432	-0.988193	-1.03463	-1.4061	-0.888792
comp28688_c0_seq1	comp28688_c0_seq1 len=260 path=[0:0-259]	2.36498e-07	3.65756e-07	3.78187e-07	2.2435e-07	2.28242e-07	4.94311e-07	3.26087e-07	3.51996e-07	2.59461e-07	1.20467e-07	2.7125e-07	6.02124e-07	1.37882	0.962379	0.686067	0.536962	1.18843	1.21811	-0.72526	-1.03909	-1.45758	-1.86233	-0.841447	-0.820945
CV770266	CV770266	0	0	0	5.60874e-08	0	0	0	0	1.03784e-07	1.20467e-07	1.35625e-07	1.33805e-07	0	0	0	2.14785	0	0	0	0	0	-0.465583	0	0
comp28891_c0_seq1	comp28891_c0_seq1 len=253 path=[0:0-252]	1.18249e-06	4.87675e-07	5.6728e-07	1.7948e-06	1.42652e-06	1.6477e-06	1.79348e-06	1.40798e-06	1.24541e-06	9.63737e-07	1.15281e-06	1.00354e-06	1.5167	2.88714	2.19541	0.536962	0.808131	0.609054	-0.659328	-0.346364	-0.455495	-1.86233	-1.23742	-1.64189
TC438061	TC438061	4.88762e-06	5.36442e-06	3.97096e-06	6.33788e-06	5.47782e-06	6.48096e-06	5.54348e-06	6.61752e-06	5.96761e-06	5.54149e-06	4.54343e-06	6.75717e-06	1.13419	1.23359	1.50281	0.874344	0.829424	1.04262	-0.881689	-0.810639	-0.665419	-1.14371	-1.20566	-0.959124
comp4717_c0_seq1	comp4717_c0_seq1 len=372 path=[0:0-371]	1.40322e-05	1.42035e-05	1.66402e-05	2.11449e-05	1.76317e-05	1.94978e-05	1.1413e-05	1.12639e-05	1.29212e-05	9.63737e-06	9.08687e-06	1.25108e-05	0.813346	0.793033	0.776503	0.455776	0.51537	0.641651	-1.22949	-1.26098	-1.28783	-2.19406	-1.94035	-1.55848
CX632932	CX632932 similar to UniRef100_Q67UP1 Cluster: Hydroxyproline-rich glycoprotein-like; n=1; Oryza sativa Japonica Group|Rep: Hydroxyproline-rich glycoprotein-like - Oryza sativa subsp. japonica (Rice), partial (7%)	7.88327e-07	1.03631e-06	5.10552e-06	2.91654e-06	1.94006e-06	2.19694e-06	3.50543e-06	3.37916e-06	1.81623e-06	3.37308e-06	1.76312e-06	2.14088e-06	4.44668	3.26077	0.355738	1.15653	0.908798	0.974487	-0.224887	-0.306676	-2.81106	-0.864654	-1.10035	-1.02618
TC241548	TC241548 homologue to UniRef100_Q0DK90 Cluster: Ubiquitin carrier protein; n=1; Oryza sativa Japonica Group|Rep: Ubiquitin carrier protein - Oryza sativa subsp. japonica (Rice), complete #or# TC261615 homologue to UniRef100_Q0DK90 Cluster: Ubiquitin carrier protein; n=1; Oryza sativa Japonica Group|Rep: Ubiquitin carrier protein - Oryza sativa subsp. japonica (Rice), partial (82%)	0	6.09593e-08	1.89093e-07	5.60874e-08	0	0	0	2.81597e-07	0	2.40934e-07	1.35625e-07	0	0	4.61942	0	4.29569	0	0	0	-0.216477	0	-0.232791	0	0
comp41562_c0_seq1	comp41562_c0_seq1 len=179 path=[0:0-178]	7.88327e-08	1.21919e-07	0	0	0	0	8.15217e-08	2.11197e-07	0	0	0	0	1.03411	1.73228	0	0	0	0	-0.967014	-0.577273	0	0	0	0
comp11050_c0_seq1	comp11050_c0_seq1 len=391 path=[3:0-390]	2.60148e-06	3.23084e-06	3.02549e-06	3.25307e-06	3.30952e-06	3.02079e-06	2.85326e-06	2.04158e-06	3.21732e-06	3.13214e-06	2.44125e-06	2.6092e-06	1.09678	0.631902	1.0634	0.962828	0.737645	0.863749	-0.911756	-1.58253	-0.940377	-1.03861	-1.35567	-1.15774
comp484_c0_seq1	comp484_c0_seq1 len=488 path=[0:0-487] : tr|F2CUT8|F2CUT8_HORVD Predicted protein OS=Hordeum vulgare var. distichum PE=4 SV=1 e-value: 4e-24 blast score: 111	0.000172959	0.000220551	8.26338e-05	8.82255e-05	0.000112409	0.000149447	0.000182935	0.000176772	8.38059e-05	4.84278e-05	0.000193808	0.000147587	1.05768	0.801503	1.01419	0.548909	1.72413	0.987558	-0.945467	-1.24766	-0.986013	-1.82179	-0.580004	-1.0126
comp13745_c0_seq1	comp13745_c0_seq1 len=196 path=[0:0-195]	7.09494e-07	6.09593e-07	5.6728e-07	1.06566e-06	2.85303e-07	4.94311e-07	9.78261e-07	7.74391e-07	3.63246e-07	8.4327e-07	4.06875e-07	2.67611e-07	1.37882	1.27034	0.640329	0.791312	1.42611	0.541381	-0.72526	-0.787191	-1.5617	-1.26372	-0.701206	-1.84713
TC393595	TC393595 similar to UniRef100_Q66T88 Cluster: Rhodanese-like protein; n=1; Holcus lanatus|Rep: Rhodanese-like protein - Holcus lanatus (Velvet grass), partial (96%)	1.49782e-06	1.15823e-06	2.08003e-06	9.53486e-07	6.84727e-07	1.59278e-06	4.56522e-06	7.53271e-06	9.70384e-06	6.02335e-06	6.64562e-06	6.08814e-06	3.04791	6.50365	4.66525	6.31719	9.7055	3.82234	-0.328094	-0.15376	-0.214351	-0.158298	-0.103034	-0.26162
comp10192_c0_seq1	comp10192_c0_seq1 len=350 path=[0:0-349] : tr|F2DXI4|F2DXI4_HORVD Predicted protein OS=Hordeum vulgare var. distichum PE=2 SV=1 e-value: 6e-15 blast score: 80.5	2.28615e-06	3.5966e-06	1.89093e-07	0	1.14121e-07	4.4488e-06	7.33696e-07	1.12639e-06	2.0238e-06	3.61401e-07	6.44218e-06	3.88035e-06	0.320931	0.313181	10.7026	0	56.4503	0.872226	-3.11593	-3.19304	-0.0934349	0	-0.0177147	-1.14649
TC243062	TC243062 weakly similar to UniRef100_O82587 Cluster: MTN3 homolog; n=1; Arabidopsis thaliana|Rep: MTN3 homolog - Arabidopsis thaliana (Mouse-ear cress), partial (55%)	1.57665e-07	6.09593e-08	0	5.60874e-08	1.14121e-07	0	0	0	5.18922e-08	0	2.03437e-07	0	0	0	0	0	1.78264	0	0	0	0	0	-0.560965	0
comp8968_c0_seq1	comp8968_c0_seq1 len=336 path=[0:0-335] : tr|F2DW86|F2DW86_HORVD Predicted protein OS=Hordeum vulgare var. distichum PE=2 SV=1 e-value: 6e-07 blast score: 53.9	1.81315e-05	1.61542e-05	1.79639e-05	2.40054e-05	2.5392e-05	2.05963e-05	2.4538e-05	2.16125e-05	3.21213e-05	2.3732e-05	1.91231e-05	2.63596e-05	1.35334	1.33789	1.78811	0.988611	0.753116	1.27983	-0.738914	-0.747447	-0.559251	-1.01152	-1.32782	-0.781356
comp3175_c0_seq1	comp3175_c0_seq1 len=295 path=[0:0-294]	1.22979e-05	1.2009e-05	2.06112e-05	2.30519e-05	2.04848e-05	1.80698e-05	1.82609e-05	1.55582e-05	1.53082e-05	1.66245e-05	1.06466e-05	1.47855e-05	1.48488	1.29555	0.742714	0.721175	0.519731	0.818243	-0.673456	-0.771874	-1.34641	-1.38663	-1.92407	-1.22213
DY275879	DY275879 homologue to UniRef100_Q9XGS6 Cluster: Cytosolic class II low molecular weight heat shock protein; n=1; Prunus dulcis|Rep: Cytosolic class II low molecular weight heat shock protein - Prunus dulcis (Almond) (Prunus amygdalus), partial (90%) #or# EY714901 homologue to UniRef100_Q9XGS6 Cluster: Cytosolic class II low molecular weight heat shock protein; n=1; Prunus dulcis|Rep: Cytosolic cl…	4.80879e-06	4.81579e-06	0	0	0	0	6.11413e-06	4.71674e-06	0	0	1.35625e-07	3.34513e-07	1.27145	0.979434	0	0	0	0	-0.786505	-1.021	0	0	0	0
TC266167	TC266167 similar to UniRef100_A0FHB5 Cluster: Type III chlorophyll a/b-binding protein; n=1; Lycoris aurea|Rep: Type III chlorophyll a/b-binding protein - Lycoris aurea (Golden hurricane lily) (Golden spiderlily), partial (64%) #or# TC270036 similar to UniRef100_A0FHB5 Cluster: Type III chlorophyll a/b-binding protein; n=1; Lycoris aurea|Rep: Type III chlorophyll a/b-binding protein - Lycoris aur…	7.88327e-08	0	0	0	0	0	8.15217e-08	0	0	0	0	0	1.03411	0	0	0	0	0	-0.967014	0	0	0	0	0
comp18994_c0_seq1	comp18994_c0_seq1 len=209 path=[0:0-208]	8.67159e-07	1.28015e-06	1.51275e-06	6.73049e-07	1.02709e-06	9.88621e-07	6.52174e-07	9.85588e-07	1.60866e-06	8.4327e-07	8.81562e-07	1.07044e-06	0.752081	0.769903	1.0634	1.25291	0.858309	1.08276	-1.32964	-1.29886	-0.940377	-0.798142	-1.16508	-0.923563
comp15339_c0_seq1	comp15339_c0_seq1 len=319 path=[0:0-318] : tr|F2EK99|F2EK99_HORVD Predicted protein OS=Hordeum vulgare var. distichum PE=2 SV=1 e-value: 2e-11 blast score: 68.6	1.41899e-06	1.9507e-06	2.26912e-06	2.74828e-06	2.56773e-06	2.19694e-06	2.6087e-06	2.32317e-06	3.06164e-06	1.92747e-06	2.57687e-06	2.5423e-06	1.83842	1.19094	1.34926	0.701338	1.00356	1.1572	-0.543945	-0.83967	-0.741145	-1.42585	-0.996451	-0.864153
comp16631_c0_seq1	comp16631_c0_seq1 len=234 path=[0:0-233]	1.10366e-06	9.75349e-07	1.89093e-06	9.53486e-07	6.84727e-07	8.78775e-07	1.1413e-06	1.19679e-06	6.22707e-07	1.0842e-06	1.15281e-06	1.94018e-06	1.03411	1.22703	0.329312	1.1371	1.68361	2.20782	-0.967014	-0.814974	-3.03663	-0.879434	-0.593963	-0.452935
comp14038_c0_seq1	comp14038_c0_seq1 len=159 path=[0:0-158]	9.45992e-07	9.75349e-07	1.89093e-07	1.23392e-06	7.41788e-07	1.20831e-06	6.52174e-07	8.4479e-07	2.07569e-06	3.61401e-07	4.74687e-07	1.00354e-06	0.689408	0.866141	10.9771	0.292888	0.639923	0.830528	-1.45052	-1.15455	-0.091099	-3.41427	-1.56269	-1.20405
CK194423	CK194423 similar to UniRef100_A2Q200 Cluster: PSP, proline-rich; n=1; Medicago truncatula|Rep: PSP, proline-rich - Medicago truncatula (Barrel medic), partial (13%)	1.02482e-05	1.08508e-05	1.4182e-05	1.64336e-05	1.63193e-05	1.3621e-05	1.54891e-05	1.20383e-05	1.3492e-05	1.31309e-05	1.05109e-05	1.35143e-05	1.51139	1.10944	0.951346	0.799028	0.644078	0.992169	-0.661641	-0.901357	-1.05114	-1.25152	-1.55261	-1.00789
comp9013_c0_seq2	comp9013_c0_seq2 len=333 path=[0:0-288 289:289-309 498:310-332]	0	0	1.89093e-07	0	0	5.49234e-08	0	7.03992e-08	5.18922e-08	0	0	0	0	0	0.274427	0	0	0	0	0	-3.64396	0	0	0
CA696359	CA696359	6.30661e-07	5.48634e-07	9.45466e-07	1.57045e-06	6.27667e-07	1.09847e-06	4.07609e-07	7.74391e-07	6.22707e-07	8.4327e-07	4.74687e-07	2.00708e-06	0.64632	1.41149	0.658624	0.536962	0.756273	1.82716	-1.54722	-0.708472	-1.51832	-1.86233	-1.32227	-0.547297
comp4341_c0_seq2	comp4341_c0_seq2 len=452 path=[843:0-132 1065:133-389 639:390-451]	1.57665e-07	1.82878e-07	0	2.80437e-07	3.42364e-07	3.84464e-07	1.63043e-07	2.81597e-07	5.18922e-08	2.40934e-07	6.78124e-08	2.67611e-07	1.03411	1.53981	0	0.859138	0.198071	0.696062	-0.967014	-0.649432	0	-1.16396	-5.04868	-1.43665
comp17837_c0_seq1	comp17837_c0_seq1 len=292 path=[0:0-291]	8.27743e-06	8.8391e-06	1.0211e-05	1.16662e-05	9.47206e-06	1.17536e-05	1.15761e-05	8.94069e-06	1.12606e-05	9.1555e-06	8.88343e-06	1.0972e-05	1.39851	1.01149	1.10279	0.78479	0.937856	0.933503	-0.715045	-0.988637	-0.906792	-1.27423	-1.06626	-1.07123
comp1589_c0_seq1	comp1589_c0_seq1 len=467 path=[0:0-466] : tr|F2E253|F2E253_HORVD Predicted protein OS=Hordeum vulgare var. distichum PE=2 SV=1 e-value: 1e-22 blast score: 105	3.79973e-05	4.66339e-05	2.28803e-05	2.35006e-05	2.2596e-05	3.4437e-05	2.625e-05	2.999e-05	3.89192e-05	2.16841e-05	4.1569e-05	3.82014e-05	0.690838	0.643095	1.70099	0.922702	1.83966	1.10931	-1.44752	-1.55498	-0.587892	-1.08377	-0.543578	-0.901458
CA635158	CA635158 similar to UniRef100_Q8VY52 Cluster: PsbP-related thylakoid lumenal protein 3, chloroplast precursor; n=1; Arabidopsis thaliana|Rep: PsbP-related thylakoid lumenal protein 3, chloroplast precursor - Arabidopsis thaliana (Mouse-ear cress), partial (26%)	1.00117e-05	1.29843e-05	4.16005e-06	4.20655e-06	5.42076e-06	1.16987e-05	6.60326e-06	7.9551e-06	8.92546e-06	7.83036e-06	1.32234e-05	9.70088e-06	0.659551	0.612669	2.14552	1.86147	2.43941	0.829229	-1.51618	-1.6322	-0.466088	-0.537211	-0.409936	-1.20594
TC248269	TC248269	0	0	0	0	0	1.09847e-07	0	1.40798e-07	5.18922e-08	0	0	1.33805e-07	0	0	0	0	0	1.21811	0	0	0	0	0	-0.820945
TC253255	TC253255 #or# TC265299 homologue to UniRef100_A8DWQ2 Cluster: Predicted protein; n=1; Nematostella vectensis|Rep: Predicted protein - Nematostella vectensis (Starlet sea anemone), partial (86%) #or# TC275717 similar to UniRef100_A7T0Z1 Cluster: Predicted protein; n=1; Nematostella vectensis|Rep: Predicted protein - Nematostella vectensis (Starlet sea anemone), partial (96%) #or# TC280289 UniRef10…	0	0	0	0	5.70606e-08	1.09847e-07	0	0	5.18922e-08	0	0	6.69027e-08	0	0	0	0	0	0.609054	0	0	0	0	0	-1.64189
comp18359_c0_seq1	comp18359_c0_seq1 len=360 path=[0:0-359]	1.18249e-06	1.21919e-06	0	8.41311e-07	7.41788e-07	1.37309e-06	1.46739e-06	1.33758e-06	1.24541e-06	1.0842e-06	4.74687e-07	1.40496e-06	1.24093	1.09711	0	1.28871	0.639923	1.02321	-0.805845	-0.911484	0	-0.775971	-1.56269	-0.977316
comp2086_c0_seq1	comp2086_c0_seq1 len=630 path=[0:0-629] : tr|F2D178|F2D178_HORVD Methionine aminopeptidase OS=Hordeum vulgare var. distichum PE=2 SV=1 e-value: 2e-23 blast score: 109	4.57229e-05	5.25469e-05	2.51494e-05	2.89411e-05	3.60052e-05	4.04786e-05	3.64402e-05	4.09723e-05	3.80889e-05	3.40922e-05	4.76722e-05	3.91381e-05	0.796979	0.779728	1.5145	1.17799	1.32403	0.966884	-1.25474	-1.2825	-0.660282	-0.848907	-0.755268	-1.03425
comp3613_c0_seq1	comp3613_c0_seq1 len=454 path=[0:0-453] : tr|F2D5M0|F2D5M0_HORVD Predicted protein OS=Hordeum vulgare var. distichum PE=2 SV=1 e-value: 4e-04 blast score: 44.7	0.000144027	0.00014618	0.000173777	0.000197315	0.000178999	0.000150161	0.000223696	0.000188951	0.00019444	0.000145163	0.000155358	0.000186591	1.55315	1.29259	1.11891	0.735689	0.867928	1.24261	-0.643854	-0.773641	-0.893729	-1.35927	-1.15217	-0.804756
TC371502	TC371502 similar to UniRef100_A7Q2A4 Cluster: Chromosome chr13 scaffold_45, whole genome shotgun sequence; n=1; Vitis vinifera|Rep: Chromosome chr13 scaffold_45, whole genome shotgun sequence - Vitis vinifera (Grape), partial (87%)	8.67159e-07	9.1439e-07	2.26912e-06	2.07523e-06	2.39655e-06	3.84464e-07	8.96739e-07	9.85588e-07	1.9719e-06	7.22803e-07	1.42406e-06	1.73947e-06	1.03411	1.07786	0.869018	0.348299	0.594214	4.5244	-0.967014	-0.927761	-1.15072	-2.87109	-1.68289	-0.221024
TC252559	TC252559 UniRef100_Q9LKC7 Cluster: Chlorophyll a/b-binding protein precursor; n=2; Hordeum vulgare|Rep: Chlorophyll a/b-binding protein precursor - Hordeum vulgare (Barley), partial (68%)	0	6.09593e-08	1.89093e-07	0	0	5.49234e-08	0	7.03992e-08	0	0	0	0	0	1.15485	0	0	0	0	0	-0.86591	0	0	0	0
comp16191_c0_seq1	comp16191_c0_seq1 len=304 path=[2:0-303] : tr|F2CWZ6|F2CWZ6_HORVD Predicted protein OS=Hordeum vulgare var. distichum PE=2 SV=1 e-value: 4e-07 blast score: 54.3	1.49782e-06	1.58494e-06	0	0	5.70606e-08	8.23851e-07	8.15217e-08	0	0	0	0	6.69027e-08	0.0544269	0	0	0	0	0.0812072	-18.3733	0	0	0	0	-12.3142
TC258084	TC258084 homologue to UniRef100_Q0IUE3 Cluster: Os11g0162200 protein; n=1; Oryza sativa Japonica Group|Rep: Os11g0162200 protein - Oryza sativa subsp. japonica (Rice), complete	5.99128e-05	5.27298e-05	3.00658e-05	5.28343e-05	4.52491e-05	5.88779e-05	5.20109e-05	4.05499e-05	4.68068e-05	3.92723e-05	4.04162e-05	4.73002e-05	0.868109	0.769013	1.55681	0.74331	0.893195	0.80336	-1.15193	-1.30037	-0.642339	-1.34533	-1.11958	-1.24477
comp11524_c0_seq1	comp11524_c0_seq1 len=660 path=[5:0-659]	1.15884e-05	1.00583e-05	1.72075e-05	1.83406e-05	1.44363e-05	1.74656e-05	2.24185e-05	1.57694e-05	1.54639e-05	1.36128e-05	1.4105e-05	1.75285e-05	1.93456	1.5678	0.898672	0.742222	0.977048	1.0036	-0.516913	-0.637835	-1.11275	-1.34731	-1.02349	-0.996414
BF066097	BF066097 similar to UniRef100_Q0D5P8 Cluster: Os07g0544800 protein; n=3; Oryza sativa|Rep: Os07g0544800 protein - Oryza sativa subsp. japonica (Rice), partial (74%) #or# TC256041 similar to UniRef100_Q0D5P8 Cluster: Os07g0544800 protein; n=3; Oryza sativa|Rep: Os07g0544800 protein - Oryza sativa subsp. japonica (Rice), partial (83%) #or# TC268476 similar to UniRef100_Q0D5P8 Cluster: Os07g0544800 …	0.000402283	0.000394529	0.000382157	0.000324241	0.00038573	0.00034047	0.000328533	0.000361781	0.000337144	0.000361763	0.000322855	0.000343144	0.81667	0.916996	0.882212	1.11572	0.836998	1.00785	-1.22448	-1.09052	-1.13351	-0.896282	-1.19475	-0.992209
TC370566	TC370566 similar to UniRef100_A7QYT9 Cluster: Chromosome undetermined scaffold_254, whole genome shotgun sequence; n=1; Vitis vinifera|Rep: Chromosome undetermined scaffold_254, whole genome shotgun sequence - Vitis vinifera (Grape), partial (55%) #or# TC423685	8.67159e-07	5.48634e-07	3.78187e-07	6.16961e-07	6.27667e-07	3.84464e-07	8.96739e-07	4.92794e-07	8.30275e-07	9.63737e-07	7.45937e-07	2.67611e-07	1.03411	0.89822	2.19541	1.56207	1.18843	0.696062	-0.967014	-1.11331	-0.455495	-0.640176	-0.841447	-1.43665
comp10034_c0_seq1	comp10034_c0_seq1 len=482 path=[0:0-481] : tr|A3BNF3|A3BNF3_ORYSJ Putative uncharacterized protein OS=Oryza sativa subsp. japonica GN=OsJ_25584 PE=4 SV=1 e-value: 6e-12 blast score: 70.9	7.88327e-06	8.29047e-06	4.91642e-06	8.07658e-06	6.84727e-06	9.6116e-06	5.54348e-06	7.03992e-06	9.60006e-06	9.5169e-06	9.22249e-06	1.14404e-05	0.703196	0.849158	1.95265	1.17833	1.34689	1.19027	-1.42208	-1.17764	-0.512124	-0.848657	-0.742454	-0.840149
comp30045_c0_seq1	comp30045_c0_seq1 len=121 path=[0:0-120]	3.94163e-07	1.82878e-07	0	5.60874e-08	5.70606e-08	1.6477e-07	2.44565e-07	5.63193e-07	2.59461e-07	2.40934e-07	0	4.68319e-07	0.620467	3.07961	0	4.29569	0	2.84225	-1.61169	-0.324716	0	-0.232791	0	-0.351834
comp24365_c0_seq1	comp24365_c0_seq1 len=228 path=[0:0-227] : tr|B9HQ41|B9HQ41_POPTR Predicted protein OS=Populus trichocarpa GN=POPTRDRAFT_648978 PE=4 SV=1 e-value: 7e-07 blast score: 53.5	5.51829e-07	3.04797e-07	0	0	0	0	0	1.40798e-07	0	0	0	0	0	0.461942	0	0	0	0	0	-2.16477	0	0	0	0
comp21132_c0_seq1	comp21132_c0_seq1 len=329 path=[0:0-328] : tr|F2EGR1|F2EGR1_HORVD Predicted protein OS=Hordeum vulgare var. distichum PE=2 SV=1 e-value: 3e-18 blast score: 91.3	5.51829e-07	4.87675e-07	1.89093e-07	5.60874e-07	5.70606e-07	4.39387e-07	8.15217e-07	1.26718e-06	6.22707e-07	6.02335e-07	1.085e-06	4.01416e-07	1.4773	2.59842	3.29312	1.07392	1.90149	0.913581	-0.67691	-0.384849	-0.303663	-0.931165	-0.525905	-1.09459
comp36099_c0_seq1	comp36099_c0_seq1 len=194 path=[0:0-193]	1.57665e-07	6.09593e-08	0	5.60874e-08	1.71182e-07	1.6477e-07	0	7.03992e-08	5.18922e-08	1.20467e-07	0	0	0	1.15485	0	2.14785	0	0	0	-0.86591	0	-0.465583	0	0
comp482_c0_seq1	comp482_c0_seq1 len=668 path=[0:0-183 184:184-191 192:192-667] : tr|F2CQ99|F2CQ99_HORVD Predicted protein OS=Hordeum vulgare var. distichum PE=2 SV=1 e-value: 7e-42 blast score: 171	0.000222781	0.000258102	0.000244308	0.000298721	0.000319596	0.000236775	0.000280109	0.000309475	0.000248408	0.000240693	0.000299324	0.000300125	1.25733	1.19904	1.01678	0.805745	0.936569	1.26756	-0.795338	-0.834	-0.983497	-1.24109	-1.06773	-0.78892
CJ895836	CJ895836 similar to UniRef100_P93611 Cluster: Cold acclimation protein WCOR518; n=1; Triticum aestivum|Rep: Cold acclimation protein WCOR518 - Triticum aestivum (Wheat), partial (54%)	1.57665e-07	6.09593e-08	0	0	5.70606e-08	0	0	7.03992e-08	0	0	6.78124e-08	0	0	1.15485	0	0	1.18843	0	0	-0.86591	0	0	-0.841447	0
comp7774_c0_seq1	comp7774_c0_seq1 len=427 path=[0:0-426] : tr|F2D3M1|F2D3M1_HORVD Predicted protein OS=Hordeum vulgare var. distichum PE=2 SV=1 e-value: 5e-09 blast score: 60.8	6.70078e-06	3.47468e-06	0.000101165	0.000111165	8.67321e-05	1.9333e-05	6.27717e-05	5.04058e-05	4.07873e-05	3.52969e-05	1.28844e-05	3.85359e-05	9.36783	14.5066	0.403176	0.317517	0.148554	1.99327	-0.106748	-0.0689342	-2.4803	-3.14944	-6.73158	-0.501689
comp10081_c0_seq1	comp10081_c0_seq1 len=483 path=[0:0-482]	1.5057e-05	1.4935e-05	3.23349e-05	3.61764e-05	2.88156e-05	2.08709e-05	2.16848e-05	1.8515e-05	1.89926e-05	1.92747e-05	1.45797e-05	1.70602e-05	1.44018	1.2397	0.587369	0.532799	0.505965	0.817415	-0.69436	-0.806646	-1.70251	-1.87688	-1.97642	-1.22337
TC423264	TC423264 similar to UniRef100_Q07A01 Cluster: Digalactosyldiacylglycerol synthase 1; n=1; Vigna unguiculata|Rep: Digalactosyldiacylglycerol synthase 1 - Vigna unguiculata (Cowpea), partial (22%) #or# TC437657 similar to UniRef100_Q07A01 Cluster: Digalactosyldiacylglycerol synthase 1; n=1; Vigna unguiculata|Rep: Digalactosyldiacylglycerol synthase 1 - Vigna unguiculata (Cowpea), partial (31%) #or#…	7.4891e-06	9.20486e-06	1.07783e-05	1.46388e-05	1.53493e-05	9.3919e-06	8.39674e-06	7.88471e-06	1.56196e-05	1.33718e-05	1.20706e-05	1.19087e-05	1.12119	0.856581	1.44917	0.913452	0.786395	1.26797	-0.891906	-1.16743	-0.690053	-1.09475	-1.27163	-0.788661
comp25393_c0_seq1	comp25393_c0_seq1 len=381 path=[0:0-380]	3.15331e-07	4.87675e-07	7.56373e-07	2.2435e-07	4.56485e-07	2.74617e-07	0	1.40798e-07	1.55677e-07	1.20467e-07	2.03437e-07	2.00708e-07	0	0.288714	0.20582	0.536962	0.445661	0.730865	0	-3.46364	-4.85862	-1.86233	-2.24386	-1.36824
TC389882	TC389882 homologue to UniRef100_Q5GMM4 Cluster: 60S ribosomal protein L37a; n=1; Capsicum chinense|Rep: 60S ribosomal protein L37a - Capsicum chinense (Scotch bonnet) (Bonnet pepper), complete	1.57665e-07	1.82878e-07	0	1.12175e-07	5.70606e-08	5.49234e-08	0	1.40798e-07	0	2.40934e-07	0	0	0	0.769903	0	2.14785	0	0	0	-1.29886	0	-0.465583	0	0
TC377315	TC377315 similar to UniRef100_P92917 Cluster: Af10-protein; n=1; Avena fatua|Rep: Af10-protein - Avena fatua (Wild oats), partial (26%)	3.07447e-06	2.31645e-06	5.29461e-06	7.23527e-06	5.76312e-06	4.33895e-06	4.40217e-06	4.01275e-06	3.26921e-06	5.54149e-06	4.40781e-06	4.81699e-06	1.43185	1.73228	0.61746	0.765899	0.76483	1.11017	-0.698399	-0.577273	-1.61954	-1.30566	-1.30748	-0.900759
TC384473	TC384473	8.67159e-07	7.31512e-07	5.6728e-07	5.60874e-07	5.13545e-07	3.2954e-07	4.07609e-07	3.51996e-07	5.70814e-07	4.81868e-07	2.7125e-07	6.69027e-07	0.470051	0.481189	1.00623	0.859138	0.52819	2.03018	-2.12743	-2.07818	-0.993808	-1.16396	-1.89326	-0.492567
comp10975_c0_seq1	comp10975_c0_seq1 len=173 path=[4:0-172]	1.57665e-06	1.28015e-06	1.32365e-06	1.85088e-06	1.94006e-06	1.92232e-06	1.71196e-06	1.26718e-06	2.49083e-06	2.04794e-06	1.89875e-06	1.27115e-06	1.08582	0.989875	1.88178	1.10647	0.978706	0.661259	-0.920966	-1.01023	-0.531411	-0.903778	-1.02176	-1.51227
TC419953	TC419953 similar to UniRef100_A1VV79 Cluster: UvrD/REP helicase; n=1; Polaromonas naphthalenivorans CJ2|Rep: UvrD/REP helicase - Polaromonas naphthalenivorans (strain CJ2), partial (3%)	6.30661e-07	9.75349e-07	1.32365e-06	1.3461e-06	1.48358e-06	1.37309e-06	8.15217e-07	9.15189e-07	1.19352e-06	1.20467e-06	9.49374e-07	8.02832e-07	1.29264	0.938319	0.901687	0.894936	0.639923	0.584692	-0.773611	-1.06574	-1.10903	-1.1174	-1.56269	-1.7103
TC424860	TC424860 weakly similar to UniRef100_A7P4W0 Cluster: Chromosome chr4 scaffold_6, whole genome shotgun sequence; n=1; Vitis vinifera|Rep: Chromosome chr4 scaffold_6, whole genome shotgun sequence - Vitis vinifera (Grape), partial (66%)	4.72996e-07	7.31512e-07	1.89093e-07	4.48699e-07	3.42364e-07	6.04157e-07	2.44565e-07	2.11197e-07	6.22707e-07	0	6.78124e-07	2.67611e-07	0.517056	0.288714	3.29312	0	1.98071	0.442948	-1.93403	-3.46364	-0.303663	0	-0.504868	-2.2576
CV782244	CV782244 weakly similar to UniRef100_Q2YHL0 Cluster: Cinnamyl alcohol dehydrogenase; n=1; Quercus ilex|Rep: Cinnamyl alcohol dehydrogenase - Quercus ilex (Holly oak), partial (52%)	0	6.09593e-08	0	5.60874e-08	5.70606e-08	5.49234e-08	0	0	5.18922e-08	0	1.35625e-07	0	0	0	0	0	2.37686	0	0	0	0	0	-0.420724	0
TC267478	TC267478 similar to UniRef100_Q7XLC6 Cluster: Probable potassium transporter 11; n=2; Oryza sativa Japonica Group|Rep: Probable potassium transporter 11 - Oryza sativa subsp. japonica (Rice), partial (64%)	4.72996e-07	9.1439e-07	5.6728e-07	6.16961e-07	5.70606e-07	6.59081e-07	3.26087e-07	4.92794e-07	6.74599e-07	6.02335e-07	6.78124e-07	4.01416e-07	0.689408	0.538932	1.18918	0.976294	1.18843	0.609054	-1.45052	-1.85552	-0.840914	-1.02428	-0.841447	-1.64189
TC377730	TC377730	6.38545e-06	6.33977e-06	1.19129e-05	1.26197e-05	1.39228e-05	1.0765e-05	9.53804e-06	9.57429e-06	1.19352e-05	1.36128e-05	9.62937e-06	1.19756e-05	1.49372	1.51019	1.00187	1.0787	0.691626	1.11246	-0.669471	-0.662166	-0.998129	-0.927045	-1.44587	-0.898912
CA634201	CA634201 similar to UniRef100_A3FPF4 Cluster: Thioredoxin-dependent peroxidase; n=1; Nelumbo nucifera|Rep: Thioredoxin-dependent peroxidase - Nelumbo nucifera (Sacred lotus), partial (76%) #or# CA641466 similar to UniRef100_Q7Y240 Cluster: Thioredoxin peroxidase 1; n=1; Solanum lycopersicum|Rep: Thioredoxin peroxidase 1 - Solanum lycopersicum (Tomato) (Lycopersicon esculentum), partial (70%) #or#…	0	6.09593e-08	0	0	0	0	1.63043e-07	7.03992e-08	0	0	0	0	0	1.15485	0	0	0	0	0	-0.86591	0	0	0	0
comp3751_c0_seq1	comp3751_c0_seq1 len=617 path=[0:0-616]	1.80527e-05	1.89584e-05	2.96876e-05	3.1465e-05	2.51637e-05	2.69125e-05	2.41304e-05	2.21053e-05	2.73472e-05	2.67437e-05	2.23781e-05	2.28138e-05	1.33667	1.16599	0.921164	0.84995	0.8893	0.847704	-0.748129	-0.857637	-1.08558	-1.17654	-1.12448	-1.17966
comp316_c0_seq33	comp316_c0_seq33 len=140 path=[1966:0-33 1468:34-39 1474:40-40 1151:41-41 806:42-47 812:48-49 814:50-51 816:52-53 818:54-55 536:56-62 543:63-63 544:64-68 629:69-74 635:75-77 663:78-79 665:80-103 584:104-139]	1.65549e-06	1.88974e-06	1.13456e-06	2.69219e-06	2.73891e-06	1.59278e-06	1.95652e-06	3.02716e-06	2.75029e-06	1.80701e-06	2.57687e-06	2.27469e-06	1.18184	1.60189	2.4241	0.671202	0.940839	1.42813	-0.846137	-0.624261	-0.412524	-1.48986	-1.06288	-0.700218
comp28259_c0_seq1	comp28259_c0_seq1 len=311 path=[0:0-310] : tr|B9RDT9|B9RDT9_RICCO Putative uncharacterized protein OS=Ricinus communis GN=RCOM_1615830 PE=4 SV=1 e-value: 4e-24 blast score: 110	3.94163e-07	3.04797e-07	0	0	0	0	2.44565e-07	2.11197e-07	0	0	0	0	0.620467	0.692913	0	0	0	0	-1.61169	-1.44318	0	0	0	0
comp9264_c0_seq1	comp9264_c0_seq1 len=388 path=[0:0-197 467:198-200 201:201-210 211:211-387] : tr|F2DTK9|F2DTK9_HORVD Predicted protein OS=Hordeum vulgare var. distichum PE=2 SV=1 e-value: 3e-09 blast score: 61.2	3.6263e-06	3.53564e-06	3.97096e-06	3.58959e-06	3.99424e-06	3.84464e-06	6.68478e-06	4.78714e-06	3.3211e-06	3.97541e-06	3.32281e-06	4.01416e-06	1.84342	1.35397	0.836348	1.10748	0.8319	1.04409	-0.542471	-0.73857	-1.19567	-0.902948	-1.20207	-0.957769
comp4634_c0_seq1	comp4634_c0_seq1 len=493 path=[0:0-492]	1.13519e-05	1.06679e-05	6.80736e-06	1.42462e-05	1.14121e-05	1.06002e-05	2.28261e-06	1.40798e-07	2.07569e-07	0	2.03437e-07	2.67611e-07	0.201077	0.0131983	0.0304918	0	0.0178264	0.0252458	-4.97321	-75.7671	-32.7957	0	-56.0965	-39.6106
comp841_c0_seq1	comp841_c0_seq1 len=551 path=[0:0-550] : tr|B3SYH6|B3SYH6_9POAL 50S ribosomal protein L32, chloroplastic 4 OS=Aegilops markgrafii GN=rpl32 PE=3 SV=1 e-value: 2e-29 blast score: 129	0.000196136	0.00023323	0.000200628	0.000484876	0.000327528	0.000368426	0.000333342	0.000258787	0.000439631	0.000258402	0.000494827	0.000358197	1.69955	1.10958	2.19127	0.532924	1.51079	0.972235	-0.588391	-0.901244	-0.456355	-1.87644	-0.661903	-1.02856
comp8665_c0_seq1	comp8665_c0_seq1 len=583 path=[5:0-582] : tr|B9FZ01|B9FZ01_ORYSJ Putative uncharacterized protein OS=Oryza sativa subsp. japonica GN=OsJ_25989 PE=4 SV=1 e-value: 2e-10 blast score: 66.6	9.53875e-06	7.37608e-06	1.05892e-05	1.32366e-05	1.29528e-05	8.6779e-06	1.44293e-05	1.29534e-05	1.10012e-05	9.75783e-06	8.54437e-06	1.38488e-05	1.51271	1.75614	1.0389	0.737184	0.659656	1.59588	-0.661066	-0.56943	-0.962556	-1.35651	-1.51594	-0.626615
comp693_c0_seq1	comp693_c0_seq1 len=477 path=[0:0-476] : tr|Q8GZD0|Q8GZD0_HORVD Biogenesis protein OS=Hordeum vulgare var. distichum GN=CCDA PE=2 SV=1 e-value: 2e-15 blast score: 82.0	8.95539e-05	8.03444e-05	0.000123478	0.000124682	0.000133179	0.000106387	7.62228e-05	7.68055e-05	9.4859e-05	9.76988e-05	8.41552e-05	9.03855e-05	0.851139	0.955953	0.768226	0.783582	0.631894	0.849594	-1.1749	-1.04608	-1.3017	-1.27619	-1.58254	-1.17703
comp6807_c0_seq1	comp6807_c0_seq1 len=192 path=[7:0-57 220:58-63 81:64-191]	1.02482e-06	7.31512e-07	0	6.73049e-07	1.25533e-06	2.30678e-06	6.52174e-07	1.26718e-06	1.45298e-06	7.22803e-07	1.49187e-06	7.35929e-07	0.636376	1.73228	0	1.07392	1.18843	0.319028	-1.5714	-0.577273	0	-0.931165	-0.841447	-3.13452
BJ216982	BJ216982 similar to UniRef100_A7QEY0 Cluster: Chromosome chr16 scaffold_86, whole genome shotgun sequence; n=1; Vitis vinifera|Rep: Chromosome chr16 scaffold_86, whole genome shotgun sequence - Vitis vinifera (Grape), partial (80%)	1.57665e-07	6.09593e-08	0	5.60874e-08	5.70606e-08	1.09847e-07	0	7.03992e-08	5.18922e-08	0	6.78124e-08	6.69027e-08	0	1.15485	0	0	1.18843	0.609054	0	-0.86591	0	0	-0.841447	-1.64189
comp1661_c0_seq1	comp1661_c0_seq1 len=430 path=[0:0-429] : tr|F2CR55|F2CR55_HORVD Predicted protein OS=Hordeum vulgare var. distichum PE=3 SV=1 e-value: 2e-21 blast score: 102	2.68819e-05	2.79803e-05	2.34476e-05	3.26429e-05	2.8245e-05	3.33385e-05	2.64946e-05	2.40765e-05	2.03417e-05	1.72268e-05	2.43447e-05	2.72294e-05	0.98559	0.86048	0.867542	0.527735	0.861911	0.816755	-1.01462	-1.16214	-1.15268	-1.89489	-1.16021	-1.22436
comp2479_c0_seq1	comp2479_c0_seq1 len=347 path=[0:0-346] : tr|C0KTS7|C0KTS7_WHEAT Hypersensitive induced response protein 3 OS=Triticum aestivum GN=hir3 PE=2 SV=1 e-value: 8e-09 blast score: 60.1	1.54512e-05	8.96102e-06	6.73172e-05	8.11024e-05	6.56197e-05	2.66379e-05	8.73098e-05	4.6041e-05	1.20909e-05	4.04769e-05	8.81562e-06	3.71979e-05	5.65068	5.13792	0.179611	0.499085	0.134344	1.39643	-0.17697	-0.194631	-5.5676	-2.00367	-7.44357	-0.716112
comp40765_c0_seq1	comp40765_c0_seq1 len=170 path=[0:0-169]	0	1.82878e-07	0	1.68262e-07	5.70606e-08	2.74617e-07	8.15217e-08	7.03992e-08	1.03784e-07	0	6.78124e-08	0	0	0.384951	0	0	1.18843	0	0	-2.59773	0	0	-0.841447	0
comp25684_c0_seq1	comp25684_c0_seq1 len=263 path=[0:0-262]	3.94163e-07	9.1439e-07	1.32365e-06	7.29136e-07	1.02709e-06	8.78775e-07	6.52174e-07	1.05599e-06	7.78383e-07	9.63737e-07	6.10312e-07	1.20425e-06	1.65458	1.15485	0.588057	1.32175	0.594214	1.37037	-0.604384	-0.86591	-1.70052	-0.756572	-1.68289	-0.729729
comp2591_c0_seq1	comp2591_c0_seq1 len=428 path=[0:0-427] : tr|F2DAB5|F2DAB5_HORVD Predicted protein OS=Hordeum vulgare var. distichum PE=2 SV=1 e-value: 4e-26 blast score: 117	1.63184e-05	1.99947e-05	1.00219e-05	1.21149e-05	1.6034e-05	1.8619e-05	1.25543e-05	1.41502e-05	2.68283e-05	1.03602e-05	2.821e-05	2.10743e-05	0.769339	0.7077	2.67695	0.855161	1.75938	1.13187	-1.29982	-1.41303	-0.373559	-1.16937	-0.568382	-0.883493
comp19892_c0_seq1	comp19892_c0_seq1 len=224 path=[0:0-223]	4.72996e-07	7.92471e-07	0	0	0	0	9.78261e-07	8.4479e-07	0	0	0	0	2.06822	1.06602	0	0	0	0	-0.483507	-0.938069	0	0	0	0
comp15044_c0_seq1	comp15044_c0_seq1 len=359 path=[0:0-358]	1.41899e-06	1.58494e-06	2.45821e-06	3.58959e-06	4.85015e-06	1.70263e-06	1.30435e-06	1.68958e-06	2.17947e-06	1.20467e-06	1.35625e-06	1.67257e-06	0.91921	1.06602	0.886609	0.335601	0.27963	0.982345	-1.08789	-0.938069	-1.12789	-2.97973	-3.57615	-1.01797
comp1869_c0_seq1	comp1869_c0_seq1 len=796 path=[0:0-795]	3.35039e-05	4.24277e-05	5.20006e-05	4.90204e-05	5.71747e-05	4.48724e-05	2.31522e-05	2.52029e-05	4.41084e-05	3.65015e-05	5.09271e-05	4.10113e-05	0.69103	0.59402	0.848228	0.744619	0.890728	0.913954	-1.44712	-1.68345	-1.17893	-1.34297	-1.12268	-1.09415
comp1748_c0_seq1	comp1748_c0_seq1 len=523 path=[0:0-522] : tr|F2DZ80|F2DZ80_HORVD Predicted protein OS=Hordeum vulgare var. distichum PE=2 SV=1 e-value: 7e-09 blast score: 60.8	2.86163e-05	3.35276e-05	1.87202e-05	1.53119e-05	2.33378e-05	2.49352e-05	2.25815e-05	2.31613e-05	2.05493e-05	1.93952e-05	1.56647e-05	2.14088e-05	0.789115	0.690813	1.09771	1.26668	0.671215	0.858578	-1.26724	-1.44757	-0.91099	-0.789466	-1.48984	-1.16472
TC426862	TC426862 weakly similar to UniRef100_Q0IMY5 Cluster: Os12g0528000 protein; n=1; Oryza sativa Japonica Group|Rep: Os12g0528000 protein - Oryza sativa subsp. japonica (Rice), partial (9%) #or# TC439452 #or# TC459808 similar to UniRef100_Q9SI77 Cluster: F23N19.9; n=1; Arabidopsis thaliana|Rep: F23N19.9 - Arabidopsis thaliana (Mouse-ear cress), partial (79%)	7.88327e-08	0	3.78187e-07	0	1.14121e-07	0	8.15217e-08	1.40798e-07	5.18922e-08	1.20467e-07	1.35625e-07	0	1.03411	0	0.137213	0	1.18843	0	-0.967014	0	-7.28792	0	-0.841447	0
comp487_c0_seq1	comp487_c0_seq1 len=552 path=[0:0-351 352:352-551] : tr|F2D8N3|F2D8N3_HORVD Predicted protein OS=Hordeum vulgare var. distichum PE=2 SV=1 e-value: 1e-37 blast score: 156	0.00231137	0.00231816	0.000979692	0.00103947	0.00121334	0.00224505	0.00129204	0.00162735	0.00209624	0.00172894	0.00235635	0.00185314	0.558991	0.701999	2.13969	1.6633	1.94204	0.825432	-1.78894	-1.4245	-0.467357	-0.601215	-0.514923	-1.21149
comp46722_c0_seq1	comp46722_c0_seq1 len=115 path=[2:0-114]	7.88327e-08	0	0	5.60874e-08	0	0	0	0	0	1.20467e-07	0	6.69027e-08	0	0	0	2.14785	0	0	0	0	0	-0.465583	0	0
comp21182_c0_seq1	comp21182_c0_seq1 len=374 path=[0:0-373]	1.10366e-06	9.75349e-07	1.32365e-06	1.3461e-06	1.82594e-06	1.09847e-06	2.52717e-06	1.97118e-06	2.6984e-06	1.32514e-06	1.89875e-06	2.14088e-06	2.28982	2.021	2.0386	0.984429	1.03987	1.94897	-0.436716	-0.494806	-0.490533	-1.01582	-0.961654	-0.513091
TC404812	TC404812 similar to UniRef100_Q0JIL0 Cluster: Os01g0794500 protein; n=1; Oryza sativa Japonica Group|Rep: Os01g0794500 protein - Oryza sativa subsp. japonica (Rice), partial (92%)	0	0	0	5.60874e-08	5.70606e-08	0	8.15217e-08	0	0	1.20467e-07	6.78124e-08	0	0	0	0	2.14785	1.18843	0	0	0	0	-0.465583	-0.841447	0
comp28440_c0_seq1	comp28440_c0_seq1 len=181 path=[0:0-180]	2.36498e-07	2.43837e-07	3.78187e-07	2.80437e-07	3.99424e-07	2.74617e-07	4.8913e-07	3.51996e-07	5.18922e-07	3.61401e-07	6.78124e-08	5.35221e-07	2.06822	1.44357	1.37213	1.28871	0.169775	1.94897	-0.483507	-0.692728	-0.728792	-0.775971	-5.89013	-0.513091
comp11957_c0_seq1	comp11957_c0_seq1 len=190 path=[0:0-189]	3.78397e-06	3.71852e-06	6.42917e-06	6.11353e-06	6.84727e-06	6.15142e-06	4.23913e-06	5.63193e-06	8.76978e-06	7.34849e-06	8.61218e-06	8.36283e-06	1.12029	1.51456	1.36406	1.20201	1.25775	1.3595	-0.892628	-0.660256	-0.733105	-0.831943	-0.795068	-0.735567
comp28684_c0_seq1	comp28684_c0_seq1 len=214 path=[0:0-213]	2.36498e-07	2.43837e-07	3.78187e-07	3.92612e-07	4.56485e-07	1.09847e-07	8.15217e-08	7.03992e-08	0	1.20467e-07	0	6.69027e-08	0.344704	0.288714	0	0.306835	0	0.609054	-2.90104	-3.46364	0	-3.25908	0	-1.64189
FC925151	FC925151	0	1.82878e-07	0	0	0	0	0	7.03992e-08	0	0	0	0	0	0.384951	0	0	0	0	0	-2.59773	0	0	0	0
TC275076	TC275076 homologue to UniRef100_Q9T0K5 Cluster: Extensin-like protein; n=1; Arabidopsis thaliana|Rep: Extensin-like protein - Arabidopsis thaliana (Mouse-ear cress), partial (3%)	5.51829e-07	6.70553e-07	1.89093e-07	6.16961e-07	6.27667e-07	4.39387e-07	6.52174e-07	1.05599e-06	5.70814e-07	4.81868e-07	2.03437e-07	6.69027e-07	1.18184	1.5748	3.01869	0.781035	0.324117	1.52264	-0.846137	-0.635001	-0.331269	-1.28035	-3.08531	-0.656756
CA681377	CA681377	7.88327e-08	0	0	5.60874e-08	0	0	0	0	0	1.20467e-07	0	0	0	0	0	2.14785	0	0	0	0	0	-0.465583	0	0
comp32172_c0_seq1	comp32172_c0_seq1 len=253 path=[0:0-252]	3.94163e-07	4.26715e-07	1.89093e-07	2.80437e-07	1.71182e-07	2.74617e-07	8.15217e-08	3.51996e-07	4.15138e-07	8.4327e-07	4.74687e-07	6.69027e-07	0.206822	0.824896	2.19541	3.00698	2.773	2.43622	-4.83507	-1.21227	-0.455495	-0.332559	-0.36062	-0.410473
comp45198_c0_seq1	comp45198_c0_seq1 len=152 path=[0:0-151]	0	6.09593e-08	1.89093e-07	5.60874e-07	2.85303e-07	4.39387e-07	1.63043e-07	4.22395e-07	3.63246e-07	1.20467e-07	1.35625e-07	0	0	6.92913	1.92099	0.214785	0.475371	0	0	-0.144318	-0.520566	-4.65583	-2.10362	0
comp1743_c0_seq1	comp1743_c0_seq1 len=862 path=[0:0-861] : tr|F2CQC8|F2CQC8_HORVD Predicted protein (Fragment) OS=Hordeum vulgare var. distichum PE=2 SV=1 e-value: 5e-12 blast score: 72.8	6.40121e-05	7.32731e-05	5.29461e-05	6.21448e-05	6.71033e-05	6.44801e-05	6.13044e-05	5.95577e-05	4.22922e-05	4.4091e-05	4.89606e-05	5.23179e-05	0.957699	0.812818	0.798777	0.709487	0.72963	0.81138	-1.04417	-1.23029	-1.25191	-1.40947	-1.37056	-1.23247
comp30451_c0_seq1	comp30451_c0_seq1 len=130 path=[0:0-129]	0	2.43837e-07	0	1.68262e-07	0	1.6477e-07	0	0	2.07569e-07	1.20467e-07	6.78124e-08	0	0	0	0	0.715949	0	0	0	0	0	-1.39675	0	0
comp5028_c0_seq1	comp5028_c0_seq1 len=237 path=[0:0-236]	3.07447e-06	3.41372e-06	0	0	0	0	2.77174e-06	2.53437e-06	0	0	6.78124e-08	6.69027e-08	0.901533	0.742406	0	0	0	0	-1.10922	-1.34697	0	0	0	0
comp24085_c0_seq1	comp24085_c0_seq1 len=399 path=[0:0-398] : tr|B9FAM9|B9FAM9_ORYSJ Putative uncharacterized protein OS=Oryza sativa subsp. japonica GN=OsJ_12142 PE=4 SV=1 e-value: 4e-12 blast score: 70.9	5.51829e-07	2.43837e-07	0	0	0	0	9.78261e-07	4.92794e-07	0	1.20467e-07	0	0	1.77276	2.021	0	0	0	0	-0.564091	-0.494806	0	0	0	0
comp9405_c0_seq1	comp9405_c0_seq1 len=366 path=[0:0-365] : tr|F2CX30|F2CX30_HORVD Predicted protein OS=Hordeum vulgare var. distichum PE=2 SV=1 e-value: 9e-05 blast score: 46.6	3.31097e-06	3.96236e-06	2.26912e-06	2.46785e-06	4.22249e-06	3.89956e-06	5.70652e-07	2.11197e-07	1.03784e-07	0	0	6.69027e-08	0.172352	0.053301	0.0457378	0	0	0.0171565	-5.80208	-18.7614	-21.8638	0	0	-58.2871
CA664646	CA664646 homologue to UniRef100_Q7YMS6 Cluster: Ribulose bisphosphate carboxylase large chain; n=1; Hordeum patagonicum subsp. mustersii|Rep: Ribulose bisphosphate carboxylase large chain - Hordeum patagonicum subsp. mustersii, partial (25%)	7.88327e-08	1.21919e-07	0	1.12175e-07	5.70606e-08	1.09847e-07	0	7.03992e-08	1.03784e-07	1.20467e-07	2.03437e-07	6.69027e-08	0	0.577427	0	1.07392	3.56529	0.609054	0	-1.73182	0	-0.931165	-0.280482	-1.64189
comp18602_c0_seq1	comp18602_c0_seq1 len=253 path=[0:0-252]	3.31097e-06	2.37741e-06	5.6728e-07	1.85088e-06	1.31239e-06	8.78775e-07	1.30435e-06	2.18237e-06	1.08974e-06	1.20467e-07	6.78124e-07	8.02832e-07	0.393947	0.917961	1.92099	0.0650862	0.516708	0.913581	-2.53841	-1.08937	-0.520566	-15.3642	-1.93533	-1.09459
TC372927	TC372927 similar to UniRef100_Q0JIF7 Cluster: Os01g0805100 protein; n=2; Oryza sativa Japonica Group|Rep: Os01g0805100 protein - Oryza sativa subsp. japonica (Rice), partial (47%)	0	1.82878e-07	0	5.60874e-08	0	5.49234e-08	1.63043e-07	7.03992e-08	5.18922e-08	0	6.78124e-08	0	0	0.384951	0	0	0	0	0	-2.59773	0	0	0	0
comp85_c0_seq1	comp85_c0_seq1 len=551 path=[0:0-550] : tr|F2DCN0|F2DCN0_HORVD Predicted protein OS=Hordeum vulgare var. distichum PE=2 SV=1 e-value: 1e-30 blast score: 133	0.000474888	0.000440492	0.001061	0.000647473	0.000653458	0.000467618	0.000769973	0.000808957	0.000485555	0.000532465	0.000615534	0.000605803	1.62138	1.83648	0.457639	0.822374	0.941963	1.29551	-0.616759	-0.544519	-2.18513	-1.21599	-1.06161	-0.771897
TC416683	TC416683	2.44381e-06	1.46302e-06	2.8364e-06	3.36524e-06	2.85303e-06	2.30678e-06	3.42391e-06	2.32317e-06	2.59461e-06	2.04794e-06	1.01719e-06	2.07398e-06	1.40105	1.58792	0.914755	0.608556	0.356529	0.89908	-0.713748	-0.629753	-1.09319	-1.64323	-2.80482	-1.11225
comp6865_c0_seq1	comp6865_c0_seq1 len=265 path=[2:0-264]	4.80879e-06	3.96236e-06	1.05892e-05	1.22831e-05	1.18686e-05	8.62298e-06	5.29891e-06	5.49113e-06	8.87357e-06	1.07216e-05	6.17093e-06	7.56e-06	1.10192	1.38583	0.837981	0.872869	0.519937	0.876728	-0.907505	-0.721592	-1.19334	-1.14565	-1.92331	-1.14061
GH725967	GH725967 similar to UniRef100_A6RR16 Cluster: Predicted protein; n=1; Botryotinia fuckeliana B05.10|Rep: Predicted protein - Botryotinia fuckeliana (strain B05.10) (Noble rot fungus) (Botrytiscinerea), partial (7%)	7.88327e-08	0	0	5.60874e-08	0	1.09847e-07	0	0	0	0	1.35625e-07	6.69027e-08	0	0	0	0	0	0.609054	0	0	0	0	0	-1.64189
comp161_c0_seq1	comp161_c0_seq1 len=885 path=[0:0-884] : tr|D3K4D8|D3K4D8_WHEAT ATP synthase gamma chain OS=Triticum aestivum PE=2 SV=1 e-value: 1e-63 blast score: 244	0.00290002	0.00309033	0.00216228	0.00225067	0.00248858	0.00273063	0.00199207	0.00227234	0.00248403	0.00232405	0.00266266	0.00236588	0.686915	0.735307	1.1488	1.0326	1.06995	0.866423	-1.45578	-1.35998	-0.870474	-0.968427	-0.934625	-1.15417
comp17810_c0_seq1	comp17810_c0_seq1 len=248 path=[0:0-247]	5.51829e-06	6.40073e-06	8.3201e-06	1.06566e-05	6.90433e-06	8.40328e-06	6.60326e-06	7.81431e-06	7.88762e-06	7.34849e-06	5.83187e-06	7.96142e-06	1.19661	1.22085	0.948019	0.689572	0.844668	0.947417	-0.835691	-0.819104	-1.05483	-1.45018	-1.1839	-1.0555
TC250013	TC250013 homologue to UniRef100_Q5I7K9 Cluster: 60S ribosomal protein L30; n=1; Triticum aestivum|Rep: 60S ribosomal protein L30 - Triticum aestivum (Wheat), complete #or# TC255786 homologue to UniRef100_Q5I7K9 Cluster: 60S ribosomal protein L30; n=1; Triticum aestivum|Rep: 60S ribosomal protein L30 - Triticum aestivum (Wheat), complete	0	0	1.89093e-07	5.60874e-08	0	0	0	0	1.03784e-07	0	0	0	0	0	0.548853	0	0	0	0	0	-1.82198	0	0	0
TC405350	TC405350 similar to UniRef100_A7NTQ4 Cluster: Chromosome chr18 scaffold_1, whole genome shotgun sequence; n=1; Vitis vinifera|Rep: Chromosome chr18 scaffold_1, whole genome shotgun sequence - Vitis vinifera (Grape), partial (64%)	2.52265e-06	7.31512e-07	1.51275e-06	2.69219e-06	1.76888e-06	1.31816e-06	3.0163e-06	2.88637e-06	1.92001e-06	2.04794e-06	2.17e-06	2.74301e-06	1.19569	3.94575	1.26922	0.760696	1.22676	2.08093	-0.836336	-0.253437	-0.787884	-1.31459	-0.815152	-0.480553
comp3438_c0_seq1	comp3438_c0_seq1 len=301 path=[0:0-300]	8.75043e-06	1.12775e-05	6.42917e-06	8.07658e-06	7.76024e-06	1.07101e-05	7.17391e-06	8.6591e-06	1.04822e-05	8.0713e-06	1.22062e-05	1.11727e-05	0.819836	0.767822	1.63042	0.999345	1.57292	1.0432	-1.21976	-1.30238	-0.61334	-1.00066	-0.63576	-0.958589
TC383246	TC383246 similar to UniRef100_Q6IEQ6 Cluster: WRKY transcription factor 25; n=2; Oryza sativa Japonica Group|Rep: WRKY transcription factor 25 - Oryza sativa subsp. japonica (Rice), partial (51%)	1.41899e-06	1.21919e-06	3.78187e-07	1.06566e-06	1.19827e-06	1.37309e-06	1.38587e-06	2.11197e-06	1.40109e-06	1.0842e-06	2.78031e-06	1.53876e-06	0.976661	1.73228	3.70476	1.0174	2.32027	1.12066	-1.0239	-0.577273	-0.269923	-0.982897	-0.430985	-0.892332
comp24525_c0_seq1	comp24525_c0_seq1 len=272 path=[0:0-126 127:127-271]	3.15331e-07	3.04797e-07	0	0	0	5.49234e-08	3.26087e-07	1.40798e-07	0	0	0	0	1.03411	0.461942	0	0	0	0	-0.967014	-2.16477	0	0	0	0
comp3577_c0_seq1	comp3577_c0_seq1 len=331 path=[0:0-330]	1.07212e-05	1.23747e-05	1.04001e-05	1.5424e-05	1.42652e-05	1.32365e-05	1.20652e-05	1.04191e-05	1.58271e-05	1.33718e-05	1.41728e-05	1.5789e-05	1.12536	0.841963	1.52182	0.866949	0.993526	1.19284	-0.888607	-1.1877	-0.657108	-1.15347	-1.00652	-0.838338
CA683793	CA683793 #or# CA686223	0	6.09593e-08	0	0	5.70606e-08	5.49234e-08	0	7.03992e-08	5.18922e-08	0	0	6.69027e-08	0	1.15485	0	0	0	1.21811	0	-0.86591	0	0	0	-0.820945
comp10236_c0_seq1	comp10236_c0_seq1 len=383 path=[0:0-382] : tr|F2DMZ2|F2DMZ2_HORVD Predicted protein OS=Hordeum vulgare var. distichum PE=2 SV=1 e-value: 1e-28 blast score: 125	1.73432e-05	1.47522e-05	5.97535e-05	5.73213e-05	4.68468e-05	2.48254e-05	3.375e-05	3.42844e-05	2.52715e-05	3.67425e-05	1.51222e-05	2.43526e-05	1.94601	2.32403	0.42293	0.640991	0.322801	0.980954	-0.513872	-0.430288	-2.36446	-1.56008	-3.09788	-1.01942
comp6070_c0_seq1	comp6070_c0_seq1 len=533 path=[0:0-367 368:368-371 372:372-532] : tr|F2CX73|F2CX73_HORVD Predicted protein OS=Hordeum vulgare var. distichum PE=2 SV=1 e-value: 9e-34 blast score: 143	1.6003e-05	1.71905e-05	2.98767e-05	2.78193e-05	2.14548e-05	2.51549e-05	3.09783e-05	2.67517e-05	3.04088e-05	2.7346e-05	2.19712e-05	2.64934e-05	1.93577	1.55619	1.01781	0.982986	1.02407	1.05321	-0.516589	-0.642596	-0.982502	-1.01731	-0.976495	-0.949477
comp36677_c0_seq1	comp36677_c0_seq1 len=316 path=[2:0-315]	7.88327e-08	3.65756e-07	3.78187e-07	2.80437e-07	2.28242e-07	3.84464e-07	2.44565e-07	7.03992e-08	1.55677e-07	6.02335e-07	6.78124e-08	4.68319e-07	3.10233	0.192476	0.41164	2.14785	0.297107	1.21811	-0.322338	-5.19546	-2.42931	-0.465583	-3.36579	-0.820945
comp24943_c0_seq1	comp24943_c0_seq1 len=232 path=[5:0-231]	5.51829e-07	2.43837e-07	0	5.60874e-08	1.14121e-07	2.74617e-07	8.15217e-08	2.11197e-07	1.66055e-06	1.20467e-07	2.7125e-07	6.69027e-08	0.14773	0.866141	0	2.14785	2.37686	0.243622	-6.7691	-1.15455	0	-0.465583	-0.420724	-4.10473
comp25542_c0_seq1	comp25542_c0_seq1 len=445 path=[0:0-444]	5.51829e-07	7.92471e-07	0	0	0	0	5.70652e-07	1.12639e-06	0	0	0	0	1.03411	1.42136	0	0	0	0	-0.967014	-0.703552	0	0	0	0
comp5024_c0_seq1	comp5024_c0_seq1 len=578 path=[0:0-577] : tr|B9R8G0|B9R8G0_RICCO Plastocyanin A, chloroplast, putative OS=Ricinus communis GN=RCOM_1599580 PE=4 SV=1 e-value: 1e-22 blast score: 106	9.38109e-06	1.02412e-05	0	0	0	0	1.18207e-05	1.02783e-05	2.59461e-07	2.40934e-07	0	2.67611e-07	1.26005	1.00362	0	0	0	0	-0.793618	-0.99639	0	0	0	0
comp1111_c0_seq1	comp1111_c0_seq1 len=527 path=[0:0-526] : tr|C5YXF3|C5YXF3_SORBI Putative uncharacterized protein Sb09g019100 OS=Sorghum bicolor GN=Sb09g019100 PE=4 SV=1 e-value: 6e-22 blast score: 104	7.59947e-05	8.75986e-05	5.04879e-05	6.50614e-05	7.53771e-05	6.70615e-05	5.0788e-05	4.94202e-05	3.54943e-05	2.33706e-05	4.65872e-05	4.41557e-05	0.668311	0.564167	0.703025	0.359209	0.618055	0.658437	-1.49631	-1.77253	-1.42242	-2.7839	-1.61798	-1.51875
TC239824	TC239824 homologue to UniRef100_Q10E03 Cluster: Ubiquitin-conjugating enzyme family protein, expressed; n=1; Oryza sativa Japonica Group|Rep: Ubiquitin-conjugating enzyme family protein, expressed - Oryza sativa subsp. japonica (Rice), complete	1.18249e-05	1.10336e-05	1.96657e-05	1.49753e-05	1.74035e-05	1.02707e-05	1.64674e-05	1.80222e-05	1.36477e-05	1.39742e-05	1.11891e-05	1.37819e-05	1.3926	1.63339	0.693983	0.933147	0.64292	1.34187	-0.71808	-0.612225	-1.44096	-1.07164	-1.5554	-0.745227
comp24770_c0_seq1	comp24770_c0_seq1 len=226 path=[0:0-225]	3.15331e-07	4.87675e-07	3.78187e-07	3.92612e-07	3.99424e-07	1.09847e-07	5.70652e-07	2.81597e-07	3.63246e-07	6.02335e-07	2.03437e-07	3.34513e-07	1.80969	0.577427	0.960493	1.53418	0.509326	3.04527	-0.552579	-1.73182	-1.04113	-0.651816	-1.96338	-0.328378
comp11513_c0_seq1	comp11513_c0_seq1 len=320 path=[0:0-201 268:202-319]	5.28179e-06	5.42538e-06	4.72733e-06	6.11353e-06	6.90433e-06	6.8105e-06	6.68478e-06	5.63193e-06	5.76004e-06	5.05962e-06	8.06968e-06	7.42619e-06	1.26563	1.03807	1.21845	0.82761	1.16878	1.0904	-0.790121	-0.963325	-0.820712	-1.2083	-0.855589	-0.917092
comp13510_c0_seq1	comp13510_c0_seq1 len=492 path=[0:0-491]	3.8628e-06	2.62125e-06	1.0211e-05	1.16662e-05	1.02709e-05	5.65711e-06	5.38044e-06	5.49113e-06	4.92976e-06	7.83036e-06	5.28937e-06	6.48956e-06	1.39288	2.09485	0.482788	0.671202	0.514986	1.14715	-0.717935	-0.477361	-2.0713	-1.48986	-1.9418	-0.871725
comp28931_c0_seq1	comp28931_c0_seq1 len=228 path=[0:0-227]	1.65549e-06	1.58494e-06	1.70184e-06	2.18741e-06	1.82594e-06	2.08709e-06	2.20109e-06	1.97118e-06	1.92001e-06	2.04794e-06	8.81562e-07	2.4754e-06	1.32957	1.24369	1.1282	0.936241	0.482799	1.18605	-0.752122	-0.804059	-0.886369	-1.0681	-2.07126	-0.843133
TC14120	TC14120 homologue to UniRef100_A7PDH8 Cluster: Chromosome chr17 scaffold_12, whole genome shotgun sequence; n=1; Vitis vinifera|Rep: Chromosome chr17 scaffold_12, whole genome shotgun sequence - Vitis vinifera (Grape), partial (6%) #or# TC34056 homologue to UniRef100_A7PX89 Cluster: Chromosome chr12 scaffold_36, whole genome shotgun sequence; n=1; Vitis vinifera|Rep: Chromosome chr12 scaffold_36,…	7.88327e-08	0	0	0	0	0	8.15217e-08	4.22395e-07	0	0	0	0	1.03411	0	0	0	0	0	-0.967014	0	0	0	0	0
comp26542_c0_seq1	comp26542_c0_seq1 len=293 path=[0:0-292]	3.94163e-07	3.04797e-07	0	0	0	0	4.07609e-07	5.63193e-07	0	0	0	0	1.03411	1.84777	0	0	0	0	-0.967014	-0.541194	0	0	0	0
comp10630_c0_seq1	comp10630_c0_seq1 len=482 path=[0:0-481] : tr|Q8S3J5|Q8S3J5_WHEAT Ferredoxin OS=Triticum aestivum PE=2 SV=1 e-value: 8e-12 blast score: 70.5	2.48323e-05	1.88364e-05	2.40148e-05	3.38768e-05	2.57914e-05	3.10866e-05	2.89402e-05	3.04828e-05	2.9838e-05	3.05986e-05	2.387e-05	2.95041e-05	1.16543	1.61829	1.24248	0.903233	0.925502	0.949091	-0.858055	-0.617936	-0.80484	-1.10713	-1.08049	-1.05364
comp42635_c0_seq1	comp42635_c0_seq1 len=138 path=[0:0-137] : tr|Q0DF13|Q0DF13_ORYSJ Os06g0124900 protein (Fragment) OS=Oryza sativa subsp. japonica GN=Os06g0124900 PE=4 SV=1 e-value: 2e-05 blast score: 48.5	7.88327e-08	6.09593e-08	0	0	1.14121e-07	0	8.15217e-08	1.40798e-07	0	0	6.78124e-08	0	1.03411	2.30971	0	0	0.594214	0	-0.967014	-0.432955	0	0	-1.68289	0
comp23427_c0_seq1	comp23427_c0_seq1 len=233 path=[0:0-232]	4.72996e-07	6.09593e-07	1.89093e-07	5.60874e-08	1.71182e-07	5.49234e-08	0	7.03992e-08	1.03784e-07	0	1.35625e-07	0	0	0.115485	0.548853	0	0.792286	0	0	-8.6591	-1.82198	0	-1.26217	0
comp35991_c0_seq1	comp35991_c0_seq1 len=248 path=[0:0-247]	3.15331e-07	0	5.6728e-07	2.80437e-07	2.28242e-07	2.74617e-07	2.44565e-07	7.03992e-08	1.03784e-07	3.61401e-07	2.7125e-07	2.67611e-07	0.775583	0	0.182951	1.28871	1.18843	0.974487	-1.28935	0	-5.46594	-0.775971	-0.841447	-1.02618
comp38917_c0_seq1	comp38917_c0_seq1 len=194 path=[0:0-193] : tr|G8Z282|G8Z282_SOLLC Hop-interacting protein THI119 OS=Solanum lycopersicum PE=2 SV=1 e-value: 2e-12 blast score: 72.0	7.88327e-08	6.09593e-08	0	0	0	0	1.63043e-07	0	0	0	0	0	2.06822	0	0	0	0	0	-0.483507	0	0	0	0	0
comp2125_c0_seq1	comp2125_c0_seq1 len=311 path=[0:0-310]	1.8841e-05	1.51179e-05	2.30694e-05	3.80833e-05	2.53349e-05	2.37269e-05	3.02446e-05	2.48509e-05	2.38185e-05	2.68642e-05	1.68853e-05	2.23455e-05	1.60525	1.6438	1.03247	0.705405	0.666484	0.941778	-0.622955	-0.608345	-0.968548	-1.41763	-1.50041	-1.06182
CK158500	CK158500 homologue to UniRef100_Q95H51 Cluster: Chloroplast 50S ribosomal protein L14; n=1; Triticum aestivum|Rep: Chloroplast 50S ribosomal protein L14 - Triticum aestivum (Wheat), complete #or# DR732606 similar to UniRef100_A1EA45 Cluster: Chloroplast 50S ribosomal protein L14; n=3; Pooideae|Rep: Chloroplast 50S ribosomal protein L14 - Agrostis stolonifera (Creeping bentgrass), complete	7.88327e-08	0	3.78187e-07	5.60874e-08	0	5.49234e-08	8.15217e-08	7.03992e-08	0	0	1.35625e-07	0	1.03411	0	0	0	0	0	-0.967014	0	0	0	0	0
comp29641_c0_seq1	comp29641_c0_seq1 len=251 path=[0:0-250]	4.72996e-07	1.82878e-07	5.6728e-07	4.48699e-07	1.19827e-06	2.74617e-07	1.71196e-06	9.85588e-07	3.63246e-07	7.22803e-07	2.7125e-07	8.02832e-07	3.61939	5.38932	0.640329	1.61088	0.226367	2.92346	-0.27629	-0.185552	-1.5617	-0.620777	-4.4176	-0.34206
CA607939	CA607939 homologue to UniRef100_P43400 Cluster: Metallothionein-like protein 1; n=3; Triticum|Rep: Metallothionein-like protein 1 - Triticum aestivum (Wheat), partial (97%) #or# CA608643 homologue to UniRef100_P43400 Cluster: Metallothionein-like protein 1; n=3; Triticum|Rep: Metallothionein-like protein 1 - Triticum aestivum (Wheat), partial (96%) #or# CA615583 homologue to UniRef100_P43400 Clus…	0	0	0	0	0	5.49234e-08	0	7.03992e-08	5.18922e-08	0	0	6.69027e-08	0	0	0	0	0	1.21811	0	0	0	0	0	-0.820945
comp6360_c0_seq1	comp6360_c0_seq1 len=584 path=[0:0-170 386:171-503 719:504-525 741:526-583] : tr|F2DIW4|F2DIW4_HORVD Predicted protein OS=Hordeum vulgare var. distichum PE=2 SV=1 e-value: 2e-24 blast score: 112 #or# comp6360_c0_seq2 len=549 path=[0:0-170 386:171-503 719:504-525 878:526-548] : tr|F2DIW4|F2DIW4_HORVD Predicted protein OS=Hordeum vulgare var. distichum PE=2 SV=1 e-value: 2e-24 blast score: 112	6.14895e-06	9.99733e-06	4.72733e-06	1.90697e-06	4.50779e-06	7.85405e-06	5.86957e-06	5.98393e-06	8.71789e-06	3.37308e-06	1.24097e-05	8.83115e-06	0.954564	0.598553	1.84415	1.76881	2.75294	1.12441	-1.0476	-1.6707	-0.542256	-0.56535	-0.363248	-0.889357
comp4281_c0_seq1	comp4281_c0_seq1 len=450 path=[0:0-449]	1.04059e-05	8.77814e-06	1.55056e-05	1.48071e-05	1.12409e-05	1.40604e-05	1.88315e-05	1.8163e-05	1.99266e-05	1.91543e-05	1.6275e-05	1.5789e-05	1.80969	2.06911	1.28512	1.29359	1.44783	1.12294	-0.552579	-0.483299	-0.778138	-0.773043	-0.690688	-0.890517
comp11279_c0_seq1	comp11279_c0_seq1 len=342 path=[0:0-341] : tr|F2D8E8|F2D8E8_HORVD Predicted protein OS=Hordeum vulgare var. distichum PE=2 SV=1 e-value: 4e-09 blast score: 61.2	2.83798e-06	2.74317e-06	4.53824e-06	4.20655e-06	4.33661e-06	3.62494e-06	4.8913e-06	3.66076e-06	2.28326e-06	3.49355e-06	4.13656e-06	4.14796e-06	1.72352	1.3345	0.503115	0.830501	0.95387	1.14428	-0.580208	-0.749345	-1.98762	-1.20409	-1.04836	-0.873909
comp4187_c0_seq1	comp4187_c0_seq1 len=513 path=[0:0-512]	1.17461e-05	1.53008e-05	1.49384e-05	2.33884e-05	2.04848e-05	1.68615e-05	1.59783e-05	1.38686e-05	2.41818e-05	1.84315e-05	2.26494e-05	2.22117e-05	1.36031	0.9064	1.61877	0.788059	1.10567	1.3173	-0.735128	-1.10327	-0.617753	-1.26894	-0.90443	-0.759127
comp9436_c0_seq1	comp9436_c0_seq1 len=410 path=[0:0-409] : tr|F1DTB8|F1DTB8_WHEAT Lipoxygenase OS=Triticum aestivum GN=LOX3 PE=2 SV=1 e-value: 4e-05 blast score: 47.8	2.60148e-06	4.14523e-06	5.10552e-06	5.72091e-06	4.22249e-06	3.73479e-06	5.13587e-06	3.80155e-06	5.18922e-06	5.30055e-06	5.08593e-06	5.82053e-06	1.97421	0.91709	1.01639	0.926522	1.20449	1.55846	-0.506531	-1.09041	-0.98387	-1.07931	-0.830228	-0.641658
comp38902_c0_seq1	comp38902_c0_seq1 len=295 path=[0:0-294] : tr|B8BAD8|B8BAD8_ORYSI Putative uncharacterized protein OS=Oryza sativa subsp. indica GN=OsI_27640 PE=4 SV=1 e-value: 2e-15 blast score: 82.0	3.94163e-07	1.82878e-07	1.89093e-06	2.35567e-06	1.42652e-06	3.2954e-07	1.05978e-06	1.47838e-06	4.15138e-07	7.22803e-07	2.7125e-07	8.69734e-07	2.68869	8.08398	0.219541	0.306835	0.190149	2.63923	-0.371928	-0.123701	-4.55495	-3.25908	-5.25905	-0.378898
comp25358_c0_seq1	comp25358_c0_seq1 len=180 path=[0:0-179]	2.36498e-07	1.82878e-07	3.78187e-07	1.68262e-07	1.71182e-07	1.09847e-07	4.8913e-07	5.63193e-07	1.55677e-07	2.40934e-07	6.78124e-08	2.00708e-07	2.06822	3.07961	0.41164	1.4319	0.396143	1.82716	-0.483507	-0.324716	-2.42931	-0.698374	-2.52434	-0.547297
comp17124_c0_seq1	comp17124_c0_seq1 len=304 path=[0:0-303]	1.49782e-06	5.48634e-07	2.08003e-06	1.51436e-06	3.13833e-06	3.18556e-06	1.63043e-07	2.81597e-07	0	0	1.35625e-07	0	0.108854	0.513269	0	0	0.0432156	0	-9.18663	-1.9483	0	0	-23.1398	0
comp12644_c0_seq1	comp12644_c0_seq1 len=284 path=[0:0-283]	2.12848e-06	2.37741e-06	3.59277e-06	4.71134e-06	4.50779e-06	3.40525e-06	3.09783e-06	2.53437e-06	2.6984e-06	4.45728e-06	3.39062e-06	3.07752e-06	1.45542	1.06602	0.751062	0.946075	0.75217	0.903758	-0.687089	-0.938069	-1.33145	-1.057	-1.32949	-1.10649
comp15321_c0_seq1	comp15321_c0_seq1 len=436 path=[0:0-435]	1.57665e-06	1.76782e-06	2.45821e-06	4.26264e-06	2.56773e-06	4.06433e-06	3.17935e-06	3.44956e-06	3.26921e-06	4.09588e-06	6.64562e-06	5.0846e-06	2.01652	1.95131	1.32991	0.960879	2.58813	1.25103	-0.495905	-0.512477	-0.751929	-1.04071	-0.386379	-0.799341
CA636003	CA636003 similar to UniRef100_Q10MY1 Cluster: Auxin responsive protein; n=2; Oryza sativa|Rep: Auxin responsive protein - Oryza sativa subsp. japonica (Rice), partial (24%)	0	6.09593e-08	0	0	5.70606e-08	5.49234e-08	8.15217e-08	0	5.18922e-08	0	6.78124e-08	2.00708e-07	0	0	0	0	1.18843	3.65432	0	0	0	0	-0.841447	-0.273648
comp17604_c0_seq1	comp17604_c0_seq1 len=357 path=[0:0-356]	2.36498e-06	1.58494e-06	1.32365e-06	3.47742e-06	1.71182e-06	2.36171e-06	2.20109e-06	2.46397e-06	2.07569e-06	1.92747e-06	2.98375e-06	2.4085e-06	0.9307	1.55461	1.56815	0.554283	1.74303	1.01981	-1.07446	-0.643247	-0.637693	-1.80413	-0.573714	-0.980573
comp6509_c0_seq1	comp6509_c0_seq1 len=424 path=[0:0-423] : tr|C5YJN6|C5YJN6_SORBI Putative uncharacterized protein Sb07g028890 OS=Sorghum bicolor GN=Sb07g028890 PE=4 SV=1 e-value: 3e-06 blast score: 51.6	4.0993e-06	6.76649e-06	1.89093e-06	8.41311e-07	4.56485e-07	6.48096e-06	1.79348e-06	1.75998e-06	4.04759e-06	2.04794e-06	6.30656e-06	4.81699e-06	0.437509	0.260102	2.14053	2.43423	13.8155	0.743252	-2.28567	-3.84464	-0.467175	-0.410808	-0.0723826	-1.34544
comp14519_c0_seq1	comp14519_c0_seq1 len=568 path=[0:0-567] : tr|F2EHE3|F2EHE3_HORVD Predicted protein OS=Hordeum vulgare var. distichum PE=2 SV=1 e-value: 4e-12 blast score: 72.0	3.70513e-06	3.23084e-06	4.16005e-06	5.83309e-06	5.07839e-06	4.66849e-06	2.69022e-06	2.46397e-06	3.06164e-06	2.28887e-06	2.37344e-06	2.20779e-06	0.726078	0.76264	0.735962	0.392395	0.467359	0.472913	-1.37726	-1.31124	-1.35877	-2.54845	-2.13968	-2.11456
comp4895_c0_seq1	comp4895_c0_seq1 len=363 path=[0:0-362]	1.48994e-05	1.63371e-05	2.57167e-05	2.23789e-05	2.72179e-05	1.59827e-05	1.50815e-05	1.44318e-05	1.8318e-05	1.62631e-05	1.54612e-05	1.69933e-05	1.01223	0.883377	0.712298	0.726715	0.568054	1.06323	-0.987922	-1.13202	-1.40391	-1.37606	-1.7604	-0.940532
CA760377	CA760377 similar to UniRef100_Q8HCN9 Cluster: Ribosomal protein S4; n=1; Oryza sativa Japonica Group|Rep: Ribosomal protein S4 - Oryza sativa subsp. japonica (Rice), partial (24%)	7.88327e-08	1.21919e-07	0	5.60874e-08	5.70606e-08	5.49234e-08	1.63043e-07	0	1.55677e-07	0	2.03437e-07	6.69027e-08	2.06822	0	0	0	3.56529	1.21811	-0.483507	0	0	0	-0.280482	-0.820945
TC15947	TC15947 similar to UniRef100_A1E4D6 Cluster: Ethylene receptor isoform 1; n=1; Coffea canephora|Rep: Ethylene receptor isoform 1 - Coffea canephora (Robusta coffee), partial (91%)	0	6.09593e-08	0	0	0	0	2.44565e-07	7.03992e-08	0	0	0	0	0	1.15485	0	0	0	0	0	-0.86591	0	0	0	0
comp23133_c0_seq1	comp23133_c0_seq1 len=173 path=[0:0-172]	2.36498e-07	2.43837e-07	1.13456e-06	7.29136e-07	9.7003e-07	7.14004e-07	4.8913e-07	4.22395e-07	7.26491e-07	4.81868e-07	1.35625e-07	7.35929e-07	2.06822	1.73228	0.640329	0.660876	0.139815	1.03071	-0.483507	-0.577273	-1.5617	-1.51314	-7.1523	-0.970208
BE705158	BE705158 homologue to UniRef100_P93603 Cluster: Calmodulin TaCaM2-1; n=1; Triticum aestivum|Rep: Calmodulin TaCaM2-1 - Triticum aestivum (Wheat), partial (18%)	2.36498e-07	6.09593e-08	5.6728e-07	1.68262e-07	4.56485e-07	3.84464e-07	1.22283e-06	2.04158e-06	1.45298e-06	1.56607e-06	7.45937e-07	1.80637e-06	5.17056	33.4908	2.56131	9.30733	1.63409	4.69842	-0.193403	-0.029859	-0.390424	-0.107442	-0.611962	-0.212838
comp50124_c0_seq1	comp50124_c0_seq1 len=108 path=[0:0-107]	7.88327e-08	0	0	0	0	0	8.15217e-08	0	0	0	0	0	1.03411	0	0	0	0	0	-0.967014	0	0	0	0	0
TC386986	TC386986 homologue to UniRef100_Q43270 Cluster: Phospholipase D alpha 1; n=1; Zea mays|Rep: Phospholipase D alpha 1 - Zea mays (Maize), partial (44%) #or# TC456212 similar to UniRef100_Q18LC1 Cluster: Phospholipase D; n=1; Triticum turgidum subsp. durum|Rep: Phospholipase D - Triticum turgidum subsp. durum (durum wheat), partial (33%)	1.34016e-06	1.09727e-06	1.32365e-06	1.29001e-06	1.02709e-06	1.04354e-06	2.36413e-06	1.83038e-06	1.40109e-06	2.04794e-06	7.45937e-07	7.35929e-07	1.76407	1.66812	1.0585	1.58754	0.726262	0.70522	-0.56687	-0.599476	-0.944731	-0.629906	-1.37691	-1.418
TC369925	TC369925 weakly similar to UniRef100_A7QFP1 Cluster: Chromosome chr8 scaffold_88, whole genome shotgun sequence; n=1; Vitis vinifera|Rep: Chromosome chr8 scaffold_88, whole genome shotgun sequence - Vitis vinifera (Grape), partial (52%) #or# TC378794 similar to UniRef100_A7QFP1 Cluster: Chromosome chr8 scaffold_88, whole genome shotgun sequence; n=1; Vitis vinifera|Rep: Chromosome chr8 scaffold_8…	3.6263e-06	3.23084e-06	2.8364e-06	3.47742e-06	3.36658e-06	2.80109e-06	3.0163e-06	3.16796e-06	2.0238e-06	2.77074e-06	1.55969e-06	3.14442e-06	0.831785	0.980537	0.713509	0.796782	0.463286	1.12257	-1.20223	-1.01985	-1.40152	-1.25505	-2.1585	-0.890813
BG368087	BG368087 similar to UniRef100_Q37247 Cluster: Ribulose bisphosphate carboxylase large chain; n=1; Oryza sativa|Rep: Ribulose bisphosphate carboxylase large chain - Oryza sativa (Rice), partial (28%) #or# BI951042 similar to UniRef100_P05698 Cluster: Ribulose bisphosphate carboxylase large chain precursor; n=3; Hordeum vulgare|Rep: Ribulose bisphosphate carboxylase large chain precursor - Hordeum …	7.88327e-08	1.82878e-07	0	5.60874e-08	1.14121e-07	5.49234e-08	1.63043e-07	7.03992e-08	5.18922e-08	1.20467e-07	2.03437e-07	2.67611e-07	2.06822	0.384951	0	2.14785	1.78264	4.87243	-0.483507	-2.59773	0	-0.465583	-0.560965	-0.205236
comp12876_c0_seq1	comp12876_c0_seq1 len=363 path=[0:0-362] : tr|F2DVK1|F2DVK1_HORVD Predicted protein (Fragment) OS=Hordeum vulgare var. distichum PE=2 SV=1 e-value: 4e-06 blast score: 51.2	1.49782e-06	2.37741e-06	3.97096e-06	2.69219e-06	2.91009e-06	2.96586e-06	2.93478e-06	2.53437e-06	2.17947e-06	1.92747e-06	2.03437e-06	2.4754e-06	1.95937	1.06602	0.548853	0.715949	0.699076	0.83463	-0.510368	-0.938069	-1.82198	-1.39675	-1.43046	-1.19814
TC424109	TC424109 similar to UniRef100_A7P1J6 Cluster: Chromosome chr19 scaffold_4, whole genome shotgun sequence; n=1; Vitis vinifera|Rep: Chromosome chr19 scaffold_4, whole genome shotgun sequence - Vitis vinifera (Grape), partial (76%)	1.57665e-07	3.65756e-07	3.78187e-07	4.48699e-07	3.42364e-07	2.74617e-07	3.26087e-07	4.92794e-07	2.59461e-07	4.81868e-07	6.78124e-08	2.67611e-07	2.06822	1.34733	0.686067	1.07392	0.198071	0.974487	-0.483507	-0.742209	-1.45758	-0.931165	-5.04868	-1.02618
comp2868_c0_seq1	comp2868_c0_seq1 len=527 path=[0:0-526] : tr|C5WTN6|C5WTN6_SORBI Putative uncharacterized protein Sb01g043220 OS=Sorghum bicolor GN=Sb01g043220 PE=3 SV=1 e-value: 6e-04 blast score: 44.7	1.75797e-05	1.70686e-05	2.08003e-05	2.90533e-05	2.41366e-05	2.30129e-05	2.47011e-05	2.04158e-05	2.02899e-05	2.31297e-05	1.34947e-05	2.37504e-05	1.40509	1.1961	0.975462	0.796113	0.559095	1.03205	-0.711697	-0.836051	-1.02516	-1.2561	-1.7886	-0.968947
BI949378	BI949378 homologue to UniRef100_O24561 Cluster: Chlorophyll a/b-binding protein CP29 precursor; n=1; Zea mays|Rep: Chlorophyll a/b-binding protein CP29 precursor - Zea mays (Maize), partial (32%) #or# TC240751 similar to UniRef100_O24561 Cluster: Chlorophyll a/b-binding protein CP29 precursor; n=1; Zea mays|Rep: Chlorophyll a/b-binding protein CP29 precursor - Zea mays (Maize), partial (98%) #or#…	0.000270396	0.000268953	0.000180773	0.00015138	0.000171867	0.000223923	0.000200707	0.000250339	0.000162423	0.000217443	0.00018384	0.00016244	0.742269	0.930794	0.898489	1.43641	1.06966	0.725427	-1.34722	-1.07435	-1.11298	-0.696182	-0.934873	-1.3785
CA636477	CA636477	0	6.09593e-08	1.89093e-07	1.12175e-07	2.28242e-07	5.49234e-08	1.63043e-07	7.03992e-08	3.63246e-07	1.20467e-07	0	1.33805e-07	0	1.15485	1.92099	1.07392	0	2.43622	0	-0.86591	-0.520566	-0.931165	0	-0.410473
comp35155_c0_seq1	comp35155_c0_seq1 len=123 path=[0:0-122]	1.57665e-07	6.09593e-08	0	2.2435e-07	2.28242e-07	1.6477e-07	1.63043e-07	2.11197e-07	5.18922e-08	0	6.78124e-08	1.33805e-07	1.03411	3.46456	0	0	0.297107	0.812072	-0.967014	-0.288637	0	0	-3.36579	-1.23142
comp4528_c0_seq1	comp4528_c0_seq1 len=621 path=[0:0-620] : tr|F2CS17|F2CS17_HORVD Predicted protein OS=Hordeum vulgare var. distichum PE=2 SV=1 e-value: 2e-04 blast score: 47.0	1.26132e-05	1.44474e-05	1.05892e-05	1.5424e-05	1.75176e-05	1.54335e-05	9.53804e-06	7.67351e-06	1.04822e-05	9.39643e-06	1.34269e-05	1.13735e-05	0.756194	0.531136	0.989896	0.609207	0.766478	0.736934	-1.32241	-1.88276	-1.01021	-1.64148	-1.30467	-1.35697
CA660292	CA660292 similar to UniRef100_A7P2W0 Cluster: Chromosome chr1 scaffold_5, whole genome shotgun sequence; n=1; Vitis vinifera|Rep: Chromosome chr1 scaffold_5, whole genome shotgun sequence - Vitis vinifera (Grape), partial (20%) #or# CV781099 similar to UniRef100_A7P2W0 Cluster: Chromosome chr1 scaffold_5, whole genome shotgun sequence; n=1; Vitis vinifera|Rep: Chromosome chr1 scaffold_5, whole ge…	4.72996e-07	6.09593e-07	0	3.92612e-07	3.42364e-07	3.84464e-07	4.07609e-07	3.51996e-07	3.63246e-07	0	2.7125e-07	2.67611e-07	0.861759	0.577427	0	0	0.792286	0.696062	-1.16042	-1.73182	0	0	-1.26217	-1.43665
TC244755	TC244755 homologue to UniRef100_Q5ZDA1 Cluster: BCS1 protein-like; n=1; Oryza sativa Japonica Group|Rep: BCS1 protein-like - Oryza sativa subsp. japonica (Rice), partial (62%)	0	0	1.89093e-07	2.80437e-07	5.13545e-07	2.19694e-07	2.44565e-07	2.11197e-07	8.30275e-07	1.20467e-07	3.39062e-07	3.34513e-07	0	0	4.39083	0.429569	0.660238	1.52264	0	0	-0.227748	-2.32791	-1.51461	-0.656756
TC424094	TC424094 similar to UniRef100_A2Q5P6 Cluster: Protein phosphatase inhibitor; n=1; Medicago truncatula|Rep: Protein phosphatase inhibitor - Medicago truncatula (Barrel medic), partial (33%)	6.70078e-06	6.40073e-06	9.45466e-06	9.03007e-06	9.07264e-06	5.54726e-06	8.80435e-06	8.5887e-06	1.24541e-05	7.46896e-06	6.78124e-06	8.29593e-06	1.31393	1.34183	1.31725	0.827121	0.747439	1.4955	-0.761076	-0.74525	-0.759159	-1.20901	-1.3379	-0.668673
comp12525_c0_seq1	comp12525_c0_seq1 len=559 path=[0:0-558] : tr|B6TK82|B6TK82_MAIZE Putative uncharacterized protein OS=Zea mays PE=2 SV=1 e-value: 9e-04 blast score: 44.3	3.07447e-06	2.74317e-06	1.13456e-06	4.48699e-07	7.98849e-07	2.03217e-06	1.30435e-06	2.18237e-06	2.75029e-06	3.61401e-07	2.37344e-06	1.94018e-06	0.424251	0.795566	2.4241	0.805442	2.97107	0.954733	-2.3571	-1.25697	-0.412524	-1.24155	-0.336579	-1.04741
comp9231_c0_seq1	comp9231_c0_seq1 len=377 path=[0:0-376]	3.6263e-06	3.10893e-06	3.78187e-06	4.54308e-06	4.16542e-06	4.00941e-06	2.6087e-06	3.09756e-06	2.28326e-06	3.01168e-06	2.57687e-06	3.27823e-06	0.719382	0.996345	0.603739	0.662915	0.618634	0.817634	-1.39008	-1.00367	-1.65635	-1.50849	-1.61646	-1.22304
TC458417	TC458417 homologue to UniRef100_Q36271 Cluster: ATPase subunit 6; n=1; Zea mays|Rep: ATPase subunit 6 - Zea mays (Maize), complete	7.88327e-08	0	0	1.12175e-07	1.71182e-07	1.6477e-07	2.44565e-07	7.03992e-08	3.63246e-07	2.40934e-07	4.06875e-07	2.67611e-07	3.10233	0	0	2.14785	2.37686	1.62414	-0.322338	0	0	-0.465583	-0.420724	-0.615709
comp43942_c0_seq1	comp43942_c0_seq1 len=198 path=[0:0-197]	7.88327e-08	1.21919e-07	0	0	0	0	8.15217e-08	0	0	0	0	0	1.03411	0	0	0	0	0	-0.967014	0	0	0	0	0
CJ560521	CJ560521 similar to UniRef100_UPI000034F013 Cluster: bile acid:sodium symporter; n=1; Arabidopsis thaliana|Rep: bile acid:sodium symporter - Arabidopsis thaliana, partial (23%)	1.02482e-06	8.53431e-07	1.70184e-06	1.51436e-06	1.82594e-06	1.09847e-06	1.38587e-06	1.54878e-06	8.82168e-07	9.63737e-07	1.35625e-06	1.40496e-06	1.3523	1.81477	0.518361	0.636399	0.742768	1.27901	-0.739481	-0.551034	-1.92916	-1.57134	-1.34632	-0.781853
comp12786_c0_seq1	comp12786_c0_seq1 len=322 path=[0:0-321]	5.91245e-06	6.46169e-06	9.45466e-06	1.32927e-05	1.00427e-05	1.01608e-05	1.10054e-05	9.36309e-06	7.62816e-06	8.67363e-06	7.18812e-06	9.90159e-06	1.8614	1.44902	0.806814	0.65251	0.715758	0.974487	-0.53723	-0.690124	-1.23944	-1.53254	-1.39712	-1.02618
CA592804	CA592804 similar to UniRef100_P0C1M0 Cluster: ATP synthase subunit gamma, chloroplast precursor (EC 3.6.3.14) [Contains: Inceptin]; n=1; Zea mays|Rep: ATP synthase subunit gamma, chloroplast precursor (EC 3.6.3.14) [Contains: Inceptin] - Zea mays (Maize), partial (30%)	7.88327e-08	3.04797e-07	1.89093e-07	2.2435e-07	3.42364e-07	2.19694e-07	2.44565e-07	2.11197e-07	1.03784e-07	0	2.7125e-07	6.69027e-08	3.10233	0.692913	0.548853	0	0.792286	0.304527	-0.322338	-1.44318	-1.82198	0	-1.26217	-3.28378
comp37032_c0_seq1	comp37032_c0_seq1 len=148 path=[0:0-147]	7.88327e-08	1.21919e-07	0	0	1.14121e-07	0	1.63043e-07	7.03992e-08	5.18922e-08	1.20467e-07	0	0	2.06822	0.577427	0	0	0	0	-0.483507	-1.73182	0	0	0	0
comp7314_c0_seq1	comp7314_c0_seq1 len=258 path=[0:0-257]	5.67595e-06	7.43704e-06	8.13101e-06	9.81529e-06	8.67321e-06	8.29343e-06	8.15217e-06	6.61752e-06	8.19897e-06	6.74616e-06	7.25593e-06	7.89451e-06	1.43627	0.889806	1.00836	0.687311	0.836591	0.951899	-0.69625	-1.12384	-0.991711	-1.45495	-1.19533	-1.05053
TC390549	TC390549 similar to UniRef100_A3RX90 Cluster: Sensor protein; n=1; Ralstonia solanacearum UW551|Rep: Sensor protein - Ralstonia solanacearum UW551, partial (3%)	5.51829e-07	6.09593e-07	3.78187e-07	6.16961e-07	6.84727e-07	7.14004e-07	4.8913e-07	1.40798e-07	6.22707e-07	3.61401e-07	8.81562e-07	4.68319e-07	0.886381	0.230971	1.64656	0.585776	1.28746	0.655904	-1.12818	-4.32955	-0.607327	-1.70714	-0.776721	-1.52461
CD931473	CD931473	0	1.21919e-07	0	5.60874e-08	5.70606e-08	5.49234e-08	0	1.40798e-07	5.18922e-08	0	2.03437e-07	1.33805e-07	0	1.15485	0	0	3.56529	2.43622	0	-0.86591	0	0	-0.280482	-0.410473
comp561_c0_seq1	comp561_c0_seq1 len=368 path=[0:0-367] : tr|A2XVK6|A2XVK6_ORYSI Putative uncharacterized protein OS=Oryza sativa subsp. indica GN=OsI_16665 PE=4 SV=1 e-value: 3e-14 blast score: 78.2	7.56794e-05	8.73547e-05	5.76734e-05	4.26264e-05	5.12404e-05	0.000113417	4.1087e-05	5.40666e-05	0.000115512	7.8665e-05	0.000109856	9.46003e-05	0.542908	0.618931	2.00286	1.84545	2.14394	0.834094	-1.84193	-1.61569	-0.499285	-0.541873	-0.466432	-1.19891
comp6555_c0_seq2	comp6555_c0_seq2 len=363 path=[0:0-213 214:214-362]	2.52265e-06	3.96236e-06	3.02549e-06	4.4309e-06	3.13833e-06	2.25186e-06	3.26087e-06	2.53437e-06	3.78813e-06	4.69822e-06	2.64469e-06	2.80991e-06	1.29264	0.639612	1.25207	1.06033	0.842704	1.24782	-0.773611	-1.56345	-0.798677	-0.943103	-1.18666	-0.801399
comp19866_c0_seq1	comp19866_c0_seq1 len=246 path=[0:0-245]	9.45992e-07	7.31512e-07	1.13456e-06	4.48699e-07	3.42364e-07	4.39387e-07	1.05978e-06	5.63193e-07	2.59461e-07	6.02335e-07	7.45937e-07	8.69734e-07	1.12029	0.769903	0.228689	1.3424	2.17879	1.97943	-0.892628	-1.29886	-4.37275	-0.744932	-0.458971	-0.505197
comp9412_c0_seq1	comp9412_c0_seq1 len=263 path=[0:0-262]	2.99564e-06	3.16989e-06	3.40368e-06	5.04787e-06	2.68185e-06	4.4488e-06	6.03261e-06	6.40632e-06	4.35895e-06	3.49355e-06	2.84812e-06	3.34513e-06	2.0138	2.021	1.28066	0.692084	1.062	0.751919	-0.496575	-0.494806	-0.780849	-1.44491	-0.94162	-1.32993
comp17419_c0_seq1	comp17419_c0_seq1 len=411 path=[0:0-410]	1.89198e-06	2.86509e-06	3.97096e-06	4.03829e-06	3.766e-06	2.96586e-06	7.09239e-06	7.25111e-06	6.12328e-06	5.18009e-06	4.40781e-06	6.35575e-06	3.74865	2.53085	1.54202	1.28274	1.17042	2.14297	-0.266762	-0.395124	-0.648502	-0.77958	-0.854393	-0.466643
TC270442	TC270442 similar to UniRef100_Q5SMN3 Cluster: Non-phototropic hypocotyl 3-like; n=1; Oryza sativa Japonica Group|Rep: Non-phototropic hypocotyl 3-like - Oryza sativa subsp. japonica (Rice), partial (4%)	1.57665e-07	6.09593e-08	1.89093e-07	0	1.14121e-07	5.49234e-08	8.15217e-08	7.03992e-08	2.07569e-07	0	0	0	0.517056	1.15485	1.09771	0	0	0	-1.93403	-0.86591	-0.91099	0	0	0
CK157115	CK157115 #or# TC370095 weakly similar to UniRef100_A7PMY5 Cluster: Chromosome chr14 scaffold_21, whole genome shotgun sequence; n=1; Vitis vinifera|Rep: Chromosome chr14 scaffold_21, whole genome shotgun sequence - Vitis vinifera (Grape), partial (42%) #or# TC430173	7.88327e-08	3.65756e-07	3.78187e-07	3.36524e-07	4.56485e-07	3.2954e-07	4.8913e-07	8.4479e-07	1.03784e-07	4.81868e-07	1.35625e-07	4.68319e-07	6.20467	2.30971	0.274427	1.4319	0.297107	1.42113	-0.161169	-0.432955	-3.64396	-0.698374	-3.36579	-0.703667
FC920940	FC920940 similar to UniRef100_A7Q692 Cluster: Chromosome chr11 scaffold_56, whole genome shotgun sequence; n=1; Vitis vinifera|Rep: Chromosome chr11 scaffold_56, whole genome shotgun sequence - Vitis vinifera (Grape), partial (42%)	7.88327e-08	0	0	0	0	0	8.15217e-08	7.03992e-08	0	0	0	0	1.03411	0	0	0	0	0	-0.967014	0	0	0	0	0
TC457848	TC457848 similar to UniRef100_Q0JGJ5 Cluster: Os01g0920300 protein; n=2; Oryza sativa Japonica Group|Rep: Os01g0920300 protein - Oryza sativa subsp. japonica (Rice), partial (50%)	1.26132e-06	2.74317e-06	1.70184e-06	7.29136e-07	1.31239e-06	1.97724e-06	2.36413e-06	2.81597e-06	8.82168e-07	4.81868e-07	1.96656e-06	2.00708e-06	1.87433	1.02654	0.518361	0.660876	1.49845	1.01509	-0.533525	-0.974149	-1.92916	-1.51314	-0.667355	-0.985134
comp3090_c0_seq1	comp3090_c0_seq1 len=371 path=[0:0-370]	1.63972e-05	1.0546e-05	1.89093e-05	2.45102e-05	2.60767e-05	1.66418e-05	2.8288e-05	1.84446e-05	3.43526e-05	1.81905e-05	1.31556e-05	2.08067e-05	1.72518	1.74897	1.8167	0.742162	0.504497	1.25027	-0.579651	-0.571765	-0.550447	-1.34741	-1.98217	-0.799828
comp6302_c0_seq1	comp6302_c0_seq1 len=428 path=[0:0-427]	6.84267e-05	7.73574e-05	5.21897e-05	4.52625e-05	5.10122e-05	6.22282e-05	6.5788e-05	6.85688e-05	4.43678e-05	4.37296e-05	6.16415e-05	5.81384e-05	0.961438	0.886389	0.850126	0.966132	1.20837	0.934277	-1.04011	-1.12817	-1.1763	-1.03506	-0.827562	-1.07035
comp851_c0_seq1	comp851_c0_seq1 len=413 path=[0:0-412]	7.3472e-05	7.66868e-05	5.52152e-05	2.5015e-05	3.84589e-05	2.50451e-05	0.000123179	0.000109682	4.64954e-05	3.37308e-05	3.09225e-05	6.48956e-05	1.67655	1.43026	0.842076	1.34842	0.804041	2.59115	-0.596464	-0.699175	-1.18754	-0.741607	-1.24372	-0.385929
comp10027_c0_seq1	comp10027_c0_seq1 len=265 path=[0:0-264]	4.25696e-06	4.08428e-06	6.24008e-06	8.41311e-06	9.18676e-06	4.39387e-06	6.03261e-06	5.35034e-06	6.48653e-06	5.30055e-06	5.69625e-06	6.48956e-06	1.41712	1.30998	1.03949	0.630035	0.62005	1.47696	-0.705659	-0.763368	-0.962006	-1.58721	-1.61277	-0.677068
TC403217	TC403217 similar to UniRef100_A7QZE3 Cluster: Chromosome chr16 scaffold_271, whole genome shotgun sequence; n=1; Vitis vinifera|Rep: Chromosome chr16 scaffold_271, whole genome shotgun sequence - Vitis vinifera (Grape), partial (64%)	0	0	0	5.60874e-08	0	0	0	0	0	1.20467e-07	6.78124e-08	0	0	0	0	2.14785	0	0	0	0	0	-0.465583	0	0
comp1902_c0_seq1	comp1902_c0_seq1 len=345 path=[0:0-344]	4.79303e-05	4.72435e-05	3.06331e-05	7.39232e-05	5.80877e-05	6.08551e-05	6.43207e-05	4.85754e-05	4.1877e-05	3.56583e-05	4.35356e-05	5.19165e-05	1.34196	1.02819	1.36705	0.482369	0.74948	0.853115	-0.745177	-0.97258	-0.731502	-2.0731	-1.33426	-1.17217
comp848_c0_seq1	comp848_c0_seq1 len=645 path=[0:0-644] : tr|F2DLN9|F2DLN9_HORVD Predicted protein OS=Hordeum vulgare var. distichum PE=2 SV=1 e-value: 7e-41 blast score: 167	7.8675e-05	7.55896e-05	5.65389e-05	6.05183e-05	6.71603e-05	6.87641e-05	7.54891e-05	7.19479e-05	6.89648e-05	7.83036e-05	7.53396e-05	7.4931e-05	0.959506	0.951824	1.21978	1.29388	1.12179	1.08968	-1.0422	-1.05061	-0.819823	-0.772867	-0.891434	-0.917699
comp27550_c0_seq1	comp27550_c0_seq1 len=191 path=[0:0-190]	2.36498e-07	1.82878e-07	0	0	0	0	4.8913e-07	2.11197e-07	0	0	0	0	2.06822	1.15485	0	0	0	0	-0.483507	-0.86591	0	0	0	0
comp15508_c0_seq1	comp15508_c0_seq1 len=175 path=[0:0-174]	7.88327e-08	0	0	0	0	5.49234e-08	0	0	0	0	0	6.69027e-08	0	0	0	0	0	1.21811	0	0	0	0	0	-0.820945
comp22035_c0_seq1	comp22035_c0_seq1 len=112 path=[0:0-111]	3.94163e-07	2.43837e-07	1.89093e-07	2.80437e-07	1.14121e-07	1.6477e-07	3.26087e-07	1.40798e-07	5.18922e-07	3.61401e-07	2.7125e-07	2.67611e-07	0.827289	0.577427	2.74427	1.28871	2.37686	1.62414	-1.20877	-1.73182	-0.364396	-0.775971	-0.420724	-0.615709
comp6313_c0_seq1	comp6313_c0_seq1 len=359 path=[0:0-181 182:182-185 186:186-358] : tr|B9FAW7|B9FAW7_ORYSJ Putative uncharacterized protein OS=Oryza sativa subsp. japonica GN=OsJ_09271 PE=4 SV=1 e-value: 1e-13 blast score: 75.9	6.22778e-06	6.21785e-06	6.80736e-06	7.29136e-06	7.2467e-06	6.86543e-06	9.21196e-06	5.84313e-06	8.30275e-06	5.18009e-06	7.25593e-06	8.16212e-06	1.47917	0.939735	1.21967	0.710441	1.00127	1.18887	-0.676054	-1.06413	-0.819891	-1.40758	-0.998727	-0.841132
comp16963_c0_seq1	comp16963_c0_seq1 len=209 path=[2:0-208]	4.02047e-06	3.65756e-06	4.91642e-06	5.10395e-06	3.42364e-06	5.32757e-06	4.97283e-06	4.29435e-06	4.30705e-06	5.05962e-06	3.255e-06	4.01416e-06	1.23688	1.1741	0.876054	0.991314	0.950743	0.753469	-0.808487	-0.851715	-1.14148	-1.00876	-1.05181	-1.32719
comp48121_c0_seq1	comp48121_c0_seq1 len=112 path=[0:0-111]	7.88327e-08	0	0	5.60874e-08	0	0	8.15217e-08	0	0	0	0	0	1.03411	0	0	0	0	0	-0.967014	0	0	0	0	0
CD938053	CD938053 weakly similar to UniRef100_A7EEY9 Cluster: Predicted protein; n=1; Sclerotinia sclerotiorum 1980|Rep: Predicted protein - Sclerotinia sclerotiorum (strain ATCC 18683 / 1980 / Ss-1) (Whitemold) (Whetzelinia sclerotiorum), partial (7%)	1.49782e-06	1.70686e-06	2.08003e-06	2.69219e-06	1.76888e-06	2.74617e-06	2.28261e-06	2.88637e-06	2.17947e-06	1.92747e-06	1.69531e-06	2.67611e-06	1.52395	1.69104	1.04781	0.715949	0.95841	0.974487	-0.656188	-0.591353	-0.954371	-1.39675	-1.04339	-1.02618
TC391077	TC391077 homologue to UniRef100_A2XAZ3 Cluster: Alcohol dehydrogenase class-3 (Alcohol dehydrogenase class-III) (S-(hydroxymethyl)glutathione dehydrogenase); n=1; Oryza sativa Indica Group|Rep: Alcohol dehydrogenase class-3 (Alcohol dehydrogenase class-III) (S-(hydroxymethyl)glutathione dehydrogenase) - Oryza sativa subsp. indica (Rice), partial (43%) #or# TC429159 homologue to UniRef100_A2XAZ3 C…	9.45992e-07	1.09727e-06	7.56373e-07	9.53486e-07	9.1297e-07	8.78775e-07	7.33696e-07	1.26718e-06	8.30275e-07	4.81868e-07	4.74687e-07	1.07044e-06	0.775583	1.15485	1.09771	0.505376	0.519937	1.21811	-1.28935	-0.86591	-0.91099	-1.97873	-1.92331	-0.820945
comp5574_c0_seq1	comp5574_c0_seq1 len=383 path=[0:0-382] : tr|F2D5L4|F2D5L4_HORVD Predicted protein OS=Hordeum vulgare var. distichum PE=2 SV=1 e-value: 8e-22 blast score: 103	4.72208e-05	4.44394e-05	5.97535e-05	6.91558e-05	5.92289e-05	5.47037e-05	6.52989e-05	5.99097e-05	5.06468e-05	4.9271e-05	4.47562e-05	5.01101e-05	1.38284	1.34812	0.847596	0.712465	0.755648	0.916027	-0.723148	-0.741772	-1.17981	-1.40358	-1.32337	-1.09167
BY873797	BY873797 similar to UniRef100_Q2QCX6 Cluster: Sterol-C5-desaturase DWF7; n=1; Gossypium hirsutum|Rep: Sterol-C5-desaturase DWF7 - Gossypium hirsutum (Upland cotton) (Gossypium mexicanum), partial (49%)	7.88327e-08	6.09593e-08	0	5.60874e-08	5.70606e-08	0	8.15217e-08	7.03992e-08	5.18922e-08	0	0	0	1.03411	1.15485	0	0	0	0	-0.967014	-0.86591	0	0	0	0
comp22301_c0_seq1	comp22301_c0_seq1 len=237 path=[0:0-236]	7.88327e-07	6.09593e-07	0	0	0	0	8.96739e-07	3.51996e-07	0	0	0	0	1.13752	0.577427	0	0	0	0	-0.879104	-1.73182	0	0	0	0
comp22041_c0_seq1	comp22041_c0_seq1 len=264 path=[0:0-263]	2.36498e-07	7.31512e-07	1.89093e-07	1.00957e-06	6.84727e-07	7.68928e-07	5.70652e-07	7.03992e-07	9.3406e-07	1.0842e-06	1.15281e-06	3.34513e-07	2.41293	0.962379	4.93968	1.07392	1.68361	0.435039	-0.414435	-1.03909	-0.202442	-0.931165	-0.593963	-2.29865
comp26879_c0_seq1	comp26879_c0_seq1 len=256 path=[0:0-255]	3.15331e-07	3.04797e-07	3.78187e-07	5.04787e-07	6.27667e-07	4.94311e-07	4.07609e-07	3.51996e-07	6.74599e-07	2.40934e-07	4.74687e-07	6.69027e-07	1.29264	1.15485	1.78377	0.477299	0.756273	1.35345	-0.773611	-0.86591	-0.560609	-2.09512	-1.32227	-0.738851
TC371835	TC371835 #or# TC377510 #or# TC422211 similar to UniRef100_Q6I681 Cluster: Cytochrome b561; n=1; Zea mays|Rep: Cytochrome b561 - Zea mays (Maize), partial (72%) #or# TC451202 similar to UniRef100_Q6I681 Cluster: Cytochrome b561; n=1; Zea mays|Rep: Cytochrome b561 - Zea mays (Maize), partial (79%)	7.88327e-08	2.43837e-07	3.78187e-07	2.2435e-07	4.56485e-07	1.6477e-07	4.07609e-07	3.51996e-07	1.55677e-07	2.40934e-07	6.78124e-08	3.34513e-07	5.17056	1.44357	0.41164	1.07392	0.148554	2.03018	-0.193403	-0.692728	-2.42931	-0.931165	-6.73158	-0.492567
TC369773	TC369773 #or# TC373800 #or# TC414026	7.88327e-08	6.09593e-08	0	1.12175e-07	5.70606e-08	2.19694e-07	8.15217e-08	0	0	1.20467e-07	6.78124e-08	6.69027e-08	1.03411	0	0	1.07392	1.18843	0.304527	-0.967014	0	0	-0.931165	-0.841447	-3.28378
comp6558_c0_seq1	comp6558_c0_seq1 len=448 path=[0:0-447]	8.51393e-06	8.22951e-06	8.69829e-06	1.1554e-05	9.52912e-06	1.08748e-05	1.01087e-05	8.4479e-06	1.00152e-05	8.0713e-06	9.62937e-06	1.06375e-05	1.18731	1.02654	1.1514	0.698571	1.01052	0.978178	-0.842238	-0.974149	-0.868509	-1.43149	-0.98959	-1.02231
comp26404_c0_seq1	comp26404_c0_seq1 len=138 path=[0:0-137]	2.36498e-07	1.82878e-07	1.89093e-07	5.60874e-08	2.28242e-07	5.49234e-08	8.15217e-08	0	0	0	6.78124e-08	6.69027e-08	0.344704	0	0	0	0.297107	1.21811	-2.90104	0	0	0	-3.36579	-0.820945
comp18650_c0_seq1	comp18650_c0_seq1 len=123 path=[0:0-122]	3.94163e-07	3.04797e-07	7.56373e-07	5.04787e-07	1.71182e-07	3.84464e-07	8.15217e-08	7.03992e-08	5.18922e-08	0	0	0	0.206822	0.230971	0.0686067	0	0	0	-4.83507	-4.32955	-14.5758	0	0	0
comp1823_c0_seq1	comp1823_c0_seq1 len=391 path=[0:0-390]	5.7469e-05	6.38244e-05	3.30913e-05	3.69055e-05	4.43932e-05	6.24479e-05	4.52446e-05	5.27994e-05	9.44438e-05	5.64991e-05	0.000116637	9.83469e-05	0.787286	0.82726	2.85404	1.53091	2.62737	1.57486	-1.27019	-1.20881	-0.350381	-0.653206	-0.380608	-0.634976
comp617_c0_seq1	comp617_c0_seq1 len=661 path=[0:0-660] : tr|F2E8X1|F2E8X1_HORVD Predicted protein OS=Hordeum vulgare var. distichum PE=2 SV=1 e-value: 1e-14 blast score: 80.9	7.8202e-05	7.52238e-05	0.000154867	0.000147622	0.000138429	9.1063e-05	0.000124728	0.000106725	9.94255e-05	0.000111432	8.40196e-05	0.00010216	1.59495	1.41877	0.642004	0.754847	0.606951	1.12186	-0.626979	-0.704837	-1.55762	-1.32477	-1.64758	-0.891373
comp418_c0_seq1	comp418_c0_seq1 len=539 path=[0:0-538] : tr|A3BTE2|A3BTE2_ORYSJ Putative uncharacterized protein OS=Oryza sativa subsp. japonica GN=OsJ_27419 PE=4 SV=1 e-value: 5e-06 blast score: 51.6	0.000194795	0.000195253	0.000312004	0.000334057	0.000366786	0.000250176	0.000238207	0.000267024	0.000285459	0.000289603	0.00029573	0.000342006	1.22285	1.36758	0.914922	0.866928	0.806275	1.36706	-0.817759	-0.731218	-1.09299	-1.1535	-1.24027	-0.731496
comp3260_c0_seq1	comp3260_c0_seq1 len=403 path=[0:0-402] : tr|F2CYQ9|F2CYQ9_HORVD Predicted protein (Fragment) OS=Hordeum vulgare var. distichum PE=2 SV=1 e-value: 4e-10 blast score: 64.3	1.3638e-05	1.45083e-05	2.25021e-05	2.23789e-05	1.72894e-05	1.55433e-05	1.72826e-05	1.70366e-05	2.03936e-05	1.99975e-05	1.48509e-05	1.53876e-05	1.26723	1.17426	0.9063	0.89359	0.858963	0.989982	-0.78912	-0.851597	-1.10339	-1.11908	-1.16419	-1.01012
comp34249_c0_seq1	comp34249_c0_seq1 len=201 path=[0:0-200]	7.88327e-08	1.82878e-07	0	0	0	0	1.63043e-07	0	0	0	0	0	2.06822	0	0	0	0	0	-0.483507	0	0	0	0	0
comp733_c0_seq1	comp733_c0_seq1 len=327 path=[0:0-326]	4.88762e-05	3.95016e-05	0.000295364	0.000242522	0.000178429	9.41936e-05	0.000103614	0.00010053	0.000133363	0.000148777	6.93721e-05	0.000120893	2.11993	2.54496	0.451521	0.613457	0.388795	1.28345	-0.471714	-0.392934	-2.21473	-1.6301	-2.57205	-0.779148
comp2161_c0_seq1	comp2161_c0_seq1 len=339 path=[0:0-338] : tr|F2D226|F2D226_HORVD Predicted protein OS=Hordeum vulgare var. distichum PE=2 SV=1 e-value: 2e-08 blast score: 58.9	0.000194244	0.000210371	0.000119885	0.000129394	0.000135062	0.000194209	0.000132228	0.000150443	0.000173839	0.000160221	0.000204522	0.000187394	0.680734	0.715133	1.45005	1.23825	1.51428	0.96491	-1.469	-1.39834	-0.689633	-0.807593	-0.66038	-1.03637
TC458395	TC458395 UniRef100_A1E241 Cluster: Delayed flowering1; n=1; Zea mays|Rep: Delayed flowering1 - Zea mays (Maize), complete	3.15331e-07	3.65756e-07	3.78187e-07	8.97398e-07	2.85303e-07	7.14004e-07	3.26087e-07	7.03992e-08	1.03784e-07	0	2.03437e-07	2.00708e-07	1.03411	0.192476	0.274427	0	0.713057	0.281102	-0.967014	-5.19546	-3.64396	0	-1.40241	-3.55743
CA632420	CA632420	1.57665e-07	1.82878e-07	1.89093e-07	1.12175e-07	1.14121e-07	2.19694e-07	8.15217e-08	1.40798e-07	3.63246e-07	1.20467e-07	6.10312e-07	2.00708e-07	0.517056	0.769903	1.92099	1.07392	5.34793	0.913581	-1.93403	-1.29886	-0.520566	-0.931165	-0.186988	-1.09459
comp7932_c0_seq1	comp7932_c0_seq1 len=366 path=[0:0-365] : tr|F2EKF1|F2EKF1_HORVD Predicted protein (Fragment) OS=Hordeum vulgare var. distichum PE=2 SV=1 e-value: 1e-06 blast score: 52.8	8.1986e-06	7.43704e-06	7.56373e-07	6.16961e-07	1.65476e-06	5.93173e-06	4.15761e-06	4.36475e-06	3.37299e-06	1.0842e-06	4.40781e-06	1.87327e-06	0.507112	0.586893	4.45943	1.75733	2.66372	0.315806	-1.97195	-1.70389	-0.224244	-0.569046	-0.375415	-3.1665
comp9420_c0_seq1	comp9420_c0_seq1 len=178 path=[0:0-177]	1.57665e-07	6.09593e-08	5.6728e-07	3.36524e-07	6.84727e-07	1.6477e-07	5.70652e-07	1.12639e-06	5.18922e-07	1.0842e-06	4.74687e-07	9.36637e-07	3.61939	18.4777	0.914755	3.22177	0.69325	5.6845	-0.27629	-0.0541194	-1.09319	-0.310388	-1.44248	-0.175917
comp789_c0_seq1	comp789_c0_seq1 len=716 path=[0:0-715]	5.17931e-05	5.58387e-05	7.63937e-05	5.35635e-05	6.12831e-05	5.20125e-05	5.25e-05	4.32955e-05	5.49539e-05	5.20418e-05	4.76722e-05	4.68988e-05	1.01365	0.775366	0.719351	0.971591	0.777901	0.901683	-0.986534	-1.28971	-1.39014	-1.02924	-1.28551	-1.10904
TC428050	TC428050 similar to UniRef100_Q69NE0 Cluster: BRI1-KD interacting protein 120; n=3; Oryza sativa Japonica Group|Rep: BRI1-KD interacting protein 120 - Oryza sativa subsp. japonica (Rice), partial (69%)	3.94163e-07	1.82878e-07	0	6.73049e-07	5.13545e-07	2.74617e-07	4.8913e-07	1.40798e-07	3.63246e-07	1.20467e-07	4.06875e-07	3.34513e-07	1.24093	0.769903	0	0.178987	0.792286	1.21811	-0.805845	-1.29886	0	-5.58699	-1.26217	-0.820945
comp3704_c0_seq1	comp3704_c0_seq1 len=516 path=[0:0-515]	3.15331e-05	3.08454e-05	6.39135e-05	6.04061e-05	6.83015e-05	3.92702e-05	5.17663e-05	5.01946e-05	3.73105e-05	4.50547e-05	3.15328e-05	3.19126e-05	1.64165	1.62729	0.583765	0.745863	0.46167	0.81264	-0.609143	-0.614517	-1.71302	-1.34073	-2.16605	-1.23056
comp13716_c0_seq1	comp13716_c0_seq1 len=385 path=[0:0-384] : tr|F2E6L9|F2E6L9_HORVD Predicted protein OS=Hordeum vulgare var. distichum PE=2 SV=1 e-value: 1e-11 blast score: 69.7	8.1986e-06	8.22951e-06	1.04001e-05	1.13857e-05	1.04421e-05	1.09298e-05	1.17391e-05	7.74391e-06	1.02747e-05	9.63737e-06	1.05787e-05	1.08382e-05	1.43185	0.940993	0.987936	0.846442	1.01309	0.991626	-0.698399	-1.06271	-1.01221	-1.18142	-0.987083	-1.00845
TC459590	TC459590 UniRef100_Q84VQ8 Cluster: ZmEBE-2 protein; n=1; Zea mays|Rep: ZmEBE-2 protein - Zea mays (Maize), complete	0	6.09593e-08	0	1.12175e-07	5.13545e-07	0	0	1.40798e-07	1.55677e-07	0	6.78124e-08	0	0	2.30971	0	0	0.132048	0	0	-0.432955	0	0	-7.57303	0
TC389335	TC389335	0	6.09593e-08	0	0	0	0	1.63043e-07	7.03992e-08	0	0	0	0	0	1.15485	0	0	0	0	0	-0.86591	0	0	0	0
CJ901541	CJ901541 similar to UniRef100_A7QJ96 Cluster: Chromosome chr8 scaffold_106, whole genome shotgun sequence; n=1; Vitis vinifera|Rep: Chromosome chr8 scaffold_106, whole genome shotgun sequence - Vitis vinifera (Grape), partial (9%) #or# GD189593 similar to UniRef100_A0PT52 Cluster: Deoxyuridine 5'-triphosphate nucleotidohydrolase; n=1; Mycobacterium ulcerans Agy99|Rep: Deoxyuridine 5'-triphosphate…	4.57229e-06	4.14523e-06	3.78187e-06	3.47742e-06	4.16542e-06	4.17418e-06	2.6087e-06	3.30876e-06	4.41084e-06	4.09588e-06	3.39062e-06	3.07752e-06	0.570544	0.798208	1.16631	1.17785	0.813992	0.737276	-1.75271	-1.25281	-0.857403	-0.849004	-1.22851	-1.35634
TC379312	TC379312 similar to UniRef100_A1EGX1 Cluster: Bowman-Birk serine proteinase inhibitor; n=1; Musa acuminata|Rep: Bowman-Birk serine proteinase inhibitor - Musa acuminata (Banana), partial (44%)	5.51829e-07	3.65756e-07	1.51275e-06	5.60874e-07	5.70606e-07	3.84464e-07	1.05978e-06	1.12639e-06	5.18922e-08	3.61401e-07	2.03437e-07	2.67611e-07	1.92049	3.07961	0.0343033	0.644354	0.356529	0.696062	-0.5207	-0.324716	-29.1517	-1.55194	-2.80482	-1.43665
comp16608_c0_seq1	comp16608_c0_seq1 len=184 path=[0:0-183]	5.51829e-07	7.31512e-07	0	0	0	0	8.96739e-07	7.03992e-07	0	0	0	0	1.62503	0.962379	0	0	0	0	-0.615372	-1.03909	0	0	0	0
comp15841_c0_seq2	comp15841_c0_seq2 len=233 path=[160:0-108 393:109-125 286:126-232]	6.30661e-07	7.92471e-07	1.13456e-06	1.57045e-06	1.36945e-06	1.37309e-06	4.8913e-07	5.63193e-07	4.15138e-07	2.40934e-07	2.03437e-07	4.01416e-07	0.775583	0.71068	0.365902	0.153418	0.148554	0.292346	-1.28935	-1.4071	-2.73297	-6.51816	-6.73158	-3.4206
comp37901_c0_seq1	comp37901_c0_seq1 len=207 path=[0:0-206]	4.72996e-07	6.09593e-07	5.6728e-07	6.73049e-07	8.55909e-07	5.49234e-07	5.70652e-07	9.15189e-07	5.70814e-07	2.40934e-07	6.10312e-07	1.07044e-06	1.20646	1.50131	1.00623	0.357974	0.713057	1.94897	-0.828869	-0.666085	-0.993808	-2.7935	-1.40241	-0.513091
TC238603	TC238603 UniRef100_P42210 Cluster: Phytepsin precursor (EC 3.4.23.40) (Aspartic proteinase) [Contains: Phytepsin 32 kDa subunit; Phytepsin 29 kDa subunit; Phytepsin 16 kDa subunit; Phytepsin 11 kDa subunit]; n=1; Hordeum vulgare|Rep: Phytepsin precursor (EC 3.4.23.40) (Aspartic proteinase) [Contains: Phytepsin 32 kDa subunit; Phytepsin 29 kDa subunit; Phytepsin 16 kDa subunit; Phytepsin 11 kDa su…	7.09494e-07	6.09593e-07	2.26912e-06	1.51436e-06	1.42652e-06	6.04157e-07	1.63043e-06	9.85588e-07	5.18922e-07	1.20467e-07	4.74687e-07	5.35221e-07	2.29803	1.6168	0.228689	0.0795499	0.33276	0.885897	-0.435156	-0.618507	-4.37275	-12.5707	-3.00517	-1.1288
CK214745	CK214745 weakly similar to UniRef100_A7PCJ5 Cluster: Chromosome chr17 scaffold_12, whole genome shotgun sequence; n=1; Vitis vinifera|Rep: Chromosome chr17 scaffold_12, whole genome shotgun sequence - Vitis vinifera (Grape), partial (11%)	7.88327e-08	0	0	5.60874e-08	1.71182e-07	5.49234e-08	0	1.40798e-07	0	0	3.39062e-07	6.69027e-08	0	0	0	0	1.98071	1.21811	0	0	0	0	-0.504868	-0.820945
comp7276_c0_seq1	comp7276_c0_seq1 len=385 path=[0:0-384] : tr|F2DJ29|F2DJ29_HORVD Predicted protein OS=Hordeum vulgare var. distichum PE=2 SV=1 e-value: 2e-12 blast score: 72.4	2.86951e-05	2.92605e-05	3.34695e-05	3.53351e-05	3.77171e-05	2.98783e-05	3.2038e-05	2.91453e-05	2.96823e-05	2.7346e-05	2.97697e-05	3.31168e-05	1.1165	0.996062	0.886848	0.773906	0.789289	1.10839	-0.895657	-1.00395	-1.12759	-1.29215	-1.26696	-0.90221
comp34905_c0_seq1	comp34905_c0_seq1 len=181 path=[0:0-180]	7.88327e-08	1.21919e-07	0	0	0	0	0	7.03992e-08	0	0	0	0	0	0.577427	0	0	0	0	0	-1.73182	0	0	0	0
comp2255_c0_seq1	comp2255_c0_seq1 len=412 path=[0:0-411]	2.34921e-05	2.11529e-05	4.14114e-05	4.04951e-05	4.33661e-05	3.33385e-05	3.5788e-05	2.26685e-05	0.000102228	3.43331e-05	4.64515e-05	5.39904e-05	1.52341	1.07165	2.46859	0.847834	1.07115	1.61946	-0.656424	-0.933139	-0.40509	-1.17948	-0.933577	-0.617489
comp17802_c0_seq1	comp17802_c0_seq1 len=461 path=[0:0-460]	1.49782e-06	1.28015e-06	3.21459e-06	2.35567e-06	2.11124e-06	2.14201e-06	9.78261e-07	1.83038e-06	1.92001e-06	2.52981e-06	1.89875e-06	2.4085e-06	0.653123	1.42982	0.597281	1.07392	0.899351	1.12441	-1.53111	-0.699389	-1.67425	-0.931165	-1.11191	-0.889357
BG905064	BG905064	0	1.21919e-07	0	5.60874e-08	0	5.49234e-08	0	0	1.03784e-07	0	0	1.33805e-07	0	0	0	0	0	2.43622	0	0	0	0	0	-0.410473
TC401532	TC401532 similar to UniRef100_A9S198 Cluster: Predicted protein; n=1; Physcomitrella patens subsp. patens|Rep: Predicted protein - Physcomitrella patens subsp. patens, partial (69%)	3.15331e-07	6.09593e-08	0	3.36524e-07	5.13545e-07	2.74617e-07	2.44565e-07	2.11197e-07	2.59461e-07	0	0	2.00708e-07	0.775583	3.46456	0	0	0	0.730865	-1.28935	-0.288637	0	0	0	-1.36824
comp7395_c0_seq1	comp7395_c0_seq1 len=336 path=[0:0-335]	6.30661e-06	5.60826e-06	9.07648e-06	1.0881e-05	8.73027e-06	1.07101e-05	1.06793e-05	9.22229e-06	6.33085e-06	6.38476e-06	5.22156e-06	5.55292e-06	1.69336	1.64441	0.697501	0.586783	0.598098	0.518477	-0.590543	-0.60812	-1.43369	-1.70421	-1.67197	-1.92873
TC21887	TC21887	2.36498e-07	6.09593e-08	0	0	0	0	1.63043e-07	0	0	0	0	0	0.689408	0	0	0	0	0	-1.45052	0	0	0	0	0
comp23278_c0_seq1	comp23278_c0_seq1 len=273 path=[0:0-272]	3.8628e-06	2.92605e-06	3.78187e-06	7.06701e-06	3.93718e-06	4.77834e-06	6.11413e-06	3.80155e-06	3.73624e-06	4.45728e-06	4.20437e-06	5.28531e-06	1.58282	1.29921	0.987936	0.630717	1.06786	1.1061	-0.631782	-0.769698	-1.01221	-1.5855	-0.93645	-0.904079
comp34994_c0_seq1	comp34994_c0_seq1 len=278 path=[0:0-277]	7.88327e-08	3.04797e-07	0	0	0	0	4.8913e-07	4.92794e-07	0	0	0	0	6.20467	1.6168	0	0	0	0	-0.161169	-0.618507	0	0	0	0
TC388465	TC388465 similar to UniRef100_Q94LY4 Cluster: Sec31p; n=3; Oryza sativa|Rep: Sec31p - Oryza sativa (Rice), partial (43%)	2.44381e-06	1.70686e-06	2.64731e-06	4.82352e-06	3.42364e-06	3.18556e-06	3.83152e-06	3.87195e-06	2.85407e-06	2.89121e-06	2.10219e-06	2.87681e-06	1.56785	2.26846	1.0781	0.599399	0.614021	0.90308	-0.637818	-0.440827	-0.927554	-1.66834	-1.62861	-1.10732
comp7147_c0_seq1	comp7147_c0_seq1 len=349 path=[0:0-348]	4.80879e-06	5.05962e-06	3.40368e-06	5.66483e-06	4.90721e-06	5.38249e-06	5.38044e-06	6.12473e-06	8.76978e-06	7.46896e-06	7.39156e-06	8.49664e-06	1.11887	1.21051	2.57656	1.31848	1.50626	1.57857	-0.893755	-0.826098	-0.388114	-0.758449	-0.663894	-0.633485
comp4077_c0_seq1	comp4077_c0_seq1 len=527 path=[0:0-526] : tr|F2CTH4|F2CTH4_HORVD Predicted protein OS=Hordeum vulgare var. distichum PE=2 SV=1 e-value: 3e-23 blast score: 108	1.44264e-05	1.59104e-05	7.37464e-06	1.21149e-05	1.36375e-05	1.27422e-05	1.33696e-05	1.13343e-05	1.52044e-05	9.39643e-06	1.4105e-05	1.35143e-05	0.926745	0.712382	2.06172	0.775611	1.03428	1.06059	-1.07905	-1.40374	-0.485032	-1.28931	-0.966855	-0.942868
comp3966_c0_seq1	comp3966_c0_seq1 len=506 path=[0:0-505]	1.15096e-05	1.12775e-05	2.81749e-05	2.13693e-05	2.18542e-05	1.38407e-05	1.2962e-05	1.38686e-05	1.76952e-05	1.61426e-05	2.16322e-05	2.18103e-05	1.12619	1.22976	0.62805	0.75541	0.98984	1.57581	-0.88795	-0.813164	-1.59223	-1.32378	-1.01026	-0.634596
comp688_c0_seq1	comp688_c0_seq1 len=531 path=[0:0-530] : tr|F2EIV9|F2EIV9_HORVD Predicted protein (Fragment) OS=Hordeum vulgare var. distichum PE=2 SV=1 e-value: 3e-17 blast score: 88.6	5.61289e-05	5.12058e-05	0.000124234	0.000105725	0.000109157	6.10748e-05	6.05707e-05	5.81497e-05	8.64524e-05	0.000106493	7.16099e-05	9.47342e-05	1.07914	1.13561	0.695882	1.00727	0.656027	1.55112	-0.926667	-0.880586	-1.43702	-0.992787	-1.52433	-0.644697
comp8990_c0_seq1	comp8990_c0_seq1 len=516 path=[0:0-515]	1.52147e-05	1.48741e-05	1.64511e-05	2.05841e-05	2.08271e-05	1.96626e-05	2.05435e-05	1.91486e-05	1.5879e-05	1.84315e-05	1.519e-05	1.77292e-05	1.35024	1.28738	0.965225	0.895424	0.729337	0.901672	-0.74061	-0.776772	-1.03603	-1.11679	-1.37111	-1.10905
TC416847	TC416847	1.52935e-05	1.32891e-05	2.0233e-05	3.17455e-05	2.90438e-05	2.11455e-05	2.85326e-06	1.54878e-06	5.70814e-07	3.61401e-07	4.06875e-07	7.35929e-07	0.186566	0.116545	0.0282121	0.0113843	0.014009	0.0348031	-5.36002	-8.58038	-35.4458	-87.8399	-71.3828	-28.7331
comp5921_c0_seq1	comp5921_c0_seq1 len=228 path=[0:0-227]	1.18249e-06	2.74317e-06	2.8364e-06	2.18741e-06	1.883e-06	3.07571e-06	2.20109e-06	1.68958e-06	2.28326e-06	1.20467e-06	2.10219e-06	2.4754e-06	1.8614	0.615922	0.804985	0.55073	1.1164	0.804821	-0.53723	-1.62358	-1.24226	-1.81577	-0.895734	-1.24251
comp15727_c0_seq1	comp15727_c0_seq1 len=196 path=[0:0-195] : tr|F2CQT0|F2CQT0_HORVD Predicted protein (Fragment) OS=Hordeum vulgare var. distichum PE=2 SV=1 e-value: 9e-32 blast score: 136	1.10366e-06	9.75349e-07	7.56373e-07	1.45827e-06	2.22536e-06	7.68928e-07	1.79348e-06	1.68958e-06	1.55677e-06	1.32514e-06	1.15281e-06	2.00708e-06	1.62503	1.73228	2.0582	0.908704	0.518033	2.61023	-0.615372	-0.577273	-0.485862	-1.10047	-1.93038	-0.383108
comp1257_c0_seq1	comp1257_c0_seq1 len=335 path=[0:0-334] : tr|F2CUS8|F2CUS8_HORVD Predicted protein OS=Hordeum vulgare var. distichum PE=2 SV=1 e-value: 9e-07 blast score: 53.1	3.9101e-05	4.31592e-05	2.64731e-05	2.64172e-05	3.14975e-05	3.97096e-05	3.19565e-05	3.44252e-05	5.4902e-05	3.096e-05	5.7844e-05	4.63635e-05	0.817282	0.797633	2.07388	1.17197	1.83647	1.16756	-1.22357	-1.25371	-0.482188	-0.853266	-0.544524	-0.856484
comp12302_c0_seq1	comp12302_c0_seq1 len=157 path=[0:0-156]	8.67159e-07	6.09593e-07	9.45466e-07	7.85224e-07	7.41788e-07	7.14004e-07	4.07609e-07	4.22395e-07	6.22707e-07	4.81868e-07	3.39062e-07	6.02124e-07	0.470051	0.692913	0.658624	0.61367	0.457088	0.843306	-2.12743	-1.44318	-1.51832	-1.62954	-2.18776	-1.18581
comp8930_c0_seq1	comp8930_c0_seq1 len=298 path=[0:0-297]	2.91681e-06	3.84044e-06	4.53824e-06	5.3283e-06	3.42364e-06	3.13063e-06	3.83152e-06	4.36475e-06	6.59031e-06	6.50522e-06	6.10312e-06	8.69734e-06	1.3136	1.13652	1.45217	1.22088	1.78264	2.77814	-0.761266	-0.879876	-0.688623	-0.819081	-0.560965	-0.359953
comp33800_c0_seq1	comp33800_c0_seq1 len=118 path=[0:0-117] : tr|F2CRQ3|F2CRQ3_HORVD Predicted protein OS=Hordeum vulgare var. distichum PE=2 SV=1 e-value: 2e-06 blast score: 52.4	0	1.82878e-07	0	1.68262e-07	1.14121e-07	0	0	7.03992e-08	1.55677e-07	0	6.78124e-08	1.33805e-07	0	0.384951	0	0	0.594214	0	0	-2.59773	0	0	-1.68289	0
TC376088	TC376088 similar to UniRef100_A7PNK9 Cluster: Chromosome chr8 scaffold_23, whole genome shotgun sequence; n=1; Vitis vinifera|Rep: Chromosome chr8 scaffold_23, whole genome shotgun sequence - Vitis vinifera (Grape), partial (76%) #or# TC442508 similar to UniRef100_A7PNK9 Cluster: Chromosome chr8 scaffold_23, whole genome shotgun sequence; n=1; Vitis vinifera|Rep: Chromosome chr8 scaffold_23, whol…	7.88327e-08	6.09593e-08	1.89093e-07	0	5.70606e-08	5.49234e-08	0	0	2.07569e-07	0	0	0	0	0	1.09771	0	0	0	0	0	-0.91099	0	0	0
TC242372	TC242372 translation elongation factor G	7.11859e-05	7.46752e-05	6.35353e-05	8.49724e-05	0.000106989	7.70575e-05	7.27989e-05	7.52567e-05	6.65258e-05	6.64978e-05	8.08324e-05	7.89451e-05	1.02266	1.00779	1.04707	0.782582	0.755524	1.0245	-0.977843	-0.992273	-0.955048	-1.27782	-1.32359	-0.97609
TC397069	TC397069	1.41899e-06	7.31512e-07	3.40368e-06	3.36524e-06	2.28242e-06	2.08709e-06	2.44565e-06	2.81597e-06	1.45298e-06	1.92747e-06	1.22062e-06	1.33805e-06	1.72352	3.84951	0.426886	0.572759	0.534793	0.64111	-0.580208	-0.259773	-2.34255	-1.74594	-1.86988	-1.5598
comp14333_c0_seq1	comp14333_c0_seq1 len=491 path=[0:0-233 249:234-490]	1.57665e-06	1.6459e-06	1.89093e-06	2.63611e-06	1.99712e-06	2.25186e-06	3.42391e-06	2.39357e-06	2.17947e-06	1.68654e-06	1.83094e-06	2.67611e-06	2.17163	1.45426	1.15259	0.639784	0.916788	1.1884	-0.460483	-0.687634	-0.86761	-1.56303	-1.09077	-0.841469
TC372879	TC372879 similar to UniRef100_Q2ESH6 Cluster: Chloroplast 50S ribosomal protein L31; n=1; Saccharum hybrid cultivar|Rep: Chloroplast 50S ribosomal protein L31 - Saccharum hybrid cultivar, partial (55%) #or# TC396403 similar to UniRef100_Q2ESH6 Cluster: Chloroplast 50S ribosomal protein L31; n=1; Saccharum hybrid cultivar|Rep: Chloroplast 50S ribosomal protein L31 - Saccharum hybrid cultivar, part…	7.88327e-08	6.09593e-08	0	1.68262e-07	0	0	3.26087e-07	7.03992e-08	1.03784e-07	0	6.78124e-08	0	4.13645	1.15485	0	0	0	0	-0.241753	-0.86591	0	0	0	0
comp14718_c0_seq1	comp14718_c0_seq1 len=389 path=[0:0-388] : tr|F2E430|F2E430_HORVD Predicted protein OS=Hordeum vulgare var. distichum PE=2 SV=1 e-value: 1e-10 blast score: 65.9	3.07447e-06	3.2918e-06	3.21459e-06	3.42133e-06	2.79597e-06	2.74617e-06	3.42391e-06	2.46397e-06	2.54272e-06	2.52981e-06	2.03437e-06	3.41204e-06	1.11366	0.748517	0.790994	0.739422	0.727609	1.24247	-0.897941	-1.33598	-1.26423	-1.35241	-1.37436	-0.804848
comp22951_c0_seq1	comp22951_c0_seq1 len=311 path=[0:0-310] : tr|F4YFD4|F4YFD4_CAMSI 30S ribosomal protein s13 OS=Camellia sinensis PE=2 SV=1 e-value: 4e-28 blast score: 124	6.30661e-07	5.48634e-07	0	0	0	0	8.15217e-07	3.51996e-07	0	0	0	0	1.29264	0.641586	0	0	0	0	-0.773611	-1.55864	0	0	0	0
TC384831	TC384831 similar to UniRef100_Q0JLN8 Cluster: Os01g0585600 protein; n=1; Oryza sativa Japonica Group|Rep: Os01g0585600 protein - Oryza sativa subsp. japonica (Rice), partial (35%)	3.70513e-06	3.16989e-06	5.86189e-06	6.78657e-06	5.9343e-06	4.99803e-06	4.56522e-06	4.85754e-06	5.24111e-06	5.78242e-06	4.13656e-06	4.81699e-06	1.23213	1.5324	0.8941	0.852038	0.697059	0.963778	-0.811601	-0.65257	-1.11844	-1.17366	-1.4346	-1.03758
comp32853_c0_seq1	comp32853_c0_seq1 len=237 path=[0:0-236]	7.88327e-08	3.65756e-07	0	3.36524e-07	2.85303e-07	3.84464e-07	1.63043e-07	5.63193e-07	5.70814e-07	3.61401e-07	6.78124e-07	4.01416e-07	2.06822	1.53981	0	1.07392	2.37686	1.04409	-0.483507	-0.649432	0	-0.931165	-0.420724	-0.957769
TC376132	TC376132 similar to UniRef100_A7PNA9 Cluster: Chromosome chr1 scaffold_22, whole genome shotgun sequence; n=1; Vitis vinifera|Rep: Chromosome chr1 scaffold_22, whole genome shotgun sequence - Vitis vinifera (Grape), partial (23%)	2.60148e-06	2.19454e-06	1.70184e-06	2.07523e-06	7.98849e-07	2.19694e-06	2.77174e-06	3.09756e-06	1.55677e-06	1.68654e-06	1.76312e-06	2.07398e-06	1.06545	1.41149	0.914755	0.812699	2.20708	0.944034	-0.938572	-0.708472	-1.09319	-1.23047	-0.453087	-1.05928
TC441462	TC441462	2.36498e-07	1.21919e-07	0	5.60874e-08	5.70606e-08	1.6477e-07	8.15217e-08	3.51996e-07	1.55677e-07	0	0	0	0.344704	2.88714	0	0	0	0	-2.90104	-0.346364	0	0	0	0
comp6540_c0_seq1	comp6540_c0_seq1 len=385 path=[0:0-384]	8.43509e-06	8.41239e-06	1.39929e-05	9.59094e-06	1.19827e-05	9.33698e-06	2.4212e-05	2.32317e-05	2.31439e-05	2.13227e-05	1.76312e-05	2.53561e-05	2.87038	2.76161	1.65398	2.22321	1.47139	2.71566	-0.348385	-0.362108	-0.604603	-0.4498	-0.679631	-0.368234
comp4703_c0_seq1	comp4703_c0_seq1 len=584 path=[0:0-583]	1.63184e-05	1.59713e-05	1.45602e-05	1.82284e-05	2.41937e-05	1.38407e-05	1.65489e-05	1.3587e-05	1.3492e-05	9.99877e-06	1.17994e-05	1.24439e-05	1.01413	0.850713	0.926635	0.548527	0.487704	0.89908	-0.986068	-1.17548	-1.07917	-1.82306	-2.05042	-1.11225
TC371752	TC371752 similar to UniRef100_A7PPZ6 Cluster: Chromosome chr18 scaffold_24, whole genome shotgun sequence; n=1; Vitis vinifera|Rep: Chromosome chr18 scaffold_24, whole genome shotgun sequence - Vitis vinifera (Grape), partial (75%)	3.94163e-07	1.82878e-07	1.89093e-07	1.68262e-07	1.14121e-07	5.49234e-08	2.44565e-07	1.40798e-07	2.59461e-07	2.40934e-07	1.35625e-07	6.69027e-08	0.620467	0.769903	1.37213	1.4319	1.18843	1.21811	-1.61169	-1.29886	-0.728792	-0.698374	-0.841447	-0.820945
comp379_c0_seq1	comp379_c0_seq1 len=390 path=[0:0-389] : tr|F2CR28|F2CR28_HORVD Predicted protein OS=Hordeum vulgare var. distichum PE=2 SV=1 e-value: 3e-12 blast score: 71.6	0.000149782	0.00016648	6.39135e-05	8.59259e-05	0.000109785	0.000145657	8.88587e-05	9.67284e-05	0.000137255	7.6858e-05	0.000159834	0.000132066	0.593253	0.581022	2.14751	0.894469	1.45589	0.906691	-1.68562	-1.72111	-0.465656	-1.11798	-0.686867	-1.10291
comp42082_c0_seq1	comp42082_c0_seq1 len=249 path=[0:0-248]	0	2.43837e-07	0	0	0	0	1.63043e-07	7.03992e-08	0	0	0	0	0	0.288714	0	0	0	0	0	-3.46364	0	0	0	0
CK155513	CK155513 homologue to UniRef100_Q05D71 Cluster: TNFRSF10C protein; n=1; Homo sapiens|Rep: TNFRSF10C protein - Homo sapiens (Human), partial (8%)	0	2.43837e-07	0	1.68262e-07	1.14121e-07	1.6477e-07	3.26087e-07	7.03992e-08	5.18922e-08	1.20467e-07	0	0	0	0.288714	0	0.715949	0	0	0	-3.46364	0	-1.39675	0	0
comp30306_c0_seq1	comp30306_c0_seq1 len=251 path=[0:0-250]	3.15331e-07	2.43837e-07	0	0	0	0	8.15217e-08	2.81597e-07	0	0	0	0	0.258528	1.15485	0	0	0	0	-3.86806	-0.86591	0	0	0	0
TC434981	TC434981 similar to UniRef100_P87358 Cluster: Znr-1; n=1; Danio rerio|Rep: Znr-1 - Danio rerio (Zebrafish) (Brachydanio rerio), partial (4%)	7.88327e-07	1.52398e-06	2.08003e-06	2.35567e-06	9.7003e-07	1.97724e-06	2.11957e-06	2.11197e-06	1.19352e-06	1.56607e-06	7.45937e-07	1.80637e-06	2.68869	1.38583	0.573801	0.66481	0.768983	0.913581	-0.371928	-0.721592	-1.74276	-1.50419	-1.30042	-1.09459
comp16253_c0_seq1	comp16253_c0_seq1 len=243 path=[0:0-242] : tr|E3KSK7|E3KSK7_PUCGT Putative uncharacterized protein OS=Puccinia graminis f. sp. tritici (strain CRL 75-36-700-3 / race SCCL) GN=PGTG_12877 PE=4 SV=1 e-value: 3e-10 blast score: 65.5	7.88327e-08	8.53431e-07	5.6728e-07	3.53351e-06	5.70606e-08	2.74617e-06	8.15217e-08	4.29435e-06	1.55677e-07	2.77074e-06	0	2.27469e-06	1.03411	5.03187	0.274427	0.784134	0	0.828314	-0.967014	-0.198733	-3.64396	-1.27529	0	-1.20727
comp4235_c0_seq1	comp4235_c0_seq1 len=406 path=[0:0-405] : tr|Q0JMF0|Q0JMF0_ORYSJ Os01g0510100 protein OS=Oryza sativa subsp. japonica GN=Os01g0510100 PE=4 SV=1 e-value: 3e-12 blast score: 71.6	1.10366e-05	1.03021e-05	1.73966e-05	2.86046e-05	1.42081e-05	2.37269e-05	2.52717e-05	2.06974e-05	1.72282e-05	2.66232e-05	1.07144e-05	1.77292e-05	2.28982	2.00904	0.990322	0.930733	0.754103	0.747219	-0.436716	-0.497751	-1.00977	-1.07442	-1.32608	-1.3383
comp10831_c0_seq1	comp10831_c0_seq1 len=308 path=[0:0-102 324:103-121 114:122-307]	1.41899e-06	5.48634e-07	1.70184e-06	2.07523e-06	2.96715e-06	1.09847e-06	3.91304e-06	2.88637e-06	8.82168e-07	1.32514e-06	6.10312e-07	1.40496e-06	2.75763	5.261	0.518361	0.638549	0.20569	1.27901	-0.36263	-0.190078	-1.92916	-1.56605	-4.8617	-0.781853
comp5568_c0_seq1	comp5568_c0_seq1 len=524 path=[0:0-523] : tr|F2EE97|F2EE97_HORVD Predicted protein OS=Hordeum vulgare var. distichum PE=2 SV=1 e-value: 6e-24 blast score: 110	1.26921e-05	1.37768e-05	6.24008e-06	1.02079e-05	1.23251e-05	1.24676e-05	1.05978e-05	1.2531e-05	1.08974e-05	8.91456e-06	1.26809e-05	1.20425e-05	0.834997	0.909576	1.74635	0.8733	1.02887	0.965901	-1.19761	-1.09941	-0.572623	-1.14508	-0.971939	-1.0353
comp28286_c0_seq1	comp28286_c0_seq1 len=334 path=[0:0-333]	3.94163e-07	4.87675e-07	3.78187e-07	6.16961e-07	9.1297e-07	4.39387e-07	7.33696e-07	6.33592e-07	3.63246e-07	6.02335e-07	5.425e-07	9.36637e-07	1.8614	1.29921	0.960493	0.976294	0.594214	2.13169	-0.53723	-0.769698	-1.04113	-1.02428	-1.68289	-0.469112
TC241474	TC241474 UniRef100_Q5G1L6 Cluster: Ferritin; n=1; Triticum aestivum|Rep: Ferritin - Triticum aestivum (Wheat), complete #or# TC251876 homologue to UniRef100_Q5G1L6 Cluster: Ferritin; n=1; Triticum aestivum|Rep: Ferritin - Triticum aestivum (Wheat), partial (97%) #or# TC258089 UniRef100_Q5G1L6 Cluster: Ferritin; n=1; Triticum aestivum|Rep: Ferritin - Triticum aestivum (Wheat), partial (55%)	2.75914e-06	2.13358e-06	1.13456e-06	1.45827e-06	1.42652e-06	1.92232e-06	6.44022e-06	7.9551e-06	2.6984e-06	3.49355e-06	1.55969e-06	2.00708e-06	2.33414	3.72853	2.37836	2.39567	1.09335	1.04409	-0.428424	-0.268202	-0.420457	-0.417419	-0.914617	-0.957769
comp7545_c0_seq1	comp7545_c0_seq1 len=386 path=[0:0-385]	8.67159e-06	4.69387e-06	2.06112e-05	5.38439e-05	2.49355e-05	2.92742e-05	3.26087e-05	2.38653e-05	2.20542e-05	4.63798e-05	1.1935e-05	2.62258e-05	3.7604	5.08436	1.07001	0.861376	0.478635	0.895869	-0.265929	-0.196682	-0.934569	-1.16093	-2.08928	-1.11623
CA631798	CA631798	1.26132e-06	1.6459e-06	9.45466e-07	1.85088e-06	1.19827e-06	1.53786e-06	1.875e-06	1.90078e-06	1.60866e-06	3.61401e-07	1.76312e-06	1.27115e-06	1.48654	1.15485	1.70144	0.195259	1.47139	0.826573	-0.672705	-0.86591	-0.587736	-5.12141	-0.679631	-1.20981
comp26465_c0_seq1	comp26465_c0_seq1 len=170 path=[0:0-169]	1.57665e-07	3.65756e-07	0	3.92612e-07	2.85303e-07	0	8.15217e-08	7.03992e-08	1.55677e-07	4.81868e-07	2.03437e-07	2.67611e-07	0.517056	0.192476	0	1.22734	0.713057	0	-1.93403	-5.19546	0	-0.81477	-1.40241	0
comp7184_c0_seq1	comp7184_c0_seq1 len=326 path=[0:0-325] : tr|F2EGJ7|F2EGJ7_HORVD Predicted protein OS=Hordeum vulgare var. distichum PE=2 SV=1 e-value: 4e-06 blast score: 51.2	3.3898e-06	4.81579e-06	3.78187e-06	7.51571e-06	8.67321e-06	5.49234e-06	1.875e-06	2.67517e-06	5.96761e-06	6.02335e-06	5.49281e-06	7.15858e-06	0.553129	0.5555	1.57795	0.801435	0.633307	1.30338	-1.8079	-1.80018	-0.633732	-1.24776	-1.57901	-0.767238
comp21397_c0_seq1	comp21397_c0_seq1 len=311 path=[0:0-310]	3.15331e-07	7.92471e-07	3.02549e-06	1.23392e-06	1.65476e-06	1.09847e-06	4.8913e-07	4.92794e-07	1.81623e-06	9.63737e-07	8.81562e-07	1.07044e-06	1.55117	0.621845	0.600308	0.781035	0.532744	0.974487	-0.644676	-1.60812	-1.66581	-1.28035	-1.87707	-1.02618
comp7257_c0_seq1	comp7257_c0_seq1 len=257 path=[0:0-256]	5.04529e-06	4.69387e-06	1.13456e-05	1.10492e-05	9.7003e-06	8.12866e-06	7.74457e-06	6.33592e-06	6.6941e-06	7.70989e-06	5.69625e-06	8.36283e-06	1.53501	1.34983	0.590017	0.697777	0.587223	1.02881	-0.651462	-0.740834	-1.69487	-1.43312	-1.70293	-0.971999
comp17523_c0_seq1	comp17523_c0_seq1 len=321 path=[0:0-320] : tr|D8Q5T0|D8Q5T0_SCHCM SC15 protein OS=Schizophyllum commune (strain H4-8 / FGSC 9210) GN=SC15 PE=4 SV=1 e-value: 3e-19 blast score: 95.5	1.49782e-06	7.31512e-07	1.89093e-07	5.60874e-08	1.5977e-06	0	8.96739e-07	5.63193e-07	0	0	0	0	0.598696	0.769903	0	0	0	0	-1.6703	-1.29886	0	0	0	0
TC380029	TC380029 similar to UniRef100_Q0JD86 Cluster: Os04g0421900 protein; n=1; Oryza sativa Japonica Group|Rep: Os04g0421900 protein - Oryza sativa subsp. japonica (Rice), partial (16%)	1.34016e-06	1.40206e-06	2.45821e-06	3.58959e-06	2.91009e-06	2.63632e-06	2.69022e-06	2.32317e-06	2.6984e-06	2.40934e-06	2.50906e-06	2.4754e-06	2.00739	1.65697	1.09771	0.671202	0.862193	0.938958	-0.498159	-0.603513	-0.91099	-1.48986	-1.15983	-1.06501
CA628000	CA628000 homologue to UniRef100_P38076 Cluster: Cysteine synthase (O-acetylserine sulfhydrylase) (O- acetylserine (Thiol)-lyase); n=1; Triticum aestivum|Rep: Cysteine synthase (O-acetylserine sulfhydrylase) (O- acetylserine (Thiol)-lyase) - Triticum aestivum (Wheat), partial (41%) #or# TC381713 homologue to UniRef100_P38076 Cluster: Cysteine synthase (O-acetylserine sulfhydrylase) (O- acetylserin…	0	0	1.89093e-07	1.12175e-07	5.70606e-08	5.49234e-08	2.44565e-07	7.03992e-08	5.18922e-08	1.20467e-07	6.78124e-08	6.69027e-08	0	0	0.274427	1.07392	1.18843	1.21811	0	0	-3.64396	-0.931165	-0.841447	-0.820945
comp13223_c0_seq1	comp13223_c0_seq1 len=189 path=[0:0-113 129:114-188] #or# comp13223_c0_seq2 len=137 path=[0:0-113 196:114-136]	1.02482e-06	1.15823e-06	2.08003e-06	2.35567e-06	2.33948e-06	2.30678e-06	2.77174e-06	1.75998e-06	2.17947e-06	1.68654e-06	1.085e-06	1.80637e-06	2.7046	1.51955	1.04781	0.715949	0.463777	0.78307	-0.369741	-0.658092	-0.954371	-1.39675	-2.15621	-1.27703
CJ570244	CJ570244 weakly similar to UniRef100_Q2R271 Cluster: HAT family dimerisation domain containing protein, expressed; n=2; Oryza sativa Japonica Group|Rep: HAT family dimerisation domain containing protein, expressed - Oryza sativa subsp. japonica (Rice), partial (8%)	7.88327e-08	2.43837e-07	3.78187e-07	3.92612e-07	2.85303e-07	2.74617e-07	1.63043e-07	2.11197e-07	1.03784e-07	4.81868e-07	3.39062e-07	6.02124e-07	2.06822	0.866141	0.274427	1.22734	1.18843	2.19259	-0.483507	-1.15455	-3.64396	-0.81477	-0.841447	-0.456081
comp38982_c0_seq1	comp38982_c0_seq1 len=109 path=[0:0-108]	7.88327e-08	6.09593e-08	0	0	0	0	8.15217e-08	0	0	0	0	0	1.03411	0	0	0	0	0	-0.967014	0	0	0	0	0
TC445223	TC445223 similar to UniRef100_Q69V59 Cluster: SNF7 protein-like; n=3; Oryza sativa|Rep: SNF7 protein-like - Oryza sativa subsp. japonica (Rice), partial (70%)	7.88327e-08	6.09593e-08	1.89093e-07	1.12175e-07	5.70606e-08	0	1.63043e-07	0	1.03784e-07	1.20467e-07	3.39062e-07	0	2.06822	0	0.548853	1.07392	5.94214	0	-0.483507	0	-1.82198	-0.931165	-0.168289	0
TC2473	TC2473 similar to UniRef100_A7PQS6 Cluster: Chromosome chr6 scaffold_25, whole genome shotgun sequence; n=1; Vitis vinifera|Rep: Chromosome chr6 scaffold_25, whole genome shotgun sequence - Vitis vinifera (Grape), partial (41%)	7.88327e-08	6.09593e-08	0	0	0	0	1.63043e-07	7.03992e-08	0	0	0	0	2.06822	1.15485	0	0	0	0	-0.483507	-0.86591	0	0	0	0
comp34149_c0_seq1	comp34149_c0_seq1 len=125 path=[0:0-124]	0	6.09593e-08	0	5.60874e-08	1.71182e-07	0	0	7.03992e-08	0	0	6.78124e-08	6.69027e-08	0	1.15485	0	0	0.396143	0	0	-0.86591	0	0	-2.52434	0
comp3301_c0_seq1	comp3301_c0_seq1 len=415 path=[0:0-414] : tr|F2DEN3|F2DEN3_HORVD Predicted protein OS=Hordeum vulgare var. distichum PE=2 SV=1 e-value: 2e-31 blast score: 134	1.6476e-05	1.86536e-05	1.58838e-05	2.5015e-05	1.83735e-05	2.13652e-05	2.33152e-05	2.24573e-05	1.65536e-05	1.62631e-05	1.6275e-05	1.97363e-05	1.4151	1.20392	1.04217	0.650133	0.885785	0.923758	-0.706664	-0.830622	-0.959538	-1.53815	-1.12894	-1.08253
comp6901_c0_seq1	comp6901_c0_seq1 len=156 path=[0:0-155] : tr|F2CRI6|F2CRI6_HORVD Predicted protein OS=Hordeum vulgare var. distichum PE=2 SV=1 e-value: 4e-05 blast score: 45.1	3.15331e-07	3.04797e-07	9.45466e-07	4.48699e-07	6.27667e-07	3.84464e-07	2.44565e-07	4.22395e-07	3.11353e-07	3.61401e-07	4.74687e-07	6.02124e-07	0.775583	1.38583	0.329312	0.805442	0.756273	1.56614	-1.28935	-0.721592	-3.03663	-1.24155	-1.32227	-0.638513
comp471_c0_seq1	comp471_c0_seq1 len=376 path=[0:0-375] : tr|A6N0G0|A6N0G0_ORYSI Ubiquitin fusion protein (Fragment) OS=Oryza sativa subsp. indica PE=2 SV=1 e-value: 2e-28 blast score: 125	0.000110208	0.000116737	8.28228e-05	0.000146276	0.00010522	0.000144339	0.000117147	0.000103909	9.65714e-05	9.13141e-05	0.000107483	0.000125844	1.06296	0.890112	1.166	0.624259	1.02151	0.871865	-0.940769	-1.12345	-0.857633	-1.6019	-0.978946	-1.14697
comp10507_c0_seq1	comp10507_c0_seq1 len=415 path=[0:0-414] : tr|F2DPV2|F2DPV2_HORVD Predicted protein OS=Hordeum vulgare var. distichum PE=2 SV=1 e-value: 9e-29 blast score: 126	2.499e-05	2.29817e-05	3.87641e-05	3.96538e-05	3.69182e-05	3.04825e-05	4.05978e-05	4.23803e-05	4.25516e-05	3.61401e-05	2.88203e-05	3.7131e-05	1.62457	1.84409	1.09771	0.911392	0.780652	1.21811	-0.615549	-0.542273	-0.91099	-1.09722	-1.28098	-0.820945
comp15945_c0_seq1	comp15945_c0_seq1 len=310 path=[0:0-309]	1.10366e-06	1.58494e-06	1.89093e-07	1.29001e-06	7.98849e-07	9.33698e-07	4.07609e-07	9.15189e-07	4.15138e-07	0	6.10312e-07	8.02832e-07	0.369325	0.577427	2.19541	0	0.76399	0.859841	-2.70764	-1.73182	-0.455495	0	-1.30892	-1.16301
CN498848	CN498848 weakly similar to UniRef100_Q9UUC1 Cluster: 60S ribosomal protein L21-A; n=1; Schizosaccharomyces pombe|Rep: 60S ribosomal protein L21-A - Schizosaccharomyces pombe (Fission yeast), partial (62%)	0	0	0	5.60874e-08	0	1.09847e-07	0	1.40798e-07	0	2.40934e-07	0	0	0	0	0	4.29569	0	0	0	0	0	-0.232791	0	0
comp8437_c0_seq1	comp8437_c0_seq1 len=323 path=[0:0-322]	6.30661e-06	8.59527e-06	7.75282e-06	8.69355e-06	9.18676e-06	9.55667e-06	5.78804e-06	6.26552e-06	8.71789e-06	7.70989e-06	8.95124e-06	7.82761e-06	0.917774	0.728951	1.12448	0.886853	0.974364	0.819073	-1.08959	-1.37183	-0.8893	-1.12758	-1.02631	-1.22089
TC16792	TC16792 similar to UniRef100_A7PAN1 Cluster: Chromosome chr14 scaffold_9, whole genome shotgun sequence; n=1; Vitis vinifera|Rep: Chromosome chr14 scaffold_9, whole genome shotgun sequence - Vitis vinifera (Grape), partial (40%)	7.88327e-08	0	0	0	0	0	1.63043e-07	0	5.18922e-08	0	0	0	2.06822	0	0	0	0	0	-0.483507	0	0	0	0	0
CV060969	CV060969 similar to UniRef100_P45434 Cluster: Translocon-associated protein subunit alpha precursor; n=2; Arabidopsis thaliana|Rep: Translocon-associated protein subunit alpha precursor - Arabidopsis thaliana (Mouse-ear cress), partial (24%) #or# TC249441 similar to UniRef100_P45434 Cluster: Translocon-associated protein subunit alpha precursor; n=2; Arabidopsis thaliana|Rep: Translocon-associate…	0	0	0	1.68262e-07	1.71182e-07	5.49234e-08	1.63043e-07	2.11197e-07	1.55677e-07	2.40934e-07	6.78124e-08	6.69027e-08	0	0	0	1.4319	0.396143	1.21811	0	0	0	-0.698374	-2.52434	-0.820945
TC263752	TC263752 similar to UniRef100_A7PG21 Cluster: Chromosome chr6 scaffold_15, whole genome shotgun sequence; n=1; Vitis vinifera|Rep: Chromosome chr6 scaffold_15, whole genome shotgun sequence - Vitis vinifera (Grape), partial (95%)	7.88327e-08	2.43837e-07	3.78187e-07	1.12175e-07	0	0	1.63043e-07	2.11197e-07	5.18922e-08	0	3.39062e-07	6.69027e-08	2.06822	0.866141	0.137213	0	0	0	-0.483507	-1.15455	-7.28792	0	0	0
TC239108	TC239108 similar to UniRef100_A7PCV3 Cluster: Chromosome chr17 scaffold_12, whole genome shotgun sequence; n=1; Vitis vinifera|Rep: Chromosome chr17 scaffold_12, whole genome shotgun sequence - Vitis vinifera (Grape), complete #or# TC258974 similar to UniRef100_Q96372 Cluster: Cell division cycle protein 48 homolog; n=1; Capsicum annuum|Rep: Cell division cycle protein 48 homolog - Capsicum annuu…	1.9314e-05	1.98727e-05	2.85531e-05	3.07359e-05	2.47643e-05	2.7956e-05	2.56793e-05	2.29501e-05	2.90078e-05	2.68642e-05	1.8784e-05	2.51554e-05	1.32957	1.15485	1.01592	0.874032	0.758513	0.899821	-0.752122	-0.86591	-0.984326	-1.14412	-1.31837	-1.11133
comp17095_c0_seq1	comp17095_c0_seq1 len=381 path=[0:0-380]	1.89198e-06	1.82878e-06	9.45466e-07	1.90697e-06	1.82594e-06	1.81247e-06	8.15217e-07	2.04158e-06	2.90596e-06	1.44561e-06	2.7125e-06	2.74301e-06	0.43088	1.11636	3.07358	0.758063	1.48554	1.51341	-2.32083	-0.895769	-0.325354	-1.31915	-0.673158	-0.660761
TC449980	TC449980 similar to UniRef100_Q6H4E3 Cluster: Zinc finger (C3HC4-type RING finger) protein-like; n=1; Oryza sativa Japonica Group|Rep: Zinc finger (C3HC4-type RING finger) protein-like - Oryza sativa subsp. japonica (Rice), partial (93%)	7.88327e-06	7.498e-06	8.88738e-06	1.00957e-05	8.67321e-06	1.01059e-05	1.13315e-05	1.21791e-05	8.19897e-06	9.63737e-06	8.74781e-06	9.50018e-06	1.43741	1.62431	0.92254	0.954598	1.0086	0.940062	-0.695693	-0.615647	-1.08396	-1.04756	-0.991473	-1.06376
comp22058_c0_seq1	comp22058_c0_seq1 len=169 path=[0:0-168]	1.57665e-07	3.04797e-07	3.78187e-07	2.80437e-07	1.14121e-07	5.49234e-08	8.15217e-08	0	0	0	0	0	0.517056	0	0	0	0	0	-1.93403	0	0	0	0	0
comp11552_c0_seq1	comp11552_c0_seq1 len=499 path=[0:0-498] : tr|D3WYW3|D3WYW3_HORVD Predicted protein OS=Hordeum vulgare var. distichum GN=UGT PE=2 SV=1 e-value: 6e-24 blast score: 110	4.3358e-06	2.56029e-06	8.13101e-06	2.00232e-05	5.87724e-06	6.8105e-06	1.57337e-05	1.3587e-05	8.14708e-06	1.24081e-05	3.59406e-06	1.04368e-05	3.62879	5.30683	1.00198	0.619687	0.611521	1.53246	-0.275574	-0.188436	-0.998028	-1.61372	-1.63527	-0.652546
comp11672_c0_seq1	comp11672_c0_seq1 len=356 path=[0:0-355]	3.6263e-06	4.45003e-06	6.42917e-06	6.33788e-06	5.24958e-06	6.31619e-06	6.60326e-06	6.05433e-06	5.76004e-06	5.05962e-06	5.35718e-06	6.35575e-06	1.82094	1.36051	0.895922	0.798314	1.0205	1.00626	-0.549168	-0.735017	-1.11617	-1.25264	-0.979913	-0.993776
comp27957_c0_seq1	comp27957_c0_seq1 len=203 path=[0:0-202]	1.57665e-07	3.04797e-07	0	0	0	0	1.63043e-07	2.11197e-07	0	0	0	0	1.03411	0.692913	0	0	0	0	-0.967014	-1.44318	0	0	0	0
comp2049_c0_seq1	comp2049_c0_seq1 len=483 path=[0:0-482] : tr|A2YLN1|A2YLN1_ORYSI Putative uncharacterized protein OS=Oryza sativa subsp. indica GN=OsI_26130 PE=4 SV=1 e-value: 5e-05 blast score: 47.8	2.33345e-05	2.34693e-05	4.08441e-05	4.69451e-05	3.97712e-05	3.78422e-05	4.66304e-05	4.39995e-05	4.717e-05	3.72243e-05	4.07553e-05	4.63635e-05	1.99835	1.87476	1.15488	0.792932	1.02474	1.22518	-0.500413	-0.533401	-0.865892	-1.26114	-0.975855	-0.816207
CD454193	CD454193 similar to UniRef100_Q2HWG4 Cluster: TypeA response regulator 1; n=1; Oryza sativa Japonica Group|Rep: TypeA response regulator 1 - Oryza sativa subsp. japonica (Rice), partial (24%)	1.34016e-06	2.13358e-06	0	1.12175e-07	3.99424e-07	6.59081e-07	2.44565e-07	1.40798e-07	6.22707e-07	0	1.01719e-06	7.35929e-07	0.18249	0.0659917	0	0	2.54663	1.1166	-5.47975	-15.1534	0	0	-0.392675	-0.895577
TC424206	TC424206 similar to UniRef100_A7QYE6 Cluster: Chromosome undetermined scaffold_245, whole genome shotgun sequence; n=1; Vitis vinifera|Rep: Chromosome undetermined scaffold_245, whole genome shotgun sequence - Vitis vinifera (Grape), partial (28%)	0	6.09593e-08	0	0	0	0	0	1.40798e-07	0	0	0	0	0	2.30971	0	0	0	0	0	-0.432955	0	0	0	0
comp7533_c0_seq1	comp7533_c0_seq1 len=369 path=[0:0-368]	5.51829e-06	4.93771e-06	5.10552e-06	7.68397e-06	4.73603e-06	6.64573e-06	9.21196e-06	9.92628e-06	7.78383e-06	5.42102e-06	4.40781e-06	6.55646e-06	1.66935	2.0103	1.52459	0.705497	0.930697	0.986567	-0.599035	-0.497438	-0.655913	-1.41744	-1.07446	-1.01362
comp19_c0_seq1	comp19_c0_seq1 len=477 path=[0:0-476] : tr|Q5S1S5|Q5S1S5_WHEAT Non-specific lipid-transfer protein OS=Triticum aestivum GN=LTP4 PE=3 SV=1 e-value: 3e-21 blast score: 101	0.00182261	0.00231475	0.00060472	0.000390985	0.000586241	0.00108908	0.00130948	0.00142938	0.000917299	0.000403565	0.00083606	0.000845716	0.718466	0.617512	1.5169	1.03217	1.42614	0.776545	-1.39185	-1.6194	-0.65924	-0.968829	-0.701195	-1.28776
comp1694_c0_seq1	comp1694_c0_seq1 len=415 path=[0:0-414]	3.78397e-05	3.20646e-05	3.98987e-05	4.07194e-05	4.71321e-05	3.23499e-05	2.6087e-05	2.91453e-05	2.66207e-05	3.18033e-05	2.44803e-05	2.95041e-05	0.689408	0.908954	0.667208	0.781035	0.519398	0.91203	-1.45052	-1.10017	-1.49878	-1.28035	-1.92531	-1.09646
comp7521_c0_seq1	comp7521_c0_seq1 len=735 path=[0:0-734]	1.67914e-05	1.43864e-05	2.09894e-05	2.6305e-05	2.00283e-05	1.98823e-05	2.32337e-05	2.00638e-05	1.71763e-05	1.97566e-05	1.49187e-05	2.08067e-05	1.38367	1.39463	0.818335	0.751059	0.744884	1.0465	-0.722716	-0.717034	-1.22199	-1.33145	-1.34249	-0.95557
comp41495_c0_seq1	comp41495_c0_seq1 len=191 path=[0:0-190] : tr|B9FQ15|B9FQ15_ORYSJ Putative uncharacterized protein OS=Oryza sativa subsp. japonica GN=OsJ_22054 PE=4 SV=1 e-value: 2e-07 blast score: 55.5	7.88327e-08	2.43837e-07	3.78187e-07	3.36524e-07	3.99424e-07	2.74617e-07	2.44565e-07	2.11197e-07	5.18922e-08	1.20467e-07	2.7125e-07	6.69027e-08	3.10233	0.866141	0.137213	0.357974	0.679102	0.243622	-0.322338	-1.15455	-7.28792	-2.7935	-1.47253	-4.10473
comp3771_c0_seq1	comp3771_c0_seq1 len=280 path=[0:0-279] : tr|A5BTC9|A5BTC9_VITVI Putative uncharacterized protein OS=Vitis vinifera GN=VITISV_009131 PE=4 SV=1 e-value: 0.001 blast score: 43.1	3.15331e-07	2.15796e-05	9.45466e-06	0.000171852	2.22536e-06	9.91917e-05	9.78261e-07	9.04629e-05	1.40109e-06	7.92673e-05	1.01719e-06	6.41596e-05	3.10233	4.19206	0.14819	0.461254	0.457088	0.646825	-0.322338	-0.238546	-6.74808	-2.168	-2.18776	-1.54601
comp24056_c0_seq1	comp24056_c0_seq1 len=417 path=[0:0-416]	6.30661e-07	6.70553e-07	3.78187e-07	1.00957e-06	5.70606e-07	1.04354e-06	2.44565e-07	9.85588e-07	7.26491e-07	6.02335e-07	4.06875e-07	1.07044e-06	0.387792	1.46981	1.92099	0.596624	0.713057	1.02578	-2.5787	-0.680358	-0.520566	-1.6761	-1.40241	-0.974872
GH729326	GH729326 similar to UniRef100_Q2QTN6 Cluster: Expressed protein; n=1; Oryza sativa Japonica Group|Rep: Expressed protein - Oryza sativa subsp. japonica (Rice), partial (8%)	5.51829e-07	9.1439e-07	3.78187e-07	7.85224e-07	7.98849e-07	6.59081e-07	9.78261e-07	9.85588e-07	6.74599e-07	9.63737e-07	6.10312e-07	5.35221e-07	1.77276	1.07786	1.78377	1.22734	0.76399	0.812072	-0.564091	-0.927761	-0.560609	-0.81477	-1.30892	-1.23142
comp22927_c0_seq1	comp22927_c0_seq1 len=161 path=[0:0-160]	3.94163e-07	2.43837e-07	9.45466e-07	1.51436e-06	1.19827e-06	1.37309e-06	5.70652e-07	5.63193e-07	5.70814e-07	8.4327e-07	6.78124e-07	1.00354e-06	1.44776	2.30971	0.603739	0.556849	0.565918	0.730865	-0.690724	-0.432955	-1.65635	-1.79582	-1.76704	-1.36824
comp16048_c0_seq1	comp16048_c0_seq1 len=344 path=[0:0-343] : tr|F2CSP4|F2CSP4_HORVD Predicted protein OS=Hordeum vulgare var. distichum PE=2 SV=1 e-value: 8e-19 blast score: 93.2	1.49782e-06	1.6459e-06	7.56373e-07	1.12175e-06	1.54064e-06	2.80109e-06	8.96739e-07	1.12639e-06	1.14163e-06	1.68654e-06	2.44125e-06	1.53876e-06	0.598696	0.684358	1.50935	1.50349	1.58457	0.549343	-1.6703	-1.46122	-0.662538	-0.665118	-0.631086	-1.82036
comp3354_c0_seq1	comp3354_c0_seq1 len=262 path=[0:0-261]	1.32439e-05	1.08508e-05	1.56947e-05	2.27154e-05	7.01845e-06	1.32365e-05	3.50543e-05	3.32988e-05	4.42122e-05	2.0118e-05	8.06968e-06	1.55883e-05	2.64683	3.0688	2.81701	0.885655	1.14978	1.17767	-0.37781	-0.32586	-0.354987	-1.12911	-0.869731	-0.849132
TC241119	TC241119 UniRef100_A1E9M8 Cluster: Chloroplast 50S ribosomal protein L16; n=1; Hordeum vulgare|Rep: Chloroplast 50S ribosomal protein L16 - Hordeum vulgare (Barley), partial (98%)	0	0	1.89093e-07	0	0	0	8.15217e-08	0	5.18922e-08	0	0	0	0	0	0.274427	0	0	0	0	0	-3.64396	0	0	0
comp14106_c0_seq1	comp14106_c0_seq1 len=385 path=[0:0-384]	3.8628e-06	4.26715e-06	6.42917e-06	5.27222e-06	5.9343e-06	6.26127e-06	6.44022e-06	5.35034e-06	4.82598e-06	4.69822e-06	5.08593e-06	5.55292e-06	1.66724	1.25384	0.750637	0.891128	0.85704	0.886868	-0.599793	-0.797549	-1.3322	-1.12217	-1.16681	-1.12756
comp5224_c0_seq2	comp5224_c0_seq2 len=734 path=[0:0-542 851:543-733] : tr|F2CQU5|F2CQU5_HORVD Predicted protein OS=Hordeum vulgare var. distichum PE=2 SV=1 e-value: 1e-43 blast score: 177	1.02482e-06	1.52398e-06	1.13456e-06	1.23392e-06	2.22536e-06	2.14201e-06	1.30435e-06	1.26718e-06	2.80218e-06	1.32514e-06	2.78031e-06	2.07398e-06	1.27275	0.831495	2.46984	1.07392	1.24937	0.96824	-0.785699	-1.20265	-0.404885	-0.931165	-0.800401	-1.0328
comp9064_c0_seq1	comp9064_c0_seq1 len=370 path=[0:0-369]	1.6949e-05	1.86536e-05	1.6262e-05	1.96306e-05	2.00283e-05	2.45508e-05	1.4837e-05	1.4291e-05	2.42337e-05	1.67449e-05	2.35309e-05	2.14088e-05	0.875387	0.766129	1.4902	0.853002	1.17489	0.872024	-1.14235	-1.30526	-0.671051	-1.17233	-0.851147	-1.14676
comp29959_c0_seq1	comp29959_c0_seq1 len=235 path=[0:0-234]	3.94163e-07	6.09593e-08	0	0	0	0	2.44565e-07	1.40798e-07	0	0	6.78124e-08	0	0.620467	2.30971	0	0	0	0	-1.61169	-0.432955	0	0	0	0
comp11726_c0_seq1	comp11726_c0_seq1 len=334 path=[0:0-333] : tr|Q0DBU7|Q0DBU7_ORYSJ Os06g0525000 protein (Fragment) OS=Oryza sativa subsp. japonica GN=Os06g0525000 PE=4 SV=1 e-value: 6e-07 blast score: 53.9	2.75914e-06	2.98701e-06	2.26912e-06	2.69219e-06	2.62479e-06	2.08709e-06	1.1413e-06	2.81597e-07	7.78383e-07	3.61401e-07	4.06875e-07	6.02124e-07	0.413645	0.0942738	0.343033	0.13424	0.155012	0.288499	-2.41753	-10.6074	-2.91517	-7.44932	-6.4511	-3.46621
TC374634	TC374634 #or# TC380170 #or# TC400733	1.81315e-06	1.58494e-06	9.64376e-06	8.69355e-06	7.532e-06	3.13063e-06	1.00272e-05	8.79989e-06	1.40109e-05	2.16841e-05	6.44218e-06	1.36481e-05	5.53025	5.55219	1.45285	2.49427	0.855308	4.35954	-0.180824	-0.180109	-0.688304	-0.400918	-1.16917	-0.229382
comp17423_c0_seq1	comp17423_c0_seq1 len=311 path=[0:0-310]	7.09494e-07	1.09727e-06	1.32365e-06	1.17784e-06	2.28242e-06	1.04354e-06	3.26087e-07	1.40798e-07	1.03784e-07	2.40934e-07	2.7125e-07	6.69027e-08	0.459605	0.128317	0.0784076	0.204557	0.118843	0.064111	-2.17578	-7.79319	-12.7539	-4.88862	-8.41447	-15.598
TC376708	TC376708 similar to UniRef100_Q6Z1P3 Cluster: PfkB type carbohydrate kinase protein family-like; n=1; Oryza sativa Japonica Group|Rep: PfkB type carbohydrate kinase protein family-like - Oryza sativa subsp. japonica (Rice), partial (88%)	1.57665e-07	0	0	1.12175e-07	0	0	0	2.11197e-07	2.59461e-07	1.20467e-07	0	2.00708e-07	0	0	0	1.07392	0	0	0	0	0	-0.931165	0	0
comp42949_c0_seq1	comp42949_c0_seq1 len=175 path=[0:0-174]	1.57665e-07	6.09593e-08	0	5.60874e-08	5.70606e-08	0	0	1.40798e-07	5.18922e-08	0	0	0	0	2.30971	0	0	0	0	0	-0.432955	0	0	0	0
comp4540_c0_seq1	comp4540_c0_seq1 len=299 path=[0:0-298]	2.60148e-05	2.46885e-05	4.29242e-05	3.96538e-05	4.11407e-05	3.26245e-05	1.90761e-05	2.06974e-05	2.66726e-05	3.10805e-05	2.9295e-05	3.18457e-05	0.733279	0.838339	0.621389	0.783797	0.712068	0.976127	-1.36374	-1.19284	-1.6093	-1.27584	-1.40436	-1.02446
EY696614	EY696614 similar to UniRef100_A7PGJ7 Cluster: Chromosome chr17 scaffold_16, whole genome shotgun sequence; n=1; Vitis vinifera|Rep: Chromosome chr17 scaffold_16, whole genome shotgun sequence - Vitis vinifera (Grape), partial (49%)	1.57665e-07	6.09593e-08	0	0	0	0	4.8913e-07	7.03992e-08	0	0	0	0	3.10233	1.15485	0	0	0	0	-0.322338	-0.86591	0	0	0	0
CJ785433	CJ785433 similar to UniRef100_Q1IPP3 Cluster: Amino acid transporters precursor; n=1; Acidobacteria bacterium Ellin345|Rep: Amino acid transporters precursor - Acidobacteria bacterium (strain Ellin345), partial (3%)	0	1.82878e-07	0	5.60874e-08	5.70606e-08	1.09847e-07	8.15217e-08	2.81597e-07	2.07569e-07	0	3.39062e-07	1.33805e-07	0	1.53981	0	0	5.94214	1.21811	0	-0.649432	0	0	-0.168289	-0.820945
comp18290_c0_seq1	comp18290_c0_seq1 len=421 path=[0:0-420]	1.18249e-06	1.46302e-06	1.70184e-06	2.46785e-06	2.11124e-06	1.75755e-06	2.28261e-06	1.68958e-06	1.40109e-06	1.92747e-06	1.35625e-06	1.94018e-06	1.93034	1.15485	0.82328	0.781035	0.642394	1.10391	-0.518043	-0.86591	-1.21465	-1.28035	-1.55668	-0.905871
comp34239_c0_seq1	comp34239_c0_seq1 len=286 path=[0:0-285]	2.36498e-07	2.43837e-07	1.89093e-07	5.60874e-08	2.85303e-07	4.39387e-07	1.63043e-07	2.11197e-07	2.59461e-07	2.40934e-07	4.74687e-07	5.35221e-07	0.689408	0.866141	1.37213	4.29569	1.6638	1.21811	-1.45052	-1.15455	-0.728792	-0.232791	-0.601034	-0.820945
TC19134	TC19134 similar to UniRef100_Q7XYW3 Cluster: Seed specific protein Bn15D14A; n=1; Brassica napus|Rep: Seed specific protein Bn15D14A - Brassica napus (Rape), partial (52%)	1.57665e-07	0	0	0	0	0	8.15217e-08	7.03992e-08	0	0	0	0	0.517056	0	0	0	0	0	-1.93403	0	0	0	0	0
comp28676_c0_seq1	comp28676_c0_seq1 len=378 path=[0:0-377]	4.72996e-07	4.26715e-07	1.89093e-07	2.80437e-07	2.28242e-07	3.2954e-07	7.33696e-07	5.63193e-07	3.63246e-07	4.81868e-07	5.425e-07	9.36637e-07	1.55117	1.31983	1.92099	1.71828	2.37686	2.84225	-0.644676	-0.757671	-0.520566	-0.581978	-0.420724	-0.351834
comp17643_c0_seq1	comp17643_c0_seq1 len=328 path=[0:0-327]	2.28615e-06	2.13358e-06	4.16005e-06	4.76743e-06	3.30952e-06	3.67987e-06	4.15761e-06	2.74557e-06	4.30705e-06	3.13214e-06	2.7125e-06	2.94372e-06	1.81861	1.28684	1.03534	0.656988	0.819606	0.799952	-0.549871	-0.777099	-0.965869	-1.5221	-1.2201	-1.25008
comp26959_c0_seq1	comp26959_c0_seq1 len=176 path=[0:0-175]	2.36498e-07	3.04797e-07	3.78187e-07	2.2435e-07	2.85303e-07	3.2954e-07	0	0	0	0	0	2.67611e-07	0	0	0	0	0	0.812072	0	0	0	0	0	-1.23142
comp34457_c0_seq1	comp34457_c0_seq1 len=188 path=[2:0-187] : tr|F2CQY6|F2CQY6_HORVD Predicted protein OS=Hordeum vulgare var. distichum PE=2 SV=1 e-value: 3e-07 blast score: 54.7	0	3.04797e-07	1.89093e-07	1.12175e-07	5.70606e-08	0	1.63043e-07	7.03992e-08	1.55677e-07	1.20467e-07	1.35625e-07	6.69027e-08	0	0.230971	0.82328	1.07392	2.37686	0	0	-4.32955	-1.21465	-0.931165	-0.420724	0
comp36402_c0_seq1	comp36402_c0_seq1 len=387 path=[0:0-386]	3.94163e-07	1.21919e-07	1.13456e-06	3.92612e-07	4.56485e-07	3.84464e-07	2.44565e-06	1.90078e-06	7.78383e-07	8.4327e-07	1.22062e-06	1.40496e-06	6.20467	15.5905	0.686067	2.14785	2.67396	3.65432	-0.161169	-0.0641415	-1.45758	-0.465583	-0.373977	-0.273648
comp13608_c0_seq1	comp13608_c0_seq1 len=499 path=[0:0-498] : tr|C7J1S3|C7J1S3_ORYSJ Os04g0584050 protein (Fragment) OS=Oryza sativa subsp. japonica GN=Os04g0584050 PE=4 SV=1 e-value: 2e-07 blast score: 56.2	2.75914e-06	1.34111e-06	6.24008e-06	4.8796e-06	4.22249e-06	3.18556e-06	8.15217e-06	6.12473e-06	1.55677e-06	5.90289e-06	1.6275e-06	3.41204e-06	2.9546	4.56692	0.249479	1.20971	0.385436	1.0711	-0.338455	-0.218966	-4.00836	-0.826647	-2.59446	-0.933624
comp25625_c0_seq1	comp25625_c0_seq1 len=423 path=[0:0-422] : tr|F2DCG8|F2DCG8_HORVD Predicted protein OS=Hordeum vulgare var. distichum PE=2 SV=1 e-value: 3e-44 blast score: 177	7.88327e-07	7.31512e-07	7.56373e-07	4.48699e-07	5.13545e-07	5.49234e-07	8.15217e-08	0	4.6703e-07	0	2.7125e-07	0	0.103411	0	0.61746	0	0.52819	0	-9.67014	0	-1.61954	0	-1.89326	0
comp8755_c0_seq1	comp8755_c0_seq1 len=326 path=[0:0-325]	9.69642e-06	7.61992e-06	2.53385e-05	4.12242e-05	4.50779e-05	1.78501e-05	7.66304e-06	8.5887e-06	1.82142e-05	2.97554e-05	1.80381e-05	2.70956e-05	0.790296	1.12714	0.718834	0.721793	0.400154	1.51795	-1.26535	-0.887203	-1.39114	-1.38544	-2.49904	-0.658783
comp21662_c0_seq1	comp21662_c0_seq1 len=330 path=[0:0-329]	4.72996e-07	6.09593e-07	1.89093e-07	3.92612e-07	6.84727e-07	6.59081e-07	1.46739e-06	7.74391e-07	4.15138e-07	4.81868e-07	8.81562e-07	4.01416e-07	3.10233	1.27034	2.19541	1.22734	1.28746	0.609054	-0.322338	-0.787191	-0.455495	-0.81477	-0.776721	-1.64189
comp6208_c0_seq1	comp6208_c0_seq1 len=526 path=[0:0-525] : tr|F2DHZ0|F2DHZ0_HORVD Predicted protein OS=Hordeum vulgare var. distichum PE=2 SV=1 e-value: 5e-06 blast score: 51.6	8.98692e-06	7.43704e-06	1.58838e-05	1.30684e-05	1.18686e-05	1.01608e-05	1.02717e-05	9.99668e-06	1.06379e-05	1.06011e-05	8.20531e-06	8.63044e-06	1.14297	1.34417	0.669732	0.811204	0.691345	0.849384	-0.874917	-0.743951	-1.49314	-1.23274	-1.44646	-1.17732
comp5105_c0_seq1	comp5105_c0_seq1 len=422 path=[0:0-421]	8.51393e-06	6.94936e-06	9.26557e-06	1.33488e-05	1.34092e-05	9.22713e-06	6.68478e-06	5.77273e-06	1.03784e-05	1.02397e-05	9.96843e-06	1.01692e-05	0.785159	0.830685	1.12011	0.767088	0.7434	1.1021	-1.27363	-1.20383	-0.892771	-1.30363	-1.34517	-0.90736
TC410246	TC410246 similar to UniRef100_A7QNK5 Cluster: Chromosome chr2 scaffold_132, whole genome shotgun sequence; n=1; Vitis vinifera|Rep: Chromosome chr2 scaffold_132, whole genome shotgun sequence - Vitis vinifera (Grape), partial (39%)	3.15331e-07	4.87675e-07	1.89093e-07	1.12175e-07	2.85303e-07	3.2954e-07	1.63043e-07	7.03992e-08	1.55677e-07	6.02335e-07	1.35625e-07	1.33805e-07	0.517056	0.144357	0.82328	5.36962	0.475371	0.406036	-1.93403	-6.92728	-1.21465	-0.186233	-2.10362	-2.46284
CK212462	CK212462 similar to UniRef100_Q7F1K4 Cluster: p53 binding protein-like; n=2; Oryza sativa Japonica Group|Rep: p53 binding protein-like - Oryza sativa subsp. japonica (Rice), partial (38%)	2.20731e-06	1.52398e-06	1.70184e-06	2.01915e-06	1.5977e-06	1.8674e-06	1.54891e-06	1.61918e-06	2.95786e-06	9.63737e-07	1.69531e-06	2.27469e-06	0.701718	1.06247	1.73804	0.477299	1.0611	1.21811	-1.42507	-0.941206	-0.575362	-2.09512	-0.942421	-0.820945
comp3086_c0_seq1	comp3086_c0_seq1 len=620 path=[0:0-619]	1.63184e-05	1.55446e-05	4.91642e-06	7.01092e-06	7.532e-06	9.28206e-06	4.64674e-06	4.92794e-07	5.18922e-08	1.20467e-07	6.78124e-08	2.67611e-07	0.284755	0.0317019	0.0105549	0.0171828	0.00900325	0.028831	-3.51179	-31.5439	-94.743	-58.1978	-111.071	-34.6849
comp7191_c0_seq2	comp7191_c0_seq2 len=646 path=[0:0-66 67:67-77 78:78-316 317:317-361 362:362-382 383:383-645] : tr|F2DFY2|F2DFY2_HORVD Predicted protein OS=Hordeum vulgare var. distichum PE=4 SV=1 e-value: 5e-07 blast score: 55.5	1.97082e-06	2.86509e-06	4.16005e-06	3.36524e-06	4.27955e-06	2.96586e-06	3.50543e-06	2.60477e-06	1.92001e-06	2.04794e-06	1.085e-06	3.34513e-06	1.77867	0.909141	0.461536	0.608556	0.253531	1.12788	-0.562217	-1.09994	-2.16668	-1.64323	-3.94428	-0.886621
comp13472_c0_seq1	comp13472_c0_seq1 len=232 path=[0:0-231]	1.97082e-06	1.82878e-06	3.21459e-06	3.75786e-06	2.85303e-06	1.97724e-06	2.85326e-06	1.68958e-06	2.33515e-06	2.65028e-06	2.17e-06	1.94018e-06	1.44776	0.923884	0.726423	0.705263	0.760594	0.981254	-0.690724	-1.08239	-1.37661	-1.41791	-1.31476	-1.0191
TC248966	TC248966 weakly similar to UniRef100_A7PZ32 Cluster: Chromosome chr4 scaffold_39, whole genome shotgun sequence; n=1; Vitis vinifera|Rep: Chromosome chr4 scaffold_39, whole genome shotgun sequence - Vitis vinifera (Grape), partial (21%)	1.57665e-07	1.82878e-07	0	5.60874e-08	5.70606e-08	5.49234e-08	8.15217e-08	1.40798e-07	5.18922e-08	0	1.35625e-07	6.69027e-08	0.517056	0.769903	0	0	2.37686	1.21811	-1.93403	-1.29886	0	0	-0.420724	-0.820945
comp5946_c0_seq1	comp5946_c0_seq1 len=528 path=[0:0-527] : tr|F2D5K6|F2D5K6_HORVD Predicted protein OS=Hordeum vulgare var. distichum PE=2 SV=1 e-value: 4e-11 blast score: 68.6	1.66337e-05	1.57885e-05	3.49823e-05	3.25307e-05	3.25816e-05	2.0816e-05	3.25272e-05	2.69629e-05	2.39223e-05	2.86712e-05	2.10897e-05	2.72294e-05	1.9555	1.70776	0.683841	0.881358	0.647288	1.3081	-0.511378	-0.585563	-1.46233	-1.13461	-1.54491	-0.764467
comp28982_c0_seq1	comp28982_c0_seq1 len=162 path=[0:0-161]	1.57665e-06	2.37741e-06	1.32365e-06	1.90697e-06	1.71182e-06	1.8674e-06	2.85326e-06	1.83038e-06	2.17947e-06	1.32514e-06	2.03437e-06	2.07398e-06	1.80969	0.769903	1.64656	0.694891	1.18843	1.11063	-0.552579	-1.29886	-0.607327	-1.43907	-0.841447	-0.900391
TC415525	TC415525 homologue to UniRef100_Q6L5M3 Cluster: Ribosomal protein; n=1; Bromus inermis|Rep: Ribosomal protein - Bromus inermis (Smooth brome grass), partial (96%)	2.28615e-06	2.19454e-06	9.45466e-07	1.45827e-06	1.31239e-06	1.09847e-06	3.42391e-06	2.74557e-06	1.66055e-06	1.20467e-06	1.085e-06	1.87327e-06	1.49768	1.25109	1.75633	0.826095	0.826733	1.70535	-0.6677	-0.799301	-0.569369	-1.21052	-1.20958	-0.586389
comp23611_c0_seq1	comp23611_c0_seq1 len=290 path=[0:0-289]	3.94163e-07	6.09593e-07	0	5.60874e-08	0	4.94311e-07	8.15217e-08	4.22395e-07	5.70814e-07	1.20467e-07	5.425e-07	2.00708e-07	0.206822	0.692913	0	2.14785	0	0.406036	-4.83507	-1.44318	0	-0.465583	0	-2.46284
TC242143	TC242143 UniRef100_A6XMY5 Cluster: Serine hydroxymethyltransferase; n=1; Triticum monococcum|Rep: Serine hydroxymethyltransferase - Triticum monococcum (Einkorn wheat) (Small spelt), partial (35%) #or# TC242343 UniRef100_A6XMY5 Cluster: Serine hydroxymethyltransferase; n=1; Triticum monococcum|Rep: Serine hydroxymethyltransferase - Triticum monococcum (Einkorn wheat) (Small spelt), partial (35%) …	7.09494e-07	1.15823e-06	2.26912e-06	2.2435e-06	2.85303e-06	1.8674e-06	1.875e-06	1.33758e-06	1.55677e-06	1.92747e-06	1.085e-06	1.67257e-06	2.64273	1.15485	0.686067	0.859138	0.380297	0.895668	-0.378397	-0.86591	-1.45758	-1.16396	-2.62952	-1.11649
comp8560_c0_seq1	comp8560_c0_seq1 len=543 path=[0:0-542]	5.28179e-06	5.66922e-06	3.21459e-06	3.98221e-06	3.82306e-06	3.84464e-06	3.58696e-06	4.15355e-06	4.15138e-06	3.85495e-06	4.74687e-06	4.68319e-06	0.679118	0.73265	1.29142	0.968043	1.24164	1.21811	-1.4725	-1.36491	-0.774342	-1.03301	-0.805385	-0.820945
comp42486_c0_seq1	comp42486_c0_seq1 len=147 path=[0:0-146]	0	1.21919e-07	0	5.60874e-08	5.70606e-08	0	3.26087e-07	0	2.07569e-07	0	6.78124e-08	0	0	0	0	0	1.18843	0	0	0	0	0	-0.841447	0
TC405353	TC405353 similar to UniRef100_Q2JGC3 Cluster: Mur ligase; n=1; Frankia sp. CcI3|Rep: Mur ligase - Frankia sp. (strain CcI3), partial (6%)	3.94163e-07	2.43837e-07	5.6728e-07	2.80437e-07	2.28242e-07	2.19694e-07	1.63043e-06	1.40798e-06	4.6703e-07	1.68654e-06	2.7125e-07	1.33805e-06	4.13645	5.77427	0.82328	6.01397	1.18843	6.09054	-0.241753	-0.173182	-1.21465	-0.16628	-0.841447	-0.164189
comp28602_c0_seq1	comp28602_c0_seq1 len=355 path=[0:0-354]	7.88327e-08	7.92471e-07	0	5.04787e-07	3.42364e-07	7.14004e-07	8.15217e-07	5.63193e-07	5.18922e-07	3.61401e-07	3.39062e-07	9.36637e-07	10.3411	0.71068	0	0.715949	0.990357	1.31181	-0.0967014	-1.4071	0	-1.39675	-1.00974	-0.762306
comp28105_c0_seq1	comp28105_c0_seq1 len=199 path=[0:0-198]	3.15331e-07	2.43837e-07	0	0	0	0	3.26087e-07	1.40798e-07	0	0	0	0	1.03411	0.577427	0	0	0	0	-0.967014	-1.73182	0	0	0	0
comp3230_c0_seq2	comp3230_c0_seq2 len=222 path=[0:0-95 96:96-147 669:148-165 644:166-167 172:168-221]	9.45992e-07	1.6459e-06	1.13456e-06	1.00957e-06	6.84727e-07	6.59081e-07	1.05978e-06	7.74391e-07	1.08974e-06	2.40934e-07	1.22062e-06	1.20425e-06	1.12029	0.470496	0.960493	0.23865	1.78264	1.82716	-0.892628	-2.12542	-1.04113	-4.19024	-0.560965	-0.547297
TC396403	TC396403 similar to UniRef100_Q2ESH6 Cluster: Chloroplast 50S ribosomal protein L31; n=1; Saccharum hybrid cultivar|Rep: Chloroplast 50S ribosomal protein L31 - Saccharum hybrid cultivar, partial (55%)	6.30661e-07	9.1439e-07	3.78187e-07	8.41311e-07	1.02709e-06	4.94311e-07	8.15217e-07	1.05599e-06	6.22707e-07	4.81868e-07	6.10312e-07	5.35221e-07	1.29264	1.15485	1.64656	0.572759	0.594214	1.08276	-0.773611	-0.86591	-0.607327	-1.74594	-1.68289	-0.923563
comp1906_c0_seq1	comp1906_c0_seq1 len=476 path=[0:0-475] : tr|Q5XUV7|Q5XUV7_WHEAT Proteasome subunit beta type OS=Triticum aestivum PE=2 SV=1 e-value: 1e-13 blast score: 76.6	2.43593e-05	2.29207e-05	3.51713e-05	4.09999e-05	3.70323e-05	3.32287e-05	3.99457e-05	3.3862e-05	3.91786e-05	3.42127e-05	2.58365e-05	3.37189e-05	1.63985	1.47735	1.11394	0.834457	0.697675	1.01475	-0.609811	-0.676886	-0.897718	-1.19838	-1.43333	-0.98546
CJ600516	CJ600516 similar to UniRef100_A7PHF9 Cluster: Chromosome chr17 scaffold_16, whole genome shotgun sequence; n=1; Vitis vinifera|Rep: Chromosome chr17 scaffold_16, whole genome shotgun sequence - Vitis vinifera (Grape), partial (5%)	2.36498e-07	5.48634e-07	0	5.60874e-07	3.42364e-07	6.04157e-07	5.70652e-07	3.51996e-07	3.63246e-07	2.40934e-07	3.39062e-07	5.35221e-07	2.41293	0.641586	0	0.429569	0.990357	0.885897	-0.414435	-1.55864	0	-2.32791	-1.00974	-1.1288
comp21212_c0_seq1	comp21212_c0_seq1 len=272 path=[0:0-271]	5.51829e-07	5.48634e-07	2.26912e-06	2.18741e-06	1.99712e-06	1.04354e-06	5.05435e-06	4.15355e-06	1.50487e-06	2.65028e-06	2.03437e-06	3.21133e-06	9.15927	7.57071	0.663198	1.21161	1.01865	3.07733	-0.109179	-0.132088	-1.50785	-0.825351	-0.981689	-0.324957
DR737816	DR737816 similar to UniRef100_A9S9R0 Cluster: Predicted protein; n=1; Physcomitrella patens subsp. patens|Rep: Predicted protein - Physcomitrella patens subsp. patens, partial (46%) #or# TC405613 similar to UniRef100_A9S9R0 Cluster: Predicted protein; n=1; Physcomitrella patens subsp. patens|Rep: Predicted protein - Physcomitrella patens subsp. patens, partial (46%)	0	6.09593e-08	0	1.12175e-07	1.71182e-07	1.09847e-07	0	1.40798e-07	2.07569e-07	1.20467e-07	2.03437e-07	2.00708e-07	0	2.30971	0	1.07392	1.18843	1.82716	0	-0.432955	0	-0.931165	-0.841447	-0.547297
TC376844	TC376844	7.88327e-08	6.09593e-08	0	0	5.70606e-08	0	0	7.03992e-08	5.18922e-08	0	0	0	0	1.15485	0	0	0	0	0	-0.86591	0	0	0	0
comp10134_c0_seq1	comp10134_c0_seq1 len=479 path=[0:0-478]	4.72996e-06	4.32811e-06	3.78187e-06	3.53351e-06	3.36658e-06	3.5151e-06	4.80978e-06	5.84313e-06	7.10923e-06	5.42102e-06	4.27218e-06	4.41557e-06	1.01688	1.35004	1.87982	1.53418	1.269	1.25617	-0.983404	-0.740718	-0.531965	-0.651816	-0.788022	-0.796068
TC395012	TC395012 similar to UniRef100_Q4UMF8 Cluster: MFS type sugar transporter; n=1; Rickettsia felis|Rep: MFS type sugar transporter - Rickettsia felis (Rickettsia azadi), partial (16%)	2.04965e-06	1.58494e-06	4.16005e-06	5.49656e-06	4.56485e-06	3.07571e-06	1.79348e-06	2.18237e-06	2.33515e-06	3.01168e-06	3.45843e-06	2.94372e-06	0.875017	1.37694	0.561327	0.54792	0.757623	0.957085	-1.14283	-0.726247	-1.78149	-1.82508	-1.31992	-1.04484
BQ743409	BQ743409	0	0	0	5.60874e-08	5.70606e-08	0	0	0	0	0	6.78124e-08	0	0	0	0	0	1.18843	0	0	0	0	0	-0.841447	0
comp35544_c0_seq1	comp35544_c0_seq1 len=127 path=[0:0-126]	7.88327e-08	1.21919e-07	0	1.12175e-07	0	5.49234e-08	0	0	3.11353e-07	1.20467e-07	6.78124e-08	2.00708e-07	0	0	0	1.07392	0	3.65432	0	0	0	-0.931165	0	-0.273648
comp1822_c0_seq1	comp1822_c0_seq1 len=207 path=[0:0-206]	5.12412e-06	8.41239e-06	1.0211e-05	9.64703e-06	1.32951e-05	1.02158e-05	8.72283e-06	8.5183e-06	7.00545e-06	8.4327e-06	1.00362e-05	1.15073e-05	1.70231	1.01259	0.686067	0.874123	0.754882	1.12642	-0.587438	-0.987567	-1.45758	-1.144	-1.32471	-0.887766
CJ617975	CJ617975	2.36498e-07	3.04797e-07	0	3.36524e-07	4.56485e-07	4.39387e-07	8.15217e-08	4.22395e-07	2.07569e-07	1.20467e-07	1.35625e-07	6.69027e-08	0.344704	1.38583	0	0.357974	0.297107	0.152264	-2.90104	-0.721592	0	-2.7935	-3.36579	-6.56756
comp28919_c0_seq1	comp28919_c0_seq1 len=286 path=[0:0-285] : tr|F6HV11|F6HV11_VITVI Putative uncharacterized protein OS=Vitis vinifera GN=VIT_14s0066g01570 PE=4 SV=1 e-value: 8e-09 blast score: 60.1	3.15331e-07	3.04797e-07	0	0	0	0	2.44565e-07	1.40798e-07	0	0	0	0	0.775583	0.461942	0	0	0	0	-1.28935	-2.16477	0	0	0	0
CK200477	CK200477 UniRef100_Q2L9B8 Cluster: Vacuolar ATP synthase subunit E; n=1; Triticum aestivum|Rep: Vacuolar ATP synthase subunit E - Triticum aestivum (Wheat), partial (81%) #or# TC409475 UniRef100_Q2L9B8 Cluster: Vacuolar ATP synthase subunit E; n=1; Triticum aestivum|Rep: Vacuolar ATP synthase subunit E - Triticum aestivum (Wheat), partial (64%)	7.88327e-08	0	3.78187e-07	5.60874e-08	2.28242e-07	0	1.63043e-07	7.03992e-08	5.18922e-08	0	6.78124e-08	0	2.06822	0	0.137213	0	0.297107	0	-0.483507	0	-7.28792	0	-3.36579	0
comp1737_c0_seq1	comp1737_c0_seq1 len=492 path=[0:0-491] : tr|F2CUQ8|F2CUQ8_HORVD Predicted protein OS=Hordeum vulgare var. distichum PE=2 SV=1 e-value: 1e-15 blast score: 83.2	3.31885e-05	2.5542e-05	4.93533e-05	9.91625e-05	5.46641e-05	6.51392e-05	7.99728e-05	5.54745e-05	5.06987e-05	6.98709e-05	4.64515e-05	6.08814e-05	2.40965	2.1719	1.02726	0.70461	0.849764	0.934636	-0.414998	-0.460427	-0.973464	-1.41922	-1.1768	-1.06994
comp2650_c0_seq1	comp2650_c0_seq1 len=228 path=[0:0-227]	1.39534e-05	1.26186e-05	1.30474e-05	1.77236e-05	1.63764e-05	1.49941e-05	1.83424e-05	1.54878e-05	1.9252e-05	1.24081e-05	1.38337e-05	1.69264e-05	1.31455	1.22738	1.47554	0.700089	0.844737	1.12887	-0.760718	-0.814743	-0.677718	-1.42839	-1.1838	-0.885842
CK215546	CK215546 #or# CK216662	7.88327e-08	0	0	1.68262e-07	0	0	1.63043e-07	0	2.07569e-07	0	6.78124e-08	0	2.06822	0	0	0	0	0	-0.483507	0	0	0	0	0
comp31536_c0_seq1	comp31536_c0_seq1 len=179 path=[0:0-178]	2.36498e-07	1.82878e-07	0	0	0	0	8.15217e-08	1.40798e-07	0	0	0	0	0.344704	0.769903	0	0	0	0	-2.90104	-1.29886	0	0	0	0
comp4301_c0_seq1	comp4301_c0_seq1 len=428 path=[0:0-427]	1.13519e-05	1.21309e-05	9.07648e-06	1.86771e-05	1.67758e-05	1.38407e-05	1.72826e-05	1.79518e-05	1.55677e-05	1.45765e-05	1.26809e-05	1.3715e-05	1.52244	1.47984	1.71517	0.780449	0.755905	0.990921	-0.65684	-0.675749	-0.583034	-1.28131	-1.32292	-1.00916
comp19073_c0_seq1	comp19073_c0_seq1 len=300 path=[0:0-299]	6.30661e-07	7.31512e-07	1.70184e-06	1.45827e-06	1.42652e-06	1.09847e-06	2.44565e-07	5.63193e-07	9.3406e-07	6.02335e-07	1.42406e-06	1.67257e-06	0.387792	0.769903	0.548853	0.413047	0.99828	1.52264	-2.5787	-1.29886	-1.82198	-2.42103	-1.00172	-0.656756
TC412733	TC412733 similar to UniRef100_Q5FSA1 Cluster: Outer membrane channel lipoprotein; n=1; Gluconobacter oxydans|Rep: Outer membrane channel lipoprotein - Gluconobacter oxydans (Gluconobacter suboxydans), partial (7%)	9.45992e-07	3.65756e-07	3.78187e-07	6.73049e-07	7.41788e-07	5.49234e-07	7.33696e-07	3.51996e-07	6.74599e-07	6.02335e-07	6.10312e-07	5.35221e-07	0.775583	0.962379	1.78377	0.894936	0.822758	0.974487	-1.28935	-1.03909	-0.560609	-1.1174	-1.21542	-1.02618
TC250737	TC250737 similar to UniRef100_Q5N9F3 Cluster: BolA-like protein; n=2; Oryza sativa|Rep: BolA-like protein - Oryza sativa subsp. japonica (Rice), partial (93%)	2.36498e-07	1.82878e-07	0	1.12175e-07	1.71182e-07	5.49234e-08	8.15217e-08	1.40798e-07	3.11353e-07	0	1.35625e-07	2.00708e-07	0.344704	0.769903	0	0	0.792286	3.65432	-2.90104	-1.29886	0	0	-1.26217	-0.273648
comp12351_c0_seq1	comp12351_c0_seq1 len=237 path=[0:0-236]	3.15331e-06	3.04797e-06	3.78187e-06	3.87003e-06	2.68185e-06	3.84464e-06	4.07609e-06	3.51996e-06	2.80218e-06	1.56607e-06	2.78031e-06	2.80991e-06	1.29264	1.15485	0.740952	0.404667	1.03671	0.730865	-0.773611	-0.86591	-1.34962	-2.47117	-0.964586	-1.36824
comp6370_c0_seq1	comp6370_c0_seq1 len=419 path=[0:0-418] : tr|F2DME9|F2DME9_HORVD Predicted protein OS=Hordeum vulgare var. distichum PE=2 SV=1 e-value: 7e-16 blast score: 83.6	9.22342e-06	8.35143e-06	1.70184e-05	1.71627e-05	1.44363e-05	1.25225e-05	1.20652e-05	1.23199e-05	1.19871e-05	1.42151e-05	1.18672e-05	1.16411e-05	1.30811	1.47518	0.704362	0.828254	0.822035	0.929609	-0.764464	-0.677884	-1.41973	-1.20736	-1.21649	-1.07572
comp13021_c0_seq1	comp13021_c0_seq1 len=362 path=[0:0-361]	5.43945e-06	5.60826e-06	7.37464e-06	9.08616e-06	9.07264e-06	6.97527e-06	7.98913e-06	5.84313e-06	7.21302e-06	8.31223e-06	5.56062e-06	7.96142e-06	1.46874	1.04188	0.978085	0.914823	0.6129	1.14138	-0.680857	-0.959804	-1.02241	-1.09311	-1.63159	-0.876135
comp1900_c0_seq1	comp1900_c0_seq1 len=496 path=[0:0-495] : tr|A2ZLA6|A2ZLA6_ORYSI Putative uncharacterized protein OS=Oryza sativa subsp. indica GN=OsI_38605 PE=4 SV=1 e-value: 3e-18 blast score: 91.7	2.71973e-05	2.82851e-05	3.74405e-05	3.31477e-05	3.88583e-05	4.02589e-05	2.27446e-05	2.02046e-05	1.02228e-05	3.46945e-05	2.56331e-05	1.96025e-05	0.836281	0.714317	0.273041	1.04667	0.659656	0.486911	-1.19577	-1.39994	-3.66246	-0.955414	-1.51594	-2.05376
TC382540	TC382540 similar to UniRef100_Q8LL84 Cluster: NBS-LRR-like protein; n=1; Oryza sativa Japonica Group|Rep: NBS-LRR-like protein - Oryza sativa subsp. japonica (Rice), partial (18%) #or# TC423355 similar to UniRef100_Q2R8J3 Cluster: NB-ARC domain containing protein, expressed; n=1; Oryza sativa Japonica Group|Rep: NB-ARC domain containing protein, expressed - Oryza sativa subsp. japonica (Rice), pa…	3.94163e-07	3.65756e-07	5.6728e-07	7.29136e-07	3.99424e-07	1.09847e-07	4.07609e-07	6.33592e-07	2.07569e-07	7.22803e-07	2.7125e-07	2.67611e-07	1.03411	1.73228	0.365902	0.991314	0.679102	2.43622	-0.967014	-0.577273	-2.73297	-1.00876	-1.47253	-0.410473
TC252834	TC252834 similar to UniRef100_Q6H3Y3 Cluster: Chaperone protein dnaJ-like; n=2; Oryza sativa|Rep: Chaperone protein dnaJ-like - Oryza sativa subsp. japonica (Rice), partial (56%) #or# TC269955 similar to UniRef100_Q6H3Y3 Cluster: Chaperone protein dnaJ-like; n=2; Oryza sativa|Rep: Chaperone protein dnaJ-like - Oryza sativa subsp. japonica (Rice), partial (60%)	3.15331e-06	2.49933e-06	7.56373e-06	1.39097e-05	1.19827e-05	6.26127e-06	4.07609e-06	4.15355e-06	6.6422e-06	3.49355e-06	5.62843e-06	3.21133e-06	1.29264	1.66186	0.878165	0.251159	0.469712	0.512888	-0.773611	-0.601734	-1.13874	-3.98153	-2.12896	-1.94974
comp29042_c0_seq1	comp29042_c0_seq1 len=218 path=[0:0-217]	2.36498e-07	4.26715e-07	0	0	0	0	1.63043e-07	1.40798e-07	0	0	6.78124e-08	0	0.689408	0.329958	0	0	0	0	-1.45052	-3.03068	0	0	0	0
comp22490_c0_seq1	comp22490_c0_seq1 len=272 path=[0:0-271] : tr|F2CS49|F2CS49_HORVD Predicted protein OS=Hordeum vulgare var. distichum PE=2 SV=1 e-value: 8e-11 blast score: 66.6	7.88327e-07	4.26715e-07	1.70184e-06	7.85224e-06	6.44785e-06	3.5151e-06	1.63043e-07	0	0	3.61401e-07	2.03437e-07	0	0.206822	0	0	0.0460253	0.0315512	0	-4.83507	0	0	-21.7272	-31.6945	0
TC368542	TC368542 UniRef100_Q9XPS9 Cluster: DNA-directed RNA polymerase subunit beta''; n=1; Triticum aestivum|Rep: DNA-directed RNA polymerase subunit beta'' - Triticum aestivum (Wheat), complete	0	1.82878e-07	3.78187e-07	2.2435e-07	1.14121e-07	1.09847e-07	8.15217e-08	0	1.03784e-07	0	1.35625e-07	1.33805e-07	0	0	0.274427	0	1.18843	1.21811	0	0	-3.64396	0	-0.841447	-0.820945
TC423991	TC423991	3.15331e-07	3.65756e-07	1.89093e-07	1.12175e-07	5.70606e-08	1.09847e-07	2.44565e-07	7.03992e-08	5.18922e-08	0	2.03437e-07	0	0.775583	0.192476	0.274427	0	3.56529	0	-1.28935	-5.19546	-3.64396	0	-0.280482	0
comp658_c0_seq1	comp658_c0_seq1 len=658 path=[0:0-657] : tr|F2CSN3|F2CSN3_HORVD Predicted protein (Fragment) OS=Hordeum vulgare var. distichum PE=2 SV=1 e-value: 2e-22 blast score: 106	7.50487e-05	6.71772e-05	9.49248e-05	0.000102808	0.000113094	8.23851e-05	5.77989e-05	6.14585e-05	9.27833e-05	9.60123e-05	7.36443e-05	9.45334e-05	0.770152	0.914871	0.97744	0.933897	0.651177	1.14746	-1.29844	-1.09305	-1.02308	-1.07078	-1.53568	-0.871492
comp11958_c0_seq1	comp11958_c0_seq1 len=221 path=[0:0-220]	1.34016e-06	1.58494e-06	1.13456e-06	7.85224e-07	7.41788e-07	2.03217e-06	8.96739e-07	1.19679e-06	9.3406e-07	1.20467e-06	1.89875e-06	1.20425e-06	0.669131	0.755097	0.82328	1.53418	2.55969	0.592593	-1.49448	-1.32433	-1.21465	-0.651816	-0.390672	-1.6875
comp13508_c0_seq1	comp13508_c0_seq1 len=270 path=[0:0-269]	5.59712e-06	3.47468e-06	7.18554e-06	7.74006e-06	6.96139e-06	6.26127e-06	6.3587e-06	5.49113e-06	4.98165e-06	7.46896e-06	3.39062e-06	6.08814e-06	1.13607	1.58033	0.693288	0.964974	0.487061	0.972349	-0.880231	-0.63278	-1.4424	-1.0363	-2.05313	-1.02844
TC394951	TC394951 UniRef100_Q5XUV4 Cluster: Ubiquitin carrier protein; n=1; Triticum aestivum|Rep: Ubiquitin carrier protein - Triticum aestivum (Wheat), complete #or# TC454205 UniRef100_Q5XUV4 Cluster: Ubiquitin carrier protein; n=1; Triticum aestivum|Rep: Ubiquitin carrier protein - Triticum aestivum (Wheat), complete #or# TC455237 homologue to UniRef100_Q5XUV4 Cluster: Ubiquitin carrier protein; n=1; T…	1.84468e-05	1.62761e-05	2.59058e-05	2.64733e-05	2.3566e-05	1.67516e-05	2.8125e-05	2.61181e-05	1.65536e-05	1.78291e-05	1.26809e-05	2.08067e-05	1.52465	1.60469	0.638993	0.673477	0.538102	1.24207	-0.655888	-0.623175	-1.56496	-1.48483	-1.85838	-0.805107
comp4015_c0_seq1	comp4015_c0_seq1 len=264 path=[0:0-263]	8.90809e-06	1.10946e-05	1.68293e-05	1.45827e-05	1.54064e-05	1.30718e-05	1.50815e-05	1.28126e-05	1.41147e-05	1.4697e-05	1.45119e-05	1.38488e-05	1.69301	1.15485	0.838697	1.00784	0.94194	1.05945	-0.590663	-0.86591	-1.19233	-0.992225	-1.06164	-0.943889
comp38391_c0_seq1	comp38391_c0_seq1 len=139 path=[0:0-138]	1.57665e-07	6.09593e-08	0	1.12175e-07	0	0	8.15217e-08	7.03992e-08	1.03784e-07	1.20467e-07	1.35625e-07	2.00708e-07	0.517056	1.15485	0	1.07392	0	0	-1.93403	-0.86591	0	-0.931165	0	0
TC444910	TC444910 similar to UniRef100_A7QLJ8 Cluster: Chromosome undetermined scaffold_119, whole genome shotgun sequence; n=1; Vitis vinifera|Rep: Chromosome undetermined scaffold_119, whole genome shotgun sequence - Vitis vinifera (Grape), partial (72%)	1.26132e-06	1.15823e-06	3.21459e-06	3.53351e-06	1.94006e-06	2.03217e-06	2.93478e-06	2.53437e-06	1.9719e-06	1.44561e-06	2.03437e-06	1.33805e-06	2.32675	2.18815	0.613424	0.409114	1.04861	0.658437	-0.429784	-0.457008	-1.63019	-2.44431	-0.95364	-1.51875
comp18841_c0_seq1	comp18841_c0_seq1 len=377 path=[0:0-376]	1.02482e-06	1.34111e-06	1.89093e-07	7.85224e-07	7.41788e-07	4.94311e-07	8.15217e-07	9.15189e-07	8.30275e-07	4.81868e-07	9.49374e-07	1.13735e-06	0.79547	0.682414	4.39083	0.61367	1.27985	2.30087	-1.25712	-1.46539	-0.227748	-1.62954	-0.781344	-0.434618
CB304862	CB304862 similar to UniRef100_A9KBV1 Cluster: Transposase insI for insertion sequence element IS30B/C/D; n=1; Coxiella burnetii Dugway 5J108-111|Rep: Transposase insI for insertion sequence element IS30B/C/D - Coxiella burnetii Dugway 5J108-111, partial (5%)	7.88327e-08	6.09593e-08	0	0	0	0	8.15217e-08	0	0	0	0	0	1.03411	0	0	0	0	0	-0.967014	0	0	0	0	0
comp27574_c0_seq1	comp27574_c0_seq1 len=246 path=[0:0-245] : tr|C5YZ75|C5YZ75_SORBI Putative uncharacterized protein Sb09g022350 OS=Sorghum bicolor GN=Sb09g022350 PE=4 SV=1 e-value: 4e-05 blast score: 47.8	4.72996e-07	2.43837e-07	1.89093e-07	5.60874e-07	4.56485e-07	6.04157e-07	5.70652e-07	6.33592e-07	3.11353e-07	0	2.03437e-07	3.34513e-07	1.20646	2.59842	1.64656	0	0.445661	0.553686	-0.828869	-0.384849	-0.607327	0	-2.24386	-1.80608
TC369126	TC369126 UniRef100_P05151 Cluster: Apocytochrome f precursor; n=1; Triticum aestivum|Rep: Apocytochrome f precursor - Triticum aestivum (Wheat), complete	3.94163e-07	3.65756e-07	1.89093e-07	5.04787e-07	9.7003e-07	3.2954e-07	4.8913e-07	9.15189e-07	1.08974e-06	3.61401e-07	1.01719e-06	5.35221e-07	1.24093	2.50218	5.76296	0.715949	1.04861	1.62414	-0.805845	-0.399651	-0.173522	-1.39675	-0.95364	-0.615709
comp8664_c0_seq1	comp8664_c0_seq1 len=423 path=[0:0-145 146:146-162 163:163-234 235:235-422]	7.88327e-07	9.1439e-07	5.86189e-06	1.17784e-06	2.91009e-06	9.33698e-07	8.96739e-07	9.15189e-07	2.12758e-06	1.56607e-06	1.89875e-06	2.27469e-06	1.13752	1.00087	0.362951	1.32962	0.652471	2.43622	-0.879104	-0.999127	-2.75519	-0.752095	-1.53264	-0.410473
comp1303_c0_seq1	comp1303_c0_seq1 len=677 path=[0:0-676] : tr|B3SGZ9|B3SGZ9_9POAL 30S ribosomal protein S7 OS=Aristida adscensionis GN=rps7 PE=3 SV=1 e-value: 1e-80 blast score: 300	3.89433e-05	5.19373e-05	3.06331e-05	5.96209e-05	4.49067e-05	5.43742e-05	6.29348e-05	4.23803e-05	6.5955e-05	2.54186e-05	7.24237e-05	3.75324e-05	1.61606	0.815989	2.15306	0.426336	1.61276	0.690261	-0.618789	-1.22551	-0.464455	-2.34557	-0.620055	-1.44873
comp37378_c0_seq1	comp37378_c0_seq1 len=191 path=[0:0-190]	1.57665e-07	1.21919e-07	1.89093e-07	0	5.70606e-08	5.49234e-08	0	0	0	1.20467e-07	0	6.69027e-08	0	0	0	0	0	1.21811	0	0	0	0	0	-0.820945
TC399137	TC399137 similar to UniRef100_Q5P0H8 Cluster: Phenylacetyl-CoA:acceptor oxidoreductase; n=1; Azoarcus sp. EbN1|Rep: Phenylacetyl-CoA:acceptor oxidoreductase - Azoarcus sp. (strain EbN1) (Aromatoleum aromaticum (strain EbN1)), partial (6%)	7.88327e-08	3.65756e-07	3.78187e-07	2.2435e-07	5.70606e-08	3.2954e-07	4.8913e-07	2.11197e-07	4.6703e-07	2.40934e-07	2.03437e-07	2.00708e-07	6.20467	0.577427	1.23492	1.07392	3.56529	0.609054	-0.161169	-1.73182	-0.809769	-0.931165	-0.280482	-1.64189
comp46088_c0_seq1	comp46088_c0_seq1 len=179 path=[0:0-178]	0	1.82878e-07	1.89093e-07	3.92612e-07	2.28242e-07	5.49234e-08	8.15217e-08	7.03992e-08	5.18922e-08	1.20467e-07	1.35625e-07	0	0	0.384951	0.274427	0.306835	0.594214	0	0	-2.59773	-3.64396	-3.25908	-1.68289	0
comp3310_c0_seq1	comp3310_c0_seq1 len=559 path=[0:0-558]	1.93928e-05	2.1031e-05	4.36805e-05	4.27947e-05	3.54917e-05	3.18556e-05	3.88043e-05	3.09052e-05	2.04455e-05	3.24056e-05	2.21069e-05	2.95041e-05	2.00096	1.46951	0.46807	0.757235	0.622874	0.926182	-0.499759	-0.680499	-2.13643	-1.32059	-1.60546	-1.0797
comp15225_c0_seq1	comp15225_c0_seq1 len=133 path=[0:0-132]	3.15331e-07	2.43837e-07	1.70184e-06	4.71134e-06	9.1297e-07	4.06433e-06	7.33696e-07	5.63193e-07	3.63246e-07	3.61401e-06	6.10312e-07	9.36637e-07	2.32675	2.30971	0.213443	0.767088	0.668491	0.230453	-0.429784	-0.432955	-4.68509	-1.30363	-1.49591	-4.33928
comp37988_c0_seq1	comp37988_c0_seq1 len=272 path=[0:0-271] : tr|B9HKI4|B9HKI4_POPTR Predicted protein OS=Populus trichocarpa GN=POPTRDRAFT_832463 PE=4 SV=1 e-value: 5e-11 blast score: 67.4	3.15331e-07	1.82878e-07	0	0	0	0	1.63043e-07	1.40798e-07	0	0	0	0	0.517056	0.769903	0	0	0	0	-1.93403	-1.29886	0	0	0	0
comp14167_c0_seq1	comp14167_c0_seq1 len=537 path=[0:0-536]	2.28615e-06	2.56029e-06	1.89093e-06	1.62653e-06	1.883e-06	2.80109e-06	1.875e-06	1.68958e-06	2.23137e-06	1.68654e-06	3.05156e-06	2.67611e-06	0.820157	0.659917	1.18003	1.03689	1.62058	0.955379	-1.21928	-1.51534	-0.847433	-0.964421	-0.617061	-1.04671
comp37148_c0_seq1	comp37148_c0_seq1 len=138 path=[0:0-137]	0	1.21919e-07	0	0	2.28242e-07	0	1.63043e-07	0	1.03784e-07	1.20467e-07	1.35625e-07	6.69027e-08	0	0	0	0	0.594214	0	0	0	0	0	-1.68289	0
comp771_c0_seq1	comp771_c0_seq1 len=569 path=[0:0-568] : tr|F2CRS1|F2CRS1_HORVD Predicted protein (Fragment) OS=Hordeum vulgare var. distichum PE=2 SV=1 e-value: 3e-11 blast score: 68.9	0.000249348	0.00030693	4.93533e-05	6.79218e-05	0.000115034	0.000149831	0.000132473	0.000102501	4.34857e-05	3.28875e-05	0.000113654	7.74733e-05	0.531278	0.333956	0.881109	0.484197	0.987999	0.517071	-1.88226	-2.99441	-1.13493	-2.06528	-1.01215	-1.93397
comp16976_c0_seq1	comp16976_c0_seq1 len=341 path=[0:0-340] : tr|A8Y9C9|A8Y9C9_LOLPR 50S ribosomal protein L23, chloroplastic OS=Lolium perenne GN=rpl23 PE=3 SV=1 e-value: 6e-22 blast score: 103	9.45992e-07	9.1439e-07	9.45466e-07	2.63611e-06	1.42652e-06	2.91094e-06	1.71196e-06	4.92794e-07	5.91571e-06	2.40934e-06	7.25593e-06	4.9508e-06	1.80969	0.538932	6.25693	0.913977	5.08647	1.70075	-0.552579	-1.85552	-0.159823	-1.09412	-0.1966	-0.587974
comp2857_c0_seq2	comp2857_c0_seq2 len=221 path=[202:0-121 324:122-161 166:162-220] : tr|B6SPD9|B6SPD9_MAIZE Putative uncharacterized protein OS=Zea mays PE=2 SV=1 e-value: 6e-06 blast score: 50.4	5.05317e-05	4.32202e-05	9.09539e-05	6.94362e-05	7.88007e-05	4.65751e-05	6.3587e-05	6.6316e-05	4.78965e-05	8.23995e-05	4.43493e-05	6.27547e-05	1.25836	1.53438	0.526602	1.18669	0.562804	1.34739	-0.794687	-0.651731	-1.89897	-0.842677	-1.77682	-0.742176
TC385420	TC385420 weakly similar to UniRef100_A7PWH1 Cluster: Chromosome chr8 scaffold_34, whole genome shotgun sequence; n=1; Vitis vinifera|Rep: Chromosome chr8 scaffold_34, whole genome shotgun sequence - Vitis vinifera (Grape), partial (6%)	7.88327e-08	1.21919e-07	2.26912e-06	2.80437e-07	1.14121e-07	2.19694e-07	6.3587e-06	8.79989e-06	1.03266e-05	9.63737e-06	1.00362e-05	1.05706e-05	80.6607	72.1784	4.55091	34.3655	87.9437	48.1153	-0.0123976	-0.0138546	-0.219736	-0.0290989	-0.0113709	-0.0207834
comp29370_c0_seq1	comp29370_c0_seq1 len=314 path=[0:0-313] : tr|F6H0D6|F6H0D6_VITVI Putative uncharacterized protein OS=Vitis vinifera GN=VIT_18s0001g00820 PE=4 SV=1 e-value: 1e-32 blast score: 139	2.36498e-07	4.26715e-07	0	0	0	0	1.63043e-07	4.22395e-07	0	0	0	0	0.689408	0.989875	0	0	0	0	-1.45052	-1.01023	0	0	0	0
comp36595_c0_seq1	comp36595_c0_seq1 len=131 path=[0:0-130]	7.88327e-08	1.21919e-07	1.89093e-07	5.60874e-08	1.14121e-07	1.6477e-07	1.63043e-07	2.11197e-07	1.55677e-07	2.40934e-07	2.03437e-07	1.33805e-07	2.06822	1.73228	0.82328	4.29569	1.78264	0.812072	-0.483507	-0.577273	-1.21465	-0.232791	-0.560965	-1.23142
comp5399_c0_seq1	comp5399_c0_seq1 len=387 path=[0:0-386] : tr|F2DE13|F2DE13_HORVD Predicted protein OS=Hordeum vulgare var. distichum PE=2 SV=1 e-value: 9e-18 blast score: 89.7	5.3212e-05	4.69996e-05	4.51933e-05	8.07098e-05	5.70606e-05	8.04079e-05	7.19022e-05	5.45593e-05	4.77408e-05	4.2284e-05	4.78756e-05	6.16173e-05	1.35124	1.16085	1.05637	0.523901	0.83903	0.76631	-0.740062	-0.861441	-0.946638	-1.90876	-1.19185	-1.30496
comp2075_c0_seq1	comp2075_c0_seq1 len=550 path=[0:0-549]	2.60148e-05	3.27352e-05	2.0233e-05	2.17058e-05	2.04848e-05	3.00431e-05	2.28261e-05	2.09789e-05	1.85774e-05	1.61426e-05	2.33953e-05	2.28138e-05	0.877428	0.640869	0.918175	0.743699	1.14208	0.759369	-1.13969	-1.56038	-1.08912	-1.34463	-0.875593	-1.31688
comp25232_c0_seq1	comp25232_c0_seq1 len=296 path=[0:0-295]	3.94163e-07	5.48634e-07	0	2.80437e-07	2.85303e-07	5.49234e-07	8.15217e-08	2.11197e-07	3.63246e-07	2.40934e-07	6.10312e-07	7.35929e-07	0.206822	0.384951	0	0.859138	2.13917	1.33992	-4.83507	-2.59773	0	-1.16396	-0.467471	-0.746314
comp18459_c0_seq1	comp18459_c0_seq1 len=303 path=[0:0-302] : tr|A9PFD6|A9PFD6_POPTR Putative uncharacterized protein OS=Populus trichocarpa PE=2 SV=1 e-value: 9e-13 blast score: 73.2	7.09494e-07	9.75349e-07	0	0	0	0	5.70652e-07	7.03992e-07	0	0	0	0	0.804309	0.721784	0	0	0	0	-1.2433	-1.38546	0	0	0	0
comp6304_c0_seq1	comp6304_c0_seq1 len=328 path=[0:0-327] : tr|Q0JPG1|Q0JPG1_ORYSJ Os01g0224400 protein (Fragment) OS=Oryza sativa subsp. japonica GN=Os01g0224400 PE=3 SV=1 e-value: 3e-12 blast score: 71.6	6.14895e-06	5.5473e-06	4.34914e-06	6.00135e-06	7.07552e-06	4.72341e-06	4.07609e-06	4.50555e-06	8.61411e-06	6.50522e-06	4.47562e-06	5.82053e-06	0.662892	0.812205	1.98064	1.08396	0.632551	1.23227	-1.50854	-1.23122	-0.504886	-0.922543	-1.5809	-0.811509
comp5832_c0_seq1	comp5832_c0_seq1 len=352 path=[0:0-351]	1.20614e-05	9.75349e-06	1.38038e-05	1.59849e-05	1.47216e-05	1.34562e-05	1.58967e-05	1.54174e-05	1.52563e-05	1.24081e-05	1.1935e-05	1.27115e-05	1.31798	1.58071	1.10522	0.776239	0.810711	0.944655	-0.758734	-0.632628	-0.904793	-1.28826	-1.23349	-1.05859
comp33314_c0_seq1	comp33314_c0_seq1 len=152 path=[0:0-151] : tr|F2CSP5|F2CSP5_HORVD Predicted protein OS=Hordeum vulgare var. distichum PE=2 SV=1 e-value: 6e-23 blast score: 107	7.88327e-08	1.82878e-07	1.89093e-07	5.60874e-08	5.70606e-08	1.6477e-07	8.15217e-08	3.51996e-07	5.18922e-08	1.20467e-07	6.78124e-08	6.69027e-08	1.03411	1.92476	0.274427	2.14785	1.18843	0.406036	-0.967014	-0.519546	-3.64396	-0.465583	-0.841447	-2.46284
comp5876_c0_seq1	comp5876_c0_seq1 len=646 path=[0:0-70 71:71-94 95:95-607 643:608-645]	4.61959e-05	4.17571e-05	5.4837e-05	2.88289e-05	3.32093e-05	3.45468e-05	6.46467e-05	6.06137e-05	4.10467e-05	3.46945e-05	3.42453e-05	3.05745e-05	1.3994	1.45158	0.748522	1.20346	1.0312	0.885017	-0.71459	-0.688906	-1.33597	-0.830936	-0.969747	-1.12992
comp26655_c0_seq1	comp26655_c0_seq1 len=310 path=[0:0-309]	4.72996e-07	4.87675e-07	0	0	0	0	4.07609e-07	7.74391e-07	0	0	0	0	0.861759	1.58792	0	0	0	0	-1.16042	-0.629753	0	0	0	0
comp5872_c0_seq1	comp5872_c0_seq1 len=348 path=[0:0-347]	2.55418e-05	2.38961e-05	2.77967e-05	3.47181e-05	2.96715e-05	2.78462e-05	3.65217e-05	3.351e-05	4.44197e-05	2.22864e-05	2.9295e-05	3.42542e-05	1.42988	1.40232	1.59802	0.641925	0.98731	1.23012	-0.699358	-0.713102	-0.625774	-1.55781	-1.01285	-0.812928
comp7465_c0_seq1	comp7465_c0_seq1 len=400 path=[0:0-247 450:248-249 250:250-273 274:274-297 298:298-399] : tr|F2CX19|F2CX19_HORVD Predicted protein OS=Hordeum vulgare var. distichum PE=2 SV=1 e-value: 3e-32 blast score: 137	4.88762e-06	6.33977e-06	5.4837e-06	9.19833e-06	7.2467e-06	7.57943e-06	8.31522e-06	8.0959e-06	5.65625e-06	7.46896e-06	4.95031e-06	4.21487e-06	1.70128	1.277	1.03147	0.811991	0.683112	0.556093	-0.587793	-0.783084	-0.969494	-1.23154	-1.46389	-1.79826
CA644641	CA644641 similar to UniRef100_Q9XGU8 Cluster: NADP-specific isocitrate dehydrogenase; n=3; Oryza sativa|Rep: NADP-specific isocitrate dehydrogenase - Oryza sativa (Rice), partial (13%)	0	1.21919e-07	3.78187e-07	5.60874e-08	2.85303e-07	5.49234e-08	1.63043e-07	2.81597e-07	1.03784e-07	1.20467e-07	1.35625e-07	2.00708e-07	0	2.30971	0.274427	2.14785	0.475371	3.65432	0	-0.432955	-3.64396	-0.465583	-2.10362	-0.273648
comp4026_c0_seq1	comp4026_c0_seq1 len=499 path=[0:0-277 278:278-279 280:280-498] : tr|F2DSW4|F2DSW4_HORVD Predicted protein OS=Hordeum vulgare var. distichum PE=2 SV=1 e-value: 6e-13 blast score: 74.3	2.42805e-05	2.50543e-05	3.91423e-05	3.15211e-05	3.39511e-05	3.04825e-05	5.24185e-05	5.76569e-05	5.20998e-05	3.71039e-05	4.54343e-05	4.80361e-05	2.15888	2.30128	1.33104	1.17711	1.33823	1.57586	-0.463204	-0.434541	-0.751295	-0.849537	-0.747256	-0.634575
comp17775_c0_seq1	comp17775_c0_seq1 len=610 path=[0:0-609]	2.44381e-06	1.88974e-06	4.34914e-06	7.34745e-06	5.02133e-06	3.13063e-06	5.13587e-06	4.29435e-06	3.47678e-06	5.54149e-06	2.57687e-06	4.9508e-06	2.10158	2.27246	0.799417	0.754206	0.513185	1.5814	-0.475832	-0.440053	-1.25091	-1.3259	-1.94862	-0.63235
comp20838_c0_seq1	comp20838_c0_seq1 len=180 path=[9:0-179] : tr|F2D8N3|F2D8N3_HORVD Predicted protein OS=Hordeum vulgare var. distichum PE=2 SV=1 e-value: 2e-08 blast score: 58.5	0	2.43837e-07	0	1.12175e-07	0	1.6477e-07	1.63043e-07	1.40798e-07	1.03784e-07	0	1.35625e-07	1.33805e-07	0	0.577427	0	0	0	0.812072	0	-1.73182	0	0	0	-1.23142
comp1196_c0_seq1	comp1196_c0_seq1 len=310 path=[0:0-309]	4.67478e-05	3.88311e-05	8.84956e-05	7.67276e-05	0.000114292	6.04707e-05	2.95924e-05	3.09052e-05	9.21087e-05	6.83048e-05	9.83281e-05	9.85476e-05	0.633023	0.795889	1.04083	0.890226	0.86032	1.62968	-1.57972	-1.25646	-0.960774	-1.12331	-1.16236	-0.613619
comp12720_c0_seq1	comp12720_c0_seq1 len=306 path=[0:0-305]	1.65549e-06	2.07262e-06	1.51275e-06	3.70177e-06	2.45361e-06	2.25186e-06	1.875e-06	1.47838e-06	1.55677e-06	1.92747e-06	1.55969e-06	2.07398e-06	1.1326	0.713292	1.0291	0.52069	0.635671	0.921009	-0.882926	-1.40195	-0.971723	-1.92053	-1.57314	-1.08577
BE421365	BE421365 UniRef100_Q00434 Cluster: Oxygen-evolving enhancer protein 2, chloroplast precursor; n=1; Triticum aestivum|Rep: Oxygen-evolving enhancer protein 2, chloroplast precursor - Triticum aestivum (Wheat), partial (57%) #or# BG343513 homologue to UniRef100_Q00434 Cluster: Oxygen-evolving enhancer protein 2, chloroplast precursor; n=1; Triticum aestivum|Rep: Oxygen-evolving enhancer protein 2, …	4.46193e-05	4.33421e-05	2.77967e-05	2.46224e-05	2.58485e-05	3.14162e-05	2.95924e-05	2.97788e-05	2.67245e-05	2.98758e-05	2.88881e-05	2.3349e-05	0.66322	0.687065	0.961427	1.21336	1.11759	0.743216	-1.5078	-1.45547	-1.04012	-0.824156	-0.894779	-1.3455
GH208753	GH208753 UniRef100_Q9SDM1 Cluster: Chlorophyll a/b binding protein precursor; n=1; Hordeum vulgare|Rep: Chlorophyll a/b binding protein precursor - Hordeum vulgare (Barley), partial (49%) #or# TC244002 UniRef100_Q36717 Cluster: Light-harvesting complex I; n=1; Hordeum vulgare|Rep: Light-harvesting complex I - Hordeum vulgare (Barley), partial (66%)	7.80443e-05	7.1932e-05	3.46041e-05	2.42858e-05	2.86444e-05	3.33934e-05	5.97554e-05	7.50455e-05	3.04088e-05	3.75857e-05	3.05834e-05	2.96379e-05	0.76566	1.04328	0.878765	1.54764	1.06769	0.887536	-1.30606	-0.958512	-1.13796	-0.646145	-0.9366	-1.12671
BQ169733	BQ169733 similar to UniRef100_Q5JMG8 Cluster: Copper chaperone (CCH)-related protein-like; n=1; Oryza sativa Japonica Group|Rep: Copper, partial (21%)	1.02482e-06	7.92471e-07	1.89093e-07	5.04787e-07	9.1297e-07	1.53786e-06	1.63043e-06	5.63193e-07	3.16543e-06	7.22803e-07	1.6275e-06	1.67257e-06	1.59094	0.71068	16.74	1.4319	1.78264	1.0876	-0.628559	-1.4071	-0.0597371	-0.698374	-0.560965	-0.919459
comp12942_c0_seq1	comp12942_c0_seq1 len=203 path=[0:0-202]	1.26132e-06	1.46302e-06	7.56373e-07	1.73871e-06	2.45361e-06	1.92232e-06	1.1413e-06	1.26718e-06	1.66055e-06	1.56607e-06	1.35625e-06	1.67257e-06	0.904847	0.866141	2.19541	0.90071	0.552757	0.870077	-1.10516	-1.15455	-0.455495	-1.11024	-1.80911	-1.14932
comp28381_c0_seq1	comp28381_c0_seq1 len=161 path=[0:0-160]	1.57665e-07	6.09593e-08	0	1.12175e-07	2.28242e-07	5.49234e-08	3.26087e-07	1.40798e-07	2.07569e-07	3.61401e-07	0	0	2.06822	2.30971	0	3.22177	0	0	-0.483507	-0.432955	0	-0.310388	0	0
comp4980_c0_seq2	comp4980_c0_seq2 len=307 path=[0:0-275 276:276-306]	1.65549e-06	1.6459e-06	6.80736e-06	8.97398e-07	3.25245e-06	2.96586e-06	7.82609e-06	1.28126e-05	6.6941e-06	6.02335e-06	9.42593e-06	1.07044e-05	4.72737	7.78457	0.983362	6.71202	2.8981	3.60921	-0.211534	-0.128459	-1.01692	-0.148986	-0.345054	-0.277069
TC383048	TC383048 homologue to UniRef100_Q9ATQ4 Cluster: TAK33; n=1; Triticum aestivum|Rep: TAK33 - Triticum aestivum (Wheat), partial (27%)	2.36498e-07	9.1439e-07	1.90984e-05	6.16961e-07	6.27667e-07	7.68928e-07	6.52989e-05	6.08249e-05	2.48564e-05	0.000104445	1.34947e-05	3.22471e-05	276.108	66.5196	1.30149	169.289	21.4998	41.9377	-0.00362177	-0.0150332	-0.768351	-0.00590705	-0.0465122	-0.0238449
comp3779_c0_seq1	comp3779_c0_seq1 len=390 path=[0:0-389] : tr|E9LD15|E9LD15_WHEAT ABC1 protein kinase OS=Triticum aestivum PE=2 SV=1 e-value: 2e-15 blast score: 81.6	1.02482e-05	9.50966e-06	1.96657e-05	2.37811e-05	2.17972e-05	1.33464e-05	1.01087e-05	1.08415e-05	1.58271e-05	1.48175e-05	1.53934e-05	1.76623e-05	0.986383	1.14005	0.804809	0.623078	0.706213	1.32338	-1.0138	-0.877156	-1.24253	-1.60494	-1.416	-0.755643
comp37828_c0_seq1	comp37828_c0_seq1 len=169 path=[0:0-168]	1.57665e-07	1.21919e-07	0	0	0	0	0	7.03992e-08	0	0	0	0	0	0.577427	0	0	0	0	0	-1.73182	0	0	0	0
comp26656_c0_seq1	comp26656_c0_seq1 len=407 path=[0:0-406]	4.72996e-07	6.70553e-07	0	0	0	0	7.33696e-07	5.63193e-07	0	0	0	0	1.55117	0.839894	0	0	0	0	-0.644676	-1.19063	0	0	0	0
CD054170	CD054170 weakly similar to UniRef100_A9T4K7 Cluster: Predicted protein; n=1; Physcomitrella patens subsp. patens|Rep: Predicted protein - Physcomitrella patens subsp. patens, partial (12%)	1.57665e-07	0	0	1.12175e-07	1.14121e-07	5.49234e-08	0	7.03992e-08	5.18922e-08	1.20467e-07	6.78124e-08	6.69027e-08	0	0	0	1.07392	0.594214	1.21811	0	0	0	-0.931165	-1.68289	-0.820945
comp3684_c0_seq1	comp3684_c0_seq1 len=412 path=[0:0-411]	9.93291e-06	1.17652e-05	1.2102e-05	1.09931e-05	1.19257e-05	1.02707e-05	1.3288e-05	1.26014e-05	1.0119e-05	9.1555e-06	1.20028e-05	1.20425e-05	1.33778	1.07108	0.836144	0.832838	1.00647	1.17251	-0.747508	-0.933635	-1.19597	-1.20071	-0.993573	-0.852871
comp5380_c0_seq1	comp5380_c0_seq1 len=696 path=[0:0-695] : tr|F2DPG7|F2DPG7_HORVD Predicted protein (Fragment) OS=Hordeum vulgare var. distichum PE=2 SV=1 e-value: 5e-14 blast score: 79.0	1.63184e-05	1.68248e-05	2.06112e-05	2.22106e-05	2.29384e-05	1.6477e-05	1.875e-05	1.97822e-05	2.11201e-05	1.74677e-05	1.81737e-05	1.94018e-05	1.14901	1.17578	1.02469	0.786459	0.792286	1.1775	-0.870313	-0.850502	-0.975901	-1.27152	-1.26217	-0.849254
comp37389_c0_seq1	comp37389_c0_seq1 len=149 path=[0:0-148]	0	1.21919e-07	3.78187e-07	1.68262e-07	0	0	4.8913e-07	3.51996e-07	3.63246e-07	2.40934e-07	2.03437e-07	4.01416e-07	0	2.88714	0.960493	1.4319	0	0	0	-0.346364	-1.04113	-0.698374	0	0
comp2249_c0_seq1	comp2249_c0_seq1 len=342 path=[0:0-341]	3.38192e-05	3.93797e-05	3.29022e-05	4.13364e-05	4.5192e-05	3.33934e-05	3.7337e-05	3.72412e-05	3.26921e-05	2.74665e-05	3.98737e-05	3.80676e-05	1.10402	0.945694	0.993614	0.664463	0.882318	1.13997	-0.905784	-1.05743	-1.00643	-1.50498	-1.13338	-0.877214
comp14720_c0_seq1	comp14720_c0_seq1 len=184 path=[24:0-183]	6.30661e-07	5.48634e-07	9.45466e-07	1.12175e-06	8.55909e-07	7.68928e-07	6.52174e-07	7.03992e-07	1.08974e-06	1.0842e-06	3.39062e-07	1.47186e-06	1.03411	1.28317	1.15259	0.966531	0.396143	1.91417	-0.967014	-0.779319	-0.86761	-1.03463	-2.52434	-0.52242
TC452727	TC452727 similar to UniRef100_A8PF72 Cluster: Predicted protein; n=1; Coprinopsis cinerea okayama7#130|Rep: Predicted protein - Coprinopsis cinerea okayama7#130, partial (4%)	3.97317e-05	3.87092e-05	4.53824e-05	5.08152e-05	5.75171e-05	4.52569e-05	3e-05	2.91453e-05	3.93343e-05	3.86699e-05	4.36712e-05	4.16804e-05	0.755065	0.752929	0.866731	0.760992	0.759274	0.920973	-1.32439	-1.32815	-1.15376	-1.31407	-1.31705	-1.08581
comp2810_c0_seq1	comp2810_c0_seq1 len=458 path=[0:0-457] : tr|B9FPI3|B9FPI3_ORYSJ Putative uncharacterized protein OS=Oryza sativa subsp. japonica GN=OsJ_18482 PE=4 SV=1 e-value: 2e-05 blast score: 48.9	2.64089e-05	3.18208e-05	3.19568e-05	3.14089e-05	3.3894e-05	2.92193e-05	3.61141e-05	4.06203e-05	3.26921e-05	2.45753e-05	3.96703e-05	3.79338e-05	1.3675	1.27653	1.02301	0.78243	1.17042	1.29825	-0.731263	-0.783371	-0.977507	-1.27807	-0.854393	-0.77027
comp9046_c0_seq1	comp9046_c0_seq1 len=359 path=[0:0-358]	1.04059e-05	9.93637e-06	8.13101e-06	1.64336e-05	1.56917e-05	1.40604e-05	1.41848e-05	1.2883e-05	1.06898e-05	1.06011e-05	1.13925e-05	1.35812e-05	1.36315	1.29655	1.31469	0.645087	0.726022	0.965922	-0.733597	-0.771275	-0.760633	-1.55018	-1.37737	-1.03528
comp26694_c0_seq1	comp26694_c0_seq1 len=228 path=[0:0-227] : tr|Q60DD3|Q60DD3_ORYSJ Putative uncharacterized protein OSJNBb0013C14.16 OS=Oryza sativa subsp. japonica GN=OSJNBb0013C14.16 PE=4 SV=1 e-value: 0.001 blast score: 43.1	2.36498e-07	6.09593e-07	5.6728e-07	7.29136e-07	5.70606e-07	6.04157e-07	5.70652e-07	3.51996e-07	3.63246e-07	4.81868e-07	5.425e-07	1.33805e-07	2.41293	0.577427	0.640329	0.660876	0.950743	0.221474	-0.414435	-1.73182	-1.5617	-1.51314	-1.05181	-4.5152
comp5577_c0_seq1	comp5577_c0_seq1 len=233 path=[0:0-232] : tr|F2CY09|F2CY09_HORVD Predicted protein OS=Hordeum vulgare var. distichum PE=2 SV=1 e-value: 2e-04 blast score: 45.8	6.62194e-06	6.03497e-06	4.34914e-06	6.95484e-06	5.9343e-06	5.93173e-06	7.25544e-06	6.12473e-06	6.38274e-06	7.22803e-06	4.95031e-06	6.55646e-06	1.09567	1.01487	1.46759	1.03928	0.834185	1.10532	-0.912687	-0.985346	-0.681391	-0.962204	-1.19877	-0.904715
comp18376_c0_seq1	comp18376_c0_seq1 len=344 path=[0:0-343]	6.30661e-07	1.15823e-06	9.45466e-07	1.51436e-06	1.14121e-06	1.59278e-06	3.26087e-07	4.92794e-07	4.82598e-06	1.80701e-06	2.17e-06	2.4085e-06	0.517056	0.425473	5.10433	1.19325	1.90149	1.51213	-1.93403	-2.35033	-0.195912	-0.838049	-0.525905	-0.661317
comp3453_c0_seq1	comp3453_c0_seq1 len=369 path=[0:0-368] : tr|F2DRS9|F2DRS9_HORVD Predicted protein (Fragment) OS=Hordeum vulgare var. distichum PE=2 SV=1 e-value: 4e-09 blast score: 61.2	2.64089e-05	2.49933e-05	3.51713e-05	3.6569e-05	4.31949e-05	3.72381e-05	2.20924e-05	2.40061e-05	3.46121e-05	3.74653e-05	3.56015e-05	3.99409e-05	0.83655	0.960501	0.9841	1.02451	0.824207	1.07258	-1.19539	-1.04112	-1.01616	-0.976077	-1.21329	-0.93233
TC240529	TC240529 similar to UniRef100_A9U537 Cluster: Predicted protein; n=1; Physcomitrella patens subsp. patens|Rep: Predicted protein - Physcomitrella patens subsp. patens, partial (98%) #or# TC273941 similar to UniRef100_A7TD57 Cluster: Predicted protein; n=1; Nematostella vectensis|Rep: Predicted protein - Nematostella vectensis (Starlet sea anemone), partial (89%)	8.67159e-07	1.09727e-06	2.45821e-06	1.62653e-06	2.56773e-06	1.09847e-06	8.15217e-07	7.03992e-07	1.76434e-06	1.0842e-06	1.49187e-06	1.53876e-06	0.940101	0.641586	0.717731	0.666573	0.581009	1.40082	-1.06372	-1.55864	-1.39328	-1.50021	-1.72114	-0.713865
comp22524_c0_seq1	comp22524_c0_seq1 len=166 path=[0:0-165]	7.09494e-07	1.82878e-07	1.13456e-06	1.40218e-06	3.99424e-07	7.68928e-07	7.33696e-07	5.63193e-07	6.74599e-07	3.61401e-07	5.425e-07	6.69027e-07	1.03411	3.07961	0.594591	0.257742	1.3582	0.870077	-0.967014	-0.324716	-1.68183	-3.87986	-0.736266	-1.14932
comp28379_c0_seq1	comp28379_c0_seq1 len=260 path=[0:0-259]	2.52265e-06	1.82878e-06	3.21459e-06	4.31873e-06	2.68185e-06	3.62494e-06	6.11413e-06	5.63193e-06	4.82598e-06	4.57775e-06	3.59406e-06	5.55292e-06	2.4237	3.07961	1.50127	1.05998	1.34014	1.53186	-0.412593	-0.324716	-0.666101	-0.943418	-0.746189	-0.6528
comp11098_c0_seq1	comp11098_c0_seq1 len=319 path=[0:0-318]	1.52935e-05	1.56056e-05	2.28803e-05	2.87167e-05	2.60767e-05	2.10357e-05	2.33967e-05	2.14717e-05	1.76434e-05	2.1925e-05	1.54612e-05	2.08736e-05	1.52985	1.3759	0.771116	0.763492	0.592914	0.992297	-0.653661	-0.726797	-1.29682	-1.30977	-1.68659	-1.00776
comp2078_c0_seq1	comp2078_c0_seq1 len=506 path=[0:0-505] : tr|F2EI82|F2EI82_HORVD Predicted protein OS=Hordeum vulgare var. distichum PE=2 SV=1 e-value: 1e-25 blast score: 116	0.000201969	0.000178123	0.000242228	0.000249028	0.000178543	0.00022958	0.000347772	0.000270826	0.000174565	0.000252499	0.00016709	0.00022787	1.7219	1.52044	0.720664	1.01394	0.935854	0.992554	-0.580752	-0.657704	-1.38761	-0.986253	-1.06854	-1.0075
TC274772	TC274772 UniRef100_P41096 Cluster: Chloroplast 50S ribosomal protein L2; n=3; Pooideae|Rep: Chloroplast 50S ribosomal protein L2 - Hordeum vulgare (Barley), complete	1.65549e-06	1.52398e-06	3.78187e-07	4.48699e-07	2.28242e-07	1.42801e-06	1.875e-06	2.39357e-06	1.45298e-06	8.4327e-07	8.13749e-07	1.13735e-06	1.1326	1.5706	3.84197	1.87937	3.56529	0.796455	-0.882926	-0.636698	-0.260283	-0.532095	-0.280482	-1.25556
comp8390_c0_seq1	comp8390_c0_seq1 len=216 path=[0:0-215] : tr|F2CZ54|F2CZ54_HORVD Predicted protein OS=Hordeum vulgare var. distichum PE=2 SV=1 e-value: 1e-13 blast score: 76.3	7.09494e-07	6.09593e-07	7.56373e-07	5.04787e-07	3.99424e-07	3.84464e-07	5.70652e-07	7.03992e-07	3.11353e-07	6.02335e-07	2.7125e-07	6.02124e-07	0.804309	1.15485	0.41164	1.19325	0.679102	1.56614	-1.2433	-0.86591	-2.42931	-0.838049	-1.47253	-0.638513
TC392695	TC392695 similar to UniRef100_Q2QMU6 Cluster: Kinesin motor domain containing protein, expressed; n=1; Oryza sativa Japonica Group|Rep: Kinesin motor domain containing protein, expressed - Oryza sativa subsp. japonica (Rice), partial (7%)	7.88327e-08	1.82878e-07	0	5.60874e-08	1.14121e-07	1.6477e-07	1.63043e-07	1.40798e-07	2.07569e-07	2.40934e-07	2.03437e-07	2.00708e-07	2.06822	0.769903	0	4.29569	1.78264	1.21811	-0.483507	-1.29886	0	-0.232791	-0.560965	-0.820945
comp36982_c0_seq1	comp36982_c0_seq1 len=303 path=[0:0-302]	1.57665e-07	2.43837e-07	1.89093e-07	1.12175e-07	3.42364e-07	1.09847e-07	4.8913e-07	1.40798e-07	6.22707e-07	1.20467e-07	3.39062e-07	2.67611e-07	3.10233	0.577427	3.29312	1.07392	0.990357	2.43622	-0.322338	-1.73182	-0.303663	-0.931165	-1.00974	-0.410473
comp3356_c0_seq1	comp3356_c0_seq1 len=178 path=[0:0-177]	7.09494e-07	1.34111e-06	1.89093e-07	1.00957e-06	7.41788e-07	1.15339e-06	6.52174e-07	9.15189e-07	1.55677e-06	6.02335e-07	2.17e-06	1.33805e-06	0.91921	0.682414	8.2328	0.596624	2.92536	1.1601	-1.08789	-1.46539	-0.121465	-1.6761	-0.341838	-0.861992
comp10740_c0_seq1	comp10740_c0_seq1 len=372 path=[0:0-97 350:98-371]	4.17813e-06	6.27881e-06	9.07648e-06	8.69355e-06	8.67321e-06	6.53589e-06	6.11413e-06	5.42073e-06	6.59031e-06	5.66195e-06	6.51e-06	7.22549e-06	1.46337	0.863338	0.726087	0.651282	0.750586	1.10551	-0.683356	-1.1583	-1.37725	-1.53543	-1.33229	-0.90456
comp19923_c0_seq1	comp19923_c0_seq1 len=234 path=[0:0-233] : tr|F2DBC3|F2DBC3_HORVD Predicted protein OS=Hordeum vulgare var. distichum PE=2 SV=1 e-value: 5e-21 blast score: 100	2.36498e-07	3.04797e-07	3.78187e-07	1.68262e-07	2.28242e-07	1.6477e-07	8.15217e-08	7.03992e-08	4.15138e-07	1.20467e-07	6.78124e-08	4.68319e-07	0.344704	0.230971	1.09771	0.715949	0.297107	2.84225	-2.90104	-4.32955	-0.91099	-1.39675	-3.36579	-0.351834
TC370612	TC370612 similar to UniRef100_O22385 Cluster: Glycine-rich protein; n=1; Oryza sativa|Rep: Glycine-rich protein - Oryza sativa (Rice), partial (65%) #or# TC424581 weakly similar to UniRef100_Q40052 Cluster: Glycine rich protein, RNA binding protein; n=1; Hordeum vulgare|Rep: Glycine rich protein, RNA binding protein - Hordeum vulgare (Barley), partial (65%) #or# TC426369 similar to UniRef100_O241…	7.17377e-06	6.58361e-06	6.99645e-06	7.45962e-06	7.07552e-06	6.92035e-06	1.38587e-05	1.19679e-05	5.24111e-06	6.98709e-06	4.47562e-06	7.76071e-06	1.93186	1.81783	0.74911	0.936655	0.632551	1.12143	-0.517637	-0.550108	-1.33492	-1.06763	-1.5809	-0.891716
comp47090_c0_seq1	comp47090_c0_seq1 len=239 path=[0:0-238] : tr|B9HEB2|B9HEB2_POPTR Predicted protein OS=Populus trichocarpa GN=POPTRDRAFT_819740 PE=4 SV=1 e-value: 3e-04 blast score: 45.1	1.57665e-07	1.21919e-07	0	0	0	0	2.44565e-07	0	0	0	0	0	1.55117	0	0	0	0	0	-0.644676	0	0	0	0	0
comp7571_c0_seq1	comp7571_c0_seq1 len=239 path=[0:0-238]	8.90809e-06	8.10759e-06	1.66402e-05	2.17058e-05	1.70041e-05	1.39505e-05	1.65489e-05	1.3587e-05	1.43223e-05	1.31309e-05	9.08687e-06	1.45848e-05	1.85774	1.67584	0.860702	0.604949	0.534394	1.04546	-0.538289	-0.596715	-1.16184	-1.65303	-1.87128	-0.956514
comp15380_c0_seq1	comp15380_c0_seq1 len=412 path=[0:0-411]	1.65549e-06	2.62125e-06	1.70184e-06	2.35567e-06	2.56773e-06	2.96586e-06	1.30435e-06	2.95676e-06	3.3211e-06	2.28887e-06	3.7975e-06	4.08106e-06	0.787894	1.128	1.95148	0.971645	1.47893	1.37601	-1.26921	-0.886527	-0.512432	-1.02918	-0.676163	-0.726738
comp5279_c0_seq1	comp5279_c0_seq1 len=657 path=[0:0-656] : tr|F2DEW5|F2DEW5_HORVD Predicted protein OS=Hordeum vulgare var. distichum PE=2 SV=1 e-value: 3e-19 blast score: 96.3	8.75043e-06	9.99733e-06	1.70184e-05	2.45663e-05	1.95718e-05	1.7246e-05	1.72826e-05	1.36574e-05	1.30249e-05	1.52993e-05	9.56156e-06	1.98701e-05	1.97506	1.36611	0.765345	0.622777	0.488538	1.15216	-0.506314	-0.732006	-1.3066	-1.60571	-2.04693	-0.867935
comp48087_c0_seq1	comp48087_c0_seq1 len=106 path=[0:0-105] : tr|A0FIJ6|A0FIJ6_CITSI Stress-related protein OS=Citrus sinensis GN=PR PE=2 SV=1 e-value: 2e-12 blast score: 72.0	0	6.09593e-08	0	0	0	0	8.15217e-08	7.03992e-08	0	0	0	0	0	1.15485	0	0	0	0	0	-0.86591	0	0	0	0
comp40465_c0_seq1	comp40465_c0_seq1 len=181 path=[0:0-180] : tr|A5HLW8|A5HLW8_CITSI Putative R2R3-Myb transcription factor OS=Citrus sinensis GN=Myb8 PE=4 SV=1 e-value: 6e-30 blast score: 130	7.88327e-08	1.21919e-07	0	0	0	0	1.63043e-07	7.03992e-08	0	0	0	0	2.06822	0.577427	0	0	0	0	-0.483507	-1.73182	0	0	0	0
comp33520_c0_seq1	comp33520_c0_seq1 len=193 path=[0:0-192]	7.88327e-08	2.43837e-07	0	0	0	0	3.26087e-07	2.11197e-07	0	0	0	0	4.13645	0.866141	0	0	0	0	-0.241753	-1.15455	0	0	0	0
comp5246_c0_seq1	comp5246_c0_seq1 len=496 path=[0:0-495] : tr|B9N841|B9N841_POPTR Predicted protein OS=Populus trichocarpa GN=POPTRDRAFT_584574 PE=4 SV=1 e-value: 4e-24 blast score: 111	5.59712e-06	7.31512e-06	0	0	0	0	9.70109e-06	7.67351e-06	5.18922e-08	2.40934e-07	6.78124e-08	6.69027e-08	1.73323	1.04899	0	0	0	0	-0.576958	-0.953295	0	0	0	0
comp39267_c0_seq1	comp39267_c0_seq1 len=262 path=[0:0-261]	2.36498e-07	1.82878e-07	0	1.12175e-07	1.14121e-07	5.49234e-08	0	0	2.07569e-07	0	0	6.69027e-08	0	0	0	0	0	1.21811	0	0	0	0	0	-0.820945
comp25858_c0_seq1	comp25858_c0_seq1 len=267 path=[0:0-266]	4.72996e-07	2.43837e-07	3.78187e-07	2.80437e-07	2.28242e-07	6.04157e-07	4.8913e-07	3.51996e-07	2.59461e-07	4.81868e-07	1.35625e-07	6.02124e-07	1.03411	1.44357	0.686067	1.71828	0.594214	0.996634	-0.967014	-0.692728	-1.45758	-0.581978	-1.68289	-1.00338
comp1965_c0_seq1	comp1965_c0_seq1 len=548 path=[0:0-547] : tr|A0MA43|A0MA43_WHEAT Ran-binding protein OS=Triticum aestivum PE=2 SV=1 e-value: 5e-33 blast score: 141	3.05082e-05	3.39543e-05	3.12004e-05	4.13364e-05	3.49782e-05	4.88818e-05	3.96196e-05	3.7382e-05	3.79332e-05	3.68629e-05	3.84497e-05	4.00747e-05	1.29865	1.10095	1.21579	0.891779	1.09925	0.819828	-0.77003	-0.908309	-0.822508	-1.12135	-0.909713	-1.21977
TC449398	TC449398 similar to UniRef100_P24096 Cluster: Thymidine kinase; n=1; Bovine herpesvirus type 1 (strain 6660)|Rep: Thymidine kinase - Bovine herpesvirus 1 (strain 6660) (BoHV-1) (Infectious bovinerhinotracheitis virus), partial (6%)	1.57665e-07	1.21919e-07	3.78187e-07	1.12175e-07	2.85303e-07	2.19694e-07	2.28261e-06	1.97118e-06	1.3492e-06	1.68654e-06	8.13749e-07	1.33805e-06	14.4776	16.168	3.56755	15.0349	2.85223	6.09054	-0.0690724	-0.0618507	-0.280305	-0.0665118	-0.350603	-0.164189
comp3830_c0_seq1	comp3830_c0_seq1 len=623 path=[0:0-622] : tr|F2CVD2|F2CVD2_HORVD Predicted protein OS=Hordeum vulgare var. distichum PE=2 SV=1 e-value: 2e-15 blast score: 83.6	3.07447e-05	3.06016e-05	3.93314e-05	4.74499e-05	4.44502e-05	3.27344e-05	3.5788e-05	3.22428e-05	4.07873e-05	3.46945e-05	3.20075e-05	4.04761e-05	1.16404	1.05363	1.03702	0.731182	0.720075	1.2365	-0.859078	-0.949098	-0.964305	-1.36765	-1.38874	-0.808733
comp17048_c0_seq1	comp17048_c0_seq1 len=408 path=[0:0-407]	1.26132e-06	1.15823e-06	7.75282e-06	4.82352e-06	4.45073e-06	2.47155e-06	1.38587e-06	1.68958e-06	2.38704e-06	3.01168e-06	2.30562e-06	1.73947e-06	1.09874	1.45876	0.307893	0.624374	0.518033	0.703796	-0.910131	-0.685512	-3.24788	-1.6016	-1.93038	-1.42087
TC426120	TC426120 similar to UniRef100_Q0D5K1 Cluster: Os07g0555200 protein; n=2; Oryza sativa Japonica Group|Rep: Os07g0555200 protein - Oryza sativa subsp. japonica (Rice), partial (44%)	3.15331e-07	2.43837e-07	5.6728e-07	6.16961e-07	4.56485e-07	4.94311e-07	7.33696e-07	2.11197e-07	4.15138e-07	1.20467e-07	6.10312e-07	2.00708e-07	2.32675	0.866141	0.731804	0.195259	1.33698	0.406036	-0.429784	-1.15455	-1.36649	-5.12141	-0.747953	-2.46284
TC242154	TC242154 similar to UniRef100_A7QMG9 Cluster: Chromosome chr19 scaffold_126, whole genome shotgun sequence; n=1; Vitis vinifera|Rep: Chromosome chr19 scaffold_126, whole genome shotgun sequence - Vitis vinifera (Grape), complete	3.46864e-06	2.74317e-06	3.40368e-06	4.09438e-06	4.16542e-06	2.96586e-06	3.17935e-06	3.16796e-06	3.68435e-06	5.90289e-06	1.96656e-06	3.61274e-06	0.916599	1.15485	1.08246	1.4417	0.472115	1.21811	-1.09099	-0.86591	-0.923821	-0.693623	-2.11813	-0.820945
CN188647	CN188647 similar to UniRef100_A7Q966 Cluster: Chromosome chr19 scaffold_66, whole genome shotgun sequence; n=1; Vitis vinifera|Rep: Chromosome chr19 scaffold_66, whole genome shotgun sequence - Vitis vinifera (Grape), partial (35%)	7.88327e-08	0	0	0	0	0	8.15217e-08	1.40798e-07	0	0	0	0	1.03411	0	0	0	0	0	-0.967014	0	0	0	0	0
comp23257_c0_seq1	comp23257_c0_seq1 len=474 path=[0:0-473]	8.67159e-07	1.09727e-06	1.13456e-06	1.73871e-06	6.84727e-07	1.53786e-06	1.63043e-06	1.33758e-06	1.14163e-06	8.4327e-07	1.28844e-06	1.33805e-06	1.8802	1.21901	1.00623	0.484998	1.88168	0.870077	-0.531858	-0.820336	-0.993808	-2.06187	-0.53144	-1.14932
comp4450_c0_seq1	comp4450_c0_seq1 len=425 path=[0:0-270 288:271-424]	0.000102325	9.04636e-05	0.000243552	0.000211674	0.000231381	0.000124292	0.000108179	0.000107218	0.000159309	0.000156005	0.000130336	0.000163042	1.05722	1.1852	0.654107	0.737006	0.563295	1.31177	-0.945881	-0.843736	-1.5288	-1.35684	-1.77527	-0.76233
TC11416	TC11416 similar to UniRef100_Q38JG6 Cluster: NADH-ubiquinone oxidoreductase subunit-like; n=1; Solanum tuberosum|Rep: NADH-ubiquinone oxidoreductase subunit-like - Solanum tuberosum (Potato), partial (62%)	0	6.09593e-08	0	0	0	0	8.15217e-08	3.51996e-07	0	0	0	0	0	5.77427	0	0	0	0	0	-0.173182	0	0	0	0
comp5727_c0_seq1	comp5727_c0_seq1 len=551 path=[0:0-550] : tr|F2CR95|F2CR95_HORVD Predicted protein OS=Hordeum vulgare var. distichum PE=2 SV=1 e-value: 4e-20 blast score: 98.6	8.27743e-06	7.92471e-06	1.13456e-05	1.51436e-05	1.44363e-05	1.06551e-05	9.86413e-06	9.92628e-06	1.18314e-05	9.1555e-06	1.05787e-05	1.13735e-05	1.19169	1.25257	1.04282	0.604579	0.732786	1.06741	-0.839144	-0.798357	-0.958937	-1.65404	-1.36466	-0.936843
comp6965_c0_seq1	comp6965_c0_seq1 len=391 path=[0:0-253 254:254-390]	6.70078e-06	7.01032e-06	1.24802e-05	1.04883e-05	9.07264e-06	7.30481e-06	1.00272e-05	8.5887e-06	9.13303e-06	7.70989e-06	6.44218e-06	8.36283e-06	1.49642	1.22515	0.731804	0.735092	0.710067	1.14484	-0.668262	-0.816227	-1.36649	-1.36037	-1.40832	-0.873486
comp15330_c0_seq1	comp15330_c0_seq1 len=183 path=[0:0-182]	1.10366e-06	6.09593e-07	0	2.80437e-07	3.42364e-07	4.94311e-07	5.70652e-07	7.03992e-08	5.18922e-08	0	1.35625e-07	0	0.517056	0.115485	0	0	0.396143	0	-1.93403	-8.6591	0	0	-2.52434	0
comp26259_c0_seq1	comp26259_c0_seq1 len=260 path=[20:0-259]	5.51829e-07	1.82878e-07	0	0	0	0	2.44565e-07	3.51996e-07	0	0	0	0	0.443191	1.92476	0	0	0	0	-2.25637	-0.519546	0	0	0	0
comp5599_c0_seq1	comp5599_c0_seq1 len=648 path=[0:0-647]	7.64677e-06	7.37608e-06	1.66402e-05	1.6714e-05	1.21539e-05	1.02158e-05	9.70109e-06	1.20383e-05	1.35439e-05	1.30104e-05	9.69718e-06	1.25108e-05	1.26865	1.63207	0.813924	0.778414	0.797865	1.22466	-0.788238	-0.61272	-1.22862	-1.28466	-1.25334	-0.816555
comp1097_c0_seq1	comp1097_c0_seq1 len=229 path=[0:0-228]	2.63301e-05	3.01749e-05	5.71062e-05	5.03104e-05	4.90721e-05	4.28403e-05	4.77717e-05	4.53371e-05	4.88306e-05	5.43307e-05	3.75681e-05	4.30184e-05	1.81434	1.50248	0.855084	1.07991	0.765569	1.00416	-0.551165	-0.665567	-1.16948	-0.926004	-1.30622	-0.995859
comp4368_c0_seq1	comp4368_c0_seq1 len=475 path=[0:0-474] : tr|A3AFU9|A3AFU9_ORYSJ Putative uncharacterized protein OS=Oryza sativa subsp. japonica GN=OsJ_10057 PE=4 SV=1 e-value: 3e-12 blast score: 71.6	1.06424e-05	9.1439e-06	1.38038e-05	2.04158e-05	2.05418e-05	1.53236e-05	1.46739e-05	1.17567e-05	2.07569e-05	1.51789e-05	1.39016e-05	1.93349e-05	1.37882	1.28574	1.50371	0.743485	0.676744	1.26177	-0.72526	-0.777763	-0.665023	-1.34502	-1.47766	-0.792539
comp2192_c0_seq1	comp2192_c0_seq1 len=467 path=[0:0-466] : tr|F2D9N7|F2D9N7_HORVD Predicted protein OS=Hordeum vulgare var. distichum PE=2 SV=1 e-value: 3e-11 blast score: 68.6	2.57783e-05	2.68221e-05	3.53604e-05	5.40122e-05	3.09268e-05	3.02628e-05	6.22826e-05	5.29402e-05	4.83635e-05	4.26454e-05	2.46159e-05	4.17473e-05	2.41609	1.97375	1.36773	0.789551	0.79594	1.37949	-0.413892	-0.506649	-0.731138	-1.26654	-1.25638	-0.724905
comp47519_c0_seq1	comp47519_c0_seq1 len=111 path=[0:0-110] : tr|B9FWW9|B9FWW9_ORYSJ Putative uncharacterized protein OS=Oryza sativa subsp. japonica GN=OsJ_24005 PE=4 SV=1 e-value: 4e-05 blast score: 47.8	0	1.82878e-07	0	1.68262e-07	5.70606e-08	1.6477e-07	8.15217e-08	7.03992e-08	2.59461e-07	0	0	6.69027e-08	0	0.384951	0	0	0	0.406036	0	-2.59773	0	0	0	-2.46284
comp4272_c0_seq1	comp4272_c0_seq1 len=595 path=[0:0-594] : tr|Q7Y070|Q7Y070_WHEAT Vacuolar proton-inorganic pyrophosphatase OS=Triticum aestivum PE=2 SV=1 e-value: 7e-04 blast score: 44.7	0.00011888	0.000127771	0.000142954	0.000169608	0.000136717	0.000154115	0.000220027	0.000191486	0.000127084	0.000111432	0.000117044	0.000119488	1.85084	1.49867	0.888982	0.656997	0.856105	0.775318	-0.540295	-0.66726	-1.12488	-1.52208	-1.16808	-1.28979
TC430824	TC430824 similar to UniRef100_Q5VPG9 Cluster: DNA-binding bromodomain-containing protein-like; n=4; Oryza sativa|Rep: DNA-binding bromodomain-containing protein-like - Oryza sativa subsp. japonica (Rice), partial (26%)	7.88327e-08	0	0	0	5.70606e-08	0	0	0	0	0	6.78124e-08	0	0	0	0	0	1.18843	0	0	0	0	0	-0.841447	0
CD870828	CD870828 weakly similar to UniRef100_A5NX13 Cluster: LigA; n=1; Methylobacterium sp. 4-46|Rep: LigA - Methylobacterium sp. 4-46, partial (3%)	7.88327e-08	1.21919e-07	1.89093e-07	1.12175e-07	3.42364e-07	2.19694e-07	2.44565e-07	1.40798e-07	1.55677e-07	3.61401e-07	2.7125e-07	5.35221e-07	3.10233	1.15485	0.82328	3.22177	0.792286	2.43622	-0.322338	-0.86591	-1.21465	-0.310388	-1.26217	-0.410473
comp28736_c0_seq1	comp28736_c0_seq1 len=157 path=[0:0-156] : tr|F2DSK6|F2DSK6_HORVD Predicted protein OS=Hordeum vulgare var. distichum PE=4 SV=1 e-value: 3e-08 blast score: 58.2	2.04965e-06	1.70686e-06	2.64731e-06	2.69219e-06	2.39655e-06	2.52648e-06	4.32065e-06	3.51996e-06	1.66055e-06	1.92747e-06	1.49187e-06	2.07398e-06	2.108	2.06224	0.627261	0.715949	0.62251	0.820899	-0.474384	-0.48491	-1.59423	-1.39675	-1.6064	-1.21818
comp12423_c0_seq1	comp12423_c0_seq1 len=449 path=[0:0-448]	7.33144e-06	8.22951e-06	4.34914e-06	5.49656e-06	6.27667e-06	7.14004e-06	8.47826e-06	6.12473e-06	7.52437e-06	6.74616e-06	7.05249e-06	6.35575e-06	1.15643	0.74424	1.73008	1.22734	1.12361	0.890156	-0.864734	-1.34365	-0.578008	-0.81477	-0.889992	-1.1234
comp48133_c0_seq1	comp48133_c0_seq1 len=103 path=[0:0-102] : tr|B5KVP8|B5KVP8_TRITU Pseudo-response regulator OS=Triticum turgidum GN=PRR PE=4 SV=1 e-value: 6e-12 blast score: 70.5	7.88327e-08	0	0	5.60874e-08	0	5.49234e-08	8.15217e-08	0	0	0	0	0	1.03411	0	0	0	0	0	-0.967014	0	0	0	0	0
comp13521_c0_seq1	comp13521_c0_seq1 len=152 path=[0:0-151]	8.67159e-07	9.75349e-07	1.89093e-06	2.97263e-06	2.28242e-06	2.52648e-06	8.96739e-07	1.47838e-06	1.45298e-06	1.44561e-06	1.085e-06	2.27469e-06	1.03411	1.51575	0.768394	0.486305	0.475371	0.900341	-0.967014	-0.659741	-1.30141	-2.05632	-2.10362	-1.11069
BJ276955	BJ276955 homologue to UniRef100_Q0E0G7 Cluster: Os02g0552600 protein; n=1; Oryza sativa Japonica Group|Rep: Os02g0552600 protein - Oryza sativa subsp. japonica (Rice), partial (4%)	7.09494e-07	3.04797e-07	9.45466e-07	6.16961e-07	4.56485e-07	7.68928e-07	4.07609e-07	3.51996e-07	6.74599e-07	8.4327e-07	7.45937e-07	1.07044e-06	0.574506	1.15485	0.713509	1.36681	1.63409	1.39212	-1.74063	-0.86591	-1.40152	-0.73163	-0.611962	-0.718327
comp15361_c0_seq1	comp15361_c0_seq1 len=318 path=[0:0-317]	1.49782e-06	1.58494e-06	0	0	0	0	1.79348e-06	2.04158e-06	0	0	0	0	1.19739	1.28811	0	0	0	0	-0.835148	-0.776333	0	0	0	0
comp23158_c0_seq1	comp23158_c0_seq1 len=201 path=[0:0-200]	2.36498e-07	4.87675e-07	7.56373e-07	1.85088e-06	1.65476e-06	4.94311e-07	6.52174e-07	7.03992e-07	5.70814e-07	7.22803e-07	6.78124e-07	6.69027e-07	2.75763	1.44357	0.754673	0.390517	0.409803	1.35345	-0.36263	-0.692728	-1.32508	-2.5607	-2.4402	-0.738851
comp15467_c0_seq1	comp15467_c0_seq1 len=248 path=[0:0-247]	2.36498e-06	2.19454e-06	2.45821e-06	2.46785e-06	1.883e-06	2.5814e-06	1.79348e-06	2.74557e-06	1.40109e-06	1.92747e-06	1.6275e-06	2.74301e-06	0.758348	1.25109	0.569963	0.781035	0.864312	1.0626	-1.31866	-0.799301	-1.7545	-1.28035	-1.15699	-0.941084
CA695141	CA695141 homologue to UniRef100_A7QDC0 Cluster: Chromosome undetermined scaffold_80, whole genome shotgun sequence; n=1; Vitis vinifera|Rep: Chromosome undetermined scaffold_80, whole genome shotgun sequence - Vitis vinifera (Grape), partial (35%)	6.30661e-07	7.92471e-07	1.89093e-07	3.92612e-07	4.56485e-07	1.26324e-06	7.33696e-07	4.92794e-07	3.11353e-07	3.61401e-07	5.425e-07	6.02124e-07	1.16338	0.621845	1.64656	0.920505	1.18843	0.476651	-0.859568	-1.60812	-0.607327	-1.08636	-0.841447	-2.09797
TC440657	TC440657 similar to UniRef100_A7QS73 Cluster: Chromosome chr5 scaffold_156, whole genome shotgun sequence; n=1; Vitis vinifera|Rep: Chromosome chr5 scaffold_156, whole genome shotgun sequence - Vitis vinifera (Grape), partial (20%)	7.88327e-07	9.1439e-07	9.45466e-07	1.06566e-06	6.84727e-07	5.49234e-07	8.15217e-07	9.15189e-07	4.15138e-07	6.02335e-07	3.39062e-07	1.07044e-06	1.03411	1.00087	0.439083	0.565223	0.495179	1.94897	-0.967014	-0.999127	-2.27748	-1.76921	-2.01947	-0.513091
comp16652_c0_seq1	comp16652_c0_seq1 len=292 path=[0:0-138 139:139-147 148:148-291]	7.2526e-06	5.73018e-06	1.73966e-05	1.87893e-05	2.19113e-05	9.55667e-06	7.98913e-06	6.89912e-06	7.05734e-06	1.74677e-05	8.00187e-06	1.34474e-05	1.10155	1.204	0.405674	0.929665	0.365194	1.40712	-0.907809	-0.830567	-2.46503	-1.07566	-2.73827	-0.710669
BI953304	BI953304 similar to UniRef100_Q84PA4 Cluster: H+-transporting ATP synthase chain 9-like protein; n=1; Oryza sativa Japonica Group|Rep: H+-transporting ATP synthase chain 9-like protein - Oryza sativa subsp. japonica (Rice), partial (51%)	0	1.21919e-07	0	1.68262e-07	2.85303e-07	2.19694e-07	8.15217e-08	1.40798e-07	3.63246e-07	1.20467e-07	2.7125e-07	6.69027e-08	0	1.15485	0	0.715949	0.950743	0.304527	0	-0.86591	0	-1.39675	-1.05181	-3.28378
comp1611_c0_seq1	comp1611_c0_seq1 len=403 path=[0:0-402]	3.88645e-05	3.48687e-05	2.17457e-05	2.39493e-05	2.91009e-05	3.92702e-05	2.09511e-05	2.54845e-05	3.96975e-05	3.38513e-05	4.08231e-05	2.87681e-05	0.53908	0.730869	1.82553	1.41345	1.40281	0.732569	-1.85501	-1.36823	-0.547785	-0.707487	-0.712854	-1.36506
comp10340_c0_seq1	comp10340_c0_seq1 len=342 path=[0:0-341] : tr|F2EEM4|F2EEM4_HORVD Predicted protein OS=Hordeum vulgare var. distichum PE=2 SV=1 e-value: 5e-08 blast score: 57.4	4.96646e-06	4.93771e-06	4.53824e-06	7.62789e-06	5.42076e-06	4.83326e-06	7.5e-06	5.70233e-06	5.3449e-06	4.93915e-06	5.28937e-06	7.09168e-06	1.51013	1.15485	1.17775	0.647512	0.975762	1.46727	-0.662194	-0.86591	-0.849078	-1.54437	-1.02484	-0.681539
comp15747_c0_seq1	comp15747_c0_seq1 len=248 path=[0:0-247]	3.3898e-06	4.20619e-06	4.34914e-06	2.35567e-06	2.96715e-06	3.67987e-06	2.44565e-06	3.37916e-06	3.52867e-06	3.13214e-06	3.59406e-06	2.4754e-06	0.721473	0.803377	0.811348	1.32962	1.21128	0.672687	-1.38605	-1.24475	-1.23252	-0.752095	-0.825571	-1.48658
comp2452_c0_seq1	comp2452_c0_seq1 len=334 path=[0:0-333] : tr|F2EK12|F2EK12_HORVD Predicted protein OS=Hordeum vulgare var. distichum PE=2 SV=1 e-value: 7e-04 blast score: 43.5	2.94046e-05	2.4018e-05	2.64731e-05	3.33159e-05	3.18969e-05	2.71871e-05	3.11413e-05	1.89374e-05	2.13277e-05	2.24069e-05	1.94622e-05	1.85989e-05	1.05906	0.788467	0.805638	0.672558	0.610159	0.684109	-0.944231	-1.26828	-1.24125	-1.48686	-1.63892	-1.46175
comp6986_c0_seq1	comp6986_c0_seq1 len=330 path=[0:0-329]	7.80443e-06	6.03497e-06	1.70184e-05	1.33488e-05	1.10698e-05	8.62298e-06	1.32065e-05	1.14751e-05	6.07139e-06	1.49379e-05	7.39156e-06	1.1708e-05	1.69218	1.90143	0.356755	1.11905	0.667725	1.35776	-0.590953	-0.525921	-2.80305	-0.893618	-1.49762	-0.736505
comp43571_c0_seq1	comp43571_c0_seq1 len=173 path=[0:0-172]	2.36498e-07	0	0	0	0	0	1.63043e-07	1.40798e-07	0	0	0	0	0.689408	0	0	0	0	0	-1.45052	0	0	0	0	0
comp9926_c0_seq1	comp9926_c0_seq1 len=316 path=[0:0-315]	4.91127e-05	4.73044e-05	0.000179071	0.00023467	0.000135975	8.37582e-05	0.000205761	0.000171281	0.000108455	0.000121913	4.774e-05	8.84453e-05	4.18956	3.62083	0.605651	0.519508	0.351093	1.05596	-0.238688	-0.27618	-1.65112	-1.9249	-2.84825	-0.947006
comp32801_c0_seq1	comp32801_c0_seq1 len=161 path=[0:0-160] : tr|C5XHX6|C5XHX6_SORBI Putative uncharacterized protein Sb03g046020 OS=Sorghum bicolor GN=Sb03g046020 PE=4 SV=1 e-value: 1e-21 blast score: 102	1.57665e-07	1.21919e-07	0	2.80437e-07	3.99424e-07	1.6477e-07	8.15217e-08	0	5.18922e-08	0	0	0	0.517056	0	0	0	0	0	-1.93403	0	0	0	0	0
comp34450_c0_seq1	comp34450_c0_seq1 len=139 path=[0:0-138]	3.94163e-07	3.65756e-07	5.6728e-07	1.23392e-06	4.56485e-07	3.84464e-07	1.22283e-06	7.03992e-07	1.92001e-06	7.22803e-07	6.78124e-07	4.01416e-07	3.10233	1.92476	3.38459	0.585776	1.48554	1.04409	-0.322338	-0.519546	-0.295456	-1.70714	-0.673158	-0.957769
comp12250_c0_seq1	comp12250_c0_seq1 len=483 path=[0:0-304 305:305-482] : tr|F2EHK5|F2EHK5_HORVD Predicted protein OS=Hordeum vulgare var. distichum PE=2 SV=1 e-value: 2e-13 blast score: 75.5	2.68031e-06	3.16989e-06	1.51275e-06	2.18741e-06	1.65476e-06	2.14201e-06	2.36413e-06	1.83038e-06	5.3449e-06	1.92747e-06	4.47562e-06	3.74655e-06	0.882036	0.577427	3.53324	0.881168	2.7047	1.74908	-1.13374	-1.73182	-0.283026	-1.13486	-0.369727	-0.57173
comp30706_c0_seq1	comp30706_c0_seq1 len=266 path=[0:0-265]	3.15331e-07	3.04797e-07	7.56373e-07	6.73049e-07	5.70606e-07	3.84464e-07	8.15217e-07	4.92794e-07	3.63246e-07	6.02335e-07	4.06875e-07	8.02832e-07	2.58528	1.6168	0.480247	0.894936	0.713057	2.08819	-0.386806	-0.618507	-2.08226	-1.1174	-1.40241	-0.478885
comp39593_c0_seq1	comp39593_c0_seq1 len=163 path=[0:0-162]	7.88327e-08	1.21919e-07	0	0	0	0	0	7.03992e-08	0	0	0	0	0	0.577427	0	0	0	0	0	-1.73182	0	0	0	0
comp9017_c0_seq1	comp9017_c0_seq1 len=343 path=[0:0-294 311:295-342] : tr|F2DSD1|F2DSD1_HORVD Predicted protein OS=Hordeum vulgare var. distichum PE=4 SV=1 e-value: 2e-05 blast score: 48.5	3.23214e-06	3.2918e-06	9.45466e-07	1.62653e-06	2.1683e-06	3.46017e-06	1.95652e-06	1.75998e-06	4.56652e-06	3.25261e-06	5.28937e-06	4.01416e-06	0.605333	0.534655	4.82991	1.99972	2.43941	1.1601	-1.65198	-1.87037	-0.207043	-0.50007	-0.409936	-0.861992
comp21895_c0_seq1	comp21895_c0_seq1 len=231 path=[0:0-230]	4.72996e-07	6.09593e-07	1.89093e-07	2.2435e-07	1.14121e-07	2.74617e-07	8.15217e-08	0	0	0	0	0	0.172352	0	0	0	0	0	-5.80208	0	0	0	0	0
comp11032_c0_seq1	comp11032_c0_seq1 len=420 path=[0:0-48 49:49-51 52:52-419] : tr|F2E5P8|F2E5P8_HORVD Predicted protein OS=Hordeum vulgare var. distichum PE=2 SV=1 e-value: 1e-07 blast score: 56.2	9.85408e-06	5.79114e-06	2.64731e-05	2.96702e-05	2.1626e-05	1.42252e-05	2.80435e-05	2.25277e-05	1.93558e-05	1.37332e-05	8.40874e-06	1.28453e-05	2.84587	3.89004	0.731151	0.462863	0.388826	0.902999	-0.351386	-0.257067	-1.36771	-2.16047	-2.57184	-1.10742
comp1085_c0_seq1	comp1085_c0_seq1 len=387 path=[0:0-386] : tr|F2DV15|F2DV15_HORVD Predicted protein (Fragment) OS=Hordeum vulgare var. distichum PE=2 SV=1 e-value: 6e-25 blast score: 113	4.34368e-05	4.37078e-05	4.19787e-05	5.08713e-05	4.62762e-05	5.33306e-05	6.5462e-05	5.32922e-05	5.98836e-05	4.48138e-05	4.43493e-05	4.77016e-05	1.50706	1.21928	1.42652	0.880925	0.958363	0.89445	-0.663543	-0.820155	-0.701005	-1.13517	-1.04345	-1.11801
TC391530	TC391530 UniRef100_Q9ZRS5 Cluster: Ribulose bisphosphate carboxylase small chain; n=1; Secale cereale|Rep: Ribulose bisphosphate carboxylase small chain - Secale cereale (Rye), complete #or# TC394649 UniRef100_Q9FRZ4 Cluster: Ribulose bisphosphate carboxylase small chain; n=1; Triticum aestivum|Rep: Ribulose bisphosphate carboxylase small chain - Triticum aestivum (Wheat), partial (77%)	0	3.65756e-07	1.89093e-07	1.68262e-07	5.70606e-08	1.09847e-07	8.15217e-08	1.40798e-07	4.15138e-07	7.22803e-07	5.425e-07	2.00708e-07	0	0.384951	2.19541	4.29569	9.50743	1.82716	0	-2.59773	-0.455495	-0.232791	-0.105181	-0.547297
BJ268015	BJ268015 homologue to UniRef100_Q0IKM2 Cluster: Ca2+ binding protein cbp1; n=1; Triticum aestivum|Rep: Ca2+ binding protein cbp1 - Triticum aestivum (Wheat), partial (26%)	1.57665e-07	1.21919e-07	0	5.04787e-07	5.13545e-07	5.49234e-07	3.26087e-07	1.40798e-07	4.15138e-07	6.02335e-07	4.74687e-07	3.34513e-07	2.06822	1.15485	0	1.19325	0.924333	0.609054	-0.483507	-0.86591	0	-0.838049	-1.08186	-1.64189
comp11752_c0_seq1	comp11752_c0_seq1 len=327 path=[0:0-326] : tr|O04428|O04428_CITPA Putative uncharacterized protein OS=Citrus paradisi PE=2 SV=1 e-value: 2e-04 blast score: 45.4	2.44381e-06	2.07262e-06	0	0	0	0	3.17935e-06	2.18237e-06	0	0	0	0	1.30098	1.05296	0	0	0	0	-0.768652	-0.949708	0	0	0	0
CA645714	CA645714	7.88327e-08	1.21919e-07	0	0	0	5.49234e-08	1.63043e-07	1.40798e-07	1.55677e-07	0	0	6.69027e-08	2.06822	1.15485	0	0	0	1.21811	-0.483507	-0.86591	0	0	0	-0.820945
comp43053_c0_seq1	comp43053_c0_seq1 len=217 path=[0:0-216]	7.88327e-08	1.21919e-07	0	0	0	0	0	1.40798e-07	0	0	6.78124e-08	0	0	1.15485	0	0	0	0	0	-0.86591	0	0	0	0
comp31152_c0_seq1	comp31152_c0_seq1 len=162 path=[0:0-161]	3.15331e-07	6.09593e-08	0	0	0	5.49234e-08	0	0	5.18922e-08	0	0	6.69027e-08	0	0	0	0	0	1.21811	0	0	0	0	0	-0.820945
comp7795_c0_seq1	comp7795_c0_seq1 len=329 path=[5:0-328]	4.57229e-05	4.16962e-05	6.95863e-05	8.50285e-05	6.56768e-05	6.7391e-05	6.77446e-05	6.42744e-05	7.23896e-05	7.07142e-05	5.56062e-05	6.81738e-05	1.48163	1.54149	1.04029	0.831653	0.846665	1.01162	-0.674931	-0.648721	-0.961274	-1.20242	-1.1811	-0.988518
TC13984	TC13984 similar to UniRef100_A7NUJ3 Cluster: Chromosome chr18 scaffold_1, whole genome shotgun sequence; n=1; Vitis vinifera|Rep: Chromosome chr18 scaffold_1, whole genome shotgun sequence - Vitis vinifera (Grape), partial (31%)	1.57665e-07	0	0	0	0	0	8.15217e-08	1.40798e-07	0	0	0	0	0.517056	0	0	0	0	0	-1.93403	0	0	0	0	0
comp34456_c0_seq1	comp34456_c0_seq1 len=291 path=[0:0-290]	2.36498e-07	3.04797e-07	0	0	0	0	5.70652e-07	7.74391e-07	0	0	0	0	2.41293	2.54068	0	0	0	0	-0.414435	-0.393595	0	0	0	0
comp18703_c0_seq1	comp18703_c0_seq1 len=560 path=[0:0-559]	1.34016e-06	2.07262e-06	1.70184e-06	1.62653e-06	2.68185e-06	1.53786e-06	1.875e-06	2.11197e-06	1.76434e-06	2.16841e-06	2.17e-06	2.80991e-06	1.39909	1.01899	1.03672	1.33315	0.809143	1.82716	-0.714749	-0.981365	-0.964578	-0.750105	-1.23588	-0.547297
comp10330_c0_seq1	comp10330_c0_seq1 len=345 path=[0:0-344]	2.75914e-06	3.77948e-06	3.40368e-06	5.55265e-06	5.76312e-06	3.57002e-06	3.0163e-06	2.74557e-06	1.81623e-06	1.68654e-06	1.89875e-06	2.20779e-06	1.0932	0.726441	0.533607	0.303736	0.329465	0.618424	-0.914743	-1.37657	-1.87404	-3.29233	-3.03522	-1.61701
TC391769	TC391769 weakly similar to UniRef100_A7PZ32 Cluster: Chromosome chr4 scaffold_39, whole genome shotgun sequence; n=1; Vitis vinifera|Rep: Chromosome chr4 scaffold_39, whole genome shotgun sequence - Vitis vinifera (Grape), partial (34%) #or# TC398750 #or# TC457023 similar to UniRef100_A6V991 Cluster: Two-component response regulator; n=1; Pseudomonas aeruginosa PA7|Rep: Two-component response reg…	7.88327e-08	1.21919e-07	0	5.60874e-08	0	0	8.15217e-08	0	5.18922e-08	0	0	6.69027e-08	1.03411	0	0	0	0	0	-0.967014	0	0	0	0	0
comp38936_c0_seq1	comp38936_c0_seq1 len=275 path=[0:0-274]	2.36498e-07	1.21919e-07	1.89093e-07	1.68262e-07	2.28242e-07	0	1.63043e-07	0	5.18922e-08	1.20467e-07	6.78124e-08	0	0.689408	0	0.274427	0.715949	0.297107	0	-1.45052	0	-3.64396	-1.39675	-3.36579	0
comp39215_c0_seq1	comp39215_c0_seq1 len=184 path=[0:0-183]	2.36498e-07	0	5.6728e-07	1.68262e-07	3.99424e-07	5.49234e-08	2.44565e-07	2.81597e-07	3.11353e-07	7.22803e-07	3.39062e-07	2.00708e-07	1.03411	0	0.548853	4.29569	0.848877	3.65432	-0.967014	0	-1.82198	-0.232791	-1.17803	-0.273648
comp23876_c0_seq1	comp23876_c0_seq1 len=188 path=[0:0-187]	3.15331e-07	4.26715e-07	0	4.48699e-07	3.42364e-07	6.04157e-07	5.70652e-07	4.22395e-07	3.11353e-07	3.61401e-07	2.7125e-07	5.35221e-07	1.80969	0.989875	0	0.805442	0.792286	0.885897	-0.552579	-1.01023	0	-1.24155	-1.26217	-1.1288
comp12723_c0_seq1	comp12723_c0_seq1 len=228 path=[0:0-227]	1.34016e-06	2.13358e-06	3.59277e-06	4.4309e-06	2.85303e-06	3.07571e-06	1.875e-06	3.02716e-06	3.00975e-06	3.85495e-06	1.96656e-06	2.4085e-06	1.39909	1.41882	0.837723	0.870014	0.689288	0.78307	-0.714749	-0.70481	-1.19371	-1.14941	-1.45077	-1.27703
comp6543_c0_seq1	comp6543_c0_seq1 len=367 path=[0:0-366]	1.00906e-05	1.01192e-05	1.38038e-05	1.27318e-05	1.28386e-05	1.20831e-05	1.4837e-05	1.11231e-05	1.53082e-05	1.19262e-05	1.12569e-05	1.27115e-05	1.47038	1.0992	1.10898	0.936726	0.876796	1.052	-0.680098	-0.909754	-0.901726	-1.06755	-1.14052	-0.950568
TC398363	TC398363 similar to UniRef100_A9RZ69 Cluster: Predicted protein; n=1; Physcomitrella patens subsp. patens|Rep: Predicted protein - Physcomitrella patens subsp. patens, partial (95%) #or# TC421229 similar to UniRef100_A9RZ69 Cluster: Predicted protein; n=1; Physcomitrella patens subsp. patens|Rep: Predicted protein - Physcomitrella patens subsp. patens, partial (86%)	1.57665e-07	0	0	0	5.70606e-08	2.19694e-07	8.15217e-08	0	2.07569e-07	1.20467e-07	2.03437e-07	1.33805e-07	0.517056	0	0	0	3.56529	0.609054	-1.93403	0	0	0	-0.280482	-1.64189
comp35966_c0_seq1	comp35966_c0_seq1 len=200 path=[0:0-199]	2.36498e-07	6.09593e-08	0	5.60874e-07	1.71182e-07	4.39387e-07	0	0	5.18922e-08	0	6.78124e-08	1.33805e-07	0	0	0	0	0.396143	0.304527	0	0	0	0	-2.52434	-3.28378
TC393033	TC393033	6.30661e-07	9.75349e-07	1.13456e-06	1.68262e-06	1.48358e-06	1.20831e-06	3.09783e-06	1.75998e-06	1.45298e-06	1.32514e-06	6.10312e-07	1.33805e-06	4.91203	1.80446	1.28066	0.787544	0.411379	1.10737	-0.203582	-0.554182	-0.780849	-1.26977	-2.43085	-0.90304
comp37408_c0_seq1	comp37408_c0_seq1 len=128 path=[0:0-127]	0	1.82878e-07	0	2.2435e-07	0	0	0	0	1.03784e-07	1.20467e-07	5.425e-07	2.00708e-07	0	0	0	0.536962	0	0	0	0	0	-1.86233	0	0
comp10455_c0_seq1	comp10455_c0_seq1 len=275 path=[0:0-274]	3.6263e-06	4.08428e-06	5.4837e-06	6.00135e-06	4.27955e-06	4.94311e-06	5.54348e-06	4.92794e-06	5.76004e-06	4.93915e-06	5.08593e-06	4.14796e-06	1.52869	1.20656	1.05039	0.823006	1.18843	0.839141	-0.654156	-0.8288	-0.952026	-1.21506	-0.841447	-1.19169
comp31464_c0_seq1	comp31464_c0_seq1 len=174 path=[0:0-173]	1.57665e-07	1.82878e-07	0	3.92612e-07	2.28242e-07	0	8.15217e-08	0	1.03784e-07	1.20467e-07	0	0	0.517056	0	0	0.306835	0	0	-1.93403	0	0	-3.25908	0	0
comp36261_c0_seq1	comp36261_c0_seq1 len=318 path=[0:0-317]	3.15331e-07	3.65756e-07	1.89093e-07	1.12175e-07	3.42364e-07	6.04157e-07	5.70652e-07	2.11197e-07	2.07569e-07	3.61401e-07	3.39062e-07	2.67611e-07	1.80969	0.577427	1.09771	3.22177	0.990357	0.442948	-0.552579	-1.73182	-0.91099	-0.310388	-1.00974	-2.2576
comp6674_c0_seq1	comp6674_c0_seq1 len=398 path=[0:0-397] : tr|F2DCR3|F2DCR3_HORVD Predicted protein OS=Hordeum vulgare var. distichum PE=2 SV=1 e-value: 1e-16 blast score: 86.3	2.89316e-05	3.54783e-05	4.48151e-05	5.61435e-05	5.16969e-05	3.0098e-05	3.53804e-05	3.99867e-05	5.71333e-05	4.16816e-05	4.11622e-05	4.18811e-05	1.2229	1.12707	1.27487	0.742412	0.796221	1.39149	-0.817728	-0.887253	-0.784395	-1.34696	-1.25593	-0.718655
comp3_c0_seq1	comp3_c0_seq1 len=693 path=[16:0-692] : tr|D6RSA1|D6RSA1_HORVU Light harvesting chlorophyll a/b-binding protein Lhcb1 OS=Hordeum vulgare GN=Lhcb1 PE=4 SV=1 e-value: 1e-46 blast score: 187	0.00633539	0.00568001	0.0126619	0.00795196	0.00842506	0.00634481	0.00764397	0.00761599	0.00568251	0.00892047	0.00524862	0.00573944	1.20655	1.34084	0.448789	1.1218	0.622977	0.904589	-0.828809	-0.7458	-2.22822	-0.891428	-1.6052	-1.10547
TC402206	TC402206 UniRef100_A6XMY6 Cluster: S-adenosylmethionine decarboxylase; n=1; Triticum monococcum|Rep: S-adenosylmethionine decarboxylase - Triticum monococcum (Einkorn wheat) (Small spelt), partial (31%)	0	1.82878e-07	1.89093e-07	5.60874e-08	1.14121e-07	0	0	0	0	0	2.03437e-07	1.33805e-07	0	0	0	0	1.78264	0	0	0	0	0	-0.560965	0
comp4320_c0_seq1	comp4320_c0_seq1 len=436 path=[0:0-435] : tr|F9G3X6|F9G3X6_FUSOF Putative uncharacterized protein OS=Fusarium oxysporum (strain Fo5176) GN=FOXB_13358 PE=4 SV=1 e-value: 3e-04 blast score: 37.0	7.88327e-06	8.65622e-06	7.75282e-06	9.70312e-06	8.61615e-06	6.97527e-06	8.07065e-06	7.74391e-06	6.33085e-06	6.50522e-06	7.32374e-06	7.22549e-06	1.02377	0.894606	0.816586	0.670426	0.850002	1.03587	-0.976782	-1.11781	-1.22461	-1.49159	-1.17647	-0.965371
comp11395_c0_seq1	comp11395_c0_seq1 len=491 path=[0:0-490]	4.72996e-06	4.45003e-06	3.78187e-06	4.31873e-06	4.62191e-06	4.11926e-06	3.83152e-06	3.44956e-06	4.72219e-06	4.21635e-06	4.67906e-06	4.75009e-06	0.810054	0.775176	1.24864	0.976294	1.01236	1.15314	-1.23449	-1.29003	-0.800871	-1.02428	-0.987786	-0.867196
TC397269	TC397269	2.36498e-06	2.19454e-06	1.70184e-06	2.74828e-06	3.08127e-06	2.74617e-06	3.0163e-06	2.60477e-06	3.84002e-06	2.40934e-06	2.30562e-06	3.14442e-06	1.2754	1.18693	2.2564	0.876672	0.74827	1.14502	-0.784065	-0.842507	-0.443185	-1.14068	-1.33642	-0.873346
comp9825_c0_seq1	comp9825_c0_seq1 len=318 path=[0:0-317]	2.99564e-06	3.10893e-06	7.75282e-06	1.04323e-05	1.20398e-05	5.65711e-06	9.375e-06	9.01109e-06	8.14708e-06	1.19262e-05	4.74687e-06	1.01692e-05	3.12955	2.89846	1.05085	1.14321	0.394265	1.7976	-0.319535	-0.345011	-0.951608	-0.874731	-2.53636	-0.556298
comp13114_c0_seq1	comp13114_c0_seq1 len=294 path=[0:0-293]	1.26132e-06	1.40206e-06	3.97096e-06	3.25307e-06	4.62191e-06	2.63632e-06	1.95652e-06	1.75998e-06	2.54272e-06	4.21635e-06	1.96656e-06	2.4085e-06	1.55117	1.25528	0.640329	1.29611	0.425487	0.913581	-0.644676	-0.796637	-1.5617	-0.771537	-2.35025	-1.09459
comp18872_c0_seq1	comp18872_c0_seq1 len=396 path=[0:0-395]	1.75009e-05	1.51179e-05	2.81749e-05	3.05115e-05	2.61338e-05	2.27383e-05	2.19293e-05	2.31613e-05	3.10834e-05	2.42139e-05	2.14287e-05	2.65604e-05	1.25304	1.53204	1.10323	0.793598	0.819964	1.16809	-0.798056	-0.652722	-0.906428	-1.26008	-1.21957	-0.856099
comp10291_c0_seq1	comp10291_c0_seq1 len=411 path=[0:0-410]	1.12731e-05	1.03021e-05	2.28803e-05	2.19302e-05	2.15689e-05	1.51589e-05	9.04891e-06	7.67351e-06	1.03784e-05	1.24081e-05	9.01906e-06	1.03699e-05	0.802702	0.744847	0.453598	0.565801	0.418151	0.684082	-1.24579	-1.34256	-2.2046	-1.76741	-2.39148	-1.46181
comp21943_c0_seq1	comp21943_c0_seq1 len=128 path=[0:0-127]	0	1.21919e-07	0	5.60874e-08	5.70606e-08	1.09847e-07	8.15217e-08	0	1.55677e-07	1.20467e-07	2.7125e-07	6.69027e-08	0	0	0	2.14785	4.75371	0.609054	0	0	0	-0.465583	-0.210362	-1.64189
CA702958	CA702958 homologue to UniRef100_Q9SXX6 Cluster: Nitrilase-like protein; n=1; Oryza sativa Japonica Group|Rep: Nitrilase-like protein - Oryza sativa subsp. japonica (Rice), partial (24%) #or# TC376806 homologue to UniRef100_Q9SXX6 Cluster: Nitrilase-like protein; n=1; Oryza sativa Japonica Group|Rep: Nitrilase-like protein - Oryza sativa subsp. japonica (Rice), complete #or# TC384732 homologue to …	4.72996e-07	1.21919e-07	5.6728e-07	1.7948e-06	9.1297e-07	8.23851e-07	1.79348e-06	1.40798e-06	1.3492e-06	3.13214e-06	6.78124e-07	1.87327e-06	3.79174	11.5485	2.37836	1.74512	0.742768	2.2738	-0.263731	-0.086591	-0.420457	-0.573025	-1.34632	-0.439792
TC377974	TC377974 similar to UniRef100_Q6YW53 Cluster: Integral membrane family protein-like; n=1; Oryza sativa Japonica Group|Rep: Integral membrane family protein-like - Oryza sativa subsp. japonica (Rice), partial (72%)	1.81315e-06	1.46302e-06	9.45466e-07	1.06566e-06	1.71182e-06	1.42801e-06	8.15217e-07	4.92794e-07	1.66055e-06	2.28887e-06	7.45937e-07	6.02124e-07	0.449614	0.336833	1.75633	2.14785	0.435757	0.421653	-2.22413	-2.96883	-0.569369	-0.465583	-2.29486	-2.37162
CA677102	CA677102 similar to UniRef100_A7Q5Y6 Cluster: Chromosome chr14 scaffold_54, whole genome shotgun sequence; n=1; Vitis vinifera|Rep: Chromosome chr14 scaffold_54, whole genome shotgun sequence - Vitis vinifera (Grape), partial (30%) #or# TC438706 homologue to UniRef100_Q6ZEZ5 Cluster: Serine/threonine-protein kinase Nek3; n=1; Oryza sativa Japonica Group|Rep: Serine/threonine-protein kinase Nek3 -…	4.18601e-05	4.62681e-05	2.09894e-05	2.28276e-05	2.39655e-05	3.20203e-05	2.51902e-05	3.33692e-05	3.25364e-05	2.90326e-05	3.65509e-05	3.15781e-05	0.601771	0.721213	1.55014	1.27182	1.52515	0.986187	-1.66176	-1.38655	-0.645103	-0.786275	-0.655673	-1.01401
comp11120_c0_seq1	comp11120_c0_seq1 len=620 path=[0:0-619] : tr|Q94JA3|Q94JA3_ORYSJ P0047B08.8 protein OS=Oryza sativa subsp. japonica GN=P0047B08.8 PE=4 SV=1 e-value: 5e-08 blast score: 58.5	4.41463e-06	5.36442e-06	3.78187e-06	3.75786e-06	4.67897e-06	4.66849e-06	6.84783e-06	5.42073e-06	6.22707e-06	3.73448e-06	4.8825e-06	5.0177e-06	1.55117	1.0105	1.64656	0.99378	1.0435	1.0748	-0.644676	-0.989611	-0.607327	-1.00626	-0.958315	-0.930405
comp44535_c0_seq1	comp44535_c0_seq1 len=118 path=[0:0-117]	7.88327e-08	6.09593e-08	0	0	0	0	8.15217e-08	0	0	0	0	0	1.03411	0	0	0	0	0	-0.967014	0	0	0	0	0
comp37861_c0_seq1	comp37861_c0_seq1 len=145 path=[0:0-144]	0	1.82878e-07	0	0	0	0	8.15217e-08	7.03992e-08	0	0	0	0	0	0.384951	0	0	0	0	0	-2.59773	0	0	0	0
comp1907_c0_seq1	comp1907_c0_seq1 len=511 path=[481:0-89 35:90-510] : tr|F2CYT9|F2CYT9_HORVD Predicted protein OS=Hordeum vulgare var. distichum PE=2 SV=1 e-value: 1e-11 blast score: 70.1	3.03506e-05	2.80413e-05	5.37025e-05	8.5982e-05	4.91292e-05	5.8054e-05	6.83967e-05	5.85721e-05	5.15809e-05	5.60172e-05	3.5059e-05	4.83037e-05	2.25356	2.08878	0.960493	0.651499	0.713609	0.832047	-0.443743	-0.478748	-1.04113	-1.53492	-1.40133	-1.20185
comp11388_c0_seq1	comp11388_c0_seq1 len=505 path=[0:0-504] : tr|C5WV82|C5WV82_SORBI Putative uncharacterized protein Sb01g016570 OS=Sorghum bicolor GN=Sb01g016570 PE=4 SV=1 e-value: 6e-15 blast score: 80.9	6.62194e-06	6.21785e-06	1.38038e-05	2.2435e-05	1.27245e-05	1.6477e-05	2.02989e-05	1.3939e-05	9.70384e-06	1.36128e-05	7.52718e-06	1.21763e-05	3.0654	2.24178	0.702983	0.606767	0.59155	0.738986	-0.326222	-0.446075	-1.42251	-1.64808	-1.69048	-1.35321
comp23982_c0_seq1	comp23982_c0_seq1 len=165 path=[0:0-164]	5.51829e-07	1.82878e-07	0	4.48699e-07	4.56485e-07	5.49234e-07	2.44565e-07	2.81597e-07	7.78383e-07	2.40934e-07	2.7125e-07	6.69027e-08	0.443191	1.53981	0	0.536962	0.594214	0.121811	-2.25637	-0.649432	0	-1.86233	-1.68289	-8.20945
comp14464_c0_seq1	comp14464_c0_seq1 len=666 path=[0:0-665]	2.60148e-06	3.10893e-06	3.78187e-06	3.42133e-06	2.91009e-06	2.85602e-06	3.42391e-06	4.50555e-06	3.06164e-06	2.28887e-06	2.37344e-06	2.80991e-06	1.31614	1.44923	0.809558	0.669001	0.815588	0.983857	-0.759797	-0.690022	-1.23524	-1.49477	-1.22611	-1.01641
comp7567_c0_seq1	comp7567_c0_seq1 len=481 path=[0:0-480] : tr|F2DZ48|F2DZ48_HORVD Predicted protein OS=Hordeum vulgare var. distichum PE=2 SV=1 e-value: 1e-11 blast score: 69.7	1.71855e-05	1.3533e-05	4.14114e-05	5.11517e-05	3.73176e-05	2.82306e-05	4.1087e-05	3.09052e-05	2.56348e-05	4.0236e-05	1.99369e-05	2.95041e-05	2.39079	2.2837	0.619026	0.786602	0.534248	1.04511	-0.418272	-0.437886	-1.61544	-1.27129	-1.87179	-0.956839
comp23898_c0_seq1	comp23898_c0_seq1 len=396 path=[0:0-166 167:167-190 191:191-191 192:192-395]	7.88327e-07	3.65756e-07	0	0	0	0	4.8913e-07	3.51996e-07	0	2.40934e-07	0	0	0.620467	0.962379	0	0	0	0	-1.61169	-1.03909	0	0	0	0
comp1276_c0_seq1	comp1276_c0_seq1 len=452 path=[0:0-451] : tr|F2D281|F2D281_HORVD Predicted protein OS=Hordeum vulgare var. distichum PE=2 SV=1 e-value: 3e-18 blast score: 91.7	4.43828e-05	4.45613e-05	5.29461e-05	5.90039e-05	5.60335e-05	5.18477e-05	3.74185e-05	4.59002e-05	6.80826e-05	5.52944e-05	5.88612e-05	5.70011e-05	0.843085	1.03005	1.28588	0.937131	1.05046	1.09939	-1.18612	-0.970828	-0.777675	-1.06709	-0.95196	-0.909592
comp6419_c0_seq1	comp6419_c0_seq1 len=350 path=[0:0-349]	2.48323e-05	2.70659e-05	3.10113e-05	4.47577e-05	3.34946e-05	3.54256e-05	4.96467e-05	4.28731e-05	3.42489e-05	3.67425e-05	2.82778e-05	3.19126e-05	1.99928	1.58402	1.1044	0.820919	0.84425	0.900833	-0.50018	-0.631304	-0.905469	-1.21815	-1.18448	-1.11008
comp5983_c0_seq1	comp5983_c0_seq1 len=661 path=[0:0-351 352:352-660] : tr|F2DXK4|F2DXK4_HORVD Predicted protein OS=Hordeum vulgare var. distichum PE=2 SV=1 e-value: 5e-11 blast score: 68.9	3.35039e-05	3.71852e-05	4.0655e-05	5.63117e-05	4.78168e-05	4.0863e-05	4.46739e-05	3.62556e-05	3.93862e-05	3.36103e-05	3.34315e-05	4.10113e-05	1.3334	0.975	0.96879	0.596862	0.699159	1.00363	-0.749965	-1.02564	-1.03222	-1.67543	-1.43029	-0.996384
comp19914_c0_seq1	comp19914_c0_seq1 len=311 path=[4:0-310]	8.67159e-07	9.75349e-07	3.78187e-07	8.97398e-07	7.41788e-07	1.20831e-06	8.96739e-07	6.33592e-07	8.30275e-07	7.22803e-07	4.06875e-07	7.35929e-07	1.03411	0.649606	2.19541	0.805442	0.548505	0.609054	-0.967014	-1.5394	-0.455495	-1.24155	-1.82314	-1.64189
TC408061	TC408061	4.72996e-07	0	1.13456e-06	1.12175e-06	6.84727e-07	5.49234e-07	9.78261e-07	7.03992e-07	2.59461e-07	8.4327e-07	3.39062e-07	6.02124e-07	2.06822	0	0.228689	0.751746	0.495179	1.0963	-0.483507	0	-4.37275	-1.33024	-2.01947	-0.912161
comp7792_c0_seq1	comp7792_c0_seq1 len=428 path=[0:0-427] : tr|C5YRR9|C5YRR9_SORBI Putative uncharacterized protein Sb08g003160 OS=Sorghum bicolor GN=Sb08g003160 PE=4 SV=1 e-value: 4e-04 blast score: 44.3	4.80879e-06	4.87675e-06	3.97096e-06	6.45005e-06	4.62191e-06	4.94311e-06	9.53804e-06	8.94069e-06	9.08114e-06	9.1555e-06	6.84906e-06	9.43327e-06	1.98346	1.83333	2.28689	1.41945	1.48187	1.90837	-0.50417	-0.545455	-0.437275	-0.7045	-0.674824	-0.524008
TC423063	TC423063 similar to UniRef100_A7PSW3 Cluster: Chromosome chr8 scaffold_29, whole genome shotgun sequence; n=1; Vitis vinifera|Rep: Chromosome chr8 scaffold_29, whole genome shotgun sequence - Vitis vinifera (Grape), partial (76%)	2.36498e-06	2.37741e-06	8.88738e-06	1.08249e-05	5.3637e-06	6.64573e-06	8.72283e-06	7.03992e-06	2.80218e-06	9.63737e-06	1.69531e-06	4.48248e-06	3.68833	2.96117	0.315299	0.890299	0.316071	0.67449	-0.271125	-0.337705	-3.1716	-1.12322	-3.16384	-1.4826
TC437640	TC437640	2.36498e-07	6.70553e-07	3.78187e-07	5.60874e-07	5.70606e-07	6.04157e-07	1.05978e-06	7.74391e-07	5.18922e-07	7.22803e-07	5.425e-07	8.02832e-07	4.48115	1.15485	1.37213	1.28871	0.950743	1.32885	-0.223157	-0.86591	-0.728792	-0.775971	-1.05181	-0.752533
comp15756_c0_seq1	comp15756_c0_seq1 len=231 path=[0:0-194 208:195-230]	5.99128e-06	5.60826e-06	1.0211e-05	1.05444e-05	1.16974e-05	6.59081e-06	5.78804e-06	7.11031e-06	9.44438e-06	1.25286e-05	7.93406e-06	9.43327e-06	0.966078	1.26783	0.924919	1.18817	0.678274	1.43128	-1.03511	-0.78875	-1.08118	-0.84163	-1.47433	-0.698677
comp321_c0_seq1	comp321_c0_seq1 len=375 path=[0:0-374]	0.000130705	0.000133867	0.00015846	0.000172581	0.000177573	0.000152193	0.000157174	0.000151147	0.000153497	0.000153355	0.000140982	0.000160031	1.20251	1.12909	0.96868	0.888595	0.79394	1.0515	-0.831592	-0.885672	-1.03233	-1.12537	-1.25954	-0.95102
CA621357	CA621357 homologue to UniRef100_Q40039 Cluster: Precursor of CP29, core chlorophyll a/b binding (CAB) protein of photosystem II; n=1; Hordeum vulgare|Rep: Precursor of CP29, core chlorophyll a/b binding (CAB) protein of photosystem II - Hordeum vulgare (Barley), partial (23%) #or# CA623887 homologue to UniRef100_Q40039 Cluster: Precursor of CP29, core chlorophyll a/b binding (CAB) protein of phot…	0	6.09593e-08	0	5.60874e-08	0	0	8.15217e-08	7.03992e-08	5.18922e-08	0	0	0	0	1.15485	0	0	0	0	0	-0.86591	0	0	0	0
comp5652_c0_seq1	comp5652_c0_seq1 len=316 path=[0:0-315]	8.11976e-06	9.02198e-06	2.36367e-05	2.10889e-05	1.90012e-05	1.11495e-05	1.39402e-05	1.28126e-05	1.50487e-05	1.40947e-05	9.96843e-06	1.39827e-05	1.71683	1.42016	0.63667	0.668346	0.524622	1.25411	-0.58247	-0.704147	-1.57067	-1.49623	-1.90614	-0.797377
BG909031	BG909031 weakly similar to UniRef100_Q0DIP1 Cluster: Os05g0373500 protein; n=1; Oryza sativa Japonica Group|Rep: Os05g0373500 protein - Oryza sativa subsp. japonica (Rice), partial (5%)	0	6.09593e-08	0	0	0	5.49234e-08	0	0	0	0	0	6.69027e-08	0	0	0	0	0	1.21811	0	0	0	0	0	-0.820945
comp41681_c0_seq1	comp41681_c0_seq1 len=104 path=[0:0-103]	7.88327e-08	6.09593e-08	0	0	0	0	8.15217e-08	1.40798e-07	1.03784e-07	4.81868e-07	6.78124e-08	2.67611e-07	1.03411	2.30971	0	0	0	0	-0.967014	-0.432955	0	0	0	0
comp31016_c0_seq1	comp31016_c0_seq1 len=260 path=[0:0-259]	2.36498e-07	3.65756e-07	1.89093e-07	1.12175e-07	1.71182e-07	5.49234e-08	0	7.03992e-08	0	0	0	0	0	0.192476	0	0	0	0	0	-5.19546	0	0	0	0
TC385432	TC385432	7.17377e-06	4.02332e-06	1.09674e-05	1.49753e-05	8.67321e-06	7.52451e-06	3.08967e-05	2.02046e-05	5.60436e-06	1.27695e-05	3.05156e-06	8.16212e-06	4.3069	5.02187	0.511001	0.852703	0.351837	1.08474	-0.232185	-0.199129	-1.95694	-1.17274	-2.84222	-0.921881
comp12893_c0_seq1	comp12893_c0_seq1 len=255 path=[0:0-254]	1.49782e-06	2.31645e-06	2.64731e-06	2.58002e-06	2.56773e-06	2.08709e-06	9.70109e-06	9.64468e-06	6.48653e-06	7.10756e-06	7.39156e-06	6.69027e-06	6.4768	4.16355	2.45024	2.75485	2.87864	3.20555	-0.154397	-0.240179	-0.408124	-0.362997	-0.347387	-0.311959
comp43850_c0_seq1	comp43850_c0_seq1 len=147 path=[0:0-146]	7.88327e-08	6.09593e-08	0	0	0	0	0	7.03992e-08	0	0	0	0	0	1.15485	0	0	0	0	0	-0.86591	0	0	0	0
CJ567523	CJ567523 similar to UniRef100_UPI000069DC47 Cluster: DEP domain-containing protein 5.; n=1; Xenopus tropicalis|Rep: DEP domain-containing protein 5. - Xenopus tropicalis, partial (4%)	1.34016e-06	1.21919e-06	1.13456e-06	1.3461e-06	1.54064e-06	9.88621e-07	1.1413e-06	1.05599e-06	1.55677e-06	1.20467e-06	8.13749e-07	1.13735e-06	0.851621	0.866141	1.37213	0.894936	0.52819	1.15044	-1.17423	-1.15455	-0.728792	-1.1174	-1.89326	-0.869236
comp40626_c0_seq1	comp40626_c0_seq1 len=173 path=[0:0-172]	7.88327e-08	1.21919e-07	0	0	0	0	8.15217e-08	2.11197e-07	0	0	0	0	1.03411	1.73228	0	0	0	0	-0.967014	-0.577273	0	0	0	0
comp31090_c0_seq1	comp31090_c0_seq1 len=322 path=[0:0-321]	3.15331e-07	2.43837e-07	0	0	0	0	8.15217e-08	1.40798e-07	0	0	0	0	0.258528	0.577427	0	0	0	0	-3.86806	-1.73182	0	0	0	0
comp18545_c0_seq1	comp18545_c0_seq1 len=243 path=[0:0-242]	1.26132e-06	1.34111e-06	1.32365e-06	1.51436e-06	1.5977e-06	1.31816e-06	1.875e-06	1.90078e-06	1.19352e-06	1.32514e-06	1.085e-06	2.34159e-06	1.48654	1.41732	0.901687	0.875048	0.679102	1.77641	-0.672705	-0.705556	-1.10903	-1.14279	-1.47253	-0.562934
BJ318484	BJ318484 emb|Z11889.1|MITTARRNG T.aestivum mitochondrion rrn26 gene for rRNA large subunit (26S), partial (9%)	0	6.09593e-08	0	0	5.70606e-08	5.49234e-08	8.15217e-08	7.03992e-08	5.18922e-08	2.40934e-07	0	6.69027e-08	0	1.15485	0	0	0	1.21811	0	-0.86591	0	0	0	-0.820945
comp20611_c0_seq1	comp20611_c0_seq1 len=464 path=[0:0-463] : tr|B9RQK0|B9RQK0_RICCO Thylakoid membrane phosphoprotein 14 kDa, chloroplast, putative OS=Ricinus communis GN=RCOM_1493520 PE=4 SV=1 e-value: 5e-23 blast score: 107	5.51829e-07	1.15823e-06	0	0	0	0	1.1413e-06	1.26718e-06	5.18922e-08	0	0	0	2.06822	1.09407	0	0	0	0	-0.483507	-0.914016	0	0	0	0
comp22099_c0_seq1	comp22099_c0_seq1 len=258 path=[0:0-257] : tr|F2EC50|F2EC50_HORVD Predicted protein OS=Hordeum vulgare var. distichum PE=2 SV=1 e-value: 4e-11 blast score: 39.3	3.3898e-06	2.19454e-06	2.8364e-06	3.08481e-06	3.08127e-06	2.96586e-06	1.71196e-06	2.60477e-06	3.3211e-06	5.05962e-06	3.255e-06	3.14442e-06	0.505031	1.18693	1.17089	1.64017	1.05638	1.06021	-1.98008	-0.842507	-0.854054	-0.609692	-0.946628	-0.943214
comp34628_c0_seq1	comp34628_c0_seq1 len=181 path=[0:0-180]	7.88327e-08	1.21919e-07	0	0	0	0	8.15217e-08	2.81597e-07	0	0	0	0	1.03411	2.30971	0	0	0	0	-0.967014	-0.432955	0	0	0	0
comp593_c0_seq1	comp593_c0_seq1 len=367 path=[0:0-366] : tr|F2D4U3|F2D4U3_HORVD Predicted protein OS=Hordeum vulgare var. distichum PE=2 SV=1 e-value: 5e-22 blast score: 103	7.08706e-05	6.69333e-05	5.69171e-05	8.42994e-05	0.000100997	7.39818e-05	4.69565e-05	4.8505e-05	8.72827e-05	8.10744e-05	7.14065e-05	7.54662e-05	0.662567	0.724676	1.53351	0.961743	0.707014	1.02006	-1.50928	-1.37993	-0.6521	-1.03978	-1.4144	-0.980331
CA714082	CA714082	2.36498e-07	1.21919e-07	0	5.60874e-08	0	3.2954e-07	1.63043e-07	0	2.07569e-07	0	2.7125e-07	6.69027e-08	0.689408	0	0	0	0	0.203018	-1.45052	0	0	0	0	-4.92567
comp6690_c0_seq1	comp6690_c0_seq1 len=395 path=[0:0-263 264:264-394]	4.49346e-06	5.79114e-06	6.42917e-06	8.4692e-06	7.532e-06	6.75558e-06	8.80435e-06	6.47672e-06	7.78383e-06	6.98709e-06	7.79843e-06	8.63044e-06	1.95937	1.11839	1.21071	0.825001	1.03537	1.27753	-0.510368	-0.894146	-0.825965	-1.21212	-0.965835	-0.782762
comp11101_c0_seq1	comp11101_c0_seq1 len=333 path=[0:0-332] : tr|F2E833|F2E833_HORVD Predicted protein OS=Hordeum vulgare var. distichum PE=2 SV=1 e-value: 7e-08 blast score: 57.0	3.31097e-06	3.04797e-06	4.16005e-06	7.06701e-06	3.88012e-06	4.39387e-06	4.64674e-06	4.22395e-06	5.03355e-06	3.49355e-06	3.05156e-06	4.68319e-06	1.40344	1.38583	1.20997	0.494346	0.78646	1.06584	-0.712537	-0.721592	-0.826466	-2.02288	-1.27152	-0.938223
TC410441	TC410441 homologue to UniRef100_Q9SDL8 Cluster: Fructose-1,6-bisphosphatase, cytosolic; n=1; Oryza coarctata|Rep: Fructose-1,6-bisphosphatase, cytosolic - Oryza coarctata (Wild rice) (Porteresia coarctata), partial (55%)	0	0	0	0	5.70606e-08	1.09847e-07	8.15217e-08	7.03992e-08	5.18922e-08	1.20467e-07	0	2.00708e-07	0	0	0	0	0	1.82716	0	0	0	0	0	-0.547297
BQ170828	BQ170828	2.36498e-07	3.04797e-07	3.78187e-07	3.92612e-07	2.85303e-07	3.2954e-07	5.70652e-07	6.33592e-07	2.07569e-07	6.02335e-07	7.45937e-07	4.68319e-07	2.41293	2.07874	0.548853	1.53418	2.61454	1.42113	-0.414435	-0.481061	-1.82198	-0.651816	-0.382476	-0.703667
comp3709_c0_seq1	comp3709_c0_seq1 len=297 path=[0:0-296]	1.48205e-05	1.53618e-05	1.38038e-05	2.14254e-05	1.91153e-05	2.26284e-05	1.65489e-05	1.68958e-05	1.8785e-05	1.89133e-05	1.90553e-05	1.85989e-05	1.11662	1.09986	1.36086	0.882754	0.996861	0.821927	-0.89556	-0.909205	-0.734832	-1.13282	-1.00315	-1.21665
comp35072_c0_seq1	comp35072_c0_seq1 len=132 path=[0:0-131] : tr|F2DSR3|F2DSR3_HORVD Predicted protein OS=Hordeum vulgare var. distichum PE=2 SV=1 e-value: 1e-17 blast score: 89.4	2.36498e-07	6.09593e-08	0	2.80437e-07	1.14121e-07	5.49234e-08	0	1.40798e-07	1.03784e-07	4.81868e-07	0	0	0	2.30971	0	1.71828	0	0	0	-0.432955	0	-0.581978	0	0
DN177882	DN177882 homologue to UniRef100_Q68V18 Cluster: RAB1-like; n=1; Poa pratensis|Rep: RAB1-like - Poa pratensis (Kentucky bluegrass) (Phalaris japonica), partial (24%) #or# TC243020 homologue to UniRef100_Q68V18 Cluster: RAB1-like; n=1; Poa pratensis|Rep: RAB1-like - Poa pratensis (Kentucky bluegrass) (Phalaris japonica), complete	7.01611e-06	6.27881e-06	1.13456e-05	1.31805e-05	1.0328e-05	1.04904e-05	1.63043e-05	1.31646e-05	1.32844e-05	1.30104e-05	9.90062e-06	1.2377e-05	2.32385	2.09668	1.17089	0.987095	0.958622	1.17984	-0.430321	-0.476945	-0.854054	-1.01307	-1.04316	-0.84757
EY701234	EY701234 similar to UniRef100_A7PCR3 Cluster: Chromosome chr17 scaffold_12, whole genome shotgun sequence; n=1; Vitis vinifera|Rep: Chromosome chr17 scaffold_12, whole genome shotgun sequence - Vitis vinifera (Grape), partial (17%)	7.88327e-08	6.09593e-08	0	0	0	0	0	7.03992e-08	0	0	0	0	0	1.15485	0	0	0	0	0	-0.86591	0	0	0	0
comp3698_c0_seq1	comp3698_c0_seq1 len=395 path=[5:0-394]	6.14895e-06	7.07128e-06	5.4837e-06	5.60874e-06	6.61903e-06	7.30481e-06	5.54348e-06	6.75832e-06	7.93951e-06	5.78242e-06	8.54437e-06	6.08814e-06	0.901533	0.955742	1.44784	1.03097	1.29088	0.833442	-1.10922	-1.04631	-0.690686	-0.969964	-0.774666	-1.19984
comp37694_c0_seq1	comp37694_c0_seq1 len=146 path=[0:0-145] : tr|B9FZ43|B9FZ43_ORYSJ Putative uncharacterized protein OS=Oryza sativa subsp. japonica GN=OsJ_26066 PE=3 SV=1 e-value: 4e-06 blast score: 51.2	7.88327e-08	6.09593e-08	3.78187e-07	1.12175e-07	1.14121e-07	0	0	7.03992e-08	1.55677e-07	0	0	2.00708e-07	0	1.15485	0.41164	0	0	0	0	-0.86591	-2.42931	0	0	0
TC11968	TC11968 similar to UniRef100_A7QA89 Cluster: Chromosome undetermined scaffold_70, whole genome shotgun sequence; n=1; Vitis vinifera|Rep: Chromosome undetermined scaffold_70, whole genome shotgun sequence - Vitis vinifera (Grape), partial (24%)	0	6.09593e-08	0	0	0	0	1.63043e-07	7.03992e-08	0	0	0	0	0	1.15485	0	0	0	0	0	-0.86591	0	0	0	0
comp27847_c0_seq1	comp27847_c0_seq1 len=226 path=[0:0-225]	7.88327e-08	3.65756e-07	1.89093e-07	3.92612e-07	3.42364e-07	2.74617e-07	3.26087e-07	2.11197e-07	2.07569e-07	1.20467e-07	4.06875e-07	2.67611e-07	4.13645	0.577427	1.09771	0.306835	1.18843	0.974487	-0.241753	-1.73182	-0.91099	-3.25908	-0.841447	-1.02618
comp13334_c0_seq1	comp13334_c0_seq1 len=381 path=[0:0-380] : tr|F2ED42|F2ED42_HORVD Predicted protein OS=Hordeum vulgare var. distichum PE=2 SV=1 e-value: 1e-10 blast score: 66.2	1.73432e-06	2.56029e-06	2.26912e-06	2.69219e-06	2.28242e-06	2.52648e-06	1.46739e-06	2.25277e-06	3.00975e-06	2.77074e-06	2.98375e-06	2.27469e-06	0.846091	0.879889	1.3264	1.02918	1.30727	0.900341	-1.18191	-1.13651	-0.753923	-0.971651	-0.764952	-1.11069
comp1775_c0_seq1	comp1775_c0_seq1 len=364 path=[0:0-23 53:24-255 285:256-279 430:280-363]	9.93291e-06	1.32282e-05	9.26557e-06	1.04323e-05	1.27816e-05	1.0051e-05	1.1413e-05	9.92628e-06	1.19352e-05	5.54149e-06	1.01719e-05	9.23257e-06	1.14901	0.750389	1.28812	0.531188	0.795823	0.918573	-0.870313	-1.33264	-0.776322	-1.88257	-1.25656	-1.08864
comp34872_c0_seq1	comp34872_c0_seq1 len=267 path=[0:0-266]	1.57665e-07	4.26715e-07	7.56373e-07	2.2435e-07	2.85303e-07	6.59081e-07	6.52174e-07	2.11197e-07	2.59461e-07	9.63737e-07	1.35625e-07	6.02124e-07	4.13645	0.494938	0.343033	4.29569	0.475371	0.913581	-0.241753	-2.02046	-2.91517	-0.232791	-2.10362	-1.09459
comp2838_c0_seq1	comp2838_c0_seq1 len=442 path=[0:0-138 139:139-178 442:179-184 185:185-441]	9.53875e-06	1.29843e-05	1.05892e-05	1.07127e-05	1.01568e-05	1.04904e-05	1.02717e-05	9.50389e-06	1.3959e-05	1.03602e-05	1.21384e-05	1.35812e-05	1.07684	0.73195	1.31823	0.967093	1.1951	1.29464	-0.92864	-1.36621	-0.758594	-1.03403	-0.836747	-0.772416
TC373459	TC373459 similar to UniRef100_A7Q8U5 Cluster: Chromosome chr5 scaffold_64, whole genome shotgun sequence; n=1; Vitis vinifera|Rep: Chromosome chr5 scaffold_64, whole genome shotgun sequence - Vitis vinifera (Grape), partial (39%)	7.2526e-06	8.90006e-06	1.30474e-05	1.39658e-05	1.58058e-05	9.99606e-06	9.94565e-06	9.08149e-06	1.31806e-05	1.4697e-05	9.29031e-06	1.09051e-05	1.37132	1.02039	1.01021	1.05236	0.587779	1.09094	-0.729224	-0.980022	-0.989895	-0.950247	-1.70132	-0.916638
comp7448_c0_seq1	comp7448_c0_seq1 len=537 path=[0:0-536] : tr|F2DK11|F2DK11_HORVD Predicted protein OS=Hordeum vulgare var. distichum PE=2 SV=1 e-value: 1e-06 blast score: 53.5	1.71067e-05	1.91412e-05	1.24802e-05	1.43023e-05	1.28386e-05	1.65319e-05	1.93207e-05	1.68958e-05	2.00304e-05	1.40947e-05	1.89197e-05	1.55883e-05	1.12942	0.882691	1.60498	0.985482	1.47365	0.942921	-0.885409	-1.1329	-0.623061	-1.01473	-0.678587	-1.06053
comp12389_c0_seq1	comp12389_c0_seq1 len=291 path=[0:0-290] : tr|F2E9Q6|F2E9Q6_HORVD Predicted protein OS=Hordeum vulgare var. distichum PE=2 SV=1 e-value: 5e-09 blast score: 60.8	6.22778e-06	7.86375e-06	1.49384e-05	1.05444e-05	1.19827e-05	9.00744e-06	1.09239e-05	8.4479e-06	1.17795e-05	9.99877e-06	8.13749e-06	1.11727e-05	1.75406	1.07428	0.788542	0.948251	0.679102	1.24039	-0.570105	-0.930853	-1.26816	-1.05457	-1.47253	-0.806198
comp18360_c0_seq1	comp18360_c0_seq1 len=478 path=[0:0-477]	1.18249e-06	1.76782e-06	1.51275e-06	1.45827e-06	1.65476e-06	1.48293e-06	1.71196e-06	1.19679e-06	2.0238e-06	1.44561e-06	1.22062e-06	1.73947e-06	1.44776	0.676984	1.33783	0.991314	0.737645	1.17299	-0.690724	-1.47714	-0.747479	-1.00876	-1.35567	-0.85252
comp182_c0_seq1	comp182_c0_seq1 len=488 path=[0:0-487]	0.000208039	0.000198849	0.000411845	0.000384928	0.000382306	0.000238642	0.000249538	0.00025224	0.000316439	0.000324418	0.000219916	0.000287012	1.19948	1.2685	0.768344	0.842802	0.575235	1.20269	-0.833698	-0.788333	-1.3015	-1.18652	-1.73842	-0.83147
comp17165_c0_seq1	comp17165_c0_seq1 len=245 path=[0:0-244]	7.09494e-07	1.28015e-06	9.45466e-07	1.85088e-06	1.99712e-06	2.14201e-06	1.79348e-06	1.75998e-06	1.60866e-06	1.80701e-06	9.49374e-07	1.67257e-06	2.52783	1.37483	1.70144	0.976294	0.475371	0.780839	-0.395597	-0.727364	-0.587736	-1.02428	-2.10362	-1.28067
BJ229545	BJ229545	1.57665e-07	0	1.89093e-07	5.60874e-08	5.70606e-08	2.19694e-07	2.44565e-07	7.03992e-08	0	0	1.35625e-07	2.00708e-07	1.55117	0	0	0	2.37686	0.913581	-0.644676	0	0	0	-0.420724	-1.09459
comp38547_c0_seq1	comp38547_c0_seq1 len=106 path=[0:0-105]	0	6.09593e-08	0	0	5.70606e-08	5.49234e-08	0	0	0	0	0	6.69027e-08	0	0	0	0	0	1.21811	0	0	0	0	0	-0.820945
comp5849_c0_seq1	comp5849_c0_seq1 len=414 path=[0:0-413] : tr|A2ZRP7|A2ZRP7_ORYSJ Putative uncharacterized protein OS=Oryza sativa subsp. japonica GN=OsJ_01257 PE=4 SV=1 e-value: 5e-08 blast score: 57.4	1.21402e-05	1.06069e-05	2.09894e-05	1.83406e-05	1.74035e-05	1.48842e-05	1.59783e-05	1.42206e-05	1.52563e-05	1.54198e-05	1.1935e-05	1.53207e-05	1.31614	1.34069	0.72686	0.840747	0.685782	1.02932	-0.759797	-0.745883	-1.37578	-1.18942	-1.45819	-0.971512
TC457757	TC457757 homologue to gb|AF223066.1|AF223066 Humulus lupulus 26S ribosomal RNA gene, partial sequence; 18S ribosomal RNA gene, internal transcribed spacer 1, 5.8S ribosomal RNA gene, internal transcribed spacer 2 and 26S ribosomal RNA gene, complete sequence; and 18S ribosomal RNA gene, partial sequence, partial (6%)	3.07447e-06	3.5966e-06	4.72733e-06	4.54308e-06	4.73603e-06	2.03217e-06	1.46739e-06	8.4479e-07	2.6465e-06	2.04794e-06	1.01719e-06	1.67257e-06	0.477282	0.234886	0.55983	0.450783	0.214776	0.823046	-2.0952	-4.25739	-1.78626	-2.21836	-4.65601	-1.215
EY710835	EY710835	0	1.21919e-07	0	0	0	0	2.44565e-07	1.40798e-07	5.18922e-08	0	0	0	0	1.15485	0	0	0	0	0	-0.86591	0	0	0	0
comp9836_c0_seq1	comp9836_c0_seq1 len=650 path=[0:0-649] : tr|F2D047|F2D047_HORVD Predicted protein OS=Hordeum vulgare var. distichum PE=2 SV=1 e-value: 2e-20 blast score: 100	5.20296e-06	7.01032e-06	1.13456e-06	2.35567e-06	3.99424e-06	4.06433e-06	2.69022e-06	4.22395e-06	4.04759e-06	1.0842e-06	6.84906e-06	5.95434e-06	0.517056	0.602533	3.56755	0.460253	1.71473	1.46502	-1.93403	-1.65966	-0.280305	-2.17272	-0.583181	-0.682584
comp38911_c0_seq1	comp38911_c0_seq1 len=151 path=[0:0-150]	7.88327e-08	0	3.78187e-07	5.60874e-08	0	5.49234e-08	4.07609e-07	2.11197e-07	2.59461e-07	2.40934e-07	4.06875e-07	5.35221e-07	5.17056	0	0.686067	4.29569	0	9.74487	-0.193403	0	-1.45758	-0.232791	0	-0.102618
TC387282	TC387282 similar to UniRef100_Q10H93 Cluster: Expressed protein; n=2; Oryza sativa Japonica Group|Rep: Expressed protein - Oryza sativa subsp. japonica (Rice), partial (31%) #or# TC424350 similar to UniRef100_Q10H93 Cluster: Expressed protein; n=2; Oryza sativa Japonica Group|Rep: Expressed protein - Oryza sativa subsp. japonica (Rice), partial (21%)	1.57665e-07	6.09593e-08	3.78187e-07	1.68262e-07	1.14121e-07	0	8.15217e-08	0	2.59461e-07	0	0	6.69027e-08	0.517056	0	0.686067	0	0	0	-1.93403	0	-1.45758	0	0	0
comp1632_c0_seq1	comp1632_c0_seq1 len=546 path=[0:0-545] : tr|F2D669|F2D669_HORVD Predicted protein OS=Hordeum vulgare var. distichum PE=2 SV=1 e-value: 8e-07 blast score: 54.3	3.38192e-05	2.94434e-05	3.42259e-05	3.76907e-05	4.66756e-05	3.35582e-05	4.89946e-05	4.28027e-05	3.60651e-05	3.8429e-05	3.13972e-05	5.05784e-05	1.44872	1.45373	1.05374	1.01959	0.672668	1.50718	-0.690264	-0.687886	-0.949003	-0.980789	-1.48662	-0.663489
comp2730_c0_seq1	comp2730_c0_seq1 len=522 path=[0:0-521]	3.53959e-05	3.32228e-05	3.10113e-05	4.29629e-05	4.90721e-05	3.10317e-05	3.5625e-05	2.84413e-05	3.71029e-05	3.32489e-05	3.60762e-05	4.07437e-05	1.00647	0.856076	1.19643	0.773898	0.735167	1.31297	-0.993568	-1.16812	-0.835818	-1.29216	-1.36023	-0.761632
comp28502_c0_seq1	comp28502_c0_seq1 len=159 path=[0:0-158]	3.15331e-07	3.65756e-07	1.89093e-07	3.92612e-07	4.56485e-07	2.74617e-07	4.8913e-07	3.51996e-07	1.03784e-06	4.81868e-07	4.74687e-07	7.35929e-07	1.55117	0.962379	5.48853	1.22734	1.03987	2.67984	-0.644676	-1.03909	-0.182198	-0.81477	-0.961654	-0.373157
comp41091_c0_seq1	comp41091_c0_seq1 len=124 path=[0:0-123] : tr|Q10NX4|Q10NX4_ORYSJ FAR1 family protein, expressed OS=Oryza sativa subsp. japonica GN=Os03g0255400 PE=2 SV=1 e-value: 2e-04 blast score: 45.4	7.88327e-08	0	0	5.60874e-08	0	5.49234e-08	8.15217e-08	7.03992e-08	1.03784e-07	0	1.35625e-07	0	1.03411	0	0	0	0	0	-0.967014	0	0	0	0	0
comp20036_c0_seq1	comp20036_c0_seq1 len=219 path=[0:0-218]	1.89198e-06	1.34111e-06	2.45821e-06	3.19698e-06	3.42364e-06	2.96586e-06	2.52717e-06	1.61918e-06	3.06164e-06	2.77074e-06	3.52625e-06	2.34159e-06	1.33573	1.20735	1.24547	0.866675	1.02997	0.789515	-0.748656	-0.828262	-0.802907	-1.15384	-0.970901	-1.2666
TC393027	TC393027 homologue to UniRef100_Q0DNU9 Cluster: Os03g0733800 protein; n=1; Oryza sativa Japonica Group|Rep: Os03g0733800 protein - Oryza sativa subsp. japonica (Rice), partial (21%) #or# TC393344 homologue to UniRef100_Q0DNU9 Cluster: Os03g0733800 protein; n=1; Oryza sativa Japonica Group|Rep: Os03g0733800 protein - Oryza sativa subsp. japonica (Rice), partial (75%)	1.34016e-06	9.1439e-07	2.08003e-06	3.14089e-06	8.55909e-07	1.37309e-06	1.30435e-06	1.83038e-06	1.92001e-06	2.77074e-06	7.45937e-07	1.53876e-06	0.973281	2.00175	0.923071	0.882151	0.871514	1.12066	-1.02745	-0.499563	-1.08334	-1.13359	-1.14743	-0.892332
comp5861_c0_seq1	comp5861_c0_seq1 len=351 path=[0:0-350]	5.91245e-06	5.60826e-06	7.94192e-06	8.30093e-06	7.58906e-06	6.92035e-06	8.39674e-06	7.81431e-06	9.02925e-06	9.8783e-06	6.44218e-06	7.96142e-06	1.42018	1.39336	1.13691	1.19002	0.848877	1.15044	-0.704136	-0.717691	-0.879577	-0.84032	-1.17803	-0.869236
comp830_c0_seq1	comp830_c0_seq1 len=455 path=[0:0-454] : tr|F2CQ64|F2CQ64_HORVD Predicted protein (Fragment) OS=Hordeum vulgare var. distichum PE=2 SV=1 e-value: 1e-16 blast score: 86.3	6.46428e-05	6.73601e-05	5.8808e-05	5.81065e-05	6.24814e-05	7.28284e-05	4.09239e-05	4.62522e-05	7.39983e-05	6.4209e-05	7.51362e-05	6.32899e-05	0.633078	0.686642	1.2583	1.10502	1.20254	0.869027	-1.57958	-1.45636	-0.794721	-0.90496	-0.831575	-1.15071
comp26773_c0_seq1	comp26773_c0_seq1 len=391 path=[0:0-390]	9.45992e-07	7.31512e-07	2.45821e-06	1.62653e-06	1.5977e-06	8.78775e-07	1.63043e-06	7.03992e-07	1.29731e-06	1.0842e-06	8.81562e-07	8.69734e-07	1.72352	0.962379	0.527743	0.666573	0.55177	0.989713	-0.580208	-1.03909	-1.89486	-1.50021	-1.81235	-1.01039
comp2397_c0_seq1	comp2397_c0_seq1 len=440 path=[0:0-439] : tr|F2DEP3|F2DEP3_HORVD Predicted protein OS=Hordeum vulgare var. distichum PE=2 SV=1 e-value: 1e-10 blast score: 66.2	3.4371e-05	3.63318e-05	2.51494e-05	5.62557e-05	4.12548e-05	5.49234e-05	4.11685e-05	3.40732e-05	2.67764e-05	2.90326e-05	3.26856e-05	4.40888e-05	1.19777	0.937835	1.06469	0.516083	0.792286	0.802733	-0.834887	-1.06629	-0.939238	-1.93767	-1.26217	-1.24574
comp11416_c0_seq1	comp11416_c0_seq1 len=389 path=[0:0-120 394:121-121 121:122-388]	1.41899e-06	1.82878e-06	3.78187e-07	2.35567e-06	1.54064e-06	1.92232e-06	1.38587e-06	2.04158e-06	1.86812e-06	9.63737e-07	2.64469e-06	1.60566e-06	0.976661	1.11636	4.93968	0.409114	1.71662	0.835274	-1.0239	-0.895769	-0.202442	-2.44431	-0.582541	-1.19721
comp1828_c0_seq1	comp1828_c0_seq1 len=406 path=[0:0-107 418:108-405]	3.02717e-05	2.71879e-05	2.13675e-05	2.06402e-05	2.43649e-05	2.75166e-05	1.56522e-05	1.40094e-05	1.48931e-05	1.44561e-05	1.85128e-05	1.31129e-05	0.517056	0.515283	0.696995	0.700385	0.759815	0.476545	-1.93403	-1.94068	-1.43473	-1.42779	-1.31611	-2.09844
CB291734	CB291734 weakly similar to UniRef100_A7PQJ6 Cluster: Chromosome chr6 scaffold_25, whole genome shotgun sequence; n=1; Vitis vinifera|Rep: Chromosome chr6 scaffold_25, whole genome shotgun sequence - Vitis vinifera (Grape), partial (53%)	7.88327e-08	6.09593e-08	0	0	0	0	2.44565e-07	0	0	0	0	0	3.10233	0	0	0	0	0	-0.322338	0	0	0	0	0
comp20256_c0_seq1	comp20256_c0_seq1 len=285 path=[0:0-266 267:267-271 272:272-284]	7.09494e-07	5.48634e-07	0	0	0	0	8.96739e-07	8.4479e-07	0	0	0	0	1.26391	1.53981	0	0	0	0	-0.791193	-0.649432	0	0	0	0
comp20281_c0_seq1	comp20281_c0_seq1 len=401 path=[0:0-400]	7.88327e-07	1.03631e-06	3.78187e-07	1.85088e-06	1.25533e-06	1.15339e-06	8.96739e-07	1.05599e-06	1.86812e-06	7.22803e-07	2.30562e-06	1.53876e-06	1.13752	1.01899	4.93968	0.390517	1.83666	1.33412	-0.879104	-0.981365	-0.202442	-2.5607	-0.544466	-0.749559
comp13036_c0_seq1	comp13036_c0_seq1 len=408 path=[0:0-407] : tr|C5YD56|C5YD56_SORBI Putative uncharacterized protein Sb06g002990 OS=Sorghum bicolor GN=Sb06g002990 PE=3 SV=1 e-value: 4e-35 blast score: 147	2.68031e-06	1.52398e-06	4.34914e-06	5.94526e-06	5.53488e-06	4.72341e-06	4.40217e-06	4.99834e-06	7.42059e-06	6.02335e-06	3.255e-06	3.61274e-06	1.64241	3.27979	1.70622	1.01313	0.588088	0.764859	-0.608861	-0.304898	-0.586092	-0.987035	-1.70042	-1.30743
TC439001	TC439001 UniRef100_Q8LK61 Cluster: NADP-dependent glyceraldehyde-3-phosphate dehydrogenase; n=1; Triticum aestivum|Rep: NADP-dependent glyceraldehyde-3-phosphate dehydrogenase - Triticum aestivum (Wheat), complete	4.72996e-07	4.26715e-07	3.78187e-07	3.92612e-07	2.28242e-07	5.49234e-08	0	2.81597e-07	2.59461e-07	3.61401e-07	2.03437e-07	0	0	0.659917	0.686067	0.920505	0.891321	0	0	-1.51534	-1.45758	-1.08636	-1.12193	0
TC385853	TC385853 homologue to UniRef100_Q2QMY3 Cluster: Leucine Rich Repeat family protein, expressed; n=1; Oryza sativa Japonica Group|Rep: Leucine Rich Repeat family protein, expressed - Oryza sativa subsp. japonica (Rice), partial (31%) #or# TC438288 similar to UniRef100_Q2QMY3 Cluster: Leucine Rich Repeat family protein, expressed; n=1; Oryza sativa Japonica Group|Rep: Leucine Rich Repeat family prot…	7.88327e-07	7.92471e-07	2.26912e-06	1.40218e-06	1.31239e-06	1.04354e-06	1.1413e-06	1.12639e-06	1.3492e-06	1.20467e-06	8.81562e-07	1.13735e-06	1.44776	1.42136	0.594591	0.859138	0.67172	1.08989	-0.690724	-0.703552	-1.68183	-1.16396	-1.48871	-0.917527
comp7607_c0_seq2	comp7607_c0_seq2 len=250 path=[0:0-226 359:227-249]	3.15331e-07	7.31512e-07	3.78187e-07	1.29001e-06	6.27667e-07	1.20831e-06	1.22283e-06	4.22395e-07	5.18922e-07	3.61401e-07	8.13749e-07	1.33805e-06	3.87792	0.577427	1.37213	0.280154	1.29647	1.10737	-0.25787	-1.73182	-0.728792	-3.56947	-0.771327	-0.90304
comp27514_c0_seq1	comp27514_c0_seq1 len=230 path=[0:0-229]	4.72996e-07	3.04797e-07	1.13456e-06	3.92612e-07	5.70606e-07	4.94311e-07	2.44565e-07	1.40798e-07	2.07569e-07	6.02335e-07	2.03437e-07	2.67611e-07	0.517056	0.461942	0.182951	1.53418	0.356529	0.541381	-1.93403	-2.16477	-5.46594	-0.651816	-2.80482	-1.84713
FD523193	FD523193 homologue to UniRef100_Q59IV5 Cluster: Plastidic phosphate translocator-like protein2; n=1; Mesembryanthemum crystallinum|Rep: Plastidic phosphate translocator-like protein2 - Mesembryanthemum crystallinum (Common ice plant), partial (16%)	0	6.09593e-08	0	0	5.70606e-08	5.49234e-08	0	7.03992e-08	0	0	0	6.69027e-08	0	1.15485	0	0	0	1.21811	0	-0.86591	0	0	0	-0.820945
comp30001_c0_seq1	comp30001_c0_seq1 len=206 path=[0:0-205]	3.94163e-07	1.82878e-07	3.78187e-07	2.80437e-07	5.13545e-07	2.19694e-07	3.26087e-07	7.03992e-08	1.55677e-07	0	6.78124e-08	4.01416e-07	0.827289	0.384951	0.41164	0	0.132048	1.82716	-1.20877	-2.59773	-2.42931	0	-7.57303	-0.547297
comp2256_c0_seq1	comp2256_c0_seq1 len=379 path=[0:0-378]	1.75797e-05	1.67029e-05	3.40368e-05	3.4662e-05	2.63049e-05	2.53746e-05	2.7962e-05	2.23165e-05	2.4078e-05	2.89121e-05	2.0615e-05	2.82998e-05	1.59058	1.33609	0.707411	0.834115	0.783692	1.11528	-0.6287	-0.748452	-1.41361	-1.19888	-1.27601	-0.896635
CA596151	CA596151 weakly similar to UniRef100_Q2W559 Cluster: NodQ bifunctional enzyme; n=1; Magnetospirillum magneticum AMB-1|Rep: NodQ bifunctional enzyme - Magnetospirillum magneticum (strain AMB-1 / ATCC 700264), partial (3%)	1.34016e-06	1.03631e-06	1.13456e-06	1.96306e-06	1.71182e-06	7.68928e-07	3.26087e-07	0	0	0	0	6.69027e-08	0.24332	0	0	0	0	0.0870077	-4.10981	0	0	0	0	-11.4932
comp17490_c0_seq1	comp17490_c0_seq1 len=607 path=[0:0-205 219:206-354 368:355-606] : tr|C5X4X6|C5X4X6_SORBI Putative uncharacterized protein Sb02g042450 OS=Sorghum bicolor GN=Sb02g042450 PE=4 SV=1 e-value: 5e-17 blast score: 88.6 #or# comp17490_c0_seq2 len=229 path=[0:0-205 626:206-228]	6.70078e-06	6.8884e-06	1.6262e-05	1.35171e-05	1.52352e-05	9.22713e-06	7.25544e-06	8.0255e-06	1.14682e-05	1.18058e-05	9.96843e-06	1.02361e-05	1.08278	1.16507	0.705213	0.873398	0.654303	1.10935	-0.923553	-0.858314	-1.41801	-1.14495	-1.52834	-0.90143
comp28490_c0_seq1	comp28490_c0_seq1 len=224 path=[0:0-223]	2.36498e-07	3.65756e-07	1.89093e-07	2.2435e-07	1.14121e-07	2.74617e-07	8.96739e-07	1.40798e-07	1.03784e-07	0	3.39062e-07	3.34513e-07	3.79174	0.384951	0.548853	0	2.97107	1.21811	-0.263731	-2.59773	-1.82198	0	-0.336579	-0.820945
comp8542_c0_seq1	comp8542_c0_seq1 len=372 path=[0:0-371]	4.57229e-06	4.14523e-06	4.34914e-06	6.16961e-06	4.85015e-06	5.21772e-06	6.3587e-06	6.33592e-06	5.50058e-06	4.93915e-06	6.64562e-06	5.0177e-06	1.3907	1.52848	1.26475	0.800561	1.37019	0.961664	-0.719062	-0.654243	-0.790671	-1.24912	-0.729827	-1.03986
comp11940_c0_seq1	comp11940_c0_seq1 len=556 path=[0:0-555]	4.02047e-06	4.69387e-06	3.21459e-06	8.63746e-06	7.87436e-06	6.8105e-06	7.17391e-06	6.05433e-06	7.47248e-06	6.38476e-06	6.17093e-06	6.22195e-06	1.78435	1.28984	2.32455	0.739194	0.783674	0.913581	-0.560429	-0.775291	-0.43019	-1.35283	-1.27604	-1.09459
comp32077_c0_seq1	comp32077_c0_seq1 len=131 path=[0:0-130] : tr|F2DIX2|F2DIX2_HORVD Predicted protein OS=Hordeum vulgare var. distichum PE=2 SV=1 e-value: 3e-15 blast score: 81.3	0	2.43837e-07	0	0	5.70606e-08	5.49234e-08	8.15217e-08	7.03992e-08	1.03784e-07	2.40934e-07	6.78124e-08	1.33805e-07	0	0.288714	0	0	1.18843	2.43622	0	-3.46364	0	0	-0.841447	-0.410473
BQ166164	BQ166164 weakly similar to UniRef100_A7RGE7 Cluster: Predicted protein; n=1; Nematostella vectensis|Rep: Predicted protein - Nematostella vectensis (Starlet sea anemone), partial (12%)	9.45992e-07	9.75349e-07	3.78187e-07	6.73049e-07	5.70606e-07	6.04157e-07	6.52174e-07	1.05599e-06	8.82168e-07	6.02335e-07	1.15281e-06	6.02124e-07	0.689408	1.08268	2.33263	0.894936	2.02033	0.996634	-1.45052	-0.923637	-0.428701	-1.1174	-0.494969	-1.00338
CD900600	CD900600 #or# TC405485 similar to UniRef100_A7PI53 Cluster: Chorismate synthase; n=1; Vitis vinifera|Rep: Chorismate synthase - Vitis vinifera (Grape), partial (75%)	9.22342e-06	7.74183e-06	8.5092e-06	1.20588e-05	6.96139e-06	1.25225e-05	1.37772e-05	1.62622e-05	1.29212e-05	1.16853e-05	9.76499e-06	1.05706e-05	1.49372	2.10056	1.51849	0.969028	1.40274	0.844128	-0.669471	-0.476063	-0.658547	-1.03196	-0.712893	-1.18466
BE195482	BE195482 homologue to UniRef100_Q7XYD3 Cluster: Oxygen-evolving complex; n=1; Triticum aestivum|Rep: Oxygen-evolving complex - Triticum aestivum (Wheat), partial (79%) #or# TC279048 homologue to UniRef100_Q7XYD3 Cluster: Oxygen-evolving complex; n=1; Triticum aestivum|Rep: Oxygen-evolving complex - Triticum aestivum (Wheat), partial (64%)	7.88327e-08	6.09593e-08	0	0	5.70606e-08	5.49234e-08	1.63043e-07	7.03992e-08	1.03784e-07	1.20467e-07	1.35625e-07	6.69027e-08	2.06822	1.15485	0	0	2.37686	1.21811	-0.483507	-0.86591	0	0	-0.420724	-0.820945
TC387836	TC387836 similar to UniRef100_A7PJK9 Cluster: Chromosome chr12 scaffold_18, whole genome shotgun sequence; n=1; Vitis vinifera|Rep: Chromosome chr12 scaffold_18, whole genome shotgun sequence - Vitis vinifera (Grape), partial (73%) #or# TC442026 similar to UniRef100_A7PJK9 Cluster: Chromosome chr12 scaffold_18, whole genome shotgun sequence; n=1; Vitis vinifera|Rep: Chromosome chr12 scaffold_18, …	2.36498e-07	2.43837e-07	7.56373e-07	1.12175e-06	1.02709e-06	4.39387e-07	4.8913e-07	2.11197e-07	5.70814e-07	9.63737e-07	8.81562e-07	1.13735e-06	2.06822	0.866141	0.754673	0.859138	0.858309	2.58848	-0.483507	-1.15455	-1.32508	-1.16396	-1.16508	-0.386327
CK152524	CK152524	7.88327e-08	6.09593e-08	0	0	0	1.09847e-07	8.15217e-08	0	0	0	0	6.69027e-08	1.03411	0	0	0	0	0.609054	-0.967014	0	0	0	0	-1.64189
comp28875_c0_seq1	comp28875_c0_seq1 len=307 path=[0:0-306]	7.88327e-07	3.65756e-07	0	0	0	0	0	1.40798e-07	0	0	0	0	0	0.384951	0	0	0	0	0	-2.59773	0	0	0	0
comp3036_c0_seq1	comp3036_c0_seq1 len=444 path=[0:0-443]	0.000110523	0.000110946	0.00014598	0.000176395	0.000141396	0.000166363	0.000171196	0.000166705	0.000122777	0.000136128	0.000117858	0.000150665	1.54895	1.50258	0.841054	0.771722	0.833531	0.905639	-0.645597	-0.665522	-1.18898	-1.2958	-1.19972	-1.10419
CA666345	CA666345	2.52265e-06	2.86509e-06	6.05098e-06	6.61831e-06	4.73603e-06	3.89956e-06	5.29891e-06	3.80155e-06	3.58056e-06	4.21635e-06	2.91594e-06	4.54938e-06	2.10054	1.32685	0.591732	0.637073	0.615692	1.16664	-0.476068	-0.753662	-1.68995	-1.56968	-1.62419	-0.857163
TC276334	TC276334 homologue to UniRef100_P51823 Cluster: ADP-ribosylation factor 2; n=5; BEP clade|Rep: ADP-ribosylation factor 2 - Oryza sativa subsp. japonica (Rice), partial (97%)	7.88327e-08	0	0	1.68262e-07	1.14121e-07	0	1.63043e-07	7.03992e-08	0	0	0	0	2.06822	0	0	0	0	0	-0.483507	0	0	0	0	0
TC19964	TC19964	2.36498e-07	3.65756e-07	0	0	0	0	3.26087e-07	1.40798e-07	0	1.20467e-07	0	0	1.37882	0.384951	0	0	0	0	-0.72526	-2.59773	0	0	0	0
comp27267_c0_seq1	comp27267_c0_seq1 len=287 path=[0:0-286] : tr|F2EA77|F2EA77_HORVD Predicted protein OS=Hordeum vulgare var. distichum PE=2 SV=1 e-value: 1e-05 blast score: 49.3	7.88327e-08	1.82878e-07	3.78187e-07	4.48699e-07	3.99424e-07	2.19694e-07	8.15217e-07	2.11197e-07	6.74599e-07	7.22803e-07	4.06875e-07	4.01416e-07	10.3411	1.15485	1.78377	1.61088	1.01865	1.82716	-0.0967014	-0.86591	-0.560609	-0.620777	-0.981689	-0.547297
comp3640_c0_seq1	comp3640_c0_seq1 len=565 path=[0:0-236 558:237-245 591:246-247 593:248-327 343:328-564] : tr|F2DNU6|F2DNU6_HORVD Predicted protein OS=Hordeum vulgare var. distichum PE=2 SV=1 e-value: 5e-33 blast score: 141 #or# comp3640_c0_seq2 len=148 path=[605:0-44 593:45-124 669:125-147]	0	6.09593e-08	5.6728e-07	6.16961e-07	5.13545e-07	1.09847e-07	5.70652e-07	3.51996e-07	1.55677e-07	0	6.78124e-08	4.01416e-07	0	5.77427	0.274427	0	0.132048	3.65432	0	-0.173182	-3.64396	0	-7.57303	-0.273648
comp20487_c0_seq1	comp20487_c0_seq1 len=183 path=[0:0-182]	3.94163e-07	4.87675e-07	0	1.68262e-07	1.71182e-07	4.39387e-07	4.8913e-07	4.92794e-07	1.60866e-06	4.81868e-07	8.81562e-07	5.35221e-07	1.24093	1.0105	0	2.86379	5.14986	1.21811	-0.805845	-0.989611	0	-0.349187	-0.19418	-0.820945
TC14204	TC14204 similar to UniRef100_A7NZN7 Cluster: Chromosome chr6 scaffold_3, whole genome shotgun sequence; n=1; Vitis vinifera|Rep: Chromosome chr6 scaffold_3, whole genome shotgun sequence - Vitis vinifera (Grape), partial (34%)	0	6.09593e-08	0	0	0	0	8.15217e-08	1.40798e-07	5.18922e-08	0	0	0	0	2.30971	0	0	0	0	0	-0.432955	0	0	0	0
TC415530	TC415530 weakly similar to UniRef100_UPI000069DCEB Cluster: Collagen alpha-1(VI) chain precursor.; n=1; Xenopus tropicalis|Rep: Collagen alpha-1(VI) chain precursor. - Xenopus tropicalis, partial (5%)	7.88327e-08	1.21919e-07	3.78187e-07	0	0	1.6477e-07	8.15217e-08	7.03992e-08	1.55677e-07	0	1.35625e-07	5.35221e-07	1.03411	0.577427	0.41164	0	0	3.24829	-0.967014	-1.73182	-2.42931	0	0	-0.307854
GO477618	GO477618 homologue to UniRef100_Q6QM24 Cluster: Zexanthin epoxidase; n=1; Citrus sinensis|Rep: Zexanthin epoxidase - Citrus sinensis (Sweet orange), partial (33%)	2.36498e-07	6.09593e-08	0	0	0	0	8.15217e-08	7.03992e-08	0	0	0	0	0.344704	1.15485	0	0	0	0	-2.90104	-0.86591	0	0	0	0
comp22198_c0_seq1	comp22198_c0_seq1 len=238 path=[0:0-237] : tr|B9H8U4|B9H8U4_POPTR Predicted protein OS=Populus trichocarpa GN=POPTRDRAFT_819004 PE=4 SV=1 e-value: 1e-35 blast score: 149	3.15331e-07	6.70553e-07	0	0	0	0	2.44565e-07	3.51996e-07	0	0	0	0	0.775583	0.524934	0	0	0	0	-1.28935	-1.905	0	0	0	0
comp8219_c0_seq1	comp8219_c0_seq1 len=565 path=[0:0-564]	5.99128e-06	6.76649e-06	4.16005e-06	4.4309e-06	5.649e-06	5.93173e-06	4.4837e-06	4.50555e-06	4.87787e-06	5.30055e-06	4.74687e-06	5.48602e-06	0.74837	0.665862	1.17255	1.19627	0.840303	0.92486	-1.33624	-1.50181	-0.852842	-0.835933	-1.19005	-1.08124
comp2607_c0_seq1	comp2607_c0_seq1 len=448 path=[0:0-447] : tr|F2D8Q4|F2D8Q4_HORVD Predicted protein OS=Hordeum vulgare var. distichum PE=2 SV=1 e-value: 2e-24 blast score: 112	1.86833e-05	1.86536e-05	1.53166e-05	1.80601e-05	2.15689e-05	2.27383e-05	6.60326e-06	8.1663e-06	1.57233e-05	1.42151e-05	1.93944e-05	1.48524e-05	0.35343	0.437788	1.02656	0.787099	0.899181	0.653188	-2.82941	-2.28421	-0.974128	-1.27049	-1.11212	-1.53095
TC453957	TC453957 similar to UniRef100_A8HZJ8 Cluster: SWI/SNF chromatin remodeling complex protein; n=1; Chlamydomonas reinhardtii|Rep: SWI/SNF chromatin remodeling complex protein - Chlamydomonas reinhardtii, partial (3%)	2.36498e-07	0	0	5.60874e-08	5.70606e-08	5.49234e-08	0	0	0	1.20467e-07	6.78124e-08	6.69027e-08	0	0	0	2.14785	1.18843	1.21811	0	0	0	-0.465583	-0.841447	-0.820945
comp17137_c0_seq1	comp17137_c0_seq1 len=469 path=[0:0-468]	2.04965e-06	2.43837e-06	3.78187e-06	4.15047e-06	3.53776e-06	3.07571e-06	2.85326e-06	3.30876e-06	4.35895e-06	3.37308e-06	2.7125e-06	3.88035e-06	1.39207	1.35695	1.15259	0.812699	0.766728	1.26161	-0.718353	-0.736945	-0.86761	-1.23047	-1.30424	-0.792637
comp12934_c0_seq1	comp12934_c0_seq1 len=539 path=[0:0-538]	2.44381e-06	2.98701e-06	3.21459e-06	2.63611e-06	3.25245e-06	3.57002e-06	1.54891e-06	1.33758e-06	2.75029e-06	1.80701e-06	1.76312e-06	2.67611e-06	0.63381	0.447801	0.855565	0.685483	0.54209	0.749605	-1.57776	-2.23314	-1.16882	-1.45883	-1.84471	-1.33404
comp22474_c0_seq1	comp22474_c0_seq1 len=251 path=[0:0-250]	5.51829e-07	6.09593e-07	1.89093e-07	3.36524e-07	1.14121e-07	6.04157e-07	4.8913e-07	3.51996e-07	6.74599e-07	2.40934e-07	3.39062e-07	2.67611e-07	0.886381	0.577427	3.56755	0.715949	2.97107	0.442948	-1.12818	-1.73182	-0.280305	-1.39675	-0.336579	-2.2576
TC404261	TC404261 homologue to UniRef100_Q41421 Cluster: Chlorophyll a/b binding protein; n=1; Solanum tuberosum|Rep: Chlorophyll a/b binding protein - Solanum tuberosum (Potato), partial (81%) #or# TC410559 homologue to UniRef100_P06671 Cluster: Chlorophyll a-b binding protein, chloroplast precursor; n=1; Zea mays|Rep: Chlorophyll a-b binding protein, chloroplast precursor - Zea mays (Maize), partial (76…	7.88327e-08	0	0	0	5.70606e-08	5.49234e-08	1.63043e-07	7.03992e-08	5.18922e-08	0	6.78124e-08	6.69027e-08	2.06822	0	0	0	1.18843	1.21811	-0.483507	0	0	0	-0.841447	-0.820945
TC370071	TC370071 UniRef100_Q9ARG8 Cluster: Sucrose-6F-phosphate phosphohydrolase SPP3; n=1; Triticum aestivum|Rep: Sucrose-6F-phosphate phosphohydrolase SPP3 - Triticum aestivum (Wheat), complete	7.88327e-08	1.21919e-07	0	0	0	2.74617e-07	2.44565e-07	1.40798e-07	0	0	2.03437e-07	6.69027e-08	3.10233	1.15485	0	0	0	0.243622	-0.322338	-0.86591	0	0	0	-4.10473
CD873401	CD873401	2.36498e-07	1.82878e-07	1.32365e-06	5.04787e-07	9.7003e-07	1.04354e-06	3.26087e-07	0	0	0	0	0	1.37882	0	0	0	0	0	-0.72526	0	0	0	0	0
TC400558	TC400558	7.88327e-08	0	0	4.48699e-07	1.14121e-07	1.09847e-07	0	0	1.55677e-07	1.20467e-07	0	6.69027e-08	0	0	0	0.268481	0	0.609054	0	0	0	-3.72466	0	-1.64189
comp16458_c0_seq1	comp16458_c0_seq1 len=402 path=[0:0-401]	1.41899e-06	1.15823e-06	7.56373e-07	1.23392e-06	3.99424e-07	1.42801e-06	1.63043e-06	1.83038e-06	1.66055e-06	1.44561e-06	8.81562e-07	1.33805e-06	1.14901	1.58033	2.19541	1.17155	2.20708	0.937006	-0.870313	-0.63278	-0.455495	-0.853568	-0.453087	-1.06723
CJ532910	CJ532910 similar to UniRef100_A7NT63 Cluster: Chromosome chr18 scaffold_1, whole genome shotgun sequence; n=1; Vitis vinifera|Rep: Chromosome chr18 scaffold_1, whole genome shotgun sequence - Vitis vinifera (Grape), partial (25%)	0	0	0	5.60874e-08	5.70606e-08	5.49234e-08	8.15217e-08	1.40798e-07	5.18922e-08	0	6.78124e-08	0	0	0	0	0	1.18843	0	0	0	0	0	-0.841447	0
TC373621	TC373621 similar to UniRef100_Q6SYB1 Cluster: GTP-binding protein TypA; n=1; Trifolium pratense|Rep: GTP-binding protein TypA - Trifolium pratense (Red clover), partial (50%)	7.88327e-07	1.34111e-06	9.45466e-07	1.06566e-06	1.36945e-06	8.23851e-07	8.15217e-07	1.33758e-06	1.3492e-06	7.22803e-07	4.74687e-07	1.07044e-06	1.03411	0.997374	1.42702	0.678267	0.346625	1.29932	-0.967014	-1.00263	-0.700762	-1.47435	-2.88496	-0.769636
comp8359_c0_seq1	comp8359_c0_seq1 len=354 path=[0:0-353]	2.2152e-05	2.06652e-05	4.12223e-05	3.53911e-05	2.99568e-05	3.3668e-05	2.77989e-05	3.16796e-05	2.84888e-05	3.07191e-05	2.57687e-05	2.73632e-05	1.25492	1.53299	0.691102	0.867989	0.860196	0.812734	-0.796865	-0.652319	-1.44696	-1.15209	-1.16253	-1.23041
TC421138	TC421138	1.57665e-07	6.09593e-08	0	1.68262e-07	0	5.49234e-08	8.15217e-08	7.03992e-08	1.55677e-07	1.20467e-07	6.78124e-08	6.69027e-08	0.517056	1.15485	0	0.715949	0	1.21811	-1.93403	-0.86591	0	-1.39675	0	-0.820945
comp18807_c0_seq1	comp18807_c0_seq1 len=280 path=[0:0-279]	1.26132e-06	6.70553e-07	0	0	0	0	5.70652e-07	4.92794e-07	0	1.20467e-07	0	0	0.452424	0.734907	0	0	0	0	-2.21032	-1.36072	0	0	0	0
CA693712	CA693712 homologue to UniRef100_P49170 Cluster: Chloroplast 30S ribosomal protein S18; n=1; Secale cereale|Rep: Chloroplast 30S ribosomal protein S18 - Secale cereale (Rye), partial (54%)	1.57665e-07	6.09593e-08	0	5.60874e-08	0	5.49234e-08	1.63043e-07	2.11197e-07	1.03784e-07	1.20467e-07	1.35625e-07	0	1.03411	3.46456	0	2.14785	0	0	-0.967014	-0.288637	0	-0.465583	0	0
TC13005	TC13005 similar to UniRef100_A7Q5A4 Cluster: Chromosome undetermined scaffold_52, whole genome shotgun sequence; n=1; Vitis vinifera|Rep: Chromosome undetermined scaffold_52, whole genome shotgun sequence - Vitis vinifera (Grape), partial (44%)	1.57665e-07	3.65756e-07	0	0	0	0	1.63043e-07	4.92794e-07	0	0	0	0	1.03411	1.34733	0	0	0	0	-0.967014	-0.742209	0	0	0	0
BJ263821	BJ263821 weakly similar to UniRef100_Q0JMJ0 Cluster: Os01g0498200 protein; n=2; Oryza sativa Japonica Group|Rep: Os01g0498200 protein - Oryza sativa subsp. japonica (Rice), partial (43%)	7.88327e-08	0	0	0	1.14121e-07	5.49234e-08	3.26087e-07	0	1.55677e-07	1.20467e-07	6.78124e-08	6.69027e-08	4.13645	0	0	0	0.594214	1.21811	-0.241753	0	0	0	-1.68289	-0.820945
comp26444_c0_seq1	comp26444_c0_seq1 len=242 path=[0:0-241]	2.83798e-06	3.16989e-06	6.42917e-06	5.3283e-06	4.45073e-06	5.54726e-06	5.05435e-06	6.05433e-06	4.92976e-06	5.78242e-06	3.18719e-06	4.88389e-06	1.78097	1.90995	0.76678	1.08523	0.716104	0.880415	-0.561492	-0.523573	-1.30415	-0.921466	-1.39644	-1.13583
comp5591_c0_seq1	comp5591_c0_seq1 len=501 path=[0:0-500]	3.8628e-06	4.99866e-06	6.61826e-06	6.2257e-06	6.73315e-06	5.21772e-06	3.34239e-06	4.43515e-06	5.08544e-06	3.61401e-06	5.89968e-06	6.08814e-06	0.865277	0.887266	0.768394	0.580499	0.876214	1.16682	-1.1557	-1.12706	-1.30141	-1.72266	-1.14127	-0.857031
comp18576_c0_seq1	comp18576_c0_seq1 len=272 path=[0:0-271]	1.02482e-06	1.6459e-06	3.78187e-07	1.62653e-06	1.14121e-06	2.52648e-06	1.38587e-06	1.47838e-06	1.55677e-06	1.56607e-06	2.44125e-06	1.47186e-06	1.3523	0.89822	4.1164	0.962828	2.13917	0.582573	-0.739481	-1.11331	-0.242931	-1.03861	-0.467471	-1.71652
comp21685_c0_seq1	comp21685_c0_seq1 len=280 path=[0:0-279]	7.09494e-07	1.76782e-06	1.70184e-06	2.01915e-06	2.33948e-06	1.59278e-06	1.46739e-06	1.83038e-06	2.75029e-06	2.40934e-06	2.44125e-06	2.00708e-06	2.06822	1.03539	1.61607	1.19325	1.0435	1.26011	-0.483507	-0.965823	-0.618786	-0.838049	-0.958315	-0.79358
comp34662_c0_seq1	comp34662_c0_seq1 len=153 path=[0:0-152]	1.57665e-07	1.21919e-07	1.89093e-07	5.60874e-08	2.28242e-07	5.49234e-08	8.15217e-08	0	1.55677e-07	0	2.7125e-07	1.33805e-07	0.517056	0	0.82328	0	1.18843	2.43622	-1.93403	0	-1.21465	0	-0.841447	-0.410473
comp28387_c0_seq1	comp28387_c0_seq1 len=295 path=[0:0-294]	4.72996e-07	3.65756e-07	2.45821e-06	1.45827e-06	2.33948e-06	1.15339e-06	1.36141e-05	5.49113e-06	6.22707e-07	9.63737e-07	6.78124e-07	1.60566e-06	28.7828	15.0131	0.253317	0.660876	0.289861	1.39212	-0.034743	-0.0666085	-3.94763	-1.51314	-3.44993	-0.718327
comp8232_c0_seq1	comp8232_c0_seq1 len=312 path=[0:0-311]	1.26132e-05	1.10336e-05	1.64511e-05	1.35171e-05	1.19827e-05	1.13691e-05	1.40217e-05	1.16863e-05	1.4426e-05	1.49379e-05	1.01719e-05	1.49193e-05	1.11167	1.05915	0.876903	1.10512	0.848877	1.31226	-0.899548	-0.944155	-1.14038	-0.904883	-1.17803	-0.762043
TC443814	TC443814 UniRef100_P12073 Cluster: DNA-directed RNA polymerase subunit alpha; n=9; Triticeae|Rep: DNA-directed RNA polymerase subunit alpha - Triticum aestivum (Wheat), complete	3.15331e-07	6.09593e-07	1.89093e-07	2.80437e-07	5.13545e-07	3.2954e-07	3.26087e-07	2.11197e-07	4.15138e-07	1.20467e-07	4.06875e-07	2.00708e-07	1.03411	0.346456	2.19541	0.429569	0.792286	0.609054	-0.967014	-2.88637	-0.455495	-2.32791	-1.26217	-1.64189
TC444785	TC444785	5.51829e-07	1.82878e-07	1.51275e-06	1.85088e-06	1.5977e-06	7.14004e-07	2.69022e-06	1.54878e-06	5.70814e-07	7.22803e-07	3.39062e-07	1.40496e-06	4.8751	8.46893	0.377337	0.390517	0.212219	1.96771	-0.205124	-0.118079	-2.65015	-2.5607	-4.71211	-0.508204
comp5642_c0_seq1	comp5642_c0_seq1 len=431 path=[0:0-430] : tr|Q5JJU5|Q5JJU5_ORYSJ 5-oxoprolinase-like OS=Oryza sativa subsp. japonica GN=P0458E05.23-2 PE=4 SV=1 e-value: 2e-30 blast score: 131	6.77961e-06	8.47335e-06	1.04001e-05	9.47877e-06	1.01568e-05	9.06236e-06	1.19837e-05	1.02079e-05	1.16239e-05	8.91456e-06	7.12031e-06	1.20425e-05	1.76761	1.2047	1.11766	0.940477	0.701039	1.32885	-0.565736	-0.830079	-0.894723	-1.06329	-1.42645	-0.752533
comp8466_c0_seq1	comp8466_c0_seq1 len=287 path=[0:0-182 183:183-286] : tr|F2EB28|F2EB28_HORVD Predicted protein OS=Hordeum vulgare var. distichum PE=4 SV=1 e-value: 5e-22 blast score: 103	1.73432e-06	1.76782e-06	1.51275e-06	2.74828e-06	2.91009e-06	2.19694e-06	2.20109e-06	2.53437e-06	1.3492e-06	1.56607e-06	1.22062e-06	2.5423e-06	1.26914	1.43361	0.891886	0.569837	0.419445	1.1572	-0.787937	-0.697539	-1.12122	-1.75489	-2.3841	-0.864153
TC414224	TC414224 similar to UniRef100_A7P3H1 Cluster: Chromosome chr1 scaffold_5, whole genome shotgun sequence; n=1; Vitis vinifera|Rep: Chromosome chr1 scaffold_5, whole genome shotgun sequence - Vitis vinifera (Grape), partial (43%)	1.65549e-06	2.31645e-06	1.89093e-07	5.60874e-07	4.56485e-07	7.68928e-07	5.70652e-07	0	0	0	0	0	0.344704	0	0	0	0	0	-2.90104	0	0	0	0	0
TC251677	TC251677 UniRef100_A1E9N6 Cluster: Ribosomal protein S15; n=1; Hordeum vulgare|Rep: Ribosomal protein S15 - Hordeum vulgare (Barley), complete	2.52265e-06	3.04797e-06	2.45821e-06	2.41176e-06	2.39655e-06	4.06433e-06	2.28261e-06	2.53437e-06	3.73624e-06	3.85495e-06	4.34e-06	6.02124e-06	0.904847	0.831495	1.5199	1.5984	1.81094	1.48148	-1.10516	-1.20265	-0.657938	-0.625627	-0.5522	-0.674999
comp10900_c0_seq1	comp10900_c0_seq1 len=383 path=[0:0-382]	3.70513e-06	5.5473e-06	5.10552e-06	6.61831e-06	6.79021e-06	5.05295e-06	4.97283e-06	5.35034e-06	6.79788e-06	5.30055e-06	5.425e-06	5.88743e-06	1.34214	0.964494	1.33148	0.800892	0.798943	1.16515	-0.745076	-1.03681	-0.751046	-1.24861	-1.25165	-0.858261
CA592766	CA592766 homologue to UniRef100_Q9FRZ2 Cluster: Ribulose bisphosphate carboxylase small chain; n=1; Triticum aestivum|Rep: Ribulose bisphosphate carboxylase small chain - Triticum aestivum (Wheat), partial (75%) #or# TC266127 homologue to UniRef100_Q9FRZ2 Cluster: Ribulose bisphosphate carboxylase small chain; n=1; Triticum aestivum|Rep: Ribulose bisphosphate carboxylase small chain - Triticum ae…	3.46864e-06	4.02332e-06	9.45466e-07	1.06566e-06	1.36945e-06	1.26324e-06	2.6087e-06	3.16796e-06	2.6465e-06	1.92747e-06	2.44125e-06	2.00708e-06	0.752081	0.787401	2.79915	1.80871	1.78264	1.58884	-1.32964	-1.27	-0.357251	-0.552879	-0.560965	-0.629391
CA667122	CA667122 homologue to UniRef100_Q95H51 Cluster: Chloroplast 50S ribosomal protein L14; n=1; Triticum aestivum|Rep: Chloroplast 50S ribosomal protein L14 - Triticum aestivum (Wheat), partial (37%) #or# CA671303 UniRef100_Q95H51 Cluster: Chloroplast 50S ribosomal protein L14; n=1; Triticum aestivum|Rep: Chloroplast 50S ribosomal protein L14 - Triticum aestivum (Wheat), partial (33%)	3.94163e-07	2.43837e-07	1.89093e-07	2.2435e-07	5.70606e-08	5.49234e-08	2.44565e-07	2.81597e-07	3.63246e-07	6.02335e-07	3.39062e-07	2.00708e-07	0.620467	1.15485	1.92099	2.68481	5.94214	3.65432	-1.61169	-0.86591	-0.520566	-0.372466	-0.168289	-0.273648
comp26059_c0_seq1	comp26059_c0_seq1 len=233 path=[0:0-232]	1.57665e-06	9.1439e-07	1.13456e-06	3.30916e-06	2.28242e-06	1.6477e-06	3.58696e-06	1.97118e-06	2.23137e-06	2.89121e-06	1.15281e-06	2.00708e-06	2.27504	2.15573	1.96672	0.8737	0.505082	1.21811	-0.439552	-0.46388	-0.50846	-1.14456	-1.97988	-0.820945
comp4437_c0_seq1	comp4437_c0_seq1 len=586 path=[506:0-274 128:275-303 462:304-347 200:348-585] : tr|C5XXS3|C5XXS3_SORBI Putative uncharacterized protein Sb04g026380 OS=Sorghum bicolor GN=Sb04g026380 PE=4 SV=1 e-value: 2e-06 blast score: 53.5	1.15096e-05	1.03021e-05	1.47493e-05	1.20027e-05	1.3181e-05	1.16438e-05	1.36957e-05	1.31646e-05	1.30768e-05	1.0842e-05	1.02397e-05	1.32467e-05	1.18994	1.27786	0.886609	0.9033	0.776851	1.13767	-0.840381	-0.78256	-1.12789	-1.10705	-1.28725	-0.878992
comp3507_c0_seq1	comp3507_c0_seq1 len=539 path=[0:0-538] : tr|Q7XA15|Q7XA15_WHEAT Isoamylase wDBE-D1 OS=Triticum aestivum PE=2 SV=1 e-value: 7e-08 blast score: 57.8	0.000121402	0.000115152	7.299e-05	7.31941e-05	9.36935e-05	0.00010787	9.48098e-05	0.000102924	0.000107002	8.63749e-05	0.000123419	0.000111928	0.780955	0.893805	1.46598	1.18008	1.31726	1.03762	-1.28048	-1.11881	-0.682138	-0.847399	-0.759152	-0.96374
TC371275	TC371275 homologue to UniRef100_O24401 Cluster: Chlorophyll a/b-binding protein WCAB precursor; n=1; Triticum aestivum|Rep: Chlorophyll a/b-binding protein WCAB precursor - Triticum aestivum (Wheat), partial (94%) #or# TC412259 homologue to UniRef100_O24401 Cluster: Chlorophyll a/b-binding protein WCAB precursor; n=1; Triticum aestivum|Rep: Chlorophyll a/b-binding protein WCAB precursor - Triticu…	0	0	1.89093e-07	0	0	0	0	0	5.18922e-08	1.20467e-07	0	0	0	0	0.274427	0	0	0	0	0	-3.64396	0	0	0
comp4537_c0_seq1	comp4537_c0_seq1 len=372 path=[0:0-371]	9.53875e-06	9.50966e-06	6.80736e-06	5.88918e-06	8.10261e-06	1.02707e-05	9.375e-06	8.4479e-06	9.39249e-06	4.21635e-06	7.18812e-06	6.55646e-06	0.982833	0.88835	1.37976	0.715949	0.887137	0.638367	-1.01747	-1.12568	-0.724766	-1.39675	-1.12722	-1.5665
comp287_c0_seq1	comp287_c0_seq1 len=988 path=[0:0-987]	0.000243041	0.000281754	0.000201384	0.000260021	0.000239369	0.000224802	5.51087e-05	8.2367e-06	5.13733e-06	4.21635e-06	3.93312e-06	4.21487e-06	0.226746	0.0292337	0.0255101	0.0162154	0.0164312	0.0187493	-4.41021	-34.2071	-39.2002	-61.6698	-60.8599	-53.3354
comp5102_c0_seq1	comp5102_c0_seq1 len=457 path=[0:0-456]	9.53875e-06	1.10946e-05	6.61826e-06	8.0205e-06	9.415e-06	7.35974e-06	1.18207e-05	9.64468e-06	5.76004e-06	6.50522e-06	6.30656e-06	7.15858e-06	1.23922	0.869314	0.870324	0.811075	0.669841	0.972668	-0.806956	-1.15033	-1.149	-1.23293	-1.49289	-1.0281
CJ559124	CJ559124 homologue to UniRef100_A7QQL7 Cluster: Chromosome undetermined scaffold_143, whole genome shotgun sequence; n=1; Vitis vinifera|Rep: Chromosome undetermined scaffold_143, whole genome shotgun sequence - Vitis vinifera (Grape), partial (49%)	7.88327e-08	0	0	1.68262e-07	2.28242e-07	5.49234e-08	1.63043e-07	2.81597e-07	2.59461e-07	1.20467e-07	0	4.68319e-07	2.06822	0	0	0.715949	0	8.52676	-0.483507	0	0	-1.39675	0	-0.117278
BF475163	BF475163 similar to UniRef100_Q10PZ6 Cluster: Expressed protein; n=1; Oryza sativa Japonica Group|Rep: Expressed protein - Oryza sativa subsp. japonica (Rice), partial (3%)	0	6.09593e-08	0	0	5.70606e-08	0	0	7.03992e-08	5.18922e-08	0	0	0	0	1.15485	0	0	0	0	0	-0.86591	0	0	0	0
TC369041	TC369041 similar to UniRef100_Q5W676 Cluster: Hexokinase-5; n=2; Oryza sativa Japonica Group|Rep: Hexokinase-5 - Oryza sativa subsp. japonica (Rice), partial (46%) #or# TC371210 similar to UniRef100_Q5W676 Cluster: Hexokinase-5; n=2; Oryza sativa Japonica Group|Rep: Hexokinase-5 - Oryza sativa subsp. japonica (Rice), partial (28%) #or# TC373010 homologue to UniRef100_Q6QN86 Cluster: Beta-expansin…	1.57665e-07	0	7.56373e-07	6.16961e-07	3.42364e-07	4.94311e-07	8.96739e-07	7.03992e-08	5.18922e-07	6.02335e-07	1.35625e-07	3.34513e-07	5.68761	0	0.686067	0.976294	0.396143	0.676727	-0.175821	0	-1.45758	-1.02428	-2.52434	-1.4777
TC378052	TC378052	0	0	1.89093e-07	5.60874e-08	5.70606e-08	0	0	0	0	1.20467e-07	0	0	0	0	0	2.14785	0	0	0	0	0	-0.465583	0	0
comp10327_c0_seq1	comp10327_c0_seq1 len=245 path=[0:0-244]	3.15331e-06	3.84044e-06	3.02549e-06	5.04787e-06	4.33661e-06	5.21772e-06	4.23913e-06	4.85754e-06	3.37299e-06	3.85495e-06	2.78031e-06	4.68319e-06	1.34434	1.26484	1.11486	0.763679	0.641126	0.897553	-0.743857	-0.790613	-0.896975	-1.30945	-1.55976	-1.11414
TC381791	TC381791	1.57665e-06	1.15823e-06	2.45821e-06	3.02872e-06	2.45361e-06	1.59278e-06	1.95652e-06	1.12639e-06	1.50487e-06	2.40934e-06	1.15281e-06	2.74301e-06	1.24093	0.972509	0.612182	0.795499	0.469844	1.72215	-0.805845	-1.02827	-1.6335	-1.25707	-2.12837	-0.580669
comp9694_c0_seq1	comp9694_c0_seq1 len=449 path=[0:0-448] : tr|F2E750|F2E750_HORVD Predicted protein OS=Hordeum vulgare var. distichum PE=2 SV=1 e-value: 2e-11 blast score: 68.9	5.75478e-06	3.96236e-06	4.72733e-06	1.18905e-05	1.30669e-05	7.19497e-06	5.13587e-06	3.94235e-06	7.26491e-07	1.56607e-06	4.74687e-07	1.67257e-06	0.892452	0.994952	0.153679	0.131708	0.0363275	0.232463	-1.12051	-1.00507	-6.50707	-7.59258	-27.5274	-4.30175
comp3242_c0_seq1	comp3242_c0_seq1 len=287 path=[0:0-286]	1.29286e-05	8.04663e-06	3.27131e-05	3.44377e-05	1.89441e-05	1.69713e-05	6.3913e-05	4.16763e-05	1.3492e-05	2.46958e-05	8.47656e-06	1.94687e-05	4.94356	5.17935	0.412433	0.717115	0.44745	1.14715	-0.202284	-0.193075	-2.42464	-1.39448	-2.23488	-0.871725
comp11551_c0_seq1	comp11551_c0_seq1 len=423 path=[0:0-422]	2.28615e-06	2.19454e-06	3.02549e-06	4.37482e-06	3.65188e-06	4.11926e-06	3.0163e-06	1.97118e-06	4.25516e-06	3.37308e-06	3.39062e-06	3.47894e-06	1.31938	0.89822	1.40644	0.771022	0.92846	0.844555	-0.75793	-1.11331	-0.711017	-1.29698	-1.07705	-1.18406
comp12551_c0_seq1	comp12551_c0_seq1 len=400 path=[0:0-399] : tr|F2E8H5|F2E8H5_HORVD Predicted protein OS=Hordeum vulgare var. distichum PE=2 SV=1 e-value: 5e-06 blast score: 50.8	2.36498e-06	2.62125e-06	1.70184e-06	2.46785e-06	1.36945e-06	2.5814e-06	2.85326e-06	2.11197e-06	2.07569e-06	1.92747e-06	1.76312e-06	1.94018e-06	1.20646	0.805712	1.21967	0.781035	1.28746	0.751599	-0.828869	-1.24114	-0.819891	-1.28035	-0.776721	-1.3305
comp17822_c0_seq1	comp17822_c0_seq1 len=291 path=[0:0-290] : tr|C5YQK5|C5YQK5_SORBI Putative uncharacterized protein Sb08g001265 (Fragment) OS=Sorghum bicolor GN=Sb08g001265 PE=3 SV=1 e-value: 1e-13 blast score: 75.9	7.88327e-07	1.28015e-06	1.89093e-07	7.85224e-07	8.55909e-07	1.31816e-06	8.15217e-07	2.11197e-06	2.49083e-06	1.56607e-06	3.52625e-06	2.07398e-06	1.03411	1.64979	13.1725	1.99443	4.11989	1.57339	-0.967014	-0.606137	-0.0759159	-0.501397	-0.242725	-0.63557
comp24424_c0_seq1	comp24424_c0_seq1 len=270 path=[0:0-269]	7.09494e-07	1.82878e-07	0	0	0	0	4.07609e-07	2.11197e-07	0	0	0	0	0.574506	1.15485	0	0	0	0	-1.74063	-0.86591	0	0	0	0
comp20552_c0_seq1	comp20552_c0_seq1 len=452 path=[0:0-451] : tr|B9F069|B9F069_ORYSJ Putative uncharacterized protein OS=Oryza sativa subsp. japonica GN=OsJ_06871 PE=4 SV=1 e-value: 1e-05 blast score: 49.3	1.34016e-06	1.09727e-06	2.08003e-06	2.58002e-06	1.82594e-06	1.92232e-06	1.875e-06	1.47838e-06	2.75029e-06	2.04794e-06	1.42406e-06	2.4085e-06	1.39909	1.34733	1.32224	0.793769	0.779906	1.25291	-0.714749	-0.742209	-0.756294	-1.25981	-1.28221	-0.798141
comp33660_c0_seq1	comp33660_c0_seq1 len=197 path=[0:0-196] : tr|B3SND7|B3SND7_GOSHI RNA-dependent RNA polymerase OS=Gossypium hirsutum PE=4 SV=1 e-value: 2e-05 blast score: 48.9	1.57665e-07	2.43837e-07	0	0	0	0	0	2.81597e-07	0	0	0	0	0	1.15485	0	0	0	0	0	-0.86591	0	0	0	0
TC243441	TC243441 UniRef100_Q43480 Cluster: Gamma-TIP-like protein; n=1; Hordeum vulgare|Rep: Gamma-TIP-like protein - Hordeum vulgare (Barley), partial (58%) #or# TC253069 UniRef100_Q43480 Cluster: Gamma-TIP-like protein; n=1; Hordeum vulgare|Rep: Gamma-TIP-like protein - Hordeum vulgare (Barley), partial (48%) #or# TC268416 UniRef100_Q43480 Cluster: Gamma-TIP-like protein; n=1; Hordeum vulgare|Rep: Gamm…	2.36498e-07	3.04797e-07	0	1.68262e-07	0	5.49234e-08	8.15217e-08	7.03992e-08	1.03784e-07	2.40934e-07	1.35625e-07	0	0.344704	0.230971	0	1.4319	0	0	-2.90104	-4.32955	0	-0.698374	0	0
TC407262	TC407262 weakly similar to UniRef100_Q2IIH7 Cluster: PE-PGRS family protein; n=1; Anaeromyxobacter dehalogenans 2CP-C|Rep: PE-PGRS family protein - Anaeromyxobacter dehalogenans (strain 2CP-C), partial (5%)	7.09494e-07	6.09593e-07	1.32365e-06	9.53486e-07	4.56485e-07	6.59081e-07	5.70652e-07	4.92794e-07	7.78383e-07	9.63737e-07	6.78124e-07	6.02124e-07	0.804309	0.808398	0.588057	1.01075	1.48554	0.913581	-1.2433	-1.23701	-1.70052	-0.989363	-0.673158	-1.09459
comp15176_c0_seq1	comp15176_c0_seq1 len=461 path=[0:0-460] : tr|F2CZT0|F2CZT0_HORVD Predicted protein OS=Hordeum vulgare var. distichum PE=2 SV=1 e-value: 7e-12 blast score: 70.5	1.81315e-06	1.70686e-06	3.40368e-06	3.58959e-06	4.10836e-06	2.5814e-06	2.36413e-06	1.83038e-06	1.71244e-06	6.02335e-06	2.57687e-06	3.54584e-06	1.30388	1.07236	0.503115	1.678	0.627226	1.37361	-0.766942	-0.932518	-1.98762	-0.595946	-1.59432	-0.728008
comp40617_c0_seq1	comp40617_c0_seq1 len=273 path=[0:0-272] : tr|F2CXF0|F2CXF0_HORVD Predicted protein OS=Hordeum vulgare var. distichum PE=4 SV=1 e-value: 1e-06 blast score: 52.8	1.57665e-07	1.82878e-07	3.78187e-07	1.73871e-06	2.28242e-07	7.68928e-07	1.79348e-06	1.40798e-06	6.22707e-07	2.16841e-06	0	4.01416e-07	11.3752	7.69903	1.64656	1.24714	0	0.522046	-0.0879104	-0.129886	-0.607327	-0.801837	0	-1.91554
comp4930_c0_seq1	comp4930_c0_seq1 len=439 path=[0:0-438] : tr|F2CQW1|F2CQW1_HORVD Predicted protein OS=Hordeum vulgare var. distichum PE=2 SV=1 e-value: 9e-21 blast score: 99.8	1.09577e-05	1.2009e-05	7.37464e-06	6.00135e-06	7.532e-06	1.18635e-05	1.00272e-05	9.99668e-06	9.3406e-06	8.67363e-06	1.24775e-05	1.25108e-05	0.915077	0.832433	1.26658	1.44528	1.6566	1.05457	-1.0928	-1.2013	-0.789525	-0.691908	-0.603647	-0.948258
comp21143_c0_seq1	comp21143_c0_seq1 len=370 path=[0:0-369] : tr|F2DST8|F2DST8_HORVD Predicted protein OS=Hordeum vulgare var. distichum PE=2 SV=1 e-value: 5e-19 blast score: 94.0	2.22308e-05	1.6459e-05	4.97315e-05	7.8298e-05	2.92721e-05	4.76735e-05	5.72283e-05	5.76569e-05	4.21884e-05	6.95095e-05	1.62072e-05	3.5057e-05	2.57428	3.50306	0.848323	0.887756	0.553673	0.735356	-0.388459	-0.285465	-1.1788	-1.12644	-1.80612	-1.35989
comp17856_c0_seq1	comp17856_c0_seq1 len=263 path=[0:0-262] : tr|A2Y5Z6|A2Y5Z6_ORYSI Putative uncharacterized protein OS=Oryza sativa subsp. indica GN=OsI_20417 PE=3 SV=1 e-value: 5e-09 blast score: 60.8	3.94163e-07	1.21919e-06	0	0	0	0	1.30435e-06	1.40798e-06	5.18922e-08	0	0	0	3.30916	1.15485	0	0	0	0	-0.302192	-0.86591	0	0	0	0
comp871_c1_seq1	comp871_c1_seq1 len=269 path=[156:0-268]	5.06106e-05	5.66312e-05	2.60949e-05	6.08548e-05	5.10692e-05	6.90387e-05	2.8125e-05	1.93598e-05	1.73839e-05	1.80701e-05	2.2039e-05	2.16096e-05	0.555714	0.341857	0.666181	0.296937	0.431552	0.313006	-1.79949	-2.9252	-1.50109	-3.36771	-2.31722	-3.19482
TC239457	TC239457 similar to UniRef100_A7PV50 Cluster: Chromosome chr4 scaffold_32, whole genome shotgun sequence; n=1; Vitis vinifera|Rep: Chromosome chr4 scaffold_32, whole genome shotgun sequence - Vitis vinifera (Grape), partial (72%) #or# TC275273 similar to UniRef100_A7PV50 Cluster: Chromosome chr4 scaffold_32, whole genome shotgun sequence; n=1; Vitis vinifera|Rep: Chromosome chr4 scaffold_32, whol…	0.000105715	8.62575e-05	0.000180773	0.000149585	0.000170554	8.94153e-05	7.45924e-05	8.95477e-05	0.000116083	0.000156848	9.68362e-05	0.000117147	0.705602	1.03814	0.642147	1.04855	0.567774	1.31014	-1.41723	-0.963257	-1.55728	-0.953694	-1.76126	-0.763277
TC384606	TC384606 similar to UniRef100_Q6YZW0-2 Cluster: Isoform 2 of Q6YZW0 ; n=1; Oryza sativa Japonica Group|Rep: Isoform 2 of Q6YZW0 - Oryza sativa subsp. japonica (Rice), partial (39%)	1.57665e-07	1.82878e-07	1.89093e-07	5.60874e-08	4.56485e-07	1.09847e-07	8.15217e-08	0	1.03784e-07	0	0	0	0.517056	0	0.548853	0	0	0	-1.93403	0	-1.82198	0	0	0
TC370432	TC370432 similar to UniRef100_Q6IV73 Cluster: Protein phosphatase 2C; n=1; Zea mays|Rep: Protein phosphatase 2C - Zea mays (Maize), partial (64%)	2.91681e-06	3.47468e-06	3.40368e-06	2.69219e-06	3.4807e-06	2.47155e-06	5.21739e-06	4.36475e-06	2.80218e-06	5.18009e-06	1.35625e-06	2.20779e-06	1.78873	1.25616	0.82328	1.92411	0.389649	0.893279	-0.559055	-0.796079	-1.21465	-0.51972	-2.56641	-1.11947
comp38702_c0_seq1	comp38702_c0_seq1 len=366 path=[0:0-365]	3.94163e-07	1.82878e-07	0	5.60874e-08	2.85303e-07	1.09847e-07	0	2.81597e-07	2.59461e-07	1.20467e-07	3.39062e-07	4.01416e-07	0	1.53981	0	2.14785	1.18843	3.65432	0	-0.649432	0	-0.465583	-0.841447	-0.273648
TC384410	TC384410 similar to UniRef100_P37707 Cluster: B2 protein; n=1; Daucus carota|Rep: B2 protein - Daucus carota (Carrot), partial (71%) #or# TC422089 homologue to UniRef100_P37707 Cluster: B2 protein; n=1; Daucus carota|Rep: B2 protein - Daucus carota (Carrot), partial (31%)	1.02482e-06	1.40206e-06	3.59277e-06	2.13132e-06	2.62479e-06	1.81247e-06	3.75e-06	2.18237e-06	1.29731e-06	1.44561e-06	4.74687e-07	1.53876e-06	3.65916	1.55654	0.361088	0.678267	0.180848	0.848984	-0.273287	-0.642449	-2.76941	-1.47435	-5.52951	-1.17788
comp38198_c0_seq1	comp38198_c0_seq1 len=129 path=[0:0-128]	0	1.21919e-07	0	1.12175e-07	5.70606e-08	5.49234e-08	0	0	1.55677e-07	0	6.78124e-08	0	0	0	0	0	1.18843	0	0	0	0	0	-0.841447	0
TC369401	TC369401 similar to UniRef100_A9SGF1 Cluster: Predicted protein; n=1; Physcomitrella patens subsp. patens|Rep: Predicted protein - Physcomitrella patens subsp. patens, partial (59%) #or# TC369709 similar to UniRef100_A9SGF1 Cluster: Predicted protein; n=1; Physcomitrella patens subsp. patens|Rep: Predicted protein - Physcomitrella patens subsp. patens, partial (54%)	7.41027e-06	1.01802e-05	3.78187e-06	3.92612e-07	5.70606e-07	1.42801e-06	8.31522e-06	1.18975e-05	9.3406e-07	7.22803e-07	4.13656e-06	3.27823e-06	1.12212	1.16869	0.246984	1.84101	7.24941	2.29567	-0.89117	-0.855663	-4.04885	-0.54318	-0.137942	-0.435604
CA676857	CA676857	4.72996e-07	6.09593e-07	5.6728e-07	6.16961e-07	3.42364e-07	3.84464e-07	8.15217e-07	1.12639e-06	4.6703e-07	1.20467e-07	6.10312e-07	9.36637e-07	1.72352	1.84777	0.82328	0.195259	1.78264	2.43622	-0.580208	-0.541194	-1.21465	-5.12141	-0.560965	-0.410473
comp28620_c0_seq1	comp28620_c0_seq1 len=223 path=[0:0-222]	2.36498e-07	4.87675e-07	1.89093e-07	6.73049e-07	5.13545e-07	2.74617e-07	1.63043e-07	1.40798e-07	3.11353e-07	3.61401e-07	3.39062e-07	6.02124e-07	0.689408	0.288714	1.64656	0.536962	0.660238	2.19259	-1.45052	-3.46364	-0.607327	-1.86233	-1.51461	-0.456081
comp40942_c0_seq1	comp40942_c0_seq1 len=172 path=[0:0-171]	7.88327e-08	3.65756e-07	0	0	0	2.19694e-07	8.15217e-08	1.40798e-07	5.70814e-07	0	1.35625e-07	2.67611e-07	1.03411	0.384951	0	0	0	1.21811	-0.967014	-2.59773	0	0	0	-0.820945
CN184031	CN184031	3.15331e-07	6.70553e-07	0	0	0	0	3.26087e-07	7.74391e-07	0	0	0	0	1.03411	1.15485	0	0	0	0	-0.967014	-0.86591	0	0	0	0
comp21728_c0_seq1	comp21728_c0_seq1 len=201 path=[0:0-200]	5.51829e-07	4.87675e-07	1.89093e-06	6.73049e-07	5.13545e-07	4.94311e-07	4.07609e-07	2.81597e-07	5.18922e-07	4.81868e-07	3.39062e-07	8.02832e-07	0.738651	0.577427	0.274427	0.715949	0.660238	1.62414	-1.35382	-1.73182	-3.64396	-1.39675	-1.51461	-0.615709
comp36544_c0_seq1	comp36544_c0_seq1 len=261 path=[0:0-260]	0	2.43837e-07	0	3.36524e-07	3.99424e-07	2.19694e-07	2.44565e-07	1.40798e-07	1.55677e-07	1.20467e-07	2.03437e-07	1.33805e-07	0	0.577427	0	0.357974	0.509326	0.609054	0	-1.73182	0	-2.7935	-1.96338	-1.64189
comp19283_c0_seq1	comp19283_c0_seq1 len=307 path=[0:0-306] : tr|C6T600|C6T600_SOYBN Putative uncharacterized protein (Fragment) OS=Glycine max PE=2 SV=1 e-value: 2e-05 blast score: 48.5	1.02482e-06	6.70553e-07	1.89093e-07	8.97398e-07	1.25533e-06	7.14004e-07	1.05978e-06	9.85588e-07	1.3492e-06	3.61401e-07	1.89875e-06	1.20425e-06	1.03411	1.46981	7.13509	0.402721	1.51255	1.68661	-0.967014	-0.680358	-0.140152	-2.48311	-0.661137	-0.592905
TC261374	TC261374 homologue to UniRef100_A7QDZ9 Cluster: Chromosome chr4 scaffold_83, whole genome shotgun sequence; n=1; Vitis vinifera|Rep: Chromosome chr4 scaffold_83, whole genome shotgun sequence - Vitis vinifera (Grape), complete #or# TC267486 homologue to UniRef100_A2YQL4 Cluster: Fructokinase-2; n=2; Oryza sativa|Rep: Fructokinase-2 - Oryza sativa subsp. indica (Rice), partial (42%) #or# TC269176 …	7.88327e-07	9.1439e-07	3.78187e-07	7.85224e-07	3.99424e-07	8.78775e-07	8.15217e-07	6.33592e-07	8.30275e-07	2.40934e-07	6.78124e-07	9.36637e-07	1.03411	0.692913	2.19541	0.306835	1.69775	1.06584	-0.967014	-1.44318	-0.455495	-3.25908	-0.589013	-0.938223
comp3423_c0_seq1	comp3423_c0_seq1 len=335 path=[2:0-334] : tr|F2CXZ3|F2CXZ3_HORVD Predicted protein OS=Hordeum vulgare var. distichum PE=2 SV=1 e-value: 1e-05 blast score: 49.7	1.23767e-05	1.18871e-05	2.25021e-05	1.97428e-05	2.43078e-05	1.26324e-05	9.94565e-06	9.64468e-06	1.22985e-05	1.54198e-05	1.06466e-05	1.33805e-05	0.803577	0.811359	0.546547	0.781035	0.437989	1.05922	-1.24444	-1.2325	-1.82967	-1.28035	-2.28316	-0.944087
comp4863_c0_seq1	comp4863_c0_seq1 len=359 path=[0:0-358]	2.90104e-05	3.04797e-05	4.68951e-05	2.93337e-05	2.80168e-05	2.79011e-05	4.92391e-05	5.25882e-05	3.20175e-05	2.96349e-05	3.11259e-05	3.11097e-05	1.69729	1.72535	0.682747	1.01027	1.11097	1.115	-0.589174	-0.579592	-1.46467	-0.989836	-0.90011	-0.896861
CA659596	CA659596 similar to UniRef100_Q5DRI4 Cluster: Ribulose bisphosphate carboxylase large chain; n=1; Ladenbergia amazonensis|Rep: Ribulose bisphosphate carboxylase large chain - Ladenbergia amazonensis, partial (16%)	3.15331e-07	6.09593e-07	1.89093e-07	3.36524e-07	2.28242e-07	6.59081e-07	5.70652e-07	3.51996e-07	7.26491e-07	3.61401e-07	6.78124e-07	4.68319e-07	1.80969	0.577427	3.84197	1.07392	2.97107	0.710563	-0.552579	-1.73182	-0.260283	-0.931165	-0.336579	-1.40733
CD885128	CD885128	3.15331e-07	0	3.78187e-07	3.36524e-07	2.85303e-07	3.2954e-07	3.26087e-07	7.03992e-08	2.59461e-07	0	4.06875e-07	1.33805e-07	1.03411	0	0.686067	0	1.42611	0.406036	-0.967014	0	-1.45758	0	-0.701206	-2.46284
comp45347_c0_seq1	comp45347_c0_seq1 len=111 path=[0:0-110] : tr|F2DJC2|F2DJC2_HORVD Predicted protein OS=Hordeum vulgare var. distichum PE=2 SV=1 e-value: 1e-15 blast score: 82.8	0	6.09593e-08	0	0	5.70606e-08	0	0	1.40798e-07	0	0	0	6.69027e-08	0	2.30971	0	0	0	0	0	-0.432955	0	0	0	0
CA680830	CA680830 similar to UniRef100_Q43775 Cluster: Glycolate oxidase; n=1; Solanum lycopersicum|Rep: Glycolate oxidase - Solanum lycopersicum (Tomato) (Lycopersicon esculentum), partial (40%) #or# TC378300 similar to UniRef100_Q10CE4 Cluster: Expressed protein; n=1; Oryza sativa Japonica Group|Rep: Expressed protein - Oryza sativa subsp. japonica (Rice), partial (72%) #or# TC400032 homologue to UniRef…	0	0	0	5.60874e-08	2.28242e-07	1.09847e-07	8.15217e-08	7.03992e-08	1.55677e-07	0	0	1.33805e-07	0	0	0	0	0	1.21811	0	0	0	0	0	-0.820945
comp44964_c0_seq1	comp44964_c0_seq1 len=155 path=[0:0-154]	1.57665e-07	0	3.78187e-07	1.68262e-07	2.28242e-07	2.19694e-07	4.07609e-07	3.51996e-07	4.6703e-07	1.20467e-07	3.39062e-07	2.67611e-07	2.58528	0	1.23492	0.715949	1.48554	1.21811	-0.386806	0	-0.809769	-1.39675	-0.673158	-0.820945
CJ615910	CJ615910 similar to UniRef100_A2Q515 Cluster: Protein kinase; n=1; Medicago truncatula|Rep: Protein kinase - Medicago truncatula (Barrel medic), partial (9%)	1.65549e-06	2.62125e-06	1.32365e-06	1.3461e-06	2.11124e-06	1.42801e-06	1.30435e-06	1.12639e-06	1.55677e-06	9.63737e-07	1.96656e-06	2.14088e-06	0.787894	0.429713	1.17611	0.715949	0.931471	1.49921	-1.26921	-2.32713	-0.850258	-1.39675	-1.07357	-0.667018
TC23708	TC23708 similar to UniRef100_A7QB48 Cluster: Chromosome chr4 scaffold_73, whole genome shotgun sequence; n=1; Vitis vinifera|Rep: Chromosome chr4 scaffold_73, whole genome shotgun sequence - Vitis vinifera (Grape), partial (85%)	7.88327e-08	3.04797e-07	0	0	0	0	0	3.51996e-07	0	0	0	0	0	1.15485	0	0	0	0	0	-0.86591	0	0	0	0
comp31136_c0_seq1	comp31136_c0_seq1 len=219 path=[0:0-218]	2.36498e-07	3.04797e-07	0	1.68262e-07	4.56485e-07	4.39387e-07	3.26087e-07	7.03992e-08	2.59461e-07	0	1.35625e-07	3.34513e-07	1.37882	0.230971	0	0	0.297107	0.761318	-0.72526	-4.32955	0	0	-3.36579	-1.31351
CK215943	CK215943 homologue to UniRef100_Q9ZRS5 Cluster: Ribulose bisphosphate carboxylase small chain; n=1; Secale cereale|Rep: Ribulose bisphosphate carboxylase small chain - Secale cereale (Rye), partial (98%)	0	6.09593e-08	0	0	0	0	0	7.03992e-08	0	1.20467e-07	0	0	0	1.15485	0	0	0	0	0	-0.86591	0	0	0	0
comp15591_c0_seq1	comp15591_c0_seq1 len=225 path=[0:0-224]	9.45992e-07	7.92471e-07	1.13456e-06	1.12175e-06	6.84727e-07	5.49234e-07	8.15217e-07	1.19679e-06	8.30275e-07	1.0842e-06	6.10312e-07	1.07044e-06	0.861759	1.51019	0.731804	0.966531	0.891321	1.94897	-1.16042	-0.662166	-1.36649	-1.03463	-1.12193	-0.513091
TC419799	TC419799 homologue to UniRef100_A4D8H9 Cluster: P450 monooxygenase; n=1; Hordeum vulgare subsp. vulgare|Rep: P450 monooxygenase - Hordeum vulgare var. distichum (Two-rowed barley), partial (32%)	2.04965e-06	7.31512e-07	3.78187e-06	9.25442e-06	4.62191e-06	4.17418e-06	3.66848e-06	2.81597e-06	1.29731e-06	4.33682e-06	6.78124e-07	2.4754e-06	1.78981	3.84951	0.343033	0.468621	0.14672	0.593026	-0.558719	-0.259773	-2.91517	-2.13392	-6.81572	-1.68627
comp7713_c0_seq1	comp7713_c0_seq1 len=429 path=[411:0-149 134:150-171 156:172-428] : tr|A2YGT6|A2YGT6_ORYSI Putative uncharacterized protein OS=Oryza sativa subsp. indica GN=OsI_24398 PE=4 SV=1 e-value: 3e-12 blast score: 71.2 #or# comp7713_c0_seq2 len=413 path=[0:0-133 134:134-155 156:156-412] : tr|A2YGT6|A2YGT6_ORYSI Putative uncharacterized protein OS=Oryza sativa subsp. indica GN=OsI_24398 PE=4 SV=1 e-value: …	3.94163e-06	5.2425e-06	5.10552e-06	6.56223e-06	7.98849e-06	6.59081e-06	4.64674e-06	3.30876e-06	4.92976e-06	5.66195e-06	4.61125e-06	5.61982e-06	1.17889	0.631141	0.965575	0.86281	0.577237	0.852676	-0.848258	-1.58443	-1.03565	-1.159	-1.73239	-1.17278
comp7016_c0_seq1	comp7016_c0_seq1 len=418 path=[0:0-417] : tr|F2EKS4|F2EKS4_HORVD Predicted protein OS=Hordeum vulgare var. distichum PE=2 SV=1 e-value: 6e-28 blast score: 123	3.30309e-05	3.16379e-05	4.31133e-05	4.6833e-05	4.3309e-05	4.02039e-05	3.15489e-05	3.29468e-05	5.83787e-05	3.96337e-05	4.42137e-05	4.07437e-05	0.955134	1.04137	1.35408	0.846277	1.02089	1.01343	-1.04697	-0.960272	-0.73851	-1.18165	-0.979538	-0.986752
GR303320	GR303320 similar to UniRef100_A7R050 Cluster: Chromosome chr10 scaffold_297, whole genome shotgun sequence; n=1; Vitis vinifera|Rep: Chromosome chr10 scaffold_297, whole genome shotgun sequence - Vitis vinifera (Grape), partial (20%)	3.15331e-07	1.21919e-07	9.45466e-07	6.16961e-07	6.27667e-07	1.6477e-07	8.15217e-08	1.40798e-07	3.11353e-07	3.61401e-07	4.06875e-07	5.35221e-07	0.258528	1.15485	0.329312	0.585776	0.648234	3.24829	-3.86806	-0.86591	-3.03663	-1.70714	-1.54265	-0.307854
comp20473_c0_seq1	comp20473_c0_seq1 len=294 path=[0:0-114 292:115-116 115:117-293]	6.30661e-07	4.87675e-07	0	0	0	0	6.52174e-07	6.33592e-07	0	0	0	0	1.03411	1.29921	0	0	0	0	-0.967014	-0.769698	0	0	0	0
comp6480_c0_seq1	comp6480_c0_seq1 len=324 path=[0:0-171 172:172-323] : tr|C5XUE7|C5XUE7_SORBI Putative uncharacterized protein Sb04g035750 OS=Sorghum bicolor GN=Sb04g035750 PE=4 SV=1 e-value: 1e-38 blast score: 159	1.05636e-05	1.17042e-05	4.72733e-06	1.18344e-05	1.3181e-05	1.36759e-05	1.1087e-05	9.57429e-06	1.26617e-05	5.66195e-06	1.83772e-05	8.96496e-06	1.04955	0.818022	2.6784	0.47843	1.39422	0.655528	-0.952793	-1.22246	-0.373357	-2.09017	-0.717249	-1.52549
comp24465_c0_seq1	comp24465_c0_seq1 len=221 path=[0:0-220]	1.65549e-06	9.1439e-07	1.51275e-06	2.41176e-06	1.82594e-06	1.75755e-06	1.38587e-06	1.75998e-06	1.55677e-06	1.80701e-06	1.01719e-06	1.33805e-06	0.837138	1.92476	1.0291	0.749249	0.557076	0.761318	-1.19455	-0.519546	-0.971723	-1.33467	-1.79509	-1.31351
comp1315_c0_seq2	comp1315_c0_seq2 len=277 path=[218:0-115 526:116-145 352:146-276]	3.23214e-06	3.41372e-06	0	0	0	0	3.83152e-06	2.95676e-06	5.18922e-08	1.20467e-07	0	0	1.18544	0.866141	0	0	0	0	-0.843565	-1.15455	0	0	0	0
comp44301_c0_seq1	comp44301_c0_seq1 len=170 path=[0:0-169] : tr|Q9SED7|Q9SED7_AEGVE Vrga1 OS=Aegilops ventricosa GN=Vrga1 PE=4 SV=1 e-value: 5e-21 blast score: 100	7.88327e-08	1.21919e-07	0	1.68262e-07	1.71182e-07	5.49234e-08	8.15217e-08	0	0	0	0	0	1.03411	0	0	0	0	0	-0.967014	0	0	0	0	0
TC241597	TC241597 weakly similar to UniRef100_Q7XBA1 Cluster: Glutathione S-transferase; n=1; Oryza sativa Japonica Group|Rep: Glutathione S-transferase - Oryza sativa subsp. japonica (Rice), partial (68%)	7.88327e-08	1.82878e-07	1.89093e-07	1.12175e-07	1.14121e-07	1.09847e-07	1.63043e-07	2.11197e-07	4.6703e-07	0	0	6.69027e-08	2.06822	1.15485	2.46984	0	0	0.609054	-0.483507	-0.86591	-0.404885	0	0	-1.64189
TC273470	TC273470 similar to UniRef100_Q8LI26 Cluster: Myb-related protein-like; n=1; Oryza sativa Japonica Group|Rep: Myb-related protein-like - Oryza sativa subsp. japonica (Rice), partial (10%)	1.57665e-07	6.09593e-08	1.89093e-07	1.12175e-07	1.14121e-07	1.09847e-07	3.26087e-07	0	5.18922e-08	1.20467e-07	1.35625e-07	1.33805e-07	2.06822	0	0.274427	1.07392	1.18843	1.21811	-0.483507	0	-3.64396	-0.931165	-0.841447	-0.820945
TC375346	TC375346 similar to UniRef100_A7P1V9 Cluster: Chromosome chr19 scaffold_4, whole genome shotgun sequence; n=1; Vitis vinifera|Rep: Chromosome chr19 scaffold_4, whole genome shotgun sequence - Vitis vinifera (Grape), partial (70%)	7.41027e-06	7.80279e-06	7.37464e-06	1.0264e-05	1.06703e-05	7.7442e-06	1.1413e-05	1.21087e-05	1.00671e-05	8.0713e-06	6.71343e-06	9.76779e-06	1.54017	1.55184	1.3651	0.78637	0.629168	1.2613	-0.649281	-0.644398	-0.732549	-1.27167	-1.5894	-0.792831
comp961_c0_seq1	comp961_c0_seq1 len=329 path=[0:0-328] : tr|Q5EI63|Q5EI63_TRIMO Quinone reductase 2 OS=Triticum monococcum PE=2 SV=1 e-value: 3e-04 blast score: 45.1	4.50923e-05	4.74264e-05	5.84298e-05	6.37153e-05	6.01989e-05	6.15691e-05	6.30978e-05	5.50521e-05	6.96912e-05	6.22815e-05	5.69625e-05	7.09168e-05	1.3993	1.16079	1.19273	0.977497	0.946237	1.15182	-0.714641	-0.861481	-0.83841	-1.02302	-1.05682	-0.868188
comp25054_c0_seq1	comp25054_c0_seq1 len=201 path=[0:0-200]	3.15331e-07	3.65756e-07	3.78187e-07	2.2435e-07	1.71182e-07	1.09847e-07	8.15217e-07	7.03992e-07	1.55677e-07	2.40934e-07	3.39062e-07	3.34513e-07	2.58528	1.92476	0.41164	1.07392	1.98071	3.04527	-0.386806	-0.519546	-2.42931	-0.931165	-0.504868	-0.328378
comp7693_c0_seq1	comp7693_c0_seq1 len=388 path=[0:0-387] : tr|E1ZQZ8|E1ZQZ8_CHLVA Putative uncharacterized protein OS=Chlorella variabilis GN=CHLNCDRAFT_139796 PE=4 SV=1 e-value: 7e-05 blast score: 47.0	3.54747e-06	6.03497e-06	3.02549e-06	3.42133e-06	4.90721e-06	4.11926e-06	2.52717e-06	3.44956e-06	6.43464e-06	2.28887e-06	3.255e-06	4.34867e-06	0.712388	0.571595	2.12681	0.669001	0.663309	1.05569	-1.40373	-1.74949	-0.470189	-1.49477	-1.50759	-0.947244
comp2346_c0_seq1	comp2346_c0_seq1 len=430 path=[0:0-429] : tr|F2D225|F2D225_HORVD Predicted protein OS=Hordeum vulgare var. distichum PE=2 SV=1 e-value: 3e-21 blast score: 101	1.72644e-05	1.44474e-05	9.75721e-05	0.000118793	0.000114064	3.33385e-05	3.97826e-05	3.99867e-05	3.66878e-05	6.7823e-05	1.99369e-05	5.19165e-05	2.30432	2.76775	0.376007	0.570934	0.174786	1.55725	-0.433967	-0.361304	-2.65953	-1.75152	-5.72127	-0.642157
comp1229_c0_seq1	comp1229_c0_seq1 len=549 path=[0:0-548] : tr|B8BLI0|B8BLI0_ORYSI Putative uncharacterized protein OS=Oryza sativa subsp. indica GN=OsI_36791 PE=3 SV=1 e-value: 2e-11 blast score: 69.3	4.61959e-05	5.0901e-05	4.91642e-05	4.49821e-05	5.52917e-05	4.36641e-05	4.92391e-05	5.44185e-05	3.88154e-05	4.01155e-05	4.34678e-05	4.50924e-05	1.06588	1.0691	0.789504	0.891811	0.786153	1.03271	-0.938196	-0.935362	-1.26662	-1.12131	-1.27202	-0.968326
TC420042	TC420042 homologue to UniRef100_Q00434 Cluster: Oxygen-evolving enhancer protein 2, chloroplast precursor; n=1; Triticum aestivum|Rep: Oxygen-evolving enhancer protein 2, chloroplast precursor - Triticum aestivum (Wheat), partial (14%)	9.45992e-06	1.06069e-05	1.13456e-05	9.14225e-06	9.415e-06	5.43742e-06	7.74457e-06	8.87029e-06	9.39249e-06	4.45728e-06	9.35812e-06	1.19087e-05	0.818671	0.836274	0.827854	0.487548	0.993958	2.19013	-1.22149	-1.19578	-1.20794	-2.05108	-1.00608	-0.456593
comp17918_c0_seq1	comp17918_c0_seq1 len=314 path=[0:0-313]	4.72996e-07	7.92471e-07	5.6728e-07	4.48699e-07	9.1297e-07	7.14004e-07	8.15217e-07	5.63193e-07	6.74599e-07	4.81868e-07	8.13749e-07	8.69734e-07	1.72352	0.71068	1.18918	1.07392	0.891321	1.21811	-0.580208	-1.4071	-0.840914	-0.931165	-1.12193	-0.820945
comp11819_c0_seq1	comp11819_c0_seq1 len=381 path=[0:0-380]	2.44381e-06	2.43837e-06	2.45821e-06	3.75786e-06	3.766e-06	3.02079e-06	6.52174e-07	0	0	0	0	6.69027e-08	0.266867	0	0	0	0	0.0221474	-3.74718	0	0	0	0	-45.152
BQ579786	BQ579786 weakly similar to UniRef100_A7PRQ1 Cluster: Chromosome chr14 scaffold_27, whole genome shotgun sequence; n=1; Vitis vinifera|Rep: Chromosome chr14 scaffold_27, whole genome shotgun sequence - Vitis vinifera (Grape), partial (12%)	1.57665e-06	1.70686e-06	1.32365e-06	5.60874e-07	7.98849e-07	1.37309e-06	1.54891e-06	1.26718e-06	6.74599e-07	7.22803e-07	1.01719e-06	6.69027e-07	0.982406	0.742406	0.509649	1.28871	1.27332	0.487243	-1.01791	-1.34697	-1.96213	-0.775971	-0.785351	-2.05236
comp11519_c0_seq1	comp11519_c0_seq1 len=210 path=[0:0-209]	2.20731e-06	1.52398e-06	4.53824e-06	4.20655e-06	2.85303e-06	2.47155e-06	2.20109e-06	2.67517e-06	2.6984e-06	2.40934e-06	3.39062e-06	2.5423e-06	0.997179	1.75538	0.594591	0.572759	1.18843	1.02862	-1.00283	-0.569678	-1.68183	-1.74594	-0.841447	-0.972172
comp22743_c0_seq1	comp22743_c0_seq1 len=493 path=[0:0-66 67:67-492] : tr|F2E6E1|F2E6E1_HORVD Predicted protein OS=Hordeum vulgare var. distichum PE=2 SV=1 e-value: 1e-16 blast score: 86.7	8.67159e-07	1.09727e-06	3.78187e-07	7.85224e-07	2.85303e-07	1.31816e-06	4.8913e-07	5.63193e-07	4.6703e-07	3.61401e-07	4.06875e-07	5.35221e-07	0.564061	0.513269	1.23492	0.460253	1.42611	0.406036	-1.77286	-1.9483	-0.809769	-2.17272	-0.701206	-2.46284
comp26337_c0_seq1	comp26337_c0_seq1 len=295 path=[0:0-294]	1.89198e-06	1.21919e-06	3.40368e-06	1.73871e-06	2.56773e-06	1.53786e-06	1.38587e-06	2.95676e-06	2.12758e-06	1.92747e-06	1.6275e-06	1.73947e-06	0.732496	2.42519	0.625083	1.10857	0.633828	1.1311	-1.3652	-0.412338	-1.59979	-0.902066	-1.57771	-0.884095
CJ526972	CJ526972 similar to UniRef100_Q38JJ5 Cluster: GAL83-like protein; n=1; Solanum tuberosum|Rep: GAL83-like protein - Solanum tuberosum (Potato), partial (9%)	0	0	0	0	5.70606e-08	0	4.07609e-07	7.03992e-08	5.70814e-07	1.20467e-07	2.7125e-07	4.68319e-07	0	0	0	0	4.75371	0	0	0	0	0	-0.210362	0
comp43350_c0_seq1	comp43350_c0_seq1 len=145 path=[0:0-144]	7.88327e-08	6.09593e-08	0	0	0	0	1.63043e-07	7.03992e-08	0	0	0	0	2.06822	1.15485	0	0	0	0	-0.483507	-0.86591	0	0	0	0
TC411244	TC411244 similar to UniRef100_Q2RAB7 Cluster: CCT motif family protein, expressed; n=2; Oryza sativa Japonica Group|Rep: CCT motif family protein, expressed - Oryza sativa subsp. japonica (Rice), partial (65%)	2.12848e-06	2.86509e-06	4.53824e-06	3.30916e-06	3.42364e-06	3.02079e-06	4.15761e-06	4.43515e-06	3.3211e-06	2.65028e-06	2.50906e-06	2.87681e-06	1.95332	1.548	0.731804	0.800892	0.732864	0.952339	-0.511949	-0.645996	-1.36649	-1.24861	-1.36451	-1.05005
comp15254_c0_seq1	comp15254_c0_seq1 len=233 path=[9:0-232]	1.73432e-06	1.28015e-06	0	0	0	0	1.46739e-06	1.26718e-06	0	0	0	0	0.846091	0.989875	0	0	0	0	-1.18191	-1.01023	0	0	0	0
comp23194_c0_seq1	comp23194_c0_seq1 len=454 path=[0:0-235 283:236-453] : tr|F2E9L1|F2E9L1_HORVD Predicted protein OS=Hordeum vulgare var. distichum PE=4 SV=1 e-value: 1e-08 blast score: 44.3	3.94163e-07	7.31512e-07	3.78187e-07	3.36524e-07	5.70606e-07	3.84464e-07	0	0	0	1.20467e-07	0	0	0	0	0	0.357974	0	0	0	0	0	-2.7935	0	0
TC435798	TC435798	4.88762e-06	5.48634e-06	2.45821e-06	5.44048e-06	5.47782e-06	6.04157e-06	5.05435e-06	4.71674e-06	5.96761e-06	3.73448e-06	5.62843e-06	5.61982e-06	1.03411	0.859725	2.42762	0.686425	1.0275	0.930192	-0.967014	-1.16316	-0.411926	-1.45682	-0.97324	-1.07505
comp36843_c0_seq1	comp36843_c0_seq1 len=200 path=[0:0-199]	0	1.82878e-07	0	5.60874e-08	5.70606e-08	5.49234e-08	0	7.03992e-08	0	0	1.35625e-07	6.69027e-08	0	0.384951	0	0	2.37686	1.21811	0	-2.59773	0	0	-0.420724	-0.820945
TC384143	TC384143 similar to UniRef100_A7PLE7 Cluster: Chromosome chr7 scaffold_20, whole genome shotgun sequence; n=1; Vitis vinifera|Rep: Chromosome chr7 scaffold_20, whole genome shotgun sequence - Vitis vinifera (Grape), partial (68%)	0	1.82878e-07	0	1.68262e-07	5.70606e-08	1.09847e-07	8.15217e-08	7.03992e-08	0	0	6.78124e-08	6.69027e-08	0	0.384951	0	0	1.18843	0.609054	0	-2.59773	0	0	-0.841447	-1.64189
TC457373	TC457373	0	6.09593e-08	1.89093e-07	5.60874e-08	1.14121e-07	5.49234e-08	0	0	5.18922e-08	0	0	6.69027e-08	0	0	0.274427	0	0	1.21811	0	0	-3.64396	0	0	-0.820945
TC438760	TC438760 similar to UniRef100_A7PXC1 Cluster: Chromosome chr12 scaffold_36, whole genome shotgun sequence; n=1; Vitis vinifera|Rep: Chromosome chr12 scaffold_36, whole genome shotgun sequence - Vitis vinifera (Grape), partial (30%)	8.67159e-07	7.92471e-07	9.45466e-07	1.29001e-06	7.98849e-07	7.68928e-07	7.33696e-07	8.4479e-07	4.6703e-07	3.61401e-07	4.06875e-07	1.00354e-06	0.846091	1.06602	0.493968	0.280154	0.509326	1.30512	-1.18191	-0.938069	-2.02442	-3.56947	-1.96338	-0.766216
comp24232_c0_seq1	comp24232_c0_seq1 len=175 path=[0:0-174]	3.15331e-07	2.43837e-07	0	0	0	0	8.15217e-08	2.81597e-07	0	0	0	0	0.258528	1.15485	0	0	0	0	-3.86806	-0.86591	0	0	0	0
comp1782_c0_seq1	comp1782_c0_seq1 len=616 path=[0:0-615] : tr|F2DAY3|F2DAY3_HORVD Predicted protein OS=Hordeum vulgare var. distichum PE=2 SV=1 e-value: 7e-22 blast score: 104	3.42134e-05	3.48078e-05	4.33024e-05	4.72256e-05	3.76029e-05	3.00431e-05	5.30707e-05	4.68154e-05	3.64283e-05	3.39717e-05	3.66187e-05	4.30184e-05	1.55117	1.34497	0.841255	0.71935	0.973826	1.43189	-0.644676	-0.743511	-1.1887	-1.39014	-1.02688	-0.698378
TC379363	TC379363	2.36498e-07	7.31512e-07	1.89093e-07	3.92612e-07	5.13545e-07	4.39387e-07	2.44565e-07	4.22395e-07	3.63246e-07	4.81868e-07	6.78124e-07	4.68319e-07	1.03411	0.577427	1.92099	1.22734	1.32048	1.06584	-0.967014	-1.73182	-0.520566	-0.81477	-0.757303	-0.938223
CD882636	CD882636 similar to UniRef100_Q6ZFC1 Cluster: Pentatricopeptide (PPR) repeat-containing protein-like protein; n=1; Oryza sativa Japonica Group|Rep: Pentatricopeptide (PPR) repeat-containing protein-like protein - Oryza sativa subsp. japonica (Rice), partial (16%)	1.60819e-05	1.55446e-05	2.13675e-05	1.55362e-05	1.91153e-05	1.37309e-05	2.19293e-05	2.55549e-05	1.42185e-05	1.79496e-05	1.59359e-05	1.83982e-05	1.36361	1.64397	0.665424	1.15534	0.833674	1.33992	-0.733349	-0.608284	-1.5028	-0.865546	-1.19951	-0.746314
CK198155	CK198155 similar to UniRef100_A7PEK1 Cluster: Chromosome chr11 scaffold_13, whole genome shotgun sequence; n=1; Vitis vinifera|Rep: Chromosome chr11 scaffold_13, whole genome shotgun sequence - Vitis vinifera (Grape), partial (50%)	7.88327e-07	4.26715e-07	0	1.12175e-07	1.14121e-07	3.84464e-07	3.26087e-07	0	2.59461e-07	0	1.35625e-07	6.69027e-08	0.413645	0	0	0	1.18843	0.174015	-2.41753	0	0	0	-0.841447	-5.74662
TC257564	TC257564 similar to UniRef100_Q3EDL5 Cluster: Uncharacterized protein At1g01140.1; n=1; Arabidopsis thaliana|Rep: Uncharacterized protein At1g01140.1 - Arabidopsis thaliana (Mouse-ear cress), partial (67%)	1.19037e-05	1.06679e-05	5.86189e-06	9.03007e-06	9.35794e-06	8.01882e-06	7.58152e-06	5.63193e-06	4.72219e-06	5.05962e-06	5.35718e-06	5.48602e-06	0.636903	0.527933	0.805575	0.560308	0.572475	0.684143	-1.5701	-1.89418	-1.24135	-1.78473	-1.7468	-1.46168
comp22538_c0_seq1	comp22538_c0_seq1 len=231 path=[0:0-230]	3.15331e-07	6.09593e-07	0	1.68262e-07	0	3.84464e-07	2.44565e-07	4.92794e-07	1.24541e-06	2.40934e-07	2.03437e-07	6.02124e-07	0.775583	0.808398	0	1.4319	0	1.56614	-1.28935	-1.23701	0	-0.698374	0	-0.638513
comp8512_c0_seq1	comp8512_c0_seq1 len=323 path=[0:0-160 161:161-162 163:163-167 168:168-191 192:192-322] : tr|A5ADA6|A5ADA6_VITVI Putative uncharacterized protein OS=Vitis vinifera GN=VITISV_000716 PE=4 SV=1 e-value: 7e-05 blast score: 47.0	1.26132e-06	1.82878e-06	0	7.29136e-07	6.27667e-07	1.31816e-06	7.33696e-07	4.92794e-07	4.15138e-07	4.81868e-07	4.06875e-07	6.69027e-07	0.581688	0.269466	0	0.660876	0.648234	0.507545	-1.71914	-3.71104	0	-1.51314	-1.54265	-1.97027
TC423957	TC423957	7.09494e-07	8.53431e-07	9.45466e-07	1.3461e-06	1.48358e-06	5.49234e-07	4.8913e-07	2.11197e-07	8.30275e-07	2.40934e-07	6.10312e-07	7.35929e-07	0.689408	0.247469	0.878165	0.178987	0.411379	1.33992	-1.45052	-4.04091	-1.13874	-5.58699	-2.43085	-0.746314
comp26250_c0_seq1	comp26250_c0_seq1 len=240 path=[0:0-239] : tr|F2DVJ1|F2DVJ1_HORVD Predicted protein OS=Hordeum vulgare var. distichum PE=2 SV=1 e-value: 9e-39 blast score: 159	5.51829e-07	1.82878e-07	5.6728e-07	7.29136e-07	1.02709e-06	4.39387e-07	3.26087e-07	2.81597e-07	6.22707e-07	2.40934e-07	6.10312e-07	2.00708e-07	0.590921	1.53981	1.09771	0.330438	0.594214	0.456791	-1.69227	-0.649432	-0.91099	-3.02629	-1.68289	-2.18919
comp1788_c0_seq1	comp1788_c0_seq1 len=522 path=[0:0-521]	2.78279e-05	2.72488e-05	3.93314e-05	2.03036e-05	2.03706e-05	2.54845e-05	5.47011e-05	5.01946e-05	2.53753e-05	2.63823e-05	3.65509e-05	2.82998e-05	1.96569	1.84208	0.645166	1.29939	1.79429	1.11047	-0.508727	-0.542864	-1.54999	-0.769593	-0.557322	-0.900517
TC16014	TC16014 similar to UniRef100_Q2VY15 Cluster: CONSTANS interacting protein 4; n=1; Solanum lycopersicum|Rep: CONSTANS interacting protein 4 - Solanum lycopersicum (Tomato) (Lycopersicon esculentum), partial (68%)	3.8628e-06	3.23084e-06	0	0	0	0	3.17935e-06	4.71674e-06	5.18922e-08	0	6.78124e-08	0	0.823068	1.45991	0	0	0	0	-1.21497	-0.684974	0	0	0	0
comp5630_c0_seq1	comp5630_c0_seq1 len=107 path=[0:0-106] : tr|C1K5B9|C1K5B9_WHEAT Chlorophyll a-b binding protein OS=Triticum aestivum GN=CBP5 PE=2 SV=1 e-value: 5e-13 blast score: 73.9	7.88327e-07	5.48634e-07	0	4.48699e-07	1.71182e-07	4.39387e-07	6.52174e-07	8.4479e-07	4.15138e-07	1.0842e-06	0	2.00708e-07	0.827289	1.53981	0	2.41633	0	0.456791	-1.20877	-0.649432	0	-0.413851	0	-2.18919
comp3853_c0_seq1	comp3853_c0_seq1 len=428 path=[0:0-427] : tr|F2DIL7|F2DIL7_HORVD Predicted protein OS=Hordeum vulgare var. distichum PE=2 SV=1 e-value: 1e-08 blast score: 59.3	1.7422e-05	1.32282e-05	2.79858e-05	3.80833e-05	2.40796e-05	2.73519e-05	3.79076e-05	2.94972e-05	1.91482e-05	3.07191e-05	1.49187e-05	2.31483e-05	2.17585	2.22988	0.684212	0.806629	0.61956	0.846316	-0.459592	-0.448455	-1.46153	-1.23973	-1.61405	-1.18159
TC245590	TC245590 UniRef100_O22575 Cluster: Glycine decarboxylase P subunit; n=1; x Tritordeum sp.|Rep: Glycine decarboxylase P subunit - x Tritordeum sp, partial (53%)	0	6.09593e-08	0	0	0	5.49234e-08	0	7.03992e-08	1.03784e-07	1.20467e-07	0	0	0	1.15485	0	0	0	0	0	-0.86591	0	0	0	0
comp6631_c0_seq1	comp6631_c0_seq1 len=390 path=[0:0-389]	6.93727e-06	4.57195e-06	6.25899e-05	3.05676e-05	3.43505e-05	1.62573e-05	7.98913e-06	4.92794e-06	4.6703e-06	1.27695e-05	8.67999e-06	1.94018e-05	1.15162	1.07786	0.0746175	0.417746	0.252689	1.19342	-0.868339	-0.927761	-13.4017	-2.3938	-3.95743	-0.83793
comp5947_c0_seq1	comp5947_c0_seq1 len=611 path=[0:0-610] : tr|F7VPF3|F7VPF3_SORMK Putative uncharacterized protein SMAC_12073 OS=Sordaria macrospora (strain ATCC MYA-333 / DSM 997 / K(L3346) / K-hell) GN=SMAC_12073 PE=4 SV=1 e-value: 9e-06 blast score: 52.0	1.03271e-05	9.93637e-06	1.00219e-05	2.00793e-05	1.29528e-05	1.77403e-05	1.07609e-05	1.30238e-05	1.06898e-05	1.50584e-05	1.81737e-05	1.55214e-05	1.04201	1.31072	1.06664	0.749946	1.40308	0.874926	-0.959688	-0.762937	-0.937524	-1.33343	-0.712719	-1.14295
comp32642_c0_seq1	comp32642_c0_seq1 len=220 path=[0:0-219]	7.88327e-08	2.43837e-07	5.6728e-07	2.2435e-07	5.70606e-08	5.49234e-08	2.85326e-06	2.81597e-06	1.40109e-06	1.80701e-06	1.22062e-06	2.4085e-06	36.1939	11.5485	2.46984	8.05442	21.3917	43.8519	-0.027629	-0.086591	-0.404885	-0.124155	-0.0467471	-0.022804
comp15429_c0_seq1	comp15429_c0_seq1 len=663 path=[0:0-662]	3.46864e-06	3.2918e-06	6.61826e-06	7.34745e-06	6.04842e-06	4.61357e-06	4.72826e-06	4.78714e-06	5.18922e-06	5.66195e-06	5.35718e-06	4.75009e-06	1.36315	1.45426	0.784076	0.770601	0.885716	1.02959	-0.733597	-0.687634	-1.27539	-1.29769	-1.12903	-0.971259
comp39098_c0_seq1	comp39098_c0_seq1 len=152 path=[0:0-151]	1.57665e-07	6.09593e-08	0	5.60874e-08	1.14121e-07	0	0	1.40798e-07	0	0	0	0	0	2.30971	0	0	0	0	0	-0.432955	0	0	0	0
comp20551_c0_seq1	comp20551_c0_seq1 len=380 path=[0:0-379] : tr|Q70JP6|Q70JP6_WHEAT Putative Zn-finger protein (Putative swim protein) (Fragment) OS=Triticum aestivum PE=2 SV=1 e-value: 5e-11 blast score: 59.7	1.02482e-06	1.28015e-06	2.64731e-06	2.46785e-06	1.99712e-06	1.70263e-06	3.66848e-06	2.60477e-06	1.55677e-06	1.32514e-06	2.37344e-06	3.01062e-06	3.57962	2.03474	0.588057	0.536962	1.18843	1.76822	-0.27936	-0.491462	-1.70052	-1.86233	-0.841447	-0.56554
comp27243_c0_seq1	comp27243_c0_seq1 len=298 path=[0:0-297]	3.15331e-07	5.48634e-07	0	0	0	0	3.26087e-07	1.40798e-07	0	0	0	0	1.03411	0.256634	0	0	0	0	-0.967014	-3.89659	0	0	0	0
TC1708	TC1708 similar to UniRef100_A7NWS1 Cluster: Chromosome chr5 scaffold_2, whole genome shotgun sequence; n=1; Vitis vinifera|Rep: Chromosome chr5 scaffold_2, whole genome shotgun sequence - Vitis vinifera (Grape), partial (94%)	7.88327e-08	0	0	0	0	0	8.15217e-08	1.40798e-07	0	0	0	0	1.03411	0	0	0	0	0	-0.967014	0	0	0	0	0
comp5260_c0_seq1	comp5260_c0_seq1 len=596 path=[0:0-595] : tr|F2D6D2|F2D6D2_HORVD Predicted protein OS=Hordeum vulgare var. distichum PE=2 SV=1 e-value: 2e-10 blast score: 66.6	4.95857e-05	5.52292e-05	4.02769e-05	5.60874e-05	6.76739e-05	5.93722e-05	3.5625e-05	3.75227e-05	6.04544e-05	4.60184e-05	6.46931e-05	5.11805e-05	0.718453	0.679401	1.50097	0.820477	0.955953	0.862028	-1.39188	-1.47188	-0.666235	-1.2188	-1.04608	-1.16005
comp1485_c0_seq1	comp1485_c0_seq1 len=398 path=[0:0-397] : tr|Q9M7S3|Q9M7S3_LOLPR 4-coumarate--CoA ligase 4CL1 OS=Lolium perenne PE=2 SV=1 e-value: 6e-12 blast score: 70.5	2.77491e-05	3.32838e-05	1.30474e-05	1.89575e-05	2.32237e-05	3.2954e-05	1.69565e-05	1.6051e-05	2.77104e-05	1.52993e-05	3.45843e-05	2.86343e-05	0.611066	0.482247	2.12382	0.807031	1.48919	0.868917	-1.63649	-2.07363	-0.470849	-1.23911	-0.671508	-1.15086
TC17724	TC17724 homologue to UniRef100_A5ALB2 Cluster: Proteasome subunit alpha type; n=1; Vitis vinifera|Rep: Proteasome subunit alpha type - Vitis vinifera (Grape), complete	7.88327e-08	0	0	0	0	0	2.44565e-07	0	0	0	0	0	3.10233	0	0	0	0	0	-0.322338	0	0	0	0	0
comp3542_c0_seq1	comp3542_c0_seq1 len=325 path=[0:0-324]	1.67125e-05	1.99947e-05	1.6262e-05	2.12571e-05	1.93435e-05	2.18595e-05	1.64674e-05	1.72478e-05	2.21061e-05	1.80701e-05	1.85128e-05	2.04053e-05	0.985332	0.86262	1.35937	0.850071	0.957053	0.933475	-1.01489	-1.15926	-0.735635	-1.17637	-1.04487	-1.07127
CV759141	CV759141 weakly similar to UniRef100_UPI000016298C Cluster: protein phosphatase 2C family protein / PP2C family protein; n=1; Arabidopsis thaliana|Rep: protein phosphatase 2C family protein / PP2C family protein - Arabidopsis thaliana, partial (8%)	7.88327e-08	1.21919e-07	0	0	0	5.49234e-08	0	1.40798e-07	1.03784e-07	1.20467e-07	0	0	0	1.15485	0	0	0	0	0	-0.86591	0	0	0	0
TC275044	TC275044 similar to UniRef100_A4QMB9 Cluster: ORF124; n=1; Pinus koraiensis|Rep: ORF124 - Pinus koraiensis (Korean pine), partial (48%)	3.79973e-05	3.93797e-05	0	0	0	0	4.33696e-05	3.5622e-05	2.59461e-07	1.20467e-07	2.03437e-07	2.00708e-07	1.14138	0.904576	0	0	0	0	-0.876129	-1.10549	0	0	0	0
comp17226_c0_seq1	comp17226_c0_seq1 len=410 path=[0:0-409] : tr|B9FTG3|B9FTG3_ORYSJ Putative uncharacterized protein OS=Oryza sativa subsp. japonica GN=OsJ_21457 PE=4 SV=1 e-value: 4e-19 blast score: 94.4	1.10366e-06	1.03631e-06	1.51275e-06	1.51436e-06	1.71182e-06	1.26324e-06	1.54891e-06	1.40798e-06	1.81623e-06	1.20467e-06	1.01719e-06	1.73947e-06	1.40344	1.35865	1.20062	0.795499	0.594214	1.37699	-0.712537	-0.736023	-0.832906	-1.25707	-1.68289	-0.726221
TC446680	TC446680 weakly similar to UniRef100_A7PLN4 Cluster: Chromosome chr7 scaffold_20, whole genome shotgun sequence; n=1; Vitis vinifera|Rep: Chromosome chr7 scaffold_20, whole genome shotgun sequence - Vitis vinifera (Grape), partial (48%)	7.88327e-08	1.21919e-07	0	1.12175e-07	5.70606e-08	0	8.15217e-08	7.03992e-08	1.55677e-07	0	6.78124e-08	6.69027e-08	1.03411	0.577427	0	0	1.18843	0	-0.967014	-1.73182	0	0	-0.841447	0
comp12831_c0_seq1	comp12831_c0_seq1 len=349 path=[0:0-160 161:161-348]	2.04965e-06	2.62125e-06	3.21459e-06	3.08481e-06	2.28242e-06	2.19694e-06	2.20109e-06	1.83038e-06	2.43893e-06	2.77074e-06	2.7125e-06	3.88035e-06	1.07388	0.698284	0.758709	0.89819	1.18843	1.76626	-0.931199	-1.43208	-1.31803	-1.11335	-0.841447	-0.566169
comp3039_c0_seq1	comp3039_c0_seq1 len=483 path=[0:0-482]	1.6476e-05	1.47522e-05	2.68512e-05	2.22106e-05	2.84732e-05	1.54884e-05	2.09511e-05	2.0275e-05	2.37147e-05	2.05999e-05	1.42406e-05	1.41165e-05	1.27161	1.37437	0.88319	0.927479	0.50014	0.911421	-0.786404	-0.727605	-1.13226	-1.07819	-1.99944	-1.09719
TC271646	TC271646 similar to UniRef100_A5NQT8 Cluster: LigA; n=1; Methylobacterium sp. 4-46|Rep: LigA - Methylobacterium sp. 4-46, partial (4%)	7.88327e-08	1.21919e-07	0	2.2435e-07	5.70606e-08	1.6477e-07	1.63043e-07	7.03992e-08	0	2.40934e-07	6.78124e-08	1.33805e-07	2.06822	0.577427	0	1.07392	1.18843	0.812072	-0.483507	-1.73182	0	-0.931165	-0.841447	-1.23142
comp25576_c0_seq1	comp25576_c0_seq1 len=118 path=[0:0-117]	0	1.21919e-07	0	5.60874e-08	5.70606e-08	5.49234e-08	8.15217e-08	0	5.18922e-08	1.20467e-07	6.78124e-08	6.69027e-08	0	0	0	2.14785	1.18843	1.21811	0	0	0	-0.465583	-0.841447	-0.820945
comp5656_c0_seq1	comp5656_c0_seq1 len=532 path=[0:0-531]	1.05636e-05	1.13994e-05	1.00219e-05	1.51436e-05	1.95718e-05	1.16987e-05	6.60326e-06	8.0959e-06	1.56196e-05	1.24081e-05	1.11212e-05	1.83982e-05	0.625097	0.710205	1.55854	0.819364	0.568228	1.57267	-1.59975	-1.40804	-0.641628	-1.22046	-1.75986	-0.635859
CD053822	CD053822 homologue to UniRef100_Q0Z9W2 Cluster: Histone deacetylase HDAC3; n=1; Triticum aestivum|Rep: Histone deacetylase HDAC3 - Triticum aestivum (Wheat), partial (28%)	0	0	0	1.12175e-07	1.14121e-07	1.09847e-07	8.15217e-08	0	1.03784e-07	2.40934e-07	1.35625e-07	0	0	0	0	2.14785	1.18843	0	0	0	0	-0.465583	-0.841447	0
comp43823_c0_seq1	comp43823_c0_seq1 len=210 path=[0:0-209]	1.57665e-07	6.09593e-08	0	5.60874e-08	5.70606e-08	0	8.15217e-08	0	0	0	0	6.69027e-08	0.517056	0	0	0	0	0	-1.93403	0	0	0	0	0
comp19506_c0_seq1	comp19506_c0_seq1 len=378 path=[0:0-377]	1.02482e-06	7.31512e-07	9.45466e-07	3.53351e-06	1.5977e-06	1.59278e-06	3.83152e-06	2.74557e-06	1.29731e-06	2.52981e-06	1.49187e-06	2.00708e-06	3.73871	3.75328	1.37213	0.715949	0.933765	1.26011	-0.267472	-0.266434	-0.728792	-1.39675	-1.07093	-0.79358
comp35166_c0_seq1	comp35166_c0_seq1 len=176 path=[0:0-175]	3.15331e-07	0	3.78187e-07	5.60874e-08	2.85303e-07	1.09847e-07	3.26087e-07	7.03992e-08	1.55677e-07	2.40934e-07	2.03437e-07	3.34513e-07	1.03411	0	0.41164	4.29569	0.713057	3.04527	-0.967014	0	-2.42931	-0.232791	-1.40241	-0.328378
comp9551_c0_seq2	comp9551_c0_seq2 len=311 path=[542:0-14 137:15-38 161:39-310]	7.88327e-08	6.09593e-08	0	1.12175e-07	5.70606e-08	0	0	7.03992e-08	0	0	0	6.69027e-08	0	1.15485	0	0	0	0	0	-0.86591	0	0	0	0
TC246651	TC246651 homologue to UniRef100_Q69UB8 Cluster: GTPase activating protein-like; n=3; Oryza sativa|Rep: GTPase activating protein-like - Oryza sativa subsp. japonica (Rice), partial (31%)	1.49782e-06	1.40206e-06	1.51275e-06	2.46785e-06	1.5977e-06	1.09847e-06	7.33696e-07	1.05599e-06	7.78383e-07	1.0842e-06	6.10312e-07	7.35929e-07	0.489842	0.753166	0.51455	0.439332	0.381995	0.669959	-2.04147	-1.32773	-1.94345	-2.27618	-2.61784	-1.49263
CD877672	CD877672 similar to UniRef100_Q9ZRZ2 Cluster: GRAB2 protein; n=1; Triticum sp.|Rep: GRAB2 protein - Triticum sp, partial (24%)	7.88327e-08	0	0	1.12175e-07	1.14121e-07	5.49234e-08	0	0	1.03784e-07	1.20467e-07	2.03437e-07	6.69027e-08	0	0	0	1.07392	1.78264	1.21811	0	0	0	-0.931165	-0.560965	-0.820945
comp42274_c0_seq1	comp42274_c0_seq1 len=180 path=[0:0-179]	7.88327e-08	0	1.89093e-07	5.60874e-08	0	1.09847e-07	8.15217e-08	1.40798e-07	5.18922e-08	3.61401e-07	2.7125e-07	1.33805e-07	1.03411	0	0.274427	6.44354	0	1.21811	-0.967014	0	-3.64396	-0.155194	0	-0.820945
comp99_c0_seq1	comp99_c0_seq1 len=556 path=[0:0-555] : tr|F2E1P3|F2E1P3_HORVD Predicted protein OS=Hordeum vulgare var. distichum PE=2 SV=1 e-value: 6e-45 blast score: 181	0.000422701	0.000408915	0.000414682	0.000380385	0.000422705	0.000374797	0.000351033	0.000392968	0.000436258	0.000421273	0.000423285	0.000452998	0.830452	0.961001	1.05203	1.10749	1.00137	1.20865	-1.20416	-1.04058	-0.950542	-0.90294	-0.998629	-0.827371
comp10915_c0_seq1	comp10915_c0_seq1 len=225 path=[0:0-224]	1.49782e-06	1.6459e-06	3.40368e-06	3.30916e-06	3.42364e-06	2.08709e-06	2.52717e-06	1.47838e-06	1.71244e-06	3.13214e-06	1.96656e-06	1.87327e-06	1.68723	0.89822	0.503115	0.946508	0.574407	0.897553	-0.592686	-1.11331	-1.98762	-1.05651	-1.74093	-1.11414
comp20456_c0_seq1	comp20456_c0_seq1 len=208 path=[0:0-207]	4.72996e-07	4.87675e-07	0	1.68262e-07	2.85303e-07	7.14004e-07	8.15217e-08	0	1.55677e-07	0	6.78124e-07	6.69027e-08	0.172352	0	0	0	2.37686	0.0937006	-5.80208	0	0	0	-0.420724	-10.6723
TC255711	TC255711 similar to UniRef100_A7P675 Cluster: Chromosome chr4 scaffold_6, whole genome shotgun sequence; n=1; Vitis vinifera|Rep: Chromosome chr4 scaffold_6, whole genome shotgun sequence - Vitis vinifera (Grape), partial (93%)	1.10366e-06	6.09593e-07	3.78187e-07	9.53486e-07	9.1297e-07	8.23851e-07	8.15217e-07	4.22395e-07	7.26491e-07	1.0842e-06	6.10312e-07	1.20425e-06	0.738651	0.692913	1.92099	1.1371	0.668491	1.46173	-1.35382	-1.44318	-0.520566	-0.879434	-1.49591	-0.684121
FC555855	FC555855 #or# TC260538 similar to UniRef100_Q2R3B9 Cluster: Expressed protein; n=2; Oryza sativa Japonica Group|Rep: Expressed protein - Oryza sativa subsp. japonica (Rice), partial (20%)	1.34016e-06	2.37741e-06	2.26912e-06	4.65525e-06	2.96715e-06	2.19694e-06	2.03804e-06	2.04158e-06	1.86812e-06	1.92747e-06	1.83094e-06	1.94018e-06	1.52075	0.858738	0.82328	0.414043	0.617069	0.883128	-0.657569	-1.1645	-1.21465	-2.41521	-1.62057	-1.13234
TC380655	TC380655 similar to UniRef100_A7PPM7 Cluster: Chromosome chr8 scaffold_23, whole genome shotgun sequence; n=1; Vitis vinifera|Rep: Chromosome chr8 scaffold_23, whole genome shotgun sequence - Vitis vinifera (Grape), partial (39%)	1.02482e-06	7.31512e-07	9.45466e-07	5.04787e-07	1.14121e-06	4.94311e-07	1.22283e-06	7.03992e-07	1.03784e-06	6.02335e-07	6.10312e-07	8.02832e-07	1.19321	0.962379	1.09771	1.19325	0.534793	1.62414	-0.838079	-1.03909	-0.91099	-0.838049	-1.86988	-0.615709
comp13116_c0_seq1	comp13116_c0_seq1 len=115 path=[0:0-114] : tr|F6K744|F6K744_WHEAT Chloroplast light-harvesting chlorophyll a/b binding protein OS=Triticum aestivum PE=2 SV=1 e-value: 3e-15 blast score: 81.6	9.45992e-07	4.26715e-07	0	0	5.70606e-08	0	3.26087e-07	4.92794e-07	0	0	0	1.33805e-07	0.344704	1.15485	0	0	0	0	-2.90104	-0.86591	0	0	0	0
CV055547	CV055547 homologue to UniRef100_Q84JH5 Cluster: COG1208, GCD1, Nucleoside-diphosphate-sugar pyrophosphorylase involved in lipopolysaccharide biosynthesis/translation initiation factor 2B, gamma/epsilon subunits (EIF-2Bgamma/eIF-2Bepsilon) [Cell envelope biogenesis, outer membrane / Translation, ribosomal structure and biogenesis]; n=1; Oryza sativa Japonica Group|Rep: COG1208, GCD1, Nucleoside-di…	0	1.82878e-07	0	2.80437e-07	0	5.49234e-08	8.15217e-08	2.11197e-07	5.18922e-08	0	1.35625e-07	2.00708e-07	0	1.15485	0	0	0	3.65432	0	-0.86591	0	0	0	-0.273648
comp5802_c0_seq1	comp5802_c0_seq1 len=297 path=[0:0-296]	5.99128e-06	8.10759e-06	7.56373e-06	9.87138e-06	9.58618e-06	7.79912e-06	1.1087e-05	8.3071e-06	7.3687e-06	9.39643e-06	6.78124e-06	9.56708e-06	1.85051	1.02461	0.974214	0.951886	0.707398	1.22669	-0.54039	-0.975983	-1.02647	-1.05055	-1.41363	-0.815204
comp9370_c0_seq1	comp9370_c0_seq1 len=284 path=[0:0-283]	6.38545e-06	6.58361e-06	1.26692e-05	1.3461e-05	1.2211e-05	9.33698e-06	9.86413e-06	8.87029e-06	9.60006e-06	1.15648e-05	7.73062e-06	8.42973e-06	1.54478	1.34733	0.757745	0.859138	0.633088	0.902833	-0.64734	-0.742209	-1.31971	-1.16396	-1.57956	-1.10762
TC246763	TC246763 homologue to UniRef100_A2WV89 Cluster: Phosphatidate cytidylyltransferase; n=1; Oryza sativa Indica Group|Rep: Phosphatidate cytidylyltransferase - Oryza sativa subsp. indica (Rice), partial (86%)	6.85844e-06	8.96102e-06	9.45466e-06	8.41311e-06	1.04992e-05	9.28206e-06	5.29891e-06	5.70233e-06	1.1053e-05	7.34849e-06	1.05787e-05	1.11058e-05	0.772612	0.636348	1.16906	0.873457	1.00758	1.19648	-1.29431	-1.57147	-0.85539	-1.14488	-0.992476	-0.835782
TC377259	TC377259 similar to UniRef100_A7PR54 Cluster: ATP-dependent Clp protease proteolytic subunit; n=1; Vitis vinifera|Rep: ATP-dependent Clp protease proteolytic subunit - Vitis vinifera (Grape), partial (52%)	1.97082e-06	2.19454e-06	2.08003e-06	1.29001e-06	2.05418e-06	2.36171e-06	3.0163e-06	3.09756e-06	1.08974e-06	1.44561e-06	2.57687e-06	2.4754e-06	1.53048	1.41149	0.523905	1.12062	1.25445	1.04814	-0.653388	-0.708472	-1.90874	-0.892367	-0.797161	-0.954071
comp12075_c0_seq1	comp12075_c0_seq1 len=326 path=[0:0-325]	1.7895e-05	1.87755e-05	1.98548e-05	2.36128e-05	2.58485e-05	1.82346e-05	1.75272e-05	1.8515e-05	2.62056e-05	1.71063e-05	1.93944e-05	1.94687e-05	0.979445	0.986126	1.31986	0.724452	0.75031	1.06768	-1.02099	-1.01407	-0.757655	-1.38035	-1.33278	-0.936611
CD907298	CD907298 similar to UniRef100_A7QE27 Cluster: Chromosome chr4 scaffold_83, whole genome shotgun sequence; n=1; Vitis vinifera|Rep: Chromosome chr4 scaffold_83, whole genome shotgun sequence - Vitis vinifera (Grape), partial (30%)	2.83798e-06	1.6459e-06	4.53824e-06	4.20655e-06	3.13833e-06	2.74617e-06	7.58152e-06	6.82872e-06	4.56652e-06	5.90289e-06	3.32281e-06	5.35221e-06	2.67145	4.14892	1.00623	1.40326	1.05878	1.94897	-0.374328	-0.241026	-0.993808	-0.712627	-0.944482	-0.513091
comp2234_c0_seq1	comp2234_c0_seq1 len=403 path=[0:0-402]	2.03388e-05	1.75563e-05	1.28583e-05	1.6714e-05	1.62623e-05	2.21891e-05	5.95109e-06	1.26718e-06	7.78383e-07	8.4327e-07	9.49374e-07	6.69027e-07	0.292597	0.0721784	0.0605353	0.0504528	0.0583789	0.0301512	-3.41767	-13.8546	-16.5193	-19.8205	-17.1295	-33.1662
CA676359	CA676359 similar to UniRef100_Q0E2K8 Cluster: Os02g0230300 protein; n=2; Oryza sativa Japonica Group|Rep: Os02g0230300 protein - Oryza sativa subsp. japonica (Rice), partial (54%)	0	1.21919e-07	0	0	0	0	0	7.03992e-08	0	0	0	6.69027e-08	0	0.577427	0	0	0	0	0	-1.73182	0	0	0	0
comp10776_c0_seq1	comp10776_c0_seq1 len=572 path=[4:0-571] : tr|B9RMR5|B9RMR5_RICCO Photosystem II core complex proteins psbY, chloroplast OS=Ricinus communis GN=RCOM_1082890 PE=3 SV=1 e-value: 4e-30 blast score: 131	3.46864e-06	3.23084e-06	0	0	0	0	3.91304e-06	3.44956e-06	0	1.20467e-07	0	6.69027e-08	1.12812	1.0677	0	0	0	0	-0.886429	-0.936596	0	0	0	0
comp7334_c0_seq1	comp7334_c0_seq1 len=273 path=[0:0-272]	4.41463e-06	3.41372e-06	4.34914e-06	6.50614e-06	5.99136e-06	3.73479e-06	5.46196e-06	4.43515e-06	5.60436e-06	5.90289e-06	4.34e-06	6.22195e-06	1.23724	1.29921	1.28861	0.90728	0.724375	1.66594	-0.80825	-0.769698	-0.776029	-1.1022	-1.3805	-0.600261
comp19507_c0_seq1	comp19507_c0_seq1 len=232 path=[137:0-53 191:54-91 229:92-231]	7.88327e-08	3.65756e-07	3.78187e-07	3.36524e-07	2.28242e-07	3.84464e-07	4.8913e-07	1.05599e-06	4.6703e-07	4.81868e-07	6.78124e-07	5.35221e-07	6.20467	2.88714	1.23492	1.4319	2.97107	1.39212	-0.161169	-0.346364	-0.809769	-0.698374	-0.336579	-0.718327
comp39878_c0_seq1	comp39878_c0_seq1 len=199 path=[0:0-198]	1.57665e-07	6.09593e-08	0	0	0	0	8.15217e-08	2.11197e-07	0	0	0	0	0.517056	3.46456	0	0	0	0	-1.93403	-0.288637	0	0	0	0
comp5641_c0_seq1	comp5641_c0_seq1 len=541 path=[0:0-540]	1.02482e-05	1.03631e-05	1.24802e-05	1.35171e-05	1.42652e-05	1.13691e-05	1.50815e-05	1.58398e-05	9.23681e-06	1.42151e-05	1.1935e-05	1.47186e-05	1.47162	1.52848	0.74012	1.05164	0.836654	1.29461	-0.679523	-0.654243	-1.35113	-0.950893	-1.19524	-0.772435
comp13326_c0_seq1	comp13326_c0_seq1 len=156 path=[0:0-155]	5.51829e-07	1.82878e-07	1.32365e-06	6.73049e-07	3.99424e-07	2.74617e-07	1.46739e-06	2.60477e-06	9.85952e-07	7.22803e-07	6.78124e-08	1.33805e-07	2.65914	14.2432	0.744872	1.07392	0.169775	0.487243	-0.376061	-0.0702089	-1.34251	-0.931165	-5.89013	-2.05236
comp8569_c0_seq1	comp8569_c0_seq1 len=405 path=[0:0-404] : tr|F2DFJ5|F2DFJ5_HORVD Predicted protein (Fragment) OS=Hordeum vulgare var. distichum PE=2 SV=1 e-value: 4e-04 blast score: 44.3	5.67595e-06	5.05962e-06	8.13101e-06	7.1231e-06	7.64612e-06	5.32757e-06	8.07065e-06	8.3071e-06	5.50058e-06	4.93915e-06	5.15375e-06	6.35575e-06	1.4219	1.64184	0.676493	0.693399	0.674034	1.19299	-0.703283	-0.609072	-1.47821	-1.44217	-1.4836	-0.838228
comp3079_c0_seq1	comp3079_c0_seq1 len=421 path=[0:0-420]	1.553e-05	1.88974e-05	1.90984e-05	2.2435e-05	2.45931e-05	2.25186e-05	9.78261e-06	6.96952e-06	8.35465e-06	7.34849e-06	8.40874e-06	8.22903e-06	0.629916	0.368808	0.437452	0.327547	0.341914	0.365432	-1.58751	-2.71144	-2.28596	-3.053	-2.92471	-2.73648
comp15144_c0_seq1	comp15144_c0_seq1 len=251 path=[227:0-29 29:30-250] : tr|G0ZDY0|G0ZDY0_9ROSI Ribosomal protein L27a (Fragment) OS=Dimocarpus longan GN=L27a PE=2 SV=1 e-value: 2e-08 blast score: 58.5	9.45992e-07	1.09727e-06	0	0	0	0	1.71196e-06	1.40798e-06	0	0	0	1.33805e-07	1.80969	1.28317	0	0	0	0	-0.552579	-0.779319	0	0	0	0
comp366_c0_seq1	comp366_c0_seq1 len=389 path=[0:0-293 309:294-388] #or# comp366_c0_seq2 len=317 path=[0:0-293 396:294-316]	0.000160661	0.000140389	0.000255276	0.00032727	0.000246331	0.000211235	0.000199158	0.000192964	0.000175967	0.000258402	0.000122741	0.000188799	1.23961	1.37449	0.689319	0.789568	0.498276	0.893786	-0.806703	-0.727541	-1.45071	-1.26652	-2.00692	-1.11884
TC449564	TC449564 similar to UniRef100_A0KZ92 Cluster: Diguanylate cyclase; n=1; Shewanella sp. ANA-3|Rep: Diguanylate cyclase - Shewanella sp. (strain ANA-3), partial (4%)	7.88327e-07	7.92471e-07	9.45466e-07	1.51436e-06	9.7003e-07	1.42801e-06	1.46739e-06	1.05599e-06	9.85952e-07	6.02335e-07	1.085e-06	7.35929e-07	1.8614	1.33252	1.04282	0.397749	1.11852	0.515353	-0.53723	-0.750455	-0.958937	-2.51415	-0.894038	-1.94042
comp42148_c0_seq1	comp42148_c0_seq1 len=144 path=[0:0-143]	0	6.09593e-08	0	5.60874e-08	0	5.49234e-08	1.63043e-07	3.51996e-07	8.30275e-07	0	2.03437e-07	2.00708e-07	0	5.77427	0	0	0	3.65432	0	-0.173182	0	0	0	-0.273648
comp6708_c0_seq1	comp6708_c0_seq1 len=569 path=[0:0-568] : tr|F2CQU3|F2CQU3_HORVD Predicted protein OS=Hordeum vulgare var. distichum PE=2 SV=1 e-value: 2e-06 blast score: 52.8	1.46629e-05	1.29843e-05	1.75857e-05	1.87332e-05	2.15118e-05	1.63123e-05	2.36413e-05	1.7459e-05	2.52715e-05	1.49379e-05	1.70209e-05	1.87327e-05	1.61232	1.34462	1.43705	0.797404	0.791235	1.14838	-0.620223	-0.743705	-0.695869	-1.25407	-1.26385	-0.870788
comp5793_c0_seq1	comp5793_c0_seq1 len=312 path=[0:0-311] : tr|F2DG93|F2DG93_HORVD Predicted protein OS=Hordeum vulgare var. distichum PE=2 SV=1 e-value: 2e-05 blast score: 48.9	6.14895e-06	8.47335e-06	5.86189e-06	6.61831e-06	7.07552e-06	6.26127e-06	5.05435e-06	6.33592e-06	9.49628e-06	5.30055e-06	9.08687e-06	8.76425e-06	0.821986	0.747748	1.62	0.800892	1.28427	1.39976	-1.21657	-1.33735	-0.617283	-1.24861	-0.778653	-0.71441
comp33731_c0_seq1	comp33731_c0_seq1 len=153 path=[0:0-152] : tr|B7ZX64|B7ZX64_MAIZE Putative uncharacterized protein OS=Zea mays PE=2 SV=1 e-value: 4e-20 blast score: 97.4	7.88327e-08	5.48634e-07	0	0	0	5.49234e-07	8.15217e-08	1.40798e-07	2.07569e-07	0	5.425e-07	6.69027e-08	1.03411	0.256634	0	0	0	0.121811	-0.967014	-3.89659	0	0	0	-8.20945
comp30397_c0_seq1	comp30397_c0_seq1 len=246 path=[0:0-245]	3.15331e-07	3.04797e-07	0	0	0	0	8.15217e-08	2.11197e-07	0	0	0	0	0.258528	0.692913	0	0	0	0	-3.86806	-1.44318	0	0	0	0
comp1438_c0_seq1	comp1438_c0_seq1 len=576 path=[7:0-575] : tr|F2D7J2|F2D7J2_HORVD Predicted protein OS=Hordeum vulgare var. distichum PE=2 SV=1 e-value: 3e-27 blast score: 122	5.35274e-05	5.66312e-05	5.69171e-05	6.22009e-05	6.53915e-05	5.51431e-05	3.9538e-05	4.6745e-05	5.54728e-05	5.40897e-05	6.2184e-05	6.83076e-05	0.738651	0.825429	0.974625	0.869597	0.95095	1.23873	-1.35382	-1.21149	-1.02604	-1.14996	-1.05158	-0.807276
CJ841557	CJ841557 similar to UniRef100_Q2Y2M5 Cluster: Phosphoprotein; n=1; Avian metapneumovirus|Rep: Phosphoprotein - Avian metapneumovirus, partial (5%)	7.88327e-08	3.65756e-07	1.89093e-07	2.2435e-07	1.14121e-07	3.2954e-07	4.07609e-07	2.11197e-07	2.59461e-07	1.20467e-07	1.35625e-07	2.67611e-07	5.17056	0.577427	1.37213	0.536962	1.18843	0.812072	-0.193403	-1.73182	-0.728792	-1.86233	-0.841447	-1.23142
comp15920_c0_seq1	comp15920_c0_seq1 len=372 path=[0:0-371]	2.60148e-06	1.46302e-06	1.32365e-06	2.80437e-06	1.36945e-06	2.08709e-06	1.54891e-06	1.26718e-06	2.23137e-06	1.44561e-06	1.35625e-06	1.67257e-06	0.595397	0.866141	1.68576	0.515483	0.990357	0.801387	-1.67955	-1.15455	-0.593203	-1.93993	-1.00974	-1.24784
TC374025	TC374025 homologue to UniRef100_A7PGW1 Cluster: Chromosome chr17 scaffold_16, whole genome shotgun sequence; n=1; Vitis vinifera|Rep: Chromosome chr17 scaffold_16, whole genome shotgun sequence - Vitis vinifera (Grape), partial (17%)	7.88327e-08	1.21919e-07	1.89093e-07	5.60874e-08	1.14121e-07	2.19694e-07	0	0	1.03784e-07	0	4.74687e-07	2.00708e-07	0	0	0.548853	0	4.1595	0.913581	0	0	-1.82198	0	-0.240414	-1.09459
comp9474_c0_seq1	comp9474_c0_seq1 len=140 path=[0:0-139]	1.57665e-07	3.65756e-07	1.89093e-07	5.60874e-08	2.85303e-07	1.6477e-07	3.26087e-07	2.81597e-07	1.03784e-07	2.40934e-07	4.74687e-07	8.69734e-07	2.06822	0.769903	0.548853	4.29569	1.6638	5.27847	-0.483507	-1.29886	-1.82198	-0.232791	-0.601034	-0.189449
comp4942_c0_seq1	comp4942_c0_seq1 len=461 path=[0:0-460]	8.35626e-06	7.98567e-06	8.88738e-06	1.07688e-05	9.47206e-06	9.33698e-06	1.11685e-05	9.01109e-06	7.73194e-06	6.50522e-06	8.81562e-06	9.96849e-06	1.33654	1.12841	0.869991	0.604082	0.930697	1.06764	-0.748201	-0.886205	-1.14944	-1.65541	-1.07446	-0.936649
comp7801_c0_seq1	comp7801_c0_seq1 len=363 path=[0:0-362]	3.8628e-06	3.47468e-06	9.45466e-06	7.34745e-06	5.87724e-06	5.43742e-06	7.17391e-06	4.43515e-06	3.94381e-06	5.66195e-06	3.52625e-06	4.88389e-06	1.85718	1.27642	0.417128	0.770601	0.599983	0.898201	-0.538451	-0.783442	-2.39734	-1.29769	-1.66671	-1.11334
comp3497_c0_seq1	comp3497_c0_seq1 len=365 path=[0:0-364] : tr|Q7F442|Q7F442_ORYSJ P0696G06.12 protein OS=Oryza sativa subsp. japonica GN=P0696G06.12 PE=4 SV=1 e-value: 3e-06 blast score: 51.6	9.38109e-06	1.10336e-05	5.10552e-06	9.25442e-06	9.92855e-06	7.68928e-06	6.84783e-06	8.5183e-06	1.22466e-05	7.95083e-06	9.90062e-06	1.07044e-05	0.729961	0.77203	2.39869	0.859138	0.997187	1.39212	-1.36994	-1.29529	-0.416894	-1.16396	-1.00282	-0.718327
comp9824_c0_seq1	comp9824_c0_seq1 len=373 path=[0:0-372]	7.17377e-06	8.53431e-06	7.75282e-06	9.25442e-06	9.64324e-06	1.03805e-05	6.7663e-06	6.89912e-06	1.11568e-05	7.58943e-06	9.35812e-06	1.09051e-05	0.9432	0.808398	1.43907	0.820087	0.970433	1.05054	-1.06022	-1.23701	-0.694895	-1.21938	-1.03047	-0.951893
comp2123_c0_seq1	comp2123_c0_seq1 len=382 path=[0:0-381] : tr|F2D5U6|F2D5U6_HORVD Lipoxygenase OS=Hordeum vulgare var. distichum PE=2 SV=1 e-value: 1e-30 blast score: 132	1.5057e-05	2.76755e-05	2.00439e-05	3.47742e-06	5.30664e-06	2.86151e-05	7.5163e-05	5.10394e-05	0.000288054	1.79496e-05	0.000119146	0.000117013	4.99189	1.84421	14.3712	5.16176	22.4524	4.0892	-0.200325	-0.542239	-0.0695838	-0.193732	-0.0445388	-0.244547
comp1217_c0_seq1	comp1217_c0_seq1 len=470 path=[0:0-469] : sp|O04437|GSTZ_WHEAT Glutathione S-transferase OS=Triticum aestivum GN=GSTZ1 PE=1 SV=1 e-value: 1e-13 blast score: 76.3	4.22543e-05	3.38934e-05	0.000126882	0.00011655	0.000116518	6.44252e-05	0.000106549	7.55383e-05	0.000121583	6.73411e-05	7.83912e-05	0.000109118	2.52161	2.2287	0.958244	0.577789	0.672783	1.69372	-0.396572	-0.448691	-1.04358	-1.73073	-1.48636	-0.590416
comp5018_c0_seq1	comp5018_c0_seq1 len=573 path=[0:0-572] : tr|F2CYP2|F2CYP2_HORVD Predicted protein OS=Hordeum vulgare var. distichum PE=2 SV=1 e-value: 2e-05 blast score: 50.1	1.15096e-05	1.23138e-05	6.61826e-06	6.05744e-06	6.79021e-06	1.45547e-05	1.02717e-05	1.19679e-05	1.1053e-05	6.02335e-06	2.94984e-05	2.01377e-05	0.892452	0.971907	1.67008	0.994373	4.34426	1.38359	-1.12051	-1.0289	-0.598773	-1.00566	-0.230189	-0.722759
comp1030_c0_seq1	comp1030_c0_seq1 len=291 path=[0:0-290] : tr|F2E2M3|F2E2M3_HORVD Predicted protein OS=Hordeum vulgare var. distichum PE=2 SV=1 e-value: 3e-23 blast score: 108	3.37404e-05	4.26715e-05	1.53166e-05	1.91819e-05	2.55632e-05	3.70733e-05	2.47011e-05	3.04124e-05	4.47311e-05	2.05999e-05	4.55022e-05	4.10782e-05	0.732093	0.71271	2.92044	1.07392	1.77999	1.10803	-1.36595	-1.40309	-0.342414	-0.931165	-0.561801	-0.902505
TC405527	TC405527 similar to UniRef100_A7PKM1 Cluster: Chromosome chr7 scaffold_20, whole genome shotgun sequence; n=1; Vitis vinifera|Rep: Chromosome chr7 scaffold_20, whole genome shotgun sequence - Vitis vinifera (Grape), complete	2.36498e-07	2.43837e-07	5.6728e-07	2.80437e-07	7.41788e-07	3.84464e-07	3.26087e-07	7.03992e-08	6.22707e-07	6.02335e-07	5.425e-07	2.67611e-07	1.37882	0.288714	1.09771	2.14785	0.731341	0.696062	-0.72526	-3.46364	-0.91099	-0.465583	-1.36735	-1.43665
CK214423	CK214423 homologue to UniRef100_Q5I7L5 Cluster: 60S ribosomal protein L36; n=1; Triticum aestivum|Rep: 60S ribosomal protein L36 - Triticum aestivum (Wheat), complete	1.57665e-07	1.21919e-07	0	5.60874e-08	5.70606e-08	1.6477e-07	2.44565e-07	7.03992e-08	0	0	6.78124e-08	6.69027e-08	1.55117	0.577427	0	0	1.18843	0.406036	-0.644676	-1.73182	0	0	-0.841447	-2.46284
TC442579	TC442579 homologue to UniRef100_Q0JNQ2 Cluster: Os01g0273000 protein; n=2; Oryza sativa|Rep: Os01g0273000 protein - Oryza sativa subsp. japonica (Rice), partial (88%)	2.46746e-05	2.26769e-05	5.23788e-05	5.42365e-05	4.73032e-05	2.86151e-05	2.67391e-05	2.86525e-05	3.49754e-05	3.97541e-05	2.65147e-05	3.15781e-05	1.08367	1.26351	0.667738	0.732977	0.560525	1.10355	-0.922791	-0.791446	-1.49759	-1.3643	-1.78404	-0.90617
comp16410_c0_seq1	comp16410_c0_seq1 len=399 path=[0:0-261 748:262-264 262:265-398]	7.88327e-07	7.31512e-07	1.89093e-07	8.41311e-07	8.55909e-07	6.04157e-07	5.70652e-07	2.81597e-07	5.18922e-07	0	3.39062e-07	3.34513e-07	0.723878	0.384951	2.74427	0	0.396143	0.553686	-1.38145	-2.59773	-0.364396	0	-2.52434	-1.80608
TC370028	TC370028 similar to UniRef100_A7QCD4 Cluster: Chromosome undetermined scaffold_77, whole genome shotgun sequence; n=1; Vitis vinifera|Rep: Chromosome undetermined scaffold_77, whole genome shotgun sequence - Vitis vinifera (Grape), partial (25%) #or# TC370795 similar to UniRef100_A7QCD4 Cluster: Chromosome undetermined scaffold_77, whole genome shotgun sequence; n=1; Vitis vinifera|Rep: Chromosom…	1.57665e-07	6.09593e-08	3.78187e-07	1.12175e-07	5.70606e-08	2.74617e-07	8.15217e-08	1.40798e-07	1.03784e-07	2.40934e-07	6.78124e-08	2.00708e-07	0.517056	2.30971	0.274427	2.14785	1.18843	0.730865	-1.93403	-0.432955	-3.64396	-0.465583	-0.841447	-1.36824
comp10841_c0_seq1	comp10841_c0_seq1 len=529 path=[0:0-528] : tr|F2CZ70|F2CZ70_HORVD Predicted protein OS=Hordeum vulgare var. distichum PE=2 SV=1 e-value: 4e-06 blast score: 52.0	4.65113e-06	5.18154e-06	3.59277e-06	5.38439e-06	5.24958e-06	5.1628e-06	4.4837e-06	5.27994e-06	4.04759e-06	3.49355e-06	3.32281e-06	5.1515e-06	0.964002	1.01899	1.12659	0.648829	0.632967	0.997812	-1.03734	-0.981365	-0.887632	-1.54124	-1.57986	-1.00219
comp18085_c0_seq1	comp18085_c0_seq1 len=292 path=[0:0-291] : tr|F2DL55|F2DL55_HORVD Predicted protein OS=Hordeum vulgare var. distichum PE=2 SV=1 e-value: 3e-17 blast score: 88.2	1.49782e-06	5.48634e-07	2.64731e-06	3.87003e-06	9.1297e-07	2.5814e-06	2.93478e-06	2.53437e-06	6.22707e-07	3.13214e-06	7.45937e-07	1.40496e-06	1.95937	4.61942	0.235223	0.809333	0.817045	0.544261	-0.510368	-0.216477	-4.25129	-1.23558	-1.22392	-1.83735
comp8314_c0_seq1	comp8314_c0_seq1 len=383 path=[0:0-235 562:236-382]	2.20731e-06	2.01166e-06	1.89093e-06	4.8796e-06	1.71182e-06	2.36171e-06	4.80978e-06	3.37916e-06	2.6465e-06	4.81868e-06	1.69531e-06	2.94372e-06	2.17902	1.67979	1.39958	0.987515	0.990357	1.24644	-0.458922	-0.595313	-0.714502	-1.01264	-1.00974	-0.802287
TC14022	TC14022 similar to UniRef100_Q8VWY6 Cluster: Polcalcin Nic t 1; n=1; Nicotiana tabacum|Rep: Polcalcin Nic t 1 - Nicotiana tabacum (Common tobacco), complete	1.57665e-07	0	0	0	0	0	8.15217e-08	1.40798e-07	0	0	0	0	0.517056	0	0	0	0	0	-1.93403	0	0	0	0	0
comp6471_c0_seq1	comp6471_c0_seq1 len=577 path=[0:0-319 320:320-333 347:334-576] : tr|F2D533|F2D533_HORVD Predicted protein OS=Hordeum vulgare var. distichum PE=2 SV=1 e-value: 3e-25 blast score: 115	4.49346e-06	3.9014e-06	3.40368e-06	4.93569e-06	6.39079e-06	4.00941e-06	5.21739e-06	4.99834e-06	2.85407e-06	2.28887e-06	5.01812e-06	6.15504e-06	1.16111	1.28117	0.838526	0.46374	0.785212	1.53515	-0.861247	-0.780539	-1.19257	-2.15638	-1.27354	-0.651402
comp28546_c0_seq1	comp28546_c0_seq1 len=372 path=[0:0-371]	2.36498e-07	3.65756e-07	5.6728e-07	3.92612e-07	4.56485e-07	1.6477e-07	8.15217e-08	7.03992e-08	5.18922e-08	2.40934e-07	3.39062e-07	2.00708e-07	0.344704	0.192476	0.0914755	0.61367	0.742768	1.21811	-2.90104	-5.19546	-10.9319	-1.62954	-1.34632	-0.820945
comp19038_c0_seq1	comp19038_c0_seq1 len=418 path=[0:0-417]	1.49782e-06	5.48634e-07	2.45821e-06	3.58959e-06	1.99712e-06	1.75755e-06	5.38044e-06	2.46397e-06	7.26491e-07	4.33682e-06	4.06875e-07	1.13735e-06	3.59218	4.4911	0.295536	1.20816	0.203731	0.64712	-0.278383	-0.222663	-3.38368	-0.827703	-4.90844	-1.54531
comp705_c0_seq1	comp705_c0_seq1 len=378 path=[0:0-377] : tr|Q56TP4|Q56TP4_WHEAT Endotransglucosylase/hydrolase XTH1 OS=Triticum aestivum PE=2 SV=1 e-value: 1e-11 blast score: 69.7	6.3145e-05	8.57088e-05	8.69829e-06	1.16101e-05	1.72894e-05	6.00862e-05	1.71196e-05	1.42206e-05	1.44779e-05	9.27597e-06	3.48556e-05	2.21448e-05	0.271115	0.165918	1.66446	0.798957	2.01601	0.36855	-3.68847	-6.02708	-0.600797	-1.25163	-0.496028	-2.71334
BE216201	BE216201 homologue to UniRef100_Q9ZRS6 Cluster: Ribulose bisphosphate carboxylase small chain; n=1; Secale cereale|Rep: Ribulose bisphosphate carboxylase small chain - Secale cereale (Rye), partial (83%) #or# TC242967 homologue to UniRef100_Q9FRZ2 Cluster: Ribulose bisphosphate carboxylase small chain; n=1; Triticum aestivum|Rep: Ribulose bisphosphate carboxylase small chain - Triticum aestivum (…	7.88327e-08	2.43837e-07	1.89093e-07	0	0	0	8.15217e-08	0	2.07569e-07	0	2.03437e-07	0	1.03411	0	1.09771	0	0	0	-0.967014	0	-0.91099	0	0	0
comp5856_c0_seq1	comp5856_c0_seq1 len=555 path=[0:0-277 551:278-279 278:280-554]	3.54747e-06	3.77948e-06	2.08003e-06	2.29958e-06	3.25245e-06	3.24048e-06	4.97283e-06	4.50555e-06	2.75029e-06	2.28887e-06	3.05156e-06	3.41204e-06	1.4018	1.19211	1.32224	0.995343	0.938233	1.05294	-0.713371	-0.83885	-0.756294	-1.00468	-1.06583	-0.949721
comp43465_c0_seq1	comp43465_c0_seq1 len=111 path=[1:0-110]	1.57665e-07	6.09593e-07	7.56373e-07	5.04787e-07	4.56485e-07	3.2954e-07	4.07609e-07	2.81597e-07	2.59461e-07	4.81868e-07	4.06875e-07	4.01416e-07	2.58528	0.461942	0.343033	0.954598	0.891321	1.21811	-0.386806	-2.16477	-2.91517	-1.04756	-1.12193	-0.820945
TC392400	TC392400 similar to UniRef100_A7P5B9 Cluster: Chromosome chr4 scaffold_6, whole genome shotgun sequence; n=1; Vitis vinifera|Rep: Chromosome chr4 scaffold_6, whole genome shotgun sequence - Vitis vinifera (Grape), partial (51%) #or# TC442252 weakly similar to UniRef100_A7P5B9 Cluster: Chromosome chr4 scaffold_6, whole genome shotgun sequence; n=1; Vitis vinifera|Rep: Chromosome chr4 scaffold_6, w…	7.88327e-08	6.09593e-08	1.89093e-07	1.12175e-07	1.14121e-07	1.09847e-07	2.44565e-07	2.11197e-07	2.07569e-07	0	2.03437e-07	1.33805e-07	3.10233	3.46456	1.09771	0	1.78264	1.21811	-0.322338	-0.288637	-0.91099	0	-0.560965	-0.820945
TC435656	TC435656 weakly similar to UniRef100_A7PI36 Cluster: Chromosome chr13 scaffold_17, whole genome shotgun sequence; n=1; Vitis vinifera|Rep: Chromosome chr13 scaffold_17, whole genome shotgun sequence - Vitis vinifera (Grape), partial (8%)	9.06576e-06	6.70553e-06	2.28803e-05	1.66019e-05	1.39228e-05	1.31816e-05	2.46196e-05	2.21053e-05	1.61385e-05	1.79496e-05	1.45797e-05	1.85989e-05	2.71567	3.29658	0.705344	1.08118	1.04718	1.41098	-0.368234	-0.303344	-1.41775	-0.924916	-0.954945	-0.70873
comp5425_c0_seq1	comp5425_c0_seq1 len=474 path=[390:0-109 49:110-473] #or# comp5425_c0_seq2 len=413 path=[0:0-48 49:49-412]	8.67159e-06	8.65622e-06	8.88738e-06	9.19833e-06	1.16974e-05	9.3919e-06	6.19565e-06	8.0255e-06	1.12606e-05	9.8783e-06	1.13925e-05	1.0972e-05	0.714477	0.927137	1.26703	1.07392	0.973932	1.16824	-1.39963	-1.07859	-0.789245	-0.931165	-1.02677	-0.855986
BJ481220	BJ481220	3.94163e-07	4.26715e-07	1.89093e-07	3.92612e-07	6.84727e-07	3.2954e-07	4.07609e-07	4.22395e-07	4.15138e-07	3.61401e-07	4.06875e-07	8.69734e-07	1.03411	0.989875	2.19541	0.920505	0.594214	2.63923	-0.967014	-1.01023	-0.455495	-1.08636	-1.68289	-0.378898
comp8443_c0_seq1	comp8443_c0_seq1 len=354 path=[0:0-353]	8.59276e-06	7.01032e-06	1.32365e-05	1.44705e-05	1.08415e-05	1.12593e-05	1.28804e-05	1.29534e-05	9.96331e-06	1.06011e-05	7.18812e-06	1.08382e-05	1.49899	1.84777	0.752713	0.732599	0.663018	0.962603	-0.667117	-0.541194	-1.32853	-1.365	-1.50825	-1.03885
[truncated: 16,408 more rows]
